# Supplementary material for: Pharmacological dimerization and activation of the exchange factor eIF2B antagonizes the integrated stress response
Source: eLife. 2015 Apr 15;4:e07314. doi: 10.7554/eLife.07314 (PMC4426669; doi:10.7554/eLife.07314)
Supplement: Figure 1—source data 2. — DOI: http://dx.doi.org/10.7554/eLife.07314.005 [file elife07314s002.xlsx]

## Sheet: Tg alone
Entrez GeneID	Symbol	(H)igher or (L)ower reporter	P value	Gene information
80204	FBXO11	L	1.85571e-12	F-box protein 11
22985	ACIN1	L	2.72982e-12	apoptotic chromatin condensation inducer 1
55737	VPS35	L	2.87336e-12	vacuolar protein sorting 35 homolog (S. cerevisiae)
10802	SEC24A	L	3.89594e-11	SEC24 family, member A (S. cerevisiae)
8665	EIF3F	L	5.62265e-11	eukaryotic translation initiation factor 3, subunit F
55832	CAND1	H	1.81739e-10	cullin-associated and neddylation-dissociated 1
2161	F12	H	4.01461e-10	coagulation factor XII (Hageman factor)
10273	STUB1	H	1.31251e-09	STIP1 homology and U-box containing protein 1, E3 ubiquitin protein ligase
8570	KHSRP	H	3.04408e-09	KH-type splicing regulatory protein
10483	SEC23B	L	3.15143e-09	Sec23 homolog B (S. cerevisiae)
51699	VPS29	L	7.22301e-09	vacuolar protein sorting 29 homolog (S. cerevisiae)
551	AVP	H	7.81181e-09	arginine vasopressin
84572	GNPTG	H	1.28341e-08	N-acetylglucosamine-1-phosphate transferase, gamma subunit
3187	HNRNPH1	L	1.35985e-08	heterogeneous nuclear ribonucleoprotein H1 (H)
160	AP2A1	H	2.36309e-08	adaptor-related protein complex 2, alpha 1 subunit
8532	CPZ	H	3.04694e-08	carboxypeptidase Z
400668	PRSS57	H	4.02914e-08	protease, serine, 57
10525	HYOU1	H	4.12595e-08	hypoxia up-regulated 1
29801	ZDHHC8	H	4.23819e-08	zinc finger, DHHC-type containing 8
11182	SLC2A6	H	6.39258e-08	solute carrier family 2 (facilitated glucose transporter), member 6
158248	TTC16	H	1.05172e-07	tetratricopeptide repeat domain 16
57418	WDR18	H	1.07094e-07	WD repeat domain 18
8615	USO1	L	1.17223e-07	USO1 vesicle docking protein homolog (yeast)
29952	DPP7	H	1.57021e-07	dipeptidyl-peptidase 7
6129	RPL7	L	2.10759e-07	ribosomal protein L7
144699	FBXL14	H	2.22959e-07	F-box and leucine-rich repeat protein 14
143941	TTC36	H	5.22929e-07	tetratricopeptide repeat domain 36
2553	GABPB1	L	7.23535e-07	GA binding protein transcription factor, beta subunit 1
84875	PARP10	H	7.43878e-07	poly (ADP-ribose) polymerase family, member 10
2253	FGF8	H	7.71861e-07	fibroblast growth factor 8 (androgen-induced)
90850	ZNF598	H	9.56439e-07	zinc finger protein 598
440400	RNASEK	H	1.41785e-06	ribonuclease, RNase K
10410	IFITM3	H	1.48096e-06	interferon induced transmembrane protein 3 (1-8U)
23256	SCFD1	L	1.60574e-06	sec1 family domain containing 1
91319	DERL3	H	1.71483e-06	Der1-like domain family, member 3
80019	UBTD1	H	1.82829e-06	ubiquitin domain containing 1
54863	C9orf167	H	1.84963e-06	chromosome 9 open reading frame 167
8661	EIF3A	L	1.95185e-06	eukaryotic translation initiation factor 3, subunit A
79798	ARMC5	H	2.16511e-06	armadillo repeat containing 5
9636	ISG15	H	2.55358e-06	ISG15 ubiquitin-like modifier
8370	HIST2H4A	H	2.96923e-06	histone cluster 2, H4a
9559	VPS26A	L	3.55085e-06	vacuolar protein sorting 26 homolog A (S. pombe)
10567	RABAC1	H	4.4724e-06	Rab acceptor 1 (prenylated)
393	ARHGAP4	H	4.5046e-06	Rho GTPase activating protein 4
1175	AP2S1	H	4.60256e-06	adaptor-related protein complex 2, sigma 1 subunit
27132	CPNE7	H	4.62239e-06	copine VII
4738	NEDD8	H	5.62067e-06	neural precursor cell expressed, developmentally down-regulated 8
192111	PGAM5	H	5.78265e-06	phosphoglycerate mutase family member 5
1	A1BG	H	5.98694e-06	alpha-1-B glycoprotein
114822	RHPN1	H	8.70871e-06	rhophilin, Rho GTPase binding protein 1
116988	AGAP3	H	8.91752e-06	ArfGAP with GTPase domain, ankyrin repeat and PH domain 3
215	ABCD1	H	9.65313e-06	ATP-binding cassette, sub-family D (ALD), member 1
158056	MAMDC4	H	9.70688e-06	MAM domain containing 4
136371	ASB10	H	9.86982e-06	ankyrin repeat and SOCS box containing 10
113878	DTX2	H	9.88352e-06	deltex homolog 2 (Drosophila)
8510	MMP23B	H	1.31099e-05	matrix metallopeptidase 23B
10728	PTGES3	L	1.3473e-05	prostaglandin E synthase 3 (cytosolic)
9736	USP34	H	1.37521e-05	ubiquitin specific peptidase 34
374882	TMEM205	H	1.4803e-05	transmembrane protein 205
5225	PGC	H	1.63459e-05	progastricsin (pepsinogen C)
83985	SPNS1	H	1.66521e-05	spinster homolog 1 (Drosophila)
8355	HIST1H3G	H	1.79201e-05	histone cluster 1, H3g
440387	CTRB2	H	1.80657e-05	chymotrypsinogen B2
10162	LPCAT3	H	1.8139e-05	lysophosphatidylcholine acyltransferase 3
1973	EIF4A1	L	1.88617e-05	eukaryotic translation initiation factor 4A1
353143	LCE3B	H	2.20361e-05	late cornified envelope 3B
8425	LTBP4	H	2.2452e-05	latent transforming growth factor beta binding protein 4
79643	CHMP6	H	2.2452e-05	chromatin modifying protein 6
83590	TMUB1	H	2.5175e-05	transmembrane and ubiquitin-like domain containing 1
22984	PDCD11	L	2.88501e-05	programmed cell death 11
11047	ADRM1	H	3.04516e-05	adhesion regulating molecule 1
11230	PRAF2	H	3.22193e-05	PRA1 domain family, member 2
339105	PRSS53	H	3.2559e-05	protease, serine, 53
22	ABCB7	L	3.26445e-05	ATP-binding cassette, sub-family B (MDR/TAP), member 7
402317	OR2A42	H	3.70543e-05	olfactory receptor, family 2, subfamily A, member 42
114879	OSBPL5	H	3.79819e-05	oxysterol binding protein-like 5
51070	NOSIP	H	3.86794e-05	nitric oxide synthase interacting protein
338692	ANKRD13D	H	4.0666e-05	ankyrin repeat domain 13 family, member D
2693	GHSR	H	4.08987e-05	growth hormone secretagogue receptor
11151	CORO1A	H	4.12178e-05	coronin, actin binding protein, 1A
26233	FBXL6	H	4.17549e-05	F-box and leucine-rich repeat protein 6
55336	FBXL8	H	4.26832e-05	F-box and leucine-rich repeat protein 8
10312	TCIRG1	H	4.50161e-05	T-cell, immune regulator 1, ATPase, H+ transporting, lysosomal V0 subunit A3
55658	RNF126	H	4.68969e-05	ring finger protein 126
6832	SUPV3L1	L	4.68969e-05	suppressor of var1, 3-like 1 (S. cerevisiae)
79652	TMEM204	H	4.93067e-05	transmembrane protein 204
1397	CRIP2	H	5.15029e-05	cysteine-rich protein 2
4504	MT3	H	5.31086e-05	metallothionein 3
4007	PRICKLE3	H	5.37229e-05	prickle homolog 3 (Drosophila)
2583	B4GALNT1	H	5.56511e-05	beta-1,4-N-acetyl-galactosaminyl transferase 1
84954	MPND	H	5.72601e-05	MPN domain containing
10811	NOXA1	H	6.3279e-05	NADPH oxidase activator 1
23237	ARC	H	6.45969e-05	activity-regulated cytoskeleton-associated protein
86	ACTL6A	L	6.58337e-05	actin-like 6A
10715	LASS1	H	6.58337e-05	LAG1 homolog, ceramide synthase 1
90007	MIDN	H	6.60003e-05	midnolin
84261	FBXW9	H	6.62509e-05	F-box and WD repeat domain containing 9
126961	HIST2H3C	H	6.70082e-05	histone cluster 2, H3c
25823	TPSG1	H	6.76883e-05	tryptase gamma 1
1412	CRYBA2	H	7.18173e-05	crystallin, beta A2
8358	HIST1H3B	H	7.55179e-05	histone cluster 1, H3b
79786	KLHL36	H	7.99964e-05	kelch-like 36 (Drosophila)
91252	SLC39A13	H	8.41986e-05	solute carrier family 39 (zinc transporter), member 13
129807	NEU4	H	8.56807e-05	sialidase 4
349667	RTN4RL2	H	8.63234e-05	reticulon 4 receptor-like 2
94086	HSPB9	H	8.68624e-05	heat shock protein, alpha-crystallin-related, B9
5025	P2RX4	H	8.71851e-05	purinergic receptor P2X, ligand-gated ion channel, 4
142678	MIB2	H	9.18591e-05	mindbomb homolog 2 (Drosophila)
1413	CRYBA4	H	9.39328e-05	crystallin, beta A4
55717	WDR11	L	9.42827e-05	WD repeat domain 11
84196	USP48	L	0.000101294	ubiquitin specific peptidase 48
342931	RFPL4A	H	0.000103059	ret finger protein-like 4A
140606	SELM	H	0.000107466	selenoprotein M
30834	ZNRD1	H	0.000109466	zinc ribbon domain containing 1
3007	HIST1H1D	H	0.000116962	histone cluster 1, H1d
28957	MRPS28	L	0.000129118	mitochondrial ribosomal protein S28
283234	CCDC88B	H	0.000131017	coiled-coil domain containing 88B
375775	PNPLA7	H	0.000134078	patatin-like phospholipase domain containing 7
20	ABCA2	H	0.000134078	ATP-binding cassette, sub-family A (ABC1), member 2
327	APEH	H	0.000134895	N-acylaminoacyl-peptide hydrolase
4904	YBX1	H	0.000135223	Y box binding protein 1
57140	RNPEPL1	H	0.000135881	arginyl aminopeptidase (aminopeptidase B)-like 1
2052	EPHX1	H	0.000144717	epoxide hydrolase 1, microsomal (xenobiotic)
10113	PREB	H	0.000153351	prolactin regulatory element binding
1464	CSPG4	H	0.000155209	chondroitin sulfate proteoglycan 4
11173	ADAMTS7	H	0.000155724	ADAM metallopeptidase with thrombospondin type 1 motif, 7
50846	DHH	H	0.000157468	desert hedgehog
50674	NEUROG3	H	0.000158228	neurogenin 3
566	AZU1	H	0.000159565	azurocidin 1
3183	HNRNPC	H	0.000162364	heterogeneous nuclear ribonucleoprotein C (C1/C2)
54555	DDX49	H	0.000165782	DEAD (Asp-Glu-Ala-Asp) box polypeptide 49
83547	RILP	H	0.000170045	Rab interacting lysosomal protein
79444	BIRC7	H	0.000171351	baculoviral IAP repeat containing 7
79734	KCTD17	H	0.000175419	potassium channel tetramerisation domain containing 17
27344	PCSK1N	H	0.000175744	proprotein convertase subtilisin/kexin type 1 inhibitor
5930	RBBP6	L	0.000175839	retinoblastoma binding protein 6
27335	EIF3K	H	0.000178165	eukaryotic translation initiation factor 3, subunit K
155066	ATP6V0E2	H	0.000184219	ATPase, H+ transporting V0 subunit e2
25820	ARIH1	H	0.000185984	ariadne homolog, ubiquitin-conjugating enzyme E2 binding protein, 1 (Drosophila)
83886	PRSS27	H	0.000192377	protease, serine 27
3316	HSPB2	H	0.000192516	heat shock 27kDa protein 2
23644	EDC4	H	0.000193204	enhancer of mRNA decapping 4
23113	CUL9	H	0.000201401	cullin 9
92799	SHKBP1	H	0.00020721	SH3KBP1 binding protein 1
10980	COPS6	H	0.000208194	COP9 constitutive photomorphogenic homolog subunit 6 (Arabidopsis)
55611	OTUB1	H	0.00020844	OTU domain, ubiquitin aldehyde binding 1
6239	RREB1	H	0.000220861	ras responsive element binding protein 1
90507	SCRN2	H	0.000222691	secernin 2
123099	DEGS2	H	0.000224007	degenerative spermatocyte homolog 2, lipid desaturase (Drosophila)
8351	HIST1H3D	H	0.000224829	histone cluster 1, H3d
30968	STOML2	H	0.000225065	stomatin (EPB72)-like 2
6522	SLC4A2	H	0.000233699	solute carrier family 4, anion exchanger, member 2 (erythrocyte membrane protein band 3-like 1)
29802	VPREB3	H	0.000243783	pre-B lymphocyte 3
9114	ATP6V0D1	H	0.000243783	ATPase, H+ transporting, lysosomal 38kDa, V0 subunit d1
80700	UBXN6	H	0.000244355	UBX domain protein 6
51127	TRIM17	H	0.000251039	tripartite motif containing 17
398	ARHGDIG	H	0.000252793	Rho GDP dissociation inhibitor (GDI) gamma
150274	HSCB	L	0.00026334	HscB iron-sulfur cluster co-chaperone homolog (E. coli)
253190	SERHL2	H	0.00026705	serine hydrolase-like 2
29988	SLC2A8	H	0.000288177	solute carrier family 2 (facilitated glucose transporter), member 8
8357	HIST1H3H	H	0.000294085	histone cluster 1, H3h
1417	CRYBB3	H	0.000296479	crystallin, beta B3
9546	APBA3	H	0.00029993	amyloid beta (A4) precursor protein-binding, family A, member 3
3487	IGFBP4	H	0.000302368	insulin-like growth factor binding protein 4
23149	FCHO1	H	0.000304473	FCH domain only 1
23640	HSPBP1	H	0.000311947	HSPA (heat shock 70kDa) binding protein, cytoplasmic cochaperone 1
129080	EMID1	H	0.000316295	EMI domain containing 1
6921	TCEB1	L	0.000327038	transcription elongation factor B (SIII), polypeptide 1 (15kDa, elongin C)
527	ATP6V0C	H	0.000337466	ATPase, H+ transporting, lysosomal 16kDa, V0 subunit c
3300	DNAJB2	H	0.000347957	DnaJ (Hsp40) homolog, subfamily B, member 2
256949	KANK3	H	0.000370969	KN motif and ankyrin repeat domains 3
10920	COPS8	H	0.000381695	COP9 constitutive photomorphogenic homolog subunit 8 (Arabidopsis)
432	ASGR1	H	0.000386066	asialoglycoprotein receptor 1
26519	TIMM10	H	0.000387386	translocase of inner mitochondrial membrane 10 homolog (yeast)
124975	GGT6	H	0.000403105	gamma-glutamyltransferase 6
28988	DBNL	H	0.000419894	drebrin-like
8314	BAP1	L	0.000423712	BRCA1 associated protein-1 (ubiquitin carboxy-terminal hydrolase)
56931	DUS3L	H	0.000429836	dihydrouridine synthase 3-like (S. cerevisiae)
60681	FKBP10	H	0.000447817	FK506 binding protein 10, 65 kDa
537	ATP6AP1	H	0.000449333	ATPase, H+ transporting, lysosomal accessory protein 1
6449	SGTA	H	0.00046791	small glutamine-rich tetratricopeptide repeat (TPR)-containing, alpha
1421	CRYGD	H	0.000477465	crystallin, gamma D
9984	THOC1	L	0.000478538	THO complex 1
8557	TCAP	H	0.000495369	titin-cap (telethonin)
388323	GLTPD2	H	0.000507233	glycolipid transfer protein domain containing 2
10383	TUBB2C	H	0.00052043	tubulin, beta 2C
3982	LIM2	H	0.000525095	lens intrinsic membrane protein 2, 19kDa
84619	ZGPAT	H	0.000535733	zinc finger, CCCH-type with G patch domain
26086	GPSM1	H	0.000554527	G-protein signaling modulator 1
117166	WFIKKN1	H	0.000570129	WAP, follistatin/kazal, immunoglobulin, kunitz and netrin domain containing 1
10523	CHERP	L	0.000570129	calcium homeostasis endoplasmic reticulum protein
359	AQP2	H	0.00058939	aquaporin 2 (collecting duct)
5657	PRTN3	H	0.000603899	proteinase 3
7780	SLC30A2	H	0.000626285	solute carrier family 30 (zinc transporter), member 2
8968	HIST1H3F	H	0.000634616	histone cluster 1, H3f
3013	HIST1H2AD	H	0.000648707	histone cluster 1, H2ad
116519	APOA5	H	0.000650156	apolipoprotein A-V
57661	PHRF1	H	0.000663862	PHD and ring finger domains 1
374977	HEATR8	H	0.00067642	HEAT repeat containing 8
493829	TRIM72	H	0.000692082	tripartite motif containing 72
10616	RBCK1	H	0.000695877	RanBP-type and C3HC4-type zinc finger containing 1
3995	FADS3	H	0.000725358	fatty acid desaturase 3
10755	GIPC1	H	0.000747819	GIPC PDZ domain containing family, member 1
255189	PLA2G4F	H	0.000775961	phospholipase A2, group IVF
201176	ARHGAP27	H	0.000780867	Rho GTPase activating protein 27
23436	CELA3B	H	0.000784423	chymotrypsin-like elastase family, member 3B
57332	CBX8	H	0.000799006	chromobox homolog 8
22872	SEC31A	L	0.000801605	SEC31 homolog A (S. cerevisiae)
164592	CCDC116	H	0.000810327	coiled-coil domain containing 116
23595	ORC3	L	0.000821796	origin recognition complex, subunit 3
4123	MAN2C1	H	0.000824465	mannosidase, alpha, class 2C, member 1
360200	TMPRSS9	H	0.000837022	transmembrane protease, serine 9
23523	CABIN1	L	0.000859889	calcineurin binding protein 1
10130	PDIA6	L	0.000864532	protein disulfide isomerase family A, member 6
50861	STMN3	H	0.000872946	stathmin-like 3
11180	WDR6	H	0.00090058	WD repeat domain 6
14	AAMP	H	0.000906398	angio-associated, migratory cell protein
11260	XPOT	L	0.000944059	exportin, tRNA (nuclear export receptor for tRNAs)
7403	KDM6A	H	0.00094507	lysine (K)-specific demethylase 6A
3336	HSPE1	L	0.000988421	heat shock 10kDa protein 1 (chaperonin 10)
10146	G3BP1	L	0.00103251	GTPase activating protein (SH3 domain) binding protein 1
8969	HIST1H2AG	H	0.00105467	histone cluster 1, H2ag
23498	HAAO	H	0.00106592	3-hydroxyanthranilate 3,4-dioxygenase
8662	EIF3B	L	0.00107272	eukaryotic translation initiation factor 3, subunit B
4000	LMNA	H	0.00108663	lamin A/C
55898	UNC45A	H	0.00110557	unc-45 homolog A (C. elegans)
55858	TMEM165	H	0.00111437	transmembrane protein 165
201255	LRRC45	H	0.00118463	leucine rich repeat containing 45
57462	KIAA1161	H	0.00118463	KIAA1161
148014	TTC9B	H	0.00118587	tetratricopeptide repeat domain 9B
3991	LIPE	H	0.00120219	lipase, hormone-sensitive
90864	SPSB3	H	0.00120345	splA/ryanodine receptor domain and SOCS box containing 3
2248	FGF3	H	0.00121488	fibroblast growth factor 3
9276	COPB2	L	0.00122898	coatomer protein complex, subunit beta 2 (beta prime)
10277	UBE4B	L	0.00123933	ubiquitination factor E4B (UFD2 homolog, yeast)
57599	WDR48	L	0.00125896	WD repeat domain 48
54849	DEF8	H	0.0012722	differentially expressed in FDCP 8 homolog (mouse)
10548	TM9SF1	H	0.00129772	transmembrane 9 superfamily member 1
347735	SERINC2	H	0.00130451	serine incorporator 2
7136	TNNI2	H	0.00136005	troponin I type 2 (skeletal, fast)
126792	B3GALT6	H	0.00138287	UDP-Gal:betaGal beta 1,3-galactosyltransferase polypeptide 6
8334	HIST1H2AC	H	0.001396	histone cluster 1, H2ac
163	AP2B1	H	0.00140604	adaptor-related protein complex 2, beta 1 subunit
3004	GZMM	H	0.00141042	granzyme M (lymphocyte met-ase 1)
165	AEBP1	H	0.00151325	AE binding protein 1
79176	FBXL15	H	0.00159444	F-box and leucine-rich repeat protein 15
9375	TM9SF2	L	0.00160142	transmembrane 9 superfamily member 2
200312	RNF215	H	0.00160306	ring finger protein 215
337	APOA4	H	0.0016246	apolipoprotein A-IV
10054	UBA2	H	0.00164472	ubiquitin-like modifier activating enzyme 2
8330	HIST1H2AK	H	0.00166964	histone cluster 1, H2ak
10043	TOM1	H	0.0016775	target of myb1 (chicken)
10513	APPBP2	L	0.00171696	amyloid beta precursor protein (cytoplasmic tail) binding protein 2
23526	HMHA1	H	0.00172047	histocompatibility (minor) HA-1
140825	NEURL2	H	0.00173458	neuralized homolog 2 (Drosophila)
84179	MFSD7	H	0.00174702	major facilitator superfamily domain containing 7
10131	TRAP1	H	0.0017488	TNF receptor-associated protein 1
23420	NOMO1	H	0.0017488	NODAL modulator 1
203074	PRSS55	H	0.00185514	protease, serine, 55
6396	SEC13	L	0.00186647	SEC13 homolog (S. cerevisiae)
51588	PIAS4	H	0.00197535	protein inhibitor of activated STAT, 4
8078	USP5	H	0.00201156	ubiquitin specific peptidase 5 (isopeptidase T)
374654	KIF7	H	0.00202173	kinesin family member 7
5017	OVOL1	H	0.00202706	ovo-like 1(Drosophila)
162	AP1B1	H	0.00204221	adaptor-related protein complex 1, beta 1 subunit
260429	PRSS33	H	0.00205045	protease, serine, 33
7841	MOGS	H	0.0021069	mannosyl-oligosaccharide glucosidase
55192	DNAJC17	H	0.00211326	DnaJ (Hsp40) homolog, subfamily C, member 17
116285	ACSM1	H	0.00213887	acyl-CoA synthetase medium-chain family member 1
55182	RNF220	H	0.00215827	ring finger protein 220
81559	TRIM11	H	0.00218001	tripartite motif containing 11
23423	TMED3	H	0.00221079	transmembrane emp24 protein transport domain containing 3
10072	DPP3	H	0.00223525	dipeptidyl-peptidase 3
2767	GNA11	H	0.0022442	guanine nucleotide binding protein (G protein), alpha 11 (Gq class)
402	ARL2	H	0.00226447	ADP-ribosylation factor-like 2
4224	MEP1A	H	0.002269	meprin A, alpha (PABA peptide hydrolase)
11332	ACOT7	H	0.00240395	acyl-CoA thioesterase 7
148066	ZNRF4	H	0.00240873	zinc and ring finger 4
10422	UBAC1	H	0.0024546	UBA domain containing 1
79879	CCDC134	H	0.00254621	coiled-coil domain containing 134
143570	XRRA1	H	0.00255377	X-ray radiation resistance associated 1
66005	CHID1	H	0.00258934	chitinase domain containing 1
22977	AKR7A3	H	0.0026712	aldo-keto reductase family 7, member A3 (aflatoxin aldehyde reductase)
26168	SENP3	H	0.00275508	SUMO1/sentrin/SMT3 specific peptidase 3
1521	CTSW	H	0.00277408	cathepsin W
64843	ISL2	H	0.00277953	ISL LIM homeobox 2
386676	KRTAP10-9	H	0.0028152	keratin associated protein 10-9
5222	PGA5	H	0.00283235	pepsinogen 5, group I (pepsinogen A)
23060	ZNF609	L	0.0028878	zinc finger protein 609
116835	HSPA12B	H	0.00289345	heat shock 70kD protein 12B
1603	DAD1	H	0.00296499	defender against cell death 1
54760	PCSK4	H	0.00297368	proprotein convertase subtilisin/kexin type 4
10612	TRIM3	H	0.00297949	tripartite motif containing 3
79622	SNRNP25	H	0.00298822	small nuclear ribonucleoprotein 25kDa (U11/U12)
53347	UBASH3A	H	0.00303814	ubiquitin associated and SH3 domain containing A
55643	BTBD2	H	0.00305	BTB (POZ) domain containing 2
10421	CD2BP2	H	0.00305	CD2 (cytoplasmic tail) binding protein 2
29927	SEC61A1	L	0.00312202	Sec61 alpha 1 subunit (S. cerevisiae)
9352	TXNL1	H	0.0031991	thioredoxin-like 1
26063	DECR2	H	0.00324237	2,4-dienoyl CoA reductase 2, peroxisomal
161	AP2A2	H	0.00326126	adaptor-related protein complex 2, alpha 2 subunit
150209	AIFM3	H	0.00326441	apoptosis-inducing factor, mitochondrion-associated, 3
9973	CCS	H	0.00331211	copper chaperone for superoxide dismutase
23181	DIP2A	H	0.00344906	DIP2 disco-interacting protein 2 homolog A (Drosophila)
28956	LAMTOR2	H	0.00349248	late endosomal/lysosomal adaptor, MAPK and MTOR activator 2
4597	MVD	H	0.0035398	mevalonate (diphospho) decarboxylase
363	AQP6	H	0.00359459	aquaporin 6, kidney specific
85235	HIST1H2AH	H	0.00361533	histone cluster 1, H2ah
8347	HIST1H2BC	H	0.00363619	histone cluster 1, H2bc
11075	STMN2	H	0.00364316	stathmin-like 2
126129	CPT1C	H	0.00368174	carnitine palmitoyltransferase 1C
130617	ZFAND2B	H	0.00369233	zinc finger, AN1-type domain 2B
79982	DNAJB14	H	0.0037207	DnaJ (Hsp40) homolog, subfamily B, member 14
125981	ACER1	H	0.0037207	alkaline ceramidase 1
114882	OSBPL8	L	0.00375644	oxysterol binding protein-like 8
10910	SUGT1	L	0.00378164	SGT1, suppressor of G2 allele of SKP1 (S. cerevisiae)
257364	SNX33	H	0.00378428	sorting nexin 33
146894	CD300LG	H	0.00381427	CD300 molecule-like family member g
388591	RNF207	H	0.00397371	ring finger protein 207
57799	RAB40C	H	0.00397749	RAB40C, member RAS oncogene family
26231	LRRC29	H	0.00398506	leucine rich repeat containing 29
5861	RAB1A	L	0.00402309	RAB1A, member RAS oncogene family
199720	GGN	H	0.00403457	gametogenetin
345	APOC3	H	0.00406531	apolipoprotein C-III
164656	TMPRSS6	H	0.0041944	transmembrane protease, serine 6
79791	FBXO31	H	0.00433945	F-box protein 31
60626	RIC8A	H	0.00434764	resistance to inhibitors of cholinesterase 8 homolog A (C. elegans)
8345	HIST1H2BH	H	0.00437229	histone cluster 1, H2bh
93210	PGAP3	H	0.0043888	post-GPI attachment to proteins 3
25879	DCAF13	L	0.00440951	DDB1 and CUL4 associated factor 13
151258	SLC38A11	L	0.00443031	solute carrier family 38, member 11
54476	RNF216	H	0.00445539	ring finger protein 216
4628	MYH10	L	0.0045314	myosin, heavy chain 10, non-muscle
64174	DPEP2	H	0.004557	dipeptidase 2
22948	CCT5	H	0.00466944	chaperonin containing TCP1, subunit 5 (epsilon)
55509	BATF3	H	0.00470453	basic leucine zipper transcription factor, ATF-like 3
149041	RC3H1	L	0.00473101	ring finger and CCCH-type domains 1
10858	CYP46A1	H	0.00482476	cytochrome P450, family 46, subfamily A, polypeptide 1
9632	SEC24C	H	0.00489275	SEC24 family, member C (S. cerevisiae)
124460	SNX20	H	0.00499403	sorting nexin 20
27429	HTRA2	H	0.00499868	HtrA serine peptidase 2
3852	KRT5	H	0.00500333	keratin 5
8344	HIST1H2BE	H	0.00504069	histone cluster 1, H2be
25864	ABHD14A	H	0.00507359	abhydrolase domain containing 14A
28952	CCDC22	H	0.00508396	coiled-coil domain containing 22
79913	ACTR5	H	0.00515908	ARP5 actin-related protein 5 homolog (yeast)
253314	EIF4E1B	H	0.0054134	eukaryotic translation initiation factor 4E family member 1B
54542	RC3H2	L	0.0054134	ring finger and CCCH-type domains 2
91107	TRIM47	H	0.0055601	tripartite motif containing 47
81605	URM1	H	0.00559604	ubiquitin related modifier 1
389812	LCN15	H	0.00563738	lipocalin 15
10960	LMAN2	H	0.00565295	lectin, mannose-binding 2
372	ARCN1	L	0.00587506	archain 1
9476	NAPSA	H	0.00587506	napsin A aspartic peptidase
2217	FCGRT	H	0.00598356	Fc fragment of IgG, receptor, transporter, alpha
30844	EHD4	H	0.00598356	EH-domain containing 4
9622	KLK4	H	0.00604953	kallikrein-related peptidase 4
10307	APBB3	H	0.00608276	amyloid beta (A4) precursor protein-binding, family B, member 3
348378	FAM159A	H	0.00608831	family with sequence similarity 159, member A
80352	RNF39	H	0.0061385	ring finger protein 39
10908	PNPLA6	H	0.00617217	patatin-like phospholipase domain containing 6
8837	CFLAR	L	0.00618343	CASP8 and FADD-like apoptosis regulator
54461	FBXW5	H	0.00621732	F-box and WD repeat domain containing 5
2286	FKBP2	H	0.00638929	FK506 binding protein 2, 13kDa
9373	PLAA	L	0.00643003	phospholipase A2-activating protein
56606	SLC2A9	H	0.00652994	solute carrier family 2 (facilitated glucose transporter), member 9
4689	NCF4	H	0.00652994	neutrophil cytosolic factor 4, 40kDa
168620	BHLHA15	H	0.00652994	basic helix-loop-helix family, member a15
43847	KLK14	H	0.00655308	kallikrein-related peptidase 14
404093	CUEDC1	H	0.00663725	CUE domain containing 1
26517	TIMM13	H	0.00664927	translocase of inner mitochondrial membrane 13 homolog (yeast)
54546	RNF186	H	0.00666131	ring finger protein 186
152518	NFXL1	L	0.00670966	nuclear transcription factor, X-box binding-like 1
84206	MEX3B	H	0.00685663	mex-3 homolog B (C. elegans)
1155	TBCB	H	0.00689382	tubulin folding cofactor B
10559	SLC35A1	H	0.00708887	solute carrier family 35 (CMP-sialic acid transporter), member A1
10003	NAALAD2	L	0.00710162	N-acetylated alpha-linked acidic dipeptidase 2
30819	KCNIP2	H	0.00714642	Kv channel interacting protein 2
5699	PSMB10	H	0.00717857	proteasome (prosome, macropain) subunit, beta type, 10
346528	OR2A1	H	0.00724327	olfactory receptor, family 2, subfamily A, member 1
338917	VSX2	H	0.00727114	visual system homeobox 2
515	ATP5F1	L	0.00730848	ATP synthase, H+ transporting, mitochondrial Fo complex, subunit B1
340359	KLHL38	H	0.00731503	kelch-like 38 (Drosophila)
27338	UBE2S	H	0.00734129	ubiquitin-conjugating enzyme E2S
9355	LHX2	H	0.00741393	LIM homeobox 2
80128	TRIM46	H	0.00746645	tripartite motif containing 46
5977	DPF2	H	0.00758142	D4, zinc and double PHD fingers family 2
617	BCS1L	H	0.00772472	BCS1-like (S. cerevisiae)
54793	KCTD9	L	0.0077592	potassium channel tetramerisation domain containing 9
80331	DNAJC5	H	0.00779381	DnaJ (Hsp40) homolog, subfamily C, member 5
10768	AHCYL1	L	0.0078425	adenosylhomocysteinase-like 1
23203	PMPCA	H	0.00786345	peptidase (mitochondrial processing) alpha
56928	SPPL2B	H	0.00794776	signal peptide peptidase-like 2B
389668	XKR9	L	0.00798313	XK, Kell blood group complex subunit-related family, member 9
158866	ZDHHC15	H	0.00801152	zinc finger, DHHC-type containing 15
257240	KLHL34	H	0.00827848	kelch-like 34 (Drosophila)
375593	TRIM73	H	0.00831662	tripartite motif containing 73
84219	WDR24	H	0.00844842	WD repeat domain 24
94103	ORMDL3	H	0.00858358	ORM1-like 3 (S. cerevisiae)
23248	RPRD2	L	0.00859872	regulation of nuclear pre-mRNA domain containing 2
92591	ASB16	H	0.00861388	ankyrin repeat and SOCS box containing 16
51377	UCHL5	H	0.00862906	ubiquitin carboxyl-terminal hydrolase L5
3430	IFI35	H	0.00865189	interferon-induced protein 35
643847	PGA4	H	0.00874816	pepsinogen 4, group I (pepsinogen A)
11041	B3GNT1	H	0.0087514	UDP-GlcNAc:betaGal beta-1,3-N-acetylglucosaminyltransferase 1
2865	FFAR3	H	0.0088191	free fatty acid receptor 3
23646	PLD3	H	0.00882865	phospholipase D family, member 3
3921	RPSA	L	0.00893782	ribosomal protein SA
54494	C11orf71	H	0.00894566	chromosome 11 open reading frame 71
1154	CISH	H	0.00895351	cytokine inducible SH2-containing protein
196403	DTX3	H	0.00895351	deltex homolog 3 (Drosophila)
22836	RHOBTB3	L	0.00915177	Rho-related BTB domain containing 3
7791	ZYX	H	0.00915177	zyxin
286256	LCN12	H	0.00915177	lipocalin 12
64431	ACTR6	L	0.0092726	ARP6 actin-related protein 6 homolog (yeast)
6729	SRP54	L	0.00929693	signal recognition particle 54kDa
254863	C17orf61	H	0.00941125	chromosome 17 open reading frame 61
11330	CTRC	H	0.00954878	chymotrypsin C (caldecrin)
164118	TTC24	H	0.00966046	tetratricopeptide repeat domain 24
10087	COL4A3BP	L	0.0096857	collagen, type IV, alpha 3 (Goodpasture antigen) binding protein
64601	VPS16	H	0.00973636	vacuolar protein sorting 16 homolog (S. cerevisiae)
128240	APOA1BP	H	0.00973636	apolipoprotein A-I binding protein
9919	SEC16A	L	0.00981279	SEC16 homolog A (S. cerevisiae)
59286	UBL5	H	0.00995862	ubiquitin-like 5
79901	CYBRD1	L	0.0100019	cytochrome b reductase 1
283849	EXOC3L1	H	0.0102561	exocyst complex component 3-like 1
64211	LHX5	H	0.0102827	LIM homeobox 5
26001	RNF167	H	0.0103183	ring finger protein 167
440689	HIST2H2BF	H	0.0103272	histone cluster 2, H2bf
79654	HECTD3	H	0.0103719	HECT domain containing 3
1409	CRYAA	H	0.0103808	crystallin, alpha A
9322	TRIP10	H	0.0105432	thyroid hormone receptor interactor 10
4037	LRP3	H	0.0105432	low density lipoprotein receptor-related protein 3
64714	PDIA2	H	0.0105711	protein disulfide isomerase family A, member 2
4868	NPHS1	L	0.0106344	nephrosis 1, congenital, Finnish type (nephrin)
378108	TRIM74	H	0.0106551	tripartite motif containing 74
26235	FBXL4	L	0.0107356	F-box and leucine-rich repeat protein 4
26100	WIPI2	H	0.0107725	WD repeat domain, phosphoinositide interacting 2
115825	WDFY2	L	0.0107911	WD repeat and FYVE domain containing 2
147700	KLC3	H	0.010931	kinesin light chain 3
339	APOBEC1	H	0.0110063	apolipoprotein B mRNA editing enzyme, catalytic polypeptide 1
9784	SNX17	H	0.011082	sorting nexin 17
196743	PAOX	H	0.0111391	polyamine oxidase (exo-N4-amino)
388581	FAM132A	H	0.0111487	family with sequence similarity 132, member A
168002	DACT2	H	0.0112253	dapper, antagonist of beta-catenin, homolog 2 (Xenopus laevis)
84971	ATG4D	H	0.0113507	ATG4 autophagy related 4 homolog D (S. cerevisiae)
1315	COPB1	L	0.0114091	coatomer protein complex, subunit beta 1
54442	KCTD5	H	0.011418	potassium channel tetramerisation domain containing 5
9427	ECEL1	H	0.0114873	endothelin converting enzyme-like 1
124930	ANKRD13B	H	0.0114873	ankyrin repeat domain 13B
83714	NRIP2	H	0.0116253	nuclear receptor interacting protein 2
91544	UBXN11	H	0.0118551	UBX domain protein 11
57192	MCOLN1	H	0.0118854	mucolipin 1
11267	SNF8	H	0.0119868	SNF8, ESCRT-II complex subunit, homolog (S. cerevisiae)
8266	UBL4A	H	0.0120276	ubiquitin-like 4A
1361	CPB2	L	0.0121096	carboxypeptidase B2 (plasma)
7639	ZNF85	L	0.0121301	zinc finger protein 85
79065	ATG9A	H	0.0121713	ATG9 autophagy related 9 homolog A (S. cerevisiae)
1415	CRYBB2	H	0.012192	crystallin, beta B2
7178	TPT1	H	0.0122438	tumor protein, translationally-controlled 1
57644	MYH7B	H	0.0122749	myosin, heavy chain 7B, cardiac muscle, beta
5184	PEPD	H	0.0123793	peptidase D
10874	NMU	L	0.0124213	neuromedin U
8864	PER2	H	0.0125056	period homolog 2 (Drosophila)
23196	FAM120A	H	0.0125056	family with sequence similarity 120A
151835	CPNE9	H	0.0125904	copine family member IX
23510	KCTD2	H	0.0126117	potassium channel tetramerisation domain containing 2
10471	PFDN6	H	0.0126117	prefoldin subunit 6
260434	PYDC1	H	0.0126757	PYD (pyrin domain) containing 1
3996	LLGL1	H	0.0127186	lethal giant larvae homolog 1 (Drosophila)
8343	HIST1H2BF	H	0.0127293	histone cluster 1, H2bf
118491	TTC18	L	0.0131542	tetratricopeptide repeat domain 18
115273	RAB42	H	0.013254	RAB42, member RAS oncogene family
5007	OSBP	H	0.0133994	oxysterol binding protein
1420	CRYGC	H	0.013467	crystallin, gamma C
6650	SOLH	H	0.0136258	small optic lobes homolog (Drosophila)
3093	UBE2K	L	0.0136944	ubiquitin-conjugating enzyme E2K (UBC1 homolog, yeast)
132158	GLYCTK	H	0.0139384	glycerate kinase
3026	HABP2	H	0.0141123	hyaluronan binding protein 2
29785	CYP2S1	H	0.0141594	cytochrome P450, family 2, subfamily S, polypeptide 1
7965	AIMP2	H	0.014445	aminoacyl tRNA synthetase complex-interacting multifunctional protein 2
6448	SGSH	H	0.0146018	N-sulfoglucosamine sulfohydrolase
55128	TRIM68	H	0.0148092	tripartite motif containing 68
101	ADAM8	H	0.01532	ADAM metallopeptidase domain 8
3329	HSPD1	L	0.0154342	heat shock 60kDa protein 1 (chaperonin)
43849	KLK12	H	0.0154979	kallikrein-related peptidase 12
51133	KCTD3	L	0.0156133	potassium channel tetramerisation domain containing 3
122618	PLD4	H	0.0157294	phospholipase D family, member 4
23466	CBX6	H	0.0157423	chromobox homolog 6
827	CAPN6	H	0.0157553	calpain 6
11070	TMEM115	H	0.0158332	transmembrane protein 115
3280	HES1	H	0.0158984	hairy and enhancer of split 1, (Drosophila)
10136	CELA3A	H	0.0160469	chymotrypsin-like elastase family, member 3A
399665	FAM102A	H	0.0160559	family with sequence similarity 102, member A
10484	SEC23A	L	0.0160822	Sec23 homolog A (S. cerevisiae)
146547	PRSS36	H	0.0161087	protease, serine, 36
10753	CAPN9	H	0.0162946	calpain 9
1201	CLN3	H	0.0164825	ceroid-lipofuscinosis, neuronal 3
1186	CLCN7	H	0.0164825	chloride channel 7
57558	USP35	H	0.0165365	ubiquitin specific peptidase 35
9530	BAG4	L	0.0165365	BCL2-associated athanogene 4
10330	CNPY2	H	0.0166586	canopy 2 homolog (zebrafish)
282808	RAB40AL	H	0.0168226	RAB40A, member RAS oncogene family-like
522	ATP5J	L	0.0170575	ATP synthase, H+ transporting, mitochondrial Fo complex, subunit F6
25839	COG4	H	0.017183	component of oligomeric golgi complex 4
79156	PLEKHF1	H	0.0173092	pleckstrin homology domain containing, family F (with FYVE domain) member 1
3337	DNAJB1	H	0.0173374	DnaJ (Hsp40) homolog, subfamily B, member 1
27163	NAAA	H	0.0174222	N-acylethanolamine acid amidase
3550	IK	H	0.0175215	IK cytokine, down-regulator of HLA II
1747	DLX3	H	0.0178226	distal-less homeobox 3
81572	PDRG1	H	0.017953	p53 and DNA-damage regulated 1
54896	PQLC2	H	0.0180258	PQ loop repeat containing 2
151056	PLB1	L	0.0183788	phospholipase B1
22878	TRAPPC8	L	0.0184532	trafficking protein particle complex 8
7295	TXN	H	0.0184681	thioredoxin
158506	ZNF645	L	0.0184681	zinc finger protein 645
22818	COPZ1	L	0.0188438	coatomer protein complex, subunit zeta 1
339451	KLHL17	H	0.0189808	kelch-like 17 (Drosophila)
54620	FBXL19	H	0.0190113	F-box and leucine-rich repeat protein 19
23468	CBX5	L	0.0191339	chromobox homolog 5
22838	RNF44	H	0.0191955	ring finger protein 44
221421	RSPH9	H	0.0192263	radial spoke head 9 homolog (Chlamydomonas)
23403	FBXO46	H	0.0192418	F-box protein 46
51504	TRMT112	H	0.0194279	tRNA methyltransferase 11-2 homolog (S. cerevisiae)
342898	SYCN	H	0.0196863	syncollin
1975	EIF4B	L	0.0201077	eukaryotic translation initiation factor 4B
11059	WWP1	L	0.0202526	WW domain containing E3 ubiquitin protein ligase 1
344838	PAQR9	H	0.020431	progestin and adipoQ receptor family member IX
79922	MRM1	H	0.0204798	mitochondrial rRNA methyltransferase 1 homolog (S. cerevisiae)
127435	PODN	H	0.0206435	podocan
55154	MSTO1	H	0.0206725	misato homolog 1 (Drosophila)
219743	TYSND1	H	0.0206725	trypsin domain containing 1
3549	IHH	H	0.0206928	Indian hedgehog
146691	TOM1L2	H	0.0208579	target of myb1-like 2 (chicken)
10948	STARD3	H	0.0208911	StAR-related lipid transfer (START) domain containing 3
1173	AP2M1	H	0.0209077	adaptor-related protein complex 2, mu 1 subunit
222658	KCTD20	L	0.0209243	potassium channel tetramerisation domain containing 20
54858	PGPEP1	H	0.0210576	pyroglutamyl-peptidase I
254122	SNX32	H	0.0211916	sorting nexin 32
11045	UPK1A	H	0.021462	uroplakin 1A
653598	PPIAL4C	H	0.0215986	peptidylprolyl isomerase A (cyclophilin A)-like 4C
4185	ADAM11	H	0.0217696	ADAM metallopeptidase domain 11
9684	LRRC14	H	0.0217696	leucine rich repeat containing 14
5190	PEX6	H	0.0219422	peroxisomal biogenesis factor 6
131377	KBTBD5	H	0.0220463	kelch repeat and BTB (POZ) domain containing 5
1211	CLTA	H	0.0220812	clathrin, light chain A
84958	SYTL1	H	0.0222734	synaptotagmin-like 1
51182	HSPA14	L	0.0223938	heat shock 70kDa protein 14
9361	LONP1	H	0.022538	lon peptidase 1, mitochondrial
84836	ABHD14B	H	0.0228052	abhydrolase domain containing 14B
3270	HRC	H	0.0228231	histidine rich calcium binding protein
2170	FABP3	H	0.0229309	fatty acid binding protein 3, muscle and heart (mammary-derived growth inhibitor)
255738	PCSK9	H	0.0235314	proprotein convertase subtilisin/kexin type 9
11282	MGAT4B	H	0.0235867	mannosyl (alpha-1,3-)-glycoprotein beta-1,4-N-acetylglucosaminyltransferase, isozyme B
7064	THOP1	H	0.0235867	thimet oligopeptidase 1
309	ANXA6	H	0.0236236	annexin A6
80162	ATHL1	H	0.0236605	ATH1, acid trehalase-like 1 (yeast)
10382	TUBB4	H	0.0238461	tubulin, beta 4
23478	SEC11A	H	0.0238647	SEC11 homolog A (S. cerevisiae)
253980	KCTD13	H	0.0239767	potassium channel tetramerisation domain containing 13
9507	ADAMTS4	H	0.0239954	ADAM metallopeptidase with thrombospondin type 1 motif, 4
27440	CECR5	H	0.0240892	cat eye syndrome chromosome region, candidate 5
26973	CHORDC1	L	0.0241456	cysteine and histidine-rich domain (CHORD) containing 1
246330	PELI3	H	0.0242587	pellino homolog 3 (Drosophila)
23545	ATP6V0A2	H	0.0243533	ATPase, H+ transporting, lysosomal V0 subunit a2
4650	MYO9B	H	0.0247351	myosin IXB
7782	SLC30A4	L	0.0247928	solute carrier family 30 (zinc transporter), member 4
3638	INSIG1	L	0.0249085	insulin induced gene 1
51296	SLC15A3	H	0.025337	solute carrier family 15, member 3
10179	RBM7	H	0.0254944	RNA binding motif protein 7
285381	DPH3	L	0.0255932	DPH3, KTI11 homolog (S. cerevisiae)
401541	CENPP	H	0.0256526	centromere protein P
51257	MARCH2	H	0.0258317	membrane-associated ring finger (C3HC4) 2
54469	ZFAND6	L	0.0258716	zinc finger, AN1-type domain 6
10462	CLEC10A	H	0.0263752	C-type lectin domain family 10, member A
2800	GOLGA1	H	0.0264159	golgin A1
4762	NEUROG1	H	0.0267637	neurogenin 1
11174	ADAMTS6	L	0.0268667	ADAM metallopeptidase with thrombospondin type 1 motif, 6
79595	SAP130	L	0.0268667	Sin3A-associated protein, 130kDa
5913	RAPSN	H	0.0270738	receptor-associated protein of the synapse
10743	RAI1	H	0.0272404	retinoic acid induced 1
23562	CLDN14	H	0.027661	claudin 14
377007	KLHL30	H	0.0280657	kelch-like 30 (Drosophila)
57003	CCDC47	L	0.02813	coiled-coil domain containing 47
8906	AP1G2	H	0.028173	adaptor-related protein complex 1, gamma 2 subunit
54187	NANS	H	0.0283023	N-acetylneuraminic acid synthase
114881	OSBPL7	H	0.0284537	oxysterol binding protein-like 7
6166	RPL36AL	H	0.0287588	ribosomal protein L36a-like
89910	UBE3B	H	0.0287588	ubiquitin protein ligase E3B
10899	JTB	H	0.0289784	jumping translocation breakpoint
158833	AWAT1	H	0.0290445	acyl-CoA wax alcohol acyltransferase 1
26043	UBXN7	L	0.0291772	UBX domain protein 7
1572	CYP2F1	H	0.0292882	cytochrome P450, family 2, subfamily F, polypeptide 1
138065	RNF183	H	0.0293773	ring finger protein 183
54982	CLN6	H	0.0295785	ceroid-lipofuscinosis, neuronal 6, late infantile, variant
23457	ABCB9	H	0.0297584	ATP-binding cassette, sub-family B (MDR/TAP), member 9
55840	EAF2	H	0.0298035	ELL associated factor 2
84993	UBL7	H	0.0300227	ubiquitin-like 7 (bone marrow stromal cell-derived)
2077	ERF	H	0.0300299	Ets2 repressor factor
23513	SCRIB	H	0.0303036	scribbled homolog (Drosophila)
8189	SYMPK	H	0.0306718	symplekin
10531	PITRM1	H	0.0307181	pitrilysin metallopeptidase 1
55727	BTBD7	H	0.0307413	BTB (POZ) domain containing 7
9903	KLHL21	H	0.0310439	kelch-like 21 (Drosophila)
4796	TONSL	H	0.0311059	tonsoku-like, DNA repair protein
51035	UBXN1	H	0.0311375	UBX domain protein 1
284366	KLK9	H	0.0313962	kallikrein-related peptidase 9
22871	NLGN1	L	0.0315618	neuroligin 1
170575	GIMAP1	H	0.0316093	GTPase, IMAP family member 1
1891	ECH1	H	0.0316093	enoyl CoA hydratase 1, peroxisomal
533	ATP6V0B	H	0.0316568	ATPase, H+ transporting, lysosomal 21kDa, V0 subunit b
2281	FKBP1B	H	0.0316568	FK506 binding protein 1B, 12.6 kDa
9898	UBAP2L	H	0.0318952	ubiquitin associated protein 2-like
10427	SEC24B	L	0.0319671	SEC24 family, member B (S. cerevisiae)
83887	TTLL2	L	0.032015	tubulin tyrosine ligase-like family, member 2
23431	AP4E1	L	0.0320871	adaptor-related protein complex 4, epsilon 1 subunit
10067	SCAMP3	H	0.0321834	secretory carrier membrane protein 3
4493	MT1E	H	0.0323284	metallothionein 1E
10565	ARFGEF1	L	0.0327665	ADP-ribosylation factor guanine nucleotide-exchange factor 1(brefeldin A-inhibited)
219333	USP12	L	0.0327665	ubiquitin specific peptidase 12
11132	CAPN10	H	0.0329137	calpain 10
399664	MEX3D	H	0.0329137	mex-3 homolog D (C. elegans)
11335	CBX3	L	0.0329383	chromobox homolog 3
128637	TBC1D20	H	0.0331602	TBC1 domain family, member 20
335	APOA1	H	0.0332593	apolipoprotein A-I
10477	UBE2E3	H	0.0333586	ubiquitin-conjugating enzyme E2E 3 (UBC4/5 homolog, yeast)
407	ARR3	H	0.0333835	arrestin 3, retinal (X-arrestin)
150726	FBXO41	H	0.0337584	F-box protein 41
10004	NAALADL1	H	0.0337584	N-acetylated alpha-linked acidic dipeptidase-like 1
284325	C19orf54	H	0.0339599	chromosome 19 open reading frame 54
113178	SCAMP4	H	0.0342639	secretory carrier membrane protein 4
2079	ERH	H	0.0343658	enhancer of rudimentary homolog (Drosophila)
9093	DNAJA3	L	0.034468	DnaJ (Hsp40) homolog, subfamily A, member 3
119180	LYZL2	H	0.0347244	lysozyme-like 2
140432	RNF113B	H	0.0347502	ring finger protein 113B
968	CD68	H	0.0349049	CD68 molecule
126433	FBXO27	H	0.0350084	F-box protein 27
4099	MAG	H	0.0350603	myelin associated glycoprotein
341	APOC1	H	0.0351382	apolipoprotein C-I
23385	NCSTN	L	0.0351382	nicastrin
550	AUP1	H	0.0353989	ancient ubiquitous protein 1
10490	VTI1B	H	0.035425	vesicle transport through interaction with t-SNAREs homolog 1B (yeast)
1981	EIF4G1	L	0.035646	eukaryotic translation initiation factor 4 gamma, 1
1937	EEF1G	H	0.0356613	eukaryotic translation elongation factor 1 gamma
2542	SLC37A4	H	0.0362412	solute carrier family 37 (glucose-6-phosphate transporter), member 4
1381	CRABP1	H	0.0363244	cellular retinoic acid binding protein 1
143187	VTI1A	H	0.0365658	vesicle transport through interaction with t-SNAREs homolog 1A (yeast)
1073	CFL2	L	0.0366196	cofilin 2 (muscle)
25953	PNKD	H	0.0366465	paroxysmal nonkinesigenic dyskinesia
23225	NUP210	H	0.0368355	nucleoporin 210kDa
284207	METRNL	H	0.0370253	meteorin, glial cell differentiation regulator-like
7705	ZNF146	L	0.0370797	zinc finger protein 146
51032	CELA2B	H	0.0371341	chymotrypsin-like elastase family, member 2B
11095	ADAMTS8	H	0.0371341	ADAM metallopeptidase with thrombospondin type 1 motif, 8
4825	NKX6-1	H	0.0376824	NK6 homeobox 1
3661	IRF3	H	0.0379643	interferon regulatory factor 3
3083	HGFAC	H	0.0380981	HGF activator
11343	MGLL	H	0.0382655	monoglyceride lipase
140456	ASB11	L	0.0386303	ankyrin repeat and SOCS box containing 11
149986	LSM14B	L	0.0387074	LSM14B, SCD6 homolog B (S. cerevisiae)
4240	MFGE8	H	0.0389413	milk fat globule-EGF factor 8 protein
7353	UFD1L	H	0.0391687	ubiquitin fusion degradation 1 like (yeast)
55735	DNAJC11	H	0.0392544	DnaJ (Hsp40) homolog, subfamily C, member 11
10024	TROAP	H	0.0392829	trophinin associated protein (tastin)
10675	CSPG5	H	0.0393687	chondroitin sulfate proteoglycan 5 (neuroglycan C)
56927	GPR108	H	0.0393974	G protein-coupled receptor 108
79947	DHDDS	H	0.0395696	dehydrodolichyl diphosphate synthase
29911	HOOK2	H	0.0395696	hook homolog 2 (Drosophila)
79102	RNF26	H	0.0398002	ring finger protein 26
29979	UBQLN1	H	0.0399449	ubiquilin 1
84759	PCGF1	H	0.0399739	polycomb group ring finger 1
135892	TRIM50	H	0.0402065	tripartite motif containing 50
401036	ASB18	H	0.0403232	ankyrin repeat and SOCS box containing 18
25844	YIPF3	H	0.0403232	Yip1 domain family, member 3
23264	ZC3H7B	H	0.0406752	zinc finger CCCH-type containing 7B
84861	KLHL22	H	0.0407212	kelch-like 22 (Drosophila)
11264	PXMP4	H	0.040793	peroxisomal membrane protein 4, 24kDa
146310	RNF151	H	0.0409112	ring finger protein 151
23166	STAB1	H	0.0415364	stabilin 1
726	CAPN5	H	0.0417767	calpain 5
1506	CTRL	H	0.0418068	chymotrypsin-like
10005	ACOT8	H	0.0418671	acyl-CoA thioesterase 8
6737	TRIM21	H	0.0418671	tripartite motif containing 21
26135	SERBP1	L	0.0419274	SERPINE1 mRNA binding protein 1
5903	RANBP2	H	0.042413	RAN binding protein 2
391013	PLA2G2C	H	0.0432742	phospholipase A2, group IIC
3015	H2AFZ	L	0.0433674	H2A histone family, member Z
1745	DLX1	H	0.0434295	distal-less homeobox 1
22980	TCF25	H	0.0434918	transcription factor 25 (basic helix-loop-helix)
55666	NPLOC4	H	0.0436478	nuclear protein localization 4 homolog (S. cerevisiae)
10066	SCAMP2	H	0.0439612	secretory carrier membrane protein 2
8338	HIST2H2AC	H	0.0443715	histone cluster 2, H2ac
201475	RAB12	L	0.0444666	RAB12, member RAS oncogene family
390231	TRIM77	H	0.0445301	tripartite motif containing 77
10946	SF3A3	H	0.0447211	splicing factor 3a, subunit 3, 60kDa
4211	MEIS1	L	0.0451695	Meis homeobox 1
222545	GPRC6A	L	0.0452339	G protein-coupled receptor, family C, group 6, member A
221914	GPC2	H	0.0453951	glypican 2
283927	NUDT7	H	0.0455244	nudix (nucleoside diphosphate linked moiety X)-type motif 7
633	BGN	H	0.0456217	biglycan
10211	FLOT1	H	0.0458166	flotillin 1
112970	KTI12	H	0.046307	KTI12 homolog, chromatin associated (S. cerevisiae)
37	ACADVL	H	0.0467357	acyl-CoA dehydrogenase, very long chain
84231	TRAF7	H	0.046835	TNF receptor-associated factor 7
7328	UBE2H	H	0.0469678	ubiquitin-conjugating enzyme E2H (UBC8 homolog, yeast)
285755	PPIL6	L	0.0470011	peptidylprolyl isomerase (cyclophilin)-like 6
3449	IFNA16	H	0.0472344	interferon, alpha 16
375387	LRRC33	H	0.047805	leucine rich repeat containing 33
521	ATP5I	H	0.0478725	ATP synthase, H+ transporting, mitochondrial Fo complex, subunit E
5082	PDCL	L	0.0480416	phosducin-like
10943	MSL3	L	0.0485862	male-specific lethal 3 homolog (Drosophila)
313	AOAH	H	0.0486888	acyloxyacyl hydrolase (neutrophil)
3170	FOXA2	H	0.0486888	forkhead box A2
10745	PHTF1	L	0.0487231	putative homeodomain transcription factor 1
51747	LUC7L3	H	0.0489635	LUC7-like 3 (S. cerevisiae)
10695	CNPY3	H	0.0491359	canopy 3 homolog (zebrafish)
10406	WFDC2	H	0.0492741	WAP four-disulfide core domain 2
832	CAPZB	H	0.0495516	capping protein (actin filament) muscle Z-line, beta
56098	PCDHGC4	H	0.0502159	protocadherin gamma subfamily C, 4
220323	OAF	H	0.0503214	OAF homolog (Drosophila)
23409	SIRT4	H	0.0504978	sirtuin 4
51602	NOP58	L	0.0508876	NOP58 ribonucleoprotein homolog (yeast)
2312	FLG	H	0.0509943	filaggrin
427	ASAH1	L	0.0510656	N-acylsphingosine amidohydrolase (acid ceramidase) 1
79803	HPS6	H	0.051819	Hermansky-Pudlak syndrome 6
392188	USP17L8	H	0.0518195	ubiquitin specific peptidase 17-like 8
727800	RNF208	H	0.0518912	ring finger protein 208
10444	ZER1	H	0.0519635	zer-1 homolog (C. elegans)
4358	MPV17	H	0.0522536	MpV17 mitochondrial inner membrane protein
285973	ATG9B	H	0.0523627	ATG9 autophagy related 9 homolog B (S. cerevisiae)
23066	CAND2	H	0.0523992	cullin-associated and neddylation-dissociated 2 (putative)
254531	LPCAT4	H	0.0523992	lysophosphatidylcholine acyltransferase 4
3112	HLA-DOB	H	0.0525816	major histocompatibility complex, class II, DO beta
113457	TUBA3D	H	0.0529113	tubulin, alpha 3d
9953	HS3ST3B1	H	0.0534646	heparan sulfate (glucosamine) 3-O-sulfotransferase 3B1
63929	XPNPEP3	L	0.0536873	X-prolyl aminopeptidase (aminopeptidase P) 3, putative
4076	CAPRIN1	L	0.0537617	cell cycle associated protein 1
8507	ENC1	L	0.0539108	ectodermal-neural cortex 1 (with BTB-like domain)
9049	AIP	H	0.0539854	aryl hydrocarbon receptor interacting protein
5192	PEX10	H	0.0540602	peroxisomal biogenesis factor 10
26609	VCX	H	0.0542849	variable charge, X-linked
8970	HIST1H2BJ	H	0.0546521	histone cluster 1, H2bj
29951	PDZRN4	L	0.054699	PDZ domain containing ring finger 4
200734	SPRED2	H	0.054699	sprouty-related, EVH1 domain containing 2
112936	VPS26B	H	0.0551537	vacuolar protein sorting 26 homolog B (S. pombe)
245973	ATP6V1C2	H	0.055306	ATPase, H+ transporting, lysosomal 42kDa, V1 subunit C2
90637	ZFAND2A	H	0.0553822	zinc finger, AN1-type domain 2A
23788	MTCH2	L	0.0557649	mitochondrial carrier homolog 2 (C. elegans)
26269	FBXO8	L	0.0558417	F-box protein 8
8335	HIST1H2AB	H	0.0567312	histone cluster 1, H2ab
341392	ACSM4	H	0.0570824	acyl-CoA synthetase medium-chain family member 4
1571	CYP2E1	H	0.0571215	cytochrome P450, family 2, subfamily E, polypeptide 1
648	BMI1	L	0.0572391	BMI1 polycomb ring finger oncogene
128486	FITM2	H	0.0574355	fat storage-inducing transmembrane protein 2
84727	SPSB2	H	0.057593	splA/ryanodine receptor domain and SOCS box containing 2
130507	UBR3	L	0.0576324	ubiquitin protein ligase E3 component n-recognin 3 (putative)
6102	RP2	L	0.0577903	retinitis pigmentosa 2 (X-linked recessive)
27183	VPS4A	H	0.0577903	vacuolar protein sorting 4 homolog A (S. cerevisiae)
6903	TBCC	H	0.0581073	tubulin folding cofactor C
8082	SSPN	L	0.0583858	sarcospan (Kras oncogene-associated gene)
164153	UBL4B	H	0.0593896	ubiquitin-like 4B
5476	CTSA	H	0.0596733	cathepsin A
51542	VPS54	L	0.0597545	vacuolar protein sorting 54 homolog (S. cerevisiae)
54808	DYM	L	0.0604488	dymeclin
196463	PLBD2	H	0.0607778	phospholipase B domain containing 2
55559	HAUS7	H	0.0609842	HAUS augmin-like complex, subunit 7
94134	ARHGAP12	L	0.0611083	Rho GTPase activating protein 12
2330	FMO5	H	0.0612326	flavin containing monooxygenase 5
125972	CALR3	L	0.0619829	calreticulin 3
152579	SCFD2	H	0.0624031	sec1 family domain containing 2
78992	YIPF2	H	0.0626563	Yip1 domain family, member 2
8269	TMEM187	H	0.0629952	transmembrane protein 187
23710	GABARAPL1	H	0.0631492	GABA(A) receptor-associated protein like 1
81794	ADAMTS10	H	0.0633356	ADAM metallopeptidase with thrombospondin type 1 motif, 10
284119	PTRF	H	0.0633783	polymerase I and transcript release factor
155051	CRYGN	H	0.0637204	crystallin, gamma N
23019	CNOT1	L	0.0637633	CCR4-NOT transcription complex, subunit 1
81894	SLC25A28	H	0.0640641	solute carrier family 25, member 28
8748	ADAM20	L	0.0641934	ADAM metallopeptidase domain 20
338328	GPIHBP1	H	0.0642365	glycosylphosphatidylinositol anchored high density lipoprotein binding protein 1
3933	LCN1	H	0.0644093	lipocalin 1 (tear prealbumin)
1947	EFNB1	H	0.0651916	ephrin-B1
2867	FFAR2	H	0.0653228	free fatty acid receptor 2
3267	AGFG1	L	0.0653228	ArfGAP with FG repeats 1
10574	CCT7	H	0.0654518	chaperonin containing TCP1, subunit 7 (eta)
8329	HIST1H2AI	H	0.0654541	histone cluster 1, H2ai
23184	MESDC2	H	0.0656296	mesoderm development candidate 2
60509	AGBL5	H	0.0656736	ATP/GTP binding protein-like 5
203062	TSNARE1	H	0.0658495	t-SNARE domain containing 1
30	ACAA1	H	0.0660701	acetyl-CoA acyltransferase 1
252839	TMEM9	H	0.0661142	transmembrane protein 9
140739	UBE2F	H	0.0662027	ubiquitin-conjugating enzyme E2F (putative)
10287	RGS19	H	0.0662027	regulator of G-protein signaling 19
441933	OR13G1	L	0.0663355	olfactory receptor, family 13, subfamily G, member 1
140459	ASB6	H	0.0664685	ankyrin repeat and SOCS box containing 6
2288	FKBP4	H	0.0664685	FK506 binding protein 4, 59kDa
6272	SORT1	L	0.0666018	sortilin 1
3313	HSPA9	L	0.0669136	heat shock 70kDa protein 9 (mortalin)
6748	SSR4	H	0.0669136	signal sequence receptor, delta (translocon-associated protein delta)
10786	SLC17A3	H	0.0670029	solute carrier family 17 (sodium phosphate), member 3
127845	GOLT1A	H	0.0675857	golgi transport 1A
441509	GLRA4	H	0.0676758	glycine receptor, alpha 4
1585	CYP11B2	H	0.0682635	cytochrome P450, family 11, subfamily B, polypeptide 2
11021	RAB35	H	0.0684451	RAB35, member RAS oncogene family
22859	LPHN1	H	0.0685361	latrophilin 1
261729	STEAP2	L	0.0687184	six transmembrane epithelial antigen of the prostate 2
8417	STX7	L	0.0692676	syntaxin 7
91057	CCDC34	H	0.0692676	coiled-coil domain containing 34
4481	MSR1	L	0.0693135	macrophage scavenger receptor 1
165721	DNAJB8	H	0.0696357	DnaJ (Hsp40) homolog, subfamily B, member 8
57159	TRIM54	H	0.069728	tripartite motif containing 54
516	ATP5G1	H	0.069728	ATP synthase, H+ transporting, mitochondrial Fo complex, subunit C1 (subunit 9)
26128	KIAA1279	H	0.0702373	KIAA1279
253152	EPHX4	L	0.0702837	epoxide hydrolase 4
6439	SFTPB	H	0.0705164	surfactant protein B
27433	TOR2A	H	0.0708432	torsin family 2, member A
9810	RNF40	H	0.0709836	ring finger protein 40
1660	DHX9	L	0.0710671	DEAH (Asp-Glu-Ala-His) box polypeptide 9
57017	COQ9	H	0.0710773	coenzyme Q9 homolog (S. cerevisiae)
6574	SLC20A1	H	0.0715476	solute carrier family 20 (phosphate transporter), member 1
1059	CENPB	H	0.0723528	centromere protein B, 80kDa
6230	RPS25	L	0.0725154	ribosomal protein S25
23355	VPS8	H	0.0725434	vacuolar protein sorting 8 homolog (S. cerevisiae)
94097	SFXN5	H	0.0725434	sideroflexin 5
8352	HIST1H3C	H	0.0725434	histone cluster 1, H3c
23624	CBLC	H	0.0725434	Cas-Br-M (murine) ecotropic retroviral transforming sequence c
26047	CNTNAP2	H	0.0727821	contactin associated protein-like 2
84164	ASCC2	H	0.0731175	activating signal cointegrator 1 complex subunit 2
10451	VAV3	H	0.0733097	vav 3 guanine nucleotide exchange factor
972	CD74	H	0.0735987	CD74 molecule, major histocompatibility complex, class II invariant chain
56681	SAR1A	L	0.0740341	SAR1 homolog A (S. cerevisiae)
379	ARL4D	H	0.0742282	ADP-ribosylation factor-like 4D
55275	VPS53	L	0.0748621	vacuolar protein sorting 53 homolog (S. cerevisiae)
10399	GNB2L1	H	0.0748621	guanine nucleotide binding protein (G protein), beta polypeptide 2-like 1
255798	C3orf43	L	0.0748621	chromosome 3 open reading frame 43
80176	SPSB1	H	0.075009	splA/ryanodine receptor domain and SOCS box containing 1
3437	IFIT3	L	0.0752544	interferon-induced protein with tetratricopeptide repeats 3
4137	MAPT	H	0.0754019	microtubule-associated protein tau
7265	TTC1	H	0.0759449	tetratricopeptide repeat domain 1
10809	STARD10	H	0.0759449	StAR-related lipid transfer (START) domain containing 10
1406	CRX	H	0.076044	cone-rod homeobox
26154	ABCA12	L	0.0762424	ATP-binding cassette, sub-family A (ABC1), member 12
387923	SERP2	H	0.0766406	stress-associated endoplasmic reticulum protein family member 2
4033	LRMP	L	0.0766905	lymphoid-restricted membrane protein
29761	USP25	L	0.0769404	ubiquitin specific peptidase 25
11161	C14orf1	H	0.0770906	chromosome 14 open reading frame 1
7979	SHFM1	L	0.0770906	split hand/foot malformation (ectrodactyly) type 1
81502	HM13	H	0.0780476	histocompatibility (minor) 13
162517	FBXO39	H	0.0783518	F-box protein 39
79258	MMEL1	H	0.0784534	membrane metallo-endopeptidase-like 1
9306	SOCS6	L	0.0785043	suppressor of cytokine signaling 6
115992	RNF166	H	0.0785551	ring finger protein 166
139760	GPR119	H	0.0787079	G protein-coupled receptor 119
5193	PEX12	H	0.0788099	peroxisomal biogenesis factor 12
2896	GRN	H	0.078861	granulin
170690	ADAMTS16	H	0.0791677	ADAM metallopeptidase with thrombospondin type 1 motif, 16
348303	SELV	H	0.0791677	selenoprotein V
55299	BRIX1	L	0.0792702	BRX1, biogenesis of ribosomes, homolog (S. cerevisiae)
134266	GRPEL2	L	0.0793728	GrpE-like 2, mitochondrial (E. coli)
285848	PNPLA1	H	0.0794241	patatin-like phospholipase domain containing 1
8720	MBTPS1	H	0.0798874	membrane-bound transcription factor peptidase, site 1
51463	GPR89B	L	0.0805603	G protein-coupled receptor 89B
348487	FAM131C	H	0.0807163	family with sequence similarity 131, member C
326624	RAB37	H	0.0811333	RAB37, member RAS oncogene family
57528	KCTD16	L	0.0811333	potassium channel tetramerisation domain containing 16
2255	FGF10	H	0.0813949	fibroblast growth factor 10
283659	PRTG	L	0.0821837	protogenin
2059	EPS8	L	0.0825009	epidermal growth factor receptor pathway substrate 8
23130	ATG2A	H	0.0825009	ATG2 autophagy related 2 homolog A (S. cerevisiae)
123745	PLA2G4E	H	0.082766	phospholipase A2, group IVE
149371	EXOC8	H	0.0829255	exocyst complex component 8
6907	TBL1X	L	0.0830319	transducin (beta)-like 1X-linked
1379	CR1L	H	0.0831917	complement component (3b/4b) receptor 1-like
6923	TCEB2	H	0.0833518	transcription elongation factor B (SIII), polypeptide 2 (18kDa, elongin B)
23014	FBXO21	H	0.0834052	F-box protein 21
54894	RNF43	L	0.0834586	ring finger protein 43
23234	DNAJC9	H	0.0837798	DnaJ (Hsp40) homolog, subfamily C, member 9
116150	NUS1	H	0.0837798	nuclear undecaprenyl pyrophosphate synthase 1 homolog (S. cerevisiae)
5988	RFPL1	L	0.0838871	ret finger protein-like 1
3073	HEXA	L	0.0838871	hexosaminidase A (alpha polypeptide)
10224	ZNF443	H	0.0839408	zinc finger protein 443
10677	AVIL	H	0.0842097	advillin
25841	ABTB2	H	0.0843713	ankyrin repeat and BTB (POZ) domain containing 2
2852	GPER	H	0.0844253	G protein-coupled estrogen receptor 1
1369	CPN1	H	0.0844253	carboxypeptidase N, polypeptide 1
7917	BAG6	H	0.0844792	BCL2-associated athanogene 6
79097	TRIM48	L	0.0845332	tripartite motif containing 48
84000	TMPRSS13	H	0.0849662	transmembrane protease, serine 13
6556	SLC11A1	H	0.0850205	solute carrier family 11 (proton-coupled divalent metal ion transporters), member 1
7044	LEFTY2	H	0.0850205	left-right determination factor 2
197322	ACSF3	H	0.0853465	acyl-CoA synthetase family member 3
8287	USP9Y	L	0.085401	ubiquitin specific peptidase 9, Y-linked
9718	ECE2	H	0.0855099	endothelin converting enzyme 2
63943	FKBPL	H	0.0855099	FK506 binding protein like
3853	KRT6A	H	0.0862759	keratin 6A
7321	UBE2D1	L	0.0864958	ubiquitin-conjugating enzyme E2D 1 (UBC4/5 homolog, yeast)
285231	FBXW12	L	0.0868816	F-box and WD repeat domain containing 12
146212	KCTD19	H	0.0872688	potassium channel tetramerisation domain containing 19
10059	DNM1L	L	0.0873243	dynamin 1-like
8546	AP3B1	L	0.0879359	adaptor-related protein complex 3, beta 1 subunit
3990	LIPC	H	0.0879917	lipase, hepatic
55741	EDEM2	H	0.0879917	ER degradation enhancer, mannosidase alpha-like 2
11202	KLK8	H	0.0880475	kallikrein-related peptidase 8
22893	BAHD1	H	0.0884822	bromo adjacent homology domain containing 1
7538	ZFP36	H	0.0887193	zinc finger protein 36, C3H type, homolog (mouse)
404636	FAM45A	H	0.088826	family with sequence similarity 45, member A
51088	KLHL5	L	0.0888317	kelch-like 5 (Drosophila)
51130	ASB3	L	0.0891695	ankyrin repeat and SOCS box containing 3
50613	UBQLN3	H	0.0892824	ubiquilin 3
56521	DNAJC12	L	0.089517	DnaJ (Hsp40) homolog, subfamily C, member 12
56262	LRRC8A	L	0.0898483	leucine rich repeat containing 8 family, member A
4780	NFE2L2	L	0.0899618	nuclear factor (erythroid-derived 2)-like 2
51449	PCYOX1	L	0.0900186	prenylcysteine oxidase 1
11322	TMC6	H	0.0903031	transmembrane channel-like 6
11060	WWP2	H	0.0908169	WW domain containing E3 ubiquitin protein ligase 2
6613	SUMO2	H	0.0909888	SMT3 suppressor of mif two 3 homolog 2 (S. cerevisiae)
26986	PABPC1	L	0.0913907	poly(A) binding protein, cytoplasmic 1
1418	CRYGA	H	0.0913907	crystallin, gamma A
10015	PDCD6IP	H	0.0915633	programmed cell death 6 interacting protein
643904	RNF222	H	0.0920251	ring finger protein 222
10693	CCT6B	L	0.0921408	chaperonin containing TCP1, subunit 6B (zeta 2)
9581	PREPL	L	0.0923727	prolyl endopeptidase-like
1767	DNAH5	H	0.0926049	dynein, axonemal, heavy chain 5
53917	RAB24	H	0.0926049	RAB24, member RAS oncogene family
8988	HSPB3	H	0.0927795	heat shock 27kDa protein 3
407738	FAM19A1	H	0.0928377	family with sequence similarity 19 (chemokine (C-C motif)-like), member A1
258010	SVIP	L	0.0933631	small VCP/p97-interacting protein
25862	USP49	H	0.0934216	ubiquitin specific peptidase 49
10897	YIF1A	H	0.0938909	Yip1 interacting factor homolog A (S. cerevisiae)
8916	HERC3	H	0.0941262	hect domain and RLD 3
10961	ERP29	H	0.0943621	endoplasmic reticulum protein 29
255394	TCP11L2	L	0.0943621	t-complex 11 (mouse)-like 2
6565	SLC15A2	L	0.0944211	solute carrier family 15 (H+/peptide transporter), member 2
54813	KLHL28	L	0.0944801	kelch-like 28 (Drosophila)
11275	KLHL2	L	0.0945392	kelch-like 2, Mayven (Drosophila)
27173	SLC39A1	H	0.0953101	solute carrier family 39 (zinc transporter), member 1
1060	CENPC1	L	0.0953696	centromere protein C 1
90580	C19orf52	H	0.0955661	chromosome 19 open reading frame 52
25987	TSKU	H	0.0957869	tsukushi small leucine rich proteoglycan homolog (Xenopus laevis)
137964	AGPAT6	L	0.0960859	1-acylglycerol-3-phosphate O-acyltransferase 6 (lysophosphatidic acid acyltransferase, zeta)
9789	SPCS2	H	0.0960859	signal peptidase complex subunit 2 homolog (S. cerevisiae)
259173	ALS2CL	H	0.0963857	ALS2 C-terminal like
23230	VPS13A	L	0.0973499	vacuolar protein sorting 13 homolog A (S. cerevisiae)
125228	C18orf19	H	0.097471	chromosome 18 open reading frame 19
5641	LGMN	L	0.0975922	legumain
29122	PRSS50	H	0.0976528	protease, serine, 50
79845	RNF122	H	0.0978957	ring finger protein 122
126326	GIPC3	H	0.098139	GIPC PDZ domain containing family, member 3
10972	TMED10	L	0.098566	transmembrane emp24-like trafficking protein 10 (yeast)
348158	ACSM2B	H	0.0996092	acyl-CoA synthetase medium-chain family member 2B
22941	SHANK2	H	0.100103	SH3 and multiple ankyrin repeat domains 2
9859	CEP170	L	0.100475	centrosomal protein 170kDa
128866	CHMP4B	H	0.100661	chromatin modifying protein 4B
4969	OGN	H	0.100661	osteoglycin
345557	PLCXD3	H	0.100972	phosphatidylinositol-specific phospholipase C, X domain containing 3
11074	TRIM31	H	0.101347	tripartite motif containing 31
115817	DHRS1	H	0.101534	dehydrogenase/reductase (SDR family) member 1
7779	SLC30A1	L	0.101534	solute carrier family 30 (zinc transporter), member 1
346606	MOGAT3	H	0.101597	monoacylglycerol O-acyltransferase 3
10869	USP19	H	0.101785	ubiquitin specific peptidase 19
440738	MAP1LC3C	H	0.101785	microtubule-associated protein 1 light chain 3 gamma
4648	MYO7B	H	0.10191	myosin VIIB
649	BMP1	H	0.10191	bone morphogenetic protein 1
10430	TMEM147	H	0.102224	transmembrane protein 147
54431	DNAJC10	H	0.102918	DnaJ (Hsp40) homolog, subfamily C, member 10
79716	NPEPL1	H	0.102918	aminopeptidase-like 1
93979	CPA5	H	0.102981	carboxypeptidase A5
9867	PJA2	L	0.103171	praja ring finger 2
26133	TRPC4AP	H	0.103425	transient receptor potential cation channel, subfamily C, member 4 associated protein
54165	DCUN1D1	H	0.103552	DCN1, defective in cullin neddylation 1, domain containing 1 (S. cerevisiae)
1994	ELAVL1	H	0.103679	ELAV (embryonic lethal, abnormal vision, Drosophila)-like 1 (Hu antigen R)
8340	HIST1H2BL	H	0.104062	histone cluster 1, H2bl
11056	DDX52	L	0.104894	DEAD (Asp-Glu-Ala-Asp) box polypeptide 52
23659	PLA2G15	H	0.105151	phospholipase A2, group XV
22870	PPP6R1	H	0.105344	protein phosphatase 6, regulatory subunit 1
85313	PPIL4	L	0.105344	peptidylprolyl isomerase (cyclophilin)-like 4
29956	LASS2	H	0.105473	LAG1 homolog, ceramide synthase 2
9781	RNF144A	H	0.105473	ring finger protein 144A
57574	MARCH4	H	0.105537	membrane-associated ring finger (C3HC4) 4
192683	SCAMP5	H	0.105731	secretory carrier membrane protein 5
23585	TMEM50A	L	0.10586	transmembrane protein 50A
6904	TBCD	H	0.106055	tubulin folding cofactor D
10102	TSFM	H	0.106119	Ts translation elongation factor, mitochondrial
142686	ASB14	L	0.106574	ankyrin repeat and SOCS box containing 14
84767	SPRYD5	H	0.107095	SPRY domain containing 5
1266	CNN3	H	0.107226	calponin 3, acidic
8560	DEGS1	H	0.108473	degenerative spermatocyte homolog 1, lipid desaturase (Drosophila)
8139	GAN	L	0.109068	gigaxonin
653505	PPIAL4B	H	0.109532	peptidylprolyl isomerase A (cyclophilin A)-like 4B
6728	SRP19	L	0.109798	signal recognition particle 19kDa
9520	NPEPPS	L	0.110065	aminopeptidase puromycin sensitive
83939	EIF2A	L	0.110131	eukaryotic translation initiation factor 2A, 65kDa
51552	RAB14	H	0.112283	RAB14, member RAS oncogene family
8100	IFT88	H	0.11344	intraflagellar transport 88 homolog (Chlamydomonas)
55072	RNF31	H	0.113508	ring finger protein 31
23020	SNRNP200	L	0.113645	small nuclear ribonucleoprotein 200kDa (U5)
11152	WDR45	H	0.113713	WD repeat domain 45
64699	TMPRSS3	H	0.113782	transmembrane protease, serine 3
10269	ZMPSTE24	L	0.11385	zinc metallopeptidase (STE24 homolog, S. cerevisiae)
23504	RIMBP2	H	0.114125	RIMS binding protein 2
9986	RCE1	H	0.114468	RCE1 homolog, prenyl protein peptidase (S. cerevisiae)
133619	PRRC1	L	0.114468	proline-rich coiled-coil 1
23241	PACS2	H	0.115573	phosphofurin acidic cluster sorting protein 2
28966	SNX24	L	0.115781	sorting nexin 24
9695	EDEM1	L	0.116199	ER degradation enhancer, mannosidase alpha-like 1
374407	DNAJB13	H	0.116199	DnaJ (Hsp40) homolog, subfamily B, member 13
30846	EHD2	H	0.116477	EH-domain containing 2
654	BMP6	L	0.117317	bone morphogenetic protein 6
10447	FAM3C	L	0.117457	family with sequence similarity 3, member C
3929	LBP	H	0.117808	lipopolysaccharide binding protein
182	JAG1	L	0.117808	jagged 1
9852	EPM2AIP1	L	0.117949	EPM2A (laforin) interacting protein 1
255374	MBLAC1	H	0.11809	metallo-beta-lactamase domain containing 1
91445	RNF185	H	0.118443	ring finger protein 185
64410	KLHL25	H	0.118555	kelch-like 25 (Drosophila)
142891	SAMD8	L	0.11901	sterile alpha motif domain containing 8
25888	ZNF473	H	0.11901	zinc finger protein 473
51360	MBTPS2	H	0.119223	membrane-bound transcription factor peptidase, site 2
64786	TBC1D15	L	0.12022	TBC1 domain family, member 15
2267	FGL1	H	0.120363	fibrinogen-like 1
79841	AGBL2	L	0.120435	ATP/GTP binding protein-like 2
4693	NDP	L	0.12065	Norrie disease (pseudoglioma)
158062	LCN6	H	0.120793	lipocalin 6
10263	CDK2AP2	H	0.121081	cyclin-dependent kinase 2 associated protein 2
51002	TPRKB	L	0.121225	TP53RK binding protein
717	C2	H	0.122091	complement component 2
266743	NPAS4	H	0.123399	neuronal PAS domain protein 4
64788	LMF1	H	0.123472	lipase maturation factor 1
143879	KBTBD3	H	0.123764	kelch repeat and BTB (POZ) domain containing 3
22796	COG2	L	0.123837	component of oligomeric golgi complex 2
51668	HSPB11	L	0.12435	heat shock protein family B (small), member 11
386618	KCTD4	L	0.124865	potassium channel tetramerisation domain containing 4
2326	FMO1	L	0.125751	flavin containing monooxygenase 1
1209	CLPTM1	H	0.125825	cleft lip and palate associated transmembrane protein 1
6905	TBCE	L	0.125825	tubulin folding cofactor E
161725	OTUD7A	H	0.125951	OTU domain containing 7A
84541	KBTBD8	L	0.125973	kelch repeat and BTB (POZ) domain containing 8
83932	C1orf124	L	0.125973	chromosome 1 open reading frame 124
1534	CYB561	H	0.126122	cytochrome b-561
207063	DHRSX	H	0.126791	dehydrogenase/reductase (SDR family) X-linked
120146	TRIM64	H	0.126866	tripartite motif containing 64
23024	PDZRN3	H	0.127239	PDZ domain containing ring finger 3
8193	DPF1	H	0.127314	D4, zinc and double PHD fingers family 1
84277	DNAJC30	H	0.127538	DnaJ (Hsp40) homolog, subfamily C, member 30
10942	PRSS21	L	0.128179	protease, serine, 21 (testisin)
56916	SMARCAD1	L	0.128364	SWI/SNF-related, matrix-associated actin-dependent regulator of chromatin, subfamily a, containing DEAD/H box 1
90933	TRIM41	H	0.128364	tripartite motif containing 41
6945	MLX	H	0.129162	MAX-like protein X
3108	HLA-DMA	H	0.129421	major histocompatibility complex, class II, DM alpha
1657	DMXL1	L	0.130408	Dmx-like 1
161003	STOML3	L	0.130485	stomatin (EPB72)-like 3
23219	FBXO28	H	0.13079	F-box protein 28
79872	CBLL1	L	0.131019	Cas-Br-M (murine) ecotropic retroviral transforming sequence-like 1
147968	CAPN12	H	0.131248	calpain 12
23326	USP22	L	0.131248	ubiquitin specific peptidase 22
7318	UBA7	H	0.131862	ubiquitin-like modifier activating enzyme 7
59343	SENP2	H	0.133173	SUMO1/sentrin/SMT3 specific peptidase 2
10434	LYPLA1	L	0.133251	lysophospholipase I
399687	MYO18A	H	0.133872	myosin XVIIIA
136647	C7orf11	L	0.133872	chromosome 7 open reading frame 11
339122	RAB43	H	0.134336	RAB43, member RAS oncogene family
7763	ZFAND5	L	0.134417	zinc finger, AN1-type domain 5
4542	MYO1F	H	0.134573	myosin IF
23417	MLYCD	H	0.135042	malonyl-CoA decarboxylase
10293	TRAIP	H	0.13512	TRAF interacting protein
55054	ATG16L1	H	0.135198	ATG16 autophagy related 16-like 1 (S. cerevisiae)
7266	DNAJC7	H	0.135277	DnaJ (Hsp40) homolog, subfamily C, member 7
89874	SLC25A21	H	0.135277	solute carrier family 25 (mitochondrial oxodicarboxylate carrier), member 21
144132	DNHD1	H	0.135433	dynein heavy chain domain 1
126393	HSPB6	H	0.13559	heat shock protein, alpha-crystallin-related, B6
80227	PAAF1	H	0.13622	proteasomal ATPase-associated factor 1
146845	WDR16	L	0.136298	WD repeat domain 16
90678	LRSAM1	H	0.136456	leucine rich repeat and sterile alpha motif containing 1
79634	SCRN3	L	0.136535	secernin 3
7189	TRAF6	H	0.136851	TNF receptor-associated factor 6
27067	STAU2	H	0.137168	staufen, RNA binding protein, homolog 2 (Drosophila)
6447	SCG5	L	0.137406	secretogranin V (7B2 protein)
4637	MYL6	L	0.137723	myosin, light chain 6, alkali, smooth muscle and non-muscle
27072	VPS41	H	0.137962	vacuolar protein sorting 41 homolog (S. cerevisiae)
54878	DPP8	H	0.138041	dipeptidyl-peptidase 8
23233	EXOC6B	L	0.138999	exocyst complex component 6B
55709	KBTBD4	H	0.1394	kelch repeat and BTB (POZ) domain containing 4
9618	TRAF4	H	0.139962	TNF receptor-associated factor 4
10905	MAN1A2	H	0.139962	mannosidase, alpha, class 1A, member 2
4651	MYO10	L	0.140042	myosin X
397	ARHGDIB	H	0.140204	Rho GDP dissociation inhibitor (GDI) beta
7341	SUMO1	L	0.140365	SMT3 suppressor of mif two 3 homolog 1 (S. cerevisiae)
54764	ZRANB1	L	0.140849	zinc finger, RAN-binding domain containing 1
22992	KDM2A	H	0.141173	lysine (K)-specific demethylase 2A
1756	DMD	H	0.141335	dystrophin
54472	TOLLIP	H	0.141822	toll interacting protein
117584	RFFL	H	0.14231	ring finger and FYVE-like domain containing 1
173	AFM	L	0.142473	afamin
55063	ZCWPW1	H	0.142473	zinc finger, CW type with PWWP domain 1
23071	ERP44	L	0.143127	endoplasmic reticulum protein 44
3257	HPS1	H	0.143373	Hermansky-Pudlak syndrome 1
4332	MNDA	L	0.143947	myeloid cell nuclear differentiation antigen
4821	NKX2-2	H	0.14403	NK2 homeobox 2
26232	FBXO2	H	0.144606	F-box protein 2
26020	LRP10	H	0.144771	low density lipoprotein receptor-related protein 10
11274	USP18	H	0.144937	ubiquitin specific peptidase 18
245972	ATP6V0D2	L	0.145102	ATPase, H+ transporting, lysosomal 38kDa, V0 subunit d2
7375	USP4	H	0.145102	ubiquitin specific peptidase 4 (proto-oncogene)
337867	UBAC2	H	0.145586	UBA domain containing 2
23443	SLC35A3	L	0.145599	solute carrier family 35 (UDP-N-acetylglucosamine (UDP-GlcNAc) transporter), member A3
29886	SNX8	H	0.145599	sorting nexin 8
266727	MDGA1	H	0.14618	MAM domain containing glycosylphosphatidylinositol anchor 1
133121	ENPP6	H	0.146347	ectonucleotide pyrophosphatase/phosphodiesterase 6
51617	HMP19	H	0.146597	HMP19 protein
57586	SYT13	L	0.14693	synaptotagmin XIII
242	ALOX12B	H	0.147098	arachidonate 12-lipoxygenase, 12R type
23295	MGRN1	H	0.147767	mahogunin, ring finger 1
1557	CYP2C19	H	0.147767	cytochrome P450, family 2, subfamily C, polypeptide 19
221687	RNF182	L	0.148187	ring finger protein 182
554251	FBXO48	L	0.148271	F-box protein 48
80311	KLHL15	L	0.148271	kelch-like 15 (Drosophila)
4621	MYH3	H	0.148777	myosin, heavy chain 3, skeletal muscle, embryonic
27005	USP21	H	0.149114	ubiquitin specific peptidase 21
8848	TSC22D1	H	0.149435	TSC22 domain family, member 1
84901	NFATC2IP	L	0.149706	nuclear factor of activated T-cells, cytoplasmic, calcineurin-dependent 2 interacting protein
6745	SSR1	L	0.15013	signal sequence receptor, alpha
127247	ASB17	H	0.1503	ankyrin repeat and SOCS box containing 17
7512	XPNPEP2	H	0.150896	X-prolyl aminopeptidase (aminopeptidase P) 2, membrane-bound
6687	SPG7	H	0.152178	spastic paraplegia 7 (pure and complicated autosomal recessive)
10966	RAB40B	H	0.152608	RAB40B, member RAS oncogene family
80975	TMPRSS5	H	0.153038	transmembrane protease, serine 5
10139	ARFRP1	H	0.153625	ADP-ribosylation factor related protein 1
150379	PNPLA5	H	0.153642	patatin-like phospholipase domain containing 5
1618	DAZL	H	0.154595	deleted in azoospermia-like
89122	TRIM4	L	0.155116	tripartite motif containing 4
59349	KLHL12	L	0.155116	kelch-like 12 (Drosophila)
27297	CRCP	H	0.156111	CGRP receptor component
4925	NUCB2	H	0.156163	nucleobindin 2
7732	RNF112	H	0.156251	ring finger protein 112
1805	DPT	H	0.156338	dermatopontin
55556	ENOSF1	L	0.156777	enolase superfamily member 1
282770	OR10AG1	L	0.15704	olfactory receptor, family 10, subfamily AG, member 1
85406	DNAJC14	H	0.157128	DnaJ (Hsp40) homolog, subfamily C, member 14
79819	WDR78	H	0.157744	WD repeat domain 78
7332	UBE2L3	H	0.157744	ubiquitin-conjugating enzyme E2L 3
254170	FBXO33	L	0.159159	F-box protein 33
55850	USE1	H	0.159515	unconventional SNARE in the ER 1 homolog (S. cerevisiae)
166378	SPATA5	L	0.159515	spermatogenesis associated 5
377047	PRSS45	H	0.159515	protease, serine, 45
2109	ETFB	H	0.159692	electron-transfer-flavoprotein, beta polypeptide
321	APBA2	H	0.15987	amyloid beta (A4) precursor protein-binding, family A, member 2
22920	KIFAP3	L	0.160673	kinesin-associated protein 3
6726	SRP9	H	0.161031	signal recognition particle 9kDa
200081	TXLNA	H	0.161031	taxilin alpha
27075	TSPAN13	L	0.161121	tetraspanin 13
151888	BTLA	L	0.161659	B and T lymphocyte associated
7326	UBE2G1	H	0.161839	ubiquitin-conjugating enzyme E2G 1 (UBC7 homolog, yeast)
401720	FIGNL2	H	0.162019	fidgetin-like 2
154881	KCTD7	L	0.162198	potassium channel tetramerisation domain containing 7
23341	DNAJC16	H	0.162289	DnaJ (Hsp40) homolog, subfamily C, member 16
57805	KIAA1967	H	0.162379	KIAA1967
130355	C2orf76	H	0.162469	chromosome 2 open reading frame 76
10040	TOM1L1	H	0.163101	target of myb1 (chicken)-like 1
25948	KBTBD2	L	0.163372	kelch repeat and BTB (POZ) domain containing 2
9421	HAND1	H	0.163463	heart and neural crest derivatives expressed 1
54941	RNF125	H	0.163553	ring finger protein 125
25873	RPL36	H	0.163935	ribosomal protein L36
196441	ZFC3H1	L	0.164007	zinc finger, C3H1-type containing
164045	HFM1	L	0.164188	HFM1, ATP-dependent DNA helicase homolog (S. cerevisiae)
51014	TMED7	L	0.164552	transmembrane emp24 protein transport domain containing 7
151516	ASPRV1	H	0.164552	aspartic peptidase, retroviral-like 1
23268	DNMBP	L	0.164734	dynamin binding protein
114885	OSBPL11	L	0.164916	oxysterol binding protein-like 11
1314	COPA	L	0.165008	coatomer protein complex, subunit alpha
9921	RNF10	H	0.165373	ring finger protein 10
201294	UNC13D	H	0.165373	unc-13 homolog D (C. elegans)
8890	EIF2B4	H	0.165464	eukaryotic translation initiation factor 2B, subunit 4 delta, 67kDa
285888	CNPY1	H	0.165464	canopy 1 homolog (zebrafish)
1106	CHD2	H	0.165647	chromodomain helicase DNA binding protein 2
8925	HERC1	H	0.165647	hect (homologous to the E6-AP (UBE3A) carboxyl terminus) domain and RCC1 (CHC1)-like domain (RLD) 1
122970	ACOT4	L	0.166013	acyl-CoA thioesterase 4
151112	ZSWIM2	L	0.166105	zinc finger, SWIM-type containing 2
29925	GMPPB	H	0.166196	GDP-mannose pyrophosphorylase B
64063	PRSS22	H	0.16638	protease, serine, 22
146330	FBXL16	H	0.167484	F-box and leucine-rich repeat protein 16
79596	RNF219	H	0.167576	ring finger protein 219
388015	RTL1	H	0.167668	retrotransposon-like 1
525	ATP6V1B1	H	0.167668	ATPase, H+ transporting, lysosomal 56/58kDa, V1 subunit B1
25782	RAB3GAP2	L	0.167668	RAB3 GTPase activating protein subunit 2 (non-catalytic)
3185	HNRNPF	H	0.167945	heterogeneous nuclear ribonucleoprotein F
23358	USP24	L	0.168593	ubiquitin specific peptidase 24
494188	FBXO47	L	0.168779	F-box protein 47
538	ATP7A	H	0.16915	ATPase, Cu++ transporting, alpha polypeptide
154214	RNF217	L	0.169615	ring finger protein 217
51028	VPS36	H	0.169708	vacuolar protein sorting 36 homolog (S. cerevisiae)
2775	GNAO1	H	0.170268	guanine nucleotide binding protein (G protein), alpha activating activity polypeptide O
1855	DVL1	H	0.170361	dishevelled, dsh homolog 1 (Drosophila)
112574	SNX18	H	0.170548	sorting nexin 18
3930	LBR	H	0.170642	lamin B receptor
29974	A1CF	L	0.170642	APOBEC1 complementation factor
55175	KLHL11	H	0.170829	kelch-like 11 (Drosophila)
284541	CYP4A22	H	0.17111	cytochrome P450, family 4, subfamily A, polypeptide 22
170689	ADAMTS15	H	0.173086	ADAM metallopeptidase with thrombospondin type 1 motif, 15
22926	ATF6	H	0.173181	activating transcription factor 6
5899	RALB	L	0.173465	v-ral simian leukemia viral oncogene homolog B (ras related; GTP binding protein)
27230	SERP1	L	0.17356	stress-associated endoplasmic reticulum protein 1
10228	STX6	H	0.173654	syntaxin 6
64374	SIL1	L	0.174414	SIL1 homolog, endoplasmic reticulum chaperone (S. cerevisiae)
64222	TOR3A	H	0.174794	torsin family 3, member A
8945	BTRC	L	0.174794	beta-transducin repeat containing
79004	CUEDC2	H	0.175366	CUE domain containing 2
2169	FABP2	L	0.175748	fatty acid binding protein 2, intestinal
143425	SYT9	L	0.176707	synaptotagmin IX
9097	USP14	H	0.177091	ubiquitin specific peptidase 14 (tRNA-guanine transglycosylase)
27246	RNF115	L	0.178151	ring finger protein 115
148581	UBE2U	H	0.178441	ubiquitin-conjugating enzyme E2U (putative)
55435	AP1AR	L	0.179022	adaptor-related protein complex 1 associated regulatory protein
51327	AHSP	H	0.179119	alpha hemoglobin stabilizing protein
346	APOC4	H	0.179216	apolipoprotein C-IV
33	ACADL	H	0.17941	acyl-CoA dehydrogenase, long chain
26263	FBXO22	L	0.179768	F-box protein 22
28959	TMEM176B	H	0.179799	transmembrane protein 176B
92270	ATP6AP1L	H	0.18048	ATPase, H+ transporting, lysosomal accessory protein 1-like
254042	METAP1D	H	0.180563	methionyl aminopeptidase type 1D (mitochondrial)
7145	TNS1	H	0.180773	tensin 1
57161	PELI2	L	0.181066	pellino homolog 2 (Drosophila)
442038	SULT1C3	L	0.18136	sulfotransferase family, cytosolic, 1C, member 3
2705	GJB1	L	0.181653	gap junction protein, beta 1, 32kDa
79172	CENPO	H	0.181849	centromere protein O
6928	HNF1B	H	0.18234	HNF1 homeobox B
23312	DMXL2	L	0.182537	Dmx-like 2
2799	GNS	H	0.182734	glucosamine (N-acetyl)-6-sulfatase
9639	ARHGEF10	H	0.182931	Rho guanine nucleotide exchange factor (GEF) 10
359710	C20orf185	H	0.182931	chromosome 20 open reading frame 185
84162	KIAA1109	H	0.183029	KIAA1109
2997	GYS1	H	0.183128	glycogen synthase 1 (muscle)
90423	ATP6V1E2	H	0.183424	ATPase, H+ transporting, lysosomal 31kDa, V1 subunit E2
284111	SLC13A5	L	0.183621	solute carrier family 13 (sodium-dependent citrate transporter), member 5
83464	APH1B	L	0.183918	anterior pharynx defective 1 homolog B (C. elegans)
130502	TTC32	L	0.184116	tetratricopeptide repeat domain 32
11337	GABARAP	H	0.184809	GABA(A) receptor-associated protein
5696	PSMB8	H	0.185008	proteasome (prosome, macropain) subunit, beta type, 8 (large multifunctional peptidase 7)
90701	SEC11C	H	0.186303	SEC11 homolog C (S. cerevisiae)
120103	SLC36A4	L	0.186502	solute carrier family 36 (proton/amino acid symporter), member 4
29058	C20orf30	L	0.18972	chromosome 20 open reading frame 30
285590	SH3PXD2B	H	0.190024	SH3 and PX domains 2B
56061	UBFD1	H	0.190531	ubiquitin family domain containing 1
1536	CYBB	L	0.190531	cytochrome b-245, beta polypeptide
23518	R3HDM1	H	0.190937	R3H domain containing 1
63974	NEUROD6	L	0.191344	neurogenic differentiation 6
54800	KLHL24	L	0.191956	kelch-like 24 (Drosophila)
411	ARSB	H	0.19229	arylsulfatase B
7267	TTC3	L	0.192569	tetratricopeptide repeat domain 3
84955	NUDCD1	L	0.192774	NudC domain containing 1
81567	TXNDC5	L	0.193389	thioredoxin domain containing 5 (endoplasmic reticulum)
282809	POC1B	L	0.193594	POC1 centriolar protein homolog B (Chlamydomonas)
1355	COX15	L	0.193594	COX15 homolog, cytochrome c oxidase assembly protein (yeast)
53407	STX18	H	0.194211	syntaxin 18
10694	CCT8	H	0.194623	chaperonin containing TCP1, subunit 8 (theta)
9583	ENTPD4	L	0.194623	ectonucleoside triphosphate diphosphohydrolase 4
23038	WDTC1	H	0.194727	WD and tetratricopeptide repeats 1
6656	SOX1	H	0.194933	SRY (sex determining region Y)-box 1
221191	PRSS54	H	0.195139	protease, serine, 54
149603	RNF187	H	0.195657	ring finger protein 187
431705	ASTL	H	0.195864	astacin-like metallo-endopeptidase (M12 family)
257106	ARHGAP30	H	0.196902	Rho GTPase activating protein 30
27445	PCLO	H	0.196902	piccolo (presynaptic cytomatrix protein)
425054	VCX3B	H	0.196922	variable charge, X-linked 3B
25994	HIGD1A	H	0.197986	HIG1 hypoxia inducible domain family, member 1A
7181	NR2C1	L	0.198466	nuclear receptor subfamily 2, group C, member 1
124359	CDYL2	H	0.198989	chromodomain protein, Y-like 2
25886	POC1A	H	0.199304	POC1 centriolar protein homolog A (Chlamydomonas)
2700	GJA3	H	0.199619	gap junction protein, alpha 3, 46kDa
25895	METTL21B	H	0.199724	methyltransferase like 21B
137886	UBXN2B	H	0.200355	UBX domain protein 2B
197	AHSG	H	0.200461	alpha-2-HS-glycoprotein
336	APOA2	H	0.200461	apolipoprotein A-II
150353	DNAJB7	L	0.200566	DnaJ (Hsp40) homolog, subfamily B, member 7
7405	UVRAG	L	0.201094	UV radiation resistance associated gene
23759	PPIL2	H	0.201094	peptidylprolyl isomerase (cyclophilin)-like 2
6734	SRPR	H	0.201312	signal recognition particle receptor (docking protein)
140461	ASB8	H	0.202046	ankyrin repeat and SOCS box containing 8
84708	LNX1	H	0.202152	ligand of numb-protein X 1
253017	TECRL	H	0.20364	trans-2,3-enoyl-CoA reductase-like
3250	HPR	H	0.203696	haptoglobin-related protein
5828	PEX2	L	0.204494	peroxisomal biogenesis factor 2
1212	CLTB	H	0.204677	clathrin, light chain B
1943	EFNA2	H	0.205136	ephrin-A2
90410	IFT20	H	0.205333	intraflagellar transport 20 homolog (Chlamydomonas)
23376	KIAA0776	L	0.20535	KIAA0776
25940	FAM98A	L	0.20535	family with sequence similarity 98, member A
975	CD81	H	0.20535	CD81 molecule
11177	BAZ1A	L	0.205565	bromodomain adjacent to zinc finger domain, 1A
114884	OSBPL10	H	0.205779	oxysterol binding protein-like 10
57617	VPS18	H	0.205887	vacuolar protein sorting 18 homolog (S. cerevisiae)
283254	HARBI1	L	0.206209	harbinger transposase derived 1
26256	CABYR	H	0.206425	calcium binding tyrosine-(Y)-phosphorylation regulated
10123	ARL4C	H	0.206532	ADP-ribosylation factor-like 4C
10791	VAMP5	H	0.206532	vesicle-associated membrane protein 5 (myobrevin)
26259	FBXW8	H	0.207719	F-box and WD repeat domain containing 8
8602	NOP14	L	0.207719	NOP14 nucleolar protein homolog (yeast)
54815	GATAD2A	L	0.208044	GATA zinc finger domain containing 2A
165324	UBXN2A	L	0.208369	UBX domain protein 2A
342897	NCCRP1	H	0.208369	non-specific cytotoxic cell receptor protein 1 homolog (zebrafish)
55554	KLK15	H	0.208694	kallikrein-related peptidase 15
4337	MOCS1	H	0.208694	molybdenum cofactor synthesis 1
160065	PATE1	L	0.208911	prostate and testis expressed 1
10933	MORF4L1	H	0.208911	mortality factor 4 like 1
9861	PSMD6	H	0.209346	proteasome (prosome, macropain) 26S subunit, non-ATPase, 6
3848	KRT1	H	0.209346	keratin 1
147323	STARD6	H	0.209781	StAR-related lipid transfer (START) domain containing 6
4065	LY75	L	0.20989	lymphocyte antigen 75
10787	NCKAP1	L	0.210653	NCK-associated protein 1
26121	PRPF31	H	0.210653	PRP31 pre-mRNA processing factor 31 homolog (S. cerevisiae)
163589	TDRD5	L	0.210653	tudor domain containing 5
7511	XPNPEP1	H	0.211196	X-prolyl aminopeptidase (aminopeptidase P) 1, soluble
6047	RNF4	L	0.21131	ring finger protein 4
11076	TPPP	H	0.211419	tubulin polymerization promoting protein
25793	FBXO7	H	0.211529	F-box protein 7
10868	USP20	H	0.211857	ubiquitin specific peptidase 20
6819	SULT1C2	H	0.211967	sulfotransferase family, cytosolic, 1C, member 2
390594	KBTBD13	H	0.212406	kelch repeat and BTB (POZ) domain containing 13
4643	MYO1E	L	0.212427	myosin IE
79089	TMUB2	H	0.212736	transmembrane and ubiquitin-like domain containing 2
152002	C3orf21	H	0.212736	chromosome 3 open reading frame 21
10042	HMGXB4	H	0.212956	HMG box domain containing 4
374868	ATP9B	H	0.213066	ATPase, class II, type 9B
2319	FLOT2	H	0.21417	flotillin 2
55572	FOXRED1	H	0.214945	FAD-dependent oxidoreductase domain containing 1
145173	B3GALTL	L	0.215056	beta 1,3-galactosyltransferase-like
28962	OSTM1	L	0.215499	osteopetrosis associated transmembrane protein 1
55062	WIPI1	H	0.215833	WD repeat domain, phosphoinositide interacting 1
253175	CDY1B	H	0.215833	chromodomain protein, Y-linked, 1B
9129	PRPF3	L	0.215944	PRP3 pre-mRNA processing factor 3 homolog (S. cerevisiae)
10885	WDR3	L	0.216166	WD repeat domain 3
200185	KRTCAP2	H	0.216835	keratinocyte associated protein 2
1370	CPN2	H	0.217058	carboxypeptidase N, polypeptide 2
8405	SPOP	H	0.21717	speckle-type POZ protein
120227	CYP2R1	H	0.21717	cytochrome P450, family 2, subfamily R, polypeptide 1
54532	USP53	H	0.217617	ubiquitin specific peptidase 53
23335	WDR7	H	0.21784	WD repeat domain 7
201254	STRA13	H	0.218176	stimulated by retinoic acid 13 homolog (mouse)
284654	RSPO1	H	0.218512	R-spondin homolog (Xenopus laevis)
283237	TTC9C	L	0.218512	tetratricopeptide repeat domain 9C
51255	RNF181	H	0.218512	ring finger protein 181
140460	ASB7	L	0.219186	ankyrin repeat and SOCS box containing 7
114818	KLHL29	H	0.219186	kelch-like 29 (Drosophila)
8674	VAMP4	L	0.220087	vesicle-associated membrane protein 4
10456	HAX1	L	0.220087	HCLS1 associated protein X-1
114793	FMNL2	H	0.220312	formin-like 2
10856	RUVBL2	H	0.220538	RuvB-like 2 (E. coli)
285671	RNF180	L	0.220764	ring finger protein 180
27131	SNX5	L	0.220877	sorting nexin 5
3792	KEL	H	0.220877	Kell blood group, metallo-endopeptidase
8638	OASL	H	0.221103	2'-5'-oligoadenylate synthetase-like
7542	ZFPL1	H	0.221216	zinc finger protein-like 1
333	APLP1	H	0.221329	amyloid beta (A4) precursor-like protein 1
27130	INVS	L	0.221669	inversin
9021	SOCS3	H	0.222009	suppressor of cytokine signaling 3
4973	OLR1	L	0.222236	oxidized low density lipoprotein (lectin-like) receptor 1
10788	IQGAP2	L	0.223259	IQ motif containing GTPase activating protein 2
842	CASP9	H	0.22433	caspase 9, apoptosis-related cysteine peptidase
29071	C1GALT1C1	H	0.224401	C1GALT1-specific chaperone 1
1654	DDX3X	L	0.224515	DEAD (Asp-Glu-Ala-Asp) box polypeptide 3, X-linked
5362	PLXNA2	H	0.224629	plexin A2
138050	HGSNAT	L	0.224858	heparan-alpha-glucosaminide N-acetyltransferase
255022	CALHM1	H	0.224973	calcium homeostasis modulator 1
55593	OTUD5	L	0.224973	OTU domain containing 5
5648	MASP1	L	0.225087	mannan-binding lectin serine peptidase 1 (C4/C2 activating component of Ra-reactive factor)
858	CAV2	L	0.225087	caveolin 2
2804	GOLGB1	H	0.225546	golgin B1
23025	UNC13A	H	0.226005	unc-13 homolog A (C. elegans)
9643	MORF4L2	L	0.226005	mortality factor 4 like 2
58528	RRAGD	H	0.22635	Ras-related GTP binding D
85479	DNAJC5B	H	0.226695	DnaJ (Hsp40) homolog, subfamily C, member 5 beta
153769	SH3RF2	H	0.227156	SH3 domain containing ring finger 2
25983	NGDN	H	0.22808	neuroguidin, EIF4E binding protein
84851	TRIM52	H	0.228311	tripartite motif containing 52
645142	PPIAL4D	H	0.228612	peptidylprolyl isomerase A (cyclophilin A)-like 4D
9929	JOSD1	H	0.229006	Josephin domain containing 1
221656	KDM1B	L	0.229819	lysine (K)-specific demethylase 1B
389856	USP27X	L	0.230401	ubiquitin specific peptidase 27, X-linked
154865	IQUB	L	0.230634	IQ motif and ubiquitin domain containing
389898	UBE2NL	H	0.230984	ubiquitin-conjugating enzyme E2N-like
154791	C7orf55	H	0.231218	chromosome 7 open reading frame 55
645402	USP17L4	H	0.231259	ubiquitin specific peptidase 17-like 4
142685	ASB15	H	0.232036	ankyrin repeat and SOCS box containing 15
29091	STXBP6	L	0.23227	syntaxin binding protein 6 (amisyn)
10713	USP39	H	0.232388	ubiquitin specific peptidase 39
51506	UFC1	H	0.232974	ubiquitin-fold modifier conjugating enzyme 1
9526	MPDU1	H	0.233491	mannose-P-dolichol utilization defect 1
253827	MSRB3	H	0.233561	methionine sulfoxide reductase B3
29887	SNX10	L	0.233797	sorting nexin 10
3273	HRG	L	0.234032	histidine-rich glycoprotein
25771	TBC1D22A	H	0.234268	TBC1 domain family, member 22A
10625	IVNS1ABP	L	0.234622	influenza virus NS1A binding protein
79738	BBS10	H	0.234622	Bardet-Biedl syndrome 10
221613	HIST1H2AA	H	0.234622	histone cluster 1, H2aa
55284	UBE2W	H	0.234622	ubiquitin-conjugating enzyme E2W (putative)
1678	TIMM8A	H	0.234647	translocase of inner mitochondrial membrane 8 homolog A (yeast)
23321	TRIM2	H	0.235212	tripartite motif containing 2
3697	ITIH1	H	0.235212	inter-alpha (globulin) inhibitor H1
123103	KLHL33	H	0.235449	kelch-like 33 (Drosophila)
80267	EDEM3	H	0.235567	ER degradation enhancer, mannosidase alpha-like 3
80724	ACAD10	H	0.236278	acyl-CoA dehydrogenase family, member 10
9407	TMPRSS11D	H	0.237704	transmembrane protease, serine 11D
84447	SYVN1	H	0.237823	synovial apoptosis inhibitor 1, synoviolin
283807	FBXL22	H	0.238061	F-box and leucine-rich repeat protein 22
168451	THAP5	L	0.239136	THAP domain containing 5
908	CCT6A	L	0.239255	chaperonin containing TCP1, subunit 6A (zeta 1)
317772	HIST2H2AB	H	0.239375	histone cluster 2, H2ab
6950	TCP1	L	0.239854	t-complex 1
84282	RNF135	H	0.240094	ring finger protein 135
2773	GNAI3	L	0.240334	guanine nucleotide binding protein (G protein), alpha inhibiting activity polypeptide 3
26234	FBXL5	L	0.240934	F-box and leucine-rich repeat protein 5
8027	STAM	L	0.241055	signal transducing adaptor molecule (SH3 domain and ITAM motif) 1
8341	HIST1H2BN	H	0.241094	histone cluster 1, H2bn
5611	DNAJC3	H	0.241175	DnaJ (Hsp40) homolog, subfamily C, member 3
285237	C3orf38	H	0.241536	chromosome 3 open reading frame 38
83943	IMMP2L	H	0.241656	IMP2 inner mitochondrial membrane peptidase-like (S. cerevisiae)
26267	FBXO10	H	0.242139	F-box protein 10
5768	QSOX1	H	0.243226	quiescin Q6 sulfhydryl oxidase 1
11015	KDELR3	H	0.243226	KDEL (Lys-Asp-Glu-Leu) endoplasmic reticulum protein retention receptor 3
1770	DNAH9	H	0.243953	dynein, axonemal, heavy chain 9
27342	RABGEF1	L	0.243953	RAB guanine nucleotide exchange factor (GEF) 1
8836	GGH	L	0.244075	gamma-glutamyl hydrolase (conjugase, folylpolygammaglutamyl hydrolase)
54557	SGTB	L	0.244196	small glutamine-rich tetratricopeptide repeat (TPR)-containing, beta
162333	MARCH10	L	0.244439	membrane-associated ring finger (C3HC4) 10
7706	TRIM25	H	0.244439	tripartite motif containing 25
8372	HYAL3	H	0.244439	hyaluronoglucosaminidase 3
9128	PRPF4	L	0.244682	PRP4 pre-mRNA processing factor 4 homolog (yeast)
2720	GLB1	H	0.245046	galactosidase, beta 1
10053	AP1M2	H	0.24529	adaptor-related protein complex 1, mu 2 subunit
10466	COG5	L	0.245533	component of oligomeric golgi complex 5
23345	SYNE1	H	0.245899	spectrin repeat containing, nuclear envelope 1
112611	RWDD2A	H	0.246876	RWD domain containing 2A
58158	NEUROD4	L	0.246876	neurogenic differentiation 4
47	ACLY	H	0.247366	ATP citrate lyase
10476	ATP5H	L	0.248224	ATP synthase, H+ transporting, mitochondrial Fo complex, subunit d
9509	ADAMTS2	H	0.24847	ADAM metallopeptidase with thrombospondin type 1 motif, 2
57093	TRIM49	H	0.250441	tripartite motif containing 49
22931	RAB18	L	0.250564	RAB18, member RAS oncogene family
63891	RNF123	H	0.250935	ring finger protein 123
3445	IFNA8	H	0.252326	interferon, alpha 8
84232	MAF1	L	0.253169	MAF1 homolog (S. cerevisiae)
401548	SNX30	H	0.253418	sorting nexin family member 30
9958	USP15	H	0.253792	ubiquitin specific peptidase 15
11016	ATF7	L	0.253916	activating transcription factor 7
5896	RAG1	H	0.254166	recombination activating gene 1
23398	PPWD1	L	0.254166	peptidylprolyl isomerase domain and WD repeat containing 1
23111	SPG20	L	0.255166	spastic paraplegia 20 (Troyer syndrome)
157574	FBXO16	H	0.256294	F-box protein 16
3299	HSF4	H	0.257174	heat shock transcription factor 4
23190	UBXN4	H	0.257174	UBX domain protein 4
28970	C11orf54	H	0.257425	chromosome 11 open reading frame 54
11196	SEC23IP	L	0.257551	SEC23 interacting protein
58477	SRPRB	L	0.257551	signal recognition particle receptor, B subunit
1203	CLN5	H	0.25856	ceroid-lipofuscinosis, neuronal 5
10652	YKT6	H	0.259826	YKT6 v-SNARE homolog (S. cerevisiae)
124872	B4GALNT2	L	0.260079	beta-1,4-N-acetyl-galactosaminyl transferase 2
7188	TRAF5	H	0.260079	TNF receptor-associated factor 5
11261	CHP	H	0.260333	calcium binding protein P22
116362	RBP7	H	0.260333	retinol binding protein 7, cellular
517	ATP5G2	H	0.260333	ATP synthase, H+ transporting, mitochondrial Fo complex, subunit C2 (subunit 9)
25818	KLK5	H	0.260587	kallikrein-related peptidase 5
9776	ATG13	H	0.260587	ATG13 autophagy related 13 homolog (S. cerevisiae)
2736	GLI2	H	0.261095	GLI family zinc finger 2
140766	ADAMTS14	H	0.261222	ADAM metallopeptidase with thrombospondin type 1 motif, 14
10682	EBP	H	0.261731	emopamil binding protein (sterol isomerase)
83892	KCTD10	H	0.263519	potassium channel tetramerisation domain containing 10
9100	USP10	L	0.263775	ubiquitin specific peptidase 10
58505	OSTC	L	0.263918	oligosaccharyltransferase complex subunit
29028	ATAD2	H	0.264544	ATPase family, AAA domain containing 2
2801	GOLGA2	H	0.264801	golgin A2
5664	PSEN2	H	0.264929	presenilin 2 (Alzheimer disease 4)
151827	LRRC34	L	0.265572	leucine rich repeat containing 34
7280	TUBB2A	L	0.265623	tubulin, beta 2A
283989	TSEN54	H	0.265701	tRNA splicing endonuclease 54 homolog (S. cerevisiae)
150372	NFAM1	H	0.265958	NFAT activating protein with ITAM motif 1
340485	ACER2	L	0.266603	alkaline ceramidase 2
3931	LCAT	H	0.267248	lecithin-cholesterol acyltransferase
4247	MGAT2	L	0.267636	mannosyl (alpha-1,6-)-glycoprotein beta-1,2-N-acetylglucosaminyltransferase
27283	TINAG	H	0.267766	tubulointerstitial nephritis antigen
1200	TPP1	H	0.267766	tripeptidyl peptidase I
92960	PEX11G	H	0.267863	peroxisomal biogenesis factor 11 gamma
57094	CPA6	H	0.268024	carboxypeptidase A6
120526	DNAJC24	L	0.268154	DnaJ (Hsp40) homolog, subfamily C, member 24
10126	DNAL4	H	0.268283	dynein, axonemal, light chain 4
25870	SUMF2	H	0.268283	sulfatase modifying factor 2
9246	UBE2L6	H	0.268392	ubiquitin-conjugating enzyme E2L 6
55295	KLHL26	H	0.268802	kelch-like 26 (Drosophila)
151790	WDR49	L	0.269321	WD repeat domain 49
10107	TRIM10	H	0.269321	tripartite motif containing 10
7494	XBP1	L	0.270102	X-box binding protein 1
4804	NGFR	H	0.270102	nerve growth factor receptor
27247	NFU1	H	0.270515	NFU1 iron-sulfur cluster scaffold homolog (S. cerevisiae)
9066	SYT7	H	0.270623	synaptotagmin VII
51136	RNFT1	H	0.271928	ring finger protein, transmembrane 1
8237	USP11	H	0.274289	ubiquitin specific peptidase 11
5720	PSME1	L	0.27442	proteasome (prosome, macropain) activator subunit 1 (PA28 alpha)
25924	MYRIP	H	0.274815	myosin VIIA and Rab interacting protein
90780	PYGO2	H	0.275079	pygopus homolog 2 (Drosophila)
10492	SYNCRIP	L	0.275871	synaptotagmin binding, cytoplasmic RNA interacting protein
26521	TIMM8B	H	0.276267	translocase of inner mitochondrial membrane 8 homolog B (yeast)
2145	EZH1	H	0.276267	enhancer of zeste homolog 1 (Drosophila)
3394	IRF8	L	0.276664	interferon regulatory factor 8
90861	HN1L	L	0.277193	hematological and neurological expressed 1-like
84669	USP32	L	0.27852	ubiquitin specific peptidase 32
387082	SUMO4	H	0.279186	SMT3 suppressor of mif two 3 homolog 4 (S. cerevisiae)
26031	OSBPL3	L	0.279585	oxysterol binding protein-like 3
2329	FMO4	H	0.279852	flavin containing monooxygenase 4
79960	PHF17	H	0.280483	PHD finger protein 17
8468	FKBP6	L	0.280519	FK506 binding protein 6, 36kDa
57602	USP36	H	0.280519	ubiquitin specific peptidase 36
9516	LITAF	H	0.280519	lipopolysaccharide-induced TNF factor
64794	DDX31	H	0.28092	DEAD (Asp-Glu-Ala-Asp) box polypeptide 31
79441	HAUS3	L	0.281991	HAUS augmin-like complex, subunit 3
868	CBLB	L	0.282125	Cas-Br-M (murine) ecotropic retroviral transforming sequence b
51132	RLIM	L	0.283603	ring finger protein, LIM domain interacting
3622	ING2	L	0.284141	inhibitor of growth family, member 2
389208	TMPRSS11F	L	0.284276	transmembrane protease, serine 11F
51643	TMBIM4	L	0.284411	transmembrane BAX inhibitor motif containing 4
2328	FMO3	H	0.286032	flavin containing monooxygenase 3
130733	TMEM178	H	0.286303	transmembrane protein 178
79157	MFSD11	H	0.286303	major facilitator superfamily domain containing 11
127829	ARL8A	H	0.286574	ADP-ribosylation factor-like 8A
9866	TRIM66	H	0.286574	tripartite motif containing 66
6005	RHAG	H	0.286709	Rh-associated glycoprotein
23654	PLXNB2	H	0.28698	plexin B2
25904	CNOT10	L	0.287358	CCR4-NOT transcription complex, subunit 10
200879	LIPH	H	0.287388	lipase, member H
728369	LOC728369	H	0.287795	similar to deubiquitinating enzyme 3
26958	COPG2	L	0.289293	coatomer protein complex, subunit gamma 2
4438	MSH4	H	0.289293	mutS homolog 4 (E. coli)
51271	UBAP1	H	0.289702	ubiquitin associated protein 1
26276	VPS33B	H	0.289839	vacuolar protein sorting 33 homolog B (yeast)
149954	C20orf186	H	0.289839	chromosome 20 open reading frame 186
54778	RNF111	H	0.290112	ring finger protein 111
25825	BACE2	H	0.290385	beta-site APP-cleaving enzyme 2
116138	KLHDC3	L	0.291069	kelch domain containing 3
26118	WSB1	L	0.291892	WD repeat and SOCS box containing 1
4110	MAGEA11	L	0.293266	melanoma antigen family A, 11
200728	TMEM17	L	0.293404	transmembrane protein 17
9531	BAG3	H	0.293817	BCL2-associated athanogene 3
112770	C1orf85	H	0.294231	chromosome 1 open reading frame 85
9525	VPS4B	L	0.294783	vacuolar protein sorting 4 homolog B (S. cerevisiae)
1510	CTSE	L	0.295059	cathepsin E
255626	HIST1H2BA	H	0.295612	histone cluster 1, H2ba
7805	LAPTM5	H	0.296859	lysosomal protein transmembrane 5
491	ATP2B2	H	0.297554	ATPase, Ca++ transporting, plasma membrane 2
117854	TRIM6	L	0.297832	tripartite motif containing 6
1810	DR1	L	0.29811	down-regulator of transcription 1, TBP-binding (negative cofactor 2)
10313	RTN3	H	0.298249	reticulon 3
23331	TTC28	L	0.298528	tetratricopeptide repeat domain 28
114088	TRIM9	H	0.298667	tripartite motif containing 9
9709	HERPUD1	L	0.298946	homocysteine-inducible, endoplasmic reticulum stress-inducible, ubiquitin-like domain member 1
57563	KLHL8	L	0.299085	kelch-like 8 (Drosophila)
94031	HTRA3	H	0.299225	HtrA serine peptidase 3
374286	CDRT1	H	0.300482	CMT1A duplicated region transcript 1
1434	CSE1L	L	0.301182	CSE1 chromosome segregation 1-like (yeast)
7335	UBE2V1	H	0.301322	ubiquitin-conjugating enzyme E2 variant 1
146760	RTN4RL1	H	0.302164	reticulon 4 receptor-like 1
373	TRIM23	H	0.302304	tripartite motif containing 23
378925	RNF148	L	0.302866	ring finger protein 148
23609	MKRN2	H	0.302866	makorin ring finger protein 2
64167	ERAP2	L	0.303289	endoplasmic reticulum aminopeptidase 2
113791	PIK3IP1	H	0.303429	phosphoinositide-3-kinase interacting protein 1
60559	SPCS3	H	0.304557	signal peptidase complex subunit 3 homolog (S. cerevisiae)
51725	FBXO40	H	0.30484	F-box protein 40
79174	CRELD2	H	0.304981	cysteine-rich with EGF-like domains 2
23194	FBXL7	H	0.305405	F-box and leucine-rich repeat protein 7
2776	GNAQ	H	0.305971	guanine nucleotide binding protein (G protein), q polypeptide
10557	RPP38	L	0.306113	ribonuclease P/MRP 38kDa subunit
320	APBA1	H	0.306396	amyloid beta (A4) precursor protein-binding, family A, member 1
51317	PHF21A	H	0.306963	PHD finger protein 21A
1174	AP1S1	H	0.307105	adaptor-related protein complex 1, sigma 1 subunit
131405	TRIM71	H	0.307389	tripartite motif containing 71
5877	RABIF	H	0.307957	RAB interacting factor
55884	WSB2	H	0.308242	WD repeat and SOCS box containing 2
23566	LPAR3	L	0.30837	lysophosphatidic acid receptor 3
93611	FBXO44	H	0.308811	F-box protein 44
161582	DYX1C1	H	0.309524	dyslexia susceptibility 1 candidate 1
10390	CEPT1	L	0.309667	choline/ethanolamine phosphotransferase 1
10815	CPLX1	H	0.310555	complexin 1
23527	ACAP2	L	0.31124	ArfGAP with coiled-coil, ankyrin repeat and PH domains 2
80273	GRPEL1	H	0.311956	GrpE-like 1, mitochondrial (E. coli)
5715	PSMD9	L	0.312243	proteasome (prosome, macropain) 26S subunit, non-ATPase, 9
90809	TMEM55B	H	0.31368	transmembrane protein 55B
56957	OTUD7B	L	0.31368	OTU domain containing 7B
139341	FUNDC1	L	0.31368	FUN14 domain containing 1
123624	AGBL1	H	0.31368	ATP/GTP binding protein-like 1
134218	DNAJC21	L	0.313824	DnaJ (Hsp40) homolog, subfamily C, member 21
160428	ALDH1L2	L	0.313968	aldehyde dehydrogenase 1 family, member L2
23089	PEG10	H	0.314256	paternally expressed 10
55208	DCUN1D2	L	0.3144	DCN1, defective in cullin neddylation 1, domain containing 2 (S. cerevisiae)
79446	WDR25	H	0.314977	WD repeat domain 25
1746	DLX2	H	0.315266	distal-less homeobox 2
10112	KIF20A	H	0.3157	kinesin family member 20A
78990	OTUB2	H	0.315989	OTU domain, ubiquitin aldehyde binding 2
164832	LONRF2	H	0.316568	LON peptidase N-terminal domain and ring finger 2
196374	KRT78	H	0.316857	keratin 78
10577	NPC2	H	0.317292	Niemann-Pick disease, type C2
2167	FABP4	L	0.317437	fatty acid binding protein 4, adipocyte
115209	OMA1	L	0.317437	OMA1 homolog, zinc metallopeptidase (S. cerevisiae)
5202	PFDN2	H	0.317582	prefoldin subunit 2
6427	SRSF2	L	0.317727	serine/arginine-rich splicing factor 2
84101	USP44	L	0.318308	ubiquitin specific peptidase 44
26273	FBXO3	L	0.31991	F-box protein 3
10282	BET1	H	0.322102	blocked early in transport 1 homolog (S. cerevisiae)
151613	TTC14	L	0.322981	tetratricopeptide repeat domain 14
344805	TMPRSS7	H	0.323568	transmembrane protease, serine 7
265	AMELX	L	0.324156	amelogenin, X-linked
3192	HNRNPU	H	0.324745	heterogeneous nuclear ribonucleoprotein U (scaffold attachment factor A)
2348	FOLR1	H	0.325482	folate receptor 1 (adult)
11311	VPS45	H	0.326072	vacuolar protein sorting 45 homolog (S. cerevisiae)
199857	ALG14	H	0.326367	asparagine-linked glycosylation 14 homolog (S. cerevisiae)
11077	HSF2BP	H	0.326515	heat shock transcription factor 2 binding protein
23390	ZDHHC17	H	0.326663	zinc finger, DHHC-type containing 17
4645	MYO5B	L	0.32681	myosin VB
246213	SLC17A8	H	0.326958	solute carrier family 17 (sodium-dependent inorganic phosphate cotransporter), member 8
4640	MYO1A	H	0.328291	myosin IA
10291	SF3A1	H	0.328588	splicing factor 3a, subunit 1, 120kDa
55207	ARL8B	H	0.329182	ADP-ribosylation factor-like 8B
10952	SEC61B	H	0.329479	Sec61 beta subunit
6810	STX4	H	0.329479	syntaxin 4
2923	PDIA3	L	0.329627	protein disulfide isomerase family A, member 3
3107	HLA-C	H	0.330074	major histocompatibility complex, class I, C
2803	GOLGA4	H	0.33052	golgin A4
10335	MRVI1	L	0.330818	murine retrovirus integration site 1 homolog
8339	HIST1H2BG	H	0.331564	histone cluster 1, H2bg
8678	BECN1	H	0.332161	beclin 1, autophagy related
1427	CRYGS	H	0.332161	crystallin, gamma S
64924	SLC30A5	H	0.332909	solute carrier family 30 (zinc transporter), member 5
343578	ARHGAP40	H	0.332909	Rho GTPase activating protein 40
143630	UBQLNL	H	0.333058	ubiquilin-like
392197	USP17L7	H	0.333358	ubiquitin specific peptidase 17-like 7
89870	TRIM15	H	0.334257	tripartite motif containing 15
27044	SND1	H	0.334407	staphylococcal nuclease and tudor domain containing 1
23650	TRIM29	H	0.334557	tripartite motif containing 29
2771	GNAI2	H	0.334557	guanine nucleotide binding protein (G protein), alpha inhibiting activity polypeptide 2
445372	TRIM6-TRIM34	L	0.334557	TRIM6-TRIM34 readthrough
27314	RAB30	L	0.336211	RAB30, member RAS oncogene family
8342	HIST1H2BM	H	0.336964	histone cluster 1, H2bm
84678	KDM2B	L	0.336965	lysine (K)-specific demethylase 2B
10437	IFI30	H	0.337266	interferon, gamma-inducible protein 30
64418	TMEM168	L	0.337568	transmembrane protein 168
126282	TNFAIP8L1	H	0.33787	tumor necrosis factor, alpha-induced protein 8-like 1
23081	KDM4C	H	0.33787	lysine (K)-specific demethylase 4C
3158	HMGCS2	L	0.338021	3-hydroxy-3-methylglutaryl-CoA synthase 2 (mitochondrial)
81932	HDHD3	H	0.338475	haloacid dehalogenase-like hydrolase domain containing 3
23327	NEDD4L	L	0.338626	neural precursor cell expressed, developmentally down-regulated 4-like
10049	DNAJB6	L	0.340141	DnaJ (Hsp40) homolog, subfamily B, member 6
51465	UBE2J1	H	0.341356	ubiquitin-conjugating enzyme E2, J1 (UBC6 homolog, yeast)
147011	PROCA1	H	0.342117	protein interacting with cyclin A1
8554	PIAS1	L	0.343489	protein inhibitor of activated STAT, 1
27154	BRPF3	H	0.343794	bromodomain and PHD finger containing, 3
164091	PAQR7	H	0.344253	progestin and adipoQ receptor family member VII
2287	FKBP3	L	0.346551	FK506 binding protein 3, 25kDa
51283	BFAR	L	0.347935	bifunctional apoptosis regulator
23380	SRGAP2	L	0.348396	SLIT-ROBO Rho GTPase activating protein 2
79618	HMBOX1	L	0.348551	homeobox containing 1
22826	DNAJC8	H	0.34963	DnaJ (Hsp40) homolog, subfamily C, member 8
199974	CYP4Z1	L	0.350712	cytochrome P450, family 4, subfamily Z, polypeptide 1
824	CAPN2	L	0.350867	calpain 2, (m/II) large subunit
478	ATP1A3	H	0.351176	ATPase, Na+/K+ transporting, alpha 3 polypeptide
57089	ENTPD7	L	0.351176	ectonucleoside triphosphate diphosphohydrolase 7
81545	FBXO38	H	0.351641	F-box protein 38
117289	TAGAP	H	0.351796	T-cell activation RhoGTPase activating protein
7844	RNF103	L	0.352101	ring finger protein 103
871	SERPINH1	H	0.352106	serpin peptidase inhibitor, clade H (heat shock protein 47), member 1, (collagen binding protein 1)
685	BTC	L	0.352882	betacellulin
54552	GNL3L	L	0.353193	guanine nucleotide binding protein-like 3 (nucleolar)-like
91647	ATPAF2	H	0.353504	ATP synthase mitochondrial F1 complex assembly factor 2
119548	PNLIPRP3	L	0.354593	pancreatic lipase-related protein 3
9508	ADAMTS3	H	0.355373	ADAM metallopeptidase with thrombospondin type 1 motif, 3
4850	CNOT4	L	0.355529	CCR4-NOT transcription complex, subunit 4
254240	BPIL2	H	0.355997	bactericidal/permeability-increasing protein-like 2
29095	ORMDL2	H	0.355997	ORM1-like 2 (S. cerevisiae)
83844	USP26	L	0.356309	ubiquitin specific peptidase 26
26224	FBXL3	L	0.356622	F-box and leucine-rich repeat protein 3
129401	NUP35	H	0.356778	nucleoporin 35kDa
2846	LPAR4	H	0.356935	lysophosphatidic acid receptor 4
5125	PCSK5	H	0.356935	proprotein convertase subtilisin/kexin type 5
23463	ICMT	L	0.357248	isoprenylcysteine carboxyl methyltransferase
11012	KLK11	H	0.357561	kallikrein-related peptidase 11
4884	NPTX1	L	0.357717	neuronal pentraxin I
10956	OS9	H	0.358031	osteosarcoma amplified 9, endoplasmic reticulum lectin
54726	OTUD4	L	0.358188	OTU domain containing 4
55379	LRRC59	L	0.358188	leucine rich repeat containing 59
11101	ATE1	H	0.359757	arginyltransferase 1
25831	HECTD1	H	0.359757	HECT domain containing 1
8763	CD164	H	0.360229	CD164 molecule, sialomucin
10965	ACOT2	L	0.360701	acyl-CoA thioesterase 2
22822	PHLDA1	L	0.360701	pleckstrin homology-like domain, family A, member 1
23198	PSME4	L	0.360859	proteasome (prosome, macropain) activator subunit 4
132612	ADAD1	H	0.361489	adenosine deaminase domain containing 1 (testis-specific)
10336	PCGF3	H	0.361647	polycomb group ring finger 3
3601	IL15RA	H	0.362278	interleukin 15 receptor, alpha
84078	KBTBD7	H	0.363859	kelch repeat and BTB (POZ) domain containing 7
29929	ALG6	L	0.363859	asparagine-linked glycosylation 6, alpha-1,3-glucosyltransferase homolog (S. cerevisiae)
203859	ANO5	L	0.364493	anoctamin 5
11236	RNF139	H	0.364493	ring finger protein 139
5303	PIN4	L	0.364652	protein (peptidylprolyl cis/trans isomerase) NIMA-interacting, 4 (parvulin)
57630	SH3RF1	L	0.364652	SH3 domain containing ring finger 1
113612	CYP2U1	H	0.365762	cytochrome P450, family 2, subfamily U, polypeptide 1
839	CASP6	H	0.366716	caspase 6, apoptosis-related cysteine peptidase
84959	UBASH3B	L	0.367831	ubiquitin associated and SH3 domain containing B
3442	IFNA5	L	0.368788	interferon, alpha 5
79666	PLEKHF2	L	0.369267	pleckstrin homology domain containing, family F (with FYVE domain) member 2
7547	ZIC3	L	0.369587	Zic family member 3 (odd-paired homolog, Drosophila)
151230	KLHL23	H	0.370227	kelch-like 23 (Drosophila)
178	AGL	L	0.371669	amylo-alpha-1, 6-glucosidase, 4-alpha-glucanotransferase
23163	GGA3	H	0.37199	golgi-associated, gamma adaptin ear containing, ARF binding protein 3
468	ATF4	L	0.372151	activating transcription factor 4 (tax-responsive enhancer element B67)
121278	TPH2	L	0.372632	tryptophan hydroxylase 2
8775	NAPA	L	0.372903	N-ethylmaleimide-sensitive factor attachment protein, alpha
51258	MRPL51	L	0.373115	mitochondrial ribosomal protein L51
64395	GMCL1	L	0.373115	germ cell-less homolog 1 (Drosophila)
4761	NEUROD2	H	0.373724	neurogenic differentiation 2
54980	C2orf42	H	0.373758	chromosome 2 open reading frame 42
5052	PRDX1	L	0.373758	peroxiredoxin 1
92181	UBTD2	L	0.37408	ubiquitin domain containing 2
146862	UNC45B	L	0.374403	unc-45 homolog B (C. elegans)
51720	UIMC1	L	0.374725	ubiquitin interaction motif containing 1
57685	CACHD1	L	0.37537	cache domain containing 1
51232	CRIM1	H	0.375532	cysteine rich transmembrane BMP regulator 1 (chordin-like)
115677	NOSTRIN	L	0.375855	nitric oxide synthase trafficker
148867	SLC30A7	L	0.376017	solute carrier family 30 (zinc transporter), member 7
10299	MARCH6	H	0.376501	membrane-associated ring finger (C3HC4) 6
79589	RNF128	L	0.376987	ring finger protein 128
5721	PSME2	H	0.377311	proteasome (prosome, macropain) activator subunit 2 (PA28 beta)
2515	ADAM2	H	0.377797	ADAM metallopeptidase domain 2
23007	PLCH1	H	0.378932	phospholipase C, eta 1
10985	GCN1L1	L	0.380884	GCN1 general control of amino-acid synthesis 1-like 1 (yeast)
30845	EHD3	H	0.380884	EH-domain containing 3
10156	RASA4	H	0.381535	RAS p21 protein activator 4
286436	H2BFM	L	0.382188	H2B histone family, member M
60496	AASDHPPT	L	0.382515	aminoadipate-semialdehyde dehydrogenase-phosphopantetheinyl transferase
84945	ABHD13	L	0.382515	abhydrolase domain containing 13
116255	MOGAT1	H	0.383495	monoacylglycerol O-acyltransferase 1
10493	VAT1	H	0.383495	vesicle amine transport protein 1 homolog (T. californica)
130872	AHSA2	H	0.384477	AHA1, activator of heat shock 90kDa protein ATPase homolog 2 (yeast)
113026	PLCD3	H	0.384641	phospholipase C, delta 3
254225	RNF169	L	0.385625	ring finger protein 169
9765	ZFYVE16	L	0.385953	zinc finger, FYVE domain containing 16
7804	LRP8	H	0.386282	low density lipoprotein receptor-related protein 8, apolipoprotein e receptor
388743	CAPN8	H	0.386446	calpain 8
22845	DOLK	H	0.386775	dolichol kinase
7726	TRIM26	H	0.387433	tripartite motif containing 26
26262	TSPAN17	H	0.387598	tetraspanin 17
29953	TRHDE	L	0.389907	thyrotropin-releasing hormone degrading enzyme
128861	C20orf71	L	0.391727	chromosome 20 open reading frame 71
3069	HDLBP	H	0.391727	high density lipoprotein binding protein
283514	SIAH3	H	0.392058	seven in absentia homolog 3 (Drosophila)
11313	LYPLA2	H	0.392075	lysophospholipase II
84186	ZCCHC7	L	0.392887	zinc finger, CCHC domain containing 7
10808	HSPH1	H	0.393054	heat shock 105kDa/110kDa protein 1
150160	CCT8L2	H	0.39322	chaperonin containing TCP1, subunit 8 (theta)-like 2
84735	CNDP1	H	0.395382	carnosine dipeptidase 1 (metallopeptidase M20 family)
10672	GNA13	L	0.395382	guanine nucleotide binding protein (G protein), alpha 13
57484	RNF150	L	0.395715	ring finger protein 150
881	CCIN	H	0.396049	calicin
2595	GANC	H	0.397218	glucosidase, alpha; neutral C
1108	CHD4	H	0.397552	chromodomain helicase DNA binding protein 4
84284	NTPCR	H	0.397719	nucleoside-triphosphatase, cancer-related
10197	PSME3	H	0.398723	proteasome (prosome, macropain) activator subunit 3 (PA28 gamma; Ki)
23378	RRP8	H	0.398723	ribosomal RNA processing 8, methyltransferase, homolog (yeast)
414301	DDI1	L	0.398723	DNA-damage inducible 1 homolog 1 (S. cerevisiae)
643414	LIPK	H	0.399393	lipase, family member K
6747	SSR3	L	0.399393	signal sequence receptor, gamma (translocon-associated protein gamma)
9768	KIAA0101	L	0.4004	KIAA0101
116541	MRPL54	H	0.4004	mitochondrial ribosomal protein L54
23344	ESYT1	H	0.400736	extended synaptotagmin-like protein 1
408050	NOMO3	H	0.400822	NODAL modulator 3
51061	TXNDC11	H	0.40225	thioredoxin domain containing 11
26007	DAK	H	0.40225	dihydroxyacetone kinase 2 homolog (S. cerevisiae)
121457	IKBIP	H	0.402586	IKBKB interacting protein
2395	FXN	H	0.403429	frataxin
81562	LMAN2L	L	0.403516	lectin, mannose-binding 2-like
25777	SUN2	H	0.404611	Sad1 and UNC84 domain containing 2
79047	KCTD15	H	0.404949	potassium channel tetramerisation domain containing 15
8473	OGT	L	0.405456	O-linked N-acetylglucosamine (GlcNAc) transferase (UDP-N-acetylglucosamine:polypeptide-N-acetylglucosaminyl transferase)
4799	NFX1	L	0.405456	nuclear transcription factor, X-box binding 1
10057	ABCC5	H	0.405625	ATP-binding cassette, sub-family C (CFTR/MRP), member 5
51107	APH1A	H	0.406641	anterior pharynx defective 1 homolog A (C. elegans)
10613	ERLIN1	H	0.407829	ER lipid raft associated 1
283748	PLA2G4D	H	0.408168	phospholipase A2, group IVD (cytosolic)
10564	ARFGEF2	L	0.408338	ADP-ribosylation factor guanine nucleotide-exchange factor 2 (brefeldin A-inhibited)
4118	MAL	L	0.409358	mal, T-cell differentiation protein
4210	MEFV	H	0.409869	Mediterranean fever
23033	DOPEY1	L	0.41038	dopey family member 1
150365	MEI1	H	0.411062	meiosis inhibitor 1
55244	SLC47A1	L	0.411232	solute carrier family 47, member 1
140458	ASB5	H	0.411915	ankyrin repeat and SOCS box containing 5
23471	TRAM1	L	0.412427	translocation associated membrane protein 1
2638	GC	L	0.413111	group-specific component (vitamin D binding protein)
8878	SQSTM1	H	0.413282	sequestosome 1
51279	C1RL	H	0.413967	complement component 1, r subcomponent-like
53840	TRIM34	L	0.414104	tripartite motif containing 34
28983	TMPRSS11E	H	0.416713	transmembrane protease, serine 11E
4125	MAN2B1	H	0.416885	mannosidase, alpha, class 2B, member 1
285498	RNF212	H	0.416885	ring finger protein 212
55632	G2E3	L	0.417401	G2/M-phase specific E3 ubiquitin protein ligase
10981	RAB32	H	0.417786	RAB32, member RAS oncogene family
6782	HSPA13	H	0.418434	heat shock protein 70kDa family, member 13
2733	GLE1	H	0.418607	GLE1 RNA export mediator homolog (yeast)
9896	FIG4	L	0.419814	FIG4 homolog, SAC1 lipid phosphatase domain containing (S. cerevisiae)
439996	IFIT1B	H	0.42016	interferon-induced protein with tetratricopeptide repeats 1B
2138	EYA1	L	0.420506	eyes absent homolog 1 (Drosophila)
1794	DOCK2	H	0.420851	dedicator of cytokinesis 2
115703	ARHGAP33	H	0.421197	Rho GTPase activating protein 33
9616	RNF7	H	0.422583	ring finger protein 7
30061	SLC40A1	L	0.423277	solute carrier family 40 (iron-regulated transporter), member 1
197131	UBR1	L	0.42345	ubiquitin protein ligase E3 component n-recognin 1
253782	LASS6	L	0.423971	LAG1 homolog, ceramide synthase 6
119587	CPXM2	H	0.424145	carboxypeptidase X (M14 family), member 2
114780	PKD1L2	H	0.424319	polycystic kidney disease 1-like 2
3920	LAMP2	L	0.425362	lysosomal-associated membrane protein 2
29923	C7orf68	H	0.425536	chromosome 7 open reading frame 68
10457	GPNMB	H	0.42571	glycoprotein (transmembrane) nmb
114792	KLHL32	H	0.426407	kelch-like 32 (Drosophila)
55033	FKBP14	L	0.426581	FK506 binding protein 14, 22 kDa
134957	STXBP5	L	0.427104	syntaxin binding protein 5 (tomosyn)
26520	TIMM9	L	0.427628	translocase of inner mitochondrial membrane 9 homolog (yeast)
7337	UBE3A	L	0.427802	ubiquitin protein ligase E3A
24140	FTSJ1	H	0.427977	FtsJ homolog 1 (E. coli)
55152	DALRD3	H	0.428152	DALR anticodon binding domain containing 3
8492	PRSS12	L	0.429551	protease, serine, 12 (neurotrypsin, motopsin)
161835	FSIP1	L	0.430076	fibrous sheath interacting protein 1
2055	CLN8	L	0.430426	ceroid-lipofuscinosis, neuronal 8 (epilepsy, progressive with mental retardation)
1735	DIO3	H	0.430426	deiodinase, iodothyronine, type III
283518	KCNRG	L	0.431127	potassium channel regulator
55238	SLC38A7	H	0.431303	solute carrier family 38, member 7
150275	CCDC117	L	0.431478	coiled-coil domain containing 117
11325	DDX42	H	0.431829	DEAD (Asp-Glu-Ala-Asp) box polypeptide 42
25956	SEC31B	H	0.432356	SEC31 homolog B (S. cerevisiae)
92291	CAPN13	L	0.432356	calpain 13
10730	YME1L1	H	0.432356	YME1-like 1 (S. cerevisiae)
51110	LACTB2	L	0.432532	lactamase, beta 2
1650	DDOST	H	0.432708	dolichyl-diphosphooligosaccharide--protein glycosyltransferase
7469	WHSC2	H	0.432708	Wolf-Hirschhorn syndrome candidate 2
8710	SERPINB7	L	0.432883	serpin peptidase inhibitor, clade B (ovalbumin), member 7
2137	EXTL3	H	0.433059	exostoses (multiple)-like 3
345062	PRSS48	L	0.433059	protease, serine, 48
51201	ZDHHC2	L	0.433939	zinc finger, DHHC-type containing 2
4647	MYO7A	H	0.434115	myosin VIIA
29940	DSE	L	0.435702	dermatan sulfate epimerase
64224	HERPUD2	L	0.436055	HERPUD family member 2
55293	UEVLD	L	0.436231	UEV and lactate/malate dehyrogenase domains
92979	MARCH9	H	0.436231	membrane-associated ring finger (C3HC4) 9
285440	CYP4V2	L	0.436761	cytochrome P450, family 4, subfamily V, polypeptide 2
344558	SH3RF3	H	0.436761	SH3 domain containing ring finger 3
6811	STX5	H	0.437292	syntaxin 5
746	C11orf10	L	0.437645	chromosome 11 open reading frame 10
5204	PFDN5	H	0.437645	prefoldin subunit 5
79962	DNAJC22	H	0.437999	DnaJ (Hsp40) homolog, subfamily C, member 22
54414	SIAE	L	0.437999	sialic acid acetylesterase
166379	BBS12	H	0.438708	Bardet-Biedl syndrome 12
84871	AGBL4	L	0.439771	ATP/GTP binding protein-like 4
283208	P4HA3	H	0.440304	prolyl 4-hydroxylase, alpha polypeptide III
5275	SERPINB13	L	0.441725	serpin peptidase inhibitor, clade B (ovalbumin), member 13
3443	IFNA6	L	0.4421	interferon, alpha 6
8725	C19orf2	L	0.442281	chromosome 19 open reading frame 2
9886	RHOBTB1	L	0.444755	Rho-related BTB domain containing 1
9296	ATP6V1F	H	0.445112	ATPase, H+ transporting, lysosomal 14kDa, V1 subunit F
27309	ZNF330	L	0.44547	zinc finger protein 330
143282	FGFBP3	L	0.445648	fibroblast growth factor binding protein 3
57156	TMEM63C	H	0.445827	transmembrane protein 63C
92912	UBE2Q2	H	0.445827	ubiquitin-conjugating enzyme E2Q family member 2
26103	LRIT1	H	0.446006	leucine-rich repeat, immunoglobulin-like and transmembrane domains 1
92552	ATXN3L	L	0.446543	ataxin 3-like
55975	KLHL7	L	0.447259	kelch-like 7 (Drosophila)
11316	COPE	H	0.447976	coatomer protein complex, subunit epsilon
23041	MON2	L	0.448334	MON2 homolog (S. cerevisiae)
9920	KBTBD11	L	0.448334	kelch repeat and BTB (POZ) domain containing 11
1071	CETP	H	0.448693	cholesteryl ester transfer protein, plasma
7347	UCHL3	L	0.448693	ubiquitin carboxyl-terminal esterase L3 (ubiquitin thiolesterase)
253982	ASPHD1	H	0.448693	aspartate beta-hydroxylase domain containing 1
284996	RNF149	H	0.449232	ring finger protein 149
81542	TMX1	L	0.449771	thioredoxin-related transmembrane protein 1
23608	MKRN1	H	0.45013	makorin ring finger protein 1
64215	DNAJC1	L	0.45067	DnaJ (Hsp40) homolog, subfamily C, member 1
80818	ZNF436	L	0.45085	zinc finger protein 436
7187	TRAF3	H	0.452471	TNF receptor-associated factor 3
55972	SLC25A40	L	0.453012	solute carrier family 25, member 40
91074	ANKRD30A	H	0.454095	ankyrin repeat domain 30A
84079	ANKRD27	L	0.45518	ankyrin repeat domain 27 (VPS9 domain)
4908	NTF3	L	0.45518	neurotrophin 3
4939	OAS2	H	0.455542	2'-5'-oligoadenylate synthetase 2, 69/71kDa
644591	PPIAL4G	H	0.456026	peptidylprolyl isomerase A (cyclophilin A)-like 4G
26503	SLC17A5	H	0.456266	solute carrier family 17 (anion/sugar transporter), member 5
85363	TRIM5	H	0.456629	tripartite motif containing 5
131118	DNAJC19	L	0.45681	DnaJ (Hsp40) homolog, subfamily C, member 19
51277	DNAJC27	L	0.456991	DnaJ (Hsp40) homolog, subfamily C, member 27
57690	TNRC6C	L	0.456991	trinucleotide repeat containing 6C
146456	TMED6	H	0.457536	transmembrane emp24 protein transport domain containing 6
51676	ASB2	H	0.45808	ankyrin repeat and SOCS box containing 2
22996	TTC39A	L	0.458443	tetratricopeptide repeat domain 39A
286749	STON1-GTF2A1L	L	0.458807	STON1-GTF2A1L readthrough
54834	GDAP2	L	0.46008	ganglioside induced differentiation associated protein 2
23531	MMD	H	0.46099	monocyte to macrophage differentiation-associated
84938	ATG4C	L	0.461537	ATG4 autophagy related 4 homolog C (S. cerevisiae)
6764	ST5	H	0.46172	suppression of tumorigenicity 5
65082	VPS33A	L	0.46318	vacuolar protein sorting 33 homolog A (S. cerevisiae)
55968	NSFL1C	H	0.463276	NSFL1 (p97) cofactor (p47)
414061	DNAJB3	H	0.463363	DnaJ (Hsp40) homolog, subfamily B, member 3
55159	RFWD3	L	0.463363	ring finger and WD repeat domain 3
3818	KLKB1	L	0.463728	kallikrein B, plasma (Fletcher factor) 1
10402	ST3GAL6	H	0.463911	ST3 beta-galactoside alpha-2,3-sialyltransferase 6
83693	HSDL1	H	0.464826	hydroxysteroid dehydrogenase like 1
3310	HSPA6	H	0.466291	heat shock 70kDa protein 6 (HSP70B')
4360	MRC1	L	0.466842	mannose receptor, C type 1
10938	EHD1	H	0.467209	EH-domain containing 1
55236	UBA6	L	0.467392	ubiquitin-like modifier activating enzyme 6
2861	GPR37	H	0.467944	G protein-coupled receptor 37 (endothelin receptor type B-like)
10670	RRAGA	H	0.467944	Ras-related GTP binding A
83450	LRRC48	H	0.468495	leucine rich repeat containing 48
56675	NRIP3	L	0.468679	nuclear receptor interacting protein 3
9063	PIAS2	H	0.469967	protein inhibitor of activated STAT, 2
11166	SOX21	H	0.470151	SRY (sex determining region Y)-box 21
55823	VPS11	H	0.470888	vacuolar protein sorting 11 homolog (S. cerevisiae)
339906	PRSS42	L	0.471811	protease, serine, 42
29116	MYLIP	H	0.471995	myosin regulatory light chain interacting protein
26515	FXC1	H	0.472734	fracture callus 1 homolog (rat)
23301	EHBP1	L	0.472734	EH domain binding protein 1
169166	SNX31	L	0.473844	sorting nexin 31
5118	PCOLCE	H	0.473844	procollagen C-endopeptidase enhancer
319101	KRT73	H	0.474584	keratin 73
3081	HGD	L	0.474584	homogentisate 1,2-dioxygenase
79018	C17orf39	H	0.476438	chromosome 17 open reading frame 39
2134	EXTL1	H	0.476623	exostoses (multiple)-like 1
23155	CLCC1	L	0.478481	chloride channel CLIC-like 1
26091	HERC4	L	0.478667	hect domain and RLD 4
84061	MAGT1	L	0.479226	magnesium transporter 1
1382	CRABP2	H	0.479598	cellular retinoic acid binding protein 2
128989	C22orf25	H	0.479784	chromosome 22 open reading frame 25
10332	CLEC4M	H	0.479971	C-type lectin domain family 4, member M
57102	C12orf4	L	0.480157	chromosome 12 open reading frame 4
84129	ACAD11	L	0.480235	acyl-CoA dehydrogenase family, member 11
27031	NPHP3	L	0.480716	nephronophthisis 3 (adolescent)
10549	PRDX4	H	0.480903	peroxiredoxin 4
3012	HIST1H2AE	L	0.480903	histone cluster 1, H2ae
64839	FBXL17	L	0.481089	F-box and leucine-rich repeat protein 17
55930	MYO5C	H	0.481462	myosin VC
1983	EIF5	H	0.481649	eukaryotic translation initiation factor 5
64750	SMURF2	H	0.482023	SMAD specific E3 ubiquitin protein ligase 2
391712	TRIM61	L	0.482396	tripartite motif containing 61
7325	UBE2E2	L	0.483331	ubiquitin-conjugating enzyme E2E 2 (UBC4/5 homolog, yeast)
123	PLIN2	H	0.483331	perilipin 2
54788	DNAJB12	H	0.484266	DnaJ (Hsp40) homolog, subfamily B, member 12
28234	SLCO1B3	L	0.485953	solute carrier organic anion transporter family, member 1B3
55254	TMEM39A	L	0.486141	transmembrane protein 39A
329	BIRC2	L	0.486516	baculoviral IAP repeat containing 2
10607	TBL3	H	0.487079	transducin (beta)-like 3
492	ATP2B3	H	0.487455	ATPase, Ca++ transporting, plasma membrane 3
7031	TFF1	H	0.487643	trefoil factor 1
64326	RFWD2	L	0.487831	ring finger and WD repeat domain 2
84826	SFT2D3	H	0.487831	SFT2 domain containing 3
57222	ERGIC1	H	0.488207	endoplasmic reticulum-golgi intermediate compartment (ERGIC) 1
26872	STEAP1	L	0.488583	six transmembrane epithelial antigen of the prostate 1
22999	RIMS1	H	0.488959	regulating synaptic membrane exocytosis 1
153339	TMEM167A	H	0.489524	transmembrane protein 167A
7126	TNFAIP1	H	0.489524	tumor necrosis factor, alpha-induced protein 1 (endothelial)
1861	TOR1A	L	0.491032	torsin family 1, member A (torsin A)
4653	MYOC	H	0.491787	myocilin, trabecular meshwork inducible glucocorticoid response
1465	CSRP1	H	0.491787	cysteine and glycine-rich protein 1
10262	SF3B4	H	0.491787	splicing factor 3b, subunit 4, 49kDa
23276	KLHL18	H	0.492731	kelch-like 18 (Drosophila)
825	CAPN3	H	0.493109	calpain 3, (p94)
55206	SBNO1	H	0.493298	strawberry notch homolog 1 (Drosophila)
23581	CASP14	H	0.494812	caspase 14, apoptosis-related cysteine peptidase
4285	MIPEP	L	0.495949	mitochondrial intermediate peptidase
6468	FBXW4	H	0.496329	F-box and WD repeat domain containing 4
81790	RNF170	L	0.496417	ring finger protein 170
9358	ITGBL1	H	0.496518	integrin, beta-like 1 (with EGF-like repeat domains)
84675	TRIM55	L	0.496898	tripartite motif containing 55
414062	CCL3L3	H	0.497468	chemokine (C-C motif) ligand 3-like 3
3018	HIST1H2BB	L	0.497468	histone cluster 1, H2bb
7873	MANF	H	0.497468	mesencephalic astrocyte-derived neurotrophic factor
79956	ERMP1	H	0.498038	endoplasmic reticulum metallopeptidase 1
6318	SERPINB4	H	0.499179	serpin peptidase inhibitor, clade B (ovalbumin), member 4
23142	DCUN1D4	L	0.499369	DCN1, defective in cullin neddylation 1, domain containing 4 (S. cerevisiae)
23277	KIAA0664	H	0.500512	KIAA0664
10121	ACTR1A	H	0.501274	ARP1 actin-related protein 1 homolog A, centractin alpha (yeast)
128869	PIGU	H	0.501465	phosphatidylinositol glycan anchor biosynthesis, class U
10311	DSCR3	L	0.502038	Down syndrome critical region gene 3
29066	ZC3H7A	L	0.502419	zinc finger CCCH-type containing 7A
23228	PLCL2	H	0.50261	phospholipase C-like 2
26088	GGA1	H	0.502801	golgi-associated, gamma adaptin ear containing, ARF binding protein 1
3190	HNRNPK	H	0.502801	heterogeneous nuclear ribonucleoprotein K
23161	SNX13	H	0.502801	sorting nexin 13
4222	MEOX1	L	0.503375	mesenchyme homeobox 1
100131187	TSTD1	H	0.503566	thiosulfate sulfurtransferase (rhodanese)-like domain containing 1
10438	C1D	H	0.504146	C1D nuclear receptor corepressor
728386	USP17L5	L	0.5053	ubiquitin specific peptidase 17-like 5
81631	MAP1LC3B	L	0.506822	microtubule-associated protein 1 light chain 3 beta
84749	USP30	H	0.507205	ubiquitin specific peptidase 30
80313	LRRC27	H	0.507205	leucine rich repeat containing 27
4641	MYO1C	L	0.507781	myosin IC
51665	ASB1	H	0.507973	ankyrin repeat and SOCS box containing 1
8893	EIF2B5	H	0.50855	eukaryotic translation initiation factor 2B, subunit 5 epsilon, 82kDa
3037	HAS2	H	0.508934	hyaluronan synthase 2
494470	RNF165	L	0.509126	ring finger protein 165
157506	RDH10	H	0.509511	retinol dehydrogenase 10 (all-trans)
[truncated: 934 more rows]

## Sheet: Tg+ISRIB
Entrez GeneID	Symbol	(H)igher or (L)ower reporter	P value	Gene information
8665	EIF3F	L	4.26941e-16	eukaryotic translation initiation factor 3, subunit F
55832	CAND1	H	1.67872e-13	cullin-associated and neddylation-dissociated 1
22985	ACIN1	L	1.77749e-12	apoptotic chromatin condensation inducer 1
8893	EIF2B5	H	2.35215e-11	eukaryotic translation initiation factor 2B, subunit 5 epsilon, 82kDa
1981	EIF4G1	L	3.38747e-11	eukaryotic translation initiation factor 4 gamma, 1
55737	VPS35	L	3.83335e-11	vacuolar protein sorting 35 homolog (S. cerevisiae)
8661	EIF3A	L	5.66798e-11	eukaryotic translation initiation factor 3, subunit A
201595	STT3B	H	6.04375e-11	STT3, subunit of the oligosaccharyltransferase complex, homolog B (S. cerevisiae)
10802	SEC24A	L	6.25318e-11	SEC24 family, member A (S. cerevisiae)
3183	HNRNPC	H	6.92497e-11	heterogeneous nuclear ribonucleoprotein C (C1/C2)
80204	FBXO11	L	3.44872e-10	F-box protein 11
29927	SEC61A1	L	2.0407e-09	Sec61 alpha 1 subunit (S. cerevisiae)
10054	UBA2	H	4.10872e-09	ubiquitin-like modifier activating enzyme 2
1973	EIF4A1	L	5.30851e-09	eukaryotic translation initiation factor 4A1
6396	SEC13	L	8.59842e-09	SEC13 homolog (S. cerevisiae)
8662	EIF3B	L	1.21115e-08	eukaryotic translation initiation factor 3, subunit B
10483	SEC23B	L	1.31993e-08	Sec23 homolog B (S. cerevisiae)
4738	NEDD8	H	2.65644e-08	neural precursor cell expressed, developmentally down-regulated 8
4904	YBX1	H	3.07837e-08	Y box binding protein 1
160	AP2A1	H	3.61391e-08	adaptor-related protein complex 2, alpha 1 subunit
3187	HNRNPH1	L	4.69214e-08	heterogeneous nuclear ribonucleoprotein H1 (H)
51699	VPS29	L	5.0707e-08	vacuolar protein sorting 29 homolog (S. cerevisiae)
400668	PRSS57	L	6.09988e-08	protease, serine, 57
551	AVP	L	7.19709e-08	arginine vasopressin
374882	TMEM205	L	1.00928e-07	transmembrane protein 205
51602	NOP58	L	1.19749e-07	NOP58 ribonucleoprotein homolog (yeast)
1173	AP2M1	H	1.97925e-07	adaptor-related protein complex 2, mu 1 subunit
8615	USO1	L	2.35462e-07	USO1 vesicle docking protein homolog (yeast)
1603	DAD1	H	3.03017e-07	defender against cell death 1
84179	MFSD7	L	4.83228e-07	major facilitator superfamily domain containing 7
10130	PDIA6	L	5.0484e-07	protein disulfide isomerase family A, member 6
6726	SRP9	H	5.23288e-07	signal recognition particle 9kDa
521	ATP5I	L	5.31509e-07	ATP synthase, H+ transporting, mitochondrial Fo complex, subunit E
2161	F12	L	5.49183e-07	coagulation factor XII (Hageman factor)
10212	DDX39A	L	1.10983e-06	DEAD (Asp-Glu-Ala-Asp) box polypeptide 39A
1975	EIF4B	L	1.17244e-06	eukaryotic translation initiation factor 4B
6923	TCEB2	L	1.26832e-06	transcription elongation factor B (SIII), polypeptide 2 (18kDa, elongin B)
8890	EIF2B4	H	1.3925e-06	eukaryotic translation initiation factor 2B, subunit 4 delta, 67kDa
25820	ARIH1	H	1.68188e-06	ariadne homolog, ubiquitin-conjugating enzyme E2 binding protein, 1 (Drosophila)
349667	RTN4RL2	L	1.82829e-06	reticulon 4 receptor-like 2
4825	NKX6-1	L	2.16831e-06	NK6 homeobox 1
8602	NOP14	L	2.18762e-06	NOP14 nucleolar protein homolog (yeast)
84232	MAF1	L	2.66849e-06	MAF1 homolog (S. cerevisiae)
23523	CABIN1	L	2.93903e-06	calcineurin binding protein 1
22984	PDCD11	L	4.70254e-06	programmed cell death 11
6129	RPL7	L	5.08727e-06	ribosomal protein L7
7403	KDM6A	H	5.46304e-06	lysine (K)-specific demethylase 6A
142678	MIB2	L	6.32258e-06	mindbomb homolog 2 (Drosophila)
2197	FAU	L	6.54069e-06	Finkel-Biskis-Reilly murine sarcoma virus (FBR-MuSV) ubiquitously expressed
4802	NFYC	L	7.90305e-06	nuclear transcription factor Y, gamma
9736	USP34	H	8.36323e-06	ubiquitin specific peptidase 34
9632	SEC24C	H	1.07691e-05	SEC24 family, member C (S. cerevisiae)
6613	SUMO2	H	1.13175e-05	SMT3 suppressor of mif two 3 homolog 2 (S. cerevisiae)
10162	LPCAT3	H	1.21069e-05	lysophosphatidylcholine acyltransferase 3
10713	USP39	H	1.24375e-05	ubiquitin specific peptidase 39
199720	GGN	L	1.25469e-05	gametogenetin
11311	VPS45	H	1.31633e-05	vacuolar protein sorting 45 homolog (S. cerevisiae)
1655	DDX5	H	1.43659e-05	DEAD (Asp-Glu-Ala-Asp) box polypeptide 5
10477	UBE2E3	H	1.61477e-05	ubiquitin-conjugating enzyme E2E 3 (UBC4/5 homolog, yeast)
51182	HSPA14	L	2.08929e-05	heat shock 70kDa protein 14
7542	ZFPL1	L	2.19773e-05	zinc finger protein-like 1
3336	HSPE1	H	2.22431e-05	heat shock 10kDa protein 1 (chaperonin 10)
10897	YIF1A	L	2.25721e-05	Yip1 interacting factor homolog A (S. cerevisiae)
113026	PLCD3	L	2.66163e-05	phospholipase C, delta 3
10277	UBE4B	L	2.71498e-05	ubiquitination factor E4B (UFD2 homolog, yeast)
54863	C9orf167	L	2.72938e-05	chromosome 9 open reading frame 167
55299	BRIX1	L	2.82848e-05	BRX1, biogenesis of ribosomes, homolog (S. cerevisiae)
84219	WDR24	L	3.08939e-05	WD repeat domain 24
28987	NOB1	L	3.2606e-05	NIN1/RPN12 binding protein 1 homolog (S. cerevisiae)
6427	SRSF2	L	3.75886e-05	serine/arginine-rich splicing factor 2
8510	MMP23B	L	3.97418e-05	matrix metallopeptidase 23B
8763	CD164	H	4.55285e-05	CD164 molecule, sialomucin
116138	KLHDC3	L	4.68365e-05	kelch domain containing 3
8330	HIST1H2AK	L	4.93505e-05	histone cluster 1, H2ak
8314	BAP1	L	5.98661e-05	BRCA1 associated protein-1 (ubiquitin carboxy-terminal hydrolase)
10607	TBL3	L	6.37039e-05	transducin (beta)-like 3
165	AEBP1	L	6.38654e-05	AE binding protein 1
163	AP2B1	H	6.55845e-05	adaptor-related protein complex 2, beta 1 subunit
27344	PCSK1N	L	6.96161e-05	proprotein convertase subtilisin/kexin type 1 inhibitor
51747	LUC7L3	H	6.96799e-05	LUC7-like 3 (S. cerevisiae)
26973	CHORDC1	L	7.23612e-05	cysteine and histidine-rich domain (CHORD) containing 1
10755	GIPC1	L	0.000103824	GIPC PDZ domain containing family, member 1
64326	RFWD2	L	0.000108261	ring finger and WD repeat domain 2
8189	SYMPK	L	0.00011014	symplekin
23277	KIAA0664	L	0.00011205	KIAA0664
23019	CNOT1	H	0.000115538	CCR4-NOT transcription complex, subunit 1
25873	RPL36	L	0.000124787	ribosomal protein L36
353143	LCE3B	L	0.00012959	late cornified envelope 3B
84196	USP48	L	0.000141599	ubiquitin specific peptidase 48
8570	KHSRP	H	0.000157657	KH-type splicing regulatory protein
4597	MVD	L	0.000167416	mevalonate (diphospho) decarboxylase
25879	DCAF13	L	0.000173333	DDB1 and CUL4 associated factor 13
140606	SELM	L	0.000179661	selenoprotein M
386676	KRTAP10-9	L	0.000179661	keratin associated protein 10-9
57462	KIAA1161	L	0.000180737	KIAA1161
9355	LHX2	L	0.000182906	LIM homeobox 2
83985	SPNS1	L	0.000188444	spinster homolog 1 (Drosophila)
147968	CAPN12	L	0.00019092	calpain 12
22	ABCB7	L	0.000196678	ATP-binding cassette, sub-family B (MDR/TAP), member 7
140683	C20orf70	L	0.000212673	chromosome 20 open reading frame 70
92856	IMP4	L	0.000213176	IMP4, U3 small nucleolar ribonucleoprotein, homolog (yeast)
3013	HIST1H2AD	L	0.000217376	histone cluster 1, H2ad
8335	HIST1H2AB	L	0.000219821	histone cluster 1, H2ab
57418	WDR18	L	0.000240942	WD repeat domain 18
1412	CRYBA2	L	0.000245216	crystallin, beta A2
79798	ARMC5	L	0.000245791	armadillo repeat containing 5
6239	RREB1	H	0.000255467	ras responsive element binding protein 1
30846	EHD2	L	0.000259375	EH-domain containing 2
9643	MORF4L2	L	0.000265189	mortality factor 4 like 2
10985	GCN1L1	L	0.000291034	GCN1 general control of amino-acid synthesis 1-like 1 (yeast)
253982	ASPHD1	L	0.000296136	aspartate beta-hydroxylase domain containing 1
55035	NOL8	L	0.000296479	nucleolar protein 8
1650	DDOST	H	0.000304824	dolichyl-diphosphooligosaccharide--protein glycosyltransferase
7469	WHSC2	L	0.000317025	Wolf-Hirschhorn syndrome candidate 2
3190	HNRNPK	H	0.000335029	heterogeneous nuclear ribonucleoprotein K
5822	PWP2	L	0.0003358	PWP2 periodic tryptophan protein homolog (yeast)
6832	SUPV3L1	L	0.000338898	suppressor of var1, 3-like 1 (S. cerevisiae)
402	ARL2	L	0.000365503	ADP-ribosylation factor-like 2
335	APOA1	L	0.000391372	apolipoprotein A-I
22872	SEC31A	L	0.000405859	SEC31 homolog A (S. cerevisiae)
23149	FCHO1	L	0.00044984	FCH domain only 1
10695	CNPY3	L	0.000453912	canopy 3 homolog (zebrafish)
493829	TRIM72	L	0.000494902	tripartite motif containing 72
2865	FFAR3	L	0.000514065	free fatty acid receptor 3
2286	FKBP2	L	0.000539323	FK506 binding protein 2, 13kDa
26986	PABPC1	L	0.000544751	poly(A) binding protein, cytoplasmic 1
23113	CUL9	L	0.000552068	cullin 9
136371	ASB10	L	0.000562589	ankyrin repeat and SOCS box containing 10
10594	PRPF8	H	0.000617375	PRP8 pre-mRNA processing factor 8 homolog (S. cerevisiae)
10139	ARFRP1	L	0.000712076	ADP-ribosylation factor related protein 1
79176	FBXL15	L	0.00072327	F-box and leucine-rich repeat protein 15
55206	SBNO1	H	0.00073171	strawberry notch homolog 1 (Drosophila)
79872	CBLL1	L	0.000743761	Cas-Br-M (murine) ecotropic retroviral transforming sequence-like 1
29925	GMPPB	L	0.000747819	GDP-mannose pyrophosphorylase B
2079	ERH	H	0.000782724	enhancer of rudimentary homolog (Drosophila)
147700	KLC3	L	0.000788686	kinesin light chain 3
55658	RNF126	L	0.000828034	ring finger protein 126
4647	MYO7A	L	0.000837022	myosin VIIA
7791	ZYX	L	0.000892877	zyxin
26232	FBXO2	L	0.00094608	F-box protein 2
10287	RGS19	L	0.000957272	regulator of G-protein signaling 19
10525	HYOU1	H	0.000960346	hypoxia up-regulated 1
84958	SYTL1	L	0.0009624	synaptotagmin-like 1
84447	SYVN1	H	0.000964458	synovial apoptosis inhibitor 1, synoviolin
26233	FBXL6	L	0.000993703	F-box and leucine-rich repeat protein 6
10312	TCIRG1	L	0.00101509	T-cell, immune regulator 1, ATPase, H+ transporting, lysosomal V0 subunit A3
10574	CCT7	H	0.00102439	chaperonin containing TCP1, subunit 7 (eta)
30834	ZNRD1	L	0.00103251	zinc ribbon domain containing 1
8193	DPF1	L	0.00114416	D4, zinc and double PHD fingers family 1
27230	SERP1	H	0.00115507	stress-associated endoplasmic reticulum protein 1
7064	THOP1	L	0.00123027	thimet oligopeptidase 1
51070	NOSIP	L	0.00127087	nitric oxide synthase interacting protein
10492	SYNCRIP	L	0.00128289	synaptotagmin binding, cytoplasmic RNA interacting protein
10291	SF3A1	H	0.00128961	splicing factor 3a, subunit 1, 120kDa
23526	HMHA1	L	0.00131819	histocompatibility (minor) HA-1
10131	TRAP1	L	0.00133758	TNF receptor-associated protein 1
10612	TRIM3	L	0.00133897	tripartite motif containing 3
2253	FGF8	L	0.00137284	fibroblast growth factor 8 (androgen-induced)
26994	RNF11	H	0.00139151	ring finger protein 11
8340	HIST1H2BL	L	0.00147162	histone cluster 1, H2bl
6728	SRP19	L	0.00150857	signal recognition particle 19kDa
84261	FBXW9	L	0.00151794	F-box and WD repeat domain containing 9
168620	BHLHA15	L	0.00158667	basic helix-loop-helix family, member a15
527	ATP6V0C	H	0.00163463	ATPase, H+ transporting, lysosomal 16kDa, V0 subunit c
22826	DNAJC8	H	0.00165148	DnaJ (Hsp40) homolog, subfamily C, member 8
393	ARHGAP4	L	0.00165148	Rho GTPase activating protein 4
29979	UBQLN1	H	0.00172751	ubiquilin 1
4650	MYO9B	H	0.0017399	myosin IXB
11231	SEC63	L	0.00175953	SEC63 homolog (S. cerevisiae)
9789	SPCS2	H	0.00179758	signal peptidase complex subunit 2 homolog (S. cerevisiae)
10616	RBCK1	L	0.00183452	RanBP-type and C3HC4-type zinc finger containing 1
23203	PMPCA	L	0.00184199	peptidase (mitochondrial processing) alpha
29956	LASS2	H	0.00187786	LAG1 homolog, ceramide synthase 2
10299	MARCH6	H	0.00191244	membrane-associated ring finger (C3HC4) 6
23192	ATG4B	L	0.00198936	ATG4 autophagy related 4 homolog B (S. cerevisiae)
2665	GDI2	H	0.00199942	GDP dissociation inhibitor 2
11151	CORO1A	L	0.00200751	coronin, actin binding protein, 1A
55072	RNF31	L	0.00210267	ring finger protein 31
10952	SEC61B	H	0.00217783	Sec61 beta subunit
10263	CDK2AP2	L	0.00220195	cyclin-dependent kinase 2 associated protein 2
57332	CBX8	L	0.0022758	chromobox homolog 8
468	ATF4	H	0.00231473	activating transcription factor 4 (tax-responsive enhancer element B67)
8916	HERC3	H	0.00241592	hect domain and RLD 3
134266	GRPEL2	L	0.00242795	GrpE-like 2, mitochondrial (E. coli)
26086	GPSM1	L	0.00244973	G-protein signaling modulator 1
7862	BRPF1	L	0.00253616	bromodomain and PHD finger containing, 1
9958	USP15	H	0.00269879	ubiquitin specific peptidase 15
2515	ADAM2	H	0.0027362	ADAM metallopeptidase domain 2
4007	PRICKLE3	L	0.00274427	prickle homolog 3 (Drosophila)
43847	KLK14	L	0.00282073	kallikrein-related peptidase 14
9114	ATP6V0D1	H	0.00282073	ATPase, H+ transporting, lysosomal 38kDa, V0 subunit d1
55717	WDR11	L	0.00303223	WD repeat domain 11
57003	CCDC47	L	0.00305891	coiled-coil domain containing 47
55643	BTBD2	L	0.00306786	BTB (POZ) domain containing 2
388323	GLTPD2	L	0.00310991	glycolipid transfer protein domain containing 2
1417	CRYBB3	L	0.00318631	crystallin, beta B3
4898	NRD1	H	0.00326126	nardilysin (N-arginine dibasic convertase)
3996	LLGL1	L	0.00326441	lethal giant larvae homolog 1 (Drosophila)
23562	CLDN14	L	0.00328342	claudin 14
9898	UBAP2L	H	0.0034127	ubiquitin associated protein 2-like
29116	MYLIP	H	0.00341929	myosin regulatory light chain interacting protein
84954	MPND	L	0.00350594	MPN domain containing
9031	BAZ1B	L	0.0036109	bromodomain adjacent to zinc finger domain, 1B
23060	ZNF609	L	0.00362227	zinc finger protein 609
23646	PLD3	L	0.00367822	phospholipase D family, member 3
55850	USE1	L	0.0037207	unconventional SNARE in the ER 1 homolog (S. cerevisiae)
5184	PEPD	L	0.00376362	peptidase D
2896	GRN	L	0.00379611	granulin
10730	YME1L1	H	0.00379973	YME1-like 1 (S. cerevisiae)
3175	ONECUT1	L	0.00388399	one cut homeobox 1
515	ATP5F1	L	0.00390253	ATP synthase, H+ transporting, mitochondrial Fo complex, subunit B1
1203	CLN5	H	0.00404223	ceroid-lipofuscinosis, neuronal 5
1747	DLX3	L	0.00404223	distal-less homeobox 3
115817	DHRS1	L	0.0040769	dehydrogenase/reductase (SDR family) member 1
150726	FBXO41	L	0.00408464	F-box protein 41
5903	RANBP2	H	0.00409239	RAN binding protein 2
3550	IK	H	0.00410015	IK cytokine, down-regulator of HLA II
3982	LIM2	L	0.00413135	lens intrinsic membrane protein 2, 19kDa
6729	SRP54	L	0.00414311	signal recognition particle 54kDa
283237	TTC9C	L	0.00414311	tetratricopeptide repeat domain 9C
2319	FLOT2	L	0.0041944	flotillin 2
3192	HNRNPU	L	0.00422624	heterogeneous nuclear ribonucleoprotein U (scaffold attachment factor A)
140825	NEURL2	L	0.00435584	neuralized homolog 2 (Drosophila)
23025	UNC13A	L	0.00443866	unc-13 homolog A (C. elegans)
25987	TSKU	L	0.00454845	tsukushi small leucine rich proteoglycan homolog (Xenopus laevis)
84861	KLHL22	L	0.00460947	kelch-like 22 (Drosophila)
51377	UCHL5	H	0.00462156	ubiquitin carboxyl-terminal hydrolase L5
150274	HSCB	L	0.00468695	HscB iron-sulfur cluster co-chaperone homolog (E. coli)
84617	TUBB6	L	0.00470453	tubulin, beta 6
832	CAPZB	L	0.00470894	capping protein (actin filament) muscle Z-line, beta
90864	SPSB3	L	0.00477099	splA/ryanodine receptor domain and SOCS box containing 3
537	ATP6AP1	H	0.00477545	ATPase, H+ transporting, lysosomal accessory protein 1
4037	LRP3	L	0.00483059	low density lipoprotein receptor-related protein 3
168002	DACT2	L	0.00488363	dapper, antagonist of beta-catenin, homolog 2 (Xenopus laevis)
51032	CELA2B	L	0.0050783	chymotrypsin-like elastase family, member 2B
55207	ARL8B	H	0.00510194	ADP-ribosylation factor-like 8B
11322	TMC6	L	0.0051352	transmembrane channel-like 6
3549	IHH	L	0.00531919	Indian hedgehog
173	AFM	L	0.00535372	afamin
5025	P2RX4	L	0.00552462	purinergic receptor P2X, ligand-gated ion channel, 4
8468	FKBP6	H	0.0055601	FK506 binding protein 6, 36kDa
79411	GLB1L	L	0.00560635	galactosidase, beta 1-like
9546	APBA3	L	0.00567377	amyloid beta (A4) precursor protein-binding, family A, member 3
113791	PIK3IP1	L	0.00571562	phosphoinositide-3-kinase interacting protein 1
55898	UNC45A	L	0.00573608	unc-45 homolog A (C. elegans)
8329	HIST1H2AI	L	0.00581614	histone cluster 1, H2ai
20	ABCA2	L	0.00587505	ATP-binding cassette, sub-family A (ABC1), member 2
201176	ARHGAP27	L	0.00591048	Rho GTPase activating protein 27
200931	OSTalpha	L	0.00596717	organic solute transporter alpha
309	ANXA6	L	0.00596717	annexin A6
7494	XBP1	L	0.00597263	X-box binding protein 1
201255	LRRC45	L	0.00603849	leucine rich repeat containing 45
2801	GOLGA2	L	0.00626277	golgin A2
11132	CAPN10	L	0.0065834	calpain 10
55295	KLHL26	L	0.00665528	kelch-like 26 (Drosophila)
65264	UBE2Z	H	0.00670966	ubiquitin-conjugating enzyme E2Z
2517	FUCA1	H	0.00696247	fucosidase, alpha-L- 1, tissue
6176	RPLP1	L	0.00703173	ribosomal protein, large, P1
116150	NUS1	H	0.0070825	nuclear undecaprenyl pyrophosphate synthase 1 homolog (S. cerevisiae)
25823	TPSG1	L	0.00715926	tryptase gamma 1
10575	CCT4	H	0.00715926	chaperonin containing TCP1, subunit 4 (delta)
51257	MARCH2	L	0.00726277	membrane-associated ring finger (C3HC4) 2
7917	BAG6	H	0.00728233	BCL2-associated athanogene 6
9870	KIAA0317	H	0.00732815	KIAA0317
116988	AGAP3	L	0.00739405	ArfGAP with GTPase domain, ankyrin repeat and PH domain 3
84669	USP32	L	0.00761532	ubiquitin specific peptidase 32
1415	CRYBB2	L	0.00773849	crystallin, beta B2
123099	DEGS2	L	0.00780769	degenerative spermatocyte homolog 2, lipid desaturase (Drosophila)
23403	FBXO46	L	0.00791253	F-box protein 46
5861	RAB1A	L	0.0079407	RAB1A, member RAS oncogene family
57192	MCOLN1	L	0.00804	mucolipin 1
566	AZU1	L	0.00825654	azurocidin 1
8338	HIST2H2AC	L	0.00830781	histone cluster 2, H2ac
132612	ADAD1	H	0.00832252	adenosine deaminase domain containing 1 (testis-specific)
10933	MORF4L1	H	0.00834461	mortality factor 4 like 1
10908	PNPLA6	L	0.00864427	patatin-like phospholipase domain containing 6
488	ATP2A2	L	0.0087668	ATPase, Ca++ transporting, cardiac muscle, slow twitch 2
79174	CRELD2	L	0.00881315	cysteine-rich with EGF-like domains 2
59286	UBL5	L	0.00892998	ubiquitin-like 5
7126	TNFAIP1	L	0.00895351	tumor necrosis factor, alpha-induced protein 1 (endothelial)
23295	MGRN1	L	0.00899285	mahogunin, ring finger 1
164656	TMPRSS6	L	0.00906406	transmembrane protease, serine 6
2736	GLI2	L	0.00923216	GLI family zinc finger 2
10943	MSL3	L	0.00942768	male-specific lethal 3 homolog (Drosophila)
51255	RNF181	L	0.00950195	ring finger protein 181
84108	PCGF6	H	0.00956841	polycomb group ring finger 6
51720	UIMC1	L	0.00957674	ubiquitin interaction motif containing 1
329	BIRC2	H	0.00958508	baculoviral IAP repeat containing 2
94086	HSPB9	L	0.00963527	heat shock protein, alpha-crystallin-related, B9
56928	SPPL2B	L	0.00977875	signal peptide peptidase-like 2B
617	BCS1L	L	0.00992413	BCS1-like (S. cerevisiae)
8710	SERPINB7	H	0.0100192	serpin peptidase inhibitor, clade B (ovalbumin), member 7
10179	RBM7	H	0.0101151	RNA binding motif protein 7
57805	KIAA1967	L	0.0102118	KIAA1967
10946	SF3A3	H	0.0102207	splicing factor 3a, subunit 3, 60kDa
79734	KCTD17	L	0.0102472	potassium channel tetramerisation domain containing 17
10399	GNB2L1	H	0.0103629	guanine nucleotide binding protein (G protein), beta polypeptide 2-like 1
9986	RCE1	L	0.0103988	RCE1 homolog, prenyl protein peptidase (S. cerevisiae)
6556	SLC11A1	L	0.0105796	solute carrier family 11 (proton-coupled divalent metal ion transporters), member 1
114088	TRIM9	L	0.0106711	tripartite motif containing 9
90226	UCN2	L	0.0107263	urocortin 2
10920	COPS8	H	0.0107263	COP9 constitutive photomorphogenic homolog subunit 8 (Arabidopsis)
9322	TRIP10	L	0.0110252	thyroid hormone receptor interactor 10
8357	HIST1H3H	L	0.011063	histone cluster 1, H3h
84678	KDM2B	H	0.0111391	lysine (K)-specific demethylase 2B
4038	LRP4	L	0.0111773	low density lipoprotein receptor-related protein 4
26056	RAB11FIP5	L	0.0114188	RAB11 family interacting protein 5 (class I)
146894	CD300LG	L	0.0115659	CD300 molecule-like family member g
8352	HIST1H3C	L	0.0117948	histone cluster 1, H3c
1174	AP1S1	L	0.0119462	adaptor-related protein complex 1, sigma 1 subunit
79716	NPEPL1	L	0.0119563	aminopeptidase-like 1
8968	HIST1H3F	L	0.0119868	histone cluster 1, H3f
3921	RPSA	L	0.0120788	ribosomal protein SA
360200	TMPRSS9	L	0.0122541	transmembrane protease, serine 9
1071	CETP	L	0.0122853	cholesteryl ester transfer protein, plasma
402317	OR2A42	L	0.0123793	olfactory receptor, family 2, subfamily A, member 42
54815	GATAD2A	L	0.0123793	GATA zinc finger domain containing 2A
27440	CECR5	L	0.0124003	cat eye syndrome chromosome region, candidate 5
8347	HIST1H2BC	L	0.0124844	histone cluster 1, H2bc
79158	GNPTAB	L	0.0125691	N-acetylglucosamine-1-phosphate transferase, alpha and beta subunits
114822	RHPN1	L	0.0125691	rhophilin, Rho GTPase binding protein 1
7782	SLC30A4	H	0.0126971	solute carrier family 30 (zinc transporter), member 4
23029	RBM34	L	0.0127508	RNA binding motif protein 34
221955	DAGLB	L	0.0128587	diacylglycerol lipase, beta
113419	TEX261	H	0.0128913	testis expressed 261
8557	TCAP	L	0.0128952	titin-cap (telethonin)
10484	SEC23A	L	0.012913	Sec23 homolog A (S. cerevisiae)
7844	RNF103	H	0.0129457	ring finger protein 103
10947	AP3M2	H	0.0129893	adaptor-related protein complex 3, mu 2 subunit
5930	RBBP6	L	0.0130441	retinoblastoma binding protein 6
10197	PSME3	H	0.0130441	proteasome (prosome, macropain) activator subunit 3 (PA28 gamma; Ki)
339105	PRSS53	L	0.0131985	protease, serine, 53
64410	KLHL25	L	0.0132489	kelch-like 25 (Drosophila)
84061	MAGT1	H	0.0133769	magnesium transporter 1
57644	MYH7B	L	0.0134219	myosin, heavy chain 7B, cardiac muscle, beta
84875	PARP10	L	0.0134783	poly (ADP-ribose) polymerase family, member 10
26020	LRP10	L	0.0136715	low density lipoprotein receptor-related protein 10
2700	GJA3	H	0.0138209	gap junction protein, alpha 3, 46kDa
11236	RNF139	H	0.0138324	ring finger protein 139
126961	HIST2H3C	L	0.0140894	histone cluster 2, H3c
9537	TP53I11	L	0.0142066	tumor protein p53 inducible protein 11
29886	SNX8	L	0.0146626	sorting nexin 8
90580	C19orf52	L	0.0146991	chromosome 19 open reading frame 52
114879	OSBPL5	L	0.0147602	oxysterol binding protein-like 5
150379	PNPLA5	L	0.0148953	patatin-like phospholipase domain containing 5
259173	ALS2CL	L	0.0151439	ALS2 C-terminal like
79441	HAUS3	H	0.0151814	HAUS augmin-like complex, subunit 3
10899	JTB	L	0.0152317	jumping translocation breakpoint
56931	DUS3L	L	0.0152695	dihydrouridine synthase 3-like (S. cerevisiae)
1315	COPB1	L	0.0154087	coatomer protein complex, subunit beta 1
9559	VPS26A	L	0.0159376	vacuolar protein sorting 26 homolog A (S. pombe)
9636	ISG15	L	0.0160164	ISG15 ubiquitin-like modifier
283234	CCDC88B	L	0.0161087	coiled-coil domain containing 88B
64788	LMF1	L	0.0161351	lipase maturation factor 1
3007	HIST1H1D	L	0.0162813	histone cluster 1, H1d
91319	DERL3	L	0.0162946	Der1-like domain family, member 3
2846	LPAR4	H	0.0163213	lysophosphatidic acid receptor 4
5704	PSMC4	L	0.0163615	proteasome (prosome, macropain) 26S subunit, ATPase, 4
23304	UBR2	H	0.0164825	ubiquitin protein ligase E3 component n-recognin 2
10204	NUTF2	L	0.0166178	nuclear transport factor 2
633	BGN	L	0.0167815	biglycan
645142	PPIAL4D	L	0.016787	peptidylprolyl isomerase A (cyclophilin A)-like 4D
55192	DNAJC17	L	0.0168914	DnaJ (Hsp40) homolog, subfamily C, member 17
10694	CCT8	H	0.016919	chaperonin containing TCP1, subunit 8 (theta)
30	ACAA1	L	0.017002	acetyl-CoA acyltransferase 1
64211	LHX5	L	0.017267	LIM homeobox 5
50846	DHH	L	0.0172811	desert hedgehog
150737	TTC30B	H	0.0173798	tetratricopeptide repeat domain 30B
9684	LRRC14	L	0.0175643	leucine rich repeat containing 14
4884	NPTX1	L	0.0176643	neuronal pentraxin I
871	SERPINH1	L	0.0176787	serpin peptidase inhibitor, clade H (heat shock protein 47), member 1, (collagen binding protein 1)
10406	WFDC2	L	0.017693	WAP four-disulfide core domain 2
11093	ADAMTS13	L	0.0177649	ADAM metallopeptidase with thrombospondin type 1 motif, 13
29952	DPP7	L	0.018231	dipeptidyl-peptidase 7
8345	HIST1H2BH	L	0.0188894	histone cluster 1, H2bh
10948	STARD3	L	0.0190725	StAR-related lipid transfer (START) domain containing 3
10113	PREB	L	0.0192263	prolactin regulatory element binding
79004	CUEDC2	L	0.0194123	CUE domain containing 2
29988	SLC2A8	L	0.0194941	solute carrier family 2 (facilitated glucose transporter), member 8
441509	GLRA4	L	0.0195841	glycine receptor, alpha 4
30061	SLC40A1	L	0.0197415	solute carrier family 40 (iron-regulated transporter), member 1
257106	ARHGAP30	L	0.019789	Rho GTPase activating protein 30
55756	INTS9	H	0.0198365	integrator complex subunit 9
164592	CCDC116	L	0.0199	coiled-coil domain containing 116
26168	SENP3	H	0.0200276	SUMO1/sentrin/SMT3 specific peptidase 3
5238	PGM3	H	0.0202365	phosphoglucomutase 3
649	BMP1	L	0.0203173	bone morphogenetic protein 1
201294	UNC13D	L	0.0205943	unc-13 homolog D (C. elegans)
59343	SENP2	H	0.0206271	SUMO1/sentrin/SMT3 specific peptidase 2
4000	LMNA	L	0.0207903	lamin A/C
23221	RHOBTB2	L	0.0208911	Rho-related BTB domain containing 2
50674	NEUROG3	L	0.0210576	neurogenin 3
347735	SERINC2	L	0.021091	serine incorporator 2
54542	RC3H2	L	0.0211581	ring finger and CCCH-type domains 2
7705	ZNF146	H	0.0211748	zinc finger protein 146
10282	BET1	H	0.0212927	blocked early in transport 1 homolog (S. cerevisiae)
56927	GPR108	L	0.0215982	G protein-coupled receptor 108
80128	TRIM46	L	0.0217189	tripartite motif containing 46
373509	USP50	H	0.0217868	ubiquitin specific peptidase 50
79786	KLHL36	L	0.0219942	kelch-like 36 (Drosophila)
10004	NAALADL1	L	0.0221334	N-acetylated alpha-linked acidic dipeptidase-like 1
27342	RABGEF1	H	0.0222208	RAB guanine nucleotide exchange factor (GEF) 1
150209	AIFM3	L	0.0223261	apoptosis-inducing factor, mitochondrion-associated, 3
126129	CPT1C	L	0.0223758	carnitine palmitoyltransferase 1C
286256	LCN12	L	0.0226801	lipocalin 12
10567	RABAC1	L	0.0231477	Rab acceptor 1 (prenylated)
56061	UBFD1	H	0.0231658	ubiquitin family domain containing 1
1585	CYP11B2	L	0.0233663	cytochrome P450, family 11, subfamily B, polypeptide 2
81605	URM1	L	0.0234029	ubiquitin related modifier 1
10102	TSFM	L	0.0234212	Ts translation elongation factor, mitochondrial
80313	LRRC27	L	0.0234579	leucine rich repeat containing 27
55062	WIPI1	L	0.0238833	WD repeat domain, phosphoinositide interacting 1
124912	SPACA3	L	0.0239767	sperm acrosome associated 3
388581	FAM132A	L	0.0244708	family with sequence similarity 132, member A
79956	ERMP1	H	0.0244864	endoplasmic reticulum metallopeptidase 1
2248	FGF3	L	0.0245245	fibroblast growth factor 3
284366	KLK9	L	0.0247351	kallikrein-related peptidase 9
101	ADAM8	L	0.024812	ADAM metallopeptidase domain 8
84085	FBXO30	H	0.0250248	F-box protein 30
285533	RNF175	L	0.0251025	ring finger protein 175
23196	FAM120A	H	0.025122	family with sequence similarity 120A
23376	KIAA0776	H	0.0253567	KIAA0776
220323	OAF	L	0.025455	OAF homolog (Drosophila)
122786	FRMD6	H	0.025455	FERM domain containing 6
399664	MEX3D	L	0.0254747	mex-3 homolog D (C. elegans)
54442	KCTD5	H	0.0259717	potassium channel tetramerisation domain containing 5
10279	PRSS16	H	0.0260118	protease, serine, 16 (thymus)
10488	CREB3	L	0.0260519	cAMP responsive element binding protein 3
91107	TRIM47	L	0.0264974	tripartite motif containing 47
83737	ITCH	H	0.026661	itchy E3 ubiquitin protein ligase homolog (mouse)
1891	ECH1	L	0.0267842	enoyl CoA hydratase 1, peroxisomal
10523	CHERP	L	0.026908	calcium homeostasis endoplasmic reticulum protein
64215	DNAJC1	H	0.027157	DnaJ (Hsp40) homolog, subfamily C, member 1
10877	CFHR4	L	0.0271775	complement factor H-related 4
10537	UBD	H	0.027408	ubiquitin D
152518	NFXL1	L	0.027429	nuclear transcription factor, X-box binding-like 1
5977	DPF2	H	0.027661	D4, zinc and double PHD fingers family 2
2137	EXTL3	H	0.027661	exostoses (multiple)-like 3
4504	MT3	L	0.0278733	metallothionein 3
2771	GNAI2	L	0.0280442	guanine nucleotide binding protein (G protein), alpha inhibiting activity polypeptide 2
8078	USP5	H	0.028173	ubiquitin specific peptidase 5 (isopeptidase T)
128240	APOA1BP	L	0.0283239	apolipoprotein A-I binding protein
2553	GABPB1	L	0.0283455	GA binding protein transcription factor, beta subunit 1
126326	GIPC3	L	0.0284321	GIPC PDZ domain containing family, member 3
161835	FSIP1	L	0.0284321	fibrous sheath interacting protein 1
8907	AP1M1	L	0.0287369	adaptor-related protein complex 1, mu 1 subunit
7979	SHFM1	L	0.0287369	split hand/foot malformation (ectrodactyly) type 1
11076	TPPP	L	0.0290445	tubulin polymerization promoting protein
24139	EML2	L	0.0291298	echinoderm microtubule associated protein like 2
140432	RNF113B	L	0.0291772	ring finger protein 113B
129080	EMID1	L	0.0292438	EMI domain containing 1
23111	SPG20	H	0.0296683	spastic paraplegia 20 (Troyer syndrome)
26118	WSB1	H	0.0298486	WD repeat and SOCS box containing 1
3449	IFNA16	H	0.0299618	interferon, alpha 16
9616	RNF7	H	0.0301665	ring finger protein 7
10333	TLR6	H	0.0304412	toll-like receptor 6
342898	SYCN	L	0.0305563	syncollin
25864	ABHD14A	L	0.0307645	abhydrolase domain containing 14A
4012	LNPEP	L	0.0307645	leucyl/cystinyl aminopeptidase
23248	RPRD2	L	0.0307877	regulation of nuclear pre-mRNA domain containing 2
12	SERPINA3	L	0.0309738	serpin peptidase inhibitor, clade A (alpha-1 antiproteinase, antitrypsin), member 3
55275	VPS53	H	0.031349	vacuolar protein sorting 53 homolog (S. cerevisiae)
166379	BBS12	H	0.0317281	Bardet-Biedl syndrome 12
124975	GGT6	L	0.0318235	gamma-glutamyltransferase 6
152559	PAQR3	H	0.0319431	progestin and adipoQ receptor family member III
147138	TMC8	H	0.0320871	transmembrane channel-like 8
5015	OTX2	H	0.0321112	orthodenticle homeobox 2
51127	TRIM17	L	0.032124	tripartite motif containing 17
286436	H2BFM	H	0.0323526	H2B histone family, member M
8775	NAPA	L	0.0323706	N-ethylmaleimide-sensitive factor attachment protein, alpha
1397	CRIP2	L	0.0324981	cysteine-rich protein 2
1266	CNN3	H	0.0325711	calponin 3, acidic
8878	SQSTM1	L	0.0326199	sequestosome 1
5699	PSMB10	L	0.0326931	proteasome (prosome, macropain) subunit, beta type, 10
79819	WDR78	H	0.0327665	WD repeat domain 78
115290	FBXO17	L	0.033583	F-box protein 17
7036	TFR2	L	0.0341116	transferrin receptor 2
3991	LIPE	L	0.0346987	lipase, hormone-sensitive
9777	TM9SF4	L	0.0347759	transmembrane 9 superfamily protein member 4
8943	AP3D1	L	0.0348533	adaptor-related protein complex 3, delta 1 subunit
1059	CENPB	L	0.0348533	centromere protein B, 80kDa
115992	RNF166	L	0.0349825	ring finger protein 166
147323	STARD6	H	0.0350343	StAR-related lipid transfer (START) domain containing 6
57156	TMEM63C	L	0.0351902	transmembrane protein 63C
8848	TSC22D1	H	0.0352716	TSC22 domain family, member 1
54878	DPP8	H	0.0353727	dipeptidyl-peptidase 8
127435	PODN	L	0.0355036	podocan
260434	PYDC1	L	0.0360845	PYD (pyrin domain) containing 1
375775	PNPLA7	L	0.036191	patatin-like phospholipase domain containing 7
516	ATP5G1	L	0.0363244	ATP synthase, H+ transporting, mitochondrial Fo complex, subunit C1 (subunit 9)
50613	UBQLN3	L	0.0363512	ubiquilin 3
93210	PGAP3	L	0.0364047	post-GPI attachment to proteins 3
7993	UBXN8	H	0.0364871	UBX domain protein 8
283471	TMPRSS12	H	0.036512	transmembrane (C-terminal) protease, serine 12
10067	SCAMP3	L	0.0369981	secretory carrier membrane protein 3
54834	GDAP2	H	0.0371886	ganglioside induced differentiation associated protein 2
55611	OTUB1	L	0.03738	OTU domain, ubiquitin aldehyde binding 1
7136	TNNI2	L	0.0374897	troponin I type 2 (skeletal, fast)
7732	RNF112	L	0.0376548	ring finger protein 112
3601	IL15RA	L	0.0377652	interleukin 15 receptor, alpha
3280	HES1	L	0.0381538	hairy and enhancer of split 1, (Drosophila)
255374	MBLAC1	L	0.0386303	metallo-beta-lactamase domain containing 1
4641	MYO1C	L	0.0386585	myosin IC
91544	UBXN11	L	0.0386867	UBX domain protein 11
27132	CPNE7	L	0.0387431	copine VII
51061	TXNDC11	L	0.0387996	thioredoxin domain containing 11
478	ATP1A3	L	0.0391118	ATPase, Na+/K+ transporting, alpha 3 polypeptide
3112	HLA-DOB	H	0.0392258	major histocompatibility complex, class II, DO beta
8370	HIST2H4A	L	0.0393166	histone cluster 2, H4a
1186	CLCN7	L	0.0399449	chloride channel 7
92591	ASB16	L	0.0400029	ankyrin repeat and SOCS box containing 16
140766	ADAMTS14	L	0.0400029	ADAM metallopeptidase with thrombospondin type 1 motif, 14
51726	DNAJB11	L	0.040411	DnaJ (Hsp40) homolog, subfamily B, member 11
9516	LITAF	H	0.0404453	lipopolysaccharide-induced TNF factor
1413	CRYBA4	L	0.0405894	crystallin, beta A4
23041	MON2	H	0.0408225	MON2 homolog (S. cerevisiae)
29066	ZC3H7A	H	0.0411187	zinc finger CCCH-type containing 7A
23478	SEC11A	H	0.0412675	SEC11 homolog A (S. cerevisiae)
387082	SUMO4	H	0.0412675	SMT3 suppressor of mif two 3 homolog 4 (S. cerevisiae)
375593	TRIM73	L	0.0414368	tripartite motif containing 73
22870	PPP6R1	L	0.0416564	protein phosphatase 6, regulatory subunit 1
51588	PIAS4	L	0.0417466	protein inhibitor of activated STAT, 4
55040	EPN3	L	0.0418972	epsin 3
149095	DCST1	L	0.0419576	DC-STAMP domain containing 1
55741	EDEM2	L	0.0420484	ER degradation enhancer, mannosidase alpha-like 2
221143	N6AMT2	L	0.0420787	N-6 adenine-specific DNA methyltransferase 2 (putative)
1741	DLG3	H	0.0423521	discs, large homolog 3 (Drosophila)
112401	BIRC8	H	0.042474	baculoviral IAP repeat containing 8
51099	ABHD5	H	0.042474	abhydrolase domain containing 5
64222	TOR3A	L	0.0425351	torsin family 3, member A
64750	SMURF2	H	0.0425963	SMAD specific E3 ubiquitin protein ligase 2
51667	NUB1	L	0.0428929	negative regulator of ubiquitin-like proteins 1
5222	PGA5	L	0.0432183	pepsinogen 5, group I (pepsinogen A)
3015	H2AFZ	L	0.0432432	H2A histone family, member Z
8405	SPOP	H	0.0432432	speckle-type POZ protein
55823	VPS11	H	0.0435853	vacuolar protein sorting 11 homolog (S. cerevisiae)
79960	PHF17	L	0.0437416	PHD finger protein 17
115207	KCTD12	H	0.0440871	potassium channel tetramerisation domain containing 12
4210	MEFV	L	0.0442133	Mediterranean fever
84129	ACAD11	L	0.0444893	acyl-CoA dehydrogenase family, member 11
14	AAMP	L	0.0446892	angio-associated, migratory cell protein
6005	RHAG	L	0.0447211	Rh-associated glycoprotein
135892	TRIM50	L	0.045041	tripartite motif containing 50
8836	GGH	L	0.0452016	gamma-glutamyl hydrolase (conjugase, folylpolygammaglutamyl hydrolase)
197131	UBR1	L	0.0453305	ubiquitin protein ligase E3 component n-recognin 1
1337	COX6A1	L	0.0454921	cytochrome c oxidase subunit VIa polypeptide 1
4110	MAGEA11	H	0.0461103	melanoma antigen family A, 11
7841	MOGS	H	0.0462742	mannosyl-oligosaccharide glucosidase
10497	UNC13B	L	0.0462742	unc-13 homolog B (C. elegans)
6448	SGSH	L	0.046307	N-sulfoglucosamine sulfohydrolase
398	ARHGDIG	L	0.0463728	Rho GDP dissociation inhibitor (GDI) gamma
7326	UBE2G1	H	0.0464056	ubiquitin-conjugating enzyme E2G 1 (UBC7 homolog, yeast)
3448	IFNA14	L	0.0464715	interferon, alpha 14
1409	CRYAA	L	0.0468682	crystallin, alpha A
345	APOC3	L	0.0468682	apolipoprotein C-III
374407	DNAJB13	L	0.047201	DnaJ (Hsp40) homolog, subfamily B, member 13
200933	FBXO45	H	0.0473012	F-box protein 45
158866	ZDHHC15	L	0.0473681	zinc finger, DHHC-type containing 15
255022	CALHM1	H	0.0475357	calcium homeostasis modulator 1
28983	TMPRSS11E	H	0.0475357	transmembrane protease, serine 11E
53938	PPIL3	H	0.047805	peptidylprolyl isomerase (cyclophilin)-like 3
389208	TMPRSS11F	L	0.0480755	transmembrane protease, serine 11F
79139	DERL1	L	0.0481772	Der1-like domain family, member 1
2328	FMO3	H	0.0481772	flavin containing monooxygenase 3
128486	FITM2	L	0.0487574	fat storage-inducing transmembrane protein 2
8749	ADAM18	H	0.0490869	ADAM metallopeptidase domain 18
55771	PRR11	H	0.0495169	proline rich 11
10390	CEPT1	L	0.049656	choline/ethanolamine phosphotransferase 1
9100	USP10	L	0.0498304	ubiquitin specific peptidase 10
90293	KLHL13	H	0.0505331	kelch-like 13 (Drosophila)
1572	CYP2F1	L	0.0509943	cytochrome P450, family 2, subfamily F, polypeptide 1
825	CAPN3	H	0.0511013	calpain 3, (p94)
5203	PFDN4	H	0.0511369	prefoldin subunit 4
151516	ASPRV1	L	0.0512084	aspartic peptidase, retroviral-like 1
51279	C1RL	L	0.0512799	complement component 1, r subcomponent-like
3299	HSF4	L	0.0516028	heat shock transcription factor 4
223082	ZNRF2	H	0.0519997	zinc and ring finger 2
319101	KRT73	H	0.0519997	keratin 73
27338	UBE2S	L	0.05229	ubiquitin-conjugating enzyme E2S
126792	B3GALT6	L	0.0525085	UDP-Gal:betaGal beta 1,3-galactosyltransferase polypeptide 6
90007	MIDN	H	0.0525085	midnolin
25956	SEC31B	L	0.0528746	SEC31 homolog B (S. cerevisiae)
975	CD81	L	0.0529848	CD81 molecule
9049	AIP	L	0.0533166	aryl hydrocarbon receptor interacting protein
11057	ABHD2	H	0.0535017	abhydrolase domain containing 2
2173	FABP7	H	0.053613	fatty acid binding protein 7, brain
79594	MUL1	L	0.053613	mitochondrial E3 ubiquitin protein ligase 1
119692	OR51S1	L	0.0537245	olfactory receptor, family 51, subfamily S, member 1
55858	TMEM165	H	0.0538735	transmembrane protein 165
10224	ZNF443	H	0.0541724	zinc finger protein 443
10749	KIF1C	L	0.0546235	kinesin family member 1C
3952	LEP	L	0.0546612	leptin
7965	AIMP2	L	0.0550397	aminoacyl tRNA synthetase complex-interacting multifunctional protein 2
5899	RALB	L	0.0555733	v-ral simian leukemia viral oncogene homolog B (ras related; GTP binding protein)
407	ARR3	L	0.0556499	arrestin 3, retinal (X-arrestin)
90678	LRSAM1	L	0.0556882	leucine rich repeat and sterile alpha motif containing 1
144132	DNHD1	L	0.0561497	dynein heavy chain domain 1
6907	TBL1X	L	0.056227	transducin (beta)-like 1X-linked
142685	ASB15	H	0.0565756	ankyrin repeat and SOCS box containing 15
346528	OR2A1	H	0.056887	olfactory receptor, family 2, subfamily A, member 1
7562	ZNF708	H	0.0578299	zinc finger protein 708
161725	OTUD7A	L	0.0578482	OTU domain containing 7A
8027	STAM	H	0.0578694	signal transducing adaptor molecule (SH3 domain and ITAM motif) 1
10437	IFI30	L	0.057909	interferon, gamma-inducible protein 30
55585	UBE2Q1	L	0.0583858	ubiquitin-conjugating enzyme E2Q family member 1
389898	UBE2NL	H	0.0587856	ubiquitin-conjugating enzyme E2N-like
11332	ACOT7	L	0.0588257	acyl-CoA thioesterase 7
55905	RNF114	H	0.058906	ring finger protein 114
23264	ZC3H7B	L	0.0590266	zinc finger CCCH-type containing 7B
1783	DYNC1LI2	H	0.0591474	dynein, cytoplasmic 1, light intermediate chain 2
3430	IFI35	L	0.0591877	interferon-induced protein 35
746	C11orf10	H	0.0593492	chromosome 11 open reading frame 10
123103	KLHL33	L	0.0593896	kelch-like 33 (Drosophila)
8638	OASL	L	0.0595111	2'-5'-oligoadenylate synthetase-like
284119	PTRF	L	0.0595516	polymerase I and transcript release factor
9375	TM9SF2	L	0.059958	transmembrane 9 superfamily member 2
143941	TTC36	L	0.0599807	tetratricopeptide repeat domain 36
51676	ASB2	L	0.0602439	ankyrin repeat and SOCS box containing 2
6468	FBXW4	L	0.0604077	F-box and WD repeat domain containing 4
132158	GLYCTK	L	0.0604548	glycerate kinase
84812	PLCD4	L	0.0605309	phospholipase C, delta 4
10005	ACOT8	L	0.0606954	acyl-CoA thioesterase 8
340485	ACER2	L	0.0607778	alkaline ceramidase 2
112574	SNX18	L	0.0611497	sorting nexin 18
11282	MGAT4B	L	0.0612326	mannosyl (alpha-1,3-)-glycoprotein beta-1,4-N-acetylglucosaminyltransferase, isozyme B
51666	ASB4	L	0.0613156	ankyrin repeat and SOCS box containing 4
388743	CAPN8	L	0.0614403	calpain 8
27429	HTRA2	L	0.0621927	HtrA serine peptidase 2
8925	HERC1	H	0.0624452	hect (homologous to the E6-AP (UBE3A) carboxyl terminus) domain and RCC1 (CHC1)-like domain (RLD) 1
440387	CTRB2	L	0.0624874	chymotrypsinogen B2
3852	KRT5	L	0.0627408	keratin 5
114792	KLHL32	H	0.0627408	kelch-like 32 (Drosophila)
83886	PRSS27	L	0.0628255	protease, serine 27
23746	AIPL1	L	0.0630801	aryl hydrocarbon receptor interacting protein-like 1
2997	GYS1	L	0.063293	glycogen synthase 1 (muscle)
27163	NAAA	L	0.0635919	N-acylethanolamine acid amidase
22926	ATF6	H	0.0637204	activating transcription factor 6
57542	KLHDC5	H	0.063978	kelch domain containing 5
27335	EIF3K	L	0.0641934	eukaryotic translation initiation factor 3, subunit K
51668	HSPB11	H	0.0645825	heat shock protein family B (small), member 11
10427	SEC24B	L	0.0646692	SEC24 family, member B (S. cerevisiae)
51271	UBAP1	H	0.06493	ubiquitin associated protein 1
23457	ABCB9	L	0.0650171	ATP-binding cassette, sub-family B (MDR/TAP), member 9
4637	MYL6	L	0.0651043	myosin, light chain 6, alkali, smooth muscle and non-muscle
148066	ZNRF4	L	0.0658495	zinc and ring finger 4
154865	IQUB	H	0.0660259	IQ motif and ubiquitin domain containing
6272	SORT1	H	0.0660259	sortilin 1
10559	SLC35A1	H	0.0662469	solute carrier family 35 (CMP-sialic acid transporter), member A1
1571	CYP2E1	L	0.0663355	cytochrome P450, family 2, subfamily E, polypeptide 1
4804	NGFR	L	0.0663798	nerve growth factor receptor
124739	USP43	L	0.0663798	ubiquitin specific peptidase 43
9352	TXNL1	H	0.0664098	thioredoxin-like 1
8341	HIST1H2BN	L	0.0664685	histone cluster 1, H2bn
4099	MAG	L	0.0666018	myelin associated glycoprotein
54788	DNAJB12	H	0.0667798	DnaJ (Hsp40) homolog, subfamily B, member 12
4976	OPA1	L	0.0669136	optic atrophy 1 (autosomal dominant)
140459	ASB6	L	0.0670029	ankyrin repeat and SOCS box containing 6
9830	TRIM14	H	0.0670923	tripartite motif containing 14
114780	PKD1L2	L	0.0671818	polycystic kidney disease 1-like 2
517	ATP5G2	L	0.0673162	ATP synthase, H+ transporting, mitochondrial Fo complex, subunit C2 (subunit 9)
55791	C1orf103	H	0.0673611	chromosome 1 open reading frame 103
203074	PRSS55	L	0.0675857	protease, serine, 55
283820	NOMO2	H	0.0676307	NODAL modulator 2
3930	LBR	H	0.0676758	lamin B receptor
51504	TRMT112	L	0.0677208	tRNA methyltransferase 11-2 homolog (S. cerevisiae)
170691	ADAMTS17	L	0.0679917	ADAM metallopeptidase with thrombospondin type 1 motif, 17
23423	TMED3	L	0.0682635	transmembrane emp24 protein transport domain containing 3
26262	TSPAN17	L	0.0683542	tetraspanin 17
1420	CRYGC	L	0.0687184	crystallin, gamma C
8970	HIST1H2BJ	L	0.0692216	histone cluster 1, H2bj
114885	OSBPL11	L	0.0693594	oxysterol binding protein-like 11
84619	ZGPAT	L	0.0694974	zinc finger, CCCH-type with G patch domain
23066	CAND2	L	0.0700054	cullin-associated and neddylation-dissociated 2 (putative)
2705	GJB1	L	0.0700054	gap junction protein, beta 1, 32kDa
57159	TRIM54	L	0.0701444	tripartite motif containing 54
3211	HOXB1	L	0.0704698	homeobox B1
138307	LCN8	L	0.0705164	lipocalin 8
10428	CFDP1	L	0.0705164	craniofacial development protein 1
114804	RNF157	L	0.0710773	ring finger protein 157
84083	ZRANB3	H	0.0715004	zinc finger, RAN-binding domain containing 3
153769	SH3RF2	L	0.0718309	SH3 domain containing ring finger 2
10942	PRSS21	L	0.0718365	protease, serine, 21 (testisin)
23480	SEC61G	L	0.0720203	Sec61 gamma subunit
22920	KIFAP3	L	0.0722577	kinesin-associated protein 3
10576	CCT2	H	0.0722723	chaperonin containing TCP1, subunit 2 (beta)
11230	PRAF2	L	0.0728299	PRA1 domain family, member 2
200734	SPRED2	H	0.0731175	sprouty-related, EVH1 domain containing 2
85313	PPIL4	L	0.07496	peptidylprolyl isomerase (cyclophilin)-like 4
9973	CCS	L	0.0754512	copper chaperone for superoxide dismutase
10072	DPP3	L	0.0754512	dipeptidyl-peptidase 3
10963	STIP1	L	0.0755497	stress-induced-phosphoprotein 1
28957	MRPS28	L	0.0756483	mitochondrial ribosomal protein S28
5275	SERPINB13	H	0.075846	serpin peptidase inhibitor, clade B (ovalbumin), member 13
6748	SSR4	L	0.0759449	signal sequence receptor, delta (translocon-associated protein delta)
391013	PLA2G2C	L	0.0764413	phospholipase A2, group IIC
8546	AP3B1	L	0.0765409	adaptor-related protein complex 3, beta 1 subunit
23355	VPS8	H	0.0768403	vacuolar protein sorting 8 homolog (S. cerevisiae)
55140	ELP3	H	0.0779464	elongation protein 3 homolog (S. cerevisiae)
346606	MOGAT3	L	0.0780476	monoacylglycerol O-acyltransferase 3
170575	GIMAP1	H	0.0781489	GTPase, IMAP family member 1
79982	DNAJB14	L	0.0796297	DnaJ (Hsp40) homolog, subfamily B, member 14
55336	FBXL8	L	0.0796812	F-box and leucine-rich repeat protein 8
51028	VPS36	H	0.0797327	vacuolar protein sorting 36 homolog (S. cerevisiae)
6439	SFTPB	L	0.0803009	surfactant protein B
83590	TMUB1	L	0.0809767	transmembrane and ubiquitin-like domain containing 1
3697	ITIH1	L	0.0812902	inter-alpha (globulin) inhibitor H1
79018	C17orf39	H	0.0813425	chromosome 17 open reading frame 39
23352	UBR4	H	0.0814473	ubiquitin protein ligase E3 component n-recognin 4
8344	HIST1H2BE	L	0.0814473	histone cluster 1, H2be
157506	RDH10	L	0.0815522	retinol dehydrogenase 10 (all-trans)
10905	MAN1A2	H	0.0819352	mannosidase, alpha, class 1A, member 2
55572	FOXRED1	L	0.0828191	FAD-dependent oxidoreductase domain containing 1
7405	UVRAG	L	0.0829254	UV radiation resistance associated gene
148014	TTC9B	L	0.0830851	tetratricopeptide repeat domain 9B
26223	FBXL21	H	0.0835656	F-box and leucine-rich repeat protein 21 (gene/pseudogene)
92912	UBE2Q2	H	0.0836191	ubiquitin-conjugating enzyme E2Q family member 2
4796	TONSL	L	0.0836726	tonsoku-like, DNA repair protein
363	AQP6	L	0.0836726	aquaporin 6, kidney specific
23433	RHOQ	H	0.0851834	ras homolog gene family, member Q
142689	ASB12	L	0.085401	ankyrin repeat and SOCS box containing 12
55764	IFT122	L	0.0854554	intraflagellar transport 122 homolog (Chlamydomonas)
23335	WDR7	H	0.0860565	WD repeat domain 7
6230	RPS25	H	0.0868264	ribosomal protein S25
2109	ETFB	L	0.0870474	electron-transfer-flavoprotein, beta polypeptide
51035	UBXN1	L	0.0873797	UBX domain protein 1
79444	BIRC7	L	0.0874907	baculoviral IAP repeat containing 7
83450	LRRC48	L	0.0874907	leucine rich repeat containing 48
441933	OR13G1	H	0.0879359	olfactory receptor, family 13, subfamily G, member 1
113612	CYP2U1	H	0.0881592	cytochrome P450, family 2, subfamily U, polypeptide 1
79065	ATG9A	L	0.0883269	ATG9 autophagy related 9 homolog A (S. cerevisiae)
256949	KANK3	L	0.0884389	KN motif and ankyrin repeat domains 3
399665	FAM102A	H	0.0887193	family with sequence similarity 102, member A
51752	ERAP1	L	0.0887193	endoplasmic reticulum aminopeptidase 1
80724	ACAD10	H	0.0887755	acyl-CoA dehydrogenase family, member 10
57565	KLHL14	L	0.0891695	kelch-like 14 (Drosophila)
7266	DNAJC7	H	0.0899618	DnaJ (Hsp40) homolog, subfamily C, member 7
7511	XPNPEP1	L	0.0902703	X-prolyl aminopeptidase (aminopeptidase P) 1, soluble
23194	FBXL7	L	0.0903031	F-box and leucine-rich repeat protein 7
858	CAV2	H	0.0906454	caveolin 2
8334	HIST1H2AC	L	0.0909703	histone cluster 1, H2ac
9992	KCNE2	L	0.0913906	potassium voltage-gated channel, Isk-related family, member 2
153830	RNF145	L	0.0915057	ring finger protein 145
79913	ACTR5	H	0.0915633	ARP5 actin-related protein 5 homolog (yeast)
203611	CDY2B	L	0.0917363	chromodomain protein, Y-linked, 2B
6921	TCEB1	L	0.0926049	transcription elongation factor B (SIII), polypeptide 1 (15kDa, elongin C)
25825	BACE2	L	0.0926631	beta-site APP-cleaving enzyme 2
339451	KLHL17	L	0.0928377	kelch-like 17 (Drosophila)
1361	CPB2	L	0.0928959	carboxypeptidase B2 (plasma)
29100	TMEM208	L	0.0931877	transmembrane protein 208
200845	KCTD6	H	0.0932461	potassium channel tetramerisation domain containing 6
1	A1BG	L	0.0932753	alpha-1-B glycoprotein
23378	RRP8	L	0.0935388	ribosomal RNA processing 8, methyltransferase, homolog (yeast)
9618	TRAF4	L	0.093656	TNF receptor-associated factor 4
5657	PRTN3	L	0.0938909	proteinase 3
10564	ARFGEF2	L	0.0940085	ADP-ribosylation factor guanine nucleotide-exchange factor 2 (brefeldin A-inhibited)
3661	IRF3	L	0.0942344	interferon regulatory factor 3
4628	MYH10	L	0.0942441	myosin, heavy chain 10, non-muscle
120526	DNAJC24	L	0.0945392	DnaJ (Hsp40) homolog, subfamily C, member 24
23307	FKBP15	L	0.0947167	FK506 binding protein 15, 133kDa
60681	FKBP10	L	0.095013	FK506 binding protein 10, 65 kDa
7295	TXN	H	0.0954291	thioredoxin
3699	ITIH3	L	0.0954887	inter-alpha (globulin) inhibitor H3
10476	ATP5H	L	0.0959662	ATP synthase, H+ transporting, mitochondrial Fo complex, subunit d
7327	UBE2G2	H	0.0963857	ubiquitin-conjugating enzyme E2G 2 (UBC7 homolog, yeast)
539	ATP5O	L	0.0975921	ATP synthase, H+ transporting, mitochondrial F1 complex, O subunit
407738	FAM19A1	H	0.0975921	family with sequence similarity 19 (chemokine (C-C motif)-like), member A1
10786	SLC17A3	H	0.0985049	solute carrier family 17 (sodium phosphate), member 3
9657	IQCB1	H	0.0989332	IQ motif containing B1
26580	BSCL2	L	0.0997146	Berardinelli-Seip congenital lipodystrophy 2 (seipin)
341	APOC1	L	0.0997325	apolipoprotein C-I
257160	RNF214	L	0.0997942	ring finger protein 214
1819	DRG2	L	0.0999795	developmentally regulated GTP binding protein 2
26154	ABCA12	L	0.100103	ATP-binding cassette, sub-family A (ABC1), member 12
84164	ASCC2	L	0.101035	activating signal cointegrator 1 complex subunit 2
89874	SLC25A21	L	0.101284	solute carrier family 25 (mitochondrial oxodicarboxylate carrier), member 21
29785	CYP2S1	L	0.101472	cytochrome P450, family 2, subfamily S, polypeptide 1
196743	PAOX	L	0.101597	polyamine oxidase (exo-N4-amino)
54585	LZTFL1	H	0.101659	leucine zipper transcription factor-like 1
339	APOBEC1	H	0.101785	apolipoprotein B mRNA editing enzyme, catalytic polypeptide 1
842	CASP9	H	0.102036	caspase 9, apoptosis-related cysteine peptidase
9520	NPEPPS	L	0.102161	aminopeptidase puromycin sensitive
4969	OGN	H	0.102224	osteoglycin
7871	SLMAP	H	0.102287	sarcolemma associated protein
165721	DNAJB8	L	0.102476	DnaJ (Hsp40) homolog, subfamily B, member 8
26130	GAPVD1	H	0.102602	GTPase activating protein and VPS9 domains 1
11016	ATF7	H	0.102855	activating transcription factor 7
132724	TMPRSS11B	L	0.102855	transmembrane protease, serine 11B
123879	DCUN1D3	H	0.102918	DCN1, defective in cullin neddylation 1, domain containing 3 (S. cerevisiae)
28962	OSTM1	L	0.103235	osteopetrosis associated transmembrane protein 1
9929	JOSD1	L	0.104125	Josephin domain containing 1
1465	CSRP1	L	0.104573	cysteine and glycine-rich protein 1
27173	SLC39A1	L	0.104958	solute carrier family 39 (zinc transporter), member 1
90933	TRIM41	L	0.104958	tripartite motif containing 41
9421	HAND1	L	0.105408	heart and neural crest derivatives expressed 1
10150	MBNL2	H	0.105667	muscleblind-like 2 (Drosophila)
49	ACR	H	0.105925	acrosin
10856	RUVBL2	H	0.106055	RuvB-like 2 (E. coli)
90423	ATP6V1E2	L	0.106249	ATPase, H+ transporting, lysosomal 31kDa, V1 subunit E2
91074	ANKRD30A	H	0.106639	ankyrin repeat domain 30A
2923	PDIA3	L	0.106704	protein disulfide isomerase family A, member 3
84541	KBTBD8	H	0.10703	kelch repeat and BTB (POZ) domain containing 8
10598	AHSA1	L	0.10716	AHA1, activator of heat shock 90kDa protein ATPase homolog 1 (yeast)
10430	TMEM147	L	0.10716	transmembrane protein 147
3487	IGFBP4	L	0.107291	insulin-like growth factor binding protein 4
30819	KCNIP2	H	0.107422	Kv channel interacting protein 2
9097	USP14	H	0.107487	ubiquitin specific peptidase 14 (tRNA-guanine transglycosylase)
64843	ISL2	L	0.107815	ISL LIM homeobox 2
11015	KDELR3	H	0.107815	KDEL (Lys-Asp-Glu-Leu) endoplasmic reticulum protein retention receptor 3
146760	RTN4RL1	L	0.107946	reticulon 4 receptor-like 1
1551	CYP3A7	H	0.108012	cytochrome P450, family 3, subfamily A, polypeptide 7
11182	SLC2A6	L	0.108012	solute carrier family 2 (facilitated glucose transporter), member 6
5007	OSBP	H	0.108078	oxysterol binding protein
338917	VSX2	L	0.108375	visual system homeobox 2
6522	SLC4A2	L	0.108671	solute carrier family 4, anion exchanger, member 2 (erythrocyte membrane protein band 3-like 1)
4125	MAN2B1	L	0.109399	mannosidase, alpha, class 2B, member 1
54620	FBXL19	L	0.109399	F-box and leucine-rich repeat protein 19
79947	DHDDS	H	0.109399	dehydrodolichyl diphosphate synthase
6811	STX5	L	0.109598	syntaxin 5
10874	NMU	L	0.110065	neuromedin U
84572	GNPTG	L	0.110198	N-acetylglucosamine-1-phosphate transferase, gamma subunit
113457	TUBA3D	L	0.110198	tubulin, alpha 3d
128869	PIGU	H	0.110332	phosphatidylinositol glycan anchor biosynthesis, class U
1211	CLTA	H	0.110599	clathrin, light chain A
54504	CPVL	H	0.110666	carboxypeptidase, vitellogenic-like
116541	MRPL54	L	0.11154	mitochondrial ribosomal protein L54
8909	ENDOU	L	0.111742	endonuclease, polyU-specific
339122	RAB43	L	0.111849	RAB43, member RAS oncogene family
22954	TRIM32	L	0.11344	tripartite motif containing 32
91057	CCDC34	L	0.113577	coiled-coil domain containing 34
133619	PRRC1	L	0.113782	proline-rich coiled-coil 1
51136	RNFT1	H	0.11385	ring finger protein, transmembrane 1
3012	HIST1H2AE	L	0.114606	histone cluster 1, H2ae
81790	RNF170	L	0.115015	ring finger protein 170
10493	VAT1	L	0.115227	vesicle amine transport protein 1 homolog (T. californica)
90701	SEC11C	L	0.115296	SEC11 homolog C (S. cerevisiae)
3069	HDLBP	H	0.117176	high density lipoprotein binding protein
2852	GPER	L	0.117949	G protein-coupled estrogen receptor 1
374977	HEATR8	L	0.117979	HEAT repeat containing 8
56262	LRRC8A	L	0.118939	leucine rich repeat containing 8 family, member A
2999	GZMH	L	0.11901	granzyme H (cathepsin G-like 2, protein h-CCPX)
7267	TTC3	H	0.119935	tetratricopeptide repeat domain 3
2255	FGF10	L	0.12022	fibroblast growth factor 10
9784	SNX17	L	0.120435	sorting nexin 17
10239	AP3S2	L	0.120865	adaptor-related protein complex 3, sigma 2 subunit
3083	HGFAC	L	0.121081	HGF activator
81932	HDHD3	L	0.121296	haloacid dehalogenase-like hydrolase domain containing 3
2867	FFAR2	L	0.121369	free fatty acid receptor 2
23500	DAAM2	L	0.121801	dishevelled associated activator of morphogenesis 2
23033	DOPEY1	H	0.12238	dopey family member 1
147011	PROCA1	L	0.122453	protein interacting with cyclin A1
55148	UBR7	H	0.122453	ubiquitin protein ligase E3 component n-recognin 7 (putative)
81844	TRIM56	L	0.122598	tripartite motif containing 56
7024	TFCP2	H	0.122598	transcription factor CP2
23268	DNMBP	L	0.122889	dynamin binding protein
8425	LTBP4	L	0.122889	latent transforming growth factor beta binding protein 4
29887	SNX10	H	0.12318	sorting nexin 10
54760	PCSK4	L	0.123984	proprotein convertase subtilisin/kexin type 4
63974	NEUROD6	H	0.124644	neurogenic differentiation 6
136227	EMID2	L	0.124718	EMI domain containing 2
255738	PCSK9	L	0.124939	proprotein convertase subtilisin/kexin type 9
196441	ZFC3H1	H	0.125234	zinc finger, C3H1-type containing
81502	HM13	L	0.125648	histocompatibility (minor) 13
23409	SIRT4	L	0.125677	sirtuin 4
84315	MON1A	L	0.126048	MON1 homolog A (yeast)
522	ATP5J	L	0.126196	ATP synthase, H+ transporting, mitochondrial Fo complex, subunit F6
7265	TTC1	H	0.126568	tetratricopeptide repeat domain 1
54896	PQLC2	L	0.128439	PQ loop repeat containing 2
8988	HSPB3	H	0.128665	heat shock 27kDa protein 3
11274	USP18	H	0.129724	ubiquitin specific peptidase 18
11336	EXOC3	H	0.1298	exocyst complex component 3
950	SCARB2	H	0.13018	scavenger receptor class B, member 2
1388	ATF6B	L	0.13018	activating transcription factor 6 beta
284098	PIGW	H	0.130637	phosphatidylinositol glycan anchor biosynthesis, class W
2773	GNAI3	H	0.130866	guanine nucleotide binding protein (G protein), alpha inhibiting activity polypeptide 3
28988	DBNL	L	0.130942	drebrin-like
79157	MFSD11	H	0.131248	major facilitator superfamily domain containing 11
51360	MBTPS2	H	0.131402	membrane-bound transcription factor peptidase, site 2
26609	VCX	L	0.131862	variable charge, X-linked
23518	R3HDM1	H	0.132632	R3H domain containing 1
23237	ARC	L	0.132864	activity-regulated cytoskeleton-associated protein
7311	UBA52	L	0.133225	ubiquitin A-52 residue ribosomal protein fusion product 1
88455	ANKRD13A	L	0.133251	ankyrin repeat domain 13A
10024	TROAP	L	0.133406	trophinin associated protein (tastin)
3700	ITIH4	L	0.133794	inter-alpha (globulin) inhibitor H4 (plasma Kallikrein-sensitive glycoprotein)
5013	OTX1	L	0.134651	orthodenticle homeobox 1
79089	TMUB2	L	0.134807	transmembrane and ubiquitin-like domain containing 2
79791	FBXO31	L	0.135042	F-box protein 31
5125	PCSK5	L	0.13512	proprotein convertase subtilisin/kexin type 5
10808	HSPH1	L	0.135277	heat shock 105kDa/110kDa protein 1
22820	COPG	L	0.135512	coatomer protein complex, subunit gamma
86	ACTL6A	H	0.135747	actin-like 6A
2720	GLB1	L	0.13622	galactosidase, beta 1
5696	PSMB8	L	0.137168	proteasome (prosome, macropain) subunit, beta type, 8 (large multifunctional peptidase 7)
27131	SNX5	H	0.137326	sorting nexin 5
401720	FIGNL2	H	0.137326	fidgetin-like 2
122706	PSMB11	L	0.137485	proteasome (prosome, macropain) subunit, beta type, 11
6782	HSPA13	H	0.137485	heat shock protein 70kDa family, member 13
57599	WDR48	L	0.137644	WD repeat domain 48
1522	CTSZ	L	0.137962	cathepsin Z
6642	SNX1	L	0.13828	sorting nexin 1
29071	C1GALT1C1	H	0.13844	C1GALT1-specific chaperone 1
3188	HNRNPH2	H	0.138759	heterogeneous nuclear ribonucleoprotein H2 (H')
215	ABCD1	L	0.138839	ATP-binding cassette, sub-family D (ALD), member 1
23640	HSPBP1	L	0.138999	HSPA (heat shock 70kDa) binding protein, cytoplasmic cochaperone 1
9653	HS2ST1	L	0.139079	heparan sulfate 2-O-sulfotransferase 1
6047	RNF4	L	0.139239	ring finger protein 4
55063	ZCWPW1	H	0.139721	zinc finger, CW type with PWWP domain 1
122618	PLD4	L	0.139882	phospholipase D family, member 4
117155	CATSPER2	L	0.139882	cation channel, sperm associated 2
6453	ITSN1	L	0.140204	intersectin 1 (SH3 domain protein)
10346	TRIM22	H	0.140526	tripartite motif containing 22
83693	HSDL1	H	0.142392	hydroxysteroid dehydrogenase like 1
30001	ERO1L	H	0.142392	ERO1-like (S. cerevisiae)
55958	KLHL9	H	0.142392	kelch-like 9 (Drosophila)
55432	YOD1	H	0.142473	YOD1 OTU deubiquinating enzyme 1 homolog (S. cerevisiae)
79879	CCDC134	L	0.142555	coiled-coil domain containing 134
525	ATP6V1B1	L	0.142637	ATPase, H+ transporting, lysosomal 56/58kDa, V1 subunit B1
5611	DNAJC3	H	0.142963	DnaJ (Hsp40) homolog, subfamily C, member 3
10945	KDELR1	L	0.143373	KDEL (Lys-Asp-Glu-Leu) endoplasmic reticulum protein retention receptor 1
10462	CLEC10A	H	0.143373	C-type lectin domain family 10, member A
80331	DNAJC5	L	0.143455	DnaJ (Hsp40) homolog, subfamily C, member 5
27154	BRPF3	H	0.143455	bromodomain and PHD finger containing, 3
11335	CBX3	L	0.143701	chromobox homolog 3
1113	CHGA	L	0.143947	chromogranin A (parathyroid secretory protein 1)
10811	NOXA1	L	0.144068	NADPH oxidase activator 1
6650	SOLH	L	0.144276	small optic lobes homolog (Drosophila)
9093	DNAJA3	L	0.144689	DnaJ (Hsp40) homolog, subfamily A, member 3
9761	MLEC	H	0.144771	malectin
23197	FAF2	H	0.145267	Fas associated factor family member 2
79156	PLEKHF1	L	0.14535	pleckstrin homology domain containing, family F (with FYVE domain) member 1
126393	HSPB6	L	0.145599	heat shock protein, alpha-crystallin-related, B6
284207	METRNL	L	0.145931	meteorin, glial cell differentiation regulator-like
1657	DMXL1	H	0.146014	Dmx-like 1
8748	ADAM20	L	0.14668	ADAM metallopeptidase domain 20
338692	ANKRD13D	L	0.147629	ankyrin repeat domain 13 family, member D
26088	GGA1	L	0.147683	golgi-associated, gamma adaptin ear containing, ARF binding protein 1
10960	LMAN2	H	0.147935	lectin, mannose-binding 2
84284	NTPCR	L	0.147935	nucleoside-triphosphatase, cancer-related
11196	SEC23IP	H	0.148187	SEC23 interacting protein
10618	TGOLN2	L	0.148187	trans-golgi network protein 2
130733	TMEM178	H	0.148271	transmembrane protein 178
10966	RAB40B	L	0.148776	RAB40B, member RAS oncogene family
5877	RABIF	H	0.1503	RAB interacting factor
23385	NCSTN	L	0.15064	nicastrin
81562	LMAN2L	H	0.150996	lectin, mannose-binding 2-like
166655	TRIM60	L	0.151152	tripartite motif containing 60
118987	PDZD8	L	0.151836	PDZ domain containing 8
114789	SLC25A25	L	0.152093	solute carrier family 25 (mitochondrial carrier; phosphate carrier), member 25
23265	EXOC7	L	0.152394	exocyst complex component 7
84893	FBXO18	L	0.152608	F-box protein, helicase, 18
10156	RASA4	H	0.152745	RAS p21 protein activator 4
285237	C3orf38	H	0.154248	chromosome 3 open reading frame 38
11275	KLHL2	H	0.154768	kelch-like 2, Mayven (Drosophila)
51107	APH1A	L	0.15529	anterior pharynx defective 1 homolog A (C. elegans)
51014	TMED7	L	0.155988	transmembrane emp24 protein transport domain containing 7
23024	PDZRN3	L	0.156251	PDZ domain containing ring finger 3
10972	TMED10	H	0.156864	transmembrane emp24-like trafficking protein 10 (yeast)
8774	NAPG	H	0.157304	N-ethylmaleimide-sensitive factor attachment protein, gamma
23130	ATG2A	L	0.157568	ATG2 autophagy related 2 homolog A (S. cerevisiae)
5239	PGM5	L	0.157744	phosphoglucomutase 5
55171	TBCCD1	H	0.158362	TBCC domain containing 1
5080	PAX6	H	0.158362	paired box 6
23759	PPIL2	H	0.158539	peptidylprolyl isomerase (cyclophilin)-like 2
51465	UBE2J1	H	0.159159	ubiquitin-conjugating enzyme E2, J1 (UBC6 homolog, yeast)
57140	RNPEPL1	L	0.159515	arginyl aminopeptidase (aminopeptidase B)-like 1
158056	MAMDC4	L	0.15996	MAM domain containing 4
259217	HSPA12A	H	0.160584	heat shock 70kDa protein 12A
121457	IKBIP	H	0.161031	IKBKB interacting protein
55027	HEATR3	L	0.161031	HEAT repeat containing 3
2281	FKBP1B	H	0.161479	FK506 binding protein 1B, 12.6 kDa
254225	RNF169	L	0.161659	ring finger protein 169
11070	TMEM115	L	0.161722	transmembrane protein 115
283450	C12orf51	H	0.162289	chromosome 12 open reading frame 51
143570	XRRA1	H	0.162379	X-ray radiation resistance associated 1
22838	RNF44	L	0.163191	ring finger protein 44
90850	ZNF598	L	0.163644	zinc finger protein 598
116835	HSPA12B	L	0.163825	heat shock 70kD protein 12B
23471	TRAM1	L	0.164188	translocation associated membrane protein 1
54494	C11orf71	L	0.164279	chromosome 11 open reading frame 71
374286	CDRT1	L	0.164552	CMT1A duplicated region transcript 1
165324	UBXN2A	L	0.165099	UBX domain protein 2A
22999	RIMS1	H	0.165099	regulating synaptic membrane exocytosis 1
26063	DECR2	L	0.16519	2,4-dienoyl CoA reductase 2, peroxisomal
54793	KCTD9	L	0.165281	potassium channel tetramerisation domain containing 9
120103	SLC36A4	L	0.165464	solute carrier family 36 (proton/amino acid symporter), member 4
2107	ETF1	L	0.165516	eukaryotic translation termination factor 1
373	TRIM23	H	0.16583	tripartite motif containing 23
9354	UBE4A	L	0.16583	ubiquitination factor E4A (UFD2 homolog, yeast)
22878	TRAPPC8	L	0.166563	trafficking protein particle complex 8
255798	C3orf43	L	0.166563	chromosome 3 open reading frame 43
23225	NUP210	L	0.167115	nucleoporin 210kDa
150275	CCDC117	H	0.167115	coiled-coil domain containing 117
63973	NEUROG2	L	0.167207	neurogenin 2
339501	PRSS38	L	0.167299	protease, serine, 38
3300	DNAJB2	L	0.167392	DnaJ (Hsp40) homolog, subfamily B, member 2
9456	HOMER1	H	0.167484	homer homolog 1 (Drosophila)
26103	LRIT1	L	0.167668	leucine-rich repeat, immunoglobulin-like and transmembrane domains 1
26031	OSBPL3	H	0.167853	oxysterol binding protein-like 3
151835	CPNE9	L	0.16813	copine family member IX
2542	SLC37A4	L	0.168408	solute carrier family 37 (glucose-6-phosphate transporter), member 4
26263	FBXO22	L	0.168686	F-box protein 22
26286	ARFGAP3	L	0.168964	ADP-ribosylation factor GTPase activating protein 3
10126	DNAL4	L	0.16915	dynein, axonemal, light chain 4
550	AUP1	L	0.169522	ancient ubiquitous protein 1
23466	CBX6	L	0.169895	chromobox homolog 6
27129	HSPB7	H	0.169895	heat shock 27kDa protein family, member 7 (cardiovascular)
285755	PPIL6	H	0.169895	peptidylprolyl isomerase (cyclophilin)-like 6
2668	GDNF	H	0.170268	glial cell derived neurotrophic factor
6950	TCP1	H	0.170361	t-complex 1
25977	NECAP1	H	0.170614	NECAP endocytosis associated 1
115273	RAB42	L	0.170735	RAB42, member RAS oncogene family
3382	ICA1	H	0.170735	islet cell autoantigen 1, 69kDa
11074	TRIM31	L	0.171391	tripartite motif containing 31
55033	FKBP14	L	0.171673	FK506 binding protein 14, 22 kDa
3444	IFNA7	L	0.172143	interferon, alpha 7
54938	SARS2	L	0.17252	seryl-tRNA synthetase 2, mitochondrial
51098	IFT52	L	0.17252	intraflagellar transport 52 homolog (Chlamydomonas)
64859	OBFC2A	H	0.172614	oligonucleotide/oligosaccharide-binding fold containing 2A
401265	KLHL31	L	0.172709	kelch-like 31 (Drosophila)
58505	OSTC	H	0.1734	oligosaccharyltransferase complex subunit
113878	DTX2	L	0.173465	deltex homolog 2 (Drosophila)
27067	STAU2	H	0.174129	staufen, RNA binding protein, homolog 2 (Drosophila)
81545	FBXO38	H	0.174604	F-box protein 38
389668	XKR9	H	0.174604	XK, Kell blood group complex subunit-related family, member 9
338328	GPIHBP1	L	0.174985	glycosylphosphatidylinositol anchored high density lipoprotein binding protein 1
7805	LAPTM5	H	0.174985	lysosomal protein transmembrane 5
3107	HLA-C	L	0.175175	major histocompatibility complex, class I, C
2289	FKBP5	H	0.175244	FK506 binding protein 5
5768	QSOX1	L	0.175844	quiescin Q6 sulfhydryl oxidase 1
23095	KIF1B	L	0.176227	kinesin family member 1B
3003	GZMK	H	0.176419	granzyme K (granzyme 3; tryptase II)
158506	ZNF645	L	0.176419	zinc finger protein 645
23436	CELA3B	L	0.176419	chymotrypsin-like elastase family, member 3B
336	APOA2	L	0.176515	apolipoprotein A-II
283849	EXOC3L1	L	0.177187	exocyst complex component 3-like 1
146330	FBXL16	L	0.177861	F-box and leucine-rich repeat protein 16
55182	RNF220	H	0.177861	ring finger protein 220
199974	CYP4Z1	H	0.178731	cytochrome P450, family 4, subfamily Z, polypeptide 1
10715	LASS1	L	0.179022	LAG1 homolog, ceramide synthase 1
130355	C2orf76	L	0.179313	chromosome 2 open reading frame 76
5190	PEX6	L	0.17941	peroxisomal biogenesis factor 6
120146	TRIM64	H	0.179507	tripartite motif containing 64
9248	GPR50	L	0.179701	G protein-coupled receptor 50
11152	WDR45	H	0.179799	WD repeat domain 45
29089	UBE2T	L	0.179993	ubiquitin-conjugating enzyme E2T (putative)
57465	TBC1D24	L	0.180188	TBC1 domain family, member 24
149986	LSM14B	L	0.181555	LSM14B, SCD6 homolog B (S. cerevisiae)
84275	SLC25A33	L	0.182046	solute carrier family 25, member 33
9306	SOCS6	H	0.182537	suppressor of cytokine signaling 6
5648	MASP1	L	0.182832	mannan-binding lectin serine peptidase 1 (C4/C2 activating component of Ra-reactive factor)
145567	TTC7B	L	0.182931	tetratricopeptide repeat domain 7B
170692	ADAMTS18	H	0.183029	ADAM metallopeptidase with thrombospondin type 1 motif, 18
4621	MYH3	L	0.183424	myosin, heavy chain 3, skeletal muscle, embryonic
27075	TSPAN13	L	0.183918	tetraspanin 13
80124	VCPIP1	H	0.184314	valosin containing protein (p97)/p47 complex interacting protein 1
6049	RNF6	H	0.18471	ring finger protein (C3H2C3 type) 6
284697	BTBD8	H	0.184909	BTB (POZ) domain containing 8
85479	DNAJC5B	L	0.185107	DnaJ (Hsp40) homolog, subfamily C, member 5 beta
10262	SF3B4	H	0.185207	splicing factor 3b, subunit 4, 49kDa
386617	KCTD8	H	0.185306	potassium channel tetramerisation domain containing 8
120227	CYP2R1	H	0.185406	cytochrome P450, family 2, subfamily R, polypeptide 1
440730	TRIM67	L	0.185505	tripartite motif containing 67
94097	SFXN5	L	0.185505	sideroflexin 5
3801	KIFC3	L	0.185505	kinesin family member C3
8473	OGT	H	0.186502	O-linked N-acetylglucosamine (GlcNAc) transferase (UDP-N-acetylglucosamine:polypeptide-N-acetylglucosaminyl transferase)
11041	B3GNT1	L	0.187805	UDP-GlcNAc:betaGal beta-1,3-N-acetylglucosaminyltransferase 1
85015	USP45	H	0.187905	ubiquitin specific peptidase 45
55254	TMEM39A	H	0.188006	transmembrane protein 39A
642446	TRIM64B	L	0.188106	tripartite motif containing 64B
197322	ACSF3	L	0.188106	acyl-CoA synthetase family member 3
1810	DR1	L	0.18871	down-regulator of transcription 1, TBP-binding (negative cofactor 2)
5978	REST	H	0.18871	RE1-silencing transcription factor
4358	MPV17	L	0.189518	MpV17 mitochondrial inner membrane protein
399979	SNX19	L	0.18972	sorting nexin 19
414301	DDI1	L	0.190227	DNA-damage inducible 1 homolog 1 (S. cerevisiae)
143279	HECTD2	H	0.190531	HECT domain containing 2
57484	RNF150	H	0.190937	ring finger protein 150
3426	CFI	H	0.192672	complement factor I
23585	TMEM50A	L	0.192876	transmembrane protein 50A
23760	PITPNB	L	0.192979	phosphatidylinositol transfer protein, beta
9531	BAG3	L	0.192979	BCL2-associated athanogene 3
51652	VPS24	H	0.192979	vacuolar protein sorting 24 homolog (S. cerevisiae)
266747	RGL4	H	0.193594	ral guanine nucleotide dissociation stimulator-like 4
51449	PCYOX1	L	0.193697	prenylcysteine oxidase 1
10753	CAPN9	L	0.194314	calpain 9
55154	MSTO1	H	0.194623	misato homolog 1 (Drosophila)
84901	NFATC2IP	H	0.194933	nuclear factor of activated T-cells, cytoplasmic, calcineurin-dependent 2 interacting protein
23624	CBLC	L	0.195036	Cas-Br-M (murine) ecotropic retroviral transforming sequence c
7174	TPP2	L	0.195139	tripeptidyl peptidase II
57486	NLN	H	0.195864	neurolysin (metallopeptidase M3 family)
58511	DNASE2B	H	0.196071	deoxyribonuclease II beta
22893	BAHD1	H	0.196486	bromo adjacent homology domain containing 1
4134	MAP4	L	0.19659	microtubule-associated protein 4
84162	KIAA1109	H	0.196694	KIAA1109
89781	HPS4	H	0.197318	Hermansky-Pudlak syndrome 4
55284	UBE2W	H	0.197735	ubiquitin-conjugating enzyme E2W (putative)
9765	ZFYVE16	H	0.198152	zinc finger, FYVE domain containing 16
93979	CPA5	L	0.198361	carboxypeptidase A5
4147	MATN2	H	0.198571	matrilin 2
55435	AP1AR	H	0.198989	adaptor-related protein complex 1 associated regulatory protein
10444	ZER1	L	0.199094	zer-1 homolog (C. elegans)
6498	SKIL	H	0.199409	SKI-like oncogene
2693	GHSR	L	0.200355	growth hormone secretagogue receptor
23071	ERP44	L	0.200566	endoplasmic reticulum protein 44
518	ATP5G3	H	0.200671	ATP synthase, H+ transporting, mitochondrial Fo complex, subunit C3 (subunit 9)
23650	TRIM29	H	0.200671	tripartite motif containing 29
3171	FOXA3	L	0.200882	forkhead box A3
5118	PCOLCE	L	0.201305	procollagen C-endopeptidase enhancer
54800	KLHL24	L	0.201411	kelch-like 24 (Drosophila)
25839	COG4	L	0.201622	component of oligomeric golgi complex 4
56265	CPXM1	L	0.202046	carboxypeptidase X (M14 family), member 1
79102	RNF26	L	0.203214	ring finger protein 26
143872	ARHGAP42	L	0.204387	Rho GTPase activating protein 42
57089	ENTPD7	H	0.204494	ectonucleoside triphosphate diphosphohydrolase 7
9903	KLHL21	L	0.204601	kelch-like 21 (Drosophila)
7353	UFD1L	H	0.204922	ubiquitin fusion degradation 1 like (yeast)
33	ACADL	H	0.205457	acyl-CoA dehydrogenase, long chain
84938	ATG4C	L	0.205779	ATG4 autophagy related 4 homolog C (S. cerevisiae)
27183	VPS4A	L	0.206102	vacuolar protein sorting 4 homolog A (S. cerevisiae)
283807	FBXL22	L	0.206209	F-box and leucine-rich repeat protein 22
23647	ARFIP2	L	0.20664	ADP-ribosylation factor interacting protein 2
127247	ASB17	H	0.206855	ankyrin repeat and SOCS box containing 17
143888	KDELC2	L	0.206855	KDEL (Lys-Asp-Glu-Leu) containing 2
85865	GTPBP10	L	0.207071	GTP-binding protein 10 (putative)
55554	KLK15	L	0.207287	kallikrein-related peptidase 15
11124	FAF1	L	0.207935	Fas (TNFRSF6) associated factor 1
23241	PACS2	L	0.20826	phosphofurin acidic cluster sorting protein 2
137492	VPS37A	H	0.208369	vacuolar protein sorting 37 homolog A (S. cerevisiae)
123624	AGBL1	L	0.208585	ATP/GTP binding protein-like 1
3257	HPS1	L	0.208694	Hermansky-Pudlak syndrome 1
84206	MEX3B	L	0.208802	mex-3 homolog B (C. elegans)
1073	CFL2	L	0.209346	cofilin 2 (muscle)
158584	FAAH2	H	0.209454	fatty acid amide hydrolase 2
1660	DHX9	H	0.209524	DEAH (Asp-Glu-Ala-His) box polypeptide 9
84727	SPSB2	L	0.210217	splA/ryanodine receptor domain and SOCS box containing 2
3313	HSPA9	H	0.210872	heat shock 70kDa protein 9 (mortalin)
129642	MBOAT2	H	0.210872	membrane bound O-acyltransferase domain containing 2
3670	ISL1	L	0.211857	ISL LIM homeobox 1
11173	ADAMTS7	L	0.212427	ADAM metallopeptidase with thrombospondin type 1 motif, 7
85235	HIST1H2AH	L	0.212516	histone cluster 1, H2ah
347051	SLC10A5	L	0.212736	solute carrier family 10 (sodium/bile acid cotransporter family), member 5
163589	TDRD5	H	0.212736	tudor domain containing 5
9960	USP3	L	0.212846	ubiquitin specific peptidase 3
6102	RP2	L	0.213397	retinitis pigmentosa 2 (X-linked recessive)
645836	USP17L3	L	0.213506	ubiquitin specific peptidase 17-like 3
26119	LDLRAP1	L	0.213507	low density lipoprotein receptor adaptor protein 1
84696	ABHD1	H	0.213618	abhydrolase domain containing 1
126282	TNFAIP8L1	L	0.213618	tumor necrosis factor, alpha-induced protein 8-like 1
341277	OVCH2	L	0.213838	ovochymase 2 (gene/pseudogene)
51303	FKBP11	H	0.214502	FK506 binding protein 11, 19 kDa
79901	CYBRD1	L	0.214502	cytochrome b reductase 1
51715	RAB23	H	0.214723	RAB23, member RAS oncogene family
2800	GOLGA1	H	0.214945	golgin A1
80700	UBXN6	L	0.214945	UBX domain protein 6
63874	ABHD4	L	0.215166	abhydrolase domain containing 4
23014	FBXO21	H	0.21561	F-box protein 21
5706	PSMC6	L	0.215833	proteasome (prosome, macropain) 26S subunit, ATPase, 6
58528	RRAGD	H	0.215833	Ras-related GTP binding D
26503	SLC17A5	H	0.216166	solute carrier family 17 (anion/sugar transporter), member 5
10640	EXOC5	H	0.216278	exocyst complex component 5
149371	EXOC8	L	0.216946	exocyst complex component 8
3995	FADS3	L	0.217281	fatty acid desaturase 3
8355	HIST1H3G	L	0.217952	histone cluster 1, H3g
3298	HSF2	L	0.218288	heat shock transcription factor 2
5017	OVOL1	L	0.218288	ovo-like 1(Drosophila)
23673	STX12	H	0.218512	syntaxin 12
341350	OVCH1	H	0.219237	ovochymase 1
51296	SLC15A3	L	0.219524	solute carrier family 15, member 3
10422	UBAC1	H	0.219749	UBA domain containing 1
3273	HRG	H	0.219861	histidine-rich glycoprotein
824	CAPN2	L	0.220087	calpain 2, (m/II) large subunit
6656	SOX1	L	0.220312	SRY (sex determining region Y)-box 1
253175	CDY1B	L	0.221556	chromodomain protein, Y-linked, 1B
27031	NPHP3	L	0.221773	nephronophthisis 3 (adolescent)
23595	ORC3	L	0.222123	origin recognition complex, subunit 3
285148	IAH1	L	0.22235	isoamyl acetate-hydrolyzing esterase 1 homolog (S. cerevisiae)
1212	CLTB	L	0.222584	clathrin, light chain B
326624	RAB37	L	0.222691	RAB37, member RAS oncogene family
26958	COPG2	H	0.222804	coatomer protein complex, subunit gamma 2
2776	GNAQ	H	0.222804	guanine nucleotide binding protein (G protein), q polypeptide
11267	SNF8	L	0.223259	SNF8, ESCRT-II complex subunit, homolog (S. cerevisiae)
10964	IFI44L	H	0.224058	interferon-induced protein 44-like
242	ALOX12B	L	0.224744	arachidonate 12-lipoxygenase, 12R type
137964	AGPAT6	L	0.224858	1-acylglycerol-3-phosphate O-acyltransferase 6 (lysophosphatidic acid acyltransferase, zeta)
9507	ADAMTS4	L	0.225431	ADAM metallopeptidase with thrombospondin type 1 motif, 4
51661	FKBP7	H	0.225775	FK506 binding protein 7
27005	USP21	L	0.22589	ubiquitin specific peptidase 21
643847	PGA4	L	0.226085	pepsinogen 4, group I (pepsinogen A)
170690	ADAMTS16	H	0.226465	ADAM metallopeptidase with thrombospondin type 1 motif, 16
200879	LIPH	H	0.226925	lipase, member H
6166	RPL36AL	L	0.227041	ribosomal protein L36a-like
23142	DCUN1D4	L	0.227618	DCN1, defective in cullin neddylation 1, domain containing 4 (S. cerevisiae)
377007	KLHL30	L	0.227618	kelch-like 30 (Drosophila)
26128	KIAA1279	H	0.22808	KIAA1279
79841	AGBL2	L	0.228659	ATP/GTP binding protein-like 2
260293	CYP4X1	H	0.228659	cytochrome P450, family 4, subfamily X, polypeptide 1
372	ARCN1	L	0.229703	archain 1
11047	ADRM1	L	0.230168	adhesion regulating molecule 1
54849	DEF8	L	0.230168	differentially expressed in FDCP 8 homolog (mouse)
84640	USP38	H	0.231217	ubiquitin specific peptidase 38
56995	TULP4	H	0.231334	tubby like protein 4
23380	SRGAP2	L	0.23227	SLIT-ROBO Rho GTPase activating protein 2
4481	MSR1	L	0.233209	macrophage scavenger receptor 1
257068	PLCXD2	L	0.233209	phosphatidylinositol-specific phospholipase C, X domain containing 2
392197	USP17L7	H	0.233914	ubiquitin specific peptidase 17-like 7
60676	PAPPA2	L	0.23415	pappalysin 2
23431	AP4E1	L	0.234386	adaptor-related protein complex 4, epsilon 1 subunit
3001	GZMA	L	0.234622	granzyme A (granzyme 1, cytotoxic T-lymphocyte-associated serine esterase 3)
3638	INSIG1	L	0.234622	insulin induced gene 1
5552	SRGN	L	0.235094	serglycin
375346	TMEM110	L	0.235449	transmembrane protein 110
255394	TCP11L2	H	0.235804	t-complex 11 (mouse)-like 2
64129	TINAGL1	L	0.235922	tubulointerstitial nephritis antigen-like 1
4118	MAL	L	0.23699	mal, T-cell differentiation protein
10307	APBB3	L	0.237347	amyloid beta (A4) precursor protein-binding, family B, member 3
81559	TRIM11	L	0.237466	tripartite motif containing 11
55379	LRRC59	L	0.238419	leucine rich repeat containing 59
79595	SAP130	L	0.238658	Sin3A-associated protein, 130kDa
6764	ST5	H	0.238897	suppression of tumorigenicity 5
254863	C17orf61	L	0.239495	chromosome 17 open reading frame 61
284541	CYP4A22	L	0.239734	cytochrome P450, family 4, subfamily A, polypeptide 22
92960	PEX11G	L	0.239854	peroxisomal biogenesis factor 11 gamma
220441	RNF152	H	0.240694	ring finger protein 152
92312	MEX3A	H	0.240934	mex-3 homolog A (C. elegans)
9572	NR1D1	L	0.241055	nuclear receptor subfamily 1, group D, member 1
10941	UGT2A1	L	0.241175	UDP glucuronosyltransferase 2 family, polypeptide A1, complex locus
23600	AMACR	L	0.241295	alpha-methylacyl-CoA racemase
10146	G3BP1	L	0.241777	GTPase activating protein (SH3 domain) binding protein 1
114793	FMNL2	H	0.242018	formin-like 2
51132	RLIM	H	0.242742	ring finger protein, LIM domain interacting
129531	MITD1	L	0.242984	MIT, microtubule interacting and transport, domain containing 1
9476	NAPSA	L	0.243468	napsin A aspartic peptidase
60559	SPCS3	H	0.243953	signal peptidase complex subunit 3 homolog (S. cerevisiae)
8110	DPF3	L	0.244196	D4, zinc and double PHD fingers, family 3
51201	ZDHHC2	H	0.24456	zinc finger, DHHC-type containing 2
10382	TUBB4	L	0.244682	tubulin, beta 4
55975	KLHL7	H	0.244925	kelch-like 7 (Drosophila)
25800	SLC39A6	H	0.245168	solute carrier family 39 (zinc transporter), member 6
26047	CNTNAP2	H	0.245412	contactin associated protein-like 2
23644	EDC4	H	0.246143	enhancer of mRNA decapping 4
51248	PDZD11	L	0.246387	PDZ domain containing 11
25822	DNAJB5	L	0.247366	DnaJ (Hsp40) homolog, subfamily B, member 5
80176	SPSB1	L	0.247611	splA/ryanodine receptor domain and SOCS box containing 1
27283	TINAG	H	0.247611	tubulointerstitial nephritis antigen
30845	EHD3	L	0.247979	EH-domain containing 3
4775	NFATC3	L	0.248838	nuclear factor of activated T-cells, cytoplasmic, calcineurin-dependent 3
91647	ATPAF2	L	0.248838	ATP synthase mitochondrial F1 complex assembly factor 2
23001	WDFY3	H	0.249577	WD repeat and FYVE domain containing 3
11085	ADAM30	H	0.249577	ADAM metallopeptidase domain 30
7681	MKRN3	L	0.25007	makorin ring finger protein 3
10170	DHRS9	H	0.250688	dehydrogenase/reductase (SDR family) member 9
339976	TRIML1	L	0.250812	tripartite motif family-like 1
27348	TOR1B	L	0.251678	torsin family 1, member B (torsin B)
79654	HECTD3	L	0.251802	HECT domain containing 3
9509	ADAMTS2	L	0.251926	ADAM metallopeptidase with thrombospondin type 1 motif, 2
5251	PHEX	L	0.252299	phosphate regulating endopeptidase homolog, X-linked
94103	ORMDL3	L	0.252547	ORM1-like 3 (S. cerevisiae)
22895	RPH3A	L	0.25292	rabphilin 3A homolog (mouse)
4126	MANBA	H	0.25292	mannosidase, beta A, lysosomal
54461	FBXW5	L	0.253469	F-box and WD repeat domain containing 5
140032	RPS4Y2	L	0.253792	ribosomal protein S4, Y-linked 2
57337	SENP7	H	0.255166	SUMO1/sentrin specific peptidase 7
112770	C1orf85	L	0.255166	chromosome 1 open reading frame 85
79754	ASB13	L	0.255541	ankyrin repeat and SOCS box containing 13
146845	WDR16	L	0.255792	WD repeat domain 16
29974	A1CF	L	0.256168	APOBEC1 complementation factor
112970	KTI12	L	0.257048	KTI12 homolog, chromatin associated (S. cerevisiae)
5023	P2RX1	L	0.257174	purinergic receptor P2X, ligand-gated ion channel, 1
84993	UBL7	L	0.257174	ubiquitin-like 7 (bone marrow stromal cell-derived)
158062	LCN6	L	0.2573	lipocalin 6
23317	DNAJC13	H	0.257425	DnaJ (Hsp40) homolog, subfamily C, member 13
92799	SHKBP1	L	0.257929	SH3KBP1 binding protein 1
79446	WDR25	L	0.257929	WD repeat domain 25
23161	SNX13	H	0.258182	sorting nexin 13
10124	ARL4A	H	0.258308	ADP-ribosylation factor-like 4A
11276	SYNRG	H	0.258687	synergin, gamma
340359	KLHL38	L	0.259066	kelch-like 38 (Drosophila)
157753	TMEM74	L	0.259572	transmembrane protein 74
81603	TRIM8	L	0.260079	tripartite motif containing 8
726	CAPN5	L	0.260333	calpain 5
1519	CTSO	H	0.261095	cathepsin O
130888	FBXO36	L	0.261859	F-box protein 36
51729	WBP11	H	0.262369	WW domain binding protein 11
56648	EIF5A2	L	0.26288	eukaryotic translation initiation factor 5A2
84186	ZCCHC7	H	0.263135	zinc finger, CCHC domain containing 7
22888	UBOX5	L	0.263263	U-box domain containing 5
51130	ASB3	H	0.263903	ankyrin repeat and SOCS box containing 3
22862	FNDC3A	H	0.26418	fibronectin type III domain containing 3A
10632	ATP5L	H	0.264288	ATP synthase, H+ transporting, mitochondrial Fo complex, subunit G
114880	OSBPL6	H	0.264544	oxysterol binding protein-like 6
127829	ARL8A	H	0.266216	ADP-ribosylation factor-like 8A
116496	FAM129A	H	0.266345	family with sequence similarity 129, member A
54941	RNF125	H	0.266345	ring finger protein 125
25827	FBXL2	L	0.267895	F-box and leucine-rich repeat protein 2
51542	VPS54	H	0.268024	vacuolar protein sorting 54 homolog (S. cerevisiae)
79803	HPS6	L	0.268802	Hermansky-Pudlak syndrome 6
23175	LPIN1	L	0.269062	lipin 1
93611	FBXO44	L	0.269062	F-box protein 44
1486	CTBS	H	0.269321	chitobiase, di-N-acetyl-
81894	SLC25A28	L	0.269841	solute carrier family 25, member 28
3267	AGFG1	H	0.270232	ArfGAP with FG repeats 1
4234	METTL1	H	0.271014	methyltransferase like 1
54978	C2orf18	L	0.271667	chromosome 2 open reading frame 18
150353	DNAJB7	H	0.271797	DnaJ (Hsp40) homolog, subfamily B, member 7
6048	RNF5	H	0.271928	ring finger protein 5
23007	PLCH1	H	0.272059	phospholipase C, eta 1
27253	PCDH17	H	0.27219	protocadherin 17
55008	HERC6	L	0.272451	hect domain and RLD 6
10548	TM9SF1	L	0.274026	transmembrane 9 superfamily member 1
4689	NCF4	L	0.274157	neutrophil cytosolic factor 4, 40kDa
7538	ZFP36	L	0.274157	zinc finger protein 36, C3H type, homolog (mouse)
148811	PM20D1	H	0.274552	peptidase M20 domain containing 1
192111	PGAM5	L	0.275738	phosphoglycerate mutase family member 5
10557	RPP38	L	0.275738	ribonuclease P/MRP 38kDa subunit
51645	PPIL1	L	0.276135	peptidylprolyl isomerase (cyclophilin)-like 1
9666	DZIP3	H	0.276664	DAZ interacting protein 3, zinc finger
10728	PTGES3	L	0.277193	prostaglandin E synthase 3 (cytosolic)
4651	MYO10	L	0.277326	myosin X
117166	WFIKKN1	L	0.277591	WAP, follistatin/kazal, immunoglobulin, kunitz and netrin domain containing 1
6449	SGTA	L	0.277724	small glutamine-rich tetratricopeptide repeat (TPR)-containing, alpha
79643	CHMP6	L	0.277989	chromatin modifying protein 6
8315	BRAP	H	0.278919	BRCA1 associated protein
10471	PFDN6	L	0.279852	prefoldin subunit 6
23301	EHBP1	L	0.279852	EH domain binding protein 1
57520	HECW2	H	0.280119	HECT, C2 and WW domain containing E3 ubiquitin protein ligase 2
653505	PPIAL4B	H	0.280653	peptidylprolyl isomerase A (cyclophilin A)-like 4B
338557	O3FAR1	L	0.28092	omega-3 fatty acid receptor 1
6734	SRPR	L	0.281029	signal recognition particle receptor (docking protein)
5082	PDCL	L	0.281991	phosducin-like
81631	MAP1LC3B	H	0.282259	microtubule-associated protein 1 light chain 3 beta
30818	KCNIP3	L	0.282393	Kv channel interacting protein 3, calsenilin
115825	WDFY2	H	0.282528	WD repeat and FYVE domain containing 2
5193	PEX12	L	0.283065	peroxisomal biogenesis factor 12
27246	RNF115	L	0.283065	ring finger protein 115
57528	KCTD16	L	0.283199	potassium channel tetramerisation domain containing 16
4332	MNDA	H	0.283872	myeloid cell nuclear differentiation antigen
283927	NUDT7	H	0.284141	nudix (nucleoside diphosphate linked moiety X)-type motif 7
404636	FAM45A	H	0.284182	family with sequence similarity 45, member A
30968	STOML2	L	0.284276	stomatin (EPB72)-like 2
23059	CLUAP1	H	0.284411	clusterin associated protein 1
83943	IMMP2L	L	0.285761	IMP2 inner mitochondrial membrane peptidase-like (S. cerevisiae)
8269	TMEM187	L	0.286303	transmembrane protein 187
10317	B3GALT5	H	0.286574	UDP-Gal:betaGlcNAc beta 1,3-galactosyltransferase, polypeptide 5
317772	HIST2H2AB	L	0.286574	histone cluster 2, H2ab
4137	MAPT	L	0.286845	microtubule-associated protein tau
127733	UBXN10	L	0.28698	UBX domain protein 10
10652	YKT6	H	0.287388	YKT6 v-SNARE homolog (S. cerevisiae)
9491	PSMF1	H	0.287659	proteasome (prosome, macropain) inhibitor subunit 1 (PI31)
56675	NRIP3	L	0.287659	nuclear receptor interacting protein 3
9601	PDIA4	H	0.287795	protein disulfide isomerase family A, member 4
57559	STAMBPL1	H	0.287931	STAM binding protein-like 1
161582	DYX1C1	L	0.288203	dyslexia susceptibility 1 candidate 1
162333	MARCH10	L	0.288203	membrane-associated ring finger (C3HC4) 10
245973	ATP6V1C2	H	0.288475	ATPase, H+ transporting, lysosomal 42kDa, V1 subunit C2
967	CD63	L	0.28902	CD63 molecule
10404	PGCP	H	0.290385	plasma glutamate carboxypeptidase
4760	NEUROD1	L	0.291755	neurogenic differentiation 1
431705	ASTL	L	0.293128	astacin-like metallo-endopeptidase (M12 family)
23020	SNRNP200	L	0.295059	small nuclear ribonucleoprotein 200kDa (U5)
5698	PSMB9	L	0.295889	proteasome (prosome, macropain) subunit, beta type, 9 (large multifunctional peptidase 2)
4648	MYO7B	L	0.297137	myosin VIIB
9805	SCRN1	H	0.297415	secernin 1
3297	HSF1	L	0.297971	heat shock transcription factor 1
3073	HEXA	L	0.29811	hexosaminidase A (alpha polypeptide)
221662	RBM24	H	0.29811	RNA binding motif protein 24
6903	TBCC	H	0.298388	tubulin folding cofactor C
258010	SVIP	L	0.298667	small VCP/p97-interacting protein
55238	SLC38A7	L	0.299225	solute carrier family 38, member 7
119180	LYZL2	L	0.299225	lysozyme-like 2
2134	EXTL1	L	0.299364	exostoses (multiple)-like 1
10136	CELA3A	L	0.299473	chymotrypsin-like elastase family, member 3A
10682	EBP	L	0.299923	emopamil binding protein (sterol isomerase)
57161	PELI2	H	0.300622	pellino homolog 2 (Drosophila)
53840	TRIM34	H	0.302593	tripartite motif containing 34
445372	TRIM6-TRIM34	L	0.303007	TRIM6-TRIM34 readthrough
7189	TRAF6	L	0.30357	TNF receptor-associated factor 6
392188	USP17L8	L	0.303888	ubiquitin specific peptidase 17-like 8
89890	KBTBD6	H	0.304698	kelch repeat and BTB (POZ) domain containing 6
284654	RSPO1	H	0.30484	R-spondin homolog (Xenopus laevis)
149603	RNF187	L	0.305264	ring finger protein 187
151230	KLHL23	H	0.305761	kelch-like 23 (Drosophila)
169166	SNX31	H	0.306679	sorting nexin 31
51030	FAM18B1	H	0.306821	family with sequence similarity 18, member B1
54468	MIOS	L	0.307105	missing oocyte, meiosis regulator, homolog (Drosophila)
29951	PDZRN4	L	0.307673	PDZ domain containing ring finger 4
9924	PAN2	L	0.307957	PAN2 poly(A) specific ribonuclease subunit homolog (S. cerevisiae)
25895	METTL21B	L	0.307957	methyltransferase like 21B
136242	PRSS37	H	0.307957	protease, serine, 37
25818	KLK5	L	0.3081	kallikrein-related peptidase 5
387522	TMEM189-UBE2V1	L	0.308954	TMEM189-UBE2V1 readthrough
5913	RAPSN	L	0.309096	receptor-associated protein of the synapse
221914	GPC2	L	0.309667	glypican 2
51633	OTUD6B	L	0.310524	OTU domain containing 6B
84280	BTBD10	H	0.310667	BTB (POZ) domain containing 10
5412	UBL3	H	0.311526	ubiquitin-like 3
2288	FKBP4	L	0.312674	FK506 binding protein 4, 59kDa
10677	AVIL	H	0.313105	advillin
57169	ZNFX1	L	0.313536	zinc finger, NFX1-type containing 1
1175	AP2S1	H	0.31368	adaptor-related protein complex 2, sigma 1 subunit
2963	GTF2F2	H	0.313968	general transcription factor IIF, polypeptide 2, 30kDa
10057	ABCC5	H	0.314545	ATP-binding cassette, sub-family C (CFTR/MRP), member 5
26515	FXC1	H	0.314833	fracture callus 1 homolog (rat)
26270	FBXO6	L	0.315103	F-box protein 6
149041	RC3H1	L	0.315266	ring finger and CCCH-type domains 1
143879	KBTBD3	H	0.3157	kelch repeat and BTB (POZ) domain containing 3
1861	TOR1A	L	0.3157	torsin family 1, member A (torsin A)
10049	DNAJB6	L	0.3157	DnaJ (Hsp40) homolog, subfamily B, member 6
2171	FABP5	H	0.315989	fatty acid binding protein 5 (psoriasis-associated)
1290	COL5A2	H	0.317727	collagen, type V, alpha 2
2168	FABP1	L	0.317873	fatty acid binding protein 1, liver
9866	TRIM66	H	0.318163	tripartite motif containing 66
154791	C7orf55	H	0.318599	chromosome 7 open reading frame 55
11005	SPINK5	H	0.31889	serine peptidase inhibitor, Kazal type 5
9526	MPDU1	L	0.319054	mannose-P-dolichol utilization defect 1
3451	IFNA17	L	0.319992	interferon, alpha 17
164118	TTC24	L	0.320785	tetratricopeptide repeat domain 24
881	CCIN	H	0.320785	calicin
140691	TRIM69	H	0.321662	tripartite motif containing 69
10273	STUB1	L	0.322102	STIP1 homology and U-box containing protein 1, E3 ubiquitin protein ligase
1777	DNASE2	L	0.322102	deoxyribonuclease II, lysosomal
57093	TRIM49	H	0.322248	tripartite motif containing 49
27314	RAB30	L	0.322395	RAB30, member RAS oncogene family
200185	KRTCAP2	L	0.322688	keratinocyte associated protein 2
162	AP1B1	L	0.322688	adaptor-related protein complex 1, beta 1 subunit
10330	CNPY2	L	0.322688	canopy 2 homolog (zebrafish)
386618	KCTD4	H	0.322981	potassium channel tetramerisation domain containing 4
51200	CPA4	L	0.323275	carboxypeptidase A4
10475	TRIM38	H	0.323421	tripartite motif containing 38
10869	USP19	L	0.323421	ubiquitin specific peptidase 19
1379	CR1L	H	0.323715	complement component (3b/4b) receptor 1-like
10814	CPLX2	H	0.323862	complexin 2
26135	SERBP1	L	0.323862	SERPINE1 mRNA binding protein 1
26249	KLHL3	H	0.324156	kelch-like 3 (Drosophila)
8239	USP9X	H	0.324745	ubiquitin specific peptidase 9, X-linked
114881	OSBPL7	L	0.325334	oxysterol binding protein-like 7
9525	VPS4B	L	0.325924	vacuolar protein sorting 4 homolog B (S. cerevisiae)
389812	LCN15	L	0.326072	lipocalin 15
79845	RNF122	H	0.326515	ring finger protein 122
134429	STARD4	H	0.326958	StAR-related lipid transfer (START) domain containing 4
127845	GOLT1A	H	0.327106	golgi transport 1A
6015	RING1	L	0.327698	ring finger protein 1
84909	C9orf3	H	0.328143	chromosome 9 open reading frame 3
10917	BTNL3	H	0.328885	butyrophilin-like 3
2802	GOLGA3	L	0.329182	golgin A3
25841	ABTB2	L	0.329182	ankyrin repeat and BTB (POZ) domain containing 2
7280	TUBB2A	H	0.329766	tubulin, beta 2A
8266	UBL4A	L	0.330222	ubiquitin-like 4A
11160	ERLIN2	H	0.330371	ER lipid raft associated 2
8969	HIST1H2AG	L	0.33052	histone cluster 1, H2ag
3052	HCCS	L	0.33052	holocytochrome c synthase
23710	GABARAPL1	H	0.330686	GABA(A) receptor-associated protein like 1
51057	WDPCP	L	0.330818	WD repeat containing planar cell polarity effector
25940	FAM98A	L	0.331265	family with sequence similarity 98, member A
6746	SSR2	H	0.331564	signal sequence receptor, beta (translocon-associated protein beta)
22796	COG2	L	0.331713	component of oligomeric golgi complex 2
158835	AWAT2	L	0.331862	acyl-CoA wax alcohol acyltransferase 2
28952	CCDC22	L	0.332311	coiled-coil domain containing 22
29058	C20orf30	L	0.332311	chromosome 20 open reading frame 30
378108	TRIM74	L	0.332506	tripartite motif containing 74
285848	PNPLA1	L	0.333058	patatin-like phospholipase domain containing 1
254240	BPIL2	H	0.333508	bactericidal/permeability-increasing protein-like 2
283514	SIAH3	H	0.334557	seven in absentia homolog 3 (Drosophila)
5716	PSMD10	L	0.334858	proteasome (prosome, macropain) 26S subunit, non-ATPase, 10
11043	MID2	H	0.335158	midline 2
3792	KEL	L	0.335459	Kell blood group, metallo-endopeptidase
5037	PEBP1	L	0.335459	phosphatidylethanolamine binding protein 1
285381	DPH3	H	0.335759	DPH3, KTI11 homolog (S. cerevisiae)
7335	UBE2V1	H	0.335759	ubiquitin-conjugating enzyme E2 variant 1
201254	STRA13	L	0.335876	stimulated by retinoic acid 13 homolog (mouse)
7332	UBE2L3	L	0.336211	ubiquitin-conjugating enzyme E2L 3
131870	NUDT16	H	0.336362	nudix (nucleoside diphosphate linked moiety X)-type motif 16
285231	FBXW12	L	0.336663	F-box and WD repeat domain containing 12
1201	CLN3	L	0.337115	ceroid-lipofuscinosis, neuronal 3
3037	HAS2	L	0.337719	hyaluronan synthase 2
84767	SPRYD5	H	0.33787	SPRY domain containing 5
130872	AHSA2	H	0.338777	AHA1, activator of heat shock 90kDa protein ATPase homolog 2 (yeast)
146310	RNF151	L	0.339686	ring finger protein 151
192683	SCAMP5	L	0.339838	secretory carrier membrane protein 5
91445	RNF185	H	0.341356	ring finger protein 185
84141	FAM176A	L	0.341812	family with sequence similarity 176, member A
64844	MARCH7	H	0.342117	membrane-associated ring finger (C3HC4) 7
64841	GNPNAT1	H	0.342574	glucosamine-phosphate N-acetyltransferase 1
11337	GABARAP	L	0.342726	GABA(A) receptor-associated protein
78992	YIPF2	L	0.344406	Yip1 domain family, member 2
124930	ANKRD13B	L	0.344865	ankyrin repeat domain 13B
2803	GOLGA4	L	0.345171	golgin A4
155185	AMZ1	L	0.345477	archaelysin family metallopeptidase 1
8756	ADAM7	H	0.346397	ADAM metallopeptidase domain 7
5711	PSMD5	H	0.347012	proteasome (prosome, macropain) 26S subunit, non-ATPase, 5
84871	AGBL4	L	0.347319	ATP/GTP binding protein-like 4
144193	AMDHD1	H	0.347627	amidohydrolase domain containing 1
58158	NEUROD4	H	0.347934	neurogenic differentiation 4
124872	B4GALNT2	L	0.348551	beta-1,4-N-acetyl-galactosaminyl transferase 2
23398	PPWD1	L	0.348785	peptidylprolyl isomerase domain and WD repeat containing 1
10324	KBTBD10	H	0.349167	kelch repeat and BTB (POZ) domain containing 10
1418	CRYGA	L	0.349167	crystallin, gamma A
118491	TTC18	L	0.350094	tetratricopeptide repeat domain 18
84971	ATG4D	L	0.350712	ATG4 autophagy related 4 homolog D (S. cerevisiae)
432	ASGR1	L	0.350712	asialoglycoprotein receptor 1
80023	NRSN2	L	0.351022	neurensin 2
114818	KLHL29	L	0.351331	kelch-like 29 (Drosophila)
29899	GPSM2	H	0.351486	G-protein signaling modulator 2
53347	UBASH3A	H	0.351486	ubiquitin associated and SH3 domain containing A
27243	CHMP2A	H	0.351796	chromatin modifying protein 2A
93550	ANUBL1	H	0.352261	AN1, ubiquitin-like, homolog (Xenopus laevis)
1733	DIO1	H	0.352572	deiodinase, iodothyronine, type I
346	APOC4	L	0.352727	apolipoprotein C-IV
80853	JHDM1D	L	0.353193	jumonji C domain containing histone demethylase 1 homolog D (S. cerevisiae)
4688	NCF2	L	0.353193	neutrophil cytosolic factor 2
64854	USP46	H	0.353193	ubiquitin specific peptidase 46
283254	HARBI1	L	0.353348	harbinger transposase derived 1
23321	TRIM2	H	0.353504	tripartite motif containing 2
425054	VCX3B	H	0.353528	variable charge, X-linked 3B
57630	SH3RF1	H	0.353815	SH3 domain containing ring finger 1
64320	RNF25	L	0.353815	ring finger protein 25
3437	IFIT3	L	0.354126	interferon-induced protein with tetratricopeptide repeats 3
129401	NUP35	H	0.354282	nucleoporin 35kDa
427	ASAH1	H	0.354437	N-acylsphingosine amidohydrolase (acid ceramidase) 1
130535	KCTD18	L	0.355373	potassium channel tetramerisation domain containing 18
55244	SLC47A1	L	0.356309	solute carrier family 47, member 1
401541	CENPP	L	0.356622	centromere protein P
440738	MAP1LC3C	H	0.356935	microtubule-associated protein 1 light chain 3 gamma
123	PLIN2	H	0.357561	perilipin 2
3920	LAMP2	H	0.357874	lysosomal-associated membrane protein 2
54813	KLHL28	L	0.358188	kelch-like 28 (Drosophila)
10043	TOM1	L	0.358398	target of myb1 (chicken)
22824	HSPA4L	L	0.359443	heat shock 70kDa protein 4-like
203859	ANO5	H	0.359443	anoctamin 5
321	APBA2	L	0.359443	amyloid beta (A4) precursor protein-binding, family A, member 2
115209	OMA1	L	0.360544	OMA1 homolog, zinc metallopeptidase (S. cerevisiae)
5664	PSEN2	H	0.361647	presenilin 2 (Alzheimer disease 4)
123228	SENP8	H	0.361647	SUMO/sentrin specific peptidase family member 8
57602	USP36	L	0.362594	ubiquitin specific peptidase 36
3329	HSPD1	L	0.363068	heat shock 60kDa protein 1 (chaperonin)
285973	ATG9B	L	0.363385	ATG9 autophagy related 9 homolog B (S. cerevisiae)
442038	SULT1C3	H	0.363543	sulfotransferase family, cytosolic, 1C, member 3
29801	ZDHHC8	L	0.363619	zinc finger, DHHC-type containing 8
1060	CENPC1	H	0.364335	centromere protein C 1
84888	SPPL2A	H	0.364335	signal peptide peptidase-like 2A
51317	PHF21A	L	0.364969	PHD finger protein 21A
130617	ZFAND2B	L	0.365445	zinc finger, AN1-type domain 2B
130507	UBR3	L	0.365445	ubiquitin protein ligase E3 component n-recognin 3 (putative)
10938	EHD1	L	0.365604	EH-domain containing 1
92691	TMEM169	L	0.365762	transmembrane protein 169
90637	ZFAND2A	L	0.366239	zinc finger, AN1-type domain 2A
54858	PGPEP1	H	0.366398	pyroglutamyl-peptidase I
2052	EPHX1	L	0.367194	epoxide hydrolase 1, microsomal (xenobiotic)
494470	RNF165	L	0.367831	ring finger protein 165
2395	FXN	H	0.36815	frataxin
27072	VPS41	L	0.36815	vacuolar protein sorting 41 homolog (S. cerevisiae)
65082	VPS33A	H	0.368629	vacuolar protein sorting 33 homolog A (S. cerevisiae)
10699	CORIN	H	0.368629	corin, serine peptidase
7187	TRAF3	H	0.368788	TNF receptor-associated factor 3
221613	HIST1H2AA	L	0.369587	histone cluster 1, H2aa
22841	RAB11FIP2	H	0.370547	RAB11 family interacting protein 2 (class I)
56606	SLC2A9	L	0.371669	solute carrier family 2 (facilitated glucose transporter), member 9
4256	MGP	H	0.37199	matrix Gla protein
57222	ERGIC1	L	0.372311	endoplasmic reticulum-golgi intermediate compartment (ERGIC) 1
533	ATP6V0B	L	0.373597	ATPase, H+ transporting, lysosomal 21kDa, V0 subunit b
1605	DAG1	L	0.373758	dystroglycan 1 (dystrophin-associated glycoprotein 1)
3158	HMGCS2	L	0.373758	3-hydroxy-3-methylglutaryl-CoA synthase 2 (mitochondrial)
10940	POP1	H	0.373758	processing of precursor 1, ribonuclease P/MRP subunit (S. cerevisiae)
10410	IFITM3	H	0.374242	interferon induced transmembrane protein 3 (1-8U)
6902	TBCA	H	0.374242	tubulin folding cofactor A
377	ARF3	H	0.374403	ADP-ribosylation factor 3
7703	PCGF2	L	0.374564	polycomb group ring finger 2
10087	COL4A3BP	H	0.37537	collagen, type IV, alpha 3 (Goodpasture antigen) binding protein
2169	FABP2	H	0.37537	fatty acid binding protein 2, intestinal
25782	RAB3GAP2	H	0.376016	RAB3 GTPase activating protein subunit 2 (non-catalytic)
10123	ARL4C	H	0.37634	ADP-ribosylation factor-like 4C
26085	KLK13	L	0.37634	kallikrein-related peptidase 13
5051	PAFAH2	H	0.37634	platelet-activating factor acetylhydrolase 2, 40kDa
143282	FGFBP3	L	0.376501	fibroblast growth factor binding protein 3
83464	APH1B	H	0.376825	anterior pharynx defective 1 homolog B (C. elegans)
9923	ZBTB40	L	0.377311	zinc finger and BTB domain containing 40
254531	LPCAT4	L	0.377959	lysophosphatidylcholine acyltransferase 4
93487	MAPK1IP1L	H	0.377959	mitogen-activated protein kinase 1 interacting protein 1-like
51569	UFM1	H	0.378283	ubiquitin-fold modifier 1
3848	KRT1	L	0.379095	keratin 1
55617	TASP1	L	0.379095	taspase, threonine aspartase, 1
58477	SRPRB	L	0.379257	signal recognition particle receptor, B subunit
4850	CNOT4	L	0.380002	CCR4-NOT transcription complex, subunit 4
140767	NRSN1	L	0.380168	neurensin 1
8237	USP11	L	0.380558	ubiquitin specific peptidase 11
23545	ATP6V0A2	H	0.380558	ATPase, H+ transporting, lysosomal V0 subunit a2
3375	IAPP	H	0.380558	islet amyloid polypeptide
219743	TYSND1	L	0.381332	trypsin domain containing 1
56916	SMARCAD1	L	0.382515	SWI/SNF-related, matrix-associated actin-dependent regulator of chromatin, subfamily a, containing DEAD/H box 1
9871	SEC24D	H	0.382841	SEC24 family, member D (S. cerevisiae)
4065	LY75	H	0.383005	lymphocyte antigen 75
54187	NANS	L	0.383168	N-acetylneuraminic acid synthase
23127	GLT25D2	H	0.383332	glycosyltransferase 25 domain containing 2
136647	C7orf11	H	0.383659	chromosome 7 open reading frame 11
10580	SORBS1	H	0.383822	sorbin and SH3 domain containing 1
8139	GAN	L	0.38415	gigaxonin
252839	TMEM9	H	0.385133	transmembrane protein 9
80267	EDEM3	H	0.385461	ER degradation enhancer, mannosidase alpha-like 3
5303	PIN4	L	0.385625	protein (peptidylprolyl cis/trans isomerase) NIMA-interacting, 4 (parvulin)
254122	SNX32	L	0.386775	sorting nexin 32
11101	ATE1	H	0.386939	arginyltransferase 1
7145	TNS1	L	0.387433	tensin 1
51110	LACTB2	L	0.387762	lactamase, beta 2
26520	TIMM9	L	0.387927	translocase of inner mitochondrial membrane 9 homolog (yeast)
131965	METTL6	H	0.388256	methyltransferase like 6
4076	CAPRIN1	H	0.388421	cell cycle associated protein 1
25816	TNFAIP8	H	0.389246	tumor necrosis factor, alpha-induced protein 8
84313	VPS25	L	0.390072	vacuolar protein sorting 25 homolog (S. cerevisiae)
56649	TMPRSS4	H	0.390237	transmembrane protease, serine 4
1943	EFNA2	L	0.390899	ephrin-A2
84676	TRIM63	L	0.391395	tripartite motif containing 63
8725	C19orf2	L	0.391892	chromosome 19 open reading frame 2
24140	FTSJ1	H	0.392058	FtsJ homolog 1 (E. coli)
23259	DDHD2	L	0.39239	DDHD domain containing 2
11086	ADAM29	H	0.392722	ADAM metallopeptidase domain 29
64924	SLC30A5	L	0.393053	solute carrier family 30 (zinc transporter), member 5
3064	HTT	H	0.393053	huntingtin
79634	SCRN3	H	0.393552	secernin 3
2998	GYS2	L	0.394217	glycogen synthase 2 (liver)
26276	VPS33B	H	0.394716	vacuolar protein sorting 33 homolog B (yeast)
27433	TOR2A	L	0.395049	torsin family 2, member A
55250	ELP2	H	0.395382	elongation protein 2 homolog (S. cerevisiae)
396	ARHGDIA	L	0.395469	Rho GDP dissociation inhibitor (GDI) alpha
54455	FBXO42	L	0.395549	F-box protein 42
117584	RFFL	H	0.396049	ring finger and FYVE-like domain containing 1
143425	SYT9	H	0.396383	synaptotagmin IX
51088	KLHL5	L	0.396717	kelch-like 5 (Drosophila)
2781	GNAZ	H	0.396884	guanine nucleotide binding protein (G protein), alpha z polypeptide
59349	KLHL12	H	0.397218	kelch-like 12 (Drosophila)
164045	HFM1	H	0.397685	HFM1, ATP-dependent DNA helicase homolog (S. cerevisiae)
51100	SH3GLB1	L	0.398556	SH3-domain GRB2-like endophilin B1
392636	AGMO	H	0.398723	alkylglycerol monooxygenase
374654	KIF7	L	0.399393	kinesin family member 7
10254	STAM2	L	0.399393	signal transducing adaptor molecule (SH3 domain and ITAM motif) 2
117289	TAGAP	L	0.399561	T-cell activation RhoGTPase activating protein
10394	PRG3	L	0.399729	proteoglycan 3
23762	OSBP2	L	0.399729	oxysterol binding protein 2
10329	TMEM5	H	0.399729	transmembrane protein 5
164022	PPIAL4A	H	0.4004	peptidylprolyl isomerase A (cyclophilin A)-like 4A
79922	MRM1	L	0.401072	mitochondrial rRNA methyltransferase 1 homolog (S. cerevisiae)
51617	HMP19	H	0.401913	HMP19 protein
51133	KCTD3	H	0.401913	potassium channel tetramerisation domain containing 3
10743	RAI1	L	0.401913	retinoic acid induced 1
64764	CREB3L2	L	0.402081	cAMP responsive element binding protein 3-like 2
4337	MOCS1	H	0.402586	molybdenum cofactor synthesis 1
79005	SCNM1	H	0.402755	sodium channel modifier 1
83548	COG3	L	0.402755	component of oligomeric golgi complex 3
89857	KLHL6	L	0.402755	kelch-like 6 (Drosophila)
257364	SNX33	L	0.40326	sorting nexin 33
9984	THOC1	L	0.403767	THO complex 1
57661	PHRF1	H	0.404104	PHD and ring finger domains 1
26091	HERC4	H	0.404104	hect domain and RLD 4
84759	PCGF1	L	0.404104	polycomb group ring finger 1
23358	USP24	L	0.404442	ubiquitin specific peptidase 24
64180	DPEP3	L	0.404949	dipeptidase 3
348487	FAM131C	L	0.405287	family with sequence similarity 131, member C
6810	STX4	L	0.405625	syntaxin 4
26133	TRPC4AP	L	0.406302	transient receptor potential cation channel, subfamily C, member 4 associated protein
53407	STX18	H	0.406641	syntaxin 18
64223	MLST8	L	0.409188	MTOR associated protein, LST8 homolog (S. cerevisiae)
65982	ZSCAN18	L	0.410039	zinc finger and SCAN domain containing 18
7780	SLC30A2	H	0.41038	solute carrier family 30 (zinc transporter), member 2
26269	FBXO8	H	0.411915	F-box protein 8
1182	CLCN3	L	0.413625	chloride channel 3
29929	ALG6	L	0.414138	asparagine-linked glycosylation 6, alpha-1,3-glucosyltransferase homolog (S. cerevisiae)
9920	KBTBD11	H	0.415339	kelch repeat and BTB (POZ) domain containing 11
80263	TRIM45	L	0.415854	tripartite motif containing 45
359710	C20orf185	L	0.416025	chromosome 20 open reading frame 185
1368	CPM	H	0.416197	carboxypeptidase M
3933	LCN1	L	0.416197	lipocalin 1 (tear prealbumin)
253558	LCLAT1	H	0.417745	lysocardiolipin acyltransferase 1
140735	DYNLL2	L	0.417917	dynein, light chain, LC8-type 2
65243	ZNF643	L	0.417917	zinc finger protein 643
57393	TMEM27	L	0.418951	transmembrane protein 27
6945	MLX	L	0.419371	MAX-like protein X
379	ARL4D	H	0.42016	ADP-ribosylation factor-like 4D
28959	TMEM176B	L	0.420506	transmembrane protein 176B
259230	SGMS1	L	0.420678	sphingomyelin synthase 1
7178	TPT1	H	0.421024	tumor protein, translationally-controlled 1
25844	YIPF3	L	0.421197	Yip1 domain family, member 3
23037	PDZD2	H	0.42137	PDZ domain containing 2
221656	KDM1B	L	0.42189	lysine (K)-specific demethylase 1B
148281	SYT6	H	0.42241	synaptotagmin VI
55016	MARCH1	H	0.423103	membrane-associated ring finger (C3HC4) 1
166378	SPATA5	L	0.42345	spermatogenesis associated 5
1756	DMD	H	0.423971	dystrophin
25963	TMEM87A	H	0.424319	transmembrane protein 87A
84749	USP30	H	0.424666	ubiquitin specific peptidase 30
206338	AQPEP	H	0.424666	laeverin
9622	KLK4	L	0.425188	kallikrein-related peptidase 4
2960	GTF2E1	H	0.42571	general transcription factor IIE, polypeptide 1, alpha 56kDa
81794	ADAMTS10	L	0.42571	ADAM metallopeptidase with thrombospondin type 1 motif, 10
283748	PLA2G4D	L	0.426058	phospholipase A2, group IVD (cytosolic)
7706	TRIM25	H	0.426407	tripartite motif containing 25
9374	PPT2	L	0.426755	palmitoyl-protein thioesterase 2
7411	VBP1	H	0.426755	von Hippel-Lindau binding protein 1
124817	CNTD1	H	0.42693	cyclin N-terminal domain containing 1
9129	PRPF3	H	0.427104	PRP3 pre-mRNA processing factor 3 homolog (S. cerevisiae)
92552	ATXN3L	H	0.427104	ataxin 3-like
26297	SERGEF	L	0.427977	secretion regulating guanine nucleotide exchange factor
10383	TUBB2C	L	0.428501	tubulin, beta 2C
60685	ZFAND3	H	0.429201	zinc finger, AN1-type domain 3
344838	PAQR9	L	0.429551	progestin and adipoQ receptor family member IX
389856	USP27X	L	0.430601	ubiquitin specific peptidase 27, X-linked
8343	HIST1H2BF	L	0.430601	histone cluster 1, H2bf
255626	HIST1H2BA	L	0.431303	histone cluster 1, H2ba
29028	ATAD2	L	0.431654	ATPase family, AAA domain containing 2
1582	CYP8B1	L	0.433411	cytochrome P450, family 8, subfamily B, polypeptide 1
344	APOC2	L	0.433587	apolipoprotein C-II
154214	RNF217	H	0.433939	ring finger protein 217
26985	AP3M1	H	0.434115	adaptor-related protein complex 3, mu 1 subunit
146547	PRSS36	L	0.434291	protease, serine, 36
89910	UBE3B	H	0.434467	ubiquitin protein ligase E3B
11237	RNF24	L	0.434467	ring finger protein 24
399687	MYO18A	L	0.435702	myosin XVIIIA
11202	KLK8	L	0.436231	kallikrein-related peptidase 8
7318	UBA7	L	0.437291	ubiquitin-like modifier activating enzyme 7
29091	STXBP6	L	0.438353	syntaxin binding protein 6 (amisyn)
51232	CRIM1	L	0.439239	cysteine rich transmembrane BMP regulator 1 (chordin-like)
8082	SSPN	H	0.439771	sarcospan (Kras oncogene-associated gene)
79596	RNF219	L	0.439949	ring finger protein 219
140462	ASB9	H	0.440481	ankyrin repeat and SOCS box containing 9
10438	C1D	L	0.441547	C1D nuclear receptor corepressor
37	ACADVL	L	0.441903	acyl-CoA dehydrogenase, very long chain
129807	NEU4	L	0.442259	sialidase 4
1770	DNAH9	L	0.442793	dynein, axonemal, heavy chain 9
2348	FOLR1	L	0.442793	folate receptor 1 (adult)
54814	QPCTL	L	0.443863	glutaminyl-peptide cyclotransferase-like
1434	CSE1L	H	0.444041	CSE1 chromosome segregation 1-like (yeast)
1464	CSPG4	L	0.444398	chondroitin sulfate proteoglycan 4
55697	VAC14	L	0.444755	Vac14 homolog (S. cerevisiae)
1369	CPN1	L	0.444755	carboxypeptidase N, polypeptide 1
1678	TIMM8A	L	0.445195	translocase of inner mitochondrial membrane 8 homolog A (yeast)
10890	RAB10	L	0.445648	RAB10, member RAS oncogene family
55748	CNDP2	L	0.446364	CNDP dipeptidase 2 (metallopeptidase M20 family)
11069	RAPGEF4	H	0.446543	Rap guanine nucleotide exchange factor (GEF) 4
84955	NUDCD1	L	0.446901	NudC domain containing 1
23609	MKRN2	L	0.447259	makorin ring finger protein 2
3818	KLKB1	L	0.449052	kallikrein B, plasma (Fletcher factor) 1
10565	ARFGEF1	L	0.449052	ADP-ribosylation factor guanine nucleotide-exchange factor 1(brefeldin A-inhibited)
23169	SLC35D1	L	0.449052	solute carrier family 35 (UDP-glucuronic acid/UDP-N-acetylgalactosamine dual transporter), member D1
9296	ATP6V1F	L	0.449232	ATPase, H+ transporting, lysosomal 14kDa, V1 subunit F
26035	GLCE	L	0.45013	glucuronic acid epimerase
81567	TXNDC5	H	0.45049	thioredoxin domain containing 5 (endoplasmic reticulum)
57017	COQ9	L	0.45085	coenzyme Q9 homolog (S. cerevisiae)
160418	TMTC3	L	0.45085	transmembrane and tetratricopeptide repeat containing 3
196403	DTX3	L	0.452471	deltex homolog 3 (Drosophila)
390231	TRIM77	H	0.453734	tripartite motif containing 77
54832	VPS13C	H	0.454554	vacuolar protein sorting 13 homolog C (S. cerevisiae)
56943	ENY2	L	0.454818	enhancer of yellow 2 homolog (Drosophila)
320	APBA1	L	0.45518	amyloid beta (A4) precursor protein-binding, family A, member 1
2804	GOLGB1	H	0.457536	golgin B1
2673	GFPT1	L	0.45808	glutamine--fructose-6-phosphate transaminase 1
196463	PLBD2	L	0.458443	phospholipase B domain containing 2
122809	SOCS4	H	0.459352	suppressor of cytokine signaling 4
27309	ZNF330	L	0.459352	zinc finger protein 330
4761	NEUROD2	L	0.459534	neurogenic differentiation 2
51463	GPR89B	L	0.460262	G protein-coupled receptor 89B
4780	NFE2L2	H	0.46172	nuclear factor (erythroid-derived 2)-like 2
6051	RNPEP	L	0.462267	arginyl aminopeptidase (aminopeptidase B)
22925	PLA2R1	H	0.463363	phospholipase A2 receptor 1, 180kDa
5052	PRDX1	L	0.463545	peroxiredoxin 1
51321	AMZ2	H	0.463728	archaelysin family metallopeptidase 2
23275	POFUT2	L	0.463911	protein O-fucosyltransferase 2
66005	CHID1	L	0.464643	chitinase domain containing 1
119016	AGAP4	L	0.465742	ArfGAP with GTPase domain, ankyrin repeat and PH domain 4
57685	CACHD1	L	0.465925	cache domain containing 1
9066	SYT7	H	0.466658	synaptotagmin VII
83892	KCTD10	H	0.467392	potassium channel tetramerisation domain containing 10
197	AHSG	H	0.46776	alpha-2-HS-glycoprotein
100131187	TSTD1	L	0.46776	thiosulfate sulfurtransferase (rhodanese)-like domain containing 1
10026	PIGK	L	0.468679	phosphatidylinositol glycan anchor biosynthesis, class K
2775	GNAO1	L	0.469415	guanine nucleotide binding protein (G protein), alpha activating activity polypeptide O
22948	CCT5	H	0.469967	chaperonin containing TCP1, subunit 5 (epsilon)
10134	BCAP31	L	0.47052	B-cell receptor-associated protein 31
7873	MANF	H	0.470888	mesencephalic astrocyte-derived neurotrophic factor
717	C2	H	0.470888	complement component 2
1510	CTSE	L	0.471626	cathepsin E
178	AGL	L	0.471995	amylo-alpha-1, 6-glucosidase, 4-alpha-glucanotransferase
26235	FBXL4	H	0.471995	F-box and leucine-rich repeat protein 4
491	ATP2B2	H	0.472549	ATPase, Ca++ transporting, plasma membrane 2
26872	STEAP1	L	0.472734	six transmembrane epithelial antigen of the prostate 1
27248	ERLEC1	H	0.472919	endoplasmic reticulum lectin 1
29761	USP25	L	0.473104	ubiquitin specific peptidase 25
9403	SEP15	H	0.473474	15 kDa selenoprotein
25893	TRIM58	L	0.474029	tripartite motif containing 58
1314	COPA	H	0.474399	coatomer protein complex, subunit alpha
6809	STX3	L	0.474584	syntaxin 3
55236	UBA6	H	0.474954	ubiquitin-like modifier activating enzyme 6
23504	RIMBP2	H	0.47514	RIMS binding protein 2
55187	VPS13D	H	0.475325	vacuolar protein sorting 13 homolog D (S. cerevisiae)
5988	RFPL1	L	0.476809	ret finger protein-like 1
170850	KCNG3	L	0.476809	potassium voltage-gated channel, subfamily G, member 3
7328	UBE2H	H	0.47718	ubiquitin-conjugating enzyme E2H (UBC8 homolog, yeast)
3652	IPP	L	0.477923	intracisternal A particle-promoted polypeptide
43849	KLK12	L	0.478109	kallikrein-related peptidase 12
94134	ARHGAP12	H	0.478109	Rho GTPase activating protein 12
134510	UBLCP1	L	0.479598	ubiquitin-like domain containing CTD phosphatase 1
8372	HYAL3	L	0.479784	hyaluronoglucosaminidase 3
7325	UBE2E2	L	0.479784	ubiquitin-conjugating enzyme E2E 2 (UBC4/5 homolog, yeast)
1809	DPYSL3	L	0.479784	dihydropyrimidinase-like 3
9921	RNF10	L	0.481089	ring finger protein 10
8820	HESX1	H	0.481649	HESX homeobox 1
9128	PRPF4	L	0.481836	PRP4 pre-mRNA processing factor 4 homolog (yeast)
2167	FABP4	H	0.482022	fatty acid binding protein 4, adipocyte
390637	C15orf58	L	0.482396	chromosome 15 open reading frame 58
246213	SLC17A8	H	0.482583	solute carrier family 17 (sodium-dependent inorganic phosphate cotransporter), member 8
257397	TAB3	L	0.48277	TGF-beta activated kinase 1/MAP3K7 binding protein 3
11059	WWP1	L	0.48277	WW domain containing E3 ubiquitin protein ligase 1
4240	MFGE8	L	0.48277	milk fat globule-EGF factor 8 protein
28973	MRPS18B	L	0.483892	mitochondrial ribosomal protein S18B
648	BMI1	L	0.484641	BMI1 polycomb ring finger oncogene
54555	DDX49	H	0.485203	DEAD (Asp-Glu-Ala-Asp) box polypeptide 49
11343	MGLL	L	0.48539	monoglyceride lipase
23276	KLHL18	L	0.485578	kelch-like 18 (Drosophila)
65009	NDRG4	H	0.485578	NDRG family member 4
10313	RTN3	L	0.485953	reticulon 3
221421	RSPH9	L	0.486141	radial spoke head 9 homolog (Chlamydomonas)
1106	CHD2	H	0.486328	chromodomain helicase DNA binding protein 2
10478	SLC25A17	L	0.486891	solute carrier family 25 (mitochondrial carrier; peroxisomal membrane protein, 34kDa), member 17
284325	C19orf54	L	0.487643	chromosome 19 open reading frame 54
158248	TTC16	H	0.488207	tetratricopeptide repeat domain 16
339906	PRSS42	L	0.488395	protease, serine, 42
23344	ESYT1	H	0.488395	extended synaptotagmin-like protein 1
56163	RNF17	H	0.488771	ring finger protein 17
121278	TPH2	H	0.488959	tryptophan hydroxylase 2
200728	TMEM17	L	0.489524	transmembrane protein 17
84735	CNDP1	H	0.489901	carnosine dipeptidase 1 (metallopeptidase M20 family)
81550	TDRD3	L	0.490655	tudor domain containing 3
26160	IFT172	L	0.490655	intraflagellar transport 172 homolog (Chlamydomonas)
51185	CRBN	H	0.491032	cereblon
8560	DEGS1	H	0.491787	degenerative spermatocyte homolog 1, lipid desaturase (Drosophila)
26224	FBXL3	L	0.492164	F-box and leucine-rich repeat protein 3
23109	DDN	H	0.49292	dendrin
116362	RBP7	L	0.493676	retinol binding protein 7, cellular
54492	NEURL1B	L	0.494055	neuralized homolog 1B (Drosophila)
55972	SLC25A40	L	0.494244	solute carrier family 25, member 40
7639	ZNF85	H	0.495191	zinc finger protein 85
23148	NACAD	L	0.49557	NAC alpha domain containing
623	BDKRB1	L	0.496329	bradykinin receptor B1
57626	KLHL1	L	0.497088	kelch-like 1 (Drosophila)
282809	POC1B	H	0.497468	POC1 centriolar protein homolog B (Chlamydomonas)
1746	DLX2	L	0.497468	distal-less homeobox 2
23166	STAB1	L	0.498228	stabilin 1
85363	TRIM5	L	0.498608	tripartite motif containing 5
55152	DALRD3	L	0.498989	DALR anticodon binding domain containing 3
151112	ZSWIM2	H	0.498989	zinc finger, SWIM-type containing 2
311	ANXA11	L	0.499179	annexin A11
6819	SULT1C2	L	0.499369	sulfotransferase family, cytosolic, 1C, member 2
3445	IFNA8	L	0.499469	interferon, alpha 8
1618	DAZL	H	0.500131	deleted in azoospermia-like
51619	UBE2D4	H	0.502038	ubiquitin-conjugating enzyme E2D 4 (putative)
26521	TIMM8B	L	0.502038	translocase of inner mitochondrial membrane 8 homolog B (yeast)
26268	FBXO9	H	0.503566	F-box protein 9
835	CASP2	L	0.504331	caspase 2, apoptosis-related cysteine peptidase
388610	TRNP1	L	0.504522	TMF1-regulated nuclear protein 1
164	AP1G1	H	0.506054	adaptor-related protein complex 1, gamma 1 subunit
23345	SYNE1	L	0.506054	spectrin repeat containing, nuclear envelope 1
25972	UNC50	H	0.506821	unc-50 homolog (C. elegans)
213	ALB	L	0.507397	albumin
26007	DAK	L	0.507781	dihydroxyacetone kinase 2 homolog (S. cerevisiae)
5715	PSMD9	L	0.507973	proteasome (prosome, macropain) 26S subunit, non-ATPase, 9
203100	HTRA4	H	0.508165	HtrA serine peptidase 4
23080	AVL9	H	0.50855	AVL9 homolog (S. cerevisiase)
51083	GAL	L	0.50855	galanin prepropeptide
26234	FBXL5	L	0.509319	F-box and leucine-rich repeat protein 5
55159	RFWD3	H	0.509703	ring finger and WD repeat domain 3
51283	BFAR	H	0.510088	bifunctional apoptosis regulator
25870	SUMF2	L	0.511436	sulfatase modifying factor 2
9512	PMPCB	L	0.511822	peptidase (mitochondrial processing) beta
169026	SLC30A8	L	0.512401	solute carrier family 30 (zinc transporter), member 8
79923	NANOG	L	0.512787	Nanog homeobox
1937	EEF1G	H	0.513752	eukaryotic translation elongation factor 1 gamma
84000	TMPRSS13	L	0.514332	transmembrane protease, serine 13
440400	RNASEK	H	0.514912	ribonuclease, RNase K
972	CD74	L	0.515105	CD74 molecule, major histocompatibility complex, class II invariant chain
4762	NEUROG1	L	0.515686	neurogenin 1
338323	NLRP14	H	0.516267	NLR family, pyrin domain containing 14
8745	ADAM23	H	0.516267	ADAM metallopeptidase domain 23
283518	KCNRG	L	0.517042	potassium channel regulator
84078	KBTBD7	H	0.517236	kelch repeat and BTB (POZ) domain containing 7
9358	ITGBL1	H	0.517624	integrin, beta-like 1 (with EGF-like repeat domains)
84750	FUT10	H	0.518982	fucosyltransferase 10 (alpha (1,3) fucosyltransferase)
9886	RHOBTB1	L	0.518982	Rho-related BTB domain containing 1
6767	ST13	L	0.519176	suppression of tumorigenicity 13 (colon carcinoma) (Hsp70 interacting protein)
23527	ACAP2	L	0.519371	ArfGAP with coiled-coil, ankyrin repeat and PH domains 2
146754	DNAH2	L	0.519371	dynein, axonemal, heavy chain 2
28966	SNX24	H	0.520343	sorting nexin 24
26260	FBXO25	H	0.521121	F-box protein 25
2767	GNA11	L	0.523876	guanine nucleotide binding protein (G protein), alpha 11 (Gq class)
8720	MBTPS1	L	0.524044	membrane-bound transcription factor peptidase, site 1
91419	XRCC6BP1	L	0.525803	XRCC6 binding protein 1
90780	PYGO2	L	0.526389	pygopus homolog 2 (Drosophila)
11080	DNAJB4	H	0.526781	DnaJ (Hsp40) homolog, subfamily B, member 4
2267	FGL1	L	0.527172	fibrinogen-like 1
253314	EIF4E1B	L	0.527564	eukaryotic translation initiation factor 4E family member 1B
84836	ABHD14B	H	0.527956	abhydrolase domain containing 14B
80279	CDK5RAP3	H	0.527956	CDK5 regulatory subunit associated protein 3
83932	C1orf124	L	0.528544	chromosome 1 open reading frame 124
342931	RFPL4A	H	0.529132	ret finger protein-like 4A
868	CBLB	L	0.529524	Cas-Br-M (murine) ecotropic retroviral transforming sequence b
1058	CENPA	H	0.529721	centromere protein A
51258	MRPL51	L	0.530702	mitochondrial ribosomal protein L51
388591	RNF207	L	0.531488	ring finger protein 207
115827	RAB3C	L	0.531685	RAB3C, member RAS oncogene family
131377	KBTBD5	L	0.532078	kelch repeat and BTB (POZ) domain containing 5
11331	PHB2	L	0.532078	prohibitin 2
25924	MYRIP	H	0.532275	myosin VIIA and Rab interacting protein
11264	PXMP4	L	0.532669	peroxisomal membrane protein 4, 24kDa
10425	ARIH2	H	0.533456	ariadne homolog 2 (Drosophila)
3931	LCAT	L	0.533456	lecithin-cholesterol acyltransferase
64839	FBXL17	H	0.533456	F-box and leucine-rich repeat protein 17
79652	TMEM204	L	0.533456	transmembrane protein 204
6612	SUMO3	L	0.534244	SMT3 suppressor of mif two 3 homolog 3 (S. cerevisiae)
80273	GRPEL1	H	0.534442	GrpE-like 1, mitochondrial (E. coli)
3655	ITGA6	H	0.534639	integrin, alpha 6
23233	EXOC6B	L	0.535428	exocyst complex component 6B
8303	SNN	L	0.535428	stannin
26043	UBXN7	L	0.535625	UBX domain protein 7
8975	USP13	L	0.536415	ubiquitin specific peptidase 13 (isopeptidase T-3)
9695	EDEM1	H	0.536612	ER degradation enhancer, mannosidase alpha-like 1
5654	HTRA1	L	0.537403	HtrA serine peptidase 1
6565	SLC15A2	L	0.537601	solute carrier family 15 (H+/peptide transporter), member 2
142891	SAMD8	L	0.537798	sterile alpha motif domain containing 8
151888	BTLA	L	0.538392	B and T lymphocyte associated
205428	C3orf58	H	0.539382	chromosome 3 open reading frame 58
89122	TRIM4	L	0.540571	tripartite motif containing 4
55298	RNF121	L	0.541761	ring finger protein 121
81542	TMX1	L	0.542357	thioredoxin-related transmembrane protein 1
9532	BAG2	L	0.542555	BCL2-associated athanogene 2
10434	LYPLA1	H	0.542754	lysophospholipase I
64601	VPS16	L	0.544345	vacuolar protein sorting 16 homolog (S. cerevisiae)
3081	HGD	H	0.544345	homogentisate 1,2-dioxygenase
63929	XPNPEP3	L	0.544345	X-prolyl aminopeptidase (aminopeptidase P) 3, putative
55529	TMEM55A	H	0.544544	transmembrane protein 55A
3394	IRF8	L	0.544942	interferon regulatory factor 8
57799	RAB40C	L	0.54534	RAB40C, member RAS oncogene family
128866	CHMP4B	H	0.546137	chromatin modifying protein 4B
55644	OSGEP	H	0.546336	O-sialoglycoprotein endopeptidase
345275	HSD17B13	H	0.547533	hydroxysteroid (17-beta) dehydrogenase 13
23327	NEDD4L	L	0.547732	neural precursor cell expressed, developmentally down-regulated 4-like
91694	LONRF1	H	0.548731	LON peptidase N-terminal domain and ring finger 1
6865	TACR2	L	0.548931	tachykinin receptor 2
48	ACO1	L	0.548931	aconitase 1, soluble
85365	ALG2	H	0.55013	asparagine-linked glycosylation 2, alpha-1,3-mannosyltransferase homolog (S. cerevisiae)
54476	RNF216	H	0.55053	ring finger protein 216
84851	TRIM52	H	0.55073	tripartite motif containing 52
11161	C14orf1	H	0.55093	chromosome 14 open reading frame 1
114134	SLC2A13	L	0.551531	solute carrier family 2 (facilitated glucose transporter), member 13
23659	PLA2G15	H	0.551535	phospholipase A2, group XV
374868	ATP9B	L	0.551731	ATPase, class II, type 9B
8864	PER2	H	0.552934	period homolog 2 (Drosophila)
3442	IFNA5	H	0.552934	interferon, alpha 5
23654	PLXNB2	L	0.553937	plexin B2
84101	USP44	H	0.554941	ubiquitin specific peptidase 44
25813	SAMM50	H	0.554941	sorting and assembly machinery component 50 homolog (S. cerevisiae)
344558	SH3RF3	L	0.555342	SH3 domain containing ring finger 3
55128	TRIM68	L	0.555543	tripartite motif containing 68
10209	EIF1	L	0.557152	eukaryotic translation initiation factor 1
92181	UBTD2	H	0.557152	ubiquitin domain containing 2
64395	GMCL1	L	0.557354	germ cell-less homolog 1 (Drosophila)
388015	RTL1	L	0.558159	retrotransposon-like 1
26259	FBXW8	H	0.558764	F-box and WD repeat domain containing 8
119032	C10orf32	L	0.559368	chromosome 10 open reading frame 32
285498	RNF212	H	0.559368	ring finger protein 212
10016	PDCD6	H	0.55957	programmed cell death 6
6747	SSR3	L	0.559772	signal sequence receptor, gamma (translocon-associated protein gamma)
6574	SLC20A1	H	0.559772	solute carrier family 20 (phosphate transporter), member 1
253152	EPHX4	H	0.560175	epoxide hydrolase 4
91942	NDUFAF2	L	0.560579	NADH dehydrogenase (ubiquinone) 1 alpha subcomplex, assembly factor 2
10717	AP4B1	L	0.560579	adaptor-related protein complex 4, beta 1 subunit
1855	DVL1	H	0.561185	dishevelled, dsh homolog 1 (Drosophila)
54165	DCUN1D1	L	0.561185	DCN1, defective in cullin neddylation 1, domain containing 1 (S. cerevisiae)
9639	ARHGEF10	L	0.561387	Rho guanine nucleotide exchange factor (GEF) 10
8754	ADAM9	H	0.561387	ADAM metallopeptidase domain 9
5824	PEX19	H	0.561993	peroxisomal biogenesis factor 19
168451	THAP5	H	0.564623	THAP domain containing 5
2329	FMO4	L	0.565231	flavin containing monooxygenase 4
8358	HIST1H3B	L	0.566042	histone cluster 1, H3b
134218	DNAJC21	L	0.566042	DnaJ (Hsp40) homolog, subfamily C, member 21
3108	HLA-DMA	L	0.566448	major histocompatibility complex, class II, DM alpha
54808	DYM	L	0.56665	dymeclin
25793	FBXO7	H	0.567462	F-box protein 7
23081	KDM4C	H	0.567462	lysine (K)-specific demethylase 4C
22818	COPZ1	L	0.567869	coatomer protein complex, subunit zeta 1
9919	SEC16A	L	0.567869	SEC16 homolog A (S. cerevisiae)
11260	XPOT	L	0.568072	exportin, tRNA (nuclear export receptor for tRNAs)
3443	IFNA6	L	0.568209	interferon, alpha 6
7512	XPNPEP2	L	0.568275	X-prolyl aminopeptidase (aminopeptidase P) 2, membrane-bound
26121	PRPF31	H	0.568478	PRP31 pre-mRNA processing factor 31 homolog (S. cerevisiae)
92291	CAPN13	H	0.569495	calpain 13
9852	EPM2AIP1	H	0.569698	EPM2A (laforin) interacting protein 1
2170	FABP3	L	0.570309	fatty acid binding protein 3, muscle and heart (mammary-derived growth inhibitor)
1108	CHD4	H	0.570716	chromodomain helicase DNA binding protein 4
222235	FBXL13	H	0.570716	F-box and leucine-rich repeat protein 13
60509	AGBL5	H	0.570716	ATP/GTP binding protein-like 5
265	AMELX	L	0.571123	amelogenin, X-linked
7375	USP4	L	0.571123	ubiquitin specific peptidase 4 (proto-oncogene)
4653	MYOC	L	0.571734	myocilin, trabecular meshwork inducible glucocorticoid response
55030	FBXO34	H	0.571938	F-box protein 34
[truncated: 934 more rows]
