# Supplementary material for: Pharmacological dimerization and activation of the exchange factor eIF2B antagonizes the integrated stress response
Source: eLife. 2015 Apr 15;4:e07314. doi: 10.7554/eLife.07314 (PMC4426669; doi:10.7554/eLife.07314)
Supplement: Figure 3—source data 1. — DOI: http://dx.doi.org/10.7554/eLife.07314.009 [file elife07314s003.xlsx]

## Sheet: Table 2 MS Raw Data.txt
Accession	Description	Num Pep/Charge Inactive Fraction 6 Replicate 1	Num Pep/Charge Inactive Fraction 7 Replicate 1	Num Pep/Charge Inactive Fraction 8 Replicate 1	Num Pep/Charge Inactive Fraction 9 Replicate 1	Num Pep/Charge Inactive Fraction 6 Replicate 2	Num Pep/Charge Inactive Fraction 7 Replicate 2	Num Pep/Charge Inactive Fraction 8 Replicate 2	Num Pep/Charge Inactive Fraction 9 Replicate 2	Num Pep/Charge ISRIB Fraction 6 Replicate 1	Num Pep/Charge ISRIB Fraction 7 Replicate 1	Num Pep/Charge ISRIB Fraction 8 Replicate 1	Num Pep/Charge ISRIB Fraction 9 Replicate 1	Num Pep/Charge ISRIB Fraction 6 Replicate 2	Num Pep/Charge ISRIB Fraction 7 Replicate 2	Num Pep/Charge ISRIB Fraction 8 Replicate 2	Num Pep/Charge ISRIB Fraction 9 Replicate 2	Instensity Inactive Fraction 6 Replicate 1	Instensity Inactive Fraction 7 Replicate 1	Instensity Inactive Fraction 8 Replicate 1	Instensity Inactive Fraction 9 Replicate 1	Instensity Inactive Fraction 6 Replicate 2	Instensity Inactive Fraction 7 Replicate 2	Instensity Inactive Fraction 8 Replicate 2	Instensity Inactive Fraction 9 Replicate 2	Instensity ISRIB Fraction 6 Replicate 1	Instensity ISRIB Fraction 7 Replicate 1	Instensity ISRIB Fraction 8 Replicate 1	Instensity ISRIB Fraction 9 Replicate 1	Instensity ISRIB Fraction 6 Replicate 2	Instensity ISRIB Fraction 7 Replicate 2	Instensity ISRIB Fraction 8 Replicate 2	Instensity ISRIB Fraction 9 Replicate 2
Q9UBE0	>Q9UBE0|SAE1_HUMAN SUMO-activating enzyme subunit 1 |Homo sapiens	6	5	7	3	4	4	3	6	3	4	6	3	5	4	4	4	20555440	12491500	9163050	4302730	7430520	17139410	5433020	8933690	14641500	6998260	8361940	8822210	13465600	10541560	8064490	4228580
P08670;P41219	>P08670|VIME_HUMAN Vimentin |Homo sapiens;>P41219|PERI_HUMAN Peripherin |Homo sapiens	1	1	1	1	0	0	1	1	0	1	1	1	1	1	1	1	820150	905130	1711100	1225000	0	0	459780	551620	0	508610	1403900	972320	569340	467670	579770	421970
P09651	>P09651|ROA1_HUMAN Heterogeneous nuclear ribonucleoprotein A1 |Homo sapiens	6	7	6	7	7	8	8	7	6	5	5	6	7	5	6	7	14086910	11945220	11558470	12907520	24069590	31074540	20836360	18097680	10324930	9147090	10586810	5739190	27085190	11533160	16822450	14267320
Q9P253	>Q9P253|VPS18_HUMAN Vacuolar protein sorting-associated protein 18 homolog |Homo sapiens	1	5	0	2	1	0	1	3	3	4	1	2	2	4	3	1	311860	10082830	0	1136500	1296000	0	1617300	2008580	1785216	4327060	974670	1398920	1289340	5285840	4370310	479340
Q15631	>Q15631|TSN_HUMAN Translin |Homo sapiens	13	14	6	10	14	11	10	11	16	12	3	8	13	12	10	8	98399440	69920250	4799210	15905800	132182920	23506120	25594710	27872580	129567650	44531040	3854780	14331520	111969680	71172270	40390560	12148680
Q8IX12	>Q8IX12|CCAR1_HUMAN Cell division cycle and apoptosis regulator protein 1 |Homo sapiens	41	35	30	26	40	35	28	26	35	34	28	24	42	29	19	11	313655038	161759560	52269260	34900272	273306570	143662472	76129234	67165945	221547080	151508300	63768540	32866410	330911311	158975170	46267510	10020580
P78346	>P78346|RPP30_HUMAN Ribonuclease P protein subunit p30 |Homo sapiens	5	3	9	13	3	4	11	12	2	4	12	14	6	2	7	13	2575660	4346300	12215560	59260240	1881040	9599720	28452852	90281740	692070	4921540	30758160	79301390	3966440	3448300	17262960	62873400
P22392;O60361;P15531	>P22392|NDKB_HUMAN Nucleoside diphosphate kinase B |Homo sapiens;>O60361|NDK8_HUMAN Putative nucleoside diphosphate kinase |Homo sapiens;>P15531|NDKA_HUMAN Nucleoside diphosphate kinase A |Homo sapiens	3	3	3	3	3	3	3	3	3	3	3	3	3	3	3	3	284735000	113519700	73316800	41756600	227631000	198974000	106970000	42530000	224517000	105996500	100321000	39668200	231793000	160068200	90528000	29584600
Q7Z4S6;O75037	>Q7Z4S6|KI21A_HUMAN Kinesin-like protein KIF21A |Homo sapiens;>O75037|KI21B_HUMAN Kinesin-like protein KIF21B |Homo sapiens	1	1	0	0	1	0	0	0	1	1	0	1	1	1	0	0	1323500	438550	0	0	1224200	0	0	0	1171500	763660	0	145320	1066600	829750	0	0
Q13765;Q9BZK3	>Q13765|NACA_HUMAN Nascent polypeptide-associated complex subunit alpha |Homo sapiens;>Q9BZK3|NACP1_HUMAN Putative nascent polypeptide-associated complex subunit alpha-like protein |Homo sapiens	0	0	0	0	0	0	0	1	0	0	0	0	0	0	0	0	0	0	0	0	0	0	0	1271700	0	0	0	0	0	0	0	0
Q9UID3	>Q9UID3|FFR_HUMAN Protein fat-free homolog |Homo sapiens	0	0	0	0	2	0	0	2	2	1	0	0	2	1	0	0	0	0	0	0	1225370	0	0	919770	1328960	273180	0	0	1365960	335080	0	0
P40123	>P40123|CAP2_HUMAN Adenylyl cyclase-associated protein 2 |Homo sapiens	5	6	3	1	5	6	3	3	5	6	3	2	4	5	3	2	9552090	9611862	3145090	768080	7.40667e+06	12732675	2699901	1355718	6904450	10099390	3065400	1166530	4206353	11223940	4656300	897200
P30101	>P30101|PDIA3_HUMAN Protein disulfide-isomerase A3 |Homo sapiens	15	14	12	12	13	16	14	15	14	14	14	12	14	12	14	12	96335770	51016220	38703260	30832100	53878100	94527600	66146640	41434120	40786070	53498390	51768830	29628380	67749700	75889000	56776350	20361360
P12268;P20839	>P12268|IMDH2_HUMAN Inosine-5-monophosphate dehydrogenase 2 |Homo sapiens;>P20839|IMDH1_HUMAN Inosine-5-monophosphate dehydrogenase 1 |Homo sapiens	2	2	2	2	2	2	2	2	2	2	1	2	2	1	2	2	19209900	30287800	12011800	10802100	7577500	11829400	12525700	9169700	1375010	16610820	18778000	12606300	2798020	19610000	17717100	7483500
P0CG48;P0CG47;P62979;P62987	>P0CG48|UBC_HUMAN Polyubiquitin-C |Homo sapiens;>P0CG47|UBB_HUMAN Polyubiquitin-B |Homo sapiens;>P62979|RS27A_HUMAN Ubiquitin-40S ribosomal protein S27a |Homo sapiens;>P62987|RL40_HUMAN Ubiquitin-60S ribosomal protein L40 |Homo sapiens	4	8	9	8	6	9	8	8	4	7	9	8	4	6	9	9	5668830	34436380	54574030	120538700	12712220	101684600	112132700	107637700	6657900	27612810	58083800	122185900	6575600	32638030	242783500	269630400
CON__P02668	>P02668 SWISS-PROT:P02668 Kappa-casein [Contains: Casoxin C; Casoxin 6; Casoxin A; Casoxin B; Casoplatelin] - Bos taurus (Bovine).	1	0	0	0	0	0	5	0	0	0	0	0	4	0	0	0	734430	0	0	0	0	0	191334200	0	0	0	0	0	35265400	0	0	0
P28072	>P28072|PSB6_HUMAN Proteasome subunit beta type-6 |Homo sapiens	2	1	2	12	3	2	0	11	2	2	4	10	0	0	1	11	337060	453530	1020330	321028300	20065070	4447400	0	183023500	308340	660520	9596490	538993900	0	0	972060	147380800
Q9NQP4	>Q9NQP4|PFD4_HUMAN Prefoldin subunit 4 |Homo sapiens	0	0	1	0	0	0	0	0	0	0	0	0	1	0	0	0	0	0	1010500	0	0	0	0	0	0	0	0	0	866240	0	0	0
O43264	>O43264|ZW10_HUMAN Centromere/kinetochore protein zw10 homolog |Homo sapiens	2	14	1	12	7	0	14	13	8	13	2	15	9	11	13	12	1723050	28763910	451940	23350280	13943690	0	51445910	66481190	8127310	19475140	3336020	51869920	7171028	13106440	57713590	23895250
Q6IA86	>Q6IA86|ELP2_HUMAN Elongator complex protein 2 |Homo sapiens	2	6	5	7	4	4	7	7	3	6	6	8	2	4	6	8	1967360	19558310	5281150	21978580	3191150	6783140	36746800	37446900	3214810	14573170	10727230	26626500	2473580	9752630	21494300	25799810
P13639	>P13639|EF2_HUMAN Elongation factor 2 |Homo sapiens	59	57	52	51	59	55	55	55	56	57	45	48	58	53	54	45	800640990	605770730	206944410	219895910	811735360	306580040	365017380	393050590	798850350	566722590	156584730	234528820	1025848143	624130640	424295590	127107690
P55036;A2A3N6	>P55036|PSMD4_HUMAN 26S proteasome non-ATPase regulatory subunit 4 |Homo sapiens;>A2A3N6|PIPSL_HUMAN Putative PIP5K1A and PSMD4-like protein |Homo sapiens	3	3	5	6	3	4	5	5	3	5	5	5	3	2	3	3	3208331	6004080	15967840	18805300	1820130	10966480	15287000	17270300	1070040	5991189	17491890	18455550	2675930	2652100	10574200	8627450
P13861;P31323	>P13861|KAP2_HUMAN cAMP-dependent protein kinase type II-alpha regulatory subunit |Homo sapiens;>P31323|KAP3_HUMAN cAMP-dependent protein kinase type II-beta regulatory subunit |Homo sapiens	4	3	7	6	4	4	6	6	4	4	6	6	4	4	5	6	14897000	18392700	51856060	45109830	7614240	12422200	49874100	53103000	8118280	11996500	81376730	53954180	11705500	13929620	30063800	40769900
P41252	>P41252|SYIC_HUMAN Isoleucine--tRNA ligase, cytoplasmic |Homo sapiens	20	39	28	46	37	22	48	51	29	38	18	47	30	32	41	48	41328990	166645400	19586580	307865030	80869050	40116390	246926820	516869370	58753600	121429100	14720830	359956450	65156270	98116060	2.30262e+08	223510500
Q86VP6	>Q86VP6|CAND1_HUMAN Cullin-associated NEDD8-dissociated protein 1 |Homo sapiens	6	11	0	4	14	1	4	12	10	7	0	4	11	6	6	3	7453570	16129580	0	2376580	60574000	3090500	9724680	17502570	18349510	7034300	0	2967190	35698420	14464460	15416070	5584200
P49848	>P49848|TAF6_HUMAN Transcription initiation factor TFIID subunit 6 |Homo sapiens	0	0	3	7	0	0	6	7	1	0	6	8	1	1	3	5	0	0	1480170	7574530	0	0	11931060	16349000	266870	0	4777960	12256200	863150	141020	5024960	9147880
Q96FV9	>Q96FV9|THOC1_HUMAN THO complex subunit 1 |Homo sapiens	6	12	8	10	11	8	12	12	9	11	8	11	10	11	9	9	8190800	51919550	8350810	24960070	42096480	16061440	49337200	50306300	21766800	51733660	11457290	34302990	23638770	38348720	41272813	20731380
P61163;P42025	>P61163|ACTZ_HUMAN Alpha-centractin |Homo sapiens;>P42025|ACTY_HUMAN Beta-centractin |Homo sapiens	8	10	14	14	6	10	13	13	4	9	14	12	6	9	15	14	17511510	54939770	282294470	391296800	15285010	77354100	496286300	550447200	11690700	37980210	592207100	480167400	21297760	55044950	295573300	235085800
Q14964;P20340;Q9NRW1	>Q14964|RB39A_HUMAN Ras-related protein Rab-39A |Homo sapiens;>P20340|RAB6A_HUMAN Ras-related protein Rab-6A |Homo sapiens;>Q9NRW1|RAB6B_HUMAN Ras-related protein Rab-6B |Homo sapiens	1	1	1	1	1	1	1	1	1	1	1	1	1	1	1	1	970270	1635800	299010	1318700	1962700	1517400	1176100	1164700	1404400	883810	470750	1127900	1200900	1125100	1763000	1009900
Q9ULH1	>Q9ULH1|ASAP1_HUMAN Arf-GAP with SH3 domain, ANK repeat and PH domain-containing protein 1 |Homo sapiens	0	0	0	0	1	0	0	0	0	0	0	0	0	0	0	0	0	0	0	0	833310	0	0	0	0	0	0	0	0	0	0	0
O14654	>O14654|IRS4_HUMAN Insulin receptor substrate 4 |Homo sapiens	15	18	18	19	16	14	17	17	11	17	18	18	14	16	17	17	16551760	36170760	25240490	43456960	17683860	19418780	44054380	57798890	12230330	29453430	43482080	43693980	17035658	28056030	41915810	30327360
Q5VWG9	>Q5VWG9|TAF3_HUMAN Transcription initiation factor TFIID subunit 3 |Homo sapiens	0	0	2	2	0	0	3	1	0	0	2	1	0	0	1	1	0	0	747610	1382660	0	0	2285460	1000300	0	0	1511970	559720	0	0	323580	404940
Q9Y6G9	>Q9Y6G9|DC1L1_HUMAN Cytoplasmic dynein 1 light intermediate chain 1 |Homo sapiens	24	46	49	46	29	45	50	48	24	42	51	48	24	39	50	46	33255380	479702580	479118090	364835430	31994220	289947341	610120360	324895570	31627200	254152950	661481850	356289840	39282880	240297800	471807540	260240590
P51513	>P51513|NOVA1_HUMAN RNA-binding protein Nova-1 |Homo sapiens	0	1	0	0	0	0	0	0	0	0	0	0	0	0	0	0	0	1083000	0	0	0	0	0	0	0	0	0	0	0	0	0	0
P50990	>P50990|TCPQ_HUMAN T-complex protein 1 subunit theta |Homo sapiens	22	22	21	28	20	20	25	28	15	21	24	26	22	21	26	25	36716460	46940840	38340320	161735570	28086250	38510050	100681270	218924440	20431680	41645180	68015730	210716380	35448020	41536620	85564130	102910490
Q96CS2	>Q96CS2|HAUS1_HUMAN HAUS augmin-like complex subunit 1 |Homo sapiens	2	2	1	1	2	1	0	1	2	1	1	1	2	1	1	1	7033300	2469670	1224400	1619300	3325440	2453600	0	1185700	2859070	2501900	2520800	1063000	5028000	2596000	1420300	879290
Q9H1I8	>Q9H1I8|ASCC2_HUMAN Activating signal cointegrator 1 complex subunit 2 |Homo sapiens	1	2	1	1	2	1	1	2	2	2	1	1	2	1	1	1	14300000	5510810	3800200	4033800	20289600	21132000	8883400	11467300	8709200	9124210	4235100	2517900	8081490	5380200	6236100	3959400
P14868	>P14868|SYDC_HUMAN Aspartate--tRNA ligase, cytoplasmic |Homo sapiens	24	30	36	38	18	28	35	36	14	29	35	35	21	26	35	38	31093510	74099380	99406650	256304270	26032530	83494280	178420350	293610430	12465020	65747340	167340490	332239710	28873365	62082990	190548290	248434940
P20585	>P20585|MSH3_HUMAN DNA mismatch repair protein Msh3 |Homo sapiens	2	2	2	1	2	2	1	1	2	2	1	2	2	1	1	2	656720	848300	525920	1127900	1741590	1474100	224890	507500	1454680	891580	826290	408270	1498180	515930	669340	2022000
Q9Y3Y2	>Q9Y3Y2|CHTOP_HUMAN Chromatin target of PRMT1 protein |Homo sapiens	3	3	3	0	3	3	1	1	2	3	1	1	4	3	1	1	12343400	4342770	1769030	0	12768940	10946400	1436600	445060	7866600	4388780	815850	245200	11615974	4900990	976390	517190
Q01082	>Q01082|SPTB2_HUMAN Spectrin beta chain, brain 1 |Homo sapiens	59	66	29	54	88	57	62	63	66	65	23	61	66	63	61	53	169914010	411572722	17227149	74338747	717802840	125778580	153365530	142676651	442076143	387932158	17203110	106998965	415249819	360955280	247317443	84457140
P06737;P11217	>P06737|PYGL_HUMAN Glycogen phosphorylase, liver form |Homo sapiens;>P11217|PYGM_HUMAN Glycogen phosphorylase, muscle form |Homo sapiens	6	5	2	5	9	2	4	3	8	6	2	5	8	5	4	4	11395040	10489280	754560	2902190	35787600	1047070	4261440	2334930	30761800	9722650	632050	3802450	25985930	8765800	3319232	2823000
Q9NYF8	>Q9NYF8|BCLF1_HUMAN Bcl-2-associated transcription factor 1 |Homo sapiens	4	5	6	4	5	5	5	4	3	3	4	3	4	3	1	2	6660630	7556900	9143800	4823100	6764800	16730700	7938990	5037450	1211940	1634960	4135610	2261430	765144	1913400	500640	623940
Q08378	>Q08378|GOGA3_HUMAN Golgin subfamily A member 3 |Homo sapiens	5	4	4	6	3	3	2	2	5	5	5	3	3	3	3	2	4740910	3270150	2919190	4211710	1501410	2792210	1860570	1301280	3989770	3325195	4521390	2723660	2365360	3076220	2906130	2052510
Q86XI2	>Q86XI2|CNDG2_HUMAN Condensin-2 complex subunit G2 |Homo sapiens	2	4	0	1	5	0	1	3	8	5	0	3	4	4	1	1	688050	8799850	0	556470	14865990	0	364800	2586800	23342020	34533130	0	2375710	6869620	7194530	2372900	281770
CON__P60712;P60709;Q6S8J3;P63261	>P60712 SWISS-PROT:P60712 (Bos taurus) Actin, cytoplasmic 1;>P60709|ACTB_HUMAN Actin, cytoplasmic 1 |Homo sapiens;>Q6S8J3|POTEE_HUMAN POTE ankyrin domain family member E |Homo sapiens;>P63261|ACTG_HUMAN Actin, cytoplasmic 2 |Homo sapiens	8	8	8	8	8	8	8	8	7	8	8	8	8	8	8	8	117581100	104343300	91958700	107939000	72673600	93840600	93877400	115492000	76996500	101363200	175793200	152903900	93721700	102391600	57660000	59105100
Q9UBS4	>Q9UBS4|DJB11_HUMAN DnaJ homolog subfamily B member 11 |Homo sapiens	1	1	1	1	1	1	0	0	1	1	0	0	1	1	0	0	805720	746070	1266100	557010	414780	731200	0	0	457530	643720	0	0	615650	739630	0	0
Q8NFH4	>Q8NFH4|NUP37_HUMAN Nucleoporin Nup37 |Homo sapiens	4	5	5	3	2	3	4	2	2	5	5	4	2	4	2	3	2808910	6677410	5819270	2016710	475058	10255400	5956910	3643400	1094800	8744030	10089750	2585920	966820	6645590	5855000	3138520
P49327	>P49327|FAS_HUMAN Fatty acid synthase |Homo sapiens	46	208	183	216	110	172	244	237	117	208	173	222	110	194	241	224	31792790	6152027400	1013244730	3954847160	209238297	987399830	11037710940	9532652800	296443080	5079528450	905278150	6557378350	244639996	3872933151	12434886263	4459322750
Q92599;Q9NVA2	>Q92599|SEPT8_HUMAN Septin-8 |Homo sapiens;>Q9NVA2|SEP11_HUMAN Septin-11 |Homo sapiens	1	1	1	1	1	0	0	1	1	1	1	0	1	1	0	0	5694300	1446000	1696500	198800	3745200	0	0	1325400	3666600	1547500	916960	0	3509400	1369400	0	0
P28332	>P28332|ADH6_HUMAN Alcohol dehydrogenase 6 |Homo sapiens	1	1	1	1	2	1	0	0	1	1	0	0	1	0	0	0	335220	509990	235240	21341	998550	212020	0	0	157250	479060	0	0	458000	0	0	0
P08238;Q58FF8	>P08238|HS90B_HUMAN Heat shock protein HSP 90-beta |Homo sapiens;>Q58FF8|H90B2_HUMAN Putative heat shock protein HSP 90-beta 2 |Homo sapiens	2	3	3	2	3	1	1	1	2	3	3	2	3	2	2	2	46248000	67017000	35890700	12835200	46838800	12452000	14581000	14098000	27070000	44988000	27326400	10869700	61156000	31442000	15359200	3258890
P46013	>P46013|KI67_HUMAN Antigen KI-67 |Homo sapiens	13	13	17	14	15	12	9	12	11	15	19	18	11	11	10	8	9638930	8144400	13928469	12697870	17210500	11899890	11711550	18118250	6595790	12776140	27444120	19973300	8735560	9802260	9882440	6578990
O60306	>O60306|AQR_HUMAN Intron-binding protein aquarius |Homo sapiens	0	0	0	0	0	0	0	0	1	0	0	0	0	0	0	0	0	0	0	0	0	0	0	0	1857400	0	0	0	0	0	0	0
Q13765	>Q13765|NACA_HUMAN Nascent polypeptide-associated complex subunit alpha |Homo sapiens	1	1	1	1	1	1	0	1	0	0	1	1	0	1	0	0	916730	921330	1051600	565200	781650	1041300	0	1308200	0	0	552970	452840	0	351840	0	0
Q13557;Q9UQM7;Q13555;Q13554	>Q13557|KCC2D_HUMAN Calcium/calmodulin-dependent protein kinase type II subunit delta |Homo sapiens;>Q9UQM7|KCC2A_HUMAN Calcium/calmodulin-dependent protein kinase type II subunit alpha |Homo sapiens;>Q13555|KCC2G_HUMAN Calcium/calmodulin-dependent protein	1	4	4	4	1	3	4	4	1	3	4	3	1	3	2	4	73151	4242650	8574990	9428310	117240	2335350	22213400	17255300	32901	1514320	17600830	10603560	68275	2463190	11799700	10020300
Q15029	>Q15029|U5S1_HUMAN 116 kDa U5 small nuclear ribonucleoprotein component |Homo sapiens	9	8	24	36	9	5	27	38	6	10	28	37	10	5	21	34	4444660	5209820	23288154	205386880	7119290	6436910	129527940	428832910	3737750	7312030	52299830	244642120	5890790	3114560	66890840	145008390
Q9NWB7	>Q9NWB7|IFT57_HUMAN Intraflagellar transport protein 57 homolog |Homo sapiens	2	2	2	2	1	2	2	2	3	3	3	2	2	2	3	1	1471160	1943580	2788500	1586990	1757400	3106880	5004170	3131980	3461640	3114880	5274790	2451800	1130640	1988050	5225500	1319600
Q9H974	>Q9H974|QTRD1_HUMAN Queuine tRNA-ribosyltransferase subunit QTRTD1 |Homo sapiens	1	0	0	0	0	0	0	1	1	0	0	0	1	0	1	0	934800	0	0	0	0	0	0	726800	1401300	0	0	0	1423900	0	569490	0
Q92599;Q9NVA2;Q14141	>Q92599|SEPT8_HUMAN Septin-8 |Homo sapiens;>Q9NVA2|SEP11_HUMAN Septin-11 |Homo sapiens;>Q14141|SEPT6_HUMAN Septin-6 |Homo sapiens	3	3	3	3	3	3	3	3	3	3	3	3	3	3	2	3	15873500	5817600	5321680	3249670	7019200	7720200	4909200	3066130	12013000	5778000	4506410	1924770	12206000	6508260	2293490	1286790
Q9P260	>Q9P260|K1468_HUMAN LisH domain and HEAT repeat-containing protein KIAA1468 |Homo sapiens	1	1	0	1	1	0	1	1	1	1	0	1	1	1	0	0	443250	910380	0	457090	1181300	0	522260	594660	991070	561330	0	303550	646030	401940	0	0
Q9NRR5;Q9UMX0	>Q9NRR5|UBQL4_HUMAN Ubiquilin-4 |Homo sapiens;>Q9UMX0|UBQL1_HUMAN Ubiquilin-1 |Homo sapiens	3	3	3	2	3	3	3	3	3	3	3	2	3	3	3	3	30405300	28959300	11801700	3428510	21330500	40770400	21025800	14727600	14887400	23847600	24602000	1735530	27515800	33915300	21067000	9870500
Q9BTC8	>Q9BTC8|MTA3_HUMAN Metastasis-associated protein MTA3 |Homo sapiens	1	2	0	1	2	2	2	2	2	2	2	2	2	2	1	1	1028100	6923500	0	860520	1557470	3867490	2929170	1776480	2167390	8468300	4454300	1821860	2534320	7455500	3649300	756140
Q8IYS1	>Q8IYS1|P20D2_HUMAN Peptidase M20 domain-containing protein 2 |Homo sapiens	4	3	3	1	3	2	0	1	3	4	3	2	4	4	1	1	13772100	4037840	2458570	659300	4566180	7610300	0	1335500	3007110	2993910	3892040	1250760	7763330	6152320	1379100	644920
Q13045	>Q13045|FLII_HUMAN Protein flightless-1 homolog |Homo sapiens	1	0	0	0	1	0	0	0	3	0	0	0	1	0	0	0	1128800	0	0	0	1923300	0	0	0	1937520	0	0	0	1642200	0	0	0
Q01130	>Q01130|SRSF2_HUMAN Serine/arginine-rich splicing factor 2 |Homo sapiens	1	1	1	1	1	1	1	1	1	1	1	1	1	1	1	1	4187100	1823100	2343500	1655400	3156700	3444800	3407100	3624800	1326900	1315200	2877300	3277900	1443800	1000200	2266000	1218200
O14974	>O14974|MYPT1_HUMAN Protein phosphatase 1 regulatory subunit 12A |Homo sapiens	2	2	3	1	2	2	0	2	1	2	1	1	3	2	2	2	3140100	1813420	1469220	350410	1095330	3395300	0	819490	683700	1587180	294410	298970	2287910	1795320	1222130	1128680
O15460	>O15460|P4HA2_HUMAN Prolyl 4-hydroxylase subunit alpha-2 |Homo sapiens	6	5	6	3	6	7	6	5	3	5	6	2	5	6	2	2	8717410	8963160	6433230	1804900	8403810	15697200	11698420	4858760	3233140	10867200	9934570	1265710	6565860	13504800	2194380	736830
Q9UK45	>Q9UK45|LSM7_HUMAN U6 snRNA-associated Sm-like protein LSm7 |Homo sapiens	1	1	1	1	1	1	1	1	1	1	1	1	1	1	1	0	2960700	2672100	2966000	1592500	2627200	5007700	4368300	2766400	1930300	2262000	2891800	708250	1840200	2520600	1660200	0
Q13813	>Q13813|SPTA2_HUMAN Spectrin alpha chain, brain |Homo sapiens	87	81	81	83	117	111	94	70	76	85	59	84	84	93	98	87	451343290	420064800	127243184	136195370	959375990	699068860	307426980	151364330	391004251	450122329	116156093	147779960	464397711	508303920	3.80246e+08	149165830
P13639;Q15029	>P13639|EF2_HUMAN Elongation factor 2 |Homo sapiens;>Q15029|U5S1_HUMAN 116 kDa U5 small nuclear ribonucleoprotein component |Homo sapiens	2	2	1	2	1	1	2	2	2	2	1	2	2	2	2	2	17215190	12911020	3592900	7468210	15834000	8071000	8885850	11854960	14283880	10720740	4116900	13736440	19693120	14393320	14363200	9713490
Q07812	>Q07812|BAX_HUMAN Apoptosis regulator BAX |Homo sapiens	0	1	0	1	1	1	1	1	0	1	1	1	1	1	1	1	0	1249900	0	1968700	1290600	703920	2182100	3802800	0	1013800	472150	2006100	1146800	1028400	2511500	1487100
P11940;Q96DU9	>P11940|PABP1_HUMAN Polyadenylate-binding protein 1 |Homo sapiens;>Q96DU9|PABP5_HUMAN Polyadenylate-binding protein 5 |Homo sapiens	1	1	1	1	0	0	0	1	1	1	1	1	1	0	1	0	563880	463940	549540	860050	0	0	0	716080	439540	374500	415990	1019700	774290	0	1770100	0
P35908;CON__P35908;CON__Q7Z794;Q7Z794;CON__Q6IFZ6;CON__Q6NXH9;CON__Q9R0H5;CON__Q32MB2;Q86Y46;CON__Q7RTS7;Q7RTS7;CON__Q3SY84;Q3SY84;CON__Q14CN4-1;Q14CN4;CON__Q6IME9	>P35908|K22E_HUMAN Keratin, type II cytoskeletal 2 epidermal |Homo sapiens;>P35908 SWISS-PROT:P35908 Tax_Id=9606 Gene_Symbol=KRT2 Keratin, type II cytoskeletal 2 epidermal;>Q7Z794 SWISS-PROT:Q7Z794 Tax_Id=9606 Gene_Symbol=KRT77 Keratin 77;>Q7Z794|K2C1B_HUM	1	1	1	1	1	1	1	1	1	1	1	1	1	1	1	1	1192900	1158000	1071500	1719000	281800	1535600	4535200	2045300	1449400	777850	1688200	924330	1138700	1192900	1148800	1508100
Q9H4L5;Q9BZF2	>Q9H4L5|OSBL3_HUMAN Oxysterol-binding protein-related protein 3 |Homo sapiens;>Q9BZF2|OSBL7_HUMAN Oxysterol-binding protein-related protein 7 |Homo sapiens	1	1	1	1	1	1	1	0	1	1	1	1	1	1	1	1	1393200	2511900	625380	776610	3051400	5718500	1636700	0	1682300	3133700	789290	898030	57495	2167100	4580700	1689100
P22626	>P22626|ROA2_HUMAN Heterogeneous nuclear ribonucleoproteins A2/B1 |Homo sapiens	12	12	12	11	12	12	11	11	11	12	11	11	11	11	11	11	45364480	27389300	28737620	17713790	43120130	62970800	40083790	34338710	30154530	29128150	29708400	18493140	43183900	35486950	33458500	17329550
Q16181	>Q16181|SEPT7_HUMAN Septin-7 |Homo sapiens	31	29	29	26	31	27	24	23	28	28	27	22	30	29	23	18	353795880	155290890	102917110	52504750	233738310	208762740	99713580	62131970	220603080	114512510	88944030	48628520	251500970	154386620	81499650	27233410
Q13144	>Q13144|EI2BE_HUMAN Translation initiation factor eIF-2B subunit epsilon |Homo sapiens	5	7	0	2	5	0	1	1	7	8	3	5	7	8	6	4	3895420	6647520	0	549460	12183820	0	1391700	1006700	18938260	38413490	1544990	4020900	19752010	27938820	1.61497e+07	4792548
P78371	>P78371|TCPB_HUMAN T-complex protein 1 subunit beta |Homo sapiens	33	40	50	56	36	43	46	54	25	33	47	56	29	34	43	55	70788200	117707655	205470540	522662200	54127990	204206580	277380980	608331800	41307000	107368420	304281435	602206352	70228090	112325540	211838490	378426270
O43583	>O43583|DENR_HUMAN Density-regulated protein |Homo sapiens	1	1	1	1	1	1	1	1	1	1	1	1	1	1	0	0	702750	495530	434800	452350	511840	722520	742240	1172600	244730	466050	446220	154140	285770	297080	0	0
P21359	>P21359|NF1_HUMAN Neurofibromin |Homo sapiens	0	2	0	2	0	1	1	1	0	2	0	3	1	3	3	2	0	1274940	0	1388950	0	429330	1711500	1445900	0	1579610	0	2555060	271040	1364110	6550930	1227910
Q15365	>Q15365|PCBP1_HUMAN Poly(rC)-binding protein 1 |Homo sapiens	11	10	10	12	12	9	11	11	9	10	10	11	10	10	10	8	48763600	38410520	37783200	50582700	34731610	31732100	77566890	63700930	23966145	37099580	44667260	37244750	30362400	33548070	27923260	13103500
O94776	>O94776|MTA2_HUMAN Metastasis-associated protein MTA2 |Homo sapiens	30	36	34	32	25	38	36	36	25	38	37	34	31	34	37	28	62096710	240446070	151129130	79745560	59343518	252334900	253771480	118881000	46181240	318022700	220200870	97141860	66305690	313991270	322315495	86898010
P40926	>P40926|MDHM_HUMAN Malate dehydrogenase, mitochondrial |Homo sapiens	16	16	17	14	17	18	14	14	15	16	15	14	16	15	15	13	122664730	84083760	52515090	41154230	132221900	177982500	91080310	74019650	82482800	75791640	69647900	41332370	109710420	107726090	77914830	34078580
Q06265	>Q06265|EXOS9_HUMAN Exosome complex component RRP45 |Homo sapiens	11	11	8	8	10	9	9	8	11	10	10	11	11	10	7	6	67245770	71918940	12310930	11690370	69094240	47757560	19210501	14179354	62234550	62456780	17832506	9845027	68739650	72624900	27461900	5930447
Q9HC35	>Q9HC35|EMAL4_HUMAN Echinoderm microtubule-associated protein-like 4 |Homo sapiens	4	3	1	2	3	3	2	2	2	3	2	2	3	3	2	2	6176640	4239750	544670	1720580	6731300	3549330	2193710	1745350	2503990	2781660	1187440	1604220	5927000	1672710	1622290	1257060
P67775;P62714	>P67775|PP2AA_HUMAN Serine/threonine-protein phosphatase 2A catalytic subunit alpha isoform |Homo sapiens;>P62714|PP2AB_HUMAN Serine/threonine-protein phosphatase 2A catalytic subunit beta isoform |Homo sapiens	9	9	6	5	8	8	9	6	9	9	8	7	8	8	7	4	56166570	63376520	10041350	13969800	44462200	41594200	37650400	21825400	35016220	32927660	15775030	11639000	44322900	27453980	18318300	4450190
Q6GYQ0	>Q6GYQ0|RGPA1_HUMAN Ral GTPase-activating protein subunit alpha-1 |Homo sapiens	1	3	1	2	1	0	4	3	1	2	0	3	0	3	4	1	244120	5381300	645310	3188140	460090	0	9371900	9562010	705030	3335410	0	8917000	0	4507020	14928200	5673000
Q14203	>Q14203|DCTN1_HUMAN Dynactin subunit 1 |Homo sapiens	43	52	83	101	39	34	100	103	46	53	93	104	51	48	91	98	67132763	114962680	282188883	817540332	60873267	67967250	1036026390	1298730171	68333876	131189300	584723335	952533630	101120004	115757910	701308970	658432138
P35241	>P35241|RADI_HUMAN Radixin |Homo sapiens	2	0	0	0	1	0	1	1	0	0	0	0	1	0	0	1	2166640	0	0	0	3399000	0	1312200	548640	0	0	0	0	1041500	0	0	505780
P30084	>P30084|ECHM_HUMAN Enoyl-CoA hydratase, mitochondrial |Homo sapiens	15	12	12	10	15	13	12	9	14	14	9	9	16	12	8	9	103717100	40539590	21437760	13431380	86132970	63709760	42331260	21604680	74508300	33145280	15718760	8748530	92996300	37694350	17041050	9250760
O75533	>O75533|SF3B1_HUMAN Splicing factor 3B subunit 1 |Homo sapiens	64	82	37	64	82	45	66	66	81	84	19	63	83	77	67	58	248078460	961860160	28265238	134444300	889964630	95413760	327784750	335216890	922137800	822081210	10201360	186099730	785367856	665897255	337552500	93341160
O43617	>O43617|TPPC3_HUMAN Trafficking protein particle complex subunit 3 |Homo sapiens	3	3	4	2	3	3	3	3	2	3	3	3	3	3	3	3	11875800	18746900	6111560	4532900	9745500	16872200	9728900	7296200	10495800	17960400	8060570	7396470	14430200	21725400	17235200	5688000
P09429;B2RPK0;P23497	>P09429|HMGB1_HUMAN High mobility group protein B1 |Homo sapiens;>B2RPK0|HGB1A_HUMAN Putative high mobility group protein B1-like 1 |Homo sapiens;>P23497|SP100_HUMAN Nuclear autoantigen Sp-100 |Homo sapiens	3	2	3	3	2	3	2	3	3	3	3	2	2	2	2	1	4484590	1301540	3914040	2925320	2494500	8305230	3969190	3846880	2118850	2177320	3001980	1012500	1349700	1714120	3492200	822730
Q96I25	>Q96I25|SPF45_HUMAN Splicing factor 45 |Homo sapiens	8	8	6	7	8	8	8	7	8	8	8	4	7	5	6	4	36952130	21983680	7739420	6555370	34102070	56208100	24125250	13271820	19774620	21751860	11651700	3622520	14629350	20380410	11130636	4751790
O60925	>O60925|PFD1_HUMAN Prefoldin subunit 1 |Homo sapiens	5	4	5	5	5	3	5	5	4	5	4	5	5	5	4	4	26412300	14989200	9480730	6401450	17705700	16906000	11275410	7367090	6134840	11357800	5584390	4489580	17745100	15232200	9990320	4054550
Q8IWX8	>Q8IWX8|CHERP_HUMAN Calcium homeostasis endoplasmic reticulum protein |Homo sapiens	3	3	4	3	4	3	4	3	4	4	3	3	4	3	3	2	14604600	10015800	4960096	3548060	12963050	4866900	5938170	7123100	15719100	9922750	5577000	3572880	20200950	10052700	4659900	928860
P08134;P61586	>P08134|RHOC_HUMAN Rho-related GTP-binding protein RhoC |Homo sapiens;>P61586|RHOA_HUMAN Transforming protein RhoA |Homo sapiens	1	1	1	1	1	1	1	1	1	1	1	1	1	1	1	0	1646000	1499700	422100	1160200	2903800	2039200	1897100	2011500	1741900	2528200	523640	880180	2231500	1796700	1430900	0
Q16543	>Q16543|CDC37_HUMAN Hsp90 co-chaperone Cdc37 |Homo sapiens	6	7	6	7	7	6	7	7	6	7	6	6	6	6	6	7	28931000	18090300	9168720	8594930	23465650	19103200	14868150	13356820	18979700	17149700	11532160	9314470	24249400	20090500	12750800	6639510
P62258	>P62258|1433E_HUMAN 14-3-3 protein epsilon |Homo sapiens	11	9	12	11	13	11	12	12	6	7	9	10	9	9	11	11	67589240	55872390	44361990	43839380	111825360	188934500	113157850	69772340	21136500	36847700	26599660	45930950	41755570	71703940	148889610	59797890
O00422	>O00422|SAP18_HUMAN Histone deacetylase complex subunit SAP18 |Homo sapiens	0	0	0	0	0	0	1	0	0	0	0	0	0	0	0	0	0	0	0	0	0	0	627280	0	0	0	0	0	0	0	0	0
Q9BZK7;O60907;Q9BQ87	>Q9BZK7|TBL1R_HUMAN F-box-like/WD repeat-containing protein TBL1XR1 |Homo sapiens;>O60907|TBL1X_HUMAN F-box-like/WD repeat-containing protein TBL1X |Homo sapiens;>Q9BQ87|TBL1Y_HUMAN F-box-like/WD repeat-containing protein TBL1Y |Homo sapiens	1	1	1	1	0	1	1	1	1	1	1	1	1	1	1	0	11168000	8398800	4907000	2305500	0	4378000	4540500	4048100	5109500	7046100	4338100	1913600	7507800	6168700	2452700	0
Q15910;Q92800	>Q15910|EZH2_HUMAN Histone-lysine N-methyltransferase EZH2 |Homo sapiens;>Q92800|EZH1_HUMAN Histone-lysine N-methyltransferase EZH1 |Homo sapiens	1	1	1	0	2	1	1	0	1	1	1	0	1	1	0	0	879180	2400000	3453200	0	1785570	3036000	1060500	0	475590	2093600	5164200	0	18861	2895000	0	0
Q9H7N4	>Q9H7N4|SFR19_HUMAN Splicing factor, arginine/serine-rich 19 |Homo sapiens	0	0	1	0	1	0	0	0	0	1	1	1	0	0	1	2	0	0	978850	0	807240	0	0	0	0	1720900	6972700	3452900	0	0	4722100	8611700
Q01081;Q8WU68	>Q01081|U2AF1_HUMAN Splicing factor U2AF 35 kDa subunit |Homo sapiens;>Q8WU68|U2AF4_HUMAN Splicing factor U2AF 26 kDa subunit |Homo sapiens	2	2	2	1	2	2	2	1	2	2	2	2	2	2	2	2	30758500	20155900	13617300	6300100	16710000	37358300	16323020	8491000	18064700	17226100	13966100	6819900	21732900	24785400	10215900	5719270
Q9UPU5	>Q9UPU5|UBP24_HUMAN Ubiquitin carboxyl-terminal hydrolase 24 |Homo sapiens	4	5	0	1	7	0	2	1	12	5	0	2	8	4	2	1	2926960	5228190	0	206620	14483500	0	818120	830900	25855100	4893350	0	1007610	13341900	3346980	1453460	217100
P17174	>P17174|AATC_HUMAN Aspartate aminotransferase, cytoplasmic |Homo sapiens	6	5	5	4	6	6	4	5	6	5	6	4	5	5	4	2	15561870	8051270	4361870	3294520	15352640	17991930	8096900	5205400	7948630	6818770	11087910	3160810	10725770	9367120	6641940	1373050
O75792	>O75792|RNH2A_HUMAN Ribonuclease H2 subunit A |Homo sapiens	1	1	1	1	1	1	1	1	1	0	1	1	0	1	0	0	1454600	987470	1276300	1269900	783570	1425300	1217900	1095800	361610	0	961960	801610	0	1065100	0	0
Q9UK76	>Q9UK76|HN1_HUMAN Hematological and neurological expressed 1 protein |Homo sapiens	1	0	1	1	0	0	0	0	0	1	1	0	0	1	0	0	624950	0	490450	363340	0	0	0	0	0	302880	283410	0	0	413300	0	0
Q9UNM6	>Q9UNM6|PSD13_HUMAN 26S proteasome non-ATPase regulatory subunit 13 |Homo sapiens	14	13	13	17	14	15	18	19	16	15	16	17	16	16	13	18	38125020	47955050	15622180	106393730	57605720	29081690	74651020	156621500	65522550	72215320	38973770	149619810	70237140	53840650	66212980	99585110
P09874	>P09874|PARP1_HUMAN Poly [ADP-ribose] polymerase 1 |Homo sapiens	44	41	33	34	50	40	34	42	36	35	29	35	41	31	35	31	304653080	240360660	99023290	104129330	311875090	242489190	179705100	223209010	208289850	144210850	84656640	116097120	264789849	182421200	195068275	80851690
P60891;P21108	>P60891|PRPS1_HUMAN Ribose-phosphate pyrophosphokinase 1 |Homo sapiens;>P21108|PRPS3_HUMAN Ribose-phosphate pyrophosphokinase 3 |Homo sapiens	5	5	5	5	5	5	3	4	5	5	5	5	5	5	5	5	24162800	16008100	5913530	7882650	32271400	18714700	10420000	10753700	17479260	13694790	9430800	8380940	20295970	18377440	15470870	6890020
Q15648	>Q15648|MED1_HUMAN Mediator of RNA polymerase II transcription subunit 1 |Homo sapiens	0	1	1	2	1	1	0	3	0	0	0	2	1	0	1	2	0	184910	256330	2013620	61876	142440	0	3504200	0	0	0	620900	68883	0	15768	970330
Q9Y2S0	>Q9Y2S0|RPAC2_HUMAN DNA-directed RNA polymerases I and III subunit RPAC2 |Homo sapiens	5	14	16	15	3	16	16	14	3	12	17	16	4	13	15	16	4547760	78713630	148361800	93733800	4082230	94712130	154882700	82400670	1249350	57557930	236055700	94678690	3484590	76914210	97491890	68917660
Q99832	>Q99832|TCPH_HUMAN T-complex protein 1 subunit eta |Homo sapiens	20	24	23	26	15	21	24	26	17	22	25	26	21	22	22	24	23227880	34781990	43907530	146459900	21636040	28502810	77094860	185432440	15824650	26072190	63759230	149611440	23120110	31979610	68833370	56978470
Q76FK4	>Q76FK4|NOL8_HUMAN Nucleolar protein 8 |Homo sapiens	7	8	7	6	7	9	4	4	6	10	9	6	7	8	6	4	5194910	14247990	5740230	1463411	5253930	19786850	5086220	2378760	3855100	23989910	10586520	2097690	5780100	16915130	9495710	3609720
Q9BXP5	>Q9BXP5|SRRT_HUMAN Serrate RNA effector molecule homolog |Homo sapiens	4	5	4	3	4	4	2	3	4	4	4	3	5	4	2	2	21820400	22836080	7009410	4279590	13321270	6575440	6826870	3253300	12306320	18125790	6602920	4464750	15775660	23154320	8174100	2974440
Q12962	>Q12962|TAF10_HUMAN Transcription initiation factor TFIID subunit 10 |Homo sapiens	6	5	7	7	2	6	6	6	3	5	7	7	3	3	5	6	5504230	6929840	21486810	17348950	1466390	6094570	19523400	13879400	2787770	6920657	28488290	15438419	3447160	7318050	10268170	8260280
Q92558	>Q92558|WASF1_HUMAN Wiskott-Aldrich syndrome protein family member 1 |Homo sapiens	2	2	2	1	2	2	1	1	2	2	2	1	2	2	2	1	3188600	1390690	944430	321110	2477900	1991010	680610	320100	2019210	1666590	820670	340840	3013690	1967950	1178380	221240
Q7Z4S6	>Q7Z4S6|KI21A_HUMAN Kinesin-like protein KIF21A |Homo sapiens	2	1	1	0	1	1	0	0	2	1	1	1	2	1	0	0	1313760	628080	188620	0	566470	388810	0	0	1119600	287680	204460	301180	1471920	578480	0	0
Q9P0K7	>Q9P0K7|RAI14_HUMAN Ankycorbin |Homo sapiens	1	1	0	0	1	0	0	1	3	1	0	0	1	1	0	0	619780	330410	0	0	449700	0	0	196740	1992510	411940	0	0	843010	543140	0	0
Q9Y678;Q9UBF2	>Q9Y678|COPG_HUMAN Coatomer subunit gamma |Homo sapiens;>Q9UBF2|COPG2_HUMAN Coatomer subunit gamma-2 |Homo sapiens	2	4	2	3	3	3	2	3	4	4	2	3	4	4	3	3	3960880	62296920	2128120	9967700	19459400	17126000	12919500	16446400	16358760	57576290	2104220	10454800	14219180	43473370	39809500	9338260
Q01518;P40123	>Q01518|CAP1_HUMAN Adenylyl cyclase-associated protein 1 |Homo sapiens;>P40123|CAP2_HUMAN Adenylyl cyclase-associated protein 2 |Homo sapiens	1	1	1	1	1	1	1	1	1	1	1	1	1	1	1	1	9410500	3455800	2922900	1101400	6204200	8411400	2150300	2199700	6051400	4961800	1997100	1135900	5738200	6332300	4263500	859400
Q9Y4E1;Q641Q2;Q5SNT6	>Q9Y4E1|FA21C_HUMAN WASH complex subunit FAM21C |Homo sapiens;>Q641Q2|FA21A_HUMAN WASH complex subunit FAM21A |Homo sapiens;>Q5SNT6|FA21B_HUMAN WASH complex subunit FAM21B |Homo sapiens	11	10	8	8	10	11	6	8	10	10	10	4	10	8	5	3	32990780	16236010	11689430	7826450	24633140	29131950	9314880	8528090	24651110	27166740	15015520	3404460	28483500	14755940	5615570	1429220
P23610	>P23610|F8I2_HUMAN Factor VIII intron 22 protein |Homo sapiens	7	5	1	0	5	4	1	1	7	4	1	1	6	7	1	1	10231620	4605210	208140	0	7135760	7378910	539510	253960	6461940	4413240	534660	216340	13573950	12988460	751180	474270
Q9BXV9	>Q9BXV9|CN142_HUMAN Uncharacterized protein C14orf142 |Homo sapiens	1	0	1	0	1	1	0	0	0	1	0	0	1	1	1	0	1272900	0	491120	0	716740	907900	0	0	0	460010	0	0	341390	401200	975610	0
O95347;Q8IYE0;Q8NEM0	>O95347|SMC2_HUMAN Structural maintenance of chromosomes protein 2 |Homo sapiens;>Q8IYE0|CC146_HUMAN Coiled-coil domain-containing protein 146 |Homo sapiens;>Q8NEM0|MCPH1_HUMAN Microcephalin |Homo sapiens	0	1	0	0	1	1	1	1	0	1	0	1	1	0	1	0	0	5893700	0	0	2665600	6086100	2415300	3449000	0	7145400	0	1504500	2890400	0	3874700	0
Q99460	>Q99460|PSMD1_HUMAN 26S proteasome non-ATPase regulatory subunit 1 |Homo sapiens	5	15	9	32	12	7	21	32	13	10	9	33	13	13	18	26	4379240	34668040	8050050	156229950	20452030	9144560	82083110	270571680	24838480	27266170	50793210	254920930	21779430	31674380	68598080	106762620
O75390	>O75390|CISY_HUMAN Citrate synthase, mitochondrial |Homo sapiens	4	3	1	1	4	2	3	3	4	3	0	3	4	3	4	2	12867300	8176650	247440	216410	21968700	10952700	15357400	13079840	14688910	7073020	0	6973800	17814800	12680500	12012680	5383300
REV__Q96T49	>Q96T49|PP16B_HUMAN Protein phosphatase 1 regulatory inhibitor subunit 16B |Homo sapiens	1	1	1	1	1	1	1	1	1	1	1	1	1	1	1	1	1699800	1993000	1336300	1531300	1929500	3468500	1885800	1716300	1081400	1736100	2065300	1540900	1730100	2053600	2485000	2075700
P16930	>P16930|FAAA_HUMAN Fumarylacetoacetase |Homo sapiens	1	0	1	0	1	1	0	0	2	1	1	0	1	1	0	0	1990300	0	565630	0	736840	785010	0	0	2149100	619230	398910	0	997840	989610	0	0
Q9Y4L5	>Q9Y4L5|RN115_HUMAN E3 ubiquitin-protein ligase RNF115 |Homo sapiens	0	0	1	1	0	1	1	1	0	0	1	1	0	1	1	1	0	0	437970	739980	0	570210	924940	677910	0	0	845240	356530	0	187140	716990	950380
O94788	>O94788|AL1A2_HUMAN Retinal dehydrogenase 2 |Homo sapiens	20	16	13	11	21	18	13	9	16	15	17	12	20	16	9	8	123565860	54940730	21696190	12738800	135495670	72590130	34019630	20042640	68360550	55424420	26869660	13430580	106143030	66727210	18284000	9303850
Q96BD5	>Q96BD5|PF21A_HUMAN PHD finger protein 21A |Homo sapiens	2	2	1	1	2	1	1	1	2	1	1	1	2	0	0	1	2037380	2019220	655620	506360	725080	171420	531180	285110	2166120	1662900	1093700	392150	3232940	0	0	44484
P28070	>P28070|PSB4_HUMAN Proteasome subunit beta type-4 |Homo sapiens	2	0	0	11	2	3	1	9	1	1	0	10	2	0	0	12	716880	0	0	62974400	2753700	6211170	1992800	45373400	431250	3265500	0	162344900	1242010	0	0	59387150
Q9Y2X7	>Q9Y2X7|GIT1_HUMAN ARF GTPase-activating protein GIT1 |Homo sapiens	3	3	4	4	2	2	5	4	2	4	5	3	3	4	2	4	2070510	2465560	2067702	2696490	1560170	798250	5518190	3134640	1450300	2828710	5526280	3896820	2497250	2538590	1927100	2314970
Q8N163	>Q8N163|K1967_HUMAN Protein KIAA1967 |Homo sapiens	1	5	11	15	2	2	14	15	0	2	15	15	1	3	11	11	787550	4109440	13950070	49622370	966940	2855600	38661340	103319990	0	1018920	31056200	62226090	23906	1328240	24713132	27984560
Q09428	>Q09428|ABCC8_HUMAN ATP-binding cassette sub-family C member 8 |Homo sapiens	0	0	0	0	0	0	0	0	1	0	0	0	0	0	0	0	0	0	0	0	0	0	0	0	25371000	0	0	0	0	0	0	0
O14950;P19105	>O14950|ML12B_HUMAN Myosin regulatory light chain 12B |Homo sapiens;>P19105|ML12A_HUMAN Myosin regulatory light chain 12A |Homo sapiens	3	3	3	4	2	2	2	2	3	3	3	3	3	3	2	2	29665190	28815640	63064000	55383060	22880400	39177000	45360000	60136000	14610980	24444090	77353300	54251660	22753720	28890070	37690100	42993000
CON__P02533;P02533	>P02533 SWISS-PROT:P02533 Tax_Id=9606 Gene_Symbol=KRT14 Keratin, type I cytoskeletal 14;>P02533|K1C14_HUMAN Keratin, type I cytoskeletal 14 |Homo sapiens	1	1	0	1	0	0	0	0	1	1	0	0	0	0	0	0	367240	563280	0	165330	0	0	0	0	320870	569010	0	0	0	0	0	0
Q9Y2V7	>Q9Y2V7|COG6_HUMAN Conserved oligomeric Golgi complex subunit 6 |Homo sapiens	0	2	0	1	1	0	0	0	2	3	0	2	2	2	1	0	0	2107690	0	422260	438380	0	0	0	1785940	5613400	0	1084280	1992910	2028920	1053200	0
P06280	>P06280|AGAL_HUMAN Alpha-galactosidase A |Homo sapiens	3	3	3	3	3	2	2	2	3	2	3	2	3	2	1	2	8524100	6030280	4491810	4631990	5197850	7370900	7265100	4494000	3335380	4078020	5424710	3279850	6854540	6706930	6642700	3894480
Q8WXE1	>Q8WXE1|ATRIP_HUMAN ATR-interacting protein |Homo sapiens	1	2	2	2	0	1	1	1	0	1	1	2	0	0	1	2	160250	1138360	6689110	15674900	0	2341800	2616100	3132600	0	1318700	8779500	15814200	0	0	4342400	11916800
P68032;P68133	>P68032|ACTC_HUMAN Actin, alpha cardiac muscle 1 |Homo sapiens;>P68133|ACTS_HUMAN Actin, alpha skeletal muscle |Homo sapiens	5	5	4	6	5	6	6	6	4	4	5	6	5	5	6	6	757963400	172130600	126518900	493805800	166409900	600001100	669442100	879650400	95350000	197572600	326985990	323526100	619284800	193111600	398399800	358018800
A6ND91	>A6ND91|ASPD_HUMAN Putative L-aspartate dehydrogenase |Homo sapiens	1	0	0	0	0	0	0	0	0	0	0	0	0	0	0	0	468620	0	0	0	0	0	0	0	0	0	0	0	0	0	0	0
P49591	>P49591|SYSC_HUMAN Serine--tRNA ligase, cytoplasmic |Homo sapiens	5	5	4	3	3	5	1	4	5	4	4	3	5	5	1	0	15476500	12660530	5761920	4554900	11747000	8257070	1237200	6875620	11190090	8488790	4624160	1813010	14501030	11267500	1182600	0
P04637	>P04637|P53_HUMAN Cellular tumor antigen p53 |Homo sapiens	12	12	12	11	8	10	12	12	9	10	12	11	11	10	11	10	23916750	26104670	35487000	28782600	10088950	33628530	44338690	34909500	9934250	21408530	50442900	28286400	14931080	22524500	24532060	27004180
Q9UBW7	>Q9UBW7|ZMYM2_HUMAN Zinc finger MYM-type protein 2 |Homo sapiens	12	16	10	7	13	13	9	7	12	14	10	7	13	11	10	3	14070530	38480120	8375460	4029600	20175000	29250890	12280320	6525540	17046880	35763760	10180200	3580620	15554650	26095840	15847760	4482660
Q9BTW9	>Q9BTW9|TBCD_HUMAN Tubulin-specific chaperone D |Homo sapiens	0	1	0	0	2	0	0	1	2	0	0	0	2	0	0	1	0	292920	0	0	2117140	0	0	267660	1382200	0	0	0	1490580	0	0	414810
O14981	>O14981|BTAF1_HUMAN TATA-binding protein-associated factor 172 |Homo sapiens	0	0	0	0	0	0	0	0	1	0	0	0	0	0	0	0	0	0	0	0	0	0	0	0	785200	0	0	0	0	0	0	0
Q07864	>Q07864|DPOE1_HUMAN DNA polymerase epsilon catalytic subunit A |Homo sapiens	5	9	0	0	11	1	3	4	11	9	0	2	9	7	3	0	2151320	8743320	0	0	26004400	1011600	10422190	9227160	14408720	7600550	0	664840	14557930	8008430	2144930	0
Q02809	>Q02809|PLOD1_HUMAN Procollagen-lysine,2-oxoglutarate 5-dioxygenase 1 |Homo sapiens	11	9	9	7	11	9	8	9	10	10	10	9	11	8	8	8	33007780	25265550	8898710	8741490	39461680	28161700	14363320	14592070	30533000	34356300	19847700	10962100	31659180	28248890	22957300	9454490
O15020	>O15020|SPTN2_HUMAN Spectrin beta chain, brain 2 |Homo sapiens	5	10	1	1	11	2	1	4	15	6	1	4	9	7	5	1	2582530	8671310	720820	321300	15307270	1174550	324120	1533380	15425882	6800950	386200	1492530	12327730	6786140	3440010	431360
P61201	>P61201|CSN2_HUMAN COP9 signalosome complex subunit 2 |Homo sapiens	19	17	14	12	20	19	13	13	19	20	15	13	18	19	13	13	203088010	175085950	31015640	29290020	302745700	104102120	58978670	50780420	214047680	188263020	44802320	32481200	234407560	178014400	65338060	20316410
P22234	>P22234|PUR6_HUMAN Multifunctional protein ADE2 |Homo sapiens	64	67	59	58	66	67	62	55	67	68	58	56	66	67	65	52	2021324420	5957534710	723447160	792290258	2828275240	3120699910	2109336500	1154941670	3002731990	6948229810	1334196310	939918171	3196069640	4473637440	2436909924	499306960
Q58FF8	>Q58FF8|H90B2_HUMAN Putative heat shock protein HSP 90-beta 2 |Homo sapiens	0	0	0	0	2	2	1	1	0	0	0	0	0	0	1	1	0	0	0	0	30669600	21705400	17104000	19747000	0	0	0	0	0	0	14982000	9498800
Q96GM5	>Q96GM5|SMRD1_HUMAN SWI/SNF-related matrix-associated actin-dependent regulator of chromatin subfamily D member 1 |Homo sapiens	6	6	9	9	8	7	9	9	6	7	8	8	6	6	9	9	11370500	6775340	30681240	26343240	9974700	14297730	42730800	48299600	8304990	7459790	41575500	32179270	10878260	11297670	32310600	32324710
P52298	>P52298|NCBP2_HUMAN Nuclear cap-binding protein subunit 2 |Homo sapiens	2	2	2	2	2	2	1	1	2	2	2	1	2	1	1	2	5425900	3129700	2108120	1769410	3267200	7521600	1055700	990410	1686480	2121260	1556740	382260	2141900	1294800	1274500	2215810
Q8WU90	>Q8WU90|ZC3HF_HUMAN Zinc finger CCCH domain-containing protein 15 |Homo sapiens	1	1	1	1	1	1	1	0	1	1	1	0	1	1	1	0	1564500	1163000	737850	723420	736190	1394700	1129200	0	842660	780140	837200	0	1506700	1100900	890400	0
P15311;P26038;P35241	>P15311|EZRI_HUMAN Ezrin |Homo sapiens;>P26038|MOES_HUMAN Moesin |Homo sapiens;>P35241|RADI_HUMAN Radixin |Homo sapiens	3	4	4	4	3	4	3	3	2	1	3	3	3	3	4	4	7276400	5750420	3948990	5697840	10456200	20232600	8143200	4362500	788230	1521100	1757860	3349720	3464000	6047100	12140100	6588200
Q9HC16	>Q9HC16|ABC3G_HUMAN DNA dC->dU-editing enzyme APOBEC-3G |Homo sapiens	1	1	1	1	1	1	1	1	1	1	1	0	1	1	1	0	994220	6489900	6134000	3882400	1359200	9099500	8053400	6011600	3948900	4624800	998490	0	602550	4788500	1499000	0
P50502;Q8NFI4	>P50502|F10A1_HUMAN Hsc70-interacting protein |Homo sapiens;>Q8NFI4|F10A5_HUMAN Putative protein FAM10A5 |Homo sapiens	6	5	6	5	5	5	4	4	6	6	5	6	5	5	5	4	26347010	13380700	11148990	8054050	9554950	15970300	11476600	8529070	8555580	10501060	12916400	7802040	23773900	12508000	6224910	2980830
Q01518	>Q01518|CAP1_HUMAN Adenylyl cyclase-associated protein 1 |Homo sapiens	54	53	49	39	57	55	49	45	49	52	47	45	52	49	42	39	1008200020	741497380	247666810	126395670	884422470	962852230	288675040	181873310	651624870	807508010	295716700	134327610	763425326	716948494	313563158	107619920
Q9UPY3	>Q9UPY3|DICER_HUMAN Endoribonuclease Dicer |Homo sapiens	1	1	0	0	2	0	0	0	2	1	0	0	2	0	0	0	208520	215450	0	0	1203130	0	0	0	940750	336080	0	0	921720	0	0	0
Q12931	>Q12931|TRAP1_HUMAN Heat shock protein 75 kDa, mitochondrial |Homo sapiens	3	3	3	2	3	3	3	3	3	3	1	2	4	4	4	2	4420290	3774540	2236570	1764600	4184820	5332000	3763000	3984730	3904960	2490260	393160	1761950	6269880	4747940	3348900	1508580
P09497	>P09497|CLCB_HUMAN Clathrin light chain B |Homo sapiens	11	11	10	9	11	11	6	8	11	10	10	7	11	9	6	5	108214530	45268980	27003890	9191430	47928660	49388870	15989350	8948530	58387526	40923810	20004040	3406552	49105530	43143070	13656080	2534950
Q8TBC4	>Q8TBC4|UBA3_HUMAN NEDD8-activating enzyme E1 catalytic subunit |Homo sapiens	2	1	0	0	2	1	1	1	2	1	0	1	2	1	0	0	2745800	1796600	0	0	5098800	1997300	1010300	1510500	2128000	1891700	0	226580	3175670	1232700	0	0
Q92973	>Q92973|TNPO1_HUMAN Transportin-1 |Homo sapiens	5	5	2	6	6	3	5	6	6	5	1	6	6	6	6	4	6664300	18938720	745430	12337500	26634600	3329190	20672500	27346200	17730000	16210300	310980	19174200	23760500	20387800	32104500	7663700
P55084	>P55084|ECHB_HUMAN Trifunctional enzyme subunit beta, mitochondrial |Homo sapiens	17	19	20	20	16	19	20	19	15	19	20	20	18	19	16	16	71547480	120714690	109467110	115197850	42222400	118324150	147468200	139541480	52945800	110870780	181576500	118017450	70147980	117000490	95843410	69868220
Q9NQX3	>Q9NQX3|GEPH_HUMAN Gephyrin |Homo sapiens	18	18	15	12	18	16	14	9	16	17	18	12	17	18	10	11	117163860	106712430	45636780	23586440	113072590	118481720	50622840	20705450	72139800	99313520	58133570	25277790	104320310	120473620	45276770	19404490
Q7Z392	>Q7Z392|TPC11_HUMAN Trafficking protein particle complex subunit 11 |Homo sapiens	0	2	0	1	2	0	1	1	1	2	0	1	2	2	1	0	0	4974000	0	229950	2118450	0	836300	584320	921700	5883400	0	610070	1464530	2438200	735920	0
Q8NCA5;Q52LJ0	>Q8NCA5|FA98A_HUMAN Protein FAM98A |Homo sapiens;>Q52LJ0|FA98B_HUMAN Protein FAM98B |Homo sapiens	1	1	0	0	1	0	0	0	0	0	0	0	0	0	0	0	1349700	458850	0	0	1704300	0	0	0	0	0	0	0	0	0	0	0
Q15427	>Q15427|SF3B4_HUMAN Splicing factor 3B subunit 4 |Homo sapiens	5	5	5	4	5	4	5	3	3	5	4	3	4	4	5	5	5392140	5018520	4975240	4709960	11293920	34685100	14308900	1944730	2023990	5369040	2153170	2111400	2967708	5111680	17226720	6592150
Q14839	>Q14839|CHD4_HUMAN Chromodomain-helicase-DNA-binding protein 4 |Homo sapiens	18	31	26	27	26	26	30	27	25	30	26	30	24	27	31	25	19616970	213566640	33290540	63911660	61799610	64931070	160294840	111853090	55867230	200990430	45312990	114805670	48415440	125198930	187384704	52831390
P42765	>P42765|THIM_HUMAN 3-ketoacyl-CoA thiolase, mitochondrial |Homo sapiens	3	2	2	0	3	2	0	1	3	1	0	0	3	2	0	0	5323610	1845370	1425930	0	6160060	4773500	0	990530	3501460	919980	0	0	5471870	2599930	0	0
Q9NRL3;Q13033	>Q9NRL3|STRN4_HUMAN Striatin-4 |Homo sapiens;>Q13033|STRN3_HUMAN Striatin-3 |Homo sapiens	1	2	2	1	0	2	2	2	0	1	2	1	1	2	1	2	3063900	11429200	1794160	576070	0	6747200	2516300	802330	0	9089400	6192300	1379000	1936800	7279200	4866600	1252910
P0DI81;P0DI82	>P0DI81|TPC2A_HUMAN Trafficking protein particle complex subunit 2 |Homo sapiens;>P0DI82|TPC2B_HUMAN Trafficking protein particle complex subunit 2 protein TRAPPC2P1 |Homo sapiens	1	1	1	1	1	1	0	0	0	1	1	1	1	1	1	0	1036800	2294300	1206600	606810	582300	3542600	0	0	0	1758800	1513500	772430	600930	1857700	874900	0
Q9UJ83	>Q9UJ83|HACL1_HUMAN 2-hydroxyacyl-CoA lyase 1 |Homo sapiens	3	3	0	0	4	1	0	0	5	3	1	0	4	2	0	0	2461480	2371350	0	0	8956690	430660	0	0	6889170	3840550	270120	0	6064710	2340300	0	0
Q15334	>Q15334|L2GL1_HUMAN Lethal(2) giant larvae protein homolog 1 |Homo sapiens	2	2	0	2	2	0	1	2	2	2	0	1	2	1	2	1	1895120	1867120	0	949890	3273800	0	1064400	2488300	2256190	1860100	0	670320	2445300	610780	1581780	548910
P07437;P68371;Q9BVA1;Q13885;P04350;Q9BUF5	>P07437|TBB5_HUMAN Tubulin beta chain |Homo sapiens;>P68371|TBB4B_HUMAN Tubulin beta-4B chain |Homo sapiens;>Q9BVA1|TBB2B_HUMAN Tubulin beta-2B chain |Homo sapiens;>Q13885|TBB2A_HUMAN Tubulin beta-2A chain |Homo sapiens;>P04350|TBB4A_HUMAN Tubulin beta-4A	1	1	1	1	1	1	1	1	1	1	1	1	1	1	1	1	88088000	156340000	146570000	183020000	96742000	148960000	173690000	235400000	89026000	130810000	221620000	195810000	46523000	111070000	119730000	107970000
REV__Q9NZJ5	>Q9NZJ5|E2AK3_HUMAN Eukaryotic translation initiation factor 2-alpha kinase 3 |Homo sapiens	0	0	0	1	0	1	0	0	0	0	0	1	1	0	0	1	0	0	0	1967000	0	5123700	0	0	0	0	0	4214000	15054000	0	0	2034400
Q32P28	>Q32P28|P3H1_HUMAN Prolyl 3-hydroxylase 1 |Homo sapiens	4	3	4	1	4	3	1	1	3	4	4	0	4	4	2	1	10445050	2797140	1661500	232040	4700000	1937210	411340	209670	3973190	4149330	2333680	0	5935870	3902340	3095900	211250
Q9Y4B6	>Q9Y4B6|VPRBP_HUMAN Protein VPRBP |Homo sapiens	2	5	8	18	1	1	19	19	1	4	9	17	1	4	16	14	1068890	1284106	5510820	27376140	601140	730710	74547350	76288200	237740	1038105	10739900	32074180	437540	2403290	54737456	29357150
P10253	>P10253|LYAG_HUMAN Lysosomal alpha-glucosidase |Homo sapiens	1	1	1	1	1	0	1	0	0	1	1	0	1	0	1	0	1090800	478200	370890	258890	1093100	0	688410	0	0	455990	323510	0	694180	0	358100	0
Q06830	>Q06830|PRDX1_HUMAN Peroxiredoxin-1 |Homo sapiens	35	34	34	29	35	34	31	32	32	29	33	25	34	33	29	32	2222659500	980017660	755926960	480564060	1261562900	1259241500	536394600	472068070	1060797330	629912450	671367590	326462700	1221911190	1063113120	512740680	223429150
Q5UIP0	>Q5UIP0|RIF1_HUMAN Telomere-associated protein RIF1 |Homo sapiens	20	24	13	17	29	11	18	23	29	28	14	20	27	23	21	13	24052430	50385050	9916180	16741740	61184750	18838170	32699530	35390810	53702330	46114190	12743000	17710620	42334800	44934260	42566782	13828160
Q7L5N1	>Q7L5N1|CSN6_HUMAN COP9 signalosome complex subunit 6 |Homo sapiens	16	16	13	12	17	15	13	13	18	16	15	11	17	15	14	12	201261700	167098370	27062760	30518200	194344000	114312330	45461790	43039030	178236600	135502800	50027810	26352020	224331550	194459400	72623190	22853840
Q9NYR9	>Q9NYR9|KBRS2_HUMAN NF-kappa-B inhibitor-interacting Ras-like protein 2 |Homo sapiens	2	2	2	2	2	2	2	2	2	2	2	2	2	2	2	2	7526400	8098300	9308500	4066600	3894320	8918300	9799000	2235490	3829480	4511000	12058400	2967600	4999250	7588800	8030500	2697000
REV__Q9NVE7	>Q9NVE7|PANK4_HUMAN Pantothenate kinase 4 |Homo sapiens	0	0	1	0	0	0	1	0	0	0	0	0	1	0	1	0	0	0	1851900	0	0	0	3066500	0	0	0	0	0	1300800	0	2055600	0
P07900;Q14568;P08238;Q58FF8	>P07900|HS90A_HUMAN Heat shock protein HSP 90-alpha |Homo sapiens;>Q14568|HS902_HUMAN Putative heat shock protein HSP 90-alpha A2 |Homo sapiens;>P08238|HS90B_HUMAN Heat shock protein HSP 90-beta |Homo sapiens;>Q58FF8|H90B2_HUMAN Putative heat shock protein	4	4	4	4	4	5	4	4	4	4	4	4	5	4	4	4	182445300	123858500	66152900	62764710	208130700	190555900	132087200	101722100	138628000	100803800	38547370	52710270	178545900	118459900	133456000	47306700
Q9BT78	>Q9BT78|CSN4_HUMAN COP9 signalosome complex subunit 4 |Homo sapiens	27	28	22	21	27	28	24	23	28	26	25	19	26	26	22	15	372578900	204604800	60656080	33326830	277878250	173053070	74126480	51228150	298850850	196325440	74769910	29438700	292940520	195749780	77815460	19866800
CON__P02769;CON__P02768-1;P02768	>P02769 SWISS-PROT:P02769 (Bos taurus) Bovine serum albumin precursor;>P02768-1 SWISS-PROT:P02768-1 Tax_Id=9606 Gene_Symbol=ALB Isoform 1 of Serum albumin precursor;>P02768|ALBU_HUMAN Serum albumin |Homo sapiens	3	3	3	3	3	3	3	3	3	3	3	2	3	3	3	3	24964800	11602300	10549800	9604500	16576900	24938200	16909900	17668100	6938590	9976800	7628200	6021600	13554240	13343830	10083300	6371530
Q13126	>Q13126|MTAP_HUMAN S-methyl-5-thioadenosine phosphorylase |Homo sapiens	7	7	6	6	8	7	6	6	7	7	6	5	7	6	5	6	32861710	17650170	13840600	6786370	25733060	33068800	17426200	9908370	13827910	15320950	9440880	5064400	18475370	18481700	9109480	6387670
O14802	>O14802|RPC1_HUMAN DNA-directed RNA polymerase III subunit RPC1 |Homo sapiens	3	9	20	37	3	7	37	40	4	6	18	38	5	7	31	37	6406330	6359720	12645810	116766200	3551780	6005030	122666320	243237990	3880920	4309570	15090330	159173080	6731420	4782240	110813050	120811930
Q9BUQ8	>Q9BUQ8|DDX23_HUMAN Probable ATP-dependent RNA helicase DDX23 |Homo sapiens	32	36	46	43	31	35	44	43	25	36	45	44	27	28	31	41	50619330	105791712	165407491	158855812	43948223	119634400	192639530	229750330	29625470	90846660	223426053	200959360	35223160	79685100	122538330	120934970
P11413	>P11413|G6PD_HUMAN Glucose-6-phosphate 1-dehydrogenase |Homo sapiens	7	7	5	5	8	7	5	5	7	7	6	7	7	7	3	2	14226100	10223360	2293050	2799130	18514810	10112070	4479360	4354110	11145710	7574440	3285290	4944800	14853900	12193040	3833150	1189690
O60749	>O60749|SNX2_HUMAN Sorting nexin-2 |Homo sapiens	3	2	3	2	3	3	2	3	3	2	2	1	2	3	2	1	4344170	2744100	1834150	1816530	4898940	4178730	3200420	3561790	2980840	2473130	1409970	863160	3200630	3426890	3059200	937270
P11142;P54652;P11021	>P11142|HSP7C_HUMAN Heat shock cognate 71 kDa protein |Homo sapiens;>P54652|HSP72_HUMAN Heat shock-related 70 kDa protein 2 |Homo sapiens;>P11021|GRP78_HUMAN 78 kDa glucose-regulated protein |Homo sapiens	2	2	2	2	2	2	2	2	2	2	2	2	2	2	2	2	27463200	21551500	19578300	20505900	19890500	34310000	31559900	21975800	13882300	18985300	25975700	18245200	18442100	19394700	25556700	19411100
Q9BV20	>Q9BV20|MTNA_HUMAN Methylthioribose-1-phosphate isomerase |Homo sapiens	1	2	1	1	1	2	1	1	1	2	0	2	2	2	2	2	2259600	1794200	353010	850000	1845900	4314700	140670	1038000	1513000	1634460	0	1026960	2328700	3180000	2011420	1757250
Q7L576	>Q7L576|CYFP1_HUMAN Cytoplasmic FMR1-interacting protein 1 |Homo sapiens	6	4	1	3	9	1	2	4	9	5	2	2	7	6	4	1	4683660	5038370	456300	1613760	23429731	427350	1257180	2318220	17230940	21375600	124545220	912790	12724000	6932200	66575280	569780
Q5SSJ5	>Q5SSJ5|HP1B3_HUMAN Heterochromatin protein 1-binding protein 3 |Homo sapiens	4	4	4	4	4	4	3	3	4	4	4	3	4	3	3	2	13263600	8128580	3072330	2563600	13343320	10502870	4072930	3753910	9975630	6117710	4414340	1845933	10430280	6174800	3885450	1836830
P04181	>P04181|OAT_HUMAN Ornithine aminotransferase, mitochondrial |Homo sapiens	9	8	8	6	9	9	9	9	9	8	8	8	9	8	8	5	36240700	15850350	9544970	5722600	36836500	28930410	19705040	13788920	18790310	9459340	13234950	6644910	31973560	20161670	18190810	5490210
Q15437	>Q15437|SC23B_HUMAN Protein transport protein Sec23B |Homo sapiens	1	1	0	0	1	0	0	1	1	0	0	0	1	1	0	0	317860	250440	0	0	822230	0	0	562210	656860	0	0	0	684970	563120	0	0
P55036	>P55036|PSMD4_HUMAN 26S proteasome non-ATPase regulatory subunit 4 |Homo sapiens	11	12	13	14	10	13	12	13	8	11	13	13	8	10	12	13	48248650	80841540	135713600	158377020	26649110	91115000	148554200	151610300	25120580	70802370	185684400	195502100	34204890	58824140	105524300	118372700
P60891	>P60891|PRPS1_HUMAN Ribose-phosphate pyrophosphokinase 1 |Homo sapiens	3	3	3	3	3	3	2	3	3	3	3	3	3	3	2	1	9301700	4125600	1303780	1328690	6737300	3604620	1530000	2868100	5040800	5741900	3802400	1803940	6852300	5151850	3619320	514200
P49366	>P49366|DHYS_HUMAN Deoxyhypusine synthase |Homo sapiens	4	4	2	2	3	2	1	1	3	3	2	1	4	3	1	0	9491800	3623730	1714090	540170	5922600	1857600	741480	627330	4211800	2460860	1489400	361500	4782370	2483270	1790600	0
P29401	>P29401|TKT_HUMAN Transketolase |Homo sapiens	63	58	52	51	67	61	55	59	65	57	51	50	61	59	48	47	1145005510	649759820	256465720	264409520	1132957100	749997590	517778350	415906360	754505540	534329470	240594138	211920790	973508620	663336160	403360250	138464300
Q13547;Q92769	>Q13547|HDAC1_HUMAN Histone deacetylase 1 |Homo sapiens;>Q92769|HDAC2_HUMAN Histone deacetylase 2 |Homo sapiens	9	11	13	13	11	13	13	13	9	13	14	13	10	10	13	12	58564110	180674400	100647350	67336300	49490790	179102000	160145080	92713130	53585680	150745090	222990070	87681710	58584260	160696220	182812948	58921130
P62879;Q9HAV0	>P62879|GBB2_HUMAN Guanine nucleotide-binding protein G(I)/G(S)/G(T) subunit beta-2 |Homo sapiens;>Q9HAV0|GBB4_HUMAN Guanine nucleotide-binding protein subunit beta-4 |Homo sapiens	2	1	2	2	2	1	2	2	0	0	2	1	1	1	1	2	1910410	970650	1266010	2543950	1280360	2030700	2938100	1631770	0	0	1446370	1852000	1069800	1437500	933190	1517590
Q9NXX6	>Q9NXX6|NSE4A_HUMAN Non-structural maintenance of chromosomes element 4 homolog A |Homo sapiens	2	1	2	1	2	2	0	1	2	2	2	0	2	2	1	0	4322370	2510600	2551470	832170	2403100	2636980	0	964810	3822970	1513050	1557790	0	2917730	1347360	1059100	0
Q9UQE7	>Q9UQE7|SMC3_HUMAN Structural maintenance of chromosomes protein 3 |Homo sapiens	38	35	24	25	39	33	27	27	37	32	24	23	37	31	22	20	120461880	83989000	22702630	28020550	140655520	71445070	45637370	39511130	104848430	92312700	26870760	20652480	109921660	70334140	41035950	15368660
P42704	>P42704|LPPRC_HUMAN Leucine-rich PPR motif-containing protein, mitochondrial |Homo sapiens	9	8	1	3	10	2	4	7	10	8	2	8	10	9	5	3	5675400	8554630	239880	1359940	17369820	2139820	2407910	7078660	12932300	5960070	536190	3728050	13982790	9073850	5125790	909450
Q9UBF2	>Q9UBF2|COPG2_HUMAN Coatomer subunit gamma-2 |Homo sapiens	11	26	9	16	20	12	16	18	18	24	6	17	19	21	16	11	19899520	232599980	9173200	33569460	95993000	33121270	69353470	57791170	111243950	239529790	4857790	51689780	119098230	189951720	94280380	21261450
P62312	>P62312|LSM6_HUMAN U6 snRNA-associated Sm-like protein LSm6 |Homo sapiens	2	2	2	2	1	2	2	1	2	2	2	2	2	2	2	2	4405600	4062000	1329880	1232500	1056800	5924800	4177600	8623500	1913140	3250400	2360600	1043280	2322400	4389400	4523100	3828160
Q9NS73	>Q9NS73|MBIP1_HUMAN MAP3K12-binding inhibitory protein 1 |Homo sapiens	1	2	4	5	1	3	3	5	0	2	4	5	1	0	1	3	324740	730310	3676580	7259760	373130	1666670	3235970	6554810	0	902800	4813330	7978490	368910	0	568130	4447000
Q15018	>Q15018|F175B_HUMAN BRISC complex subunit Abro1 |Homo sapiens	5	4	2	1	5	3	0	1	5	4	2	4	5	4	3	2	7340280	3785790	633890	392480	5922660	2012130	0	824940	7308530	4490920	1126910	1425650	7967110	5162700	1548370	673770
Q567U6	>Q567U6|CCD93_HUMAN Coiled-coil domain-containing protein 93 |Homo sapiens	5	7	6	3	4	3	5	3	5	8	4	1	5	5	3	0	9024510	17799030	5399400	1647910	4440340	3876910	3196430	1088850	8531280	27869450	3571410	324970	9232790	11441280	2705890	0
P84103	>P84103|SRSF3_HUMAN Serine/arginine-rich splicing factor 3 |Homo sapiens	1	1	1	1	1	1	1	1	1	1	1	1	1	1	1	1	3031100	1678600	1794400	1267200	1731900	2564300	2208800	2198500	1464900	1445700	2366000	1125800	2049900	2121200	2448500	811230
Q9BVA1;Q13885	>Q9BVA1|TBB2B_HUMAN Tubulin beta-2B chain |Homo sapiens;>Q13885|TBB2A_HUMAN Tubulin beta-2A chain |Homo sapiens	4	4	4	4	4	4	5	4	4	4	4	4	4	4	4	4	140968720	325359100	373239700	13214200	13749200	21072100	291540200	37100500	138558190	12087100	21551900	20816400	7120750	19547100	17363000	192205800
Q9Y5P6	>Q9Y5P6|GMPPB_HUMAN Mannose-1-phosphate guanyltransferase beta |Homo sapiens	8	8	8	8	6	8	8	8	8	8	8	8	8	8	8	6	17723260	37869390	30563600	19106180	5909610	28502900	75224300	29610300	15087440	32687960	35071200	15476190	16223050	35315930	31778900	8147380
P55735	>P55735|SEC13_HUMAN Protein SEC13 homolog |Homo sapiens	8	8	9	8	9	9	9	8	10	9	11	10	10	8	9	9	76212370	106371310	74799420	54108980	67324560	115584400	135078800	75566100	58640220	84933700	150667200	54838720	62717770	110594500	100960200	54955110
P13674	>P13674|P4HA1_HUMAN Prolyl 4-hydroxylase subunit alpha-1 |Homo sapiens	19	18	20	20	16	18	20	20	19	17	20	18	19	18	20	19	45729850	64023120	66232310	45526550	37106470	89032700	103395180	66026600	27107200	58935760	85962760	36449340	51659452	75170090	72041295	41631610
Q86X55	>Q86X55|CARM1_HUMAN Histone-arginine methyltransferase CARM1 |Homo sapiens	13	14	8	12	12	11	11	13	14	12	9	12	13	11	12	9	93846430	64464020	8149210	24422990	135776900	41548200	36396440	45843460	100872130	56757220	9123460	18725620	90003795	62510690	31962341	15111530
P07737;CON__P02584	>P07737|PROF1_HUMAN Profilin-1 |Homo sapiens;>P02584 SWISS-PROT:P02584 (Bos taurus) Profilin-1	3	3	3	3	3	3	3	3	3	3	3	3	3	3	3	3	18922500	13122300	5962400	4899630	8556400	13547500	5820390	5049980	8222400	9222600	10625300	6896860	11899700	12114700	9285600	2974980
Q8N5L8	>Q8N5L8|CI023_HUMAN Alba-like protein C9orf23 |Homo sapiens	2	1	3	2	1	3	2	2	0	1	2	3	0	1	1	3	1066210	762730	3469730	13878900	654760	5383740	6072860	18542500	0	691310	4291910	13154430	0	220260	3563300	15704300
Q9Y6D6	>Q9Y6D6|BIG1_HUMAN Brefeldin A-inhibited guanine nucleotide-exchange protein 1 |Homo sapiens	1	1	0	1	1	0	0	1	2	1	0	1	1	1	0	0	542090	818280	0	780190	2068000	0	0	993580	3018770	1064200	0	570810	1997200	897200	0	0
P53041	>P53041|PPP5_HUMAN Serine/threonine-protein phosphatase 5 |Homo sapiens	5	3	3	2	5	4	2	2	3	3	3	1	6	5	1	4	3767220	979050	1127071	538050	5513160	3946440	1449800	846830	2057950	1345300	1122050	326240	4393739	3768920	941020	1211090
Q14839;Q8TDI0	>Q14839|CHD4_HUMAN Chromodomain-helicase-DNA-binding protein 4 |Homo sapiens;>Q8TDI0|CHD5_HUMAN Chromodomain-helicase-DNA-binding protein 5 |Homo sapiens	12	15	15	15	13	11	14	15	13	15	13	15	13	15	14	10	10093230	102542200	17381480	32771410	28323480	28551020	81306000	61021850	35101810	117950900	20393330	58828500	28253150	70943440	115889200	27263500
CON__ENSEMBL:ENSBTAP00000024146	>ENSEMBL:ENSBTAP00000024146 (Bos taurus) similar to alpha-2-macroglobulin isoform 1	12	10	36	52	8	13	35	54	5	10	44	52	12	13	25	46	17804770	9321690	80515300	536719000	16285420	51619540	131907220	701011010	2706490	5478720	169025200	630991510	14500670	12190210	73537420	351723620
Q16181;Q6ZU15	>Q16181|SEPT7_HUMAN Septin-7 |Homo sapiens;>Q6ZU15|SEP14_HUMAN Septin-14 |Homo sapiens	1	1	1	1	1	1	1	1	1	1	1	1	1	1	1	1	13698000	5801900	5093400	2342400	9455300	8924300	5809000	3599800	6344000	5205400	3060700	1826100	13429000	9658600	4623300	1463300
REV__P41586	>P41586|PACR_HUMAN Pituitary adenylate cyclase-activating polypeptide type I receptor |Homo sapiens	0	0	1	1	0	0	0	1	0	0	1	1	1	1	0	1	0	0	7078800	3229700	0	0	0	6122200	0	0	9032500	3320200	298260	3557800	0	2010700
Q99547	>Q99547|MPH6_HUMAN M-phase phosphoprotein 6 |Homo sapiens	13	13	11	10	11	12	8	9	12	12	9	4	12	10	8	8	71533519	50712031	23441860	11104198	37757250	55275870	18130370	10522370	39131798	49229299	21232890	5736370	65695923	64547400	25010660	11629920
REV__Q3KP66	>Q3KP66|CA106_HUMAN Uncharacterized protein C1orf106 |Homo sapiens	0	0	1	0	0	1	1	0	1	0	0	0	0	0	0	1	0	0	495460	0	0	1845800	6920300	0	2305400	0	0	0	0	0	0	1414500
P00505	>P00505|AATM_HUMAN Aspartate aminotransferase, mitochondrial |Homo sapiens	7	7	6	6	7	6	5	6	6	7	6	7	8	5	7	6	30057100	18075200	8419030	6791450	31543080	33939500	15586760	9576230	16609300	13959130	9461970	8934760	46672600	22567100	31276260	10790030
Q8NBJ5	>Q8NBJ5|GT251_HUMAN Procollagen galactosyltransferase 1 |Homo sapiens	1	1	1	1	1	0	0	1	1	1	1	1	1	2	2	0	743090	490780	481930	639620	696960	0	0	1025800	369880	458120	339480	984870	630040	2287860	1800850	0
Q16658	>Q16658|FSCN1_HUMAN Fascin |Homo sapiens	1	1	1	1	1	0	0	0	1	0	1	0	1	1	0	0	2584200	1024300	1635200	880730	1265800	0	0	0	1273000	0	969230	0	1355700	1281800	0	0
P27694	>P27694|RFA1_HUMAN Replication protein A 70 kDa DNA-binding subunit |Homo sapiens	5	5	4	4	5	5	3	4	4	4	3	4	6	4	1	2	6109790	6121980	2958020	2997430	6357360	6337800	4084020	4582700	4611500	5197380	2337840	3772730	8880940	5109980	1834100	1219200
P05198	>P05198|IF2A_HUMAN Eukaryotic translation initiation factor 2 subunit 1 |Homo sapiens	5	5	4	4	5	5	4	3	5	4	4	4	5	5	4	2	19869300	15773060	5479500	5669120	18250400	15601800	9950390	6512500	12068530	9992850	9138100	5466330	14597610	15953770	8450710	2724680
Q92499	>Q92499|DDX1_HUMAN ATP-dependent RNA helicase DDX1 |Homo sapiens	42	34	37	30	38	36	30	28	37	36	33	29	39	29	29	23	540595140	223853170	97029825	85882770	359750530	239983290	130592770	96694750	348697332	192902710	118233890	55867950	441426604	230421010	9.73302e+07	33473110
CON__P60712;P60709;Q6S8J3;A5A3E0;P0CG38;Q9BYX7;P0CG39;P63261;P68032;P68133	>P60712 SWISS-PROT:P60712 (Bos taurus) Actin, cytoplasmic 1;>P60709|ACTB_HUMAN Actin, cytoplasmic 1 |Homo sapiens;>Q6S8J3|POTEE_HUMAN POTE ankyrin domain family member E |Homo sapiens;>A5A3E0|POTEF_HUMAN POTE ankyrin domain family member F |Homo sapiens;>P	3	3	3	3	3	3	3	3	3	3	3	3	3	3	3	3	53394100	80162500	29069300	55014100	61759500	65609500	94601100	70821700	23361260	48114100	41322700	50049900	54895600	69326300	64423200	47007500
O76071	>O76071|CIAO1_HUMAN Probable cytosolic iron-sulfur protein assembly protein CIAO1 |Homo sapiens	3	2	2	2	2	1	2	2	2	2	2	2	1	2	2	2	5170400	2220800	2832700	2286520	2812400	1408000	3169800	2436190	1579080	1644940	2701100	1413010	1849600	1876020	1891110	1464940
P13797;P13796	>P13797|PLST_HUMAN Plastin-3 |Homo sapiens;>P13796|PLSL_HUMAN Plastin-2 |Homo sapiens	2	1	1	2	2	1	0	0	2	1	1	2	1	1	2	1	5810800	1902600	525010	3483500	2980510	1697500	0	0	5176100	1420000	535320	3722200	1427400	2294000	6405000	2325300
P19388	>P19388|RPAB1_HUMAN DNA-directed RNA polymerases I, II, and III subunit RPABC1 |Homo sapiens	12	19	20	20	9	19	19	19	12	17	20	20	13	18	20	20	27368480	158685570	263994610	193927240	16754350	220071800	316895300	176099730	15833950	114509370	367223770	204236300	24507180	156049840	329581800	206047770
CON__P60712;P60709;Q6S8J3;A5A3E0;P0CG38;P0CG39;P63261;P68032;P68133;P62736;P63267	>P60712 SWISS-PROT:P60712 (Bos taurus) Actin, cytoplasmic 1;>P60709|ACTB_HUMAN Actin, cytoplasmic 1 |Homo sapiens;>Q6S8J3|POTEE_HUMAN POTE ankyrin domain family member E |Homo sapiens;>A5A3E0|POTEF_HUMAN POTE ankyrin domain family member F |Homo sapiens;>P	1	1	1	1	1	1	1	1	1	1	1	1	1	1	1	1	186180000	175760000	35973000	38705000	93617000	161850000	42479000	40707000	155390000	206900000	240460000	197690000	183640000	275500000	254710000	102850000
REV__CON__P13647;REV__P13647	>P13647 SWISS-PROT:P13647 Tax_Id=9606 Gene_Symbol=KRT5 Keratin, type II cytoskeletal 5;>P13647|K2C5_HUMAN Keratin, type II cytoskeletal 5 |Homo sapiens	1	1	1	1	1	1	1	1	1	1	1	1	1	0	1	1	3299500	4913400	4913000	6284600	2953300	7280100	11560000	8886900	1390500	3873400	6568200	7413800	2115500	0	72553	3334100
O60763	>O60763|USO1_HUMAN General vesicular transport factor p115 |Homo sapiens	1	2	1	2	3	1	1	2	3	3	1	3	3	2	1	1	1058200	1938330	132330	1005710	4041310	427370	991680	1421760	4012080	6329810	315940	1447090	3482760	1931430	481600	367060
P60842;Q14240;P38919	>P60842|IF4A1_HUMAN Eukaryotic initiation factor 4A-I |Homo sapiens;>Q14240|IF4A2_HUMAN Eukaryotic initiation factor 4A-II |Homo sapiens;>P38919|IF4A3_HUMAN Eukaryotic initiation factor 4A-III |Homo sapiens	3	3	3	3	3	3	3	3	3	3	3	3	3	3	3	3	38859000	33298600	20230700	25860400	33479400	35649700	36385300	29471000	54050700	32197600	20423600	22513000	44176600	36330000	35427900	12372100
Q13564	>Q13564|ULA1_HUMAN NEDD8-activating enzyme E1 regulatory subunit |Homo sapiens	2	1	1	2	2	0	1	1	2	2	0	1	2	1	1	1	3098030	2606000	405240	947850	13117900	0	690110	852960	4358320	7546800	0	1833500	4220360	3688300	2291700	1201500
P07954	>P07954|FUMH_HUMAN Fumarate hydratase, mitochondrial |Homo sapiens	22	21	17	15	23	20	16	18	21	20	18	13	21	19	10	11	398019600	139182560	46697950	27821960	280204570	135246280	51971800	58789700	244377840	130731930	46595520	22944470	284637200	159053200	35759220	13280250
Q6UWZ7	>Q6UWZ7|F175A_HUMAN BRCA1-A complex subunit Abraxas |Homo sapiens	1	1	0	0	1	0	0	0	1	1	0	0	1	1	0	0	2137500	1205800	0	0	1222200	0	0	0	1030200	1006400	0	0	1185000	700550	0	0
Q9BWU0	>Q9BWU0|NADAP_HUMAN Kanadaptin |Homo sapiens	2	0	2	1	2	1	1	1	2	1	1	1	1	1	1	1	1181045	0	3708820	5359700	1355220	7579600	13051000	6011900	1015431	920570	6141600	6976700	709480	673150	25086000	10575000
Q9NQT5	>Q9NQT5|EXOS3_HUMAN Exosome complex component RRP40 |Homo sapiens	15	15	13	11	15	13	13	12	15	15	15	10	15	15	11	9	183482030	146456320	39538190	33205460	186389540	170688740	93850600	47714040	153612260	199149100	77920350	30063960	192968240	210679380	79176740	25087130
Q13868	>Q13868|EXOS2_HUMAN Exosome complex component RRP4 |Homo sapiens	17	16	14	13	15	16	13	13	17	17	16	10	17	12	12	12	195825700	134761700	34379430	16545950	135015990	136156200	46320550	26440630	103278110	155033000	52296170	16142800	162293500	120801200	57402000	14150940
Q4VC05;Q9BQE9	>Q4VC05|BCL7A_HUMAN B-cell CLL/lymphoma 7 protein family member A |Homo sapiens;>Q9BQE9|BCL7B_HUMAN B-cell CLL/lymphoma 7 protein family member B |Homo sapiens	0	1	1	1	0	0	1	1	0	1	1	1	0	1	1	1	0	436340	2693000	2704300	0	0	3601500	3283700	0	327870	4619300	2373500	0	313140	1896700	2591900
Q9H9E3	>Q9H9E3|COG4_HUMAN Conserved oligomeric Golgi complex subunit 4 |Homo sapiens	2	4	0	2	3	2	1	2	4	6	1	4	4	3	2	1	1098560	9712370	0	2387300	4033850	961880	162920	1818080	5352420	13621580	491170	3622770	7205020	7729700	3661100	298850
P05455	>P05455|LA_HUMAN Lupus La protein |Homo sapiens	16	16	16	16	16	20	14	13	13	15	13	15	14	10	14	12	113246560	63689650	50965500	41866070	95656490	217594700	40680369	32674810	25923490	45037500	34212100	31378460	40487870	26868330	38269389	22036690
Q6NZY4	>Q6NZY4|ZCHC8_HUMAN Zinc finger CCHC domain-containing protein 8 |Homo sapiens	17	17	15	14	16	15	12	10	13	16	16	12	15	14	11	11	59403720	80575740	38856240	21470576	53098020	107900500	47337970	25822330	34196030	83251310	53277020	17573110	43115192	72737160	39620300	15588420
Q92786	>Q92786|PROX1_HUMAN Prospero homeobox protein 1 |Homo sapiens	2	2	2	2	2	2	1	2	2	2	2	2	2	2	1	2	98239600	49026400	28175600	21675680	87018800	72256300	35964000	18928720	55226600	38045900	29356110	18898890	85211200	42427400	32348000	20343300
P51532	>P51532|SMCA4_HUMAN Transcription activator BRG1 |Homo sapiens	5	11	15	25	12	4	27	26	8	12	14	24	8	8	21	25	1766720	9225890	10706930	70218510	9425340	2704990	112182110	165034200	6813930	11894676	10514310	91448170	6230890	5998150	81778140	69243860
Q86VP6;O75155	>Q86VP6|CAND1_HUMAN Cullin-associated NEDD8-dissociated protein 1 |Homo sapiens;>O75155|CAND2_HUMAN Cullin-associated NEDD8-dissociated protein 2 |Homo sapiens	1	1	0	2	2	1	0	1	2	1	0	1	2	2	1	1	1091200	1695000	0	1231740	6143800	567090	0	215690	3141900	1443000	0	560570	3193600	2085360	1888000	755840
O94906	>O94906|PRP6_HUMAN Pre-mRNA-processing factor 6 |Homo sapiens	0	1	0	4	2	0	3	6	1	3	2	6	1	1	3	3	0	505210	0	3287890	856750	0	2830270	12344900	561930	1623570	438710	6298730	404330	507100	2824350	2675160
O15511	>O15511|ARPC5_HUMAN Actin-related protein 2/3 complex subunit 5 |Homo sapiens	8	7	6	5	7	5	5	5	7	8	6	5	7	7	3	5	113124600	29945240	17766040	9288680	40022700	27553840	21056200	9906430	53684200	25730070	21234600	12225580	65212000	42480170	12180300	6066690
Q5T1J5;Q9Y6H1	>Q5T1J5|CHCH9_HUMAN Putative coiled-coil-helix-coiled-coil-helix domain-containing protein CHCHD2P9, mitochondrial |Homo sapiens;>Q9Y6H1|CHCH2_HUMAN Coiled-coil-helix-coiled-coil-helix domain-containing protein 2, mitochondrial |Homo sapiens	1	1	1	0	1	1	1	0	1	1	1	1	1	1	1	1	3569900	1725600	1300000	0	2027300	3472500	2388100	0	2337300	1884100	1204200	1035000	2091500	2265100	1885500	1391400
P18615	>P18615|NELFE_HUMAN Negative elongation factor E |Homo sapiens	3	2	3	1	2	2	1	2	3	2	1	0	3	2	1	0	3059660	787730	1265540	460140	2204520	2353430	717860	799720	1657190	738140	370250	0	1937040	977950	246220	0
Q9UNS2	>Q9UNS2|CSN3_HUMAN COP9 signalosome complex subunit 3 |Homo sapiens	17	18	6	13	21	10	12	13	18	17	5	12	19	19	12	9	108382990	128367780	4467920	19805980	273633600	26300140	31648190	41245330	242075900	125721500	2732650	25128930	239237100	123950720	38380140	11658310
P11142;P54652;P38646	>P11142|HSP7C_HUMAN Heat shock cognate 71 kDa protein |Homo sapiens;>P54652|HSP72_HUMAN Heat shock-related 70 kDa protein 2 |Homo sapiens;>P38646|GRP75_HUMAN Stress-70 protein, mitochondrial |Homo sapiens	1	1	0	0	0	1	0	0	0	0	1	1	0	1	1	1	3232500	2838800	0	0	0	43714000	0	0	0	0	3218100	20921000	0	14489000	69397000	21325000
P52435	>P52435|RPB11_HUMAN DNA-directed RNA polymerase II subunit RPB11-a |Homo sapiens	2	3	3	3	2	3	3	3	2	3	3	3	2	2	3	3	1753870	14365500	42578000	21838800	759350	16404500	41640000	23515300	1149790	9390700	32758500	15346200	35699	7694800	33248300	19287000
P60842;Q14240	>P60842|IF4A1_HUMAN Eukaryotic initiation factor 4A-I |Homo sapiens;>Q14240|IF4A2_HUMAN Eukaryotic initiation factor 4A-II |Homo sapiens	6	6	6	6	6	6	6	6	6	6	6	6	6	6	6	6	60884500	56248300	29130900	38699300	66272600	53096500	59348800	62201800	58923300	52518100	29749300	39152800	68823600	60641000	47263200	23989100
Q9Y5A9	>Q9Y5A9|YTHD2_HUMAN YTH domain family protein 2 |Homo sapiens	1	1	1	1	1	1	1	1	1	1	1	1	1	1	0	1	1715800	2195200	2884400	3579200	1363100	4741800	2666900	3163300	1176400	1779100	3081800	3923000	2295100	2021200	0	3085300
P27816	>P27816|MAP4_HUMAN Microtubule-associated protein 4 |Homo sapiens	3	3	3	3	2	2	2	2	3	2	3	2	3	3	2	2	3818140	2288040	2625150	1884180	1877060	3121100	2552700	2496200	1804130	1199170	2733660	841570	3826290	2419420	2472990	1184670
O95707	>O95707|RPP29_HUMAN Ribonuclease P protein subunit p29 |Homo sapiens	1	1	2	2	0	0	1	2	0	1	1	3	0	0	0	3	285090	2146200	658850	4248490	0	0	1373600	6733100	0	363410	522290	6577390	0	0	0	5106670
Q9ULU4	>Q9ULU4|PKCB1_HUMAN Protein kinase C-binding protein 1 |Homo sapiens	1	0	1	0	0	1	1	1	0	1	1	0	0	0	0	0	726810	0	620720	0	0	617050	351490	276290	0	412210	1066600	0	0	0	0	0
O96019	>O96019|ACL6A_HUMAN Actin-like protein 6A |Homo sapiens	15	18	27	28	11	18	26	27	13	16	27	27	12	19	26	26	40426430	65038100	327893480	403376830	18325090	62262040	437089640	550517400	28319440	41589330	461871200	357470160	38792390	53228560	243580090	292706100
Q13395	>Q13395|TARB1_HUMAN Probable methyltransferase TARBP1 |Homo sapiens	2	3	0	0	3	0	0	1	4	3	0	1	3	3	1	0	1092460	5263800	0	0	6474600	0	0	1251700	10583000	5148600	0	280470	6774000	3844530	955090	0
Q2M389	>Q2M389|WASH7_HUMAN WASH complex subunit 7 |Homo sapiens	4	5	0	1	6	0	1	2	7	5	0	2	6	4	4	1	5198280	9561720	0	1017200	12951950	0	821490	1606040	24333040	9224450	0	1531260	19435670	9742900	6569610	764890
Q7Z4G1	>Q7Z4G1|COMD6_HUMAN COMM domain-containing protein 6 |Homo sapiens	4	3	3	3	3	3	2	4	4	4	4	2	4	2	2	1	8002410	10055700	4357000	1527010	4504080	12412900	2558440	2445600	4498680	11221800	4790470	822800	5289000	8345100	1419966	146150
Q12789	>Q12789|TF3C1_HUMAN General transcription factor 3C polypeptide 1 |Homo sapiens	4	25	3	16	21	8	21	24	18	23	4	23	21	20	21	17	2649320	109045120	1156280	20643710	28145550	6785760	49947420	64299120	26079300	81326210	1424080	39448560	28669148	73449320	69574672	18056550
P11940;Q13310;P0CB38	>P11940|PABP1_HUMAN Polyadenylate-binding protein 1 |Homo sapiens;>Q13310|PABP4_HUMAN Polyadenylate-binding protein 4 |Homo sapiens;>P0CB38|PAB4L_HUMAN Polyadenylate-binding protein 4-like |Homo sapiens	0	0	1	1	1	1	1	1	0	0	0	1	0	0	1	1	0	0	634870	981510	342330	1870200	1479000	882440	0	0	0	883470	0	0	1138600	2293500
Q6ZW49	>Q6ZW49|PAXI1_HUMAN PAX-interacting protein 1 |Homo sapiens	0	2	0	1	0	0	1	2	1	2	0	0	0	0	2	0	0	986920	0	567400	0	0	516940	1334250	437180	1521190	0	0	0	0	1398170	0
Q9H9A5	>Q9H9A5|CNOTA_HUMAN CCR4-NOT transcription complex subunit 10 |Homo sapiens	1	4	2	8	4	3	7	9	0	4	5	9	1	5	7	7	484380	3356190	1219690	25566180	3211310	3736970	16158020	21953630	0	2650660	3293750	27157170	390920	3428220	16780080	19374270
Q9NX46	>Q9NX46|ARHL2_HUMAN Poly(ADP-ribose) glycohydrolase ARH3 |Homo sapiens	0	0	0	0	0	1	0	0	0	0	0	0	0	0	0	0	0	0	0	0	0	765930	0	0	0	0	0	0	0	0	0	0
P51991	>P51991|ROA3_HUMAN Heterogeneous nuclear ribonucleoprotein A3 |Homo sapiens	1	1	1	1	1	1	1	1	1	1	1	1	1	1	1	1	1240900	648360	868250	198000	1516900	1992100	1387700	1273400	728600	876630	1211700	461090	843400	1096700	716690	535320
P10515	>P10515|ODP2_HUMAN Dihydrolipoyllysine-residue acetyltransferase component of pyruvate dehydrogenase complex, mitochondrial |Homo sapiens	0	0	0	0	0	0	1	1	0	0	0	1	0	0	0	0	0	0	0	0	0	0	3093200	2029400	0	0	0	2213100	0	0	0	0
Q9BUL9	>Q9BUL9|RPP25_HUMAN Ribonuclease P protein subunit p25 |Homo sapiens	1	2	3	3	0	0	1	3	0	0	3	3	1	0	1	3	811740	921710	2894760	3331530	0	0	878170	4282790	0	0	2736310	2891280	680250	0	799520	5304100
CON__Q0IIK2;CON__Q29443	>Q0IIK2 TREMBL:Q0IIK2 (Bos taurus) Transferrin;>Q29443 SWISS-PROT:Q29443 Serotransferrin - Bos taurus (Bovine).	2	2	2	1	2	2	1	2	2	1	2	1	2	2	0	1	6970100	3715600	2533980	1588300	3346700	3262700	1466900	2162680	2218990	1394500	1010800	497260	2647890	2955730	0	190150
P32929	>P32929|CGL_HUMAN Cystathionine gamma-lyase |Homo sapiens	3	2	1	0	3	1	1	0	3	3	1	1	3	2	1	0	5544100	2784000	425830	0	7833400	647000	512550	0	3703970	1866850	325190	255910	6179800	2845900	724470	0
O43324	>O43324|MCA3_HUMAN Eukaryotic translation elongation factor 1 epsilon-1 |Homo sapiens	1	3	4	6	2	3	4	6	2	3	6	6	2	3	6	6	345590	3785940	4591760	27718990	1218280	4466740	24497900	42747320	951770	4483700	13500650	38936220	925210	5481220	27736600	42010600
Q9P0W2	>Q9P0W2|HM20B_HUMAN SWI/SNF-related matrix-associated actin-dependent regulator of chromatin subfamily E member 1-related |Homo sapiens	2	2	2	2	2	2	2	2	2	2	2	3	2	2	1	1	1659830	1176550	957740	649057	997750	2080250	771540	584380	1046780	1210350	1089180	1070564	1766120	2426100	1096300	515340
Q12904	>Q12904|AIMP1_HUMAN Aminoacyl tRNA synthase complex-interacting multifunctional protein 1 |Homo sapiens	5	13	20	21	3	19	21	22	2	14	19	21	2	12	14	21	2737850	31855346	141742820	200810560	1520650	47611840	162033920	205250090	405230	29625520	173154370	210475668	803730	28424360	98583820	154777190
Q9H9F9	>Q9H9F9|ARP5_HUMAN Actin-related protein 5 |Homo sapiens	1	0	5	6	0	0	5	6	0	0	7	6	0	0	2	5	2809300	0	3379170	10764250	0	0	7927220	15927900	0	0	8951190	13486150	0	0	1723040	12525780
Q2TAY7	>Q2TAY7|SMU1_HUMAN WD40 repeat-containing protein SMU1 |Homo sapiens	4	4	4	4	3	4	2	2	3	3	4	4	3	3	4	3	13148300	5312550	3423950	3514160	5752300	8828500	3493700	2372000	5556400	3132360	2465450	2531540	5456700	5646000	5534840	2587950
Q9UMX0	>Q9UMX0|UBQL1_HUMAN Ubiquilin-1 |Homo sapiens	2	2	3	2	3	3	2	2	2	2	3	2	3	2	3	3	24814100	15312800	13329430	6031000	11338060	21162100	11819800	5190400	11882690	13148600	11965690	6731200	15295620	20657700	8936140	5056660
P43686	>P43686|PRS6B_HUMAN 26S protease regulatory subunit 6B |Homo sapiens	24	25	31	33	20	25	31	39	18	24	32	34	19	25	27	35	150788280	101248050	286641800	657911490	30511130	119595850	285938390	654683070	62585420	122670190	373711590	709963700	42788941	106303530	222025720	456601310
P51553	>P51553|IDH3G_HUMAN Isocitrate dehydrogenase [NAD] subunit gamma, mitochondrial |Homo sapiens	3	4	0	0	3	3	0	1	3	3	1	0	2	3	0	0	8802600	5300510	0	0	6373100	4816700	0	1797800	3933750	3266470	1345000	0	4581600	4410730	0	0
Q15007	>Q15007|FL2D_HUMAN Pre-mRNA-splicing regulator WTAP |Homo sapiens	16	14	13	13	16	13	12	10	16	13	12	9	15	11	5	7	77930640	39588080	20433140	11298120	52661580	42921170	21659590	10406500	56205040	37503690	23511890	8286650	64033700	43903220	9557270	5567680
Q5T200	>Q5T200|ZC3HD_HUMAN Zinc finger CCCH domain-containing protein 13 |Homo sapiens	15	12	12	10	14	13	9	11	12	13	11	9	14	8	8	7	51437140	24524150	14129460	12685410	39308990	35442640	17635120	13348970	26841000	25200370	14800010	13089730	40189050	24530690	46443172	16954680
P48637	>P48637|GSHB_HUMAN Glutathione synthetase |Homo sapiens	7	4	5	5	6	6	3	4	4	5	4	3	5	5	3	0	22221900	9537100	8225600	5857520	16222550	16751600	5337600	5330210	8083130	9809310	5989180	3689020	12974040	12146600	3777070	0
P63208	>P63208|SKP1_HUMAN S-phase kinase-associated protein 1 |Homo sapiens	4	4	4	3	4	4	2	2	3	4	4	3	4	2	3	4	27079800	35727710	22632560	17638400	17478330	33119700	25698000	13618900	14495900	22597060	27701470	18772200	21720400	13001100	16514460	10381460
P63010	>P63010|AP2B1_HUMAN AP-2 complex subunit beta |Homo sapiens	5	4	2	1	6	2	1	4	7	5	1	3	6	6	2	2	9891500	10933300	438980	504470	30847100	1429000	767210	3446070	41382400	13248500	228330	2607470	27206800	16008400	1461010	925150
Q92878	>Q92878|RAD50_HUMAN DNA repair protein RAD50 |Homo sapiens	46	41	30	23	47	36	24	31	46	39	32	28	44	34	30	20	183957880	95510636	25423421	27500070	186875570	68894500	34340970	45955570	146245283	85174370	26294962	25913370	160380620	94951720	58178820	16768580
Q9H981	>Q9H981|ARP8_HUMAN Actin-related protein 8 |Homo sapiens	0	0	0	4	0	1	2	3	0	0	1	4	0	0	2	4	0	0	0	2986680	0	1188900	534940	4760260	0	0	199560	4462000	0	0	1425410	3337870
P14866	>P14866|HNRPL_HUMAN Heterogeneous nuclear ribonucleoprotein L |Homo sapiens	17	17	18	18	16	17	15	15	13	17	18	13	15	17	13	12	108321050	64103110	50690120	40940690	78704310	105893500	70373700	59507360	59081720	57238640	52563970	28603430	92102480	92890620	42395460	15839430
Q71U36;Q13748;Q6PEY2	>Q71U36|TBA1A_HUMAN Tubulin alpha-1A chain |Homo sapiens;>Q13748|TBA3C_HUMAN Tubulin alpha-3C/D chain |Homo sapiens;>Q6PEY2|TBA3E_HUMAN Tubulin alpha-3E chain |Homo sapiens	2	2	2	2	2	2	2	2	2	2	2	2	2	2	2	2	11058200	2085780	17701700	4263500	22088000	4812600	12729200	55511000	5288100	9881400	13278600	43295400	5059000	9623400	3059000	15989400
P11142;P54652;P08107;P11021	>P11142|HSP7C_HUMAN Heat shock cognate 71 kDa protein |Homo sapiens;>P54652|HSP72_HUMAN Heat shock-related 70 kDa protein 2 |Homo sapiens;>P08107|HSP71_HUMAN Heat shock 70 kDa protein 1A/1B |Homo sapiens;>P11021|GRP78_HUMAN 78 kDa glucose-regulated protein	1	0	1	1	1	1	1	1	1	1	1	0	1	1	1	1	5716000	0	151630000	82072000	28689000	313350000	75517000	6072300	256500	94241000	126090000	0	108880000	146920000	169980000	58472000
P29401;P51854	>P29401|TKT_HUMAN Transketolase |Homo sapiens;>P51854|TKTL1_HUMAN Transketolase-like protein 1 |Homo sapiens	1	1	0	1	1	1	1	1	1	1	1	1	1	0	0	1	2955300	1953700	0	1492100	1981000	1930100	643730	2107300	2662700	2156500	375560	618160	2054100	0	0	2110000
A6NL28	>A6NL28|TPM3L_HUMAN Putative tropomyosin alpha-3 chain-like protein |Homo sapiens	1	1	1	1	1	1	1	1	1	1	1	1	1	1	1	1	7228900	6468800	2800800	4250600	5484900	8077700	7329200	3247600	2611000	3094800	4916300	2875600	3220400	5530600	7248900	2909700
Q15907;P62491	>Q15907|RB11B_HUMAN Ras-related protein Rab-11B |Homo sapiens;>P62491|RB11A_HUMAN Ras-related protein Rab-11A |Homo sapiens	2	2	1	1	2	2	1	2	2	1	1	1	2	2	1	2	2013050	1624820	670330	965390	2430710	2291100	2123500	2546890	1568870	1508900	589860	1909600	1682300	2925700	2546600	2375130
O43164	>O43164|PJA2_HUMAN E3 ubiquitin-protein ligase Praja-2 |Homo sapiens	1	1	2	0	1	2	1	1	1	2	2	2	1	2	1	1	573790	968230	1994500	0	639740	1934460	746040	909170	670530	1079460	2529500	1114300	252180	1025500	602170	679050
Q96SB8	>Q96SB8|SMC6_HUMAN Structural maintenance of chromosomes protein 6 |Homo sapiens	1	1	0	0	1	0	0	0	1	1	0	0	1	1	0	0	544900	749350	0	0	856390	0	0	0	1064300	470460	0	0	748680	457570	0	0
Q9Y2I7	>Q9Y2I7|FYV1_HUMAN 1-phosphatidylinositol-3-phosphate 5-kinase |Homo sapiens	0	1	1	1	0	0	2	2	0	1	0	2	0	1	2	2	0	367670	140760	809160	0	0	2612790	2055900	0	273120	0	1560030	0	262300	2859500	890400
P63151	>P63151|2ABA_HUMAN Serine/threonine-protein phosphatase 2A 55 kDa regulatory subunit B alpha isoform |Homo sapiens	2	1	2	1	2	2	1	1	2	2	2	2	2	2	0	1	4762700	1261900	1660170	489350	2997000	4873500	967080	532080	2014920	3103640	1642240	872490	2968000	2254900	0	737550
Q9UJW0	>Q9UJW0|DCTN4_HUMAN Dynactin subunit 4 |Homo sapiens	9	12	30	29	5	17	29	29	5	10	30	28	6	10	24	28	6299840	13138270	152910180	151974500	4033510	21954610	185766230	184155220	1951320	7421040	216506280	144257300	3677870	10396710	91057790	110233710
P31323	>P31323|KAP3_HUMAN cAMP-dependent protein kinase type II-beta regulatory subunit |Homo sapiens	1	1	1	2	0	1	1	1	0	0	1	1	0	1	0	1	463530	222390	1569400	2079960	0	438780	979170	920340	0	0	1612700	1058400	0	242550	0	861780
P28074	>P28074|PSB5_HUMAN Proteasome subunit beta type-5 |Homo sapiens	1	3	5	19	2	3	1	16	0	6	7	17	2	1	7	19	240140	705730	1324460	65380480	1023400	3361970	7782800	57006760	0	3144680	10671870	108697300	900430	487560	6788900	79983270
O94979	>O94979|SC31A_HUMAN Protein transport protein Sec31A |Homo sapiens	16	13	13	9	15	15	12	11	18	13	12	13	16	10	9	4	61071653	33612800	11691570	7953243	44149750	24892100	18621860	15691090	59554790	27810770	14944480	13414010	57785794	24081450	14112830	2114750
Q00610	>Q00610|CLH1_HUMAN Clathrin heavy chain 1 |Homo sapiens	87	95	37	68	99	57	63	72	97	88	18	75	96	90	76	60	701657250	1292760050	34349810	225988860	2471879730	179948570	337711500	470501670	1933505210	1039852830	10500680	298336530	1971138650	970024250	554160250	209503630
Q14683	>Q14683|SMC1A_HUMAN Structural maintenance of chromosomes protein 1A |Homo sapiens	56	51	50	38	52	50	40	43	52	48	47	36	53	45	35	27	203551269	138275270	53712890	40853880	184229180	123793920	79640750	65109180	155187490	138989950	54403510	40968630	195045828	122351037	74675580	26660090
P09429;P26583	>P09429|HMGB1_HUMAN High mobility group protein B1 |Homo sapiens;>P26583|HMGB2_HUMAN High mobility group protein B2 |Homo sapiens	2	2	2	2	2	2	2	2	2	2	2	2	2	2	2	2	7021600	4964800	2977600	3668300	3115050	5790100	5244900	5543700	2268750	2177200	3911100	2523110	2804990	3043500	1997940	2731150
Q9UN86	>Q9UN86|G3BP2_HUMAN Ras GTPase-activating protein-binding protein 2 |Homo sapiens	3	3	3	3	3	4	3	3	3	2	3	1	3	3	2	3	12891980	2801380	2373510	3008890	5112910	23497630	8739200	4838100	1406030	4498620	3586830	1303800	10457050	11664710	696650	4569900
P12956	>P12956|XRCC6_HUMAN X-ray repair cross-complementing protein 6 |Homo sapiens	34	34	35	33	37	36	32	34	33	32	32	29	36	32	33	30	378650040	241819580	98665340	101731560	435644170	212064760	161306230	150832780	265177270	191348540	83339200	98329420	361351450	240517120	179662042	63449110
P29144	>P29144|TPP2_HUMAN Tripeptidyl-peptidase 2 |Homo sapiens	27	26	15	14	30	18	17	19	30	26	16	13	29	27	17	8	97034860	88051270	9568230	14086120	149007660	47959960	26877940	29417750	110340990	74006860	14296730	16010600	111658856	73146700	26734290	5901770
P11217	>P11217|PYGM_HUMAN Glycogen phosphorylase, muscle form |Homo sapiens	2	2	2	2	1	2	2	2	1	2	2	2	1	2	2	2	104916600	108424700	116489000	90077000	20732000	71751000	116370000	90032000	76137000	100304000	134739000	89786000	29044000	55150000	66102000	65228000
Q7L2J0	>Q7L2J0|MEPCE_HUMAN 7SK snRNA methylphosphate capping enzyme |Homo sapiens	12	11	11	6	11	12	8	7	11	11	10	5	11	11	6	4	41497940	29919600	8777904	3868120	37738200	33756400	11595990	10206160	32847130	35238800	11648550	2486640	42677770	39958500	11485670	2846260
Q14157	>Q14157|UBP2L_HUMAN Ubiquitin-associated protein 2-like |Homo sapiens	5	5	6	6	4	6	6	5	4	5	5	4	5	5	3	5	9220740	7251370	8011680	5236890	5984780	10376450	8287030	7445320	4873060	6680800	8982940	5382600	4994867	7874870	4778650	4909870
Q7KZF4	>Q7KZF4|SND1_HUMAN Staphylococcal nuclease domain-containing protein 1 |Homo sapiens	10	10	6	4	10	8	5	7	10	10	7	5	11	10	7	3	17533000	11995260	3077040	3977340	24580490	10352660	6890020	13037960	11999200	9939430	6200630	5865330	18873060	14721730	9562130	2338860
O43290	>O43290|SNUT1_HUMAN U4/U6.U5 tri-snRNP-associated protein 1 |Homo sapiens	3	2	2	2	1	2	1	1	1	1	2	1	2	2	0	1	2313340	1382040	836460	460660	451130	1258150	750760	574550	372040	265360	678260	178740	1011970	1533250	0	335350
P0C0S5;Q71UI9	>P0C0S5|H2AZ_HUMAN Histone H2A.Z |Homo sapiens;>Q71UI9|H2AV_HUMAN Histone H2A.V |Homo sapiens	0	1	1	1	1	1	1	1	0	1	1	1	0	1	1	1	0	349010	1411400	1352400	327370	1468900	4760500	2109400	0	421500	2711000	743300	0	482350	1637500	2428900
Q9P2I0	>Q9P2I0|CPSF2_HUMAN Cleavage and polyadenylation specificity factor subunit 2 |Homo sapiens	18	28	25	22	22	27	27	27	15	28	28	27	20	25	27	20	42164040	232675860	90697880	53764540	50283260	157275600	177622990	119340370	42574300	196456010	153071030	72265870	41606050	172327870	159773039	45234150
Q9NPF5	>Q9NPF5|DMAP1_HUMAN DNA methyltransferase 1-associated protein 1 |Homo sapiens	3	7	17	17	2	8	17	16	3	4	17	15	1	4	14	16	4187880	8057636	61634610	50581140	5111320	11180310	96507640	67204930	2322540	6291630	92496260	47094320	369790	3001200	50332824	64112930
Q06124	>Q06124|PTN11_HUMAN Tyrosine-protein phosphatase non-receptor type 11 |Homo sapiens	1	0	0	1	2	1	1	0	0	1	0	0	1	1	0	0	311430	0	0	305390	1285360	1137400	286890	0	0	446290	0	0	577360	441580	0	0
Q9UKV8;Q9H9G7;Q9UL18	>Q9UKV8|AGO2_HUMAN Protein argonaute-2 |Homo sapiens;>Q9H9G7|AGO3_HUMAN Protein argonaute-3 |Homo sapiens;>Q9UL18|AGO1_HUMAN Protein argonaute-1 |Homo sapiens	0	0	0	0	0	0	0	0	1	0	0	0	0	0	0	0	0	0	0	0	0	0	0	0	1390800	0	0	0	0	0	0	0
Q13018	>Q13018|PLA2R_HUMAN Secretory phospholipase A2 receptor |Homo sapiens	0	1	0	1	0	1	1	1	0	1	1	1	0	1	1	1	0	142650	0	1835600	0	889550	6096300	4207500	0	295820	5220800	1476900	0	432840	1925300	2052000
Q9BWH6	>Q9BWH6|RPAP1_HUMAN RNA polymerase II-associated protein 1 |Homo sapiens	3	5	1	3	4	0	4	2	4	5	0	5	5	4	4	1	1111720	8302280	126490	1975820	4897010	0	3478780	2851520	6364470	10669600	0	3269010	5747200	5696540	7128910	758370
Q8IWJ2	>Q8IWJ2|GCC2_HUMAN GRIP and coiled-coil domain-containing protein 2 |Homo sapiens	1	1	1	0	1	0	1	1	0	1	0	0	1	1	1	0	732820	1250000	2546600	0	842370	0	961230	6823100	0	1056900	0	0	941630	1118500	4681900	0
Q9NW08	>Q9NW08|RPC2_HUMAN DNA-directed RNA polymerase III subunit RPC2 |Homo sapiens	2	2	8	25	2	3	23	25	0	2	11	24	3	0	18	21	477110	719710	2961370	61810240	5306800	3126790	61890530	128290780	0	660560	6570480	91400170	3312220	0	44668690	58514090
P58876;P62807;Q5QNW6;Q93079;Q99877;Q99879;Q99880;Q8N257;Q96A08;P23527;P33778;Q16778;O60814;P57053	>P58876|H2B1D_HUMAN Histone H2B type 1-D |Homo sapiens;>P62807|H2B1C_HUMAN Histone H2B type 1-C/E/F/G/I |Homo sapiens;>Q5QNW6|H2B2F_HUMAN Histone H2B type 2-F |Homo sapiens;>Q93079|H2B1H_HUMAN Histone H2B type 1-H |Homo sapiens;>Q99877|H2B1N_HUMAN Histone	7	7	7	6	6	6	7	5	7	7	7	5	6	5	6	6	33173230	37212000	38730840	29145280	28785640	76273100	81410200	34112250	20784930	41936460	64755210	18305480	23899470	42081820	71583610	33868640
Q9Y535	>Q9Y535|RPC8_HUMAN DNA-directed RNA polymerase III subunit RPC8 |Homo sapiens	1	0	5	5	0	1	5	5	0	1	5	5	0	1	5	4	735450	0	19519820	24096200	0	1318600	24822100	20879200	0	548750	35533500	23009100	0	768780	10653980	9849560
Q56P03	>Q56P03|EAPP_HUMAN E2F-associated phosphoprotein |Homo sapiens	0	3	12	12	0	2	8	11	1	2	12	11	1	1	5	10	0	1218893	45937270	61307470	0	3481830	26062360	72046250	223180	1066128	55064820	54125490	204100	535860	10707890	29741970
Q9H269	>Q9H269|VPS16_HUMAN Vacuolar protein sorting-associated protein 16 homolog |Homo sapiens	2	4	1	1	3	2	3	1	1	4	1	2	3	3	1	1	3571030	9613600	3124700	1966400	5043960	9135830	5425630	1833300	1339600	8097890	3476500	2499970	2823350	4689840	3169100	3190800
Q8IYH5	>Q8IYH5|ZZZ3_HUMAN ZZ-type zinc finger-containing protein 3 |Homo sapiens	1	0	5	3	0	1	3	5	0	1	4	4	0	1	1	5	213500	0	4551030	3619160	0	423810	1772390	4219330	0	287050	2523010	3104340	0	335770	1036200	4819420
CON__P60712;P60709;Q6S8J3;A5A3E0;P0CG38;P63261;P68032;P68133;P62736;P63267	>P60712 SWISS-PROT:P60712 (Bos taurus) Actin, cytoplasmic 1;>P60709|ACTB_HUMAN Actin, cytoplasmic 1 |Homo sapiens;>Q6S8J3|POTEE_HUMAN POTE ankyrin domain family member E |Homo sapiens;>A5A3E0|POTEF_HUMAN POTE ankyrin domain family member F |Homo sapiens;>P	0	1	1	1	1	1	1	1	0	0	0	1	0	0	1	1	0	272470	424940	804020	494020	1219000	6144900	1998700	0	0	0	391630	0	0	999640	958630
Q10570	>Q10570|CPSF1_HUMAN Cleavage and polyadenylation specificity factor subunit 1 |Homo sapiens	9	34	17	26	26	16	29	28	22	32	13	28	20	25	24	24	7748160	191047910	11326139	52186921	48779260	32203410	123204830	87716690	23278240	142543290	8854100	74778790	25266892	86362890	111908010	47409700
O75874	>O75874|IDHC_HUMAN Isocitrate dehydrogenase [NADP] cytoplasmic |Homo sapiens	5	4	5	2	5	5	4	4	3	4	3	3	5	4	3	3	12455040	5380590	4976410	1606400	8009100	14572000	6917410	3622650	3545560	5379040	3441580	2342930	12579240	7913490	3519090	2077580
O43175	>O43175|SERA_HUMAN D-3-phosphoglycerate dehydrogenase |Homo sapiens	45	44	40	42	48	46	44	42	44	42	38	37	45	42	42	36	1952057620	829996040	397555140	357003790	1265805980	929961820	592555020	401455710	1280273030	635725600	378241220	223845080	1314161760	804375320	506802945	173758210
P43034	>P43034|LIS1_HUMAN Platelet-activating factor acetylhydrolase IB subunit alpha |Homo sapiens	2	1	1	2	2	2	1	0	1	1	1	1	1	1	0	0	2564630	697510	577050	726800	2271110	2130380	467510	0	1036600	659230	547860	699420	1139200	1111200	0	0
Q9UQ35	>Q9UQ35|SRRM2_HUMAN Serine/arginine repetitive matrix protein 2 |Homo sapiens	17	18	17	18	20	19	18	19	11	14	16	14	13	10	13	12	48712550	60672480	43476560	46209950	63232570	101398750	119093700	115489920	16301420	32621850	39374820	30388200	18416466	18790600	27301530	16832040
P22087;A6NHQ2	>P22087|FBRL_HUMAN rRNA 2-O-methyltransferase fibrillarin |Homo sapiens;>A6NHQ2|FBLL1_HUMAN rRNA/tRNA 2-O-methyltransferase fibrillarin-like protein 1 |Homo sapiens	1	1	1	1	1	1	1	1	1	1	1	1	1	1	1	1	10135000	7387100	5603400	4986000	4869600	8962200	7933100	7668900	3331900	6805700	10182000	7684100	7013900	7943000	7636200	4742400
Q8NB37	>Q8NB37|PDDC1_HUMAN Parkinson disease 7 domain-containing protein 1 |Homo sapiens	3	3	3	1	3	3	1	1	3	3	3	2	3	3	1	0	17234700	6400040	3270200	1345500	10983800	9883410	2518500	876140	8646480	11628200	4550570	3734680	10291630	6364840	1870800	0
P60174	>P60174|TPIS_HUMAN Triosephosphate isomerase |Homo sapiens	34	34	34	32	33	34	34	31	34	33	33	28	34	35	32	30	652365060	401096160	318108490	249943200	449009290	648486200	455052800	298625200	255501400	317921100	278933650	202083280	404514810	435430800	269055160	158923160
Q16531	>Q16531|DDB1_HUMAN DNA damage-binding protein 1 |Homo sapiens	29	29	21	29	31	21	29	30	32	27	19	29	30	24	27	27	120433220	184017850	24820040	105790450	275300910	47317920	144659650	166915680	256532360	142182030	29409660	133325730	209106540	116514260	124344580	91040960
Q13183	>Q13183|S13A2_HUMAN Solute carrier family 13 member 2 |Homo sapiens	0	1	1	1	1	1	1	1	0	1	1	1	0	0	1	1	0	1996300	19942000	28929000	179980	2782100	2363000	2957300	0	743550	29016000	34228000	0	0	24640000	46736000
P11142;P54652;P17066	>P11142|HSP7C_HUMAN Heat shock cognate 71 kDa protein |Homo sapiens;>P54652|HSP72_HUMAN Heat shock-related 70 kDa protein 2 |Homo sapiens;>P17066|HSP76_HUMAN Heat shock 70 kDa protein 6 |Homo sapiens	3	3	3	3	3	3	3	3	3	3	3	2	3	3	3	3	96645000	108501000	109161000	58350400	83765700	87097000	88605000	73258200	51936600	84753900	97952700	47486300	104408600	85887000	73350100	35887900
Q9BWJ5	>Q9BWJ5|SF3B5_HUMAN Splicing factor 3B subunit 5 |Homo sapiens	4	4	4	4	4	4	4	4	4	4	4	4	4	4	4	3	135300700	71544200	36124800	18586800	56831000	77736100	43732600	12582050	81828600	57832400	21980600	6448670	65355900	81025800	28862900	11626400
P08559	>P08559|ODPA_HUMAN Pyruvate dehydrogenase E1 component subunit alpha, somatic form, mitochondrial |Homo sapiens	3	3	3	3	2	2	3	3	3	3	3	2	3	2	0	0	20171500	7399000	3604560	1868100	5720900	5375800	4433800	3768070	9780100	7483790	3223340	1705730	11710500	5507400	0	0
Q9UNF1	>Q9UNF1|MAGD2_HUMAN Melanoma-associated antigen D2 |Homo sapiens	1	2	1	3	2	2	3	2	2	1	2	3	2	0	2	2	978260	1701800	197690	3065960	1459180	2175640	6066510	2019460	1103950	1239700	2043360	3083450	753805	0	3247000	1223420
O00273	>O00273|DFFA_HUMAN DNA fragmentation factor subunit alpha |Homo sapiens	1	1	1	1	1	1	1	1	1	1	1	1	0	0	1	0	675810	768940	1625800	4632000	1163900	901590	872140	9959600	460990	631660	1908400	2933400	0	0	561570	0
O75446	>O75446|SAP30_HUMAN Histone deacetylase complex subunit SAP30 |Homo sapiens	7	7	8	7	5	7	6	5	4	7	7	6	4	5	7	4	11173190	22306600	20013980	8012180	4276920	23539200	17385700	7554260	3054120	17255480	34997400	8368550	4775277	15377460	21117760	3034490
P25705	>P25705|ATPA_HUMAN ATP synthase subunit alpha, mitochondrial |Homo sapiens	4	6	3	6	5	5	4	4	3	4	3	6	3	4	4	5	1884740	4970110	1475067	2079531	5710010	7721230	5474410	4311900	3602390	1835420	1940330	3072675	3470830	3649610	6499140	2668030
O75175	>O75175|CNOT3_HUMAN CCR4-NOT transcription complex subunit 3 |Homo sapiens	5	9	11	12	4	11	13	11	1	7	9	12	2	5	12	12	5936498	13308970	15967310	29051300	2719660	14721520	43274070	29476120	97728	5460930	31453580	34621020	957150	7807680	2.83641e+07	27067340
P37802	>P37802|TAGL2_HUMAN Transgelin-2 |Homo sapiens	3	3	5	3	4	5	6	3	4	4	4	6	3	3	6	5	7088200	4450000	7049460	5034390	6351240	13470690	11406300	5473940	4241150	3828680	5273320	4919770	5733160	5026460	13528500	8795900
Q06830;P32119	>Q06830|PRDX1_HUMAN Peroxiredoxin-1 |Homo sapiens;>P32119|PRDX2_HUMAN Peroxiredoxin-2 |Homo sapiens	1	1	1	1	1	1	1	1	1	1	1	1	1	1	1	1	358570000	143900000	124990000	82303000	211310000	193080000	177250000	44491000	212410000	137610000	101810000	78169000	198000000	136600000	114350000	58051000
O00303	>O00303|EIF3F_HUMAN Eukaryotic translation initiation factor 3 subunit F |Homo sapiens	9	24	27	25	5	27	28	24	3	23	26	25	5	20	28	25	7696700	477470430	1201359900	597782200	5148310	414435000	1676254100	692353400	2062680	245062510	1859205500	666684100	4082970	325967090	1249610320	495424500
Q9Y262	>Q9Y262|EIF3L_HUMAN Eukaryotic translation initiation factor 3 subunit L |Homo sapiens	3	35	34	40	5	19	40	43	4	31	33	40	5	28	42	40	2277360	201572900	96470860	550888800	3974670	44795920	973884990	902884350	1977220	119845690	97352000	777755200	3639590	103106560	1218971700	487095750
O75369	>O75369|FLNB_HUMAN Filamin-B |Homo sapiens	9	11	3	7	13	5	6	9	13	11	3	6	11	10	3	3	10515040	9730270	1039060	3136640	22680909	6864280	5758300	7704520	12712070	11585290	1113720	3738620	12497850	10398140	3171530	2774620
P52732	>P52732|KIF11_HUMAN Kinesin-like protein KIF11 |Homo sapiens	3	4	3	3	3	4	3	4	5	4	4	3	3	4	3	3	4253010	3708050	1721430	1324880	1626170	2955570	2436280	2065300	6853880	3604620	2289320	1462440	4320300	8083450	5107730	1686760
P51610	>P51610|HCFC1_HUMAN Host cell factor 1 |Homo sapiens	24	22	22	22	23	21	22	18	23	23	24	22	22	22	19	12	84045170	76949600	55770990	30574300	62891670	88939660	62193620	38853050	65482000	86433870	78563850	37238160	65191830	80986160	46672860	22294120
P08238;Q58FF7;Q58FF6;P14625	>P08238|HS90B_HUMAN Heat shock protein HSP 90-beta |Homo sapiens;>Q58FF7|H90B3_HUMAN Putative heat shock protein HSP 90-beta-3 |Homo sapiens;>Q58FF6|H90B4_HUMAN Putative heat shock protein HSP 90-beta 4 |Homo sapiens;>P14625|ENPL_HUMAN Endoplasmin |Homo sa	3	3	2	2	3	3	3	2	3	3	2	2	3	3	2	3	90413800	41182900	17255500	16587300	52112600	61779100	27340000	14961000	30779000	25172500	12706000	13036000	40369400	38872100	37622600	13682700
P11021	>P11021|GRP78_HUMAN 78 kDa glucose-regulated protein |Homo sapiens	43	40	43	38	43	47	42	40	37	38	40	43	38	32	40	45	356125481	276509240	263371350	205402275	286519540	466039280	366787440	260057910	207442042	264894290	347246614	217510629	337735719	348397570	3.14922e+08	179642100
Q96A65	>Q96A65|EXOC4_HUMAN Exocyst complex component 4 |Homo sapiens	6	9	2	4	9	2	7	5	9	10	0	6	9	9	5	4	2103610	16440940	287140	2588250	14694570	998530	6269640	4165080	12775910	21762620	0	4622310	12340670	15700940	13873760	5134630
Q99598	>Q99598|TSNAX_HUMAN Translin-associated protein X |Homo sapiens	14	13	13	10	13	14	12	6	14	11	12	8	15	11	8	7	151119400	59161460	38770830	20194430	102211040	97539900	36253280	22415790	66546370	57390050	35642600	16208830	105889510	57349750	33579370	14356790
Q99996;Q8NEG4	>Q99996|AKAP9_HUMAN A-kinase anchor protein 9 |Homo sapiens;>Q8NEG4|FA83F_HUMAN Protein FAM83F |Homo sapiens	0	0	0	0	0	0	0	0	1	0	0	0	0	0	0	0	0	0	0	0	0	0	0	0	1274800	0	0	0	0	0	0	0
Q15181	>Q15181|IPYR_HUMAN Inorganic pyrophosphatase |Homo sapiens	13	12	12	10	13	13	11	10	12	12	12	11	13	12	9	10	162986200	99909900	71468750	30973400	94989400	104140200	52712480	33819590	68156500	59572600	50906890	37419830	101851100	113119900	39045100	18689180
Q8NBZ0	>Q8NBZ0|IN80E_HUMAN INO80 complex subunit E |Homo sapiens	0	1	4	4	1	1	2	2	0	0	3	4	2	0	0	4	0	10829000	4830280	8225000	2575700	1191700	2087330	7289500	0	0	4699700	7765900	2441684	0	0	14764420
O75528	>O75528|TADA3_HUMAN Transcriptional adapter 3 |Homo sapiens	1	1	1	1	1	1	1	1	1	1	2	1	0	1	1	1	409310	1292600	2315100	3619100	573730	2007700	3902600	4266000	331220	1046200	3735000	4143600	0	1171400	2117300	4477000
Q92598	>Q92598|HS105_HUMAN Heat shock protein 105 kDa |Homo sapiens	17	15	15	14	13	14	12	14	12	14	14	12	14	14	11	11	62550270	38792540	21099030	18558910	54650540	52607210	27402220	22445840	37604540	40021310	24469420	16212190	54921540	44355050	29551600	12842270
Q9Y3F4	>Q9Y3F4|STRAP_HUMAN Serine-threonine kinase receptor-associated protein |Homo sapiens	12	11	12	10	11	11	10	9	9	12	10	8	10	10	7	6	47699220	32687390	24254990	18390350	28193550	40296220	26482400	23679610	22163640	24913010	24950890	14032210	31867210	31348020	14174100	8792970
A6NHR9	>A6NHR9|SMHD1_HUMAN Structural maintenance of chromosomes flexible hinge domain-containing protein 1 |Homo sapiens	2	1	0	0	1	0	0	0	1	1	0	0	2	0	0	0	1482270	661460	0	0	1102100	0	0	0	581890	405620	0	0	2728490	0	0	0
O75182	>O75182|SIN3B_HUMAN Paired amphipathic helix protein Sin3b |Homo sapiens	0	1	0	1	0	0	1	0	0	1	1	1	0	0	0	1	0	464080	0	187050	0	0	911050	0	0	463000	204870	225620	0	0	0	646800
P31943	>P31943|HNRH1_HUMAN Heterogeneous nuclear ribonucleoprotein H |Homo sapiens	13	10	13	12	12	12	11	9	12	11	10	10	11	9	7	9	80588176	32507590	38628030	31727060	41788840	68535600	39537570	32692270	31929750	30463862	34991710	22902804	38504840	38187710	35006900	18936290
Q9UJX3	>Q9UJX3|APC7_HUMAN Anaphase-promoting complex subunit 7 |Homo sapiens	0	3	1	5	1	0	3	5	1	2	3	7	3	3	1	4	0	2151400	153900	3932130	421720	0	1585590	10412440	604130	1247290	1060620	9961470	1116980	1777940	920980	2782970
O75323	>O75323|NIPS2_HUMAN Protein NipSnap homolog 2 |Homo sapiens	1	1	0	1	1	0	0	0	2	1	0	1	1	1	1	0	3207300	1566100	0	473800	2353600	0	0	0	3924700	2118100	0	666510	1736400	2178500	781960	0
Q8TD19	>Q8TD19|NEK9_HUMAN Serine/threonine-protein kinase Nek9 |Homo sapiens	7	5	2	3	6	4	3	5	9	6	3	5	6	4	4	2	9755610	9873260	844810	2691730	19879900	3252410	3484750	6992800	22818650	8474330	1317730	3774710	16502010	3797020	5289880	1265160
Q9H4L5	>Q9H4L5|OSBL3_HUMAN Oxysterol-binding protein-related protein 3 |Homo sapiens	3	3	1	0	2	3	0	0	3	3	2	1	3	3	1	0	3250600	4116390	270340	0	1814020	2725850	0	0	2453810	4085000	775600	379070	3002760	3733090	1124800	0
P04075;P05062;P09972	>P04075|ALDOA_HUMAN Fructose-bisphosphate aldolase A |Homo sapiens;>P05062|ALDOB_HUMAN Fructose-bisphosphate aldolase B |Homo sapiens;>P09972|ALDOC_HUMAN Fructose-bisphosphate aldolase C |Homo sapiens	3	2	3	3	3	3	3	3	3	3	3	2	3	3	3	3	209738400	23740600	61888200	36709610	89857400	100026200	57746060	41655380	92376000	61230300	66206600	27263700	137195800	116522300	46671600	14740650
P62310	>P62310|LSM3_HUMAN U6 snRNA-associated Sm-like protein LSm3 |Homo sapiens	4	3	3	3	3	3	3	3	2	3	3	2	3	3	3	3	14164690	10062770	10829300	5147340	7669700	19037800	13794500	5967100	4773900	7771310	9539200	2867800	6674370	8778120	9342800	4227200
P10809	>P10809|CH60_HUMAN 60 kDa heat shock protein, mitochondrial |Homo sapiens	80	107	121	114	82	117	122	119	69	104	118	112	81	105	119	119	377644820	2758258230	4268236540	2432882480	346876910	3457536570	6714800400	3701131960	242798356	2156734170	6269841970	2602689950	394254068	2589737083	4582425310	2046009590
O43707;Q08043;P35609	>O43707|ACTN4_HUMAN Alpha-actinin-4 |Homo sapiens;>Q08043|ACTN3_HUMAN Alpha-actinin-3 |Homo sapiens;>P35609|ACTN2_HUMAN Alpha-actinin-2 |Homo sapiens	1	1	0	0	1	1	1	1	1	1	0	0	1	1	1	0	973770	1144000	0	0	1682400	761680	668590	494330	1043000	805980	0	0	744610	763550	470500	0
P13693	>P13693|TCTP_HUMAN Translationally-controlled tumor protein |Homo sapiens	2	1	2	2	2	2	2	2	1	1	2	2	2	1	2	2	5841030	2186600	3809970	2637210	5098300	15096300	6592100	3652500	2385300	2278900	2194280	1744360	2829050	745160	9184900	3154640
P00338;Q6ZMR3	>P00338|LDHA_HUMAN L-lactate dehydrogenase A chain |Homo sapiens;>Q6ZMR3|LDH6A_HUMAN L-lactate dehydrogenase A-like 6A |Homo sapiens	2	3	1	1	3	2	2	3	3	2	2	3	3	2	1	1	51283900	31554180	9405200	11616000	48405800	27046390	27092240	2241300	36242590	26536100	7821080	10765260	77247400	37044080	22916000	6107000
O75934	>O75934|SPF27_HUMAN Pre-mRNA-splicing factor SPF27 |Homo sapiens	18	16	16	12	16	13	12	13	13	15	13	11	15	15	10	8	194043500	85836680	44657890	28029770	120216120	87546230	41963990	31134240	73525400	68361040	30211910	15973660	122232200	78199430	48550510	21498070
P35080	>P35080|PROF2_HUMAN Profilin-2 |Homo sapiens	1	1	0	0	1	1	1	1	1	1	0	1	1	1	1	1	1852700	788540	0	0	1835500	584750	331730	231510	672960	393590	0	340630	1119300	938820	807280	194680
P13667	>P13667|PDIA4_HUMAN Protein disulfide-isomerase A4 |Homo sapiens	6	5	4	3	5	6	2	3	5	3	4	1	6	5	3	1	9722700	5048860	2887670	2382040	10047300	13308100	3217500	3369160	5749780	3006040	2951930	734810	10384990	6962770	3845030	677740
Q15022	>Q15022|SUZ12_HUMAN Polycomb protein SUZ12 |Homo sapiens	4	3	0	0	2	1	0	1	5	4	0	1	5	5	0	0	5562470	3393110	0	0	1442690	389090	0	852310	5517540	3799850	0	141490	6832120	5424760	0	0
Q13185;P83916	>Q13185|CBX3_HUMAN Chromobox protein homolog 3 |Homo sapiens;>P83916|CBX1_HUMAN Chromobox protein homolog 1 |Homo sapiens	1	1	1	1	1	1	1	1	1	1	1	1	1	1	1	1	4288500	2355500	2858200	1617300	3877200	3450600	3306000	2059000	1755700	2488400	3807100	2063400	1776000	2017700	1787500	709910
CON__P60712;P60709;Q6S8J3;A5A3E0;P0CG38;Q9BYX7;P0CG39;P63261	>P60712 SWISS-PROT:P60712 (Bos taurus) Actin, cytoplasmic 1;>P60709|ACTB_HUMAN Actin, cytoplasmic 1 |Homo sapiens;>Q6S8J3|POTEE_HUMAN POTE ankyrin domain family member E |Homo sapiens;>A5A3E0|POTEF_HUMAN POTE ankyrin domain family member F |Homo sapiens;>P	4	4	4	4	4	4	4	4	4	4	4	4	3	4	4	4	23654160	25647100	17494440	13957140	17596200	29629200	26955610	22765710	12677380	14829280	26663310	27699210	15990610	20386120	30527000	25529620
Q15843	>Q15843|NEDD8_HUMAN NEDD8 |Homo sapiens	1	1	0	1	1	1	0	1	1	1	0	1	1	1	0	1	2245100	2515800	0	2261300	6707600	2153700	0	2671700	3765200	2147600	0	1318600	3542300	2065300	0	2025600
P18206	>P18206|VINC_HUMAN Vinculin |Homo sapiens	8	4	5	5	9	9	8	7	5	5	3	5	6	7	7	4	20848440	5253600	5835870	4352880	24683800	28021750	12663050	7853680	4775470	6841190	2867510	4572140	12168020	14314580	13119640	3092020
Q8TDD1	>Q8TDD1|DDX54_HUMAN ATP-dependent RNA helicase DDX54 |Homo sapiens	1	1	0	1	1	1	0	0	1	1	0	0	1	1	1	0	686100	446670	0	326420	1648400	685280	0	0	1064300	662070	0	0	1164300	700040	801290	0
P41208	>P41208|CETN2_HUMAN Centrin-2 |Homo sapiens	2	2	2	1	1	2	1	2	1	2	2	1	2	2	0	1	2621500	1496300	1747020	736880	514730	3153700	442880	1112230	679720	1019240	1209360	349060	4195600	6214090	0	256970
Q9Y580	>Q9Y580|RBM7_HUMAN RNA-binding protein 7 |Homo sapiens	5	5	4	3	2	5	2	2	4	3	4	3	4	5	3	2	17686880	25983030	11677800	4065960	5075400	21128800	3926460	1949830	11367800	20482900	15351800	3904900	11927200	25975280	10030270	900590
O43815	>O43815|STRN_HUMAN Striatin |Homo sapiens	6	10	10	6	5	8	7	6	3	9	8	3	5	9	6	5	9450720	22347040	12330580	3793290	8354330	20300810	17469700	7286260	1448020	14695980	12900640	2706550	6494490	13690150	8827520	3295510
P17980	>P17980|PRS6A_HUMAN 26S protease regulatory subunit 6A |Homo sapiens	17	20	36	37	10	23	35	35	13	22	37	37	15	21	23	37	21497350	41399640	157593460	436970580	14974950	72030040	173045350	440931710	11042650	41716683	203582680	464512530	21220580	38982300	103965540	286639890
CON__P00761	>P00761 SWISS-PROT:P00761|TRYP_PIG Trypsin - Sus scrofa (Pig).	3	3	4	4	3	4	3	4	4	3	4	5	3	3	3	5	184900300	218056900	505129000	426885100	91666800	247297040	541901800	557541500	68151280	252410000	379419500	229583000	115067200	134474400	134188940	145408610
P61221	>P61221|ABCE1_HUMAN ATP-binding cassette sub-family E member 1 |Homo sapiens	2	1	2	2	2	2	1	2	1	1	1	2	1	0	1	0	4293600	2445100	1355190	1790350	3393400	2497400	1259300	3580480	2936700	2204900	695770	2254670	4296300	0	1036600	0
P0CAP2;Q9BZD3	>P0CAP2|GRL1A_HUMAN DNA-directed RNA polymerase II subunit GRINL1A |Homo sapiens;>Q9BZD3|GCOM2_HUMAN Putative GRINL1B complex locus protein 2 |Homo sapiens	0	1	3	2	0	1	1	1	0	1	3	1	1	1	2	1	0	868450	3407070	1209980	0	2045400	2699600	1221600	0	755180	4547320	852940	95023	784080	2446860	1645500
Q15542	>Q15542|TAF5_HUMAN Transcription initiation factor TFIID subunit 5 |Homo sapiens	1	2	5	5	1	0	5	5	0	3	5	5	1	2	4	5	322110	1637030	7431560	8886300	256010	0	13112100	13370700	0	2244830	14528180	10961990	207240	1899900	7579080	9051030
P08133	>P08133|ANXA6_HUMAN Annexin A6 |Homo sapiens	4	4	2	3	5	3	2	3	4	4	1	2	4	2	1	3	3488059	4156380	766428	1309660	3999450	629430	679520	1569850	1711630	2244464	449260	921300	3105304	2423060	1170600	1595610
P51531	>P51531|SMCA2_HUMAN Probable global transcription activator SNF2L2 |Homo sapiens	0	0	0	1	1	0	1	1	0	0	1	1	0	0	0	0	0	0	0	294120	2975200	0	603060	723990	0	0	10621000	605840	0	0	0	0
O00232	>O00232|PSD12_HUMAN 26S proteasome non-ATPase regulatory subunit 12 |Homo sapiens	20	24	12	26	23	13	25	27	22	22	15	29	20	20	18	26	30108540	63697070	6033860	114521890	68198090	20556850	88450550	184916060	68839190	72495200	10592180	188769850	70348180	56795340	69253950	107569620
P84090	>P84090|ERH_HUMAN Enhancer of rudimentary homolog |Homo sapiens	7	8	8	6	8	8	8	8	6	7	7	7	7	7	7	6	50125060	40184400	45634360	27525500	73798000	133862500	69495100	43025180	12378560	16997270	23560500	13109610	12364686	21108110	20568310	14942770
O95782;O94973	>O95782|AP2A1_HUMAN AP-2 complex subunit alpha-1 |Homo sapiens;>O94973|AP2A2_HUMAN AP-2 complex subunit alpha-2 |Homo sapiens	10	9	2	5	9	1	3	6	9	8	1	7	9	8	7	3	19842180	35189080	8840300	5588920	32830400	1385700	4937270	8041770	55508210	22483740	21831000	8882160	49454270	22066220	15010910	959880
Q9C086	>Q9C086|IN80B_HUMAN INO80 complex subunit B |Homo sapiens	0	1	4	4	0	1	2	4	0	0	4	4	0	0	1	3	0	152920	7867370	12907850	0	64913	2974120	10067470	0	0	13315980	14404570	0	0	13547	2986880
O95983	>O95983|MBD3_HUMAN Methyl-CpG-binding domain protein 3 |Homo sapiens	17	18	21	20	15	20	19	18	15	20	19	18	14	15	19	21	41988870	182670300	163040580	74130667	28958630	291765000	268537400	84167760	27039630	188560777	276005540	81574590	25800620	145963790	159350818	56459520
O00154	>O00154|BACH_HUMAN Cytosolic acyl coenzyme A thioester hydrolase |Homo sapiens	1	2	2	1	2	2	1	1	1	2	2	1	1	2	1	1	1190000	2611190	4707060	2952200	1238570	2008710	2167900	611610	552410	1673650	8568530	272950	478280	2291980	1001000	528800
Q7Z6Z7	>Q7Z6Z7|HUWE1_HUMAN E3 ubiquitin-protein ligase HUWE1 |Homo sapiens	22	92	36	86	70	33	91	87	65	91	17	93	68	82	92	82	15437740	644028760	26503160	303557930	148624967	43430110	613247680	566556280	138061950	480735980	9417970	446770680	162992989	424186360	771897375	273065579
Q9UKV8	>Q9UKV8|AGO2_HUMAN Protein argonaute-2 |Homo sapiens	0	1	0	0	0	0	1	0	1	1	0	0	1	0	0	0	0	347260	0	0	0	0	3740900	0	542720	314920	0	0	579310	0	0	0
P12532;P17540	>P12532|KCRU_HUMAN Creatine kinase U-type, mitochondrial |Homo sapiens;>P17540|KCRS_HUMAN Creatine kinase S-type, mitochondrial |Homo sapiens	4	4	4	4	4	3	4	4	4	4	4	3	4	3	4	4	138382000	161046000	60704700	21333200	99027700	222862000	93014000	33090300	57970300	97487000	37814700	6191900	28598480	62588808	36673500	8815920
P19174	>P19174|PLCG1_HUMAN 1-phosphatidylinositol-4,5-bisphosphate phosphodiesterase gamma-1 |Homo sapiens	1	1	0	1	1	1	1	1	0	1	0	0	1	1	0	0	940300	760560	0	303610	1498800	991120	869430	845110	0	521180	0	0	1076500	665280	0	0
Q9NXG0	>Q9NXG0|CNTLN_HUMAN Centlein |Homo sapiens	1	0	0	0	0	0	0	0	0	0	0	0	0	0	0	0	17361000	0	0	0	0	0	0	0	0	0	0	0	0	0	0	0
P08559;P29803	>P08559|ODPA_HUMAN Pyruvate dehydrogenase E1 component subunit alpha, somatic form, mitochondrial |Homo sapiens;>P29803|ODPAT_HUMAN Pyruvate dehydrogenase E1 component subunit alpha, testis-specific form, mitochondrial |Homo sapiens	3	2	0	1	3	2	3	1	2	1	1	0	3	3	0	1	8464600	847630	0	304250	2610320	8676900	2401410	720720	361190	228520	149400	0	6532280	5138100	0	1038400
Q9GZT8	>Q9GZT8|NIF3L_HUMAN NIF3-like protein 1 |Homo sapiens	7	5	5	6	6	5	4	4	7	5	5	4	6	5	5	4	98301760	30644700	9703900	10250570	65155700	31257250	15435600	10739200	45193340	29425980	13077410	6382140	77963030	45687600	15003900	3028553
P55072	>P55072|TERA_HUMAN Transitional endoplasmic reticulum ATPase |Homo sapiens	40	107	179	181	35	104	178	177	22	87	171	174	39	87	178	184	57777050	662118160	10249792010	10676830280	41992550	809724630	11240824920	14313414720	11759426	272112440	13119059170	8713707830	89146932	425833440	6693942828	7528250390
O15514	>O15514|RPB4_HUMAN DNA-directed RNA polymerase II subunit RPB4 |Homo sapiens	0	5	7	6	0	2	6	6	0	2	7	5	0	2	4	2	0	6311730	25776280	11707400	0	4896300	22369230	11626370	0	1999920	22555610	9249580	0	4281400	11548910	6294500
P43246	>P43246|MSH2_HUMAN DNA mismatch repair protein Msh2 |Homo sapiens	9	9	4	10	9	6	7	10	9	10	3	7	10	8	8	4	16378960	14230980	3086180	7229920	23893600	5187090	9433460	11779890	25272400	14776060	1780190	4440830	21486120	10630950	7160800	3124210
Q9NYU2	>Q9NYU2|UGGG1_HUMAN UDP-glucose:glycoprotein glucosyltransferase 1 |Homo sapiens	5	5	0	3	6	0	2	4	6	5	1	3	6	5	3	0	4613360	5826990	0	1396810	14263500	0	1188450	3856820	10643000	7033570	401690	1498080	13459100	5301810	2697560	0
P24941;Q14004;Q9NYV4;Q00537;Q00536;Q07002;O94921;Q96Q40;P50750;Q00534;Q00526;P11802;Q00535	>P24941|CDK2_HUMAN Cyclin-dependent kinase 2 |Homo sapiens;>Q14004|CDK13_HUMAN Cyclin-dependent kinase 13 |Homo sapiens;>Q9NYV4|CDK12_HUMAN Cyclin-dependent kinase 12 |Homo sapiens;>Q00537|CDK17_HUMAN Cyclin-dependent kinase 17 |Homo sapiens;>Q00536|CDK16_	1	1	1	1	1	1	1	1	1	1	1	1	1	1	1	1	1528200	1496600	659490	632620	1315300	1148300	1192900	1434800	2557200	1388300	586390	912490	2740500	2147200	1416100	446710
Q9P2D3	>Q9P2D3|HTR5B_HUMAN HEAT repeat-containing protein 5B |Homo sapiens	1	1	1	1	2	1	1	0	3	1	1	1	2	1	0	1	10613000	7429200	3084000	181630	810410	7885000	345970	0	7813990	188800	3457600	2265200	6904320	6310000	0	1350200
P49959	>P49959|MRE11_HUMAN Double-strand break repair protein MRE11A |Homo sapiens	25	22	22	14	23	21	18	16	24	20	20	17	25	23	14	9	194212660	76754460	34111970	18719160	113058280	64755860	33714400	22813260	98041410	58313600	35498730	16948470	147558630	85877140	29441400	8251050
P42695	>P42695|CNDD3_HUMAN Condensin-2 complex subunit D3 |Homo sapiens	4	9	0	4	9	1	3	6	11	9	1	5	11	8	6	1	2967230	20792970	0	1756944	19422420	998740	2285800	7529030	23609114	21245120	160560	2896680	24817780	16673040	9194800	918220
Q9Y285	>Q9Y285|SYFA_HUMAN Phenylalanine--tRNA ligase alpha subunit |Homo sapiens	28	25	24	22	29	25	19	22	25	24	23	21	26	20	22	18	287954810	128644290	66979350	49785320	217774040	164967860	85526100	59906790	157305400	90690640	65611230	35481990	198111350	109698500	70537588	27480560
P82650	>P82650|RT22_HUMAN 28S ribosomal protein S22, mitochondrial |Homo sapiens	0	1	1	1	0	1	1	1	0	0	1	1	0	1	0	1	0	409300	922310	1056100	0	1105900	1285600	1259600	0	0	1182100	891360	0	582830	0	665280
Q96GX9	>Q96GX9|MTNB_HUMAN Probable methylthioribulose-1-phosphate dehydratase |Homo sapiens	5	3	2	4	4	5	3	1	2	3	2	1	4	2	2	1	9493950	2290170	2776300	1282760	5041580	7316150	2613200	528600	1442570	1966420	1853760	101580	4338630	2615300	1046180	482530
Q96RU2	>Q96RU2|UBP28_HUMAN Ubiquitin carboxyl-terminal hydrolase 28 |Homo sapiens	1	1	0	0	1	0	0	1	3	1	0	0	1	1	0	0	416140	891000	0	0	1714200	0	0	583500	2108360	1166900	0	0	1604300	659170	0	0
Q9UHI6	>Q9UHI6|DDX20_HUMAN Probable ATP-dependent RNA helicase DDX20 |Homo sapiens	0	2	0	1	0	0	0	1	1	2	2	2	1	0	1	1	0	439675	0	699590	0	0	0	611240	1433800	219708	386900	1172010	63022	0	2293300	950080
P07900;Q58FG0	>P07900|HS90A_HUMAN Heat shock protein HSP 90-alpha |Homo sapiens;>Q58FG0|HS905_HUMAN Putative heat shock protein HSP 90-alpha A5 |Homo sapiens	4	4	4	4	4	3	4	4	4	3	3	4	4	4	2	3	44249700	31347000	17000800	12289650	45032400	31900400	6488940	8780300	29771800	18503400	7172370	11692170	35125100	31137800	14506600	7015090
Q16740	>Q16740|CLPP_HUMAN Putative ATP-dependent Clp protease proteolytic subunit, mitochondrial |Homo sapiens	2	1	1	1	2	2	2	0	1	2	1	1	2	2	1	1	2455010	1208600	626260	466800	2256600	3331500	1640320	0	1556100	1575000	850900	588180	2354400	1740390	711530	302470
Q16630	>Q16630|CPSF6_HUMAN Cleavage and polyadenylation specificity factor subunit 6 |Homo sapiens	6	6	6	6	6	6	6	6	6	5	6	4	6	4	3	3	37317440	16285650	15168190	9514440	12747210	22617960	14696000	13365820	10851700	10764710	11001700	5785480	24410260	14207530	8188010	865600
P05423	>P05423|RPC4_HUMAN DNA-directed RNA polymerase III subunit RPC4 |Homo sapiens	2	10	20	19	3	8	19	19	2	10	20	19	2	8	18	19	473980	6678740	83073320	89888960	3617910	7267810	100306300	95129600	5398300	5083870	122993000	97086790	430810	4739920	77133710	88266800
O43809	>O43809|CPSF5_HUMAN Cleavage and polyadenylation specificity factor subunit 5 |Homo sapiens	5	5	5	4	5	5	4	4	5	4	4	3	4	5	4	3	27522700	13862390	12022210	5887640	26715400	26379700	13032000	7734500	8867450	8890470	15301300	4056710	17127800	20067470	12553210	4592950
P11940;Q13310	>P11940|PABP1_HUMAN Polyadenylate-binding protein 1 |Homo sapiens;>Q13310|PABP4_HUMAN Polyadenylate-binding protein 4 |Homo sapiens	2	2	2	2	2	2	2	2	1	0	2	1	1	0	2	2	1068950	1108140	955020	3540300	1817570	3515200	3612400	3633000	287060	0	584800	1567600	389290	0	3565000	4255000
Q13435	>Q13435|SF3B2_HUMAN Splicing factor 3B subunit 2 |Homo sapiens	76	72	70	64	78	76	62	51	68	73	72	59	70	71	65	54	1205536960	1287772400	629358680	321643190	883846600	1450309710	671219400	381231410	828395100	1125332620	683548610	214526130	996686870	1218543420	469988707	167414110
P09132	>P09132|SRP19_HUMAN Signal recognition particle 19 kDa protein |Homo sapiens	17	17	16	14	15	16	17	11	17	17	17	13	16	14	18	10	132958520	209907800	85597790	40288760	75550870	263427300	86437080	31679530	78713470	222134200	96758080	30194820	94478592	186217440	125619990	25754940
Q99497	>Q99497|PARK7_HUMAN Protein DJ-1 |Homo sapiens	9	8	8	7	7	7	6	7	8	8	8	7	8	6	5	4	47736700	23711330	21099860	14226220	26586600	47815800	18169400	18562100	18553420	21204330	25485940	9720890	32237870	22843740	14268680	6380270
Q9BTT0	>Q9BTT0|AN32E_HUMAN Acidic leucine-rich nuclear phosphoprotein 32 family member E |Homo sapiens	3	3	3	3	3	3	2	3	3	3	3	3	3	3	2	1	14720800	7129550	5152600	5903500	8946000	8720400	4659600	5969800	5551280	6512200	8654900	3925650	13339200	10029200	4279300	923900
Q7L014	>Q7L014|DDX46_HUMAN Probable ATP-dependent RNA helicase DDX46 |Homo sapiens	1	1	1	1	0	1	1	0	3	1	1	0	1	1	1	1	1098400	497060	303430	449430	0	387480	552470	0	2147370	1015900	406120	0	1054000	874980	855980	328880
P68431;P84243;Q16695;Q71DI3;Q6NXT2	>P68431|H31_HUMAN Histone H3.1 |Homo sapiens;>P84243|H33_HUMAN Histone H3.3 |Homo sapiens;>Q16695|H31T_HUMAN Histone H3.1t |Homo sapiens;>Q71DI3|H32_HUMAN Histone H3.2 |Homo sapiens;>Q6NXT2|H3C_HUMAN Histone H3.3C |Homo sapiens	5	4	4	5	6	5	6	4	4	5	5	5	5	6	5	5	31016100	31712010	14474540	8511120	23573970	71584700	33355610	13553940	25476500	40112930	54600500	15014640	27516960	52665500	49818900	18593800
Q92925	>Q92925|SMRD2_HUMAN SWI/SNF-related matrix-associated actin-dependent regulator of chromatin subfamily D member 2 |Homo sapiens	5	5	11	12	2	5	12	11	3	4	12	12	4	5	11	12	2027770	8689840	26873910	55335710	1261900	2739620	65853300	100646200	3734960	6377090	56358470	45143200	1353090	6492020	51481170	65154900
P23527;P33778;Q16778;Q6DN03;Q6DRA6	>P23527|H2B1O_HUMAN Histone H2B type 1-O |Homo sapiens;>P33778|H2B1B_HUMAN Histone H2B type 1-B |Homo sapiens;>Q16778|H2B2E_HUMAN Histone H2B type 2-E |Homo sapiens;>Q6DN03|H2B2C_HUMAN Putative histone H2B type 2-C |Homo sapiens;>Q6DRA6|H2B2D_HUMAN Putativ	1	1	0	0	1	0	1	1	1	1	1	1	1	1	1	0	4630600	2664600	0	0	1942700	0	545250	173190	1665700	4526400	993590	2262300	3299900	4084200	1905500	0
Q9UK53	>Q9UK53|ING1_HUMAN Inhibitor of growth protein 1 |Homo sapiens	1	1	1	1	0	1	1	1	0	1	2	1	0	1	1	1	553520	3335200	3614300	2101200	0	3846900	5424500	1327800	0	3226100	5041210	2323900	0	2759600	3218300	1418400
P16152	>P16152|CBR1_HUMAN Carbonyl reductase [NADPH] 1 |Homo sapiens	1	0	0	0	0	0	0	0	0	0	0	0	0	0	0	0	1025700	0	0	0	0	0	0	0	0	0	0	0	0	0	0	0
Q9UQ80	>Q9UQ80|PA2G4_HUMAN Proliferation-associated protein 2G4 |Homo sapiens	8	6	8	7	7	8	6	4	8	8	7	6	8	8	6	8	20755220	7475570	6122030	5621490	18330330	17623300	11639370	3364980	15954810	9933860	9480660	4274640	22455750	14479530	10471220	4666610
Q8WUM4	>Q8WUM4|PDC6I_HUMAN Programmed cell death 6-interacting protein |Homo sapiens	4	3	2	2	5	4	2	6	6	3	3	1	6	3	4	1	3593840	1191480	654960	598860	4455090	3409320	2287620	5382620	4695400	1477830	1268650	351350	8403150	1134340	3933130	683090
Q15650	>Q15650|TRIP4_HUMAN Activating signal cointegrator 1 |Homo sapiens	1	0	0	0	2	2	1	0	2	1	2	0	2	2	0	0	2869500	0	0	0	4638600	3771470	1364900	0	2375870	2158700	2133630	0	4618700	3279900	0	0
Q8WWM7	>Q8WWM7|ATX2L_HUMAN Ataxin-2-like protein |Homo sapiens	2	2	2	1	2	2	1	2	2	2	0	1	2	1	1	1	1993120	1367270	744410	311280	1570550	2534700	931850	1099870	1333570	1852250	0	482350	1892880	761300	1032500	682960
Q9Y490;Q9Y4G6	>Q9Y490|TLN1_HUMAN Talin-1 |Homo sapiens;>Q9Y4G6|TLN2_HUMAN Talin-2 |Homo sapiens	3	4	1	2	4	2	2	2	4	3	2	2	4	3	2	0	5963900	4714200	318720	947170	7452160	1958510	2679900	2504500	7596760	4439150	729410	1147780	8444630	3805500	2230490	0
Q9NYB9	>Q9NYB9|ABI2_HUMAN Abl interactor 2 |Homo sapiens	8	8	8	8	8	7	7	7	8	8	8	7	8	7	5	4	32065070	19013100	10809890	10847790	25407160	26681650	11019920	4982350	23539820	22391700	15593100	7690300	30270450	20672800	6961180	8167960
P15927	>P15927|RFA2_HUMAN Replication protein A 32 kDa subunit |Homo sapiens	2	2	2	2	2	3	1	2	2	2	2	2	2	2	1	2	7899800	6807090	5790190	4727040	8610470	10817700	7091300	9000200	5409070	7647600	5803490	4560730	5283700	5481460	3948600	2438960
Q9GZN1	>Q9GZN1|ARP6_HUMAN Actin-related protein 6 |Homo sapiens	1	4	11	10	2	3	11	10	2	4	10	8	1	4	7	10	1774100	4184880	39230710	23523440	2577310	3439840	60238600	31983820	1629760	2633540	65363000	26298100	2099400	3987690	22281600	23109760
Q9Y312	>Q9Y312|CT004_HUMAN Uncharacterized protein C20orf4 |Homo sapiens	1	2	7	14	4	3	12	15	1	0	5	15	2	1	11	14	417990	799880	5346240	71426010	3403680	4875920	50658900	145802100	1850100	0	8121210	91195540	1639800	330780	25260260	62228490
Q92922	>Q92922|SMRC1_HUMAN SWI/SNF complex subunit SMARCC1 |Homo sapiens	34	34	44	44	30	34	45	45	24	30	45	43	29	28	40	41	88441990	76518020	320415310	420422250	85957160	105951370	516813670	647150200	44082120	68553020	441410180	399308380	77725164	67496180	302608300	324310300
P49643	>P49643|PRI2_HUMAN DNA primase large subunit |Homo sapiens	1	1	0	1	4	0	1	1	1	1	0	0	2	1	0	0	1791700	1790700	0	203650	10799180	0	535700	1051400	3973000	1595400	0	0	5344830	1002100	0	0
O15550	>O15550|KDM6A_HUMAN Lysine-specific demethylase 6A |Homo sapiens	0	0	0	0	0	0	1	0	0	0	0	0	0	0	0	0	0	0	0	0	0	0	174030	0	0	0	0	0	0	0	0	0
Q01433	>Q01433|AMPD2_HUMAN AMP deaminase 2 |Homo sapiens	12	15	2	8	15	5	7	10	14	14	3	10	15	14	7	2	22051360	55351980	826130	4234040	61528840	6544600	7488400	55407650	46995390	65633820	2488150	6958250	53933780	46567950	13071760	1875510
P08107;P17066;P48741	>P08107|HSP71_HUMAN Heat shock 70 kDa protein 1A/1B |Homo sapiens;>P17066|HSP76_HUMAN Heat shock 70 kDa protein 6 |Homo sapiens;>P48741|HSP77_HUMAN Putative heat shock 70 kDa protein 7 |Homo sapiens	6	6	6	6	6	6	6	6	6	6	6	6	6	6	6	6	404242000	310562000	233438700	158424500	248340400	293274000	213353900	174891300	274967500	337468000	337804000	170349000	342757400	347686100	199806100	113899600
Q9NPD3	>Q9NPD3|EXOS4_HUMAN Exosome complex component RRP41 |Homo sapiens	16	15	14	12	16	16	12	10	15	15	14	12	16	14	13	10	181149300	138372800	51206470	27413250	121125800	212678550	69288830	30951730	102946850	152142800	58595550	22267313	148355200	128521888	87401000	30516100
Q6ZRS2	>Q6ZRS2|SRCAP_HUMAN Helicase SRCAP |Homo sapiens	1	5	11	21	5	5	26	27	5	4	13	21	5	5	21	21	292320	4530410	114387860	60651900	2981787	325147060	103840190	123993090	1897280	2465420	15425360	61797730	3128936	3662760	71497820	46198410
Q13620	>Q13620|CUL4B_HUMAN Cullin-4B |Homo sapiens	7	7	1	3	8	4	5	6	9	7	1	5	9	8	5	3	9293070	9722610	391080	1459890	36009440	2246220	5937210	11891580	20982460	13411930	339380	6991230	20246220	9568040	4584890	1173910
REV__A7E2V4	>A7E2V4|K0913_HUMAN Zinc finger SWIM domain-containing protein KIAA0913 |Homo sapiens	1	1	1	1	1	2	2	1	1	1	1	1	1	0	1	2	1313300	406160	1889700	786190	794410	8797600	6360300	104110	351690	815560	1079900	269130	208340	0	25650	1960730
P61964;Q86VZ2	>P61964|WDR5_HUMAN WD repeat-containing protein 5 |Homo sapiens;>Q86VZ2|WDR5B_HUMAN WD repeat-containing protein 5B |Homo sapiens	1	2	4	2	1	2	2	1	0	3	2	1	1	2	0	1	734940	3320800	4093840	2398300	359660	3289410	2426000	633170	0	2679840	2516050	555380	29972	1529450	0	718170
Q8WVC0	>Q8WVC0|LEO1_HUMAN RNA polymerase-associated protein LEO1 |Homo sapiens	7	5	7	7	8	7	5	5	7	7	6	1	7	4	3	3	36006100	10439230	7396430	4830960	19917120	18800110	8096620	4757930	13466150	18147120	6513090	808670	20591100	10381220	3295420	1627000
P29692;P24534	>P29692|EF1D_HUMAN Elongation factor 1-delta |Homo sapiens;>P24534|EF1B_HUMAN Elongation factor 1-beta |Homo sapiens	3	3	3	3	2	3	3	2	3	3	3	3	3	1	2	2	238950000	365838000	327553000	192634000	109115000	668101000	542388000	130666000	119832200	274735300	383957000	84756800	128052500	61406	206814000	49159600
P56192	>P56192|SYMC_HUMAN Methionine--tRNA ligase, cytoplasmic |Homo sapiens	14	27	12	35	28	13	34	40	21	26	12	37	20	21	28	34	11327160	64753936	6808880	212555640	56865050	14471190	168688580	340953120	37807100	68868929	9173790	225799260	33986781	44725870	144320040	152259250
Q14974	>Q14974|IMB1_HUMAN Importin subunit beta-1 |Homo sapiens	34	38	27	33	40	30	31	35	44	38	26	34	38	36	35	30	282667990	738275820	52302970	178024150	698195600	189246080	260284300	309669170	727976950	693247940	72893730	290646520	661040720	596887938	689475929	168728530
O43399	>O43399|TPD54_HUMAN Tumor protein D54 |Homo sapiens	2	2	2	2	2	2	1	1	2	2	2	1	2	2	1	2	2252200	1733110	1202280	987510	1507190	3132100	1180900	515910	952710	1348980	1919550	505940	1095670	1345650	432790	797180
Q8WXX5	>Q8WXX5|DNJC9_HUMAN DnaJ homolog subfamily C member 9 |Homo sapiens	10	10	10	8	10	10	9	9	10	11	10	7	9	9	9	7	60119700	32321930	20879060	10523530	46001110	58782160	26893400	14269470	30797020	33264340	16995790	9634660	35689140	26473050	21525580	10257900
P04792	>P04792|HSPB1_HUMAN Heat shock protein beta-1 |Homo sapiens	3	4	4	4	4	4	4	4	3	4	4	4	3	4	4	4	7330400	9026560	10459950	9571840	4832290	14956300	13327790	10918120	4259960	7399540	12394070	6539730	5213830	7542210	7960090	9242460
P55060	>P55060|XPO2_HUMAN Exportin-2 |Homo sapiens	13	14	5	12	14	6	12	14	15	13	1	14	15	13	14	12	38038290	56301010	3253310	21466760	64833900	5054010	34612220	62869400	65430810	41560150	32317000	38401230	64275049	39289020	35805400	33184570
Q9H871;Q96G75	>Q9H871|RMD5A_HUMAN Protein RMD5 homolog A |Homo sapiens;>Q96G75|RMD5B_HUMAN Protein RMD5 homolog B |Homo sapiens	0	0	0	1	0	0	0	1	0	0	0	1	0	0	0	0	0	0	0	2937500	0	0	0	5051100	0	0	0	1383100	0	0	0	0
Q14257	>Q14257|RCN2_HUMAN Reticulocalbin-2 |Homo sapiens	3	2	3	3	2	3	3	2	2	3	3	3	2	2	3	3	5441040	5643900	8532900	9135660	2553500	8133200	11471200	8761800	2932200	5348870	11083500	9119180	4418100	3078670	5984430	5950500
Q9UIA9	>Q9UIA9|XPO7_HUMAN Exportin-7 |Homo sapiens	4	4	0	3	5	1	2	4	7	5	1	3	5	5	3	2	5763310	8626960	0	1596910	19939990	520120	2818900	5817430	19749310	8115680	420370	1906660	18866040	7255950	3702000	1001010
P09661	>P09661|RU2A_HUMAN U2 small nuclear ribonucleoprotein A |Homo sapiens	22	21	18	16	20	21	18	14	17	16	15	12	20	19	15	19	95679990	52628280	32100020	20897767	92872310	120800200	58498120	22713440	45667047	41837260	31168080	14230310	64590774	51492760	45413819	28580900
Q9ULT8	>Q9ULT8|HECD1_HUMAN E3 ubiquitin-protein ligase HECTD1 |Homo sapiens	19	21	2	8	23	2	5	11	23	20	1	10	25	18	10	3	20197570	27147890	932420	3115820	58783940	1915350	3581660	8265520	51310550	27242010	263090	6142770	52149420	23037210	12322520	3959790
P11940;Q9H361	>P11940|PABP1_HUMAN Polyadenylate-binding protein 1 |Homo sapiens;>Q9H361|PABP3_HUMAN Polyadenylate-binding protein 3 |Homo sapiens	3	2	4	4	3	4	4	4	1	1	4	4	1	3	4	3	3313400	2734870	7041550	10695120	3804490	9817000	12811980	11813700	1638600	2594000	6280060	10409080	2220700	4463350	9564590	11990600
P31153	>P31153|METK2_HUMAN S-adenosylmethionine synthase isoform type-2 |Homo sapiens	23	21	17	17	24	23	19	17	20	21	17	14	21	19	19	17	487711640	202673700	64917120	42634460	437041900	279918800	72722400	52254880	305133110	176650930	80723390	36566650	330151940	190589820	95052290	31290350
CON__P13645;P13645;CON__P08730-1;CON__Q99456;Q99456;CON__P02533;P02533;CON__P08779;P08779;CON__Q04695;Q04695;CON__A2A4G1;CON__P19012;P19012;CON__Q9QWL7;CON__P19001;CON__P08727;P08727	>P13645 SWISS-PROT:P13645 Tax_Id=9606 Gene_Symbol=KRT10 Keratin, type I cytoskeletal 10;>P13645|K1C10_HUMAN Keratin, type I cytoskeletal 10 |Homo sapiens;>P08730-1 SWISS-PROT:P08730-1 Tax_Id=10090 Gene_Symbol=Krt13 Isoform 1 of Keratin, type I cytoskeletal	1	1	1	1	0	0	1	1	0	0	0	1	0	0	1	1	750570	702960	1377400	2168900	0	0	10625000	5645900	0	0	0	740940	0	0	833170	2441900
Q16576;Q09028	>Q16576|RBBP7_HUMAN Histone-binding protein RBBP7 |Homo sapiens;>Q09028|RBBP4_HUMAN Histone-binding protein RBBP4 |Homo sapiens	12	12	12	12	11	11	12	11	9	11	12	12	12	10	12	9	158034100	333496200	330719300	134393100	111406400	456507000	436271000	121147500	81232400	331648900	453701100	136709500	113085840	211393800	278494700	70783300
O60287	>O60287|NPA1P_HUMAN Nucleolar pre-ribosomal-associated protein 1 |Homo sapiens	2	3	1	1	2	1	2	2	2	3	1	2	3	2	3	1	15694300	8571500	758310	442360	2840800	3127400	2272350	2336300	7736890	7395800	1004300	3962680	13594120	6308120	8518700	703740
P60510	>P60510|PP4C_HUMAN Serine/threonine-protein phosphatase 4 catalytic subunit |Homo sapiens	0	1	1	0	0	0	0	0	1	1	1	0	1	1	0	0	0	434430	264720	0	0	0	0	0	694710	491170	299530	0	4043200	653940	0	0
P08107	>P08107|HSP71_HUMAN Heat shock 70 kDa protein 1A/1B |Homo sapiens	74	73	72	74	73	75	75	71	68	72	74	73	71	68	69	72	2042303310	1647413990	1296476600	1099730130	1536413290	2267852240	1571283310	1266960460	1284973522	1410631860	1709374310	1102436560	1562313926	1764300750	1395861320	862530360
P15531	>P15531|NDKA_HUMAN Nucleoside diphosphate kinase A |Homo sapiens	5	5	3	2	4	5	3	3	5	5	4	1	4	4	4	4	220238890	83908890	60410850	37874700	72473210	110429000	51798700	31709309	68707190	70402260	47504490	8004700	120761850	95636100	46588710	27300700
Q9NSD9	>Q9NSD9|SYFB_HUMAN Phenylalanine--tRNA ligase beta subunit |Homo sapiens	23	23	16	19	25	19	16	18	24	22	16	14	24	19	14	10	156052620	71071410	17545960	24694860	164744800	37975820	27758170	31350500	140577290	69804180	21957090	20052320	164792970	85270510	31712860	10994110
Q9Y2X3	>Q9Y2X3|NOP58_HUMAN Nucleolar protein 58 |Homo sapiens	8	7	8	7	9	6	8	8	8	8	8	6	8	6	6	5	13044830	15456530	6282970	9123440	27798953	7517350	14085280	15053450	20110000	19309480	8779560	13094240	15495730	12634260	12826760	6602540
Q5SRE5	>Q5SRE5|NU188_HUMAN Nucleoporin NUP188 homolog |Homo sapiens	1	1	0	0	2	0	1	2	4	1	0	1	1	1	0	0	970790	1732000	0	0	3420960	0	525090	2303850	6827470	1327600	0	395880	2575400	1407700	0	0
O60826	>O60826|CCD22_HUMAN Coiled-coil domain-containing protein 22 |Homo sapiens	19	25	18	12	20	19	16	15	21	24	19	13	22	22	16	14	33610380	89971520	13055620	8067170	39088880	58969980	31565190	20532350	35675578	118533560	19064040	11622295	49391130	81350900	35847530	11151980
Q9BQ39	>Q9BQ39|DDX50_HUMAN ATP-dependent RNA helicase DDX50 |Homo sapiens	1	1	1	1	1	0	0	0	2	1	1	1	1	1	0	1	659600	443100	165090	146330	704760	0	0	0	1678080	569770	466730	189800	941480	804860	0	327930
Q15046	>Q15046|SYK_HUMAN Lysine--tRNA ligase |Homo sapiens	20	29	27	32	22	24	29	34	20	23	30	33	21	24	28	30	46084430	112114970	76763110	212562620	48689430	87548480	191050560	443937100	24402100	102854150	222128220	259494350	57808589	75884880	131793170	167031590
CON__ENSEMBL:ENSBTAP00000016242;P68363;P68366;Q71U36;Q13748;Q9BQE3	>ENSEMBL:ENSBTAP00000016242 (Bos taurus) similar to alpha-tubulin I isoform 1;>P68363|TBA1B_HUMAN Tubulin alpha-1B chain |Homo sapiens;>P68366|TBA4A_HUMAN Tubulin alpha-4A chain |Homo sapiens;>Q71U36|TBA1A_HUMAN Tubulin alpha-1A chain |Homo sapiens;>Q13748	6	6	6	5	6	6	6	6	5	6	6	6	6	6	6	6	493703100	762890000	797117200	865788700	420555100	541460430	962773100	865801400	295028600	550667900	1130618400	948456500	353537990	587930900	730114300	574249200
Q13620;Q13619	>Q13620|CUL4B_HUMAN Cullin-4B |Homo sapiens;>Q13619|CUL4A_HUMAN Cullin-4A |Homo sapiens	3	3	3	4	4	0	4	3	4	2	2	3	3	2	2	3	6492080	3284350	922890	2191100	14865300	0	4774040	8043300	15774500	2393990	915090	7896980	12511300	2430970	2558600	1731590
Q8WV22	>Q8WV22|NSE1_HUMAN Non-structural maintenance of chromosomes element 1 homolog |Homo sapiens	1	1	0	0	1	1	0	0	1	1	1	1	1	1	1	0	3363800	1872000	0	0	2287400	637930	0	0	1401800	1308500	525320	392070	2019400	1965100	977510	0
P40938	>P40938|RFC3_HUMAN Replication factor C subunit 3 |Homo sapiens	3	4	1	3	5	4	3	4	5	5	1	4	5	3	3	4	4012200	7032180	132470	2070050	13212900	2797780	2488220	3809720	12089810	6984930	107980	3798230	13565330	4238800	2739250	3173610
P25787	>P25787|PSA2_HUMAN Proteasome subunit alpha type-2 |Homo sapiens	11	10	11	16	11	9	8	16	7	8	10	17	9	8	7	17	25226380	17941030	11803700	248910000	17812800	29903790	16639370	170413810	9921130	22339970	18117220	352293670	15470300	13292760	11187950	190665590
Q9UBB4	>Q9UBB4|ATX10_HUMAN Ataxin-10 |Homo sapiens	1	1	1	1	1	1	1	1	1	1	1	1	1	1	1	1	315610	1165700	268170	1051500	1392600	852770	1662000	2657800	470030	725370	227740	927320	902580	695520	1065600	1119200
Q5PSV4	>Q5PSV4|BRM1L_HUMAN Breast cancer metastasis-suppressor 1-like protein |Homo sapiens	2	3	3	3	2	3	3	3	0	3	4	3	2	2	3	2	2860710	6851250	8305700	4960160	2408710	9269660	15416100	5947340	0	6460930	15566750	3979410	2104020	7291500	6334270	3007460
P35527	>P35527|K1C9_HUMAN Keratin, type I cytoskeletal 9 |Homo sapiens	1	1	1	1	0	1	1	1	1	1	0	1	1	0	1	1	3752500	4347600	2488800	20842000	0	9931400	5854200	11710000	4559700	4800100	0	3217300	379170	0	9081200	11363000
Q9UP83	>Q9UP83|COG5_HUMAN Conserved oligomeric Golgi complex subunit 5 |Homo sapiens	1	3	0	1	1	1	1	3	2	3	1	1	2	2	2	2	143450	6219700	0	217360	484530	434800	1301400	1890650	2091990	6714400	592470	750180	1597833	4534300	4970800	923360
Q4ZHG4	>Q4ZHG4|FNDC1_HUMAN Fibronectin type III domain-containing protein 1 |Homo sapiens	1	1	0	0	1	1	1	0	0	1	1	0	0	0	1	1	494080	633630	0	0	5907000	2513100	4295100	0	0	355730	502820	0	0	0	774880	2044900
O43837	>O43837|IDH3B_HUMAN Isocitrate dehydrogenase [NAD] subunit beta, mitochondrial |Homo sapiens	5	5	4	2	5	5	2	3	4	4	5	4	5	3	1	0	13032100	7778620	1779830	832760	9054540	9081620	1393590	2701310	6157520	6737840	3182900	1709440	11249840	4730640	735940	0
Q15008	>Q15008|PSMD6_HUMAN 26S proteasome non-ATPase regulatory subunit 6 |Homo sapiens	13	15	7	17	16	6	15	17	14	15	8	18	17	15	13	17	19133010	49704010	4106390	102184560	57896480	6330400	39259100	189116840	54142430	48764390	3961840	153552800	50133710	48069810	33379420	109591970
P36543	>P36543|VATE1_HUMAN V-type proton ATPase subunit E 1 |Homo sapiens	8	10	9	5	6	10	7	8	5	9	8	8	8	10	9	10	19764060	49977540	25929320	5862580	16644510	65228800	35596400	13290320	8688860	46355250	32194730	9789300	18431200	61099860	31706300	12153740
P50851	>P50851|LRBA_HUMAN Lipopolysaccharide-responsive and beige-like anchor protein |Homo sapiens	2	2	0	0	3	0	0	2	3	2	0	2	2	2	1	0	1278000	2515000	0	0	4701060	0	0	1648550	5693600	1497530	0	935410	4143000	2003840	538780	0
O43257	>O43257|ZNHI1_HUMAN Zinc finger HIT domain-containing protein 1 |Homo sapiens	0	0	2	2	0	0	2	2	0	0	2	2	0	0	1	1	0	0	4672400	2146510	0	0	5077900	2873060	0	0	5263450	1858890	0	0	1389800	1406300
Q16204	>Q16204|CCDC6_HUMAN Coiled-coil domain-containing protein 6 |Homo sapiens	3	2	3	3	4	3	2	3	3	2	3	0	3	3	0	2	4469900	1156380	1881920	1221330	1411028	2164940	1008700	1088920	1770700	1411270	1779520	0	2968860	2532270	0	426729
Q8TEQ6	>Q8TEQ6|GEMI5_HUMAN Gem-associated protein 5 |Homo sapiens	13	14	1	10	16	3	12	13	16	12	1	15	13	11	10	12	11185270	26727950	953440	11759130	40015480	2996560	15966030	23766530	42353980	21613760	271440	20532940	28507280	14943080	13756443	13091000
Q8N7X0	>Q8N7X0|CAN7L_HUMAN Calpain-7-like protein |Homo sapiens	1	1	2	1	0	1	2	2	1	1	1	1	1	1	1	1	7193600	8184600	13627800	5021300	0	14416000	21237000	19726000	3387800	8619300	5436500	3331900	7394800	7219800	2004600	1033600
CON__ENSEMBL:ENSBTAP00000016242;P68363;Q71U36;Q13748;Q6PEY2;Q9BQE3	>ENSEMBL:ENSBTAP00000016242 (Bos taurus) similar to alpha-tubulin I isoform 1;>P68363|TBA1B_HUMAN Tubulin alpha-1B chain |Homo sapiens;>Q71U36|TBA1A_HUMAN Tubulin alpha-1A chain |Homo sapiens;>Q13748|TBA3C_HUMAN Tubulin alpha-3C/D chain |Homo sapiens;>Q6PE	11	12	12	12	10	12	12	12	9	11	12	12	8	12	11	11	227394430	402580820	422328300	429306800	181215940	397863200	579321600	672015300	165196110	283337190	715326600	519633800	170823200	340923640	380269000	344708300
Q12888	>Q12888|TP53B_HUMAN Tumor suppressor p53-binding protein 1 |Homo sapiens	15	14	11	9	15	8	10	10	16	16	14	7	17	14	8	2	43543020	30476110	7998900	6832030	36846970	14759700	13315590	9691610	37026910	47782180	15357240	5092820	48236770	32749240	12525710	1568160
Q9UKY7	>Q9UKY7|CDV3_HUMAN Protein CDV3 homolog |Homo sapiens	1	1	1	1	0	1	0	1	1	0	1	1	1	1	0	0	1507800	818550	1280200	605430	0	1220800	0	1493600	741610	0	1273400	392580	739970	1077700	0	0
P22392	>P22392|NDKB_HUMAN Nucleoside diphosphate kinase B |Homo sapiens	2	2	2	2	2	2	2	2	2	2	2	2	2	2	2	2	81638000	32919000	15170000	7985400	68253000	36456000	18519500	12915200	50376000	29628000	27373000	8870700	52799000	62407000	17969600	8785200
Q8NBS9	>Q8NBS9|TXND5_HUMAN Thioredoxin domain-containing protein 5 |Homo sapiens	3	3	4	3	2	1	3	3	1	3	5	2	1	2	2	1	4572910	2733460	2453950	1899000	1844470	1677700	2208430	2356210	1119900	1957460	2973710	1549550	2384000	2904590	1411930	352110
P61289	>P61289|PSME3_HUMAN Proteasome activator complex subunit 3 |Homo sapiens	18	17	16	17	18	18	17	19	18	16	18	19	17	19	15	15	322323170	130263710	69652360	50761780	245186900	178231000	106469610	73085830	200103100	140544100	83048340	46017780	232749800	180919230	87591600	46240920
Q9NUQ6	>Q9NUQ6|SPS2L_HUMAN SPATS2-like protein |Homo sapiens	0	1	1	1	0	1	1	1	1	1	1	1	0	0	1	1	0	248530	6963800	1356900	0	5868500	5178200	3846800	4901900	948760	5158500	156420	0	0	80414	1380300
Q13557;Q9UQM7;Q13555	>Q13557|KCC2D_HUMAN Calcium/calmodulin-dependent protein kinase type II subunit delta |Homo sapiens;>Q9UQM7|KCC2A_HUMAN Calcium/calmodulin-dependent protein kinase type II subunit alpha |Homo sapiens;>Q13555|KCC2G_HUMAN Calcium/calmodulin-dependent protein	0	2	2	2	0	2	2	2	0	1	2	2	0	1	2	2	0	2951450	3495210	4159520	0	1506610	5112300	2875700	0	943460	13204800	6164270	0	1289400	7047910	3920200
O95816	>O95816|BAG2_HUMAN BAG family molecular chaperone regulator 2 |Homo sapiens	10	10	11	11	7	11	10	11	7	10	11	11	7	10	10	8	22753760	33219210	46733200	56951500	14090700	57717200	59859030	66325070	12003410	25531910	63470300	51149900	15064760	28839610	36126910	37314300
Q9UFF9	>Q9UFF9|CNOT8_HUMAN CCR4-NOT transcription complex subunit 8 |Homo sapiens	0	2	2	3	1	0	3	4	0	3	3	4	2	3	4	2	0	2379390	1986360	5340200	359910	0	9427200	7742840	0	4407070	5811200	6771210	1152760	4210760	8842640	4037700
Q8NI27	>Q8NI27|THOC2_HUMAN THO complex subunit 2 |Homo sapiens	8	14	3	11	11	4	12	14	11	11	4	12	11	10	10	8	7986970	45750020	2107930	19915950	30922320	7250840	29783750	42545010	22686970	33740840	2037250	21458550	20443763	24062100	30651500	11848650
Q9NZI8	>Q9NZI8|IF2B1_HUMAN Insulin-like growth factor 2 mRNA-binding protein 1 |Homo sapiens	3	3	2	3	2	2	1	3	1	2	3	2	3	0	0	1	1609277	956129	1148220	959612	1034260	2306980	282660	1799350	600260	873360	1298030	833900	1194817	0	0	346290
O43395	>O43395|PRPF3_HUMAN U4/U6 small nuclear ribonucleoprotein Prp3 |Homo sapiens	13	12	16	8	13	16	14	12	9	12	14	12	13	10	12	8	20765660	25802810	30162330	7728140	21942937	55300310	43922400	18046730	9357330	18248570	31526670	9510642	16581278	14443930	27825829	8542402
Q9Y3I0	>Q9Y3I0|RTCB_HUMAN tRNA-splicing ligase RtcB homolog |Homo sapiens	25	25	25	23	25	23	23	24	25	25	23	23	24	22	20	21	551441700	246050390	167602330	81481760	342163900	302058100	152274200	113171880	291216490	180578290	125731730	67462800	375317700	231401300	107814710	55842200
Q7KZ85	>Q7KZ85|SPT6H_HUMAN Transcription elongation factor SPT6 |Homo sapiens	7	8	8	5	7	6	6	3	7	8	7	1	8	7	2	2	11944270	11433560	11087330	3910620	16781510	12682860	8098370	2424730	12108500	13834240	16139010	757350	14726580	14618100	2355240	1618376
P35908;CON__P35908	>P35908|K22E_HUMAN Keratin, type II cytoskeletal 2 epidermal |Homo sapiens;>P35908 SWISS-PROT:P35908 Tax_Id=9606 Gene_Symbol=KRT2 Keratin, type II cytoskeletal 2 epidermal	5	7	7	7	5	7	7	5	5	5	8	6	0	1	5	3	5996090	9678920	7622810	8443550	3448020	12195070	36992500	13382000	3035160	7288650	21992820	5937110	0	291340	9813150	2408120
Q3MHD2	>Q3MHD2|LSM12_HUMAN Protein LSM12 homolog |Homo sapiens	2	2	3	3	3	3	2	2	3	3	3	2	2	3	1	2	4733740	2938110	3328330	2299940	3687570	5854200	2718880	1433060	3025200	3261190	3151440	1262330	2493610	2824280	1049400	2182800
Q8IZP0	>Q8IZP0|ABI1_HUMAN Abl interactor 1 |Homo sapiens	9	7	7	6	6	8	8	5	8	7	7	6	9	6	3	3	51054930	26005880	12336960	5335500	30254600	36406900	14172740	5751610	36199670	27693740	13963430	3897840	37205960	21758800	8779680	6455500
P22392;P15531	>P22392|NDKB_HUMAN Nucleoside diphosphate kinase B |Homo sapiens;>P15531|NDKA_HUMAN Nucleoside diphosphate kinase A |Homo sapiens	4	4	4	4	4	4	4	4	4	4	4	4	4	3	4	4	168457000	87272800	41390000	30989800	113650700	129560200	61836500	34203400	85385300	82841300	71648400	46117600	158978900	118881000	90350600	37525000
REV__Q15149	>Q15149|PLEC_HUMAN Plectin |Homo sapiens	1	0	2	0	2	1	0	1	0	0	0	0	1	1	0	1	324520	0	956610	0	2148600	1423800	0	473930	0	0	0	0	772280	599200	0	86067
Q9C0J8	>Q9C0J8|WDR33_HUMAN pre-mRNA 3 end processing protein WDR33 |Homo sapiens	20	34	33	25	21	31	30	26	16	33	35	26	19	28	28	19	22121310	146658930	93542800	31706400	21229010	128596220	120469770	56185090	11251330	115877090	147513410	37120090	14758110	103938270	82580260	22633780
P16949	>P16949|STMN1_HUMAN Stathmin |Homo sapiens	3	3	3	2	2	2	1	2	3	3	3	2	2	0	1	1	2415550	1600250	2145000	1260970	1961060	4326100	1240100	2056840	1161960	1520370	1103730	194156	794190	0	952060	789100
O60869	>O60869|EDF1_HUMAN Endothelial differentiation-related factor 1 |Homo sapiens	2	1	1	1	1	1	1	1	1	1	1	1	2	0	1	1	1332970	332780	351210	198750	534550	638330	677800	412730	249080	315090	189260	190500	824950	0	7309.6	311720
Q9H583	>Q9H583|HEAT1_HUMAN HEAT repeat-containing protein 1 |Homo sapiens	1	3	1	2	3	0	2	2	4	3	1	2	2	2	2	2	1885800	7804010	30747000	32379500	7425161	0	49855100	52984200	5549360	3404670	28690000	33633500	4735930	2357030	2598550	42841380
Q9UI12	>Q9UI12|VATH_HUMAN V-type proton ATPase subunit H |Homo sapiens	3	8	3	7	5	7	6	7	5	8	3	4	4	8	6	2	6556460	31309500	2137930	6829240	8562770	9235500	16249810	12079160	8743720	29846840	1747440	4514860	7835400	22191910	17325480	4053800
O15371	>O15371|EIF3D_HUMAN Eukaryotic translation initiation factor 3 subunit D |Homo sapiens	13	55	62	64	15	54	63	59	11	48	66	62	16	54	64	62	17191700	567976780	1811623510	1100446910	23549250	580732290	2651324500	1318371720	10191680	409978310	3476943990	1071839150	25181910	459574440	1798089100	810966380
P52294;O60684	>P52294|IMA1_HUMAN Importin subunit alpha-1 |Homo sapiens;>O60684|IMA7_HUMAN Importin subunit alpha-7 |Homo sapiens	1	1	1	1	1	1	1	1	1	1	1	1	1	1	1	1	2804000	5968300	1516200	1516300	3393500	1989800	3053200	2235300	3650300	7827600	3075200	2495100	3560600	4284500	2959300	617470
Q5VST9	>Q5VST9|OBSCN_HUMAN Obscurin |Homo sapiens	0	0	0	0	0	0	0	0	0	0	0	0	0	0	0	1	0	0	0	0	0	0	0	0	0	0	0	0	0	0	0	4837800
P26599	>P26599|PTBP1_HUMAN Polypyrimidine tract-binding protein 1 |Homo sapiens	2	1	1	2	2	1	1	2	2	2	0	2	2	2	2	2	9266800	2024400	943380	4030400	12101800	1151000	762180	8904000	3774060	5082100	0	3702060	7920200	6360100	6175200	3771770
Q92688	>Q92688|AN32B_HUMAN Acidic leucine-rich nuclear phosphoprotein 32 family member B |Homo sapiens	1	1	1	1	1	1	1	1	1	1	1	1	1	1	1	1	12933000	6521700	5470000	3823700	4539100	3046600	5795800	6382700	4771000	5009800	8809100	3015500	5182700	5564100	2133400	1044100
P24534	>P24534|EF1B_HUMAN Elongation factor 1-beta |Homo sapiens	18	18	17	17	18	18	17	16	16	17	18	15	18	16	15	14	1375975000	1486926200	1106960300	654927850	641554220	1729409200	769192700	625662600	619573910	1519626300	1883337280	564526480	759640722	1437232600	820749400	211206420
P23588	>P23588|IF4B_HUMAN Eukaryotic translation initiation factor 4B |Homo sapiens	5	5	5	4	4	5	5	5	4	5	5	5	5	3	3	4	13864290	7270450	5350630	3473480	6387600	10591407	6694800	5251940	4861440	7527600	6860900	3120250	8350820	7272880	4252800	4635970
Q5VTR2;O75150	>Q5VTR2|BRE1A_HUMAN E3 ubiquitin-protein ligase BRE1A |Homo sapiens;>O75150|BRE1B_HUMAN E3 ubiquitin-protein ligase BRE1B |Homo sapiens	3	2	1	0	1	1	2	1	2	2	0	1	2	0	0	1	1118090	195584	253620	0	333940	579370	732924	390220	146534	274026	0	57918	191185	0	0	144850
O43379	>O43379|WDR62_HUMAN WD repeat-containing protein 62 |Homo sapiens	0	2	0	2	1	1	0	2	2	3	0	2	2	2	2	2	0	2750310	0	930360	515870	473760	0	2079660	1003820	2987240	0	1035060	1292330	1940080	2138780	991630
Q13155	>Q13155|AIMP2_HUMAN Aminoacyl tRNA synthase complex-interacting multifunctional protein 2 |Homo sapiens	2	4	7	7	0	5	7	7	1	6	7	7	3	5	7	7	690650	4978570	8763570	51570900	0	6523160	42598500	92057200	1164300	8285290	22662910	58547600	1321845	7771900	31602700	42769500
Q9BW27	>Q9BW27|NUP85_HUMAN Nuclear pore complex protein Nup85 |Homo sapiens	1	5	1	2	2	1	2	2	1	5	0	2	2	4	4	4	1030100	10375780	212970	2535300	814890	587520	4203550	2597280	850680	10667730	0	3036700	642690	6031760	14650200	5455470
Q9BPX3	>Q9BPX3|CND3_HUMAN Condensin complex subunit 3 |Homo sapiens	19	25	9	18	27	17	18	17	26	24	4	18	23	24	19	11	28365630	204982970	5972250	22164775	155692700	24089730	47406810	45909000	162323850	189549063	3626300	34518530	124817691	159448900	83954660	14971780
P67775;P62714;P60510	>P67775|PP2AA_HUMAN Serine/threonine-protein phosphatase 2A catalytic subunit alpha isoform |Homo sapiens;>P62714|PP2AB_HUMAN Serine/threonine-protein phosphatase 2A catalytic subunit beta isoform |Homo sapiens;>P60510|PP4C_HUMAN Serine/threonine-protein p	1	1	1	1	1	1	1	1	1	1	1	0	1	1	1	1	4129500	3855900	1630900	1539000	7331100	1460500	2320500	2353200	5376300	3403500	2237900	0	3174100	2705400	2582400	1090500
P35244	>P35244|RFA3_HUMAN Replication protein A 14 kDa subunit |Homo sapiens	4	5	5	5	5	5	5	5	5	4	5	3	5	5	4	5	25301100	29770500	25576000	26295800	33875500	51996500	44941500	30171400	17694870	23013500	24263200	11467400	34090300	33589200	26523000	18041700
P68104	>P68104|EF1A1_HUMAN Elongation factor 1-alpha 1 |Homo sapiens	1	1	1	1	1	1	1	1	1	1	1	1	1	1	0	0	7939400	7877000	2842500	1464500	4756400	5980300	3649300	2660700	3805900	10213000	5010600	1876200	5212500	6603000	0	0
Q9UIV1	>Q9UIV1|CNOT7_HUMAN CCR4-NOT transcription complex subunit 7 |Homo sapiens	2	1	3	4	2	3	2	4	1	2	3	4	0	0	3	3	1635220	421900	6411290	13308500	454713	8355500	9444600	11120600	749350	2814110	5664730	20629200	0	0	31093100	13957820
Q9H4A3	>Q9H4A3|WNK1_HUMAN Serine/threonine-protein kinase WNK1 |Homo sapiens	0	0	0	0	0	1	0	0	0	0	0	0	0	0	0	0	0	0	0	0	0	2062100	0	0	0	0	0	0	0	0	0	0
Q7Z417	>Q7Z417|NUFP2_HUMAN Nuclear fragile X mental retardation-interacting protein 2 |Homo sapiens	0	0	0	0	0	0	0	0	1	0	0	0	1	0	0	0	0	0	0	0	0	0	0	0	1102000	0	0	0	454060	0	0	0
Q9Y366	>Q9Y366|IFT52_HUMAN Intraflagellar transport protein 52 homolog |Homo sapiens	2	1	2	1	1	1	0	0	0	0	2	2	1	0	1	0	1513990	376620	3766400	754000	300050	1196400	0	0	0	0	4839200	1409350	761970	0	753570	0
Q9NYF0	>Q9NYF0|DACT1_HUMAN Dapper homolog 1 |Homo sapiens	1	1	1	1	2	2	2	2	2	2	1	1	1	1	1	2	5437600	3255600	1957600	1526500	13097600	13832790	6823700	3929400	5067760	7267300	2059400	921680	4092000	2794500	2057600	6908100
P26641	>P26641|EF1G_HUMAN Elongation factor 1-gamma |Homo sapiens	40	43	34	39	43	45	41	39	43	42	35	41	43	42	44	41	663734730	1918520890	264167060	478621220	1204270220	851194000	1027983950	669380630	1219276090	1937879840	379894900	618419950	1032403540	1362647871	1440501700	456432190
CON__P02533;P02533;CON__P08779;P08779;CON__Q04695;Q04695;CON__A2A4G1;CON__P19012;P19012;CON__Q6IFX2;CON__Q9QWL7;CON__P19001;CON__P08727;P08727	>P02533 SWISS-PROT:P02533 Tax_Id=9606 Gene_Symbol=KRT14 Keratin, type I cytoskeletal 14;>P02533|K1C14_HUMAN Keratin, type I cytoskeletal 14 |Homo sapiens;>P08779 SWISS-PROT:P08779 Tax_Id=9606 Gene_Symbol=KRT16 Keratin, type I cytoskeletal 16;>P08779|K1C16_	0	0	0	1	0	0	0	1	0	0	0	0	0	0	0	1	0	0	0	1334600	0	0	0	1030100	0	0	0	0	0	0	0	4830000
Q15437;Q15436	>Q15437|SC23B_HUMAN Protein transport protein Sec23B |Homo sapiens;>Q15436|SC23A_HUMAN Protein transport protein Sec23A |Homo sapiens	1	1	0	1	1	1	1	1	1	1	0	1	1	1	1	1	1948800	2402900	0	1084900	3926900	1233300	1826500	1985700	2945300	2499800	0	1262800	4436900	1912100	1870500	746900
Q9UBQ5	>Q9UBQ5|EIF3K_HUMAN Eukaryotic translation initiation factor 3 subunit K |Homo sapiens	4	15	17	17	3	14	17	17	2	13	16	14	3	15	16	17	1167690	157207210	359979370	313732660	2762920	140719000	659774800	324440280	794890	63951850	515515200	281014400	1686670	93709480	537728800	260067340
P48163	>P48163|MAOX_HUMAN NADP-dependent malic enzyme |Homo sapiens	4	3	2	1	5	2	1	0	5	4	1	2	4	3	0	0	8786100	3916210	718760	342270	8552150	1299040	595260	0	6860310	3184610	586280	625430	5650000	2873560	0	0
Q14103	>Q14103|HNRPD_HUMAN Heterogeneous nuclear ribonucleoprotein D0 |Homo sapiens	8	8	8	7	8	8	7	7	8	8	8	8	8	8	8	8	52844100	31697680	29014080	23254030	43724700	52187100	34818900	37309900	35006950	36611770	35161930	19297500	40073580	43200210	27874960	16790140
P32322	>P32322|P5CR1_HUMAN Pyrroline-5-carboxylate reductase 1, mitochondrial |Homo sapiens	18	16	13	10	18	14	13	11	16	14	14	11	18	16	11	10	212261660	89935710	26359560	13117060	257875820	147654300	44814900	32199220	132330400	125885320	39910790	18456720	237338480	160257210	45707300	18360730
P12004	>P12004|PCNA_HUMAN Proliferating cell nuclear antigen |Homo sapiens	22	23	23	20	23	22	17	18	21	21	22	20	22	23	17	12	259624400	150806640	95387690	61217690	120315940	157062290	93525660	68182460	114099950	122536230	94899200	66051660	161060740	159862850	101908210	21953860
Q8N1G0	>Q8N1G0|ZN687_HUMAN Zinc finger protein 687 |Homo sapiens	0	0	1	1	0	0	1	0	0	0	1	1	0	1	0	0	0	0	887320	836410	0	0	2644500	0	0	0	2406700	1087100	0	439830	0	0
P11142;P08107	>P11142|HSP7C_HUMAN Heat shock cognate 71 kDa protein |Homo sapiens;>P08107|HSP71_HUMAN Heat shock 70 kDa protein 1A/1B |Homo sapiens	2	2	2	2	2	2	2	2	0	2	2	2	1	1	2	2	22368890	20063300	27983370	33994920	16653740	112156900	47740000	35477290	0	13278020	21031720	26240160	14360000	330300	57948400	20939300
Q15543	>Q15543|TAF13_HUMAN Transcription initiation factor TFIID subunit 13 |Homo sapiens	0	0	2	2	0	0	2	2	0	0	2	2	0	1	2	2	0	0	4349790	4375450	0	0	4933700	3770650	0	0	5305200	3006640	0	205270	3623810	3807050
Q9ULV4	>Q9ULV4|COR1C_HUMAN Coronin-1C |Homo sapiens	8	8	8	7	7	8	5	5	7	7	6	6	8	6	5	4	26756120	16021820	7933200	7287270	14753940	14638670	8068870	7098430	13494710	9286960	5822390	4591390	17879810	8533700	10777530	3034290
Q9NU22	>Q9NU22|MDN1_HUMAN Midasin |Homo sapiens	0	10	0	7	6	1	6	8	6	11	0	7	5	7	7	6	0	19873563	0	5028291	3747109	101600	7009020	13312630	3248808	20690688	0	9997890	2737549	15618870	1.42627e+07	2623520
P13693;Q56UQ5	>P13693|TCTP_HUMAN Translationally-controlled tumor protein |Homo sapiens;>Q56UQ5|TPT1L_HUMAN TPT1-like protein |Homo sapiens	2	2	2	2	2	2	2	2	1	1	2	2	2	2	2	2	3563060	1138660	2047490	1708200	2865350	7349500	2743000	1867470	1230600	1643200	985550	1570830	1925380	2703610	4507600	1639790
P50991	>P50991|TCPD_HUMAN T-complex protein 1 subunit delta |Homo sapiens	17	20	22	27	20	20	21	27	17	20	21	26	19	16	19	24	21252600	38630400	33123780	131121479	22136580	33351980	76102080	189026150	21130190	36877850	41443364	156458548	26976033	29315360	64643400	84602240
Q9Y2L1	>Q9Y2L1|RRP44_HUMAN Exosome complex exonuclease RRP44 |Homo sapiens	1	1	0	1	1	1	1	1	2	1	0	0	1	1	1	1	839830	1305600	0	550660	2114100	788890	1045700	1638500	1757600	1066000	0	0	1355000	1122500	1050400	693480
O95487	>O95487|SC24B_HUMAN Protein transport protein Sec24B |Homo sapiens	1	1	0	1	1	0	1	1	1	1	0	0	1	1	1	1	281620	313850	0	242330	714190	0	689300	449510	507190	282080	0	0	637840	263310	462030	375340
Q86V81	>Q86V81|THOC4_HUMAN THO complex subunit 4 |Homo sapiens	2	1	2	0	2	2	1	1	3	1	0	1	1	1	1	1	2506300	1220800	1871690	0	3354220	4670190	3452500	1786100	1574100	1076500	0	255650	1231200	1360700	1372100	998360
P04075;P09972	>P04075|ALDOA_HUMAN Fructose-bisphosphate aldolase A |Homo sapiens;>P09972|ALDOC_HUMAN Fructose-bisphosphate aldolase C |Homo sapiens	8	7	7	5	9	7	6	5	7	8	8	6	9	6	5	5	194032320	158862700	81906800	40880520	244107000	138902800	67111230	38633670	138127460	129806280	79085610	44629140	179588440	119450840	27884000	18153380
Q9P258	>Q9P258|RCC2_HUMAN Protein RCC2 |Homo sapiens	7	5	6	5	8	7	6	5	5	5	5	3	7	5	5	3	12847620	8743620	4683620	4280660	14563230	9070450	7011980	6965870	3388290	4501390	6038050	1621400	11161161	6183770	7167560	1766510
O75150	>O75150|BRE1B_HUMAN E3 ubiquitin-protein ligase BRE1B |Homo sapiens	3	3	3	2	3	3	0	2	3	3	2	2	3	3	1	0	6942300	3322420	2681460	1374880	4146440	5190190	0	2368520	3065610	3754580	1731560	1117210	6799760	3584920	1122200	0
Q9Y608	>Q9Y608|LRRF2_HUMAN Leucine-rich repeat flightless-interacting protein 2 |Homo sapiens	4	5	4	3	3	4	2	1	3	3	4	2	3	4	1	3	5870180	13007370	2725710	3922740	3583300	4615150	2073710	420780	1986160	2006190	1862310	868310	2798180	2638540	11099000	6330500
Q9BUI4	>Q9BUI4|RPC3_HUMAN DNA-directed RNA polymerase III subunit RPC3 |Homo sapiens	3	5	5	6	3	3	5	5	4	4	5	7	3	4	7	6	1941460	2456030	1361270	10258300	2528700	12167700	8900100	13767800	1598010	3051580	2875040	11251380	1724490	1809870	12595290	10209760
P63241;Q6IS14;Q9GZV4	>P63241|IF5A1_HUMAN Eukaryotic translation initiation factor 5A-1 |Homo sapiens;>Q6IS14|IF5AL_HUMAN Eukaryotic translation initiation factor 5A-1-like |Homo sapiens;>Q9GZV4|IF5A2_HUMAN Eukaryotic translation initiation factor 5A-2 |Homo sapiens	5	3	4	5	5	5	5	5	5	5	5	5	5	3	4	5	36571200	10798200	14713060	12863600	25919800	34595800	23548700	34076200	13942900	12762620	11051690	7613410	23341210	6800300	13753300	12911440
CON__P02662	>P02662 SWISS-PROT:P02662 Alpha-S1-casein - Bos taurus (Bovine).	3	2	1	2	1	0	10	2	0	0	1	1	9	0	0	1	4599150	1376070	411880	922190	498520	0	529638500	2711300	0	0	243510	258650	104345617	0	0	485000
O43143	>O43143|DHX15_HUMAN Putative pre-mRNA-splicing factor ATP-dependent RNA helicase DHX15 |Homo sapiens	13	12	9	9	15	11	12	9	15	14	11	13	14	13	13	9	36724510	33494840	3522570	8723710	63377550	16340980	24904370	19359200	42392200	30840880	9595300	14607040	46487407	28535360	25435020	11602280
Q96KP4	>Q96KP4|CNDP2_HUMAN Cytosolic non-specific dipeptidase |Homo sapiens	2	2	2	1	2	2	2	0	3	2	2	2	2	3	0	0	1613460	1058230	540820	208660	1612690	2153880	1549680	0	1420150	642050	673170	530340	1201130	1265510	0	0
Q9H3U1	>Q9H3U1|UN45A_HUMAN Protein unc-45 homolog A |Homo sapiens	0	1	0	0	1	0	0	1	0	0	0	0	1	0	0	0	0	402650	0	0	528700	0	0	512890	0	0	0	0	255740	0	0	0
Q8IWC1	>Q8IWC1|MA7D3_HUMAN MAP7 domain-containing protein 3 |Homo sapiens	3	2	5	2	2	2	2	3	3	2	4	3	2	1	1	1	5146410	1937130	6596470	2736100	4721490	12933180	2583800	4552400	1620570	1740500	4364060	3145910	2236580	869470	907620	689340
CON__P13645;P13645;CON__P02535-1	>P13645 SWISS-PROT:P13645 Tax_Id=9606 Gene_Symbol=KRT10 Keratin, type I cytoskeletal 10;>P13645|K1C10_HUMAN Keratin, type I cytoskeletal 10 |Homo sapiens;>P02535-1 SWISS-PROT:P02535-1 Tax_Id=10090 Gene_Symbol=Krt10 Isoform 1 of Keratin, type I cytoskeletal	2	3	3	3	1	2	5	4	2	3	4	3	0	0	3	1	3392160	7214800	8579700	8019100	1213100	8719800	51987700	23373400	3454500	6285600	15134870	5130000	0	0	13581600	2297300
P58876;P62807;Q5QNW6;Q93079;Q99877;Q99879;Q99880;Q8N257;P23527;P33778;Q16778;Q6DN03;Q6DRA6;O60814	>P58876|H2B1D_HUMAN Histone H2B type 1-D |Homo sapiens;>P62807|H2B1C_HUMAN Histone H2B type 1-C/E/F/G/I |Homo sapiens;>Q5QNW6|H2B2F_HUMAN Histone H2B type 2-F |Homo sapiens;>Q93079|H2B1H_HUMAN Histone H2B type 1-H |Homo sapiens;>Q99877|H2B1N_HUMAN Histone	1	1	1	1	1	1	1	1	1	1	1	1	1	0	1	1	6896800	4973200	2498300	1352700	1551600	6021200	3654800	4710300	1179100	5401800	7860900	4497500	915180	0	179180	2840500
P52294	>P52294|IMA1_HUMAN Importin subunit alpha-1 |Homo sapiens	4	4	4	4	4	4	4	4	4	4	4	4	4	4	3	3	8686400	15504700	3989300	5403120	8065170	11331740	13031600	10219700	12802900	19121900	8093500	6951580	14008300	17462100	26677000	8462300
P49588	>P49588|SYAC_HUMAN Alanine--tRNA ligase, cytoplasmic |Homo sapiens	20	20	19	17	18	18	15	15	22	19	14	14	18	19	14	6	53272010	40729240	16716550	14830710	39684590	24998620	26704220	25329110	39072250	25130000	11626200	13175260	48673470	34156840	23889640	4813100
P11586	>P11586|C1TC_HUMAN C-1-tetrahydrofolate synthase, cytoplasmic |Homo sapiens	69	63	58	50	64	58	59	54	68	62	55	49	67	56	50	41	904729980	484038770	154236950	116618230	706777440	407926140	268086500	196322050	669827510	385257480	156252494	104734982	772347691	408399360	196284380	72141720
P06454	>P06454|PTMA_HUMAN Prothymosin alpha |Homo sapiens	5	4	6	6	5	6	6	6	5	4	5	4	3	2	4	5	13689450	8853810	16382060	18673110	7413240	22991080	17167600	21664640	8517130	9360710	13320180	6300160	8423670	3067330	14311540	12214280
Q9NRX4	>Q9NRX4|PHP14_HUMAN 14 kDa phosphohistidine phosphatase |Homo sapiens	2	1	2	0	2	1	0	1	0	0	1	0	2	2	0	0	966220	365620	695600	0	582730	564660	0	325120	0	0	236710	0	455200	566630	0	0
P49916	>P49916|DNLI3_HUMAN DNA ligase 3 |Homo sapiens	1	0	0	0	1	1	1	0	0	0	0	0	1	1	0	0	632490	0	0	0	667480	556220	401000	0	0	0	0	0	458910	682660	0	0
P32119	>P32119|PRDX2_HUMAN Peroxiredoxin-2 |Homo sapiens	25	24	24	22	25	25	25	24	23	23	24	23	25	24	25	23	874401600	409315250	269688300	188912290	547418200	506470200	318242370	164587920	477407600	318022000	242993950	145925340	602151000	429311400	286880340	100410820
P35520	>P35520|CBS_HUMAN Cystathionine beta-synthase |Homo sapiens	23	23	18	19	23	22	20	20	23	22	19	18	23	20	18	13	243485310	172423570	40041990	41213940	181035340	93937600	65428670	62875958	186170650	116136240	49852010	36673970	195571060	133601200	68851870	48988090
Q99575	>Q99575|POP1_HUMAN Ribonucleases P/MRP protein subunit POP1 |Homo sapiens	3	9	8	23	7	1	18	24	4	13	10	25	7	6	15	21	767860	5205920	3591155	52902150	2468310	375900	46000790	126922340	13556250	19496250	8219990	76933110	14294940	4571090	35823290	56374430
P46379	>P46379|BAG6_HUMAN Large proline-rich protein BAG6 |Homo sapiens	8	12	10	11	10	8	11	10	12	12	12	12	10	11	11	11	14106930	37962300	12918240	31684810	29497090	16685300	40468470	38506500	30509430	33510090	15836600	36208100	24063090	33862480	52044000	26893760
Q8TEX9	>Q8TEX9|IPO4_HUMAN Importin-4 |Homo sapiens	5	5	1	4	5	1	3	4	4	5	0	4	4	4	3	1	4407550	10161430	261160	3101350	13313980	696880	3502140	7519470	9383500	6274420	0	3831460	13053700	7282550	4610500	627970
Q4VC05	>Q4VC05|BCL7A_HUMAN B-cell CLL/lymphoma 7 protein family member A |Homo sapiens	1	1	3	3	0	0	3	2	0	1	3	3	0	1	1	2	348680	260430	4792130	3665850	0	0	3033950	3756400	0	232690	6588660	4232110	0	457060	1653000	2699100
Q14146	>Q14146|URB2_HUMAN Unhealthy ribosome biogenesis protein 2 homolog |Homo sapiens	0	1	1	1	1	0	1	0	0	1	1	1	0	1	0	0	0	979160	464370	591600	2027800	0	608480	0	0	1098100	1069300	208840	0	287340	0	0
Q9NY12	>Q9NY12|GAR1_HUMAN H/ACA ribonucleoprotein complex subunit 1 |Homo sapiens	4	3	3	1	4	4	3	2	3	4	3	1	4	3	2	1	50729300	32008290	24992410	5609800	36744700	10679190	18220610	12821890	18497710	24689660	19752980	5927800	36549860	26615990	5294700	1651500
Q01082;Q9H254;O15020	>Q01082|SPTB2_HUMAN Spectrin beta chain, brain 1 |Homo sapiens;>Q9H254|SPTN4_HUMAN Spectrin beta chain, brain 3 |Homo sapiens;>O15020|SPTN2_HUMAN Spectrin beta chain, brain 2 |Homo sapiens	4	3	3	2	5	2	1	0	2	3	2	2	3	3	2	2	8009290	13854200	1136420	505180	11415870	4081070	385520	0	9039400	9413700	1111590	1796730	9163930	7805960	5341200	488950
Q9Y4L1	>Q9Y4L1|HYOU1_HUMAN Hypoxia up-regulated protein 1 |Homo sapiens	2	1	1	0	1	1	0	1	1	2	0	0	2	1	1	0	1345750	490230	373140	0	920130	764340	0	719010	489720	788790	0	0	1937310	444130	526810	0
Q13885	>Q13885|TBB2A_HUMAN Tubulin beta-2A chain |Homo sapiens	1	2	2	2	0	2	2	2	1	1	2	2	1	1	2	2	6261600	7863440	9474040	11029250	0	14411100	10356000	10227100	4758400	9006000	15193200	9823590	4633400	7348800	5238780	9758300
O94763	>O94763|RMP_HUMAN Unconventional prefoldin RPB5 interactor 1 |Homo sapiens	6	6	4	4	3	4	4	2	4	5	5	4	5	4	2	3	10823490	6094540	3356906	2586890	3023280	9546700	4434620	1424330	5607480	8984270	4463300	1820020	7107420	6911500	3630500	3792940
Q96G25	>Q96G25|MED8_HUMAN Mediator of RNA polymerase II transcription subunit 8 |Homo sapiens	1	0	2	2	0	1	1	2	0	1	1	2	1	1	0	2	582200	0	1427700	3800500	0	673010	703160	3462200	0	600800	546650	2105440	194620	467030	0	1350010
Q7RTV0	>Q7RTV0|PHF5A_HUMAN PHD finger-like domain-containing protein 5A |Homo sapiens	13	13	13	11	12	13	11	11	12	13	12	7	9	11	7	4	93173450	66047700	36265050	13556266	35315810	56448380	23724210	10775740	36257690	61489560	27191780	3767600	25557240	39089800	10632750	1813610
P62937;Q9Y536;A2BFH1	>P62937|PPIA_HUMAN Peptidyl-prolyl cis-trans isomerase A |Homo sapiens;>Q9Y536|PAL4A_HUMAN Peptidyl-prolyl cis-trans isomerase A-like 4A/B/C |Homo sapiens;>A2BFH1|PAL4G_HUMAN Peptidyl-prolyl cis-trans isomerase A-like 4G |Homo sapiens	0	0	0	0	0	1	1	1	0	0	0	0	0	0	0	0	0	0	0	0	0	22329	2869900	132050	0	0	0	0	0	0	0	0
Q9H7Z7	>Q9H7Z7|PGES2_HUMAN Prostaglandin E synthase 2 |Homo sapiens	2	2	0	0	2	2	1	0	2	2	1	1	2	2	2	1	3848500	2976800	0	0	4499000	5134200	1334300	0	4172100	3910800	1808200	881070	4596300	5513200	3483400	1141300
Q14152	>Q14152|EIF3A_HUMAN Eukaryotic translation initiation factor 3 subunit A |Homo sapiens	29	153	172	178	36	138	184	184	34	144	175	179	37	113	180	183	33186830	1046499867	1514910790	2424467750	37071737	492464847	5951860950	3746998820	29936190	822881770	2452589610	3219616930	32845165	601736609	6592635743	2603559670
P63279	>P63279|UBC9_HUMAN SUMO-conjugating enzyme UBC9 |Homo sapiens	2	3	3	3	1	3	3	3	1	3	3	3	1	3	3	3	3195180	19301600	6212330	8550490	2000500	12165270	24135500	18291000	1515500	9745190	8850300	13277030	289660	11065700	38213200	8365000
Q8WUZ0	>Q8WUZ0|BCL7C_HUMAN B-cell CLL/lymphoma 7 protein family member C |Homo sapiens	1	2	2	2	1	1	1	2	0	2	2	2	1	0	2	2	352990	1208140	3947200	4790400	1005700	441070	3133400	5795500	0	1931890	3789600	2831800	527670	0	2756400	2562000
O95456	>O95456|PSMG1_HUMAN Proteasome assembly chaperone 1 |Homo sapiens	2	3	1	2	2	1	1	2	3	2	2	2	2	2	1	2	2794900	9142600	759660	7507800	38722200	3816000	2356500	13022200	7910600	8949200	10543700	5986850	3252700	3960400	1936500	7456100
P04040	>P04040|CATA_HUMAN Catalase |Homo sapiens	12	14	14	8	15	14	11	9	12	13	12	9	14	14	9	6	80024630	52995420	23580650	8344200	77198270	89058330	32623140	12623210	41959800	55663980	27281450	8032430	60181420	75622060	18111660	7042600
Q16555;Q14195	>Q16555|DPYL2_HUMAN Dihydropyrimidinase-related protein 2 |Homo sapiens;>Q14195|DPYL3_HUMAN Dihydropyrimidinase-related protein 3 |Homo sapiens	1	1	1	1	1	1	1	1	1	1	1	1	1	1	1	1	4567100	1546300	1051900	609050	1578900	1964500	746380	401240	2227700	1417000	987170	551640	2304500	1474200	798000	394710
P04406;O60733	>P04406|G3P_HUMAN Glyceraldehyde-3-phosphate dehydrogenase |Homo sapiens;>O60733|PA2G6_HUMAN 85 kDa calcium-independent phospholipase A2 |Homo sapiens	1	1	1	0	1	1	1	1	1	1	1	1	1	1	1	1	7952000	4735400	1422000	0	1224500	18047000	3411700	3083400	5500000	3245800	4623600	2248900	4837000	4769200	4780700	3862500
Q15020	>Q15020|SART3_HUMAN Squamous cell carcinoma antigen recognized by T-cells 3 |Homo sapiens	37	42	36	38	40	39	37	35	40	42	35	34	37	42	39	24	81311830	257187220	58299010	54183890	121820350	143105340	160663680	87006490	133020370	240976360	84937850	64472010	119396426	193977850	165923440	35587460
Q5VZL5;Q14202	>Q5VZL5|ZMYM4_HUMAN Zinc finger MYM-type protein 4 |Homo sapiens;>Q14202|ZMYM3_HUMAN Zinc finger MYM-type protein 3 |Homo sapiens	0	0	0	0	0	0	0	0	1	0	0	0	0	0	0	0	0	0	0	0	0	0	0	0	1765100	0	0	0	0	0	0	0
P35249	>P35249|RFC4_HUMAN Replication factor C subunit 4 |Homo sapiens	10	9	8	8	12	11	9	9	10	8	6	6	9	7	6	5	43783230	27632120	9140470	12376250	47930440	41216020	23205710	24653940	29674920	16084540	10031130	7287430	37121840	21382870	11832800	7736910
Q15269	>Q15269|PWP2_HUMAN Periodic tryptophan protein 2 homolog |Homo sapiens	4	6	0	2	5	2	5	6	6	6	1	4	6	5	4	2	3848980	20540400	0	1395640	19692400	2566270	6463610	9520930	13098800	21251670	244280	2682440	13880320	15643730	7577770	1439100
P22102	>P22102|PUR2_HUMAN Trifunctional purine biosynthetic protein adenosine-3 |Homo sapiens	54	53	44	40	53	48	40	43	50	51	40	35	51	44	37	29	414701110	301161370	85623750	78362074	370771890	201463700	129558690	121529480	375236520	241799910	83181220	72827340	393092870	241311810	113586500	39040760
P07900;Q14568;Q58FG1;P08238;Q58FF7	>P07900|HS90A_HUMAN Heat shock protein HSP 90-alpha |Homo sapiens;>Q14568|HS902_HUMAN Putative heat shock protein HSP 90-alpha A2 |Homo sapiens;>Q58FG1|HS904_HUMAN Putative heat shock protein HSP 90-alpha A4 |Homo sapiens;>P08238|HS90B_HUMAN Heat shock pro	2	2	2	2	2	2	2	2	2	2	2	2	2	2	2	2	44637000	28209000	14302000	15334500	29948600	18056000	7960000	6424100	34509000	25828000	10161700	11217100	17821300	25287700	14457000	7710800
P63261	>P63261|ACTG_HUMAN Actin, cytoplasmic 2 |Homo sapiens	2	2	2	2	2	2	2	2	2	2	2	2	2	2	2	2	41010200	42783200	34675700	47905600	28493300	31768600	43559000	56132300	43570200	53970500	49839700	48452200	41253500	37957400	28806400	21294300
Q9HCC0	>Q9HCC0|MCCB_HUMAN Methylcrotonoyl-CoA carboxylase beta chain, mitochondrial |Homo sapiens	6	6	8	8	6	7	7	10	2	5	9	9	5	5	4	9	2830340	3211540	8621430	23797500	2783160	5213190	12068500	36556400	766130	2373330	13039400	19639930	2775640	3541190	4323730	15780050
CON__P60712;P60709	>P60712 SWISS-PROT:P60712 (Bos taurus) Actin, cytoplasmic 1;>P60709|ACTB_HUMAN Actin, cytoplasmic 1 |Homo sapiens	2	2	2	2	2	2	3	3	1	1	2	2	2	1	3	3	29973050	32263350	25749890	32701200	28538000	22579500	44086700	49918800	28608000	37074000	42914700	38091300	29855100	25765000	20492700	18446700
O75153	>O75153|K0664_HUMAN Protein KIAA0664 |Homo sapiens	6	6	0	3	7	0	4	5	8	5	0	4	9	4	3	3	7881540	10258130	0	5348700	15545130	0	3220020	9521970	12885650	5150280	0	2598920	16853070	4783920	2435100	6440780
CON__P60712;P60709;Q6S8J3;A5A3E0;P0CG38;Q9BYX7;P63261;P68032;P68133;P62736;P63267	>P60712 SWISS-PROT:P60712 (Bos taurus) Actin, cytoplasmic 1;>P60709|ACTB_HUMAN Actin, cytoplasmic 1 |Homo sapiens;>Q6S8J3|POTEE_HUMAN POTE ankyrin domain family member E |Homo sapiens;>A5A3E0|POTEF_HUMAN POTE ankyrin domain family member F |Homo sapiens;>P	2	2	2	2	2	2	2	2	2	2	2	2	2	2	2	2	131730000	118050000	108933000	220892000	156323000	301050000	328670000	263500000	78556000	171876000	181005000	221148000	119729000	151409000	208933000	255200000
O60271	>O60271|JIP4_HUMAN C-Jun-amino-terminal kinase-interacting protein 4 |Homo sapiens	4	2	3	1	4	4	3	4	4	4	1	1	3	2	2	4	11071400	5540100	1333320	1281700	6233960	2617560	3956130	2321490	10198180	10638530	420140	1304000	11143900	10772900	6582100	876882
O00471	>O00471|EXOC5_HUMAN Exocyst complex component 5 |Homo sapiens	2	4	0	2	3	2	2	4	3	4	0	1	3	3	2	3	1281510	11390930	0	1482030	5625370	1203550	1770110	3844755	8441910	11451270	0	2349100	9297120	5560990	5852690	1444630
Q9UFC0	>Q9UFC0|LRWD1_HUMAN Leucine-rich repeat and WD repeat-containing protein 1 |Homo sapiens	2	2	0	1	2	0	1	2	2	2	0	2	2	2	1	1	3384810	3945650	0	1701100	11714900	0	2101700	2627770	4085700	3766400	0	1950780	7474000	4438500	4128700	563970
Q9Y4Z0	>Q9Y4Z0|LSM4_HUMAN U6 snRNA-associated Sm-like protein LSm4 |Homo sapiens	5	4	5	3	4	5	4	3	3	4	5	3	4	4	3	2	12926100	8177270	6668890	2323040	7514600	15521710	8434700	2593540	6984100	6722530	7415330	2284960	8798340	11705100	5933800	1609560
O75400	>O75400|PR40A_HUMAN Pre-mRNA-processing factor 40 homolog A |Homo sapiens	2	2	2	2	2	3	1	1	2	2	2	2	2	2	1	0	2414800	1325270	916900	896970	2157580	6244990	1265900	567540	2245850	1356350	912330	574730	1902920	1831460	276760	0
O14530	>O14530|TXND9_HUMAN Thioredoxin domain-containing protein 9 |Homo sapiens	1	1	1	0	1	1	1	1	0	1	1	0	1	1	1	1	503670	535920	900600	0	375190	1557500	871790	617510	0	558910	1190400	0	394360	566660	478030	602070
CON__P60712;P60709;Q6S8J3;A5A3E0;P0CG38;Q9BYX7;P0CG39;P63261;P68032;P68133;P62736;P63267	>P60712 SWISS-PROT:P60712 (Bos taurus) Actin, cytoplasmic 1;>P60709|ACTB_HUMAN Actin, cytoplasmic 1 |Homo sapiens;>Q6S8J3|POTEE_HUMAN POTE ankyrin domain family member E |Homo sapiens;>A5A3E0|POTEF_HUMAN POTE ankyrin domain family member F |Homo sapiens;>P	2	2	2	2	2	1	2	1	2	2	2	1	2	2	2	2	31578200	30796900	22362200	44608200	17333700	8456400	37216700	2134700	5609220	25848700	32818000	6406300	23149600	31638600	36228200	28754000
Q96AY3	>Q96AY3|FKB10_HUMAN Peptidyl-prolyl cis-trans isomerase FKBP10 |Homo sapiens	2	2	2	2	2	0	1	2	2	2	2	1	2	2	1	1	12135500	5967480	3269460	2176760	6635440	0	2418100	3690320	9143780	6586650	3219050	3379400	17761640	8863680	3225300	347960
Q9Y2A7	>Q9Y2A7|NCKP1_HUMAN Nck-associated protein 1 |Homo sapiens	9	13	3	7	14	5	7	11	16	12	4	9	16	13	8	3	11391080	32364290	4575050	6947140	54128110	7094400	14629670	15736830	70850150	29614220	9596630	7241570	53426160	25758693	15772850	2976220
Q14566	>Q14566|MCM6_HUMAN DNA replication licensing factor MCM6 |Homo sapiens	67	69	63	55	71	72	66	56	66	68	63	54	67	67	68	58	958658220	1473224320	464374380	310973090	958781140	1058883830	791308220	418068060	985568569	1448168970	699831810	324287780	1.02525e+09	1361486250	887818098	251123890
P08621	>P08621|RU17_HUMAN U1 small nuclear ribonucleoprotein 70 kDa |Homo sapiens	38	36	36	30	38	35	32	29	33	33	34	28	36	34	27	26	586474140	269621900	178145690	88039720	354245400	474429340	147307550	65839660	246667910	155713685	128025120	62012345	291612396	198905320	138241480	52818860
Q9Y333	>Q9Y333|LSM2_HUMAN U6 snRNA-associated Sm-like protein LSm2 |Homo sapiens	4	4	4	3	4	3	4	4	4	4	4	4	3	2	2	2	9816070	9698880	9754830	3551330	13189330	24675400	17436510	9044820	5563410	6309190	7915160	3049040	4748160	4388300	4515900	3597200
P09417	>P09417|DHPR_HUMAN Dihydropteridine reductase |Homo sapiens	1	0	0	1	1	2	0	0	1	1	0	0	0	1	0	0	545020	0	0	177190	395880	1394420	0	0	173580	102710	0	0	0	128940	0	0
O15047	>O15047|SET1A_HUMAN Histone-lysine N-methyltransferase SETD1A |Homo sapiens	14	14	13	13	14	14	13	12	13	14	14	13	13	13	12	8	39791290	61337150	32578960	19112910	33317110	90409800	50344180	26897020	22945220	64504700	51632000	18504400	24045620	49206560	35388050	12198820
Q8IUR7	>Q8IUR7|ARMC8_HUMAN Armadillo repeat-containing protein 8 |Homo sapiens	0	0	0	2	0	0	0	2	0	0	0	2	0	0	0	1	0	0	0	697540	0	0	0	1654070	0	0	0	1308470	0	0	0	571990
P11142;P54652;P08107;P17066	>P11142|HSP7C_HUMAN Heat shock cognate 71 kDa protein |Homo sapiens;>P54652|HSP72_HUMAN Heat shock-related 70 kDa protein 2 |Homo sapiens;>P08107|HSP71_HUMAN Heat shock 70 kDa protein 1A/1B |Homo sapiens;>P17066|HSP76_HUMAN Heat shock 70 kDa protein 6 |Hom	2	2	2	2	2	2	2	2	2	2	2	2	2	2	2	2	74817000	61738000	90610000	127517000	55329000	317980000	13584800	7084900	42782500	61542000	55495000	116603000	47239000	103447000	237052000	93197000
Q9Y2T2	>Q9Y2T2|AP3M1_HUMAN AP-3 complex subunit mu-1 |Homo sapiens	4	4	0	1	4	2	0	3	4	3	1	1	4	3	1	0	5576800	4603000	0	244020	10640000	1600290	0	2390560	4637880	2599440	802330	298870	5617330	3314700	528920	0
Q13085	>Q13085|ACACA_HUMAN Acetyl-CoA carboxylase 1 |Homo sapiens	5	22	7	16	11	10	18	18	14	22	3	17	15	21	22	16	2377070	124786370	4603830	18902430	10241680	12848220	58551650	48730900	20573500	112541160	7278350	29222520	26573190	76679660	80614390	18864400
Q96MF7	>Q96MF7|NSE2_HUMAN E3 SUMO-protein ligase NSE2 |Homo sapiens	2	0	1	1	1	1	1	0	2	1	1	0	2	1	0	0	2591740	0	839420	203590	461650	589760	331210	0	1125480	473020	753590	0	1294541	553340	0	0
Q7L2H7	>Q7L2H7|EIF3M_HUMAN Eukaryotic translation initiation factor 3 subunit M |Homo sapiens	4	31	34	35	3	24	36	34	2	29	33	34	4	23	34	34	1043714	146711420	209199980	356363390	686039	76370440	795659870	457307350	1073210	110768670	319879460	401237830	1747880	76096890	638688679	337791520
Q99613	>Q99613|EIF3C_HUMAN Eukaryotic translation initiation factor 3 subunit C |Homo sapiens	12	83	82	100	16	56	103	97	20	79	82	100	17	59	103	99	11233391	360698655	276587480	826400900	30553864	131056600	2167467480	1284104510	16052989	278272277	383184650	1336976160	18311720	194449400	2.14794e+09	911351855
O14576	>O14576|DC1I1_HUMAN Cytoplasmic dynein 1 intermediate chain 1 |Homo sapiens	1	1	1	1	2	2	1	1	1	2	1	1	1	2	2	0	15262000	16518000	11898000	4666400	17655100	12194600	20461000	5228800	5306800	21362100	18351000	9762200	9234700	13255600	16774700	0
O15318	>O15318|RPC7_HUMAN DNA-directed RNA polymerase III subunit RPC7 |Homo sapiens	3	2	3	3	1	2	1	3	3	2	3	3	3	2	2	3	2369280	2638200	8407770	12244000	885520	3430300	4268500	16690940	1955320	2302150	19477500	12580500	1689570	2619300	6880100	8167930
Q9GZZ1	>Q9GZZ1|NAA50_HUMAN N-alpha-acetyltransferase 50 |Homo sapiens	1	1	1	2	0	1	1	2	2	1	2	1	2	0	2	2	2153700	309960	1754800	2783810	0	573150	3001800	5779100	1375600	333400	3412050	1738400	4373400	0	5238600	3828400
P35658	>P35658|NU214_HUMAN Nuclear pore complex protein Nup214 |Homo sapiens	17	15	8	8	16	13	7	5	17	13	7	6	16	16	8	4	46487120	24183510	4780420	3858690	51463200	21723250	16443990	6522670	57102020	26101180	2830080	3547720	50394820	23088260	9108343	2191400
Q8N684	>Q8N684|CPSF7_HUMAN Cleavage and polyadenylation specificity factor subunit 7 |Homo sapiens	4	4	2	2	4	3	2	2	2	3	2	2	4	4	4	2	7797700	4353220	3194000	1788930	6513880	9998600	3675190	2969780	1675470	3369840	1057440	1061480	8189800	5744500	3970920	1804790
Q8TAQ2	>Q8TAQ2|SMRC2_HUMAN SWI/SNF complex subunit SMARCC2 |Homo sapiens	7	7	15	15	8	7	14	15	4	7	16	16	4	4	15	16	3909140	5899850	49155290	62324360	4627030	7330250	75937500	84391150	1804490	3919040	64112060	56005150	1365320	2049660	45142210	46563560
P67870	>P67870|CSK2B_HUMAN Casein kinase II subunit beta |Homo sapiens	5	5	5	5	5	5	5	5	5	5	5	5	5	5	4	3	25799400	16521600	12318600	9918830	22991600	25502500	19167500	11445960	10145490	13720110	8016970	7599860	18621100	18573100	10427900	3711350
Q14444	>Q14444|CAPR1_HUMAN Caprin-1 |Homo sapiens	8	8	8	7	6	5	7	5	6	8	7	7	7	7	7	8	22757500	17022314	16535172	13401070	16930470	38432900	16897900	9830211	6935950	12373137	14268032	8911300	42725451	24891350	19015610	7476911
Q5JTN6	>Q5JTN6|WDR38_HUMAN WD repeat-containing protein 38 |Homo sapiens	0	0	1	2	1	1	0	0	0	0	0	0	0	0	0	1	0	0	2010100	3930830	2744300	821880	0	0	0	0	0	0	0	0	0	782610
P58876;P62807;Q5QNW6;Q93079;Q99877;Q99879;P23527;P33778;Q16778;Q6DN03;Q6DRA6;O60814;P57053	>P58876|H2B1D_HUMAN Histone H2B type 1-D |Homo sapiens;>P62807|H2B1C_HUMAN Histone H2B type 1-C/E/F/G/I |Homo sapiens;>Q5QNW6|H2B2F_HUMAN Histone H2B type 2-F |Homo sapiens;>Q93079|H2B1H_HUMAN Histone H2B type 1-H |Homo sapiens;>Q99877|H2B1N_HUMAN Histone	1	1	1	1	1	1	1	1	1	1	1	1	1	0	1	1	12455000	12728000	10587000	9060000	11252000	27810000	21182000	9045200	6165400	10589000	30489000	13934000	9562100	0	38931000	7032500
Q14596	>Q14596|NBR1_HUMAN Next to BRCA1 gene 1 protein |Homo sapiens	1	1	1	1	1	0	1	1	1	1	1	1	1	0	1	1	1460300	2641200	1039600	2876800	4872200	0	6937300	4725500	2068300	2738400	700500	3635400	1978000	0	4440600	4494400
Q5BKZ1	>Q5BKZ1|ZN326_HUMAN Zinc finger protein 326 |Homo sapiens	4	4	4	3	1	2	3	1	4	4	4	3	4	4	3	1	4413750	4392770	11012800	8830800	651670	2329450	4806150	6816900	3008370	12496400	16297000	6730700	4688460	9188570	3380760	721020
Q04726;Q04727;Q04724;Q04725	>Q04726|TLE3_HUMAN Transducin-like enhancer protein 3 |Homo sapiens;>Q04727|TLE4_HUMAN Transducin-like enhancer protein 4 |Homo sapiens;>Q04724|TLE1_HUMAN Transducin-like enhancer protein 1 |Homo sapiens;>Q04725|TLE2_HUMAN Transducin-like enhancer protein	2	2	2	1	2	2	2	2	2	2	1	1	2	3	2	1	8398200	4117900	3677100	2034300	5853000	6981800	6433300	4489300	3554200	3087700	1323600	1098300	4021700	5228000	3186300	1370900
Q08945	>Q08945|SSRP1_HUMAN FACT complex subunit SSRP1 |Homo sapiens	8	15	16	14	11	15	15	15	8	16	17	16	10	16	15	9	9964550	93012930	67016410	37470470	17870360	57533400	122407000	57720100	10140290	61389980	127447600	43449340	19060710	74914730	95856740	28512050
O95785	>O95785|WIZ_HUMAN Protein Wiz |Homo sapiens	4	3	4	4	3	3	4	3	4	3	4	3	3	2	2	0	4315910	2194880	2966910	3419290	1355020	2387890	3602970	2659440	1885440	1722310	3816450	1959770	1373630	756280	1362110	0
P00558	>P00558|PGK1_HUMAN Phosphoglycerate kinase 1 |Homo sapiens	26	24	25	24	23	23	21	25	24	23	22	24	23	20	25	19	207328130	120084040	97411770	72945710	168720360	156539780	128356540	179197380	107941490	118158210	106250250	74533030	279441100	105182690	94346050	33952690
Q00610;P53675	>Q00610|CLH1_HUMAN Clathrin heavy chain 1 |Homo sapiens;>P53675|CLH2_HUMAN Clathrin heavy chain 2 |Homo sapiens	29	29	13	25	32	20	24	26	32	28	3	26	31	27	26	23	219328810	372807120	9726840	65242790	685940500	52194330	97855410	149037330	660477610	281517490	1460690	87814700	621130040	264847310	146171920	49091990
Q13347	>Q13347|EIF3I_HUMAN Eukaryotic translation initiation factor 3 subunit I |Homo sapiens	28	42	54	47	19	42	52	45	21	43	55	44	23	37	49	49	46134780	846111500	2444503000	1156074540	24312120	752630040	2504470870	1090408290	24228050	575341170	3728485710	1118975130	48034502	614240540	1818723100	809330180
Q9NPE3	>Q9NPE3|NOP10_HUMAN H/ACA ribonucleoprotein complex subunit 3 |Homo sapiens	7	6	5	5	7	5	5	5	7	5	6	5	7	6	4	3	52613700	22053800	13419950	8479860	40289350	18412200	7712950	5994900	19401790	15075710	15995870	5999420	36900616	22368930	9262460	1817540
P58876;P62807;Q5QNW6;Q93079;Q99877;Q99879;Q99880;Q96A08;P23527;P33778;Q16778;O60814;P57053	>P58876|H2B1D_HUMAN Histone H2B type 1-D |Homo sapiens;>P62807|H2B1C_HUMAN Histone H2B type 1-C/E/F/G/I |Homo sapiens;>Q5QNW6|H2B2F_HUMAN Histone H2B type 2-F |Homo sapiens;>Q93079|H2B1H_HUMAN Histone H2B type 1-H |Homo sapiens;>Q99877|H2B1N_HUMAN Histone	1	1	0	0	0	1	0	1	1	1	1	1	1	1	1	1	13438000	6564800	0	0	0	34914000	0	1854100	498520	5453900	3891700	1835400	13177000	20476000	33297000	7198200
REV__Q8WZ42	>Q8WZ42|TITIN_HUMAN Titin |Homo sapiens	2	2	2	2	0	1	0	3	1	1	0	1	1	1	1	1	9078720	8132567	6786350	5231650	0	7377300	0	9029010	100850	345670	0	180000	7770400	8585500	6576400	1145400
Q99536	>Q99536|VAT1_HUMAN Synaptic vesicle membrane protein VAT-1 homolog |Homo sapiens	1	1	1	1	2	1	1	1	2	1	1	1	1	1	1	1	3379100	2464800	407190	1187900	8990900	597370	1825800	3264000	6855000	2367300	826960	1429500	4010200	2721500	2515200	554330
Q5VU43	>Q5VU43|MYOME_HUMAN Myomegalin |Homo sapiens	2	2	6	9	3	1	6	8	4	2	9	8	2	2	6	9	1631730	1531590	7116980	20226490	3613780	620540	14477239	22024530	3474210	1639200	15688600	21003610	1934570	1681190	13014750	16425270
Q12788	>Q12788|TBL3_HUMAN Transducin beta-like protein 3 |Homo sapiens	15	23	5	12	23	11	15	20	21	21	5	12	23	21	18	9	16415950	89214920	1349040	7263720	84811860	14517680	22339410	28598620	76912630	76979130	1794190	12260250	68044160	64078020	36073870	8878380
O00743	>O00743|PPP6_HUMAN Serine/threonine-protein phosphatase 6 catalytic subunit |Homo sapiens	6	5	5	5	4	5	5	6	5	6	6	5	5	5	5	4	21919700	28907300	10371590	12536600	16505690	28726600	20850200	15419840	17407830	29763700	15158440	8481870	21880170	27510000	24548200	8667940
O00268	>O00268|TAF4_HUMAN Transcription initiation factor TFIID subunit 4 |Homo sapiens	3	5	12	11	1	2	13	12	2	3	14	11	3	3	11	12	1286400	2881770	45585760	41441130	756100	1488970	70437470	58214930	788480	1912380	67636370	37620040	1260230	1959600	33863070	38805400
P34896	>P34896|GLYC_HUMAN Serine hydroxymethyltransferase, cytosolic |Homo sapiens	22	18	17	13	21	19	15	12	17	14	16	12	18	16	12	7	201570720	79207640	33679550	23788090	123916860	59382510	36914790	35691870	104063500	65828330	31574310	18669890	122536885	80461410	29815650	7904630
Q96J01	>Q96J01|THOC3_HUMAN THO complex subunit 3 |Homo sapiens	15	13	16	15	13	17	15	14	12	14	16	13	12	13	12	13	82688230	98637450	102044440	63682500	40055700	156652800	128964700	67092330	41119320	112829120	170655190	54137960	47352797	75097600	72206950	45330560
Q02790	>Q02790|FKBP4_HUMAN Peptidyl-prolyl cis-trans isomerase FKBP4 |Homo sapiens	9	7	10	9	10	8	10	9	6	7	9	8	7	7	8	5	45444100	22603870	22524730	20984970	29256880	36374600	23903910	19282650	11978870	24169340	27645510	15894800	25589790	25652810	19511988	7858630
Q96S55	>Q96S55|WRIP1_HUMAN ATPase WRNIP1 |Homo sapiens	8	7	8	5	7	6	5	7	8	6	6	6	7	8	5	3	19072750	14752070	7927240	6094720	11825310	17006650	13013600	10587100	21054100	11874620	10563250	8776530	23270390	22677240	20487050	21167920
Q13428	>Q13428|TCOF_HUMAN Treacle protein |Homo sapiens	19	17	16	10	18	16	16	14	17	14	13	12	17	10	10	8	60751620	31052620	25576530	15113000	31400220	41970070	31035300	21312670	34863620	24892820	20813720	14768440	33695661	18680530	14769060	7065237
Q69YN4	>Q69YN4|VIR_HUMAN Protein virilizer homolog |Homo sapiens	4	4	0	0	5	0	0	1	6	4	0	1	6	3	1	0	2563060	4101700	0	0	10100420	0	0	352980	8378450	4507880	0	388350	7675900	2449590	1530600	0
P17480	>P17480|UBF1_HUMAN Nucleolar transcription factor 1 |Homo sapiens	6	6	7	3	6	6	5	3	6	6	6	3	5	5	2	2	16733760	11426660	10405690	5071900	23130500	20093720	15164750	5109750	9278080	10316170	9630670	2521420	10869250	7623060	4281200	3670200
P13798	>P13798|ACPH_HUMAN Acylamino-acid-releasing enzyme |Homo sapiens	36	43	39	37	37	42	41	34	37	43	41	36	36	39	38	30	202407810	836196658	192558260	125577260	223060700	570874900	351751340	154748050	242286478	793102515	342176350	140830410	224376700	613015060	334330130	69712370
Q8WYQ5	>Q8WYQ5|DGCR8_HUMAN Microprocessor complex subunit DGCR8 |Homo sapiens	1	0	1	0	1	1	0	0	1	0	1	0	1	1	0	0	1414900	0	204590	0	790410	542490	0	0	789550	0	311160	0	1065800	489490	0	0
Q6VN20	>Q6VN20|RBP10_HUMAN Ran-binding protein 10 |Homo sapiens	1	0	2	3	0	1	1	3	0	0	2	3	0	0	1	3	787860	0	646000	5972990	0	1022500	604760	8364000	0	0	911150	5675050	0	0	617370	3568600
Q96N67;Q8NF50	>Q96N67|DOCK7_HUMAN Dedicator of cytokinesis protein 7 |Homo sapiens;>Q8NF50|DOCK8_HUMAN Dedicator of cytokinesis protein 8 |Homo sapiens	0	1	0	0	1	0	1	0	1	1	0	0	0	1	1	0	0	8767500	0	0	561590	0	1149900	0	317910	3270700	0	0	0	4617100	3018100	0
P61026	>P61026|RAB10_HUMAN Ras-related protein Rab-10 |Homo sapiens	0	0	0	0	1	0	0	1	0	0	0	0	0	0	0	0	0	0	0	0	229190	0	0	657680	0	0	0	0	0	0	0	0
O00299	>O00299|CLIC1_HUMAN Chloride intracellular channel protein 1 |Homo sapiens	3	3	1	3	3	3	1	1	3	3	1	3	3	3	3	2	3434690	2940420	744220	1809230	4638920	6176900	3171500	2407200	2705650	2706660	1270100	1943360	3342310	3321660	3240070	1617450
P36776	>P36776|LONM_HUMAN Lon protease homolog, mitochondrial |Homo sapiens	4	4	3	3	4	3	4	4	4	4	4	3	4	4	3	0	14875900	7315090	1684170	2579990	22533900	9378000	5074480	11877630	10812800	22901600	4058710	1434180	11152000	16794400	3614600	0
Q16555	>Q16555|DPYL2_HUMAN Dihydropyrimidinase-related protein 2 |Homo sapiens	19	17	17	14	18	15	14	13	16	16	16	14	16	14	12	8	189700790	67007920	41230970	21920630	105849180	77268700	44975280	30315020	87747260	56894710	38826060	19801770	110837150	65943420	25298510	9966190
Q12874	>Q12874|SF3A3_HUMAN Splicing factor 3A subunit 3 |Homo sapiens	10	11	11	10	6	9	10	8	6	7	10	9	9	6	4	6	32287236	21471030	29553731	24752490	17234700	39858370	46686900	22973480	12716320	8968758	30565570	17286260	18155530	12052670	1.4607e+07	19483530
O60502	>O60502|NCOAT_HUMAN Bifunctional protein NCOAT |Homo sapiens	4	4	4	2	3	3	2	2	5	5	2	3	4	4	2	0	9746500	7621800	1797920	1540880	8342400	4559910	2076200	2176390	11705600	9453000	2048640	1832380	12291600	6606700	1793410	0
O60271;Q9UPT6	>O60271|JIP4_HUMAN C-Jun-amino-terminal kinase-interacting protein 4 |Homo sapiens;>Q9UPT6|JIP3_HUMAN C-Jun-amino-terminal kinase-interacting protein 3 |Homo sapiens	0	0	0	0	1	1	1	1	0	0	1	1	0	0	1	1	0	0	0	0	2813100	871640	1057800	1063300	0	0	752370	673090	0	0	2851600	896500
O75937	>O75937|DNJC8_HUMAN DnaJ homolog subfamily C member 8 |Homo sapiens	1	1	2	2	2	2	2	2	1	2	2	1	1	2	2	1	2132700	310110	2159200	1721900	1397340	3441500	1890940	1085450	735080	2491850	2179630	1312800	1663800	1837230	3190030	1234600
Q96IJ6	>Q96IJ6|GMPPA_HUMAN Mannose-1-phosphate guanyltransferase alpha |Homo sapiens	2	5	6	5	3	5	7	6	2	6	6	4	4	5	5	4	1146350	4515450	5402450	3070980	1227520	6302770	17234300	5904380	1072100	3446240	6121610	1574730	1613530	3806110	7011750	2545330
Q8IY31	>Q8IY31|IFT20_HUMAN Intraflagellar transport protein 20 homolog |Homo sapiens	1	1	1	1	1	1	1	1	1	1	1	1	1	1	1	1	742700	943710	2301900	1997400	670560	1662200	3248800	1009700	472160	1214400	3441000	1426600	1124900	1717600	4910200	2573500
Q9Y6I3	>Q9Y6I3|EPN1_HUMAN Epsin-1 |Homo sapiens	3	3	0	1	2	3	1	2	3	2	2	2	2	3	2	1	10461200	7536700	0	1126100	5815100	10496100	2472800	2720400	6807320	3200400	2822100	1669540	5288400	7723500	4047400	1087700
P46736	>P46736|BRCC3_HUMAN Lys-63-specific deubiquitinase BRCC36 |Homo sapiens	4	4	3	3	5	5	4	3	3	6	4	3	3	3	2	2	12300250	6793230	1956970	1758610	11498600	9678200	4471990	2623450	6913800	8798090	2462730	1541770	11122660	6130800	1844420	719360
P11441	>P11441|UBL4A_HUMAN Ubiquitin-like protein 4A |Homo sapiens	10	9	10	9	7	7	7	7	7	9	10	9	9	8	8	8	41051030	38391570	57541430	36289430	13100020	55425300	57695200	23981070	15028190	33708550	68013500	36384710	24499060	32596760	36017510	27094400
Q8NFJ9	>Q8NFJ9|BBS1_HUMAN Bardet-Biedl syndrome 1 protein |Homo sapiens	1	2	1	1	1	1	1	1	0	1	1	1	1	0	1	1	3217300	2455580	2438100	4866000	11311000	33862000	8515800	2453700	0	478030	573640	2427300	1143700	0	22778000	6164500
Q9Y4E1;Q5SRD0;Q641Q2;Q5SNT6	>Q9Y4E1|FA21C_HUMAN WASH complex subunit FAM21C |Homo sapiens;>Q5SRD0|FA21D_HUMAN Putative WASH complex subunit FAM21 |Homo sapiens;>Q641Q2|FA21A_HUMAN WASH complex subunit FAM21A |Homo sapiens;>Q5SNT6|FA21B_HUMAN WASH complex subunit FAM21B |Homo sapiens	5	5	4	4	4	5	1	4	5	5	5	4	5	4	3	2	18088600	12667200	5816300	3915000	11432300	15277500	793700	2671960	18096600	16480500	8005680	2950470	15914100	13497100	4716700	782090
Q9H7D7	>Q9H7D7|WDR26_HUMAN WD repeat-containing protein 26 |Homo sapiens	3	3	6	12	4	2	5	12	3	2	7	12	2	3	2	12	3980580	4175700	7720810	57656800	2836710	4201910	10413490	79605600	1488380	3252850	12974640	56676860	2120920	2679050	6140300	33482750
P46777	>P46777|RL5_HUMAN 60S ribosomal protein L5 |Homo sapiens	3	1	0	0	3	0	0	1	1	1	0	0	3	1	1	0	2241880	982660	0	0	3476320	0	0	401490	784400	432800	0	0	2795000	788820	525670	0
Q13123	>Q13123|RED_HUMAN Protein Red |Homo sapiens	4	4	4	2	4	4	3	1	3	3	3	3	3	4	2	1	4915920	2715740	3114470	1346290	3665860	5886410	4979800	805590	2585240	3029460	2008700	1125650	4837600	9963140	3595900	450740
P07737	>P07737|PROF1_HUMAN Profilin-1 |Homo sapiens	15	15	15	15	15	13	15	15	12	14	15	14	15	13	15	14	159075340	106781810	78896240	62075840	159193540	206413300	129502600	86415680	61629870	70912310	62394820	52912510	102336610	90823700	102191600	43201830
Q7Z4L5	>Q7Z4L5|TT21B_HUMAN Tetratricopeptide repeat protein 21B |Homo sapiens	0	0	0	0	0	0	0	0	0	0	0	0	0	0	1	0	0	0	0	0	0	0	0	0	0	0	0	0	0	0	545330	0
P56282	>P56282|DPOE2_HUMAN DNA polymerase epsilon subunit 2 |Homo sapiens	7	7	1	1	7	2	2	3	5	5	1	1	7	7	1	1	17035300	11389770	585490	871120	18973170	2616700	1479220	2170930	14968300	9501100	340040	1364100	17671560	11524350	436910	1453200
Q16555;Q14194	>Q16555|DPYL2_HUMAN Dihydropyrimidinase-related protein 2 |Homo sapiens;>Q14194|DPYL1_HUMAN Dihydropyrimidinase-related protein 1 |Homo sapiens	1	2	1	1	2	2	2	1	0	0	1	1	1	1	1	1	5371100	4478900	1426100	743370	7858200	6288200	2018480	609010	0	0	1048600	726370	2536400	1769400	789800	366800
P68400	>P68400|CSK21_HUMAN Casein kinase II subunit alpha |Homo sapiens	9	8	8	6	10	10	8	7	9	7	7	6	8	8	7	2	48409580	27311170	16518230	11847300	55828070	50574900	24975110	18033760	24943920	19651650	10600110	11616300	29633460	32499530	24859160	7080400
Q9NXG2	>Q9NXG2|THUM1_HUMAN THUMP domain-containing protein 1 |Homo sapiens	0	0	0	0	1	0	0	0	0	0	0	0	0	0	0	0	0	0	0	0	517290	0	0	0	0	0	0	0	0	0	0	0
O00487	>O00487|PSDE_HUMAN 26S proteasome non-ATPase regulatory subunit 14 |Homo sapiens	15	16	15	15	13	11	12	14	13	15	15	14	15	14	14	15	53900284	51840968	41953690	87821460	42367610	37683310	59951400	90721210	33935640	47463400	60649350	113399630	51648490	47912480	5.52171e+07	77457760
P08237	>P08237|K6PF_HUMAN 6-phosphofructokinase, muscle type |Homo sapiens	2	2	0	1	1	0	0	1	3	2	0	1	2	1	1	0	1513470	1671480	0	322890	2044200	0	0	845790	3891680	1636060	0	397040	1740250	1265500	395840	0
Q9NP50	>Q9NP50|FA60A_HUMAN Protein FAM60A |Homo sapiens	3	2	2	2	2	3	3	3	2	2	4	3	2	2	2	4	5217990	5421600	5677800	2521000	929490	12295900	9503400	3120970	4355870	4509200	16532600	5317220	1531774	4770200	4523500	2254580
O60506	>O60506|HNRPQ_HUMAN Heterogeneous nuclear ribonucleoprotein Q |Homo sapiens	1	0	0	0	1	1	0	0	1	0	0	0	1	1	0	0	4767800	0	0	0	5434800	9010600	0	0	2253300	0	0	0	4217400	6069200	0	0
Q99614	>Q99614|TTC1_HUMAN Tetratricopeptide repeat protein 1 |Homo sapiens	5	5	5	5	5	5	4	5	4	4	5	4	5	5	4	3	22072600	17893000	14253200	9631060	10299310	20815500	11529200	10050980	7910900	11162400	16728200	6752500	9910640	14157430	8438290	3580500
Q92945	>Q92945|FUBP2_HUMAN Far upstream element-binding protein 2 |Homo sapiens	24	22	23	18	25	22	21	22	23	22	24	18	24	18	17	15	131080610	69531090	48896024	33522320	83425870	99066430	65110870	52394020	64989725	61631830	64214940	29837740	106318880	81237600	52984340	22666450
Q8NB46	>Q8NB46|ANR52_HUMAN Serine/threonine-protein phosphatase 6 regulatory ankyrin repeat subunit C |Homo sapiens	1	2	0	0	2	0	0	0	2	2	1	0	3	3	1	0	1609900	4538340	0	0	3948020	0	0	0	3452740	6013590	189790	0	3700843	4281340	1671200	0
Q9NZ32	>Q9NZ32|ARP10_HUMAN Actin-related protein 10 |Homo sapiens	0	2	4	8	0	1	8	8	3	2	3	9	1	1	6	6	0	821530	3037320	22393500	0	887100	28137080	39212230	984870	848810	3626180	41815200	281870	422220	15295210	18903270
Q13363	>Q13363|CTBP1_HUMAN C-terminal-binding protein 1 |Homo sapiens	3	1	0	1	1	1	0	1	1	1	1	1	1	1	1	0	2027510	3634400	0	964750	866530	3552100	0	1240500	4803200	2719200	1842100	1350200	3979500	3844800	2461500	0
P07910	>P07910|HNRPC_HUMAN Heterogeneous nuclear ribonucleoproteins C1/C2 |Homo sapiens	2	2	2	2	1	2	1	1	2	2	2	2	2	2	2	2	3728100	4031300	3515400	2567800	1335800	6065300	328670	473260	2417440	4396400	4746100	3167100	3020900	3690000	4218700	1917960
Q15369	>Q15369|ELOC_HUMAN Transcription elongation factor B polypeptide 1 |Homo sapiens	8	8	8	6	8	7	6	5	7	8	6	5	8	8	3	4	34082200	17028350	11623130	6388540	16849630	25607400	19652300	7446490	13762120	16586320	9109260	4010860	22594470	22522130	7413800	4811350
O75131	>O75131|CPNE3_HUMAN Copine-3 |Homo sapiens	1	1	0	1	1	0	1	1	1	1	1	1	1	1	0	0	1226700	774310	0	407890	1458300	0	481660	933230	870840	1081500	276430	460120	1502600	994140	0	0
Q13838;O00148	>Q13838|DX39B_HUMAN Spliceosome RNA helicase DDX39B |Homo sapiens;>O00148|DX39A_HUMAN ATP-dependent RNA helicase DDX39A |Homo sapiens	4	4	2	3	5	4	5	5	4	5	3	4	5	5	2	4	10810180	8684000	3761600	7392820	19660000	8028510	16918500	23191200	8601450	8073380	5398470	7096390	14942830	9957300	5088300	3249430
P07900;P08238;Q58FF8	>P07900|HS90A_HUMAN Heat shock protein HSP 90-alpha |Homo sapiens;>P08238|HS90B_HUMAN Heat shock protein HSP 90-beta |Homo sapiens;>Q58FF8|H90B2_HUMAN Putative heat shock protein HSP 90-beta 2 |Homo sapiens	1	1	1	1	1	1	1	1	1	1	1	1	1	1	1	1	1770700	991110	1390600	1418200	1694000	3329700	2187000	1560900	2205900	2123000	1382900	1549100	3306600	3079400	4177500	1540100
P17858	>P17858|K6PL_HUMAN 6-phosphofructokinase, liver type |Homo sapiens	1	1	0	1	2	0	0	2	2	2	0	1	1	1	1	1	3250000	1283900	0	436990	2473800	0	0	6817200	3311050	2302950	0	660540	2891200	1040200	1350700	687200
P05114	>P05114|HMGN1_HUMAN Non-histone chromosomal protein HMG-14 |Homo sapiens	1	0	1	1	0	1	1	1	1	0	1	0	1	0	0	0	557980	0	627390	676750	0	1762900	2410300	2202900	269090	0	501300	0	240550	0	0	0
Q13555	>Q13555|KCC2G_HUMAN Calcium/calmodulin-dependent protein kinase type II subunit gamma |Homo sapiens	0	2	4	4	0	1	4	4	1	1	4	4	0	1	3	4	0	945000	7087070	7714900	0	360460	14145200	9421250	85430	173910	13197800	9729050	0	953160	11062800	8993100
P52597	>P52597|HNRPF_HUMAN Heterogeneous nuclear ribonucleoprotein F |Homo sapiens	7	7	7	7	7	7	7	6	6	7	8	7	7	6	7	6	19527300	14068700	16779530	12415330	15115340	20908400	19795900	12524100	5889190	12387050	19776330	11291110	13023890	11158860	9495178	9332680
Q3ZCM7;P68371;P04350	>Q3ZCM7|TBB8_HUMAN Tubulin beta-8 chain |Homo sapiens;>P68371|TBB4B_HUMAN Tubulin beta-4B chain |Homo sapiens;>P04350|TBB4A_HUMAN Tubulin beta-4A chain |Homo sapiens	2	2	2	2	2	2	2	2	2	2	2	2	2	2	2	2	62276000	66670100	114920100	132436400	51831500	118085000	197903500	172052700	35831340	59888800	155045400	125986600	33702060	78991100	97155000	139821000
P19838	>P19838|NFKB1_HUMAN Nuclear factor NF-kappa-B p105 subunit |Homo sapiens	1	0	0	0	1	0	1	0	1	1	1	0	1	0	0	0	1621600	0	0	0	1317800	0	954180	0	944520	633990	685590	0	1312000	0	0	0
Q8N201	>Q8N201|INT1_HUMAN Integrator complex subunit 1 |Homo sapiens	0	1	0	1	0	0	1	1	0	1	0	2	0	0	1	0	0	895930	0	1344000	0	0	1856400	3818500	0	1105100	0	3876830	0	0	1544500	0
Q92598;O95757	>Q92598|HS105_HUMAN Heat shock protein 105 kDa |Homo sapiens;>O95757|HS74L_HUMAN Heat shock 70 kDa protein 4L |Homo sapiens	2	2	2	2	2	2	1	1	2	2	2	1	2	2	0	0	4070700	2499070	1061110	1215690	2968290	2418800	383470	331560	2633540	1903960	1482750	680890	3549400	2642200	0	0
Q92793;Q09472	>Q92793|CBP_HUMAN CREB-binding protein |Homo sapiens;>Q09472|EP300_HUMAN Histone acetyltransferase p300 |Homo sapiens	1	1	0	1	1	0	0	1	1	1	0	0	1	1	0	0	617610	707430	0	285770	977540	0	0	407950	490190	726480	0	0	997320	754610	0	0
REV__CON__P13647;REV__P13647;REV__CON__Q5XQN5;REV__CON__Q922U2	>P13647 SWISS-PROT:P13647 Tax_Id=9606 Gene_Symbol=KRT5 Keratin, type II cytoskeletal 5;>P13647|K2C5_HUMAN Keratin, type II cytoskeletal 5 |Homo sapiens;>Q5XQN5 SWISS-PROT:Q5XQN5 (Bos taurus) Keratin, type II cytoskeletal 5;>Q922U2 SWISS-PROT:Q922U2 Tax_Id=	1	1	1	1	1	1	0	0	0	1	1	1	0	1	0	1	11935000	5327700	6269300	2122000	7416600	1207100	0	0	0	9002400	13988000	5965100	0	2518500	0	9726600
P00367;P49448	>P00367|DHE3_HUMAN Glutamate dehydrogenase 1, mitochondrial |Homo sapiens;>P49448|DHE4_HUMAN Glutamate dehydrogenase 2, mitochondrial |Homo sapiens	20	25	24	19	20	24	23	21	17	23	22	18	19	21	24	18	97769440	322612920	129494870	56782050	86096330	329874200	229719970	116415710	72431360	295811970	170323830	58223220	95703061	291157430	157810232	29762650
Q16881;Q9NNW7	>Q16881|TRXR1_HUMAN Thioredoxin reductase 1, cytoplasmic |Homo sapiens;>Q9NNW7|TRXR2_HUMAN Thioredoxin reductase 2, mitochondrial |Homo sapiens	1	1	1	0	1	0	0	0	1	1	0	0	1	1	0	0	2521200	1930100	697720	0	2294700	0	0	0	1271000	1177200	0	0	1886100	2200300	0	0
Q8TC71	>Q8TC71|MIEAP_HUMAN Mitochondria-eating protein |Homo sapiens	0	0	0	0	0	0	1	0	0	0	0	0	0	0	1	0	0	0	0	0	0	0	1737600	0	0	0	0	0	0	0	1003100	0
O95248	>O95248|MTMR5_HUMAN Myotubularin-related protein 5 |Homo sapiens	0	3	0	4	1	0	3	4	0	4	1	3	0	2	3	2	0	3714020	0	2847540	268900	0	7661500	7295170	0	4514260	826290	5195500	0	2258360	12272800	2758600
P30048	>P30048|PRDX3_HUMAN Thioredoxin-dependent peroxide reductase, mitochondrial |Homo sapiens	11	9	9	10	12	11	11	11	11	10	10	6	11	10	9	8	170747400	61602680	34695700	23677010	136388600	111627800	68806600	37442400	81514600	51359430	35637080	18952460	132033150	60135280	47052990	18412890
P23921	>P23921|RIR1_HUMAN Ribonucleoside-diphosphate reductase large subunit |Homo sapiens	6	5	5	4	7	5	2	3	8	4	4	4	8	6	3	3	11448260	7183330	3037120	2189520	11624770	5602510	3054240	3285860	15037070	3983320	2920180	2970850	1.41921e+07	6179720	1540084	683330
P21333;Q14315	>P21333|FLNA_HUMAN Filamin-A |Homo sapiens;>Q14315|FLNC_HUMAN Filamin-C |Homo sapiens	1	1	1	1	1	1	1	0	1	1	1	1	1	1	0	0	6428600	4819800	730890	763550	3411800	1387200	867430	0	5305400	2252600	537180	518890	5132300	1995000	0	0
Q96AX1	>Q96AX1|VP33A_HUMAN Vacuolar protein sorting-associated protein 33A |Homo sapiens	2	3	0	0	1	1	0	1	1	2	0	1	2	3	1	1	1311790	3791120	0	0	775900	314200	0	534500	1139000	3829000	0	577770	1851700	3635320	1690800	302930
Q13557;Q13555;Q13554	>Q13557|KCC2D_HUMAN Calcium/calmodulin-dependent protein kinase type II subunit delta |Homo sapiens;>Q13555|KCC2G_HUMAN Calcium/calmodulin-dependent protein kinase type II subunit gamma |Homo sapiens;>Q13554|KCC2B_HUMAN Calcium/calmodulin-dependent protein	0	1	1	1	0	1	1	1	0	1	1	1	0	1	1	1	0	1232600	2908300	4336600	0	1431900	7564700	5912100	0	674590	8622500	3735000	0	887930	2940000	2533000
Q5SY68	>Q5SY68|S1A7B_HUMAN Protein S100-A7-like 2 |Homo sapiens	0	0	0	0	0	0	0	0	0	0	0	0	0	0	0	0	0	0	0	0	0	0	0	0	0	0	0	0	0	0	0	0
Q9Y3A3	>Q9Y3A3|PHOCN_HUMAN MOB-like protein phocein |Homo sapiens	8	11	11	9	8	11	11	10	5	10	11	8	9	10	10	7	25893300	75682500	30242770	16299800	16430050	83142630	53505840	20083160	10724000	60689590	74016950	18458510	16470363	68366600	47315160	9414680
O95218	>O95218|ZRAB2_HUMAN Zinc finger Ran-binding domain-containing protein 2 |Homo sapiens	3	2	3	3	1	3	3	1	2	3	3	1	3	1	1	1	6566540	3651100	3176110	2103740	1120400	4512800	4009990	1320200	2313730	4292160	3545600	978180	3352590	1524400	1036200	380330
O60701	>O60701|UGDH_HUMAN UDP-glucose 6-dehydrogenase |Homo sapiens	2	1	1	0	2	2	0	1	2	0	0	0	2	1	0	0	2915800	616510	293580	0	1688630	2233390	0	572620	1163640	0	0	0	2575560	717210	0	0
P31946;P27348;P63104;P61981;Q04917;P62258	>P31946|1433B_HUMAN 14-3-3 protein beta/alpha |Homo sapiens;>P27348|1433T_HUMAN 14-3-3 protein theta |Homo sapiens;>P63104|1433Z_HUMAN 14-3-3 protein zeta/delta |Homo sapiens;>P61981|1433G_HUMAN 14-3-3 protein gamma |Homo sapiens;>Q04917|1433F_HUMAN 14-3-3	2	2	2	2	2	1	2	2	2	2	2	2	2	1	2	2	33157600	17851400	16711800	17224900	25711500	48657000	28398000	11762000	3363810	16058500	13556100	17126800	18411300	23005000	34112000	15280700
Q9Y383	>Q9Y383|LC7L2_HUMAN Putative RNA-binding protein Luc7-like 2 |Homo sapiens	6	6	4	3	4	4	2	3	4	5	5	4	4	3	3	3	16628740	8694570	4284480	3371300	7237780	10886800	5046420	4955530	4103590	6704280	7502750	2454920	4708980	5012920	2579010	1449590
Q7L576;Q96F07	>Q7L576|CYFP1_HUMAN Cytoplasmic FMR1-interacting protein 1 |Homo sapiens;>Q96F07|CYFP2_HUMAN Cytoplasmic FMR1-interacting protein 2 |Homo sapiens	5	7	2	2	8	2	3	4	6	6	0	3	7	7	4	2	16239390	14610160	680850	4360770	27501580	1430190	3441290	4016570	23785800	14587690	0	2557530	29327800	13370560	13516200	1755720
Q15428	>Q15428|SF3A2_HUMAN Splicing factor 3A subunit 2 |Homo sapiens	2	2	5	2	1	3	5	3	3	2	5	2	3	2	2	2	4073900	2420100	13566400	3946300	1318700	10778300	20022290	11483800	2627610	1662230	7632200	2339800	4335800	4621900	6007400	5562800
Q6P2C8	>Q6P2C8|MED27_HUMAN Mediator of RNA polymerase II transcription subunit 27 |Homo sapiens	0	0	0	0	0	0	0	1	0	0	0	0	0	0	0	0	0	0	0	0	0	0	0	940180	0	0	0	0	0	0	0	0
P58876;P62807;Q5QNW6;Q93079;Q99877;Q99879;Q99880;O60814;P57053	>P58876|H2B1D_HUMAN Histone H2B type 1-D |Homo sapiens;>P62807|H2B1C_HUMAN Histone H2B type 1-C/E/F/G/I |Homo sapiens;>Q5QNW6|H2B2F_HUMAN Histone H2B type 2-F |Homo sapiens;>Q93079|H2B1H_HUMAN Histone H2B type 1-H |Homo sapiens;>Q99877|H2B1N_HUMAN Histone	2	2	2	2	1	2	2	1	1	1	2	2	1	2	2	2	1990850	6486000	5278300	5947820	1536900	9579000	9487900	742540	3396900	1661500	17817600	7432600	2059800	15874100	11428600	3727540
P60660	>P60660|MYL6_HUMAN Myosin light polypeptide 6 |Homo sapiens	13	11	12	13	12	12	12	13	11	11	13	12	11	11	11	12	125199220	129662420	162190950	200557700	82537670	179973200	181455340	177686030	55758440	88754410	203229770	143441570	80331040	109498120	105618300	111034460
Q9UKV3	>Q9UKV3|ACINU_HUMAN Apoptotic chromatin condensation inducer in the nucleus |Homo sapiens	0	0	1	0	1	1	0	0	0	0	0	0	0	0	0	0	0	0	140780	0	155690	429980	0	0	0	0	0	0	0	0	0	0
Q9H0E3	>Q9H0E3|SP130_HUMAN Histone deacetylase complex subunit SAP130 |Homo sapiens	3	11	11	9	4	12	12	12	3	9	11	9	4	10	9	7	3340950	23305620	22945320	10357670	6350650	30941200	39251820	16672040	1727840	13453130	37575300	8833360	1254391	20149150	19611575	9135760
Q9BV68	>Q9BV68|RN126_HUMAN RING finger protein 126 |Homo sapiens	3	4	4	4	3	4	4	3	3	4	4	4	3	4	3	3	18070900	24562630	19472600	13297460	8429900	25415600	22792350	14617700	10889700	17955690	27198300	14630390	13389800	15468730	12441060	9570530
Q9Y5K5	>Q9Y5K5|UCHL5_HUMAN Ubiquitin carboxyl-terminal hydrolase isozyme L5 |Homo sapiens	10	12	14	12	13	10	12	13	9	10	14	14	11	12	11	14	32806000	38652910	53428700	80839500	20374490	37710600	53853200	72957400	19201000	35056110	95275700	99223100	28866490	45872430	45464880	65071800
O60841	>O60841|IF2P_HUMAN Eukaryotic translation initiation factor 5B |Homo sapiens	2	2	2	1	2	2	2	2	2	2	2	2	2	2	2	2	3371800	2833700	1013820	331560	5683000	2682720	2904790	2619400	3440300	2875990	1041800	1812560	4104300	4127800	3469300	1173620
Q13619	>Q13619|CUL4A_HUMAN Cullin-4A |Homo sapiens	1	2	0	0	2	0	1	0	3	1	1	2	0	2	1	1	452890	938370	0	0	2011030	0	1354600	0	1708870	664000	1982800	1533940	0	660710	477750	863640
Q6P2Q9	>Q6P2Q9|PRP8_HUMAN Pre-mRNA-processing-splicing factor 8 |Homo sapiens	7	8	5	62	5	10	45	64	5	5	7	67	5	5	33	58	3398710	13174450	52535590	221301340	5506380	16725880	115801600	470739940	6474910	17673500	2246023	323571990	4136731	8478870	83724580	238462950
P04818	>P04818|TYSY_HUMAN Thymidylate synthase |Homo sapiens	2	2	1	1	2	1	1	1	2	2	1	1	2	1	1	1	1676370	1261470	369560	519930	1386810	1232400	950710	1110100	1512050	1188500	459900	428220	1770820	1011700	1187700	485860
Q04917	>Q04917|1433F_HUMAN 14-3-3 protein eta |Homo sapiens	3	3	3	3	3	3	3	3	2	3	3	2	2	3	3	3	12121440	10368320	9946500	9733140	17856970	35233000	14779000	11621780	7584700	9101990	7456370	7771400	13512700	16988300	23913600	12345000
CON__P13645;P13645;CON__P02535-1;CON__Q7Z3Y7;CON__Q148H6;Q7Z3Y7;CON__P08730-1;CON__Q2M2I5;Q2M2I5;CON__REFSEQ:XP_986630;CON__O76014;CON__O76013;O76013;P13646;CON__O76015;O76015;CON__Q497I4;Q92764;CON__A2AB72;O76014;CON__Q14532;Q14532;P05783;CON__Q92764;CON__P05784;CON__ENSEMBL:ENSP00000377550;CON__A2A5Y0;CON__Q15323;CON__Q9UE12;Q15323;CON__Q14525;Q14525;CON__P02533;P02533;CON__P08779;P08779;CON__Q…	>P13645 SWISS-PROT:P13645 Tax_Id=9606 Gene_Symbol=KRT10 Keratin, type I cytoskeletal 10;>P13645|K1C10_HUMAN Keratin, type I cytoskeletal 10 |Homo sapiens;>P02535-1 SWISS-PROT:P02535-1 Tax_Id=10090 Gene_Symbol=Krt10 Isoform 1 of Keratin, type I cytoskeletal	1	0	1	1	0	1	1	1	0	0	1	1	1	1	1	1	939570	0	682140	2217600	0	864240	9100500	3334000	0	0	3568000	1210700	212530	576040	2480300	9047400
P52435;Q9GZM3	>P52435|RPB11_HUMAN DNA-directed RNA polymerase II subunit RPB11-a |Homo sapiens;>Q9GZM3|RPB1B_HUMAN DNA-directed RNA polymerase II subunit RPB11-b1 |Homo sapiens	0	1	1	1	0	1	1	1	0	1	1	1	0	1	1	1	0	1604700	2064700	1030100	0	1794500	5469500	2088900	0	1420100	2458700	489050	0	875760	1450600	446150
P07900;Q58FG1	>P07900|HS90A_HUMAN Heat shock protein HSP 90-alpha |Homo sapiens;>Q58FG1|HS904_HUMAN Putative heat shock protein HSP 90-alpha A4 |Homo sapiens	1	1	0	1	1	0	0	1	1	1	1	1	1	1	1	1	15861000	6713600	0	1439100	2070000	0	0	2178000	7312100	3799000	1045100	1333700	12611000	10179000	10642000	2015700
Q14686	>Q14686|NCOA6_HUMAN Nuclear receptor coactivator 6 |Homo sapiens	1	2	2	1	0	2	1	1	1	2	2	0	1	2	1	2	761330	1098210	1527430	219630	0	3019880	1226900	611040	436720	907210	1929390	0	558190	3580720	3220700	1064850
Q9BTE1	>Q9BTE1|DCTN5_HUMAN Dynactin subunit 5 |Homo sapiens	2	3	6	5	1	4	5	6	1	3	6	5	3	2	4	7	6752600	5646220	26340970	25824590	1959500	11545770	26739600	36392100	1244300	6254890	55044920	25430070	3832830	4621780	24498040	32573410
Q8IZ83	>Q8IZ83|A16A1_HUMAN Aldehyde dehydrogenase family 16 member A1 |Homo sapiens	1	7	8	8	3	6	7	9	3	7	6	7	4	5	7	7	283460	15314440	12760940	18390830	1646060	7563070	16872600	31711600	1593850	19142680	6215740	18576900	8879880	13379000	13648440	9522780
P12277	>P12277|KCRB_HUMAN Creatine kinase B-type |Homo sapiens	41	39	39	38	44	42	40	33	39	40	38	36	41	41	41	38	2252861800	1182673390	862757960	458108370	1258210480	1464520800	827965060	567414600	827452740	742092470	756373140	485765600	1247893140	1198291010	666707070	328854140
Q9NWV8	>Q9NWV8|BABA1_HUMAN BRISC and BRCA1-A complex member 1 |Homo sapiens	4	4	3	2	4	2	2	3	3	3	3	0	4	3	1	1	10384940	5580350	3633510	1886970	4843260	7947400	2535490	2356700	4581180	4326030	2323240	0	7937210	5143490	2094300	858390
Q12996	>Q12996|CSTF3_HUMAN Cleavage stimulation factor subunit 3 |Homo sapiens	14	18	0	7	16	6	8	14	18	15	1	10	20	16	11	7	27315110	37085840	0	3256080	71066550	5620120	11534780	20840390	50472980	32881800	229500	6675550	67354800	27772480	16159690	6000500
P31946;P27348;P63104	>P31946|1433B_HUMAN 14-3-3 protein beta/alpha |Homo sapiens;>P27348|1433T_HUMAN 14-3-3 protein theta |Homo sapiens;>P63104|1433Z_HUMAN 14-3-3 protein zeta/delta |Homo sapiens	1	1	1	1	1	1	1	1	1	1	1	1	1	1	1	1	5635200	3091700	1471800	1211300	1630600	18363000	2603800	1816100	1361500	700820	3213900	713680	2373700	3763800	7277800	3050600
O75821	>O75821|EIF3G_HUMAN Eukaryotic translation initiation factor 3 subunit G |Homo sapiens	11	22	31	28	8	24	30	26	5	22	32	28	8	20	27	28	20104500	402048480	1408134770	597679060	11268480	500649230	1286660090	739602660	6322060	250659821	1639062970	524580780	13246160	259638710	907089501	631042940
Q13535	>Q13535|ATR_HUMAN Serine/threonine-protein kinase ATR |Homo sapiens	0	0	1	10	1	0	6	10	0	1	0	9	0	1	6	9	0	0	130550	10331870	160880	0	8722270	22303300	0	621710	0	13934940	0	355700	6398110	12277930
P08670	>P08670|VIME_HUMAN Vimentin |Homo sapiens	6	6	6	6	3	5	6	7	4	6	8	6	4	6	5	7	6100940	10187630	11547450	12800320	2803030	6792750	12452800	14252000	2270100	4490140	18634790	8598070	4379790	7943330	5848970	9578600
P20839	>P20839|IMDH1_HUMAN Inosine-5-monophosphate dehydrogenase 1 |Homo sapiens	1	4	4	3	0	3	4	3	2	4	5	2	0	2	1	2	906220	2790580	2712390	2085960	0	2427890	4091130	2813650	896410	3592200	5565980	1273140	0	1547360	3302900	1659220
Q14161	>Q14161|GIT2_HUMAN ARF GTPase-activating protein GIT2 |Homo sapiens	3	3	4	1	2	2	2	2	1	3	5	2	3	2	1	1	1909990	2800710	3957720	579940	719300	937180	3340400	1491160	323350	2464490	5564660	1540350	1715860	1856100	385650	775320
P24928	>P24928|RPB1_HUMAN DNA-directed RNA polymerase II subunit RPB1 |Homo sapiens	4	37	47	44	4	31	47	43	2	29	48	47	3	30	41	41	2098740	78626386	91848340	114715330	3165330	38486041	290748990	215872590	646550	45660064	177235740	159508270	1893170	59877560	212307980	99202520
Q9NVU0	>Q9NVU0|RPC5_HUMAN DNA-directed RNA polymerase III subunit RPC5 |Homo sapiens	0	4	14	18	0	2	17	18	0	4	19	19	0	3	13	14	0	3455230	24454210	79032210	0	608200	80638490	112694700	0	3228900	62685530	97399840	0	3138860	56262060	67045940
P11310	>P11310|ACADM_HUMAN Medium-chain specific acyl-CoA dehydrogenase, mitochondrial |Homo sapiens	14	13	13	7	12	13	10	10	13	12	9	4	12	11	6	7	63006320	35437560	15499300	11341000	61042400	44764300	20150400	20387680	31857590	24433770	11070900	3736840	48591122	29652360	10831200	4883190
Q13416	>Q13416|ORC2_HUMAN Origin recognition complex subunit 2 |Homo sapiens	2	2	2	2	2	1	2	2	2	2	1	2	2	1	1	1	2683740	1951440	444310	978660	4628300	412230	1895250	1978470	2622630	2036420	88356	623105	4398850	2103600	1374500	174050
Q13033	>Q13033|STRN3_HUMAN Striatin-3 |Homo sapiens	6	9	9	7	6	8	7	7	5	9	9	6	6	8	6	4	10734470	41881700	22968420	14080920	10033840	30592640	22365480	14241500	20830930	40253800	28398200	14218520	19105100	58775500	24872830	7448350
P07900;Q14568	>P07900|HS90A_HUMAN Heat shock protein HSP 90-alpha |Homo sapiens;>Q14568|HS902_HUMAN Putative heat shock protein HSP 90-alpha A2 |Homo sapiens	0	1	1	1	1	1	1	1	0	0	0	0	0	1	1	1	0	605690	257770	551060	2122600	2625400	2198000	798280	0	0	0	0	0	951430	1325500	659970
P63167;Q96FJ2	>P63167|DYL1_HUMAN Dynein light chain 1, cytoplasmic |Homo sapiens;>Q96FJ2|DYL2_HUMAN Dynein light chain 2, cytoplasmic |Homo sapiens	2	4	3	3	3	4	3	2	2	4	3	3	4	4	3	3	18537100	28971300	6547640	9131390	24221700	13312190	12686200	12522500	24038400	31372600	10678200	13437160	29166650	33593070	18396500	7683600
CON__P02533;P02533;CON__Q04695;Q04695;CON__Q6IFX2	>P02533 SWISS-PROT:P02533 Tax_Id=9606 Gene_Symbol=KRT14 Keratin, type I cytoskeletal 14;>P02533|K1C14_HUMAN Keratin, type I cytoskeletal 14 |Homo sapiens;>Q04695 SWISS-PROT:Q04695 Tax_Id=9606 Gene_Symbol=KRT17 Keratin, type I cytoskeletal 17;>Q04695|K1C17_	0	0	0	0	0	1	1	0	0	0	1	0	0	0	0	1	0	0	0	0	0	499800	381140	0	0	0	267650	0	0	0	0	836220
O43143;Q14562;O60231	>O43143|DHX15_HUMAN Putative pre-mRNA-splicing factor ATP-dependent RNA helicase DHX15 |Homo sapiens;>Q14562|DHX8_HUMAN ATP-dependent RNA helicase DHX8 |Homo sapiens;>O60231|DHX16_HUMAN Putative pre-mRNA-splicing factor ATP-dependent RNA helicase DHX16 |Ho	1	1	1	1	1	1	1	0	1	1	1	1	1	1	1	1	4106800	6220600	489920	1174400	4233300	1782800	866030	0	4178700	3365900	992580	1779500	3750700	3568500	2567800	737150
P27695	>P27695|APEX1_HUMAN DNA-(apurinic or apyrimidinic site) lyase |Homo sapiens	1	1	0	0	1	1	0	0	1	1	0	1	1	1	0	0	2308900	1065400	0	0	1787300	1042400	0	0	1652100	1132600	0	635290	1791400	1667500	0	0
Q16514	>Q16514|TAF12_HUMAN Transcription initiation factor TFIID subunit 12 |Homo sapiens	2	1	3	2	3	2	3	3	3	1	3	2	2	1	2	3	1292190	1537900	9275460	7694200	1522927	3028330	12655110	7731610	1406600	1525900	12513300	5910500	1517960	2602700	7192600	11536860
Q6P2E9	>Q6P2E9|EDC4_HUMAN Enhancer of mRNA-decapping protein 4 |Homo sapiens	13	12	5	11	14	6	10	13	14	13	6	12	14	10	9	10	32207700	46452030	2467250	15803780	80179370	12839700	19975160	36491520	68636000	58316870	4409920	24566150	56923205	32343450	20335830	11822930
P05388;Q8NHW5	>P05388|RLA0_HUMAN 60S acidic ribosomal protein P0 |Homo sapiens;>Q8NHW5|RLA0L_HUMAN 60S acidic ribosomal protein P0-like |Homo sapiens	0	0	0	0	0	0	1	1	0	0	0	0	0	0	0	0	0	0	0	0	0	0	871190	826650	0	0	0	0	0	0	0	0
P60900	>P60900|PSA6_HUMAN Proteasome subunit alpha type-6 |Homo sapiens	12	13	12	20	12	15	8	20	10	12	15	20	10	13	9	20	21308050	23517150	17337210	308259800	19482000	45296350	20398250	198853400	11496440	21887460	24152020	368960300	14343820	26947640	16199070	213957160
Q9UMX0;Q9UHD9	>Q9UMX0|UBQL1_HUMAN Ubiquilin-1 |Homo sapiens;>Q9UHD9|UBQL2_HUMAN Ubiquilin-2 |Homo sapiens	1	1	1	1	1	1	1	1	1	1	1	1	1	1	1	1	4716200	3714300	2771600	1351900	2741100	7155400	4787000	2522100	2755700	4632100	3086700	1240600	2177500	3360400	2226800	1966300
P23381	>P23381|SYWC_HUMAN Tryptophan--tRNA ligase, cytoplasmic |Homo sapiens	5	5	5	4	5	5	4	5	5	5	5	4	5	5	3	3	14337500	8675800	5185320	3284570	10645200	9046340	4761670	5608350	8872710	6018120	6527180	3050240	9738900	7128640	4254900	1411840
P14174	>P14174|MIF_HUMAN Macrophage migration inhibitory factor |Homo sapiens	6	6	6	6	5	5	6	5	5	5	6	5	5	5	4	4	192335100	133260950	104292530	81472700	145991370	200245630	159638100	95708900	64443140	71798570	96786310	73453710	62577410	102761760	104283590	58742100
Q15024	>Q15024|EXOS7_HUMAN Exosome complex component RRP42 |Homo sapiens	14	13	10	10	13	10	10	9	13	14	10	8	12	13	10	7	71461490	77096270	14976900	12386030	91298700	43001320	18791700	11703340	75798950	86481760	29343090	5923720	60545060	83732660	27373520	6641440
Q9NPI6	>Q9NPI6|DCP1A_HUMAN mRNA-decapping enzyme 1A |Homo sapiens	2	2	2	1	1	2	1	1	2	2	1	1	2	2	1	1	7371600	4662400	2800200	1342500	3445600	4215900	3961100	2071000	5026300	3504500	2003200	1388700	5198000	4369560	1326200	822420
Q5VUJ6	>Q5VUJ6|LRCH2_HUMAN Leucine-rich repeat and calponin homology domain-containing protein 2 |Homo sapiens	1	1	1	0	1	1	1	0	1	1	1	1	1	1	1	1	451270	1421500	826750	0	542370	1597900	1284500	0	578560	1303000	1107500	395860	528640	1650400	1204200	405380
CON__P60712;P60709;P63261;Q562R1	>P60712 SWISS-PROT:P60712 (Bos taurus) Actin, cytoplasmic 1;>P60709|ACTB_HUMAN Actin, cytoplasmic 1 |Homo sapiens;>P63261|ACTG_HUMAN Actin, cytoplasmic 2 |Homo sapiens;>Q562R1|ACTBL_HUMAN Beta-actin-like protein 2 |Homo sapiens	1	1	0	1	1	1	1	1	1	1	1	1	1	1	1	1	12706000	13593000	0	21277000	12755000	20949000	27769000	24034000	9971900	11145000	15366000	20538000	12521000	8843800	15679000	8845900
Q9Y6K9	>Q9Y6K9|NEMO_HUMAN NF-kappa-B essential modulator |Homo sapiens	1	1	1	1	1	1	0	1	1	1	1	0	1	1	1	0	1818000	972640	516150	277220	570810	756930	0	462740	870790	857330	667270	0	1161300	777800	425990	0
Q8NEZ4	>Q8NEZ4|MLL3_HUMAN Histone-lysine N-methyltransferase MLL3 |Homo sapiens	0	0	1	1	1	1	1	2	0	1	1	1	0	1	1	0	0	0	499030	1278500	2752200	537380	4174000	3171140	0	1111400	1508100	1414300	0	812840	3192800	0
O00410;O60518	>O00410|IPO5_HUMAN Importin-5 |Homo sapiens;>O60518|RNBP6_HUMAN Ran-binding protein 6 |Homo sapiens	1	0	0	0	0	0	0	0	1	0	0	0	0	0	0	0	1235900	0	0	0	0	0	0	0	2975500	0	0	0	0	0	0	0
CON__ENSEMBL:ENSBTAP00000025008	>ENSEMBL:ENSBTAP00000025008 (Bos taurus) hypothetical protein	0	1	2	1	1	1	0	0	1	1	1	1	1	1	1	1	0	744040	87093800	4118500	2846800	13539000	0	0	240510	782700	1832800	3130200	331000	1296400	11593000	29491000
P11142;P54652;P08107;P17066;P48741	>P11142|HSP7C_HUMAN Heat shock cognate 71 kDa protein |Homo sapiens;>P54652|HSP72_HUMAN Heat shock-related 70 kDa protein 2 |Homo sapiens;>P08107|HSP71_HUMAN Heat shock 70 kDa protein 1A/1B |Homo sapiens;>P17066|HSP76_HUMAN Heat shock 70 kDa protein 6 |Hom	2	2	2	2	2	2	2	2	2	2	2	2	2	1	2	2	381587300	298104200	350974000	274445900	310227100	534903000	337646000	256188000	352267500	398677700	499465700	284025200	301237700	359460000	383286000	284314300
Q96RQ3	>Q96RQ3|MCCA_HUMAN Methylcrotonoyl-CoA carboxylase subunit alpha, mitochondrial |Homo sapiens	0	0	2	3	0	0	1	3	0	0	2	2	0	0	0	3	0	0	1258710	6239100	0	0	1152100	10357300	0	0	1936880	3442000	0	0	0	4969100
Q75N03	>Q75N03|HAKAI_HUMAN E3 ubiquitin-protein ligase Hakai |Homo sapiens	3	2	1	0	3	2	0	0	2	3	2	0	3	3	0	0	5584100	1773500	481950	0	2854880	1650030	0	0	1846690	2240870	667380	0	3312530	2407240	0	0
Q96CW1	>Q96CW1|AP2M1_HUMAN AP-2 complex subunit mu |Homo sapiens	8	10	0	4	11	2	4	6	12	10	1	7	11	10	8	3	19099490	23596270	0	3236880	57051800	5326100	3089960	9953810	50345310	27073390	2017100	6130020	55539510	26972840	11367410	3423640
P54577	>P54577|SYYC_HUMAN Tyrosine--tRNA ligase, cytoplasmic |Homo sapiens	15	14	12	7	14	12	12	12	9	11	8	8	12	10	9	6	62795720	36239570	21233270	6980300	64919020	45725200	33569010	27448100	26597340	33387090	19747920	12051290	59977031	53153320	33895330	5405140
P52272	>P52272|HNRPM_HUMAN Heterogeneous nuclear ribonucleoprotein M |Homo sapiens	41	38	40	40	40	41	38	40	38	40	41	41	39	36	37	41	241170740	239330520	231670680	257366810	139796320	324391310	279411600	277731170	165544770	239103160	358341650	290551110	203920240	248804110	2.73214e+08	193375880
P21815	>P21815|SIAL_HUMAN Bone sialoprotein 2 |Homo sapiens	0	0	0	0	0	1	0	0	0	0	0	0	1	0	0	0	0	0	0	0	0	27164000	0	0	0	0	0	0	294170	0	0	0
Q8N8A6	>Q8N8A6|DDX51_HUMAN ATP-dependent RNA helicase DDX51 |Homo sapiens	2	3	1	1	2	2	2	2	3	4	1	2	2	2	2	2	2771300	16459400	1276900	1643300	7798200	4690760	6718600	4944910	5652850	16954000	1318100	4588400	7938100	15108200	11957200	2737320
Q08J23	>Q08J23|NSUN2_HUMAN tRNA (cytosine(34)-C(5))-methyltransferase |Homo sapiens	1	1	1	0	1	1	0	1	1	0	1	1	1	1	1	0	825740	334120	176670	0	600930	453240	0	294820	436230	0	304320	158170	502100	426920	1233700	0
Q8WXI9	>Q8WXI9|P66B_HUMAN Transcriptional repressor p66-beta |Homo sapiens	28	42	42	35	18	40	41	30	23	41	42	33	22	36	37	30	39950458	200636900	201550140	101723400	20138670	267259890	448382150	150703470	19634528	201214570	335589110	109538440	23600390	165642450	238184925	89201090
Q8NCA5	>Q8NCA5|FA98A_HUMAN Protein FAM98A |Homo sapiens	3	3	2	2	2	2	3	3	3	3	2	3	3	2	2	2	8471530	5444719	1351210	1727730	8876700	6480700	3738470	3027230	6537247	4642921	2002500	1659911	8294820	7135800	3648200	1418580
Q14181	>Q14181|DPOA2_HUMAN DNA polymerase alpha subunit B |Homo sapiens	1	1	1	1	2	1	0	0	3	1	1	0	1	1	1	1	2197800	1502000	898450	417760	1717590	1523100	0	0	6871000	1090200	403940	0	1908900	1234700	525070	111890
P06748	>P06748|NPM_HUMAN Nucleophosmin |Homo sapiens	52	51	52	51	55	54	50	52	51	51	51	49	51	39	45	50	2579316030	1484650770	1306353800	832271200	1642692176	2873772776	1717554380	1008183444	1309054420	1130876970	1371291470	685394250	1882513800	1666723723	1202091844	535173290
Q15545	>Q15545|TAF7_HUMAN Transcription initiation factor TFIID subunit 7 |Homo sapiens	0	0	0	1	0	0	0	0	0	0	1	0	0	0	0	0	0	0	0	23419000	0	0	0	0	0	0	222560	0	0	0	0	0
P21333;Q14315;O75369	>P21333|FLNA_HUMAN Filamin-A |Homo sapiens;>Q14315|FLNC_HUMAN Filamin-C |Homo sapiens;>O75369|FLNB_HUMAN Filamin-B |Homo sapiens	5	4	4	4	4	4	4	3	5	3	3	3	4	4	3	3	18522610	16546870	3741240	5726200	26193300	15685000	5860470	5220890	18618710	13535100	3764560	5912160	22230730	13857540	9814000	3794220
P10155	>P10155|RO60_HUMAN 60 kDa SS-A/Ro ribonucleoprotein |Homo sapiens	2	0	0	0	1	1	0	0	1	1	0	0	1	1	0	1	2239870	0	0	0	1468500	820460	0	0	1155100	575670	0	0	1088900	583010	0	429920
Q3ZCM7;A6NNZ2;A6NKZ8;Q9H4B7;P07437;P68371;CON__ENSEMBL:ENSBTAP00000025008;Q9BVA1;Q13885	>Q3ZCM7|TBB8_HUMAN Tubulin beta-8 chain |Homo sapiens;>A6NNZ2|TBB8B_HUMAN Tubulin beta-8 chain B |Homo sapiens;>A6NKZ8|YI016_HUMAN Putative tubulin beta chain-like protein ENSP00000290377 |Homo sapiens;>Q9H4B7|TBB1_HUMAN Tubulin beta-1 chain |Homo sapiens;	1	1	1	1	1	1	1	1	1	1	1	1	1	1	1	1	30610000	35192000	15233000	17049000	6891700	127410000	35717000	40606000	15496000	7413800	109420000	10993000	20721000	62846000	88048000	121540000
Q16643	>Q16643|DREB_HUMAN Drebrin |Homo sapiens	4	3	3	1	3	3	0	0	4	4	2	2	3	3	0	1	4387650	1904240	2023410	579140	2684440	2158750	0	0	4050893	3824620	2365400	542903	2396070	2640890	0	1033900
P61964	>P61964|WDR5_HUMAN WD repeat-containing protein 5 |Homo sapiens	10	11	12	11	10	12	9	9	10	9	10	10	10	9	10	11	44899490	69754110	51670000	47088810	28185350	96469780	70554140	49205130	25512730	64115000	68553030	49047160	34710130	32089700	63520600	41319250
Q9H444	>Q9H444|CHM4B_HUMAN Charged multivesicular body protein 4b |Homo sapiens	1	0	0	0	0	0	0	1	0	0	0	0	1	1	0	0	374920	0	0	0	0	0	0	318600	0	0	0	0	204730	184830	0	0
Q9H0W8	>Q9H0W8|SMG9_HUMAN Protein SMG9 |Homo sapiens	0	4	2	2	1	2	3	2	2	4	3	4	1	3	3	0	0	6813920	812580	1074310	219430	1584180	4130280	1576740	670390	6371280	2305840	2354110	225990	3755140	4749400	0
Q9NR45	>Q9NR45|SIAS_HUMAN Sialic acid synthase |Homo sapiens	5	5	4	4	5	6	5	5	6	5	5	3	5	5	3	1	19434400	12796290	5896220	4834680	16958160	17433980	7366680	6209090	11060070	9606800	5232940	4290710	16976100	11772350	8606900	850690
Q9H160	>Q9H160|ING2_HUMAN Inhibitor of growth protein 2 |Homo sapiens	0	3	3	1	0	2	3	3	0	3	3	3	0	1	2	2	0	4251000	5787500	1056400	0	3693100	5367810	1612540	0	3614300	6286700	1619270	0	1067100	2848400	1237900
P30626	>P30626|SORCN_HUMAN Sorcin |Homo sapiens	1	1	1	1	0	1	0	0	0	1	1	1	2	1	0	0	1748200	959810	805380	565890	0	1752800	0	0	0	1511700	978730	525050	1794440	1367600	0	0
O95983;Q9UBB5	>O95983|MBD3_HUMAN Methyl-CpG-binding domain protein 3 |Homo sapiens;>Q9UBB5|MBD2_HUMAN Methyl-CpG-binding domain protein 2 |Homo sapiens	2	2	2	2	2	2	2	2	2	2	2	2	2	2	2	2	3034000	12286900	15373200	5971700	1964150	28509000	25007000	5269500	2620860	13974700	25628400	5078600	3450130	18831900	19962800	5769300
Q99733	>Q99733|NP1L4_HUMAN Nucleosome assembly protein 1-like 4 |Homo sapiens	11	9	10	8	10	11	10	6	9	9	11	8	10	11	8	6	56572100	24232190	20871680	9384110	33289700	42283160	25221910	11826930	24269020	19364620	15855040	12001210	36229290	28480720	16793200	4679450
Q9NZI8;Q9Y6M1;O00425	>Q9NZI8|IF2B1_HUMAN Insulin-like growth factor 2 mRNA-binding protein 1 |Homo sapiens;>Q9Y6M1|IF2B2_HUMAN Insulin-like growth factor 2 mRNA-binding protein 2 |Homo sapiens;>O00425|IF2B3_HUMAN Insulin-like growth factor 2 mRNA-binding protein 3 |Homo sapien	1	1	1	1	1	1	1	1	1	1	1	1	1	1	0	1	2163700	1711400	1592400	1751100	1875400	2344600	3295600	3296600	664840	1362600	1804700	1505400	1509700	1889900	0	1218000
Q9BPX5	>Q9BPX5|ARP5L_HUMAN Actin-related protein 2/3 complex subunit 5-like protein |Homo sapiens	5	5	4	3	5	5	2	1	6	5	4	4	5	4	4	3	35560400	12223500	7728390	3663460	36408600	22556700	4868600	1380800	17735400	10711870	5915740	4612010	26334800	15106470	7648050	5509080
P46060	>P46060|RAGP1_HUMAN Ran GTPase-activating protein 1 |Homo sapiens	34	37	35	31	29	37	37	35	25	37	37	34	26	37	38	33	122789920	418815600	236898320	137582590	100673690	388334200	338049200	191566940	64350930	327668650	481574460	175459020	92895230	389680730	407178250	153027450
Q15459	>Q15459|SF3A1_HUMAN Splicing factor 3A subunit 1 |Homo sapiens	9	9	9	6	9	8	6	6	9	8	8	8	9	9	7	6	25975610	17695930	23504460	9945110	15955550	17880500	17596900	16439960	12744420	11280540	18719640	10146840	18060140	17177350	13379120	4984710
Q9UKL0	>Q9UKL0|RCOR1_HUMAN REST corepressor 1 |Homo sapiens	3	3	4	4	4	4	3	3	2	3	4	4	2	2	3	4	6708500	5213390	5838720	6168260	8531680	9816000	11489500	10130400	2681400	5227010	7867570	6824480	4028200	5126800	4043600	7069890
Q9Y3C7	>Q9Y3C7|MED31_HUMAN Mediator of RNA polymerase II transcription subunit 31 |Homo sapiens	0	0	0	1	0	0	0	1	0	0	0	1	0	0	0	1	0	0	0	93175	0	0	0	292150	0	0	0	313710	0	0	0	220010
Q9NVP2	>Q9NVP2|ASF1B_HUMAN Histone chaperone ASF1B |Homo sapiens	1	1	0	0	1	1	1	0	0	0	0	0	0	0	0	0	893150	817840	0	0	1212400	2132100	932100	0	0	0	0	0	0	0	0	0
P30876	>P30876|RPB2_HUMAN DNA-directed RNA polymerase II subunit RPB2 |Homo sapiens	14	33	28	31	22	17	34	33	21	31	27	33	24	26	35	33	17571381	87583058	30802166	103131260	30788030	22671570	193820900	180220890	25135042	66085246	43758736	136472980	23581004	61329940	2.12108e+08	89839020
Q9NZL9	>Q9NZL9|MAT2B_HUMAN Methionine adenosyltransferase 2 subunit beta |Homo sapiens	27	25	23	16	29	24	18	16	25	27	20	13	26	26	16	12	482691070	197347980	96131790	54695550	437582500	274636350	96780760	55116160	263659460	165890090	109471070	25164050	341160410	206850010	78960800	22959060
Q13547	>Q13547|HDAC1_HUMAN Histone deacetylase 1 |Homo sapiens	17	25	25	23	22	24	23	21	15	24	23	23	19	20	21	16	57780510	210981620	133416750	61512251	63579240	198257420	208250630	113391500	51873260	186290510	255755410	96311570	57457219	127141100	96123921	59385450
P28838	>P28838|AMPL_HUMAN Cytosol aminopeptidase |Homo sapiens	58	63	58	54	54	63	54	47	54	61	60	49	58	52	55	47	568432490	1560567110	589071510	208557530	426998711	1663410450	800797300	255482660	399563150	1573088080	832280870	187884320	569831120	1358861290	696590750	148053503
P41227	>P41227|NAA10_HUMAN N-alpha-acetyltransferase 10 |Homo sapiens	12	12	11	10	11	10	9	10	10	10	9	7	11	10	5	7	82469640	38548840	29134060	16583980	47623900	35351500	21811300	15558550	26077010	25911420	25014410	9412580	49857620	35038130	12014580	4143120
Q9H9C1	>Q9H9C1|VIPAR_HUMAN VPS33B-interacting protein |Homo sapiens	1	0	0	0	0	0	0	0	0	0	0	0	0	0	0	0	1265000	0	0	0	0	0	0	0	0	0	0	0	0	0	0	0
P35573	>P35573|GDE_HUMAN Glycogen debranching enzyme |Homo sapiens	1	1	0	0	2	0	0	1	3	3	0	3	4	3	2	0	588860	4296500	0	0	9524300	0	0	2272300	5006490	9454980	0	2187440	7749130	4316640	2028040	0
Q92945;Q96AE4	>Q92945|FUBP2_HUMAN Far upstream element-binding protein 2 |Homo sapiens;>Q96AE4|FUBP1_HUMAN Far upstream element-binding protein 1 |Homo sapiens	3	2	2	2	3	1	2	4	3	3	3	2	3	2	3	2	16184900	7605500	8381800	5399930	8297320	16101000	7617600	6619000	7721950	8607310	7844400	3019650	10564200	4546270	13534640	5048980
P62140	>P62140|PP1B_HUMAN Serine/threonine-protein phosphatase PP1-beta catalytic subunit |Homo sapiens	2	2	2	2	2	2	2	2	2	2	2	2	2	2	1	2	6081300	2271860	1760260	1614580	4738800	3723800	3174600	2204000	3676100	3197340	2237800	1540170	6335900	2949650	1231300	1071890
P47888;P47893	>P47888|OR3A3_HUMAN Olfactory receptor 3A3 |Homo sapiens;>P47893|OR3A2_HUMAN Olfactory receptor 3A2 |Homo sapiens	0	1	1	1	1	1	1	1	0	1	1	1	0	0	0	1	0	462760	615080	956160	1300900	1561200	3879100	3565500	0	1069000	1406800	1587800	0	0	0	2010800
Q5TAQ9	>Q5TAQ9|DCAF8_HUMAN DDB1- and CUL4-associated factor 8 |Homo sapiens	9	9	9	8	9	8	5	6	8	9	9	7	9	9	6	4	33074060	28092400	20797640	14050580	29605850	24684090	14160920	12778270	17673610	30278020	21870110	10036280	36167140	21059820	10561510	4283290
Q05639	>Q05639|EF1A2_HUMAN Elongation factor 1-alpha 2 |Homo sapiens	1	1	1	1	1	1	0	0	1	1	1	1	1	1	0	0	2029100	2750400	1059600	456020	2690000	1920600	0	0	1563300	2316500	1335400	941610	1672500	2427600	0	0
Q8WXF1	>Q8WXF1|PSPC1_HUMAN Paraspeckle component 1 |Homo sapiens	5	3	4	5	4	3	4	4	5	4	5	3	4	5	4	4	17658000	3826130	8219490	6062370	7178080	8960560	9671720	6813710	8475050	4861200	7219600	4070210	6436859	14163320	7479500	4622070
P38606	>P38606|VATA_HUMAN V-type proton ATPase catalytic subunit A |Homo sapiens	23	28	28	22	19	26	23	21	18	27	27	17	18	26	23	17	87410570	238117610	99300300	57714810	72563970	203503720	152573450	67299750	59893170	237532240	132066040	55293790	73767590	173216450	125687750	42485810
P41227;Q9BSU3	>P41227|NAA10_HUMAN N-alpha-acetyltransferase 10 |Homo sapiens;>Q9BSU3|NAA11_HUMAN N-alpha-acetyltransferase 11 |Homo sapiens	4	4	4	4	5	4	4	4	3	4	4	3	5	4	3	3	22302300	8466910	8577510	3546680	10163700	13393500	5055680	3850840	6209420	7992560	6329260	4434910	16462460	7585140	3584560	2094700
P04350	>P04350|TBB4A_HUMAN Tubulin beta-4A chain |Homo sapiens	4	3	4	5	4	3	4	4	4	4	4	4	3	4	4	3	58938060	18250660	119468800	207718900	48386240	22424900	105764400	147877700	53460050	52222740	191212200	126536500	56334600	122857800	72386400	12615300
P22392;O60361	>P22392|NDKB_HUMAN Nucleoside diphosphate kinase B |Homo sapiens;>O60361|NDK8_HUMAN Putative nucleoside diphosphate kinase |Homo sapiens	6	6	5	5	8	6	5	4	6	6	6	4	6	5	6	5	107024400	30167480	8195740	4418974	54549900	60106360	10515830	5205000	63843560	31457730	31007960	4239390	75170800	67052500	3.76858e+07	11038710
P52294;O60684;O15131	>P52294|IMA1_HUMAN Importin subunit alpha-1 |Homo sapiens;>O60684|IMA7_HUMAN Importin subunit alpha-7 |Homo sapiens;>O15131|IMA5_HUMAN Importin subunit alpha-6 |Homo sapiens	1	2	1	2	2	2	2	2	1	1	1	2	1	2	2	2	2459500	5398900	1489400	2308270	5734500	4274600	7419000	7696300	3015300	4556000	2258400	3209130	3608600	5565240	7172500	4274400
O43707;P35609	>O43707|ACTN4_HUMAN Alpha-actinin-4 |Homo sapiens;>P35609|ACTN2_HUMAN Alpha-actinin-2 |Homo sapiens	0	0	0	1	1	1	1	1	0	0	0	1	0	1	1	1	0	0	0	559230	1271600	2185100	884260	368890	0	0	0	557350	0	405620	1196900	485080
Q93008	>Q93008|USP9X_HUMAN Probable ubiquitin carboxyl-terminal hydrolase FAF-X |Homo sapiens	13	18	0	4	20	6	6	6	24	14	0	9	21	13	8	5	16740450	30006410	0	13822340	69929610	2964420	5357680	6828260	91158610	109493350	0	38070320	56333420	28702160	10305490	4232710
P18583	>P18583|SON_HUMAN Protein SON |Homo sapiens	2	4	5	5	2	5	4	4	2	5	5	5	3	4	5	4	470730	1798930	4508350	6275450	1642680	4940700	4865250	6552240	490220	4038370	8829370	11030400	2296390	2858450	8018790	5107140
Q9H0A8	>Q9H0A8|COMD4_HUMAN COMM domain-containing protein 4 |Homo sapiens	3	3	2	0	3	3	1	1	3	3	1	1	3	3	1	1	7233700	13127600	1658620	0	11627700	10215800	3432900	1147700	6403100	17533500	1954000	944960	11275300	11437000	2423700	828680
P06744;CON__Q3ZBD7	>P06744|G6PI_HUMAN Glucose-6-phosphate isomerase |Homo sapiens;>Q3ZBD7 SWISS-PROT:Q3ZBD7 (Bos taurus) Glucose-6-phosphate isomerase	4	4	2	4	7	6	7	6	5	4	2	4	5	4	5	6	30238300	18729000	1062060	3565830	161038800	11299810	32977910	10910410	22247100	15435650	1033970	9262050	23185200	25250300	30756616	15902930
Q9NQA3;A8MWX3	>Q9NQA3|WASH6_HUMAN WAS protein family homolog 6 |Homo sapiens;>A8MWX3|WASH4_HUMAN Putative WAS protein family homolog 4 |Homo sapiens	1	1	0	1	0	1	1	0	0	0	0	0	0	0	1	1	3357300	217100	0	490250	0	2548700	405270	0	0	0	0	0	0	0	1715300	255360
A5YKK6	>A5YKK6|CNOT1_HUMAN CCR4-NOT transcription complex subunit 1 |Homo sapiens	3	23	4	26	8	3	26	28	11	20	4	29	11	18	27	28	779330	31368850	1039076	52801430	7585230	2598880	91051440	106037980	5535430	26469650	3195770	105260780	6318120	20228190	100668500	77333170
P05204;O00479	>P05204|HMGN2_HUMAN Non-histone chromosomal protein HMG-17 |Homo sapiens;>O00479|HMGN4_HUMAN High mobility group nucleosome-binding domain-containing protein 4 |Homo sapiens	0	0	0	0	1	0	1	1	0	0	0	0	0	0	0	1	0	0	0	0	860310	0	2074300	2029600	0	0	0	0	0	0	0	1674900
P52292	>P52292|IMA2_HUMAN Importin subunit alpha-2 |Homo sapiens	18	19	19	18	19	17	17	16	19	18	18	18	18	17	17	15	116823950	158999600	56973510	45381250	104248350	93685520	88448250	67911620	153329750	165521000	137254640	75261730	152831180	163272090	136769187	39889110
O75083	>O75083|WDR1_HUMAN WD repeat-containing protein 1 |Homo sapiens	2	2	2	1	2	2	0	0	3	2	2	2	2	1	1	0	3259300	2586800	955300	576330	2705400	3717530	0	0	3611700	1699770	1540370	940760	1720920	832830	15314	0
P06733	>P06733|ENOA_HUMAN Alpha-enolase |Homo sapiens	45	43	45	40	44	44	42	40	40	40	38	35	40	37	36	37	1173565090	683226520	587929380	306865180	657451250	836493900	476396480	324468690	632447100	425225700	381066750	245134740	562741250	426073490	320988070	175257040
Q8IYT4	>Q8IYT4|KATL2_HUMAN Katanin p60 ATPase-containing subunit A-like 2 |Homo sapiens	1	1	1	1	1	1	1	1	1	1	1	1	1	1	1	1	1004600	15427000	170930000	146980000	567170	9699000	218320000	258910000	550420	6704700	244410000	162420000	758500	12471000	134810000	102120000
P00338	>P00338|LDHA_HUMAN L-lactate dehydrogenase A chain |Homo sapiens	28	26	21	21	30	27	28	28	26	27	22	24	28	26	25	22	1066027000	732635410	155126510	212405440	1475576600	417782600	516844950	479484580	1390386180	517045330	178086590	247727970	1335375560	635835170	357119180	138628520
O60832	>O60832|DKC1_HUMAN H/ACA ribonucleoprotein complex subunit 4 |Homo sapiens	11	13	5	7	13	6	8	10	14	10	3	9	10	8	8	2	41596950	39872160	4240550	8348350	84220010	15666260	23750440	18573840	68145470	30281240	3300540	10556550	46917750	30716990	15676920	2083230
Q15366	>Q15366|PCBP2_HUMAN Poly(rC)-binding protein 2 |Homo sapiens	5	5	5	5	5	5	5	5	5	5	5	5	5	5	3	5	26981500	29392500	29702900	36360400	20716470	38941600	60139400	47583200	14752910	19929500	24820600	24715200	25800970	33946000	17731300	16526300
O43663	>O43663|PRC1_HUMAN Protein regulator of cytokinesis 1 |Homo sapiens	0	0	0	0	0	1	0	0	1	0	0	0	0	0	0	0	0	0	0	0	0	6181600	0	0	607190	0	0	0	0	0	0	0
Q8IZP0;Q9NYB9	>Q8IZP0|ABI1_HUMAN Abl interactor 1 |Homo sapiens;>Q9NYB9|ABI2_HUMAN Abl interactor 2 |Homo sapiens	4	4	2	2	4	4	3	1	4	4	3	3	4	4	4	3	19257700	10364940	3569020	2164870	16110370	10665320	5964060	4680700	10246560	10011100	5831960	1770630	22134200	15140000	4368220	2645750
P49792;O14715;A6NKT7	>P49792|RBP2_HUMAN E3 SUMO-protein ligase RanBP2 |Homo sapiens;>O14715|RGPD8_HUMAN RANBP2-like and GRIP domain-containing protein 8 |Homo sapiens;>A6NKT7|RGPD3_HUMAN RanBP2-like and GRIP domain-containing protein 3 |Homo sapiens	1	1	1	1	1	1	1	1	1	1	1	1	1	1	1	0	894630	5630100	1282400	2111000	2303500	4254100	5263400	4380400	1166000	6120400	2305500	3060500	1153100	3239400	5419700	0
P24941	>P24941|CDK2_HUMAN Cyclin-dependent kinase 2 |Homo sapiens	1	1	1	1	1	1	1	1	1	1	1	1	1	1	1	1	1569900	1149600	325930	917470	1668100	1069300	1632700	1342600	1394000	1325000	349180	585540	1330000	1506800	1167900	396340
Q70CQ1	>Q70CQ1|UBP49_HUMAN Ubiquitin carboxyl-terminal hydrolase 49 |Homo sapiens	1	0	0	1	1	1	0	0	0	0	1	1	1	1	1	1	598680	0	0	179740	1190300	1911700	0	0	0	0	428550	525210	17353	619320	2353100	3266000
P49773	>P49773|HINT1_HUMAN Histidine triad nucleotide-binding protein 1 |Homo sapiens	2	3	3	3	2	3	3	3	2	3	3	3	2	3	3	2	18564700	9053500	11691460	11080910	10313100	12144210	17040500	9644170	5296560	8291800	10858400	7674090	6202990	8142600	6682900	4113900
P09960	>P09960|LKHA4_HUMAN Leukotriene A-4 hydrolase |Homo sapiens	2	4	2	2	3	3	2	3	4	4	0	2	4	2	3	0	6816500	12008000	2660830	4275220	19169100	5503570	4548810	6612000	8510420	6675600	0	4748770	16668660	7887400	4185990	0
Q8ND04	>Q8ND04|SMG8_HUMAN Protein SMG8 |Homo sapiens	1	1	1	0	0	1	1	1	0	1	1	1	0	0	1	0	486640	2467100	301530	0	0	688010	1162800	1173200	0	2318200	445590	651230	0	0	2501600	0
Q13098	>Q13098|CSN1_HUMAN COP9 signalosome complex subunit 1 |Homo sapiens	21	19	11	12	23	13	15	14	24	21	7	14	23	18	15	10	103248920	128360320	7896030	17943790	176813120	29839190	35628520	36696050	164530930	109741070	7996170	22808300	162116590	100987490	37666380	13130200
REV__P42285	>P42285|SK2L2_HUMAN Superkiller viralicidic activity 2-like 2 |Homo sapiens	1	1	1	1	1	1	1	1	1	1	1	1	1	1	2	1	55602000	40151000	7539900	13721000	61733000	64523000	44314000	14660000	44204000	34828000	8760600	19592000	74112000	55156000	87180100	15592000
Q8WTW3	>Q8WTW3|COG1_HUMAN Conserved oligomeric Golgi complex subunit 1 |Homo sapiens	3	8	0	4	7	2	4	5	8	8	1	6	7	6	6	3	770620	19868490	0	3343140	9076280	1638700	4209510	5893610	11312710	23631730	165420	4375293	7185710	13535200	14953000	2200600
P07900;Q14568;P08238;Q58FF7;Q58FF8	>P07900|HS90A_HUMAN Heat shock protein HSP 90-alpha |Homo sapiens;>Q14568|HS902_HUMAN Putative heat shock protein HSP 90-alpha A2 |Homo sapiens;>P08238|HS90B_HUMAN Heat shock protein HSP 90-beta |Homo sapiens;>Q58FF7|H90B3_HUMAN Putative heat shock protein	1	1	0	0	1	1	0	0	0	0	0	0	0	0	0	0	240410	212940	0	0	551640	822790	0	0	0	0	0	0	0	0	0	0
Q96SU4	>Q96SU4|OSBL9_HUMAN Oxysterol-binding protein-related protein 9 |Homo sapiens	1	1	0	0	1	1	0	1	1	1	1	1	1	1	1	0	1157000	717060	0	0	1523200	514950	0	404290	1293700	1298900	266520	159780	1773000	870030	468150	0
Q9H2P0	>Q9H2P0|ADNP_HUMAN Activity-dependent neuroprotector homeobox protein |Homo sapiens	4	3	3	1	3	3	1	1	4	4	3	1	4	3	2	1	5260600	1536730	1037420	244090	4183700	2224360	397380	465010	3351840	2770330	1196360	192140	2464020	1492070	764640	410840
Q00341	>Q00341|VIGLN_HUMAN Vigilin |Homo sapiens	4	1	1	1	4	4	1	3	3	3	1	0	3	5	1	2	4183930	993100	190110	683100	2848120	4403230	1634000	1846500	1433200	1137120	439370	0	2309000	2899810	1316900	1349540
Q86X10	>Q86X10|RLGPB_HUMAN Ral GTPase-activating protein subunit beta |Homo sapiens	0	4	2	1	1	0	3	2	1	3	1	4	3	1	3	2	0	3754370	2281250	676750	66003	0	4129960	638030	312580	2559540	1842300	6218140	1753136	1655000	4502861	1661610
P40227;Q92526	>P40227|TCPZ_HUMAN T-complex protein 1 subunit zeta |Homo sapiens;>Q92526|TCPW_HUMAN T-complex protein 1 subunit zeta-2 |Homo sapiens	2	3	4	5	0	2	2	5	2	2	5	5	1	2	2	5	2733540	2479690	3392530	12978500	0	2309900	2259000	10565870	2124410	1733370	14295258	14037050	2084900	2521950	2060410	6598020
Q9BT25	>Q9BT25|HAUS8_HUMAN HAUS augmin-like complex subunit 8 |Homo sapiens	4	5	5	5	4	4	2	3	4	4	4	3	3	3	3	3	12071200	9454030	9388680	9291900	7680790	11580500	9938100	7264050	6874670	8460190	10542620	4974830	11431170	10292000	7286570	5099120
Q9H773	>Q9H773|DCTP1_HUMAN dCTP pyrophosphatase 1 |Homo sapiens	6	5	6	5	5	6	4	4	4	5	4	5	6	4	4	3	21781950	12423870	8819990	8091010	14519220	29727060	11022570	5944400	7876460	10234340	8453500	6210710	12360734	12090130	10943600	4941760
Q9NV70	>Q9NV70|EXOC1_HUMAN Exocyst complex component 1 |Homo sapiens	7	9	4	4	6	4	7	7	8	9	7	5	8	9	5	3	9459280	31499020	2182540	4134960	14958200	4801950	10200250	9361470	25300030	43889600	7546140	5772930	26139100	31163010	12043700	2083260
P49815	>P49815|TSC2_HUMAN Tuberin |Homo sapiens	1	4	0	1	3	0	2	3	3	4	0	2	4	4	2	0	993220	5854520	0	357440	2837030	0	1171280	2239140	2556300	8315360	0	1850920	2612960	6124950	3462800	0
REV__O14802	>O14802|RPC1_HUMAN DNA-directed RNA polymerase III subunit RPC1 |Homo sapiens	1	1	1	1	1	1	1	1	1	1	1	1	1	0	1	1	2439100	1792200	4739400	3826000	2186700	7139000	775800	4365900	763260	1840900	3429400	4021300	2133500	0	870680	4114100
Q7Z5P9	>Q7Z5P9|MUC19_HUMAN Mucin-19 |Homo sapiens	2	1	2	1	2	1	1	2	1	2	1	2	1	1	1	1	115539000	119970000	268872000	257150000	117724000	90239000	556110000	509331000	92601000	137886370	139110000	197683000	50983000	113690000	132720000	50880000
REV__Q9BYZ8	>Q9BYZ8|REG4_HUMAN Regenerating islet-derived protein 4 |Homo sapiens	1	1	1	1	1	1	1	1	1	1	1	1	0	1	1	1	799410	2505300	16417000	24782000	1636700	2502600	17366000	25421000	2334200	2176800	26322000	20294000	0	2246400	13610000	4802800
P62829	>P62829|RL23_HUMAN 60S ribosomal protein L23 |Homo sapiens	1	1	1	1	1	1	1	1	1	0	1	1	1	1	1	1	953280	623680	349590	482880	1219100	2225600	1721300	1642700	389840	0	1530500	593760	1014400	1107200	1482100	1259500
Q9Y3D0	>Q9Y3D0|MIP18_HUMAN Mitotic spindle-associated MMXD complex subunit MIP18 |Homo sapiens	1	1	1	0	1	1	0	0	2	1	1	1	1	1	1	1	3030000	373980	637050	0	3342000	2802700	0	0	5564800	438930	782350	453880	1787600	1209000	1327200	486200
CON__Q6IME9	>Q6IME9 TREMBL:Q6IME9 Tax_Id=10090 Gene_Symbol=Krt72 Type-II keratin Kb35	1	1	1	1	1	1	0	1	0	1	1	1	1	1	1	1	1273800	854510	586420	652060	4452900	8532100	0	5007400	0	518840	413310	440650	431500	318450	401870	8732500
P38919	>P38919|IF4A3_HUMAN Eukaryotic initiation factor 4A-III |Homo sapiens	2	2	2	2	2	2	2	2	2	1	2	2	2	2	2	2	2503620	1741150	1771790	2005120	1984500	2747380	4107400	4894400	1270070	1174400	1605980	1584240	1624960	1731450	3003850	1291680
O14818	>O14818|PSA7_HUMAN Proteasome subunit alpha type-7 |Homo sapiens	12	12	13	20	11	14	11	18	10	11	11	20	11	8	5	20	28225180	23402079	11732560	146346170	22247820	36253680	19373660	117716100	15076632	19081370	15115850	197925650	17230750	12495550	6717070	112835500
Q14669	>Q14669|TRIPC_HUMAN Probable E3 ubiquitin-protein ligase TRIP12 |Homo sapiens	0	0	0	0	1	0	0	0	1	0	0	0	1	0	0	0	0	0	0	0	297360	0	0	0	279730	0	0	0	293290	0	0	0
Q8NC51	>Q8NC51|PAIRB_HUMAN Plasminogen activator inhibitor 1 RNA-binding protein |Homo sapiens	7	6	6	5	5	6	5	5	6	6	6	6	5	3	5	4	23271370	16678230	13466080	9808030	10800200	22490960	17452500	22642700	19350930	18666280	16142470	8544920	18369050	7101900	12069300	4684180
Q9UI30	>Q9UI30|TR112_HUMAN tRNA methyltransferase 112 homolog |Homo sapiens	3	3	3	3	3	3	2	1	3	3	3	3	3	3	2	2	7189500	4053010	3469830	3023220	4538850	8016000	5074500	1590600	2054340	3574530	4513500	2987440	4968800	5454600	3556500	2930200
Q96N67;Q96HP0	>Q96N67|DOCK7_HUMAN Dedicator of cytokinesis protein 7 |Homo sapiens;>Q96HP0|DOCK6_HUMAN Dedicator of cytokinesis protein 6 |Homo sapiens	0	2	1	2	2	1	2	2	0	2	0	2	2	2	2	2	0	8117500	205730	1849210	1794000	915850	3782800	4310300	0	4856500	0	2557540	577370	4330900	4977900	2279550
P49756	>P49756|RBM25_HUMAN RNA-binding protein 25 |Homo sapiens	5	3	3	3	4	4	2	3	1	3	2	3	2	2	1	3	8310990	2274774	1620080	1304568	4035360	5996720	2503810	1492640	740440	2220346	998290	1404148	3096700	3408200	1972400	1432900
Q13200	>Q13200|PSMD2_HUMAN 26S proteasome non-ATPase regulatory subunit 2 |Homo sapiens	5	15	15	31	16	11	25	33	7	17	19	32	11	14	22	31	4170650	39287640	13117200	231043220	14039160	51180120	145965550	430824950	10411550	35753380	32554650	416498540	14778990	33152070	134758190	198638180
Q8N726	>Q8N726|CD2A2_HUMAN Cyclin-dependent kinase inhibitor 2A, isoform 4 |Homo sapiens	0	1	1	1	1	0	1	1	1	1	1	1	0	0	1	1	0	2191700	537630	2496200	1076700	0	2678700	4818900	1281600	1678100	993730	3992100	0	0	2926400	2592700
P29692	>P29692|EF1D_HUMAN Elongation factor 1-delta |Homo sapiens	41	44	46	44	44	44	44	38	35	43	41	38	38	38	43	42	1359099440	2880249180	2104322900	861496910	1071029630	3646513900	2092651990	809368520	583473640	3096996760	2126814260	737361980	896572851	2576991190	2172692300	673536890
Q05048	>Q05048|CSTF1_HUMAN Cleavage stimulation factor subunit 1 |Homo sapiens	21	20	19	19	20	19	16	19	20	20	19	16	21	20	15	11	175443100	78538600	41378460	26865640	111348300	81577100	46844700	33216110	104279670	68605990	43333060	16919980	117173320	84778800	28202260	12750490
P13716	>P13716|HEM2_HUMAN Delta-aminolevulinic acid dehydratase |Homo sapiens	2	2	2	1	2	2	2	2	2	2	2	2	2	2	2	1	8232000	14727200	3489500	1514400	8702800	13164800	6990800	3914430	7545000	13074100	5633000	1663330	9070700	21282600	8439400	1872000
O15381	>O15381|NVL_HUMAN Nuclear valosin-containing protein-like |Homo sapiens	2	2	2	0	2	1	1	1	2	2	2	2	2	2	0	1	1012820	1106030	649220	0	679470	572770	467610	323520	778090	1556050	1332190	992530	846970	1109070	0	253420
P26368	>P26368|U2AF2_HUMAN Splicing factor U2AF 65 kDa subunit |Homo sapiens	6	5	5	4	8	7	5	3	5	5	5	4	5	5	4	7	25715100	15087400	10473960	5006950	14400450	21456200	13594500	6211300	13267230	8694100	9466500	5378890	19123800	10044410	10467220	4059407
P05166	>P05166|PCCB_HUMAN Propionyl-CoA carboxylase beta chain, mitochondrial |Homo sapiens	0	1	0	3	0	1	0	3	0	0	1	3	0	1	0	2	0	174580	0	1641970	0	155450	0	4513710	0	0	412680	3899830	0	362200	0	579790
Q9NR30;Q9BQ39	>Q9NR30|DDX21_HUMAN Nucleolar RNA helicase 2 |Homo sapiens;>Q9BQ39|DDX50_HUMAN ATP-dependent RNA helicase DDX50 |Homo sapiens	1	1	1	1	1	1	1	1	1	1	1	1	1	1	1	1	1860600	1681100	962950	577710	3289600	2837500	1967000	2257200	2387300	2047100	1431800	840200	2640500	2429300	1720700	766180
P52209	>P52209|6PGD_HUMAN 6-phosphogluconate dehydrogenase, decarboxylating |Homo sapiens	8	8	5	6	10	6	6	8	8	8	4	8	8	6	6	5	24572000	28143640	5007221	7173870	54708250	7474480	26139540	16999440	34652310	29044370	3046100	10697190	33926940	22991110	16835840	4320510
Q9P000	>Q9P000|COMD9_HUMAN COMM domain-containing protein 9 |Homo sapiens	7	7	6	2	6	6	7	4	6	7	6	2	7	6	7	4	18131790	32988000	8568380	2391200	12941330	27692310	17746610	3902390	10744750	39606700	8748880	2372590	20077590	29278300	18484050	7619470
Q8WUM0	>Q8WUM0|NU133_HUMAN Nuclear pore complex protein Nup133 |Homo sapiens	2	15	10	12	13	9	19	16	11	17	11	12	12	15	16	15	2098200	98964270	10060300	26521000	20612970	19872030	69366720	51020980	18769740	88898370	19452300	45299550	20886130	83560850	92973600	32445720
O43242	>O43242|PSMD3_HUMAN 26S proteasome non-ATPase regulatory subunit 3 |Homo sapiens	16	22	13	27	23	8	23	29	22	25	10	31	22	18	23	27	29907130	63040090	7150481	117762290	70374620	10938100	84544620	195551890	67972870	77890000	7705780	195205740	54801566	51044750	80824745	100083260
Q13330	>Q13330|MTA1_HUMAN Metastasis-associated protein MTA1 |Homo sapiens	5	13	12	8	2	11	12	11	8	13	13	9	5	11	10	8	3809690	32246010	21522870	8676680	1087230	30182830	43453800	21597050	8042750	39323800	43441790	10806030	3356928	34575060	32303490	8686710
Q15532	>Q15532|SSXT_HUMAN Protein SSXT |Homo sapiens	0	1	3	3	2	2	3	2	0	1	3	2	0	2	2	3	0	237060	6057000	4274720	435880	1048210	3940150	3741700	0	399320	4654800	1516700	0	516820	5289900	5312990
P25205	>P25205|MCM3_HUMAN DNA replication licensing factor MCM3 |Homo sapiens	33	31	33	28	33	28	27	25	30	31	31	27	32	29	24	20	291243600	130876950	79605390	44499260	196491370	106480680	86727920	61853680	114925800	106021320	71025090	39685760	184184112	111683450	65753116	30714440
Q4LE39	>Q4LE39|ARI4B_HUMAN AT-rich interactive domain-containing protein 4B |Homo sapiens	3	5	6	4	3	5	5	3	0	4	5	2	1	4	3	0	285655	3441560	3205280	835860	647500	3923230	3600670	1391690	0	2170980	4353470	480240	282370	2372910	2671805	0
P33991	>P33991|MCM4_HUMAN DNA replication licensing factor MCM4 |Homo sapiens	102	103	99	87	100	104	93	88	101	104	100	83	102	97	96	85	2071668520	2884393810	1256794868	604161120	1646468480	2507059400	1533784130	833197905	1749617750	3002246470	1922151040	641665600	1822758695	2655214340	1224902800	421038260
O60293	>O60293|ZC3H1_HUMAN Zinc finger C3H1 domain-containing protein |Homo sapiens	0	2	0	0	1	0	0	1	1	1	0	1	1	2	1	0	0	1258310	0	0	1883500	0	0	220440	408530	709460	0	178050	423120	603780	526290	0
Q96LB3	>Q96LB3|IFT74_HUMAN Intraflagellar transport protein 74 homolog |Homo sapiens	2	2	3	3	2	2	3	3	1	2	3	3	2	2	3	3	1612410	3132000	5791500	3885420	1593960	2703670	7627200	3326960	1105400	2406570	7937200	3542740	1829750	2004710	5530600	2900740
Q99873	>Q99873|ANM1_HUMAN Protein arginine N-methyltransferase 1 |Homo sapiens	28	28	25	24	28	27	26	27	28	27	22	24	28	28	24	20	569477400	420104800	86541590	91890550	618140600	250734000	193934510	126912810	523848950	322027700	90289650	82509010	463488260	333190250	141267180	52905210
O15042	>O15042|SR140_HUMAN U2 snRNP-associated SURP motif-containing protein |Homo sapiens	7	7	7	6	9	6	7	6	9	7	5	3	8	5	4	3	18395520	12076840	4196350	3175850	27574790	8488450	9425080	5279170	22289730	10853210	2407280	1878270	24834210	8208480	11362600	1346800
Q99707	>Q99707|METH_HUMAN Methionine synthase |Homo sapiens	2	2	2	0	2	1	1	1	2	2	1	2	2	2	0	0	1296180	1093140	537290	0	1470700	770490	551650	596450	1174680	820310	395980	627860	990120	867220	0	0
A0JLT2	>A0JLT2|MED19_HUMAN Mediator of RNA polymerase II transcription subunit 19 |Homo sapiens	0	0	1	2	0	0	0	2	0	0	2	2	0	0	0	2	0	0	449580	4597600	0	0	0	5421800	0	0	1175690	4471300	0	0	0	2336500
Q9NZM4	>Q9NZM4|GSCR1_HUMAN Glioma tumor suppressor candidate region gene 1 protein |Homo sapiens	1	1	1	0	1	0	0	0	1	1	1	0	1	1	1	0	1366000	882720	346450	0	1268700	0	0	0	672350	1683300	607820	0	1011400	1306800	646180	0
Q9H7L9	>Q9H7L9|SDS3_HUMAN Sin3 histone deacetylase corepressor complex component SDS3 |Homo sapiens	4	5	5	4	4	5	5	5	2	5	5	4	4	3	3	4	6878860	18009500	18188900	7205200	4685270	23538500	22683900	9437880	4175710	16849400	30046000	6923970	4755430	11403500	9878700	4000620
P63241;Q6IS14	>P63241|IF5A1_HUMAN Eukaryotic translation initiation factor 5A-1 |Homo sapiens;>Q6IS14|IF5AL_HUMAN Eukaryotic translation initiation factor 5A-1-like |Homo sapiens	2	2	2	2	2	2	2	2	2	2	2	2	2	2	2	2	6174000	5606400	5858500	7788200	7347600	12932600	11684700	12557700	5058870	5485460	7514200	4801480	6573540	7046100	5698400	4383000
O75717	>O75717|WDHD1_HUMAN WD repeat and HMG-box DNA-binding protein 1 |Homo sapiens	20	17	8	6	21	13	8	11	20	15	5	9	21	14	6	5	54411670	29671383	10089090	6036030	65659650	14115640	7036590	13696320	58135970	30702706	5644350	14739140	70578480	33871520	10851460	4795491
P98179	>P98179|RBM3_HUMAN Putative RNA-binding protein 3 |Homo sapiens	0	0	0	0	0	1	1	1	0	0	0	0	0	0	0	0	0	0	0	0	0	1129100	859340	756640	0	0	0	0	0	0	0	0
Q9HAS0	>Q9HAS0|NJMU_HUMAN Protein Njmu-R1 |Homo sapiens	1	2	1	1	1	1	0	1	1	1	1	1	1	2	1	0	699560	6627840	453900	518870	1126000	558560	0	509740	3147200	3953700	877410	584310	2187600	3726920	839530	0
REV__P35579	>P35579|MYH9_HUMAN Myosin-9 |Homo sapiens	0	1	1	1	1	0	2	1	1	1	2	1	1	0	0	1	0	9191700	3861000	5854100	409240	0	13428500	12379000	6572300	8000200	2722930	3032400	9940500	0	0	6840800
Q8IY82	>Q8IY82|CC135_HUMAN Coiled-coil domain-containing protein lobo homolog |Homo sapiens	0	0	0	0	1	0	0	1	0	0	0	0	1	0	1	1	0	0	0	0	850450	0	0	8107100	0	0	0	0	7730800	0	7553200	3453300
Q99627	>Q99627|CSN8_HUMAN COP9 signalosome complex subunit 8 |Homo sapiens	7	7	7	7	6	6	6	6	7	7	7	7	7	6	6	4	131722800	74388300	31817400	18553000	80221800	98728700	36030800	15534100	92455100	70828100	34073100	13525270	110263500	71923800	31468600	13026600
Q9H633	>Q9H633|RPP21_HUMAN Ribonuclease P protein subunit p21 |Homo sapiens	2	0	4	4	0	0	4	4	0	1	4	4	0	0	1	4	717500	0	4183660	25686500	0	0	6953580	27888000	0	349040	8747000	17173800	0	0	1282200	25168200
Q9Y4E1;Q641Q2	>Q9Y4E1|FA21C_HUMAN WASH complex subunit FAM21C |Homo sapiens;>Q641Q2|FA21A_HUMAN WASH complex subunit FAM21A |Homo sapiens	1	1	1	0	1	1	1	0	1	1	0	0	1	0	1	0	11202000	8444800	3130600	0	6047300	420760	3946900	0	6415000	8604200	0	0	7568600	0	2399100	0
Q8NFW8	>Q8NFW8|NEUA_HUMAN N-acylneuraminate cytidylyltransferase |Homo sapiens	1	1	1	1	1	1	1	1	1	1	1	1	1	1	1	0	1691300	952380	588850	409240	2266900	1681400	1271700	817340	896070	542150	390670	161560	1273700	721560	519180	0
Q6PGP7	>Q6PGP7|TTC37_HUMAN Tetratricopeptide repeat protein 37 |Homo sapiens	7	9	1	4	11	1	1	3	11	8	1	5	10	9	5	1	5311470	12195970	145020	2285320	29881070	249450	520250	6035600	20676910	10255390	847570	2489240	16378250	10388250	3250320	534490
O15144	>O15144|ARPC2_HUMAN Actin-related protein 2/3 complex subunit 2 |Homo sapiens	12	12	10	12	12	10	8	9	11	12	11	12	12	12	11	8	118841300	73420560	23292060	31046500	96203400	47803300	27270600	26578750	95426000	65233930	36294190	22551860	114857600	88509990	30215380	10946290
P46926	>P46926|GNPI1_HUMAN Glucosamine-6-phosphate isomerase 1 |Homo sapiens	3	2	2	2	2	2	2	2	3	2	2	1	3	2	2	0	16342000	5731200	1200750	1866280	8622200	4793500	3671930	2850210	15249600	3947900	1559430	987300	25518000	3788400	2902370	0
P61966	>P61966|AP1S1_HUMAN AP-1 complex subunit sigma-1A |Homo sapiens	1	0	1	0	0	0	0	0	1	0	0	0	1	0	0	0	199160	0	472210	0	0	0	0	0	544520	0	0	0	436030	0	0	0
P83731	>P83731|RL24_HUMAN 60S ribosomal protein L24 |Homo sapiens	2	1	3	3	1	3	1	2	1	3	3	3	1	2	1	1	1543810	1571000	3208880	5654050	353110	4799940	6253500	3210960	348810	2008820	8600000	5219480	1337300	2944990	5293400	327070
Q15393	>Q15393|SF3B3_HUMAN Splicing factor 3B subunit 3 |Homo sapiens	54	63	35	45	64	43	45	48	61	62	35	45	61	59	48	38	271071880	858420880	41453180	140377490	826427470	148056440	237430940	332108430	904457850	794369290	43407950	176421980	687419480	591620870	352302430	103766620
O60216;Q9H4I0	>O60216|RAD21_HUMAN Double-strand-break repair protein rad21 homolog |Homo sapiens;>Q9H4I0|RD21L_HUMAN Double-strand-break repair protein rad21-like protein 1 |Homo sapiens	2	2	0	1	3	1	0	1	2	2	2	1	2	2	1	0	2766300	2461700	0	305440	3640650	712540	0	704350	3260700	2524300	574360	389270	4319800	2574200	828010	0
P35659	>P35659|DEK_HUMAN Protein DEK |Homo sapiens	1	1	1	1	1	1	1	1	1	1	1	1	1	1	1	1	1474600	1420000	1044000	1108300	1527600	2094100	2130800	1900800	1299600	1570400	1481600	670180	756350	1295300	1010200	497040
Q9Y3C0	>Q9Y3C0|CCD53_HUMAN WASH complex subunit CCDC53 |Homo sapiens	3	3	3	1	3	2	2	1	3	3	3	1	3	3	1	1	9258700	7392900	3220810	635140	7134740	7365400	2422900	744530	6461600	6376500	3187200	670810	8483100	6774880	1905200	633070
P14618;P30613	>P14618|KPYM_HUMAN Pyruvate kinase isozymes M1/M2 |Homo sapiens;>P30613|KPYR_HUMAN Pyruvate kinase isozymes R/L |Homo sapiens	3	3	3	3	3	3	3	3	3	3	3	3	3	3	3	2	139099200	74459300	42159400	35416700	118689700	103552100	49838800	40859800	111111200	65876300	34598800	33799900	104612900	94003100	64685900	13966400
Q96AE4	>Q96AE4|FUBP1_HUMAN Far upstream element-binding protein 1 |Homo sapiens	11	10	10	10	11	12	11	9	9	9	10	10	9	11	9	4	43863280	25312900	15910990	13313740	27031040	42313920	23117990	15778700	18369800	19672470	22655550	12559040	30127060	30109120	16044230	3197640
Q9UFN0	>Q9UFN0|NPS3A_HUMAN Protein NipSnap homolog 3A |Homo sapiens	2	2	2	1	2	2	1	1	2	1	2	0	2	1	0	0	7659600	2535400	1643310	176430	3857460	4175800	1157700	1179700	3557380	1631000	1626370	0	5629400	2012900	0	0
CON__ENSEMBL:ENSBTAP00000016242;P68363;P68366;A6NHL2;Q71U36;Q13748;Q9BQE3	>ENSEMBL:ENSBTAP00000016242 (Bos taurus) similar to alpha-tubulin I isoform 1;>P68363|TBA1B_HUMAN Tubulin alpha-1B chain |Homo sapiens;>P68366|TBA4A_HUMAN Tubulin alpha-4A chain |Homo sapiens;>A6NHL2|TBAL3_HUMAN Tubulin alpha chain-like 3 |Homo sapiens;>Q7	11	11	11	11	11	12	11	10	11	11	11	11	11	12	11	12	489862670	607665300	424729900	621931100	220164800	507097300	857839600	852764500	286196380	434214020	738639300	834623700	257633550	443515830	613800700	419086510
P11940;Q9H361;Q13310	>P11940|PABP1_HUMAN Polyadenylate-binding protein 1 |Homo sapiens;>Q9H361|PABP3_HUMAN Polyadenylate-binding protein 3 |Homo sapiens;>Q13310|PABP4_HUMAN Polyadenylate-binding protein 4 |Homo sapiens	1	1	1	0	0	1	0	0	1	1	1	1	0	1	1	0	400870	456500	441020	0	0	661830	0	0	178480	297470	514410	734740	0	321730	601460	0
P35908;CON__P35908;CON__Q7Z794;Q7Z794;CON__Q6IFZ6	>P35908|K22E_HUMAN Keratin, type II cytoskeletal 2 epidermal |Homo sapiens;>P35908 SWISS-PROT:P35908 Tax_Id=9606 Gene_Symbol=KRT2 Keratin, type II cytoskeletal 2 epidermal;>Q7Z794 SWISS-PROT:Q7Z794 Tax_Id=9606 Gene_Symbol=KRT77 Keratin 77;>Q7Z794|K2C1B_HUM	1	0	1	0	0	0	1	1	0	0	1	0	0	0	0	0	252630	0	132790	0	0	0	1181500	396990	0	0	138330	0	0	0	0	0
CON__P02533;P02533;CON__P08779;P08779;CON__Q3ZAW8;CON__Q9Z2K1	>P02533 SWISS-PROT:P02533 Tax_Id=9606 Gene_Symbol=KRT14 Keratin, type I cytoskeletal 14;>P02533|K1C14_HUMAN Keratin, type I cytoskeletal 14 |Homo sapiens;>P08779 SWISS-PROT:P08779 Tax_Id=9606 Gene_Symbol=KRT16 Keratin, type I cytoskeletal 16;>P08779|K1C16_	0	0	0	0	0	1	0	0	0	0	0	0	0	0	0	1	0	0	0	0	0	611940	0	0	0	0	0	0	0	0	0	1644800
P61758	>P61758|PFD3_HUMAN Prefoldin subunit 3 |Homo sapiens	6	6	5	5	5	6	5	5	4	4	6	5	6	4	5	5	43465400	22931470	19833880	10780500	24174750	44494900	19738960	16673170	16966330	19772250	23756020	9239560	35730000	27392300	20332100	5099340
CON__Streptavidin	>Streptavidin (S.avidinii)	1	0	1	0	0	0	0	0	2	1	1	1	0	0	0	0	654600	0	456260	0	0	0	0	0	12985820	3666600	902360	773890	0	0	0	0
P49721	>P49721|PSB2_HUMAN Proteasome subunit beta type-2 |Homo sapiens	0	0	0	4	0	1	1	3	1	0	0	6	1	1	0	4	0	0	0	19045100	0	493740	660550	16155600	435140	0	0	62279700	2399200	240480	0	17305110
Q99714	>Q99714|HCD2_HUMAN 3-hydroxyacyl-CoA dehydrogenase type-2 |Homo sapiens	15	13	12	9	15	15	13	10	12	12	11	11	14	12	12	10	47406750	22338290	12018140	9657680	37468120	50860370	24925220	9910990	22462150	18009700	13315860	8680790	46941650	32709500	25668690	11410070
P35579;Q7Z406	>P35579|MYH9_HUMAN Myosin-9 |Homo sapiens;>Q7Z406|MYH14_HUMAN Myosin-14 |Homo sapiens	1	2	1	2	2	2	2	2	2	2	1	2	2	1	2	2	1046200	3845300	204090	5455100	8059500	1267170	5777400	9963200	3768920	3360400	490150	9136100	2956968	2655500	6281600	6636200
P58876;P62807;Q5QNW6;Q93079;Q99877;Q99879;Q99880;Q8N257;Q96A08;P23527;P33778;Q16778	>P58876|H2B1D_HUMAN Histone H2B type 1-D |Homo sapiens;>P62807|H2B1C_HUMAN Histone H2B type 1-C/E/F/G/I |Homo sapiens;>Q5QNW6|H2B2F_HUMAN Histone H2B type 2-F |Homo sapiens;>Q93079|H2B1H_HUMAN Histone H2B type 1-H |Homo sapiens;>Q99877|H2B1N_HUMAN Histone	2	2	2	2	2	2	2	2	1	2	2	2	2	2	1	2	4955790	2108870	6408400	2313170	1476420	6357300	7109900	2879100	1137300	2959400	5649600	2420200	3574440	6384800	1440800	1687270
P49792;A6NKT7	>P49792|RBP2_HUMAN E3 SUMO-protein ligase RanBP2 |Homo sapiens;>A6NKT7|RGPD3_HUMAN RanBP2-like and GRIP domain-containing protein 3 |Homo sapiens	1	1	1	2	1	0	1	1	0	2	1	1	1	1	1	0	1948500	2304700	286090	2460730	1002900	0	311940	2279800	0	2616890	418930	1829100	473350	1975400	2698000	0
P13861	>P13861|KAP2_HUMAN cAMP-dependent protein kinase type II-alpha regulatory subunit |Homo sapiens	16	18	30	29	15	18	28	30	15	22	31	29	20	16	27	30	32000640	62869040	246132150	203271050	18789780	58197570	220497980	285083860	18449950	41964590	295810390	203951010	23007090	43070220	162433560	197232210
Q02241	>Q02241|KIF23_HUMAN Kinesin-like protein KIF23 |Homo sapiens	2	1	1	2	1	2	1	1	2	0	2	1	2	2	2	0	3361210	312500	480430	470990	1945000	1569450	990580	1035900	2087070	0	1236330	486770	1682480	1318760	772510	0
P31948	>P31948|STIP1_HUMAN Stress-induced-phosphoprotein 1 |Homo sapiens	26	24	26	24	24	26	23	22	23	25	23	20	26	22	23	17	183339990	98641110	96976130	59651940	190665780	175821930	97985780	80150890	101700830	117264020	111805760	65119230	163620163	119611190	87362560	32912550
P26196	>P26196|DDX6_HUMAN Probable ATP-dependent RNA helicase DDX6 |Homo sapiens	3	3	1	1	3	1	0	3	3	3	1	2	3	3	2	1	5086180	3711960	616610	764410	8708140	1728100	0	3143740	6112910	2532830	334200	1035550	7421290	4789670	2149300	1014200
P47914	>P47914|RL29_HUMAN 60S ribosomal protein L29 |Homo sapiens	1	1	0	0	1	1	1	1	1	0	1	0	1	1	0	1	1240300	354280	0	0	1383400	1747400	768220	756150	440370	0	222460	0	870320	755680	0	507410
A8MWD9;P62308	>A8MWD9|RUXGL_HUMAN Small nuclear ribonucleoprotein G-like protein |Homo sapiens;>P62308|RUXG_HUMAN Small nuclear ribonucleoprotein G |Homo sapiens	8	8	9	8	8	9	8	8	7	8	8	5	7	6	8	8	419685440	290948900	178358410	103359820	257825210	420045540	238059100	97480050	200388310	181802410	196560830	49555400	239667090	171007960	205021450	84006400
P61081	>P61081|UBC12_HUMAN NEDD8-conjugating enzyme Ubc12 |Homo sapiens	1	1	2	2	1	2	2	2	1	1	1	1	1	1	1	1	3317400	2283600	2999480	5228900	1457300	10019300	6796300	4846200	1376900	1796400	2557700	1473900	2159300	2742100	2913700	1594300
Q12830	>Q12830|BPTF_HUMAN Nucleosome-remodeling factor subunit BPTF |Homo sapiens	6	6	0	3	8	3	3	4	7	6	3	3	7	3	2	1	6246680	4851030	0	920370	10995870	815655	931718	1776250	11123460	5630992	897610	2124700	6051130	2112290	5163020	64042
Q15910	>Q15910|EZH2_HUMAN Histone-lysine N-methyltransferase EZH2 |Homo sapiens	1	1	1	0	1	1	0	0	1	1	0	0	1	1	0	0	1514600	1293500	483620	0	2524900	949050	0	0	895550	499720	0	0	1434200	817660	0	0
O95825	>O95825|QORL1_HUMAN Quinone oxidoreductase-like protein 1 |Homo sapiens	4	4	3	1	3	3	1	0	4	3	2	0	3	3	0	1	8036300	5654900	1071170	359000	3254460	2227130	654830	0	5620500	3872040	1429850	0	4679100	3615080	0	897040
Q86TI2	>Q86TI2|DPP9_HUMAN Dipeptidyl peptidase 9 |Homo sapiens	4	4	0	1	4	1	0	1	5	5	0	0	4	3	0	1	2565730	1721640	0	266860	5975800	403970	0	430960	3655780	1817680	0	0	2956660	1574500	0	448060
Q9NX55	>Q9NX55|HYPK_HUMAN Huntingtin-interacting protein K |Homo sapiens	4	4	4	3	4	2	4	3	4	3	3	2	3	2	3	2	45555710	22841980	18941150	11189600	38160100	23244600	14458800	6251480	20399120	18451800	10376400	5139100	24623930	18258300	14801200	3577500
CON__ENSEMBL:ENSBTAP00000016242;P68363;Q71U36;Q9BQE3	>ENSEMBL:ENSBTAP00000016242 (Bos taurus) similar to alpha-tubulin I isoform 1;>P68363|TBA1B_HUMAN Tubulin alpha-1B chain |Homo sapiens;>Q71U36|TBA1A_HUMAN Tubulin alpha-1A chain |Homo sapiens;>Q9BQE3|TBA1C_HUMAN Tubulin alpha-1C chain |Homo sapiens	18	19	20	19	19	18	18	19	17	19	20	20	18	19	18	19	1280885680	1678044300	2154072500	2697496900	908584950	2490220090	2555965500	3227030060	807871300	1584829200	3058379800	2609381600	1039400520	1540941900	1710247600	2267827000
Q13501	>Q13501|SQSTM_HUMAN Sequestosome-1 |Homo sapiens	6	6	6	6	5	5	5	6	3	6	6	6	4	5	4	5	12900610	9427490	9204500	8058490	7685090	12192000	10971120	10404530	4722770	12336230	16977530	9754470	8901500	9062980	5408940	7337790
P18669	>P18669|PGAM1_HUMAN Phosphoglycerate mutase 1 |Homo sapiens	3	3	3	3	3	3	3	3	2	3	3	3	3	3	3	3	34929400	14143100	11798400	8066550	23695000	19043700	12069300	10280560	14909600	10702500	11831710	7293400	17763200	20003700	17134200	5255400
P47756	>P47756|CAPZB_HUMAN F-actin-capping protein subunit beta |Homo sapiens	14	14	16	15	14	16	17	16	12	14	16	16	14	15	15	17	86611500	67253340	105130490	112347370	53715160	67028670	127734350	105561610	52799800	51364890	169353430	130776370	66361780	69428370	103877410	84114200
O00231	>O00231|PSD11_HUMAN 26S proteasome non-ATPase regulatory subunit 11 |Homo sapiens	30	30	29	34	31	30	30	33	27	27	30	34	31	28	31	31	125573070	164618160	102272530	364254830	189325650	110347020	241382940	467316940	162671310	154169820	156754380	470763400	161968035	159446560	255694670	327377200
O00267	>O00267|SPT5H_HUMAN Transcription elongation factor SPT5 |Homo sapiens	2	3	2	1	4	2	2	1	4	1	1	1	3	2	1	0	1363330	1518800	793940	217570	4131860	851890	1392690	454100	2234950	451810	203790	191120	2079620	1151990	359700	0
Q96JJ3	>Q96JJ3|ELMO2_HUMAN Engulfment and cell motility protein 2 |Homo sapiens	1	5	1	1	5	1	3	3	5	6	1	2	3	4	4	1	3983000	12993680	1619200	1324700	10820540	7362900	6169200	3354900	6356090	15580740	2332900	2533740	3567080	7939130	12181900	2196800
P09496	>P09496|CLCA_HUMAN Clathrin light chain A |Homo sapiens	18	17	17	16	17	17	14	15	16	15	14	13	17	12	16	12	618845300	229773710	151380010	67252430	216581600	280582550	87424340	89863640	247438900	208853760	103615150	36239530	393381174	215658700	95582710	23966100
CON__P02533;P02533;CON__P08779;P08779;CON__Q04695;Q04695;CON__Q3ZAW8;CON__Q9Z2K1	>P02533 SWISS-PROT:P02533 Tax_Id=9606 Gene_Symbol=KRT14 Keratin, type I cytoskeletal 14;>P02533|K1C14_HUMAN Keratin, type I cytoskeletal 14 |Homo sapiens;>P08779 SWISS-PROT:P08779 Tax_Id=9606 Gene_Symbol=KRT16 Keratin, type I cytoskeletal 16;>P08779|K1C16_	0	0	0	0	0	0	0	0	0	0	0	0	0	0	0	1	0	0	0	0	0	0	0	0	0	0	0	0	0	0	0	2039500
Q06210	>Q06210|GFPT1_HUMAN Glucosamine--fructose-6-phosphate aminotransferase [isomerizing] 1 |Homo sapiens	17	17	7	10	18	10	8	8	20	16	2	11	17	14	8	8	42223660	65971450	3816790	6640940	109003700	13229640	11677580	8852950	92330620	48657020	521360	8819490	77397500	39391420	15134940	8762150
Q15233	>Q15233|NONO_HUMAN Non-POU domain-containing octamer-binding protein |Homo sapiens	37	34	32	33	35	33	31	32	30	32	33	30	32	28	29	33	238482920	141679780	132783440	89689520	161221420	263564990	154621110	119215890	120739540	118011720	135584990	84089120	188819640	163063350	103766010	55888270
Q13901	>Q13901|C1D_HUMAN Nuclear nucleic acid-binding protein C1D |Homo sapiens	4	3	3	1	4	3	2	2	3	3	2	1	3	2	2	2	17191410	9344060	4142670	1917400	14172600	22209700	5283090	3344500	6764610	11302500	4263500	1536900	7341690	2637690	5161610	2101770
REV__CON__P13647;REV__P13647;REV__CON__P02538;REV__CON__P04259;REV__CON__P48668;REV__P02538;REV__P04259;REV__P48668	>P13647 SWISS-PROT:P13647 Tax_Id=9606 Gene_Symbol=KRT5 Keratin, type II cytoskeletal 5;>P13647|K2C5_HUMAN Keratin, type II cytoskeletal 5 |Homo sapiens;>P02538 SWISS-PROT:P02538 Tax_Id=9606 Gene_Symbol=KRT6A Keratin, type II cytoskeletal 6A;>P04259 SWISS-P	0	0	0	1	0	0	0	0	0	0	0	0	0	0	0	0	0	0	0	417420	0	0	0	0	0	0	0	0	0	0	0	0
Q9Y5X3	>Q9Y5X3|SNX5_HUMAN Sorting nexin-5 |Homo sapiens	2	1	2	1	2	2	0	0	1	1	1	0	2	1	1	1	1464030	589840	728100	293780	1891440	2254250	0	0	425410	407650	340360	0	1405480	778150	909450	574830
P63172	>P63172|DYLT1_HUMAN Dynein light chain Tctex-type 1 |Homo sapiens	4	4	4	3	3	4	4	2	1	2	3	2	2	4	1	3	12361030	26151420	24743840	12743960	9801700	15257260	29418400	4551280	1196300	4458120	17860300	2811450	5347800	17053650	6059300	9696820
Q52LJ0	>Q52LJ0|FA98B_HUMAN Protein FAM98B |Homo sapiens	7	6	5	4	7	5	4	5	6	6	4	4	7	6	2	2	51938800	23217320	11990760	4307350	28977220	23015740	6677350	11868600	23796710	14353140	4262740	3253420	33817420	20463790	3135700	1848380
O00193	>O00193|SMAP_HUMAN Small acidic protein |Homo sapiens	1	1	1	1	0	1	1	0	1	1	1	1	1	0	0	0	1925800	259970	1292500	245970	0	1002900	557420	0	716650	1197600	513100	650830	160510	0	0	0
Q14978	>Q14978|NOLC1_HUMAN Nucleolar and coiled-body phosphoprotein 1 |Homo sapiens	32	30	33	29	31	32	32	31	30	30	31	27	24	13	22	25	158608380	130992560	93868520	53174790	123726180	244199600	127770140	81141640	96635120	106045870	98139440	39801210	70188810	47387470	56007054	37309511
P49736	>P49736|MCM2_HUMAN DNA replication licensing factor MCM2 |Homo sapiens	75	75	71	68	81	74	71	72	77	80	75	72	79	68	74	65	704499660	1344194380	292083510	268705620	924551040	693262720	654826350	388925470	935285130	1395759300	545982470	378457610	892097182	1164108986	907854705	206828350
O15212	>O15212|PFD6_HUMAN Prefoldin subunit 6 |Homo sapiens	8	7	8	8	8	7	6	6	6	7	7	6	7	9	9	7	54724260	37223270	23705750	13738810	37051410	47307700	20228800	14131200	23020700	36916290	19911360	10629610	22586900	39378460	26488820	13173770
P36954	>P36954|RPB9_HUMAN DNA-directed RNA polymerase II subunit RPB9 |Homo sapiens	0	15	17	16	0	13	17	14	0	11	17	15	0	12	13	10	0	33498840	127604630	36629470	0	28257690	98047640	45838140	0	19343270	80775310	26693780	0	19999610	37172880	12837320
P53999	>P53999|TCP4_HUMAN Activated RNA polymerase II transcriptional coactivator p15 |Homo sapiens	1	1	1	1	1	1	1	1	1	1	1	1	1	1	1	1	7109900	4728200	4667200	4895300	6373000	11328000	9527300	6813400	4464200	6250600	7984600	3761600	4274600	5220500	8047600	5174000
Q93045	>Q93045|STMN2_HUMAN Stathmin-2 |Homo sapiens	1	1	1	1	1	1	1	0	1	1	1	1	1	1	1	1	3315200	1816500	2537300	1830000	2265500	3143500	349870	0	2039900	2068100	1090200	729720	1406900	1968600	1697100	825870
Q9Y2G7	>Q9Y2G7|ZFP30_HUMAN Zinc finger protein 30 homolog |Homo sapiens	0	0	0	0	1	1	1	1	0	1	0	0	0	0	0	0	0	0	0	0	10645000	12412000	5133100	1270900	0	7394300	0	0	0	0	0	0
Q92784	>Q92784|DPF3_HUMAN Zinc finger protein DPF3 |Homo sapiens	0	0	0	0	0	0	0	0	0	0	1	0	0	0	0	0	0	0	0	0	0	0	0	0	0	0	941920	0	0	0	0	0
P68371;P04350	>P68371|TBB4B_HUMAN Tubulin beta-4B chain |Homo sapiens;>P04350|TBB4A_HUMAN Tubulin beta-4A chain |Homo sapiens	9	10	10	10	11	10	11	10	9	9	10	10	9	9	10	12	162640300	304806210	331177400	492294300	250032160	285836100	655828900	718076400	238087300	241930800	797894800	414895720	231869200	290018100	218884160	324305910
O60231	>O60231|DHX16_HUMAN Putative pre-mRNA-splicing factor ATP-dependent RNA helicase DHX16 |Homo sapiens	1	2	1	1	2	0	1	1	2	2	1	2	2	2	2	1	1633100	8183900	219230	1025600	4539700	0	2310200	1563300	6095710	9327000	240370	2928100	5716650	7174400	7456400	1244700
P39687	>P39687|AN32A_HUMAN Acidic leucine-rich nuclear phosphoprotein 32 family member A |Homo sapiens	2	3	3	3	2	3	3	3	3	3	3	2	2	1	3	3	4881380	6131590	6224010	6464630	6876600	13539500	13156200	9361200	2343320	4563880	5125260	3576560	3632410	3277800	6993280	6981590
P49902	>P49902|5NTC_HUMAN Cytosolic purine 5-nucleotidase |Homo sapiens	2	2	0	0	2	0	0	0	2	1	0	0	2	2	0	0	1641190	1309500	0	0	3284900	0	0	0	1836830	172130	0	0	2198280	1516020	0	0
Q9BVC4	>Q9BVC4|LST8_HUMAN Target of rapamycin complex subunit LST8 |Homo sapiens	9	10	7	7	10	8	9	7	6	8	9	9	8	9	5	8	12346510	54698400	6109647	4506736	10851560	17221430	18947010	5590270	5622250	16718220	15393883	8956427	9058990	15569870	11075086	6771210
Q99496	>Q99496|RING2_HUMAN E3 ubiquitin-protein ligase RING2 |Homo sapiens	3	3	3	2	3	4	4	3	2	3	4	2	1	3	3	3	4258320	4231680	2953030	2160690	5781460	11115860	4219630	4235436	3074700	4313430	4160710	2001300	1350100	3092750	3357000	3564530
Q9NVK5	>Q9NVK5|FGOP2_HUMAN FGFR1 oncogene partner 2 |Homo sapiens	1	1	1	0	0	0	0	0	0	0	1	0	0	0	0	0	1481500	466490	527180	0	0	0	0	0	0	0	427240	0	0	0	0	0
P63167	>P63167|DYL1_HUMAN Dynein light chain 1, cytoplasmic |Homo sapiens	6	6	4	5	6	6	6	5	7	6	4	5	6	6	6	3	17539320	27758500	3690500	5986440	26255800	12148400	18285600	17040200	27330710	23130200	5911880	9929070	22865800	24609700	16656410	4128800
P40227	>P40227|TCPZ_HUMAN T-complex protein 1 subunit zeta |Homo sapiens	12	13	17	18	12	12	16	18	12	15	18	18	13	14	14	17	23532790	30417890	38671450	101488520	17862870	40109940	57656550	137237590	19185320	32329240	78710480	165360210	25808810	31477260	52549050	72335500
Q562R1	>Q562R1|ACTBL_HUMAN Beta-actin-like protein 2 |Homo sapiens	1	0	1	0	1	0	0	1	1	0	0	0	1	0	0	0	300260000	0	276110000	0	472870000	0	0	473880000	335540000	0	0	0	289460000	0	0	0
Q96B26	>Q96B26|EXOS8_HUMAN Exosome complex component RRP43 |Homo sapiens	9	9	9	6	10	8	9	7	9	9	8	6	8	9	7	6	83991000	67727200	26148160	9787240	56749860	78730100	30693130	14881910	59751840	63543200	31315590	9642400	68015300	73845200	23985700	8307880
P49368	>P49368|TCPG_HUMAN T-complex protein 1 subunit gamma |Homo sapiens	19	23	27	29	22	24	26	27	16	22	29	31	20	18	25	28	41233910	74484720	102041130	273901920	48487760	85835980	162869110	308932810	25938430	66019990	166037420	306568800	38977823	58957150	121468790	193348950
O60684	>O60684|IMA7_HUMAN Importin subunit alpha-7 |Homo sapiens	5	5	4	3	5	5	5	5	5	5	5	5	5	5	5	4	18249460	26716300	10008720	5785100	18865200	14032950	20859200	15237800	17009990	29780200	20038540	13037380	21085120	31015200	20736300	4928990
CON__ENSEMBL:ENSBTAP00000016242;P68363;P68366;Q9H853;Q9BQE3	>ENSEMBL:ENSBTAP00000016242 (Bos taurus) similar to alpha-tubulin I isoform 1;>P68363|TBA1B_HUMAN Tubulin alpha-1B chain |Homo sapiens;>P68366|TBA4A_HUMAN Tubulin alpha-4A chain |Homo sapiens;>Q9H853|TBA4B_HUMAN Putative tubulin-like protein alpha-4B |Homo	2	2	2	2	2	2	2	2	2	2	2	2	2	2	2	2	197021000	380505000	295829000	403120000	127840570	572845000	421170000	1001726000	181483000	254176000	650060000	1336990000	167402000	238581000	270768000	249876000
Q06830;Q13162	>Q06830|PRDX1_HUMAN Peroxiredoxin-1 |Homo sapiens;>Q13162|PRDX4_HUMAN Peroxiredoxin-4 |Homo sapiens	5	5	5	5	5	5	4	4	5	5	5	4	5	5	5	5	674379600	346679100	209680800	171653330	420125300	544300000	243507900	119761700	353793420	260405600	220337600	134104500	500559900	348224120	281985100	128266670
O75534	>O75534|CSDE1_HUMAN Cold shock domain-containing protein E1 |Homo sapiens	3	1	1	2	3	2	2	4	1	1	2	2	2	2	0	3	3196460	714080	309210	1012810	5959100	2882410	1434920	3813560	752680	810770	894400	1177380	3117640	949680	0	1111370
Q9UBQ7	>Q9UBQ7|GRHPR_HUMAN Glyoxylate reductase/hydroxypyruvate reductase |Homo sapiens	2	1	1	1	2	1	1	0	2	2	2	1	2	2	1	1	5109000	1728900	633860	1051400	5783500	2361000	1394800	0	3230740	1961030	1379560	745400	5749600	5255300	1642500	516310
P49005	>P49005|DPOD2_HUMAN DNA polymerase delta subunit 2 |Homo sapiens	1	1	1	1	1	1	1	0	0	0	1	1	1	2	1	0	2124900	1293500	1074900	931700	4164000	2867900	1131900	0	0	0	518480	626670	1324300	2141990	1164000	0
P19623	>P19623|SPEE_HUMAN Spermidine synthase |Homo sapiens	4	3	3	4	4	4	4	4	3	4	4	4	4	4	3	3	10230000	5652420	3917670	4892740	6671960	13745700	7761100	5679170	3904700	4815030	3994650	3905410	6436920	8275130	7865900	3872440
REV__Q9ULJ1	>Q9ULJ1|ODF2L_HUMAN Outer dense fiber protein 2-like |Homo sapiens	1	1	1	1	1	1	1	1	1	1	1	1	1	1	1	1	3538200	4457200	1811000	1382200	6364200	5248600	3551000	3432000	1127300	4192400	2705500	2066100	2236100	1523100	3171400	978840
Q13557	>Q13557|KCC2D_HUMAN Calcium/calmodulin-dependent protein kinase type II subunit delta |Homo sapiens	2	9	11	11	1	8	10	11	0	8	11	11	1	7	11	11	872600	15584820	48519480	46074750	561550	13204590	85668700	67911130	0	11262040	102377200	68959300	6739.9	8916760	71070700	36189620
Q9NS87	>Q9NS87|KIF15_HUMAN Kinesin-like protein KIF15 |Homo sapiens	1	0	0	0	0	0	1	0	0	0	0	1	1	0	0	0	128020	0	0	0	0	0	1238600	0	0	0	0	2251200	43384	0	0	0
Q8N8S7	>Q8N8S7|ENAH_HUMAN Protein enabled homolog |Homo sapiens	4	4	4	3	4	4	4	2	4	3	2	2	4	4	2	3	11851900	7479550	6807800	4217750	12009130	22645460	9063970	7247100	7960710	4761550	4188860	2175900	7172070	7813460	6561700	4945830
Q15906	>Q15906|VPS72_HUMAN Vacuolar protein sorting-associated protein 72 homolog |Homo sapiens	0	2	9	9	0	4	10	9	0	3	9	9	1	3	7	10	0	2344030	52732440	31903770	0	3338750	56651540	41876520	0	1296050	67569490	27780250	185640	4157040	18644332	24711210
P33316	>P33316|DUT_HUMAN Deoxyuridine 5-triphosphate nucleotidohydrolase, mitochondrial |Homo sapiens	10	9	10	8	10	10	8	7	9	7	8	9	10	9	5	7	33024100	17646750	16385430	14304520	24244500	43032600	30040600	19890660	14996690	15790730	17290310	12467840	21323350	22026360	14534000	8155630
Q7L5Y9	>Q7L5Y9|MAEA_HUMAN Macrophage erythroblast attacher |Homo sapiens	0	0	1	2	0	0	1	2	0	0	1	2	0	0	0	2	0	0	290770	8291200	0	0	795100	8802100	0	0	860570	5365900	0	0	0	5977100
P26038	>P26038|MOES_HUMAN Moesin |Homo sapiens	4	1	1	1	1	1	1	1	3	1	0	0	3	2	0	1	3528920	717240	535010	440000	992530	164680	879110	843990	1574250	440830	0	0	1926862	1323410	0	800730
P33176;Q12840;O60282	>P33176|KINH_HUMAN Kinesin-1 heavy chain |Homo sapiens;>Q12840|KIF5A_HUMAN Kinesin heavy chain isoform 5A |Homo sapiens;>O60282|KIF5C_HUMAN Kinesin heavy chain isoform 5C |Homo sapiens	3	4	4	5	5	4	3	2	4	4	4	2	4	4	5	3	28999100	19049390	5243470	7785170	28939200	21268000	8240410	6173400	24506200	18485270	10856600	4833800	31427700	18231100	13608520	3590740
Q01844	>Q01844|EWS_HUMAN RNA-binding protein EWS |Homo sapiens	2	0	1	1	1	2	1	1	1	0	0	1	1	1	1	1	1600880	0	506580	869260	2040800	3399510	1698300	461530	310180	0	0	384980	517440	492580	1212600	546640
Q96QK1	>Q96QK1|VPS35_HUMAN Vacuolar protein sorting-associated protein 35 |Homo sapiens	4	4	0	4	5	2	3	4	4	5	1	4	5	4	3	2	3281710	5308430	0	2475620	18427100	727810	2315390	3286500	5579840	7011670	31405	1982330	12599570	7179250	3262010	1180110
Q9P0U4	>Q9P0U4|CXXC1_HUMAN CpG-binding protein |Homo sapiens	13	14	14	10	11	10	6	5	10	13	14	13	12	11	8	8	24622870	31646610	22584500	11462740	13206030	32467460	15123210	9223700	10799180	26495710	31957910	14344130	14398230	26249390	17908250	12868640
P35527;CON__P35527	>P35527|K1C9_HUMAN Keratin, type I cytoskeletal 9 |Homo sapiens;>P35527 SWISS-PROT:P35527 Tax_Id=9606 Gene_Symbol=KRT9 Keratin, type I cytoskeletal 9	10	10	9	10	7	11	10	11	7	8	10	9	4	3	8	11	26662670	38528160	15340290	79291430	12610390	63616530	61424520	62955160	22021770	26314870	31152880	20119490	3647810	4454190	26277400	68665100
Q13409	>Q13409|DC1I2_HUMAN Cytoplasmic dynein 1 intermediate chain 2 |Homo sapiens	25	25	24	20	18	23	23	21	18	26	28	24	17	26	23	19	144638510	265978220	186429050	84159460	91755720	214379610	212937930	114421150	72180680	234157090	357423860	103685160	92511250	221355780	159331630	54236500
P62875	>P62875|RPAB5_HUMAN DNA-directed RNA polymerases I, II, and III subunit RPABC5 |Homo sapiens	3	6	7	6	3	7	7	7	2	7	7	6	3	7	7	6	9299570	40574200	56442100	36839300	5292520	69945300	107829500	43410200	5324960	49171360	113848500	35572400	7051530	55309040	79901100	46519800
Q15287	>Q15287|RNPS1_HUMAN RNA-binding protein with serine-rich domain 1 |Homo sapiens	2	2	2	2	1	3	1	1	1	2	2	2	1	0	0	0	3802720	3854800	5529000	4192870	681820	10962800	1891200	704220	946810	3918160	947610	2352830	182350	0	0	0
P07900;P08238;Q58FF7;Q58FF6	>P07900|HS90A_HUMAN Heat shock protein HSP 90-alpha |Homo sapiens;>P08238|HS90B_HUMAN Heat shock protein HSP 90-beta |Homo sapiens;>Q58FF7|H90B3_HUMAN Putative heat shock protein HSP 90-beta-3 |Homo sapiens;>Q58FF6|H90B4_HUMAN Putative heat shock protein H	4	3	3	3	4	2	3	3	4	2	3	2	3	3	4	2	43644900	37422500	19980930	30459400	55716500	42327600	53912200	53124300	35563190	42741000	20192590	19419100	54323590	49105760	54998540	29378700
Q9H0L4	>Q9H0L4|CSTFT_HUMAN Cleavage stimulation factor subunit 2 tau variant |Homo sapiens	2	0	1	0	1	1	1	0	2	1	1	0	1	1	1	0	7217100	0	1724300	0	1680900	1674900	1651100	0	3633400	2619900	1776900	0	2585900	1341700	1097000	0
Q06265;REV__Q6EMK4	>Q06265|EXOS9_HUMAN Exosome complex component RRP45 |Homo sapiens;>Q6EMK4|VASN_HUMAN Vasorin |Homo sapiens	1	1	0	0	1	1	1	1	1	1	0	0	1	0	0	1	1756600	53820	0	0	975560	705210	312910	398520	197490	978560	0	0	1020500	0	0	83117
P48634	>P48634|PRC2A_HUMAN Protein PRRC2A |Homo sapiens	1	1	1	0	1	1	1	1	1	1	1	0	1	1	0	0	1036900	635200	602430	0	629440	1509000	1182500	471110	365040	397580	659160	0	639020	505970	0	0
P05091;P00352	>P05091|ALDH2_HUMAN Aldehyde dehydrogenase, mitochondrial |Homo sapiens;>P00352|AL1A1_HUMAN Retinal dehydrogenase 1 |Homo sapiens	1	1	0	1	0	0	0	0	1	1	1	0	1	1	1	0	1689500	614360	0	433170	0	0	0	0	913920	558350	299400	0	501810	1067400	954230	0
Q15042	>Q15042|RB3GP_HUMAN Rab3 GTPase-activating protein catalytic subunit |Homo sapiens	3	5	1	2	5	3	3	3	4	4	1	1	4	3	2	2	3368910	7254960	232670	1273880	7596930	1938540	2662070	2469440	7488550	5277190	347830	569860	9205850	4033270	1854980	1519750
Q13283	>Q13283|G3BP1_HUMAN Ras GTPase-activating protein-binding protein 1 |Homo sapiens	13	12	12	11	13	13	11	11	10	10	11	10	13	12	11	9	87122980	49623890	44765570	28871250	58039460	75563200	45110830	26969770	35401840	32723190	36293200	18478840	59782420	53123980	36255250	16407490
Q969G3	>Q969G3|SMCE1_HUMAN SWI/SNF-related matrix-associated actin-dependent regulator of chromatin subfamily E member 1 |Homo sapiens	15	16	27	25	9	13	27	27	10	11	27	27	8	12	26	27	18529060	25289680	202625030	236392060	9496530	27933050	221614722	290509300	5842480	13296330	329225630	221275130	7164997	21061320	181436320	179085660
P50502;Q8NFI4;Q8IZP2	>P50502|F10A1_HUMAN Hsc70-interacting protein |Homo sapiens;>Q8NFI4|F10A5_HUMAN Putative protein FAM10A5 |Homo sapiens;>Q8IZP2|ST134_HUMAN Putative protein FAM10A4 |Homo sapiens	3	2	2	2	2	2	2	2	2	2	2	2	3	2	2	2	10890400	5047300	4857200	3938900	6578100	10238100	6008900	4694900	4033800	4760000	5068400	3446900	8036910	7827400	6455100	2668850
Q9H9Q2	>Q9H9Q2|CSN7B_HUMAN COP9 signalosome complex subunit 7b |Homo sapiens	11	10	8	6	11	11	6	5	10	10	6	6	8	9	6	6	126964000	68518490	18313090	8377726	71402080	49766580	17238990	14458050	82692160	60256640	16190960	17825250	86429330	49219880	19579527	8798200
P51617	>P51617|IRAK1_HUMAN Interleukin-1 receptor-associated kinase 1 |Homo sapiens	0	0	0	0	0	0	0	0	0	0	0	0	0	0	0	0	0	0	0	0	0	0	0	0	0	0	0	0	0	0	0	0
Q8N1G4	>Q8N1G4|LRC47_HUMAN Leucine-rich repeat-containing protein 47 |Homo sapiens	2	2	2	2	1	2	2	2	1	1	2	2	1	2	1	1	1779270	1114450	1602460	1429210	1143600	2524500	2872200	2715500	453750	706230	1140580	567580	796640	1222920	808730	474170
Q13867	>Q13867|BLMH_HUMAN Bleomycin hydrolase |Homo sapiens	21	26	25	25	19	27	26	25	18	27	28	19	19	26	27	17	69374210	409582500	115158570	64280200	67794680	352044100	225243800	103207330	84446810	287199000	189713810	59526080	74456400	292387540	188506224	56947800
O15145	>O15145|ARPC3_HUMAN Actin-related protein 2/3 complex subunit 3 |Homo sapiens	7	7	7	6	8	8	7	5	7	6	6	7	5	7	7	7	93587590	37221400	25133560	25029800	75359950	68349300	31169890	23549960	71797980	42011800	22708100	19706440	66444100	61631600	37652340	16980700
Q6ZMI0	>Q6ZMI0|PPR21_HUMAN Protein phosphatase 1 regulatory subunit 21 |Homo sapiens	3	1	1	1	1	1	2	2	1	1	2	0	2	2	1	1	2849340	1117900	193040	29094000	1673300	102430000	27399770	26483300	1323000	1671800	94508500	0	49622600	961397	34792000	8733800
P19447	>P19447|ERCC3_HUMAN TFIIH basal transcription factor complex helicase XPB subunit |Homo sapiens	0	0	0	0	0	0	0	0	1	0	0	0	0	0	0	0	0	0	0	0	0	0	0	0	732200	0	0	0	0	0	0	0
Q86W42	>Q86W42|THOC6_HUMAN THO complex subunit 6 homolog |Homo sapiens	15	16	16	15	15	15	15	14	12	15	15	14	13	16	16	13	47285270	78276550	52318110	37445200	40180090	86256610	71411780	39614310	27319320	56268760	68624950	39904470	49444050	72468860	75968800	34910120
Q96C36;P32322	>Q96C36|P5CR2_HUMAN Pyrroline-5-carboxylate reductase 2 |Homo sapiens;>P32322|P5CR1_HUMAN Pyrroline-5-carboxylate reductase 1, mitochondrial |Homo sapiens	1	1	1	1	1	1	1	0	1	1	1	1	1	1	1	1	31392000	23586000	4642800	2630000	19772000	18841000	4982600	0	27433000	31332000	7538900	2523300	27233000	23228000	5048600	2693400
P30837	>P30837|AL1B1_HUMAN Aldehyde dehydrogenase X, mitochondrial |Homo sapiens	20	17	20	12	19	22	19	16	17	19	15	15	18	17	15	10	174256720	74110940	37726900	17929700	135715310	125905300	49084830	28425500	100164400	69719110	34101140	17100910	136784900	83099460	31461680	13451670
O43252	>O43252|PAPS1_HUMAN Bifunctional 3-phosphoadenosine 5-phosphosulfate synthase 1 |Homo sapiens	4	4	3	2	4	2	3	2	3	4	3	2	4	4	2	2	8329000	4856670	3827270	1204200	5538700	4126200	3322780	1727860	3272280	3316160	1751940	783890	2820736	3937060	2407600	1037650
P06753;P67936;CON__Q3SX28;P07951;P09493	>P06753|TPM3_HUMAN Tropomyosin alpha-3 chain |Homo sapiens;>P67936|TPM4_HUMAN Tropomyosin alpha-4 chain |Homo sapiens;>Q3SX28 TREMBL:Q3SX28;Q5KR48 (Bos taurus) Tropomyosin 2;>P07951|TPM2_HUMAN Tropomyosin beta chain |Homo sapiens;>P09493|TPM1_HUMAN Tropomy	3	3	3	3	3	3	3	3	3	3	3	3	3	3	2	3	14292300	10944410	12098500	9436800	12433600	19025600	16123400	14748400	5666580	9368720	8632400	6650550	12810000	11058200	9083900	7007800
O14818;Q8TAA3	>O14818|PSA7_HUMAN Proteasome subunit alpha type-7 |Homo sapiens;>Q8TAA3|PSA7L_HUMAN Proteasome subunit alpha type-7-like |Homo sapiens	7	7	6	7	7	7	6	7	5	6	7	7	7	7	5	7	40710950	36978920	22417700	222983100	36089750	48602800	20140710	182675200	21513100	30154600	29782950	307926800	27863580	37724360	22108000	206502500
Q07666	>Q07666|KHDR1_HUMAN KH domain-containing, RNA-binding, signal transduction-associated protein 1 |Homo sapiens	4	4	4	4	4	4	3	3	4	4	4	4	4	3	4	3	23758100	12344730	20067750	14414210	11833300	33664100	16377900	18459600	10090290	8761280	7846550	7207290	13008540	12393500	16952400	7077300
Q9P2D1;Q3L8U1;Q8TD26;Q9HCK8;O14647;O14646	>Q9P2D1|CHD7_HUMAN Chromodomain-helicase-DNA-binding protein 7 |Homo sapiens;>Q3L8U1|CHD9_HUMAN Chromodomain-helicase-DNA-binding protein 9 |Homo sapiens;>Q8TD26|CHD6_HUMAN Chromodomain-helicase-DNA-binding protein 6 |Homo sapiens;>Q9HCK8|CHD8_HUMAN Chromo	1	0	0	1	1	0	1	1	1	1	0	1	1	0	0	0	354680	0	0	440890	479150	0	596060	727220	845820	427140	0	531600	1061500	0	0	0
P14618	>P14618|KPYM_HUMAN Pyruvate kinase isozymes M1/M2 |Homo sapiens	83	82	78	71	83	86	74	73	80	76	74	69	80	63	67	70	4116798570	2437291490	1535789070	1031965808	3402960760	3739601000	2014472100	1348047880	2649440450	1911888530	1217014330	965778520	3441736510	2500178460	1.41626e+09	621479410
Q15366;P57721;Q15365	>Q15366|PCBP2_HUMAN Poly(rC)-binding protein 2 |Homo sapiens;>P57721|PCBP3_HUMAN Poly(rC)-binding protein 3 |Homo sapiens;>Q15365|PCBP1_HUMAN Poly(rC)-binding protein 1 |Homo sapiens	5	5	5	5	5	5	5	5	5	5	5	5	5	5	5	6	19557400	17962700	17957400	18852900	10932910	22316400	18589150	25050620	12560260	14803100	19720100	17550700	10635240	18583900	17874930	13838160
CON__P60712;P60709;Q6S8J3;A5A3E0;Q9BYX7;P63261;P68032;P68133;P62736;P63267;Q562R1	>P60712 SWISS-PROT:P60712 (Bos taurus) Actin, cytoplasmic 1;>P60709|ACTB_HUMAN Actin, cytoplasmic 1 |Homo sapiens;>Q6S8J3|POTEE_HUMAN POTE ankyrin domain family member E |Homo sapiens;>A5A3E0|POTEF_HUMAN POTE ankyrin domain family member F |Homo sapiens;>Q	2	2	2	2	2	2	2	2	2	2	2	2	2	2	2	2	100817000	137578000	98480000	180758000	181284000	174407000	168956000	234614000	90130000	139495000	152981000	199363000	104540000	157484000	161299000	157428200
P04264;CON__P04264	>P04264|K2C1_HUMAN Keratin, type II cytoskeletal 1 |Homo sapiens;>P04264 SWISS-PROT:P04264 Tax_Id=9606 Gene_Symbol=KRT1 Keratin, type II cytoskeletal 1	18	16	17	18	16	20	21	21	15	13	17	14	7	8	14	20	65834700	88653970	42789650	136364660	32095020	145149610	265951450	143908740	49654740	56367260	118555810	48089660	7583720	10995730	96942250	113134620
Q05519	>Q05519|SRS11_HUMAN Serine/arginine-rich splicing factor 11 |Homo sapiens	2	2	1	2	2	2	2	2	2	2	2	2	2	1	2	2	5505700	3143000	1791600	2327200	6430000	7955800	5253900	3242000	2555500	2708000	3859600	2193640	5333400	2654400	2712990	2022010
P10599	>P10599|THIO_HUMAN Thioredoxin |Homo sapiens	10	10	10	9	9	10	10	10	9	9	10	10	10	9	9	9	76043730	54522810	60644750	36460060	42838600	72810050	51920700	52263500	38069530	46061000	47500820	23795630	40826433	46852430	45552200	24933710
Q9NUP9	>Q9NUP9|LIN7C_HUMAN Protein lin-7 homolog C |Homo sapiens	2	2	2	2	2	2	2	1	0	2	2	1	2	2	2	2	7822100	4434010	2518110	1855930	7835250	5172300	4099400	3069000	0	3098640	2318470	1611900	6849500	4620800	4266270	2582590
Q9P1U0	>Q9P1U0|RPA12_HUMAN DNA-directed RNA polymerase I subunit RPA12 |Homo sapiens	1	4	4	3	1	4	4	3	0	4	4	2	0	3	4	2	704900	24485600	51337700	12196800	942120	28090200	36005400	13113640	0	17211900	37849400	4454860	0	21862150	11888300	1696820
P49642	>P49642|PRI1_HUMAN DNA primase small subunit |Homo sapiens	2	1	0	0	2	1	0	2	2	2	0	0	2	2	2	0	1674390	572620	0	0	4197980	491110	0	1607990	2124580	1988220	0	0	2558800	1326690	3042890	0
P53621	>P53621|COPA_HUMAN Coatomer subunit alpha |Homo sapiens	43	84	35	61	73	49	66	76	73	80	15	67	75	73	75	57	66883808	1173758440	23919228	153893850	463591640	127420748	382322020	330968580	462664720	1115683770	9368800	251979070	390036766	825213410	6.04298e+08	126665265
CON__P02666	>P02666 SWISS-PROT:P02666 Beta-casein - Bos taurus (Bovine).	1	1	1	1	1	1	4	1	1	1	1	1	2	0	1	1	171050	105220	351210	246020	275010	148190	143944200	594390	145420	155890	396880	287040	6282110	0	16433	208920
Q9Y224	>Q9Y224|CN166_HUMAN UPF0568 protein C14orf166 |Homo sapiens	15	15	15	10	16	16	13	14	15	14	12	10	15	15	14	12	228320100	124675500	69133470	29791030	181503240	133457990	65629380	49375540	136248290	120242250	48193960	27531160	170493530	116168340	78418880	24528960
Q8NEB9	>Q8NEB9|PK3C3_HUMAN Phosphatidylinositol 3-kinase catalytic subunit type 3 |Homo sapiens	1	1	0	0	2	0	0	0	1	1	0	0	1	1	1	1	284190	722830	0	0	2562110	0	0	0	1154000	955540	0	0	1137600	1058400	919600	227610
Q99570	>Q99570|PI3R4_HUMAN Phosphoinositide 3-kinase regulatory subunit 4 |Homo sapiens	1	3	0	0	3	0	1	0	4	1	0	0	3	2	0	0	290590	1134750	0	0	2758320	0	215900	0	2231300	463690	0	0	2047320	801580	0	0
P09429	>P09429|HMGB1_HUMAN High mobility group protein B1 |Homo sapiens	9	9	10	8	8	10	9	8	8	8	9	8	10	9	9	9	89679300	37199870	35285240	23499340	28313000	36325700	38286780	40479000	37624900	31952000	37804470	21991110	62398100	38337600	25815660	13182380
Q96DI7	>Q96DI7|SNR40_HUMAN U5 small nuclear ribonucleoprotein 40 kDa protein |Homo sapiens	2	3	4	4	0	3	4	3	1	4	4	4	0	1	2	2	2182250	3882880	8258510	13659850	0	9609100	12629030	8403900	520580	3829270	10519340	16891900	0	1571400	2692410	6296400
O60493	>O60493|SNX3_HUMAN Sorting nexin-3 |Homo sapiens	1	1	1	2	1	2	2	1	1	1	1	1	1	1	2	2	848090	1471300	1152900	3364100	607480	9569300	6479800	2172900	507440	1136800	1117700	836780	491850	1407500	2508410	1704160
O75832	>O75832|PSD10_HUMAN 26S proteasome non-ATPase regulatory subunit 10 |Homo sapiens	7	7	9	10	7	8	9	9	4	7	10	10	5	8	8	10	22264720	41735590	49702400	81079200	22493670	34751600	57447400	94400600	11855570	33011790	72371650	90590520	14488000	35732140	48253170	51903200
Q9NTK5	>Q9NTK5|OLA1_HUMAN Obg-like ATPase 1 |Homo sapiens	5	4	5	3	5	6	4	2	5	5	4	5	5	4	2	1	11040440	7118860	4284640	2311400	12243010	14514840	7696450	2334660	5363750	4965130	2877750	2848000	12242450	7231060	3793990	993800
O14497	>O14497|ARI1A_HUMAN AT-rich interactive domain-containing protein 1A |Homo sapiens	2	5	23	44	1	3	43	48	0	3	34	43	3	4	35	42	1130060	2523530	25453190	148192690	450530	5893690	190223190	287869280	0	1159390	51053790	188485160	4637530	4958010	120729670	107513245
Q99996	>Q99996|AKAP9_HUMAN A-kinase anchor protein 9 |Homo sapiens	1	1	5	18	3	2	18	21	2	1	9	22	2	0	14	17	276990	75774	1178780	27881320	1328030	631420	28163074	49779350	922680	43857	4183720	48368540	523632	0	27305920	25378270
CON__Q3ZBD7	>Q3ZBD7 SWISS-PROT:Q3ZBD7 (Bos taurus) Glucose-6-phosphate isomerase	2	2	1	2	2	1	2	2	2	2	1	2	2	2	2	1	11514200	11368600	1660700	4499600	22627100	2734500	9568300	10251300	9755500	9496900	1569700	5639500	14930800	13436900	11167800	1549400
O15355	>O15355|PPM1G_HUMAN Protein phosphatase 1G |Homo sapiens	9	7	6	4	8	7	5	7	4	6	7	7	6	6	5	4	20557540	11361190	5605040	5019880	12065940	14582220	9229870	9307240	3525940	7630670	6354780	4472070	7592668	10316960	7580180	4557500
P26639	>P26639|SYTC_HUMAN Threonine--tRNA ligase, cytoplasmic |Homo sapiens	20	20	14	12	22	10	17	16	25	21	12	16	23	18	11	8	56376000	57882120	7409870	18155320	114572080	17412630	34824330	36500410	99146320	39603330	6988630	20616780	94134180	40528400	27014710	11842300
Q9UN86;Q13283	>Q9UN86|G3BP2_HUMAN Ras GTPase-activating protein-binding protein 2 |Homo sapiens;>Q13283|G3BP1_HUMAN Ras GTPase-activating protein-binding protein 1 |Homo sapiens	2	2	2	2	2	2	2	2	2	2	2	2	2	2	2	2	16067000	7662400	4643500	4821600	10122800	14329200	7054600	6704200	6692600	6536900	6408900	3695400	9778600	9834500	7449400	3821600
Q9NR30	>Q9NR30|DDX21_HUMAN Nucleolar RNA helicase 2 |Homo sapiens	25	21	22	17	22	22	20	23	21	22	22	20	26	19	16	18	66784270	54114786	22413360	18055330	63829210	58124530	40070300	51837910	82831820	72790760	44345880	32147600	103397423	71960080	61759250	19803460
Q13085;O00763	>Q13085|ACACA_HUMAN Acetyl-CoA carboxylase 1 |Homo sapiens;>O00763|ACACB_HUMAN Acetyl-CoA carboxylase 2 |Homo sapiens	0	1	0	1	0	1	1	1	2	1	0	1	1	1	1	1	0	10710000	0	1511500	0	939860	3425900	1612300	1981070	5127400	0	3662900	1255000	5728500	6424700	2723200
P50502	>P50502|F10A1_HUMAN Hsc70-interacting protein |Homo sapiens	1	1	1	1	1	1	1	1	1	1	1	1	1	1	0	0	33276000	12801000	14841000	9057800	12453000	7012300	8219200	9120400	13320000	10434000	7888800	8622600	20334000	35678000	0	0
P61970	>P61970|NTF2_HUMAN Nuclear transport factor 2 |Homo sapiens	1	1	1	1	0	1	1	1	1	1	1	1	1	1	1	1	2230900	1248300	2087000	1953400	0	2944700	3143500	2202900	1105900	984630	1225000	893680	1343700	1708700	2171100	909440
Q9Y5K8	>Q9Y5K8|VATD_HUMAN V-type proton ATPase subunit D |Homo sapiens	1	2	1	0	1	2	1	1	0	2	1	0	2	2	2	1	132140	2158890	394710	0	313140	3628600	636240	817230	0	2698940	682530	0	1456110	3342500	2783930	364660
P40939	>P40939|ECHA_HUMAN Trifunctional enzyme subunit alpha, mitochondrial |Homo sapiens	24	27	28	28	25	25	27	29	24	25	30	29	27	23	27	28	62763570	107833020	83987930	97732530	89364970	122075090	176869130	159538850	60169420	123733120	156789960	138189340	92089763	128260340	132957310	87788780
Q9NTJ4	>Q9NTJ4|MA2C1_HUMAN Alpha-mannosidase 2C1 |Homo sapiens	1	1	1	0	1	1	1	1	0	1	1	2	1	1	1	1	550090	750080	353320	0	787660	773140	1359800	1588400	0	445560	406570	2088170	393200	752510	1404200	636710
Q15436	>Q15436|SC23A_HUMAN Protein transport protein Sec23A |Homo sapiens	6	6	1	3	6	2	4	4	5	5	0	3	6	4	5	2	6268550	8260320	149130	3387480	15090330	827060	6501800	6821380	8598140	7851130	0	2335130	14456960	4957420	7226940	637550
P08590;P05976	>P08590|MYL3_HUMAN Myosin light chain 3 |Homo sapiens;>P05976|MYL1_HUMAN Myosin light chain 1/3, skeletal muscle isoform |Homo sapiens	1	1	1	1	1	1	1	1	0	1	1	1	0	1	1	1	839750	897840	2000700	2348600	747130	2435300	2706600	1844800	0	335190	1412100	1889300	0	547820	931620	1827900
O95059	>O95059|RPP14_HUMAN Ribonuclease P protein subunit p14 |Homo sapiens	0	0	1	2	0	0	2	2	0	0	1	2	0	0	2	2	0	0	548770	10435400	0	0	5005300	14539400	0	0	882830	9994600	0	0	4148900	11294700
Q9Y266	>Q9Y266|NUDC_HUMAN Nuclear migration protein nudC |Homo sapiens	8	8	8	8	9	9	9	9	6	7	7	7	7	7	7	9	24886320	19849964	21541420	18251560	17324250	38369650	27283400	25522570	9519140	13749129	20021980	12468400	14759657	19725070	21479000	11997870
P61604	>P61604|CH10_HUMAN 10 kDa heat shock protein, mitochondrial |Homo sapiens	13	11	11	7	12	11	10	8	10	11	12	11	11	10	12	9	98179810	47276330	38089860	18617030	58414960	97410100	56702280	28008420	26511230	40755490	36679130	20553930	53871690	50766500	41219180	21003060
Q07021	>Q07021|C1QBP_HUMAN Complement component 1 Q subcomponent-binding protein, mitochondrial |Homo sapiens	2	2	2	2	2	3	3	2	2	2	2	2	2	2	3	2	16736200	11615700	9841700	6152000	14462700	241130600	14572200	10164000	10355500	8615700	8032700	3975200	19350000	10941300	196169200	2590130
P07900;Q14568;Q58FG0	>P07900|HS90A_HUMAN Heat shock protein HSP 90-alpha |Homo sapiens;>Q14568|HS902_HUMAN Putative heat shock protein HSP 90-alpha A2 |Homo sapiens;>Q58FG0|HS905_HUMAN Putative heat shock protein HSP 90-alpha A5 |Homo sapiens	0	1	0	1	1	1	1	1	1	1	0	1	1	0	1	0	0	5177800	0	4147100	14945000	9541800	7112700	5919100	3918700	5824800	0	3147100	10202	0	7293600	0
P11940;Q9H361;Q5JQF8	>P11940|PABP1_HUMAN Polyadenylate-binding protein 1 |Homo sapiens;>Q9H361|PABP3_HUMAN Polyadenylate-binding protein 3 |Homo sapiens;>Q5JQF8|PAP1M_HUMAN Polyadenylate-binding protein 1-like 2 |Homo sapiens	1	1	1	1	1	1	1	1	1	1	1	1	1	1	1	0	1481900	984600	1398600	1784000	770780	2811100	3423800	3064400	675240	762080	1246700	1903400	1600800	1393700	4051400	0
Q5VZL5	>Q5VZL5|ZMYM4_HUMAN Zinc finger MYM-type protein 4 |Homo sapiens	1	0	0	1	2	0	1	0	5	1	0	0	1	1	0	1	739350	0	0	225040	80991690	0	342300	0	71427820	78609000	0	0	1381300	960390	0	96681000
CON__P13645;P13645;CON__Q7Z3Y7;CON__Q148H6;Q7Z3Y7;CON__Q7Z3Y8;Q7Z3Y8;CON__Q7Z3Z0;Q7Z3Z0	>P13645 SWISS-PROT:P13645 Tax_Id=9606 Gene_Symbol=KRT10 Keratin, type I cytoskeletal 10;>P13645|K1C10_HUMAN Keratin, type I cytoskeletal 10 |Homo sapiens;>Q7Z3Y7 SWISS-PROT:Q7Z3Y7 Tax_Id=9606 Gene_Symbol=KRT28 Keratin 25D;>Q148H6 TREMBL:Q148H6 (Bos taurus)	1	1	1	1	1	1	1	1	1	1	1	1	0	1	1	1	1620700	1218600	1633100	1873200	490630	1795600	11863000	4239200	421310	1091300	2759700	929320	0	298370	3035600	742960
Q6I9Y2	>Q6I9Y2|THOC7_HUMAN THO complex subunit 7 homolog |Homo sapiens	10	11	13	11	12	12	11	12	12	13	13	11	9	12	11	12	48766330	83499760	76784200	42441230	34807670	86289670	85242630	48580140	28667200	69432740	106901400	40313840	33960639	82991950	52692500	29923950
P59998	>P59998|ARPC4_HUMAN Actin-related protein 2/3 complex subunit 4 |Homo sapiens	7	7	5	6	8	6	7	7	8	6	5	7	8	7	7	4	43160600	33107610	5424150	12950590	84805700	22577100	25184190	22244090	75831600	37159500	5396460	12314730	82862900	31253170	30684020	11340580
Q01780	>Q01780|EXOSX_HUMAN Exosome component 10 |Homo sapiens	54	54	38	32	56	45	33	33	61	60	40	33	56	50	36	24	241802770	302786660	46290290	43186550	309735670	177477860	78993358	58193270	325128200	344946420	60894930	54933810	289295940	265719853	103742137	26636644
P28066	>P28066|PSA5_HUMAN Proteasome subunit alpha type-5 |Homo sapiens	12	11	11	14	9	10	6	14	6	11	9	14	11	8	8	13	41118090	27998900	19380460	204182700	25805240	48967350	25547730	119613000	17551230	26915580	23679510	256873300	32503170	24126410	19176110	138374610
O14980	>O14980|XPO1_HUMAN Exportin-1 |Homo sapiens	10	12	3	12	13	4	10	11	14	11	1	13	15	12	11	7	16703460	52570140	2923670	17467950	61408400	3176770	24263790	32302790	64752220	47791500	2825300	21791230	56319110	48269850	34160700	7996670
Q9Y265	>Q9Y265|RUVB1_HUMAN RuvB-like 1 |Homo sapiens	64	69	74	71	66	72	76	70	65	70	74	69	64	65	64	65	873035330	1844027070	1897487340	1468196100	648513140	2017108260	2863216880	1803415480	850365670	1696726690	2322948040	1297637060	989289582	1684456170	1665367960	1100435340
O43818	>O43818|U3IP2_HUMAN U3 small nucleolar RNA-interacting protein 2 |Homo sapiens	1	1	0	1	1	0	0	0	1	1	0	1	1	0	0	0	517120	508160	0	246330	1738900	0	0	0	1324600	746600	0	248800	570100	0	0	0
P23368	>P23368|MAOM_HUMAN NAD-dependent malic enzyme, mitochondrial |Homo sapiens	3	1	0	1	3	0	1	1	3	2	0	0	2	1	1	1	6479100	1236300	0	1191800	10712500	0	443220	676890	5511700	2145320	0	0	3613300	897600	1299100	1164300
O95749	>O95749|GGPPS_HUMAN Geranylgeranyl pyrophosphate synthase |Homo sapiens	2	1	2	1	2	2	2	1	2	1	1	1	2	2	2	1	4859630	1512400	773080	371980	3629280	2205240	1878490	279100	2639960	1419400	756550	525130	3971530	2880510	2799300	1143900
Q9NRR5	>Q9NRR5|UBQL4_HUMAN Ubiquilin-4 |Homo sapiens	4	3	2	3	1	4	3	3	2	4	4	3	3	4	2	1	10588150	6748330	4426710	4834060	3943000	13350300	6799400	3690020	3889640	12841290	6662810	3192600	6072730	10863750	2753300	646220
Q9BRS2	>Q9BRS2|RIOK1_HUMAN Serine/threonine-protein kinase RIO1 |Homo sapiens	2	3	4	3	4	4	4	2	4	7	7	3	2	5	5	3	2878200	7007500	4814180	2594040	3899840	9196800	9067610	3033700	3252710	15814960	14745130	4136400	1748390	10263810	11904300	2816760
P11142;P54652	>P11142|HSP7C_HUMAN Heat shock cognate 71 kDa protein |Homo sapiens;>P54652|HSP72_HUMAN Heat shock-related 70 kDa protein 2 |Homo sapiens	9	9	9	10	10	10	10	9	9	9	9	9	9	9	10	9	1487962000	1318002100	1067533000	881236400	861370680	1322761200	1399012230	965279000	858477700	1199404000	1285624000	1065755500	1170570000	1253345000	1122428400	830226000
P11142	>P11142|HSP7C_HUMAN Heat shock cognate 71 kDa protein |Homo sapiens	64	64	68	71	65	70	70	69	58	62	68	65	60	59	68	67	2295670600	2169027870	1930361990	1807342930	1476571823	2666447480	2877909740	1909210040	1668333610	2026287340	2427910710	1799614990	1913609670	2071803260	2057682480	1433397520
Q71U36;Q13748;Q6PEY2;Q9BQE3	>Q71U36|TBA1A_HUMAN Tubulin alpha-1A chain |Homo sapiens;>Q13748|TBA3C_HUMAN Tubulin alpha-3C/D chain |Homo sapiens;>Q6PEY2|TBA3E_HUMAN Tubulin alpha-3E chain |Homo sapiens;>Q9BQE3|TBA1C_HUMAN Tubulin alpha-1C chain |Homo sapiens	4	3	4	3	3	3	3	4	3	4	4	4	4	3	4	4	61735750	88423800	130022000	148571100	37649400	66664800	127763900	180350100	28563500	77921900	147862500	134297400	40871690	79530500	77174440	60414600
Q9Y5F3	>Q9Y5F3|PCDB1_HUMAN Protocadherin beta-1 |Homo sapiens	0	0	0	0	0	0	0	0	0	0	0	0	0	0	0	0	0	0	0	0	0	0	0	0	0	0	0	0	0	0	0	0
Q15056	>Q15056|IF4H_HUMAN Eukaryotic translation initiation factor 4H |Homo sapiens	4	4	5	5	4	5	5	5	4	4	5	2	5	5	3	3	10719300	4875480	4409110	4218970	9433500	10333260	5675030	5557100	5775450	5535210	3465180	892980	5075808	7315100	5740300	3077280
O00571;O15523;Q9NQI0	>O00571|DDX3X_HUMAN ATP-dependent RNA helicase DDX3X |Homo sapiens;>O15523|DDX3Y_HUMAN ATP-dependent RNA helicase DDX3Y |Homo sapiens;>Q9NQI0|DDX4_HUMAN Probable ATP-dependent RNA helicase DDX4 |Homo sapiens	1	1	1	1	1	1	1	1	1	1	1	1	1	1	1	1	3662400	1940000	983710	496030	1278900	1052500	620140	693080	3031600	2020900	1384500	772060	3091700	2510700	1006800	266570
P61923	>P61923|COPZ1_HUMAN Coatomer subunit zeta-1 |Homo sapiens	5	7	6	6	8	8	7	7	6	7	6	6	5	8	7	6	44488540	183789700	42466960	41824910	108610970	248079700	127952400	75613600	68197990	158096940	42831210	45102120	63111090	215890400	160553000	52815600
Q3ZCM7	>Q3ZCM7|TBB8_HUMAN Tubulin beta-8 chain |Homo sapiens	6	6	6	6	6	6	6	6	5	5	6	6	6	6	6	6	221271200	400369600	474330900	531363000	217184100	344454000	645829500	597157800	130741970	266617800	523271100	570517200	161792180	286286480	242081600	275127000
Q9BXS5	>Q9BXS5|AP1M1_HUMAN AP-1 complex subunit mu-1 |Homo sapiens	3	2	0	0	3	0	1	0	2	3	2	2	3	2	1	0	2341430	2063520	0	0	4033540	0	451340	0	3453300	2313850	1406750	1087650	4102300	2412610	1088600	0
Q9Y315	>Q9Y315|DEOC_HUMAN Putative deoxyribose-phosphate aldolase |Homo sapiens	0	2	1	1	0	0	1	2	0	2	1	2	0	1	2	0	0	2999000	365600	1171700	0	0	2960800	9977300	0	3743800	1066300	4832400	0	1446200	3900230	0
P61163	>P61163|ACTZ_HUMAN Alpha-centractin |Homo sapiens	13	21	33	33	9	18	36	36	10	18	35	33	15	20	33	37	37284770	84157880	486783100	748690280	35162390	145425140	907576100	853941140	11954980	63613840	1133558740	787948800	44079770	86730130	564561850	692725400
Q8TBC3	>Q8TBC3|SHKB1_HUMAN SH3KBP1-binding protein 1 |Homo sapiens	1	1	1	1	1	1	1	1	0	1	0	1	0	1	0	0	790360	251040	708550	557070	754330	944750	843980	1078300	0	402060	0	914020	0	337180	0	0
O60678	>O60678|ANM3_HUMAN Protein arginine N-methyltransferase 3 |Homo sapiens	2	2	1	0	2	2	0	1	2	1	0	1	1	1	1	1	2729800	12664590	316480	0	2658800	1235820	0	527640	2183800	595340	0	297220	1118700	930140	513800	635380
Q9ULG1	>Q9ULG1|INO80_HUMAN DNA helicase INO80 |Homo sapiens	0	1	0	9	2	1	6	9	0	2	1	8	0	1	1	7	0	490630	0	7039460	1327090	1414600	3660340	15804790	0	425290	390810	8219450	0	148530	755020	4845490
Q9UHX1	>Q9UHX1|PUF60_HUMAN Poly(U)-binding-splicing factor PUF60 |Homo sapiens	3	3	3	3	3	3	3	3	2	2	1	3	2	2	3	1	7287600	4486600	3663300	3961300	9838600	11220200	8351300	6465600	1972510	2640860	862940	2393860	2522510	3052100	5582800	1534500
Q9Y2D4	>Q9Y2D4|EXC6B_HUMAN Exocyst complex component 6B |Homo sapiens	0	1	0	0	0	0	0	0	1	0	0	0	0	0	0	0	0	1134800	0	0	0	0	0	0	2209700	0	0	0	0	0	0	0
Q5VYK3	>Q5VYK3|ECM29_HUMAN Proteasome-associated protein ECM29 homolog |Homo sapiens	4	4	0	2	4	0	2	4	3	2	1	4	4	4	4	2	2492160	5426190	0	887130	6970310	0	2306940	5706490	2871810	1471050	205350	2424540	4528793	5972180	6457430	1537220
P47755	>P47755|CAZA2_HUMAN F-actin-capping protein subunit alpha-2 |Homo sapiens	4	5	6	6	3	5	6	6	2	6	6	6	4	5	5	5	11559800	11495470	24806600	28708600	3925120	15276200	32462400	33543600	2038690	11842820	38334700	21799200	9251160	11472400	23974800	23807900
Q9HBM6	>Q9HBM6|TAF9B_HUMAN Transcription initiation factor TFIID subunit 9B |Homo sapiens	1	1	3	3	1	3	3	2	0	2	3	3	0	1	3	2	320310	610900	3093430	2505780	302020	1763940	2572721	2153100	0	506550	3700550	2087280	0	500970	3248900	2901800
P07437;P68371;Q9BVA1;Q13885	>P07437|TBB5_HUMAN Tubulin beta chain |Homo sapiens;>P68371|TBB4B_HUMAN Tubulin beta-4B chain |Homo sapiens;>Q9BVA1|TBB2B_HUMAN Tubulin beta-2B chain |Homo sapiens;>Q13885|TBB2A_HUMAN Tubulin beta-2A chain |Homo sapiens	15	17	18	19	17	18	16	17	14	15	18	20	15	16	22	25	691808310	911887410	1234565720	1311831590	545041240	1086244500	1426760780	1927144000	452419810	709113860	1753620340	1210062560	606374190	788253510	979524330	1053951230
Q8TF46	>Q8TF46|DI3L1_HUMAN DIS3-like exonuclease 1 |Homo sapiens	0	1	0	0	0	0	0	0	1	1	0	0	0	1	0	0	0	723050	0	0	0	0	0	0	309300	657210	0	0	0	495380	0	0
P04179	>P04179|SODM_HUMAN Superoxide dismutase [Mn], mitochondrial |Homo sapiens	1	1	1	1	1	1	1	1	1	1	1	1	1	1	1	1	2242000	801900	791570	579840	1546000	4215200	2193800	960250	1486200	1039800	771680	566730	1853000	1925400	2063700	1228300
Q96S59	>Q96S59|RANB9_HUMAN Ran-binding protein 9 |Homo sapiens	1	1	7	13	1	1	5	13	0	0	8	15	0	1	3	11	255440	500560	7401590	43051580	811450	1803600	6110360	60323510	0	0	11498400	43039880	0	258090	2699830	29638020
REV__O95347	>O95347|SMC2_HUMAN Structural maintenance of chromosomes protein 2 |Homo sapiens	1	1	2	1	2	2	1	1	2	2	2	1	0	1	1	0	80882	9025800	10858300	540220	1947641	13358350	23005000	170390	3103420	13222600	26226700	26111000	0	6902300	10018000	0
P34932;Q92598	>P34932|HSP74_HUMAN Heat shock 70 kDa protein 4 |Homo sapiens;>Q92598|HS105_HUMAN Heat shock protein 105 kDa |Homo sapiens	1	1	1	1	1	1	1	1	1	1	1	1	1	1	1	1	9685900	9142800	3952200	3665400	4071600	7724800	5622900	5641100	7624500	6029100	4406200	3912000	8051800	890750	5273600	1256100
P55010	>P55010|IF5_HUMAN Eukaryotic translation initiation factor 5 |Homo sapiens	1	1	1	1	1	1	1	1	1	1	1	1	1	2	1	0	1603000	1160800	504150	307720	2245300	1367000	1083600	971760	807010	823410	781440	464480	1360800	1831130	869050	0
Q6IBW4	>Q6IBW4|CNDH2_HUMAN Condensin-2 complex subunit H2 |Homo sapiens	7	7	5	4	7	6	5	6	6	7	5	3	7	5	3	3	19069350	17747410	7710450	4687110	15767740	23039380	10819260	7143300	9665150	16076620	8071120	2904410	15103420	10048740	7129440	3077340
Q9P2Y5	>Q9P2Y5|UVRAG_HUMAN UV radiation resistance-associated gene protein |Homo sapiens	1	1	0	0	0	0	0	0	1	1	0	0	2	1	0	0	646840	745700	0	0	0	0	0	0	753850	652720	0	0	1256710	749540	0	0
Q9BUJ2	>Q9BUJ2|HNRL1_HUMAN Heterogeneous nuclear ribonucleoprotein U-like protein 1 |Homo sapiens	9	8	6	2	7	4	2	5	8	5	6	3	8	5	1	1	19811410	12482460	5873480	2697190	11878170	11576520	2175820	6445020	12028410	9183350	6576170	1838790	14353500	8216290	798380	959870
Q9C0C9	>Q9C0C9|UBE2O_HUMAN Ubiquitin-conjugating enzyme E2 O |Homo sapiens	4	4	1	1	4	2	3	4	4	4	2	2	4	3	0	0	4880530	5028720	367410	376710	6045970	1687150	3471140	6206070	5328150	3025590	752650	1014090	5011030	4482060	0	0
O43707	>O43707|ACTN4_HUMAN Alpha-actinin-4 |Homo sapiens	6	6	6	6	9	9	10	6	6	4	4	7	6	5	6	7	12153720	12462290	6058740	8045430	53574920	37748500	20398800	19150500	10891870	8545100	4081310	7811230	11172470	11062370	17359400	8110460
CON__P20930;P20930	>P20930 SWISS-PROT:P20930 Tax_Id=9606 Gene_Symbol=FLG Filaggrin;>P20930|FILA_HUMAN Filaggrin |Homo sapiens	0	0	0	0	1	1	1	1	0	0	0	0	0	0	0	0	0	0	0	0	4959100	16582000	206650	123980	0	0	0	0	0	0	0	0
Q9BV19	>Q9BV19|CA050_HUMAN Uncharacterized protein C1orf50 |Homo sapiens	0	3	4	5	0	5	5	3	0	5	5	2	0	5	4	4	0	10837700	14286400	7523610	0	27548800	24286550	4784000	0	26678200	40170600	2078940	0	25864000	15390500	5902360
Q13573	>Q13573|SNW1_HUMAN SNW domain-containing protein 1 |Homo sapiens	1	1	1	1	1	1	1	1	1	1	1	1	1	1	0	0	2224700	1229900	1472900	893480	2062000	3090700	1849300	1123700	943070	1200100	1790400	732700	1714300	1382900	0	0
Q01813	>Q01813|K6PP_HUMAN 6-phosphofructokinase type C |Homo sapiens	2	2	1	2	2	0	1	2	3	2	1	2	2	2	1	1	1426060	3688660	147840	6716530	2717800	0	323360	12482800	2545860	3018050	296330	7120190	2303170	3059870	345300	270100
Q09028	>Q09028|RBBP4_HUMAN Histone-binding protein RBBP4 |Homo sapiens	25	27	28	26	25	27	27	25	20	27	28	23	20	24	25	19	331444870	878573520	810059659	266859950	243846750	919013900	952559000	313815435	215884190	868417680	1073075870	292902890	284005230	666724420	444268041	157309480
Q9UPN3;Q96PK2	>Q9UPN3|MACF1_HUMAN Microtubule-actin cross-linking factor 1, isoforms 1/2/3/5 |Homo sapiens;>Q96PK2|MACF4_HUMAN Microtubule-actin cross-linking factor 1, isoform 4 |Homo sapiens	2	2	0	1	2	1	2	2	1	1	1	2	1	2	3	1	13380600	47613200	0	380350	29705000	4099200	3963300	6644800	551210	2437200	2961600	1778830	15615000	4783360	3.92495e+06	154650
P53618	>P53618|COPB_HUMAN Coatomer subunit beta |Homo sapiens	14	30	10	21	30	18	28	26	25	30	8	22	27	31	25	20	17100970	366828520	6713570	46624810	147257160	55475190	109450280	92444380	120075110	280630550	5359970	60901130	114554920	213312020	152991300	41016000
O15294	>O15294|OGT1_HUMAN UDP-N-acetylglucosamine--peptide N-acetylglucosaminyltransferase 110 kDa subunit |Homo sapiens	13	13	7	8	13	10	11	12	13	12	8	11	14	13	12	8	23060290	30817640	3781860	8053280	43554600	18557020	20862020	21694120	33829950	30038200	8371280	15433460	36468220	26735550	24619720	8446470
O75348;O95670	>O75348|VATG1_HUMAN V-type proton ATPase subunit G 1 |Homo sapiens;>O95670|VATG2_HUMAN V-type proton ATPase subunit G 2 |Homo sapiens	1	2	2	2	3	3	3	3	1	2	2	2	1	3	3	2	6295500	16161800	14165800	4793400	12408800	58429000	27275800	13375720	2186700	13674600	9328800	2576460	2929800	34005500	29137200	5993100
P27348	>P27348|1433T_HUMAN 14-3-3 protein theta |Homo sapiens	11	12	12	11	11	10	10	10	10	12	11	7	12	11	7	8	85859100	35452820	67983180	17113050	41233589	47450240	29020750	26266330	28576670	31315100	25968390	15607800	50297410	34568680	31298210	22916840
Q9UKN8	>Q9UKN8|TF3C4_HUMAN General transcription factor 3C polypeptide 4 |Homo sapiens	5	12	9	10	7	9	10	9	8	13	6	11	9	13	11	9	1908630	52777960	6030300	16921370	11826230	15172280	29288230	29712380	10422780	50120750	6304320	23137910	13398330	38808690	38343090	13160570
P54886	>P54886|P5CS_HUMAN Delta-1-pyrroline-5-carboxylate synthase |Homo sapiens	32	35	23	25	36	32	28	32	36	34	26	25	36	35	28	23	212345510	222108600	23696270	35335210	298441210	124188180	79469700	85424650	267303650	216991430	34408500	41655890	292168731	237525360	81826440	29940950
Q9UBW8	>Q9UBW8|CSN7A_HUMAN COP9 signalosome complex subunit 7a |Homo sapiens	15	14	13	5	16	15	11	9	14	15	10	5	15	13	9	7	58970220	35156650	12732280	3645890	69205600	49331010	16297580	7095380	55191340	40378610	11912530	3993210	54777840	35202040	13090240	4501560
Q9UFH2	>Q9UFH2|DYH17_HUMAN Dynein heavy chain 17, axonemal |Homo sapiens	2	2	2	1	1	0	1	3	1	1	1	1	1	1	2	2	53691300	29037800	20479650	1238100	5035800	0	2607800	18715420	2765400	2580700	855420	1098700	4518500	3084900	23521000	6216700
Q9UBT2	>Q9UBT2|SAE2_HUMAN SUMO-activating enzyme subunit 2 |Homo sapiens	7	6	4	4	7	5	4	5	6	6	4	5	6	5	4	3	31521700	16617900	3757720	3640840	23963190	9266470	5985030	10608000	14941000	12920240	3801710	4879390	20525100	11553100	5343690	1518470
Q6Y7W6	>Q6Y7W6|PERQ2_HUMAN PERQ amino acid-rich with GYF domain-containing protein 2 |Homo sapiens	1	2	3	2	1	2	1	0	1	2	3	2	2	1	1	1	318490	1406480	1980360	1441240	385120	2941900	1387200	0	148750	589310	1849380	1317580	1159680	1748700	1893500	554690
Q9Y5Q9	>Q9Y5Q9|TF3C3_HUMAN General transcription factor 3C polypeptide 3 |Homo sapiens	2	9	2	7	6	4	7	8	7	8	3	8	7	6	7	7	794470	38622800	746710	8918560	7795060	3164910	16948280	26397200	8862530	23724600	1323420	14222470	9884960	16012700	27782200	10342380
P22314	>P22314|UBA1_HUMAN Ubiquitin-like modifier-activating enzyme 1 |Homo sapiens	46	44	40	42	49	42	41	46	46	45	39	40	47	43	39	36	347831150	307653670	101506200	132054910	466345770	222325660	220390590	217571040	414506750	237139870	63795530	117433230	369821547	251204003	228535320	81808060
Q9P2K2	>Q9P2K2|TXD16_HUMAN Thioredoxin domain-containing protein 16 |Homo sapiens	1	1	0	0	2	0	0	1	2	2	0	0	2	2	0	0	21577000	1677400	0	0	22892000	0	0	792780	2851300	14422100	0	0	37117300	17041900	0	0
Q92769	>Q92769|HDAC2_HUMAN Histone deacetylase 2 |Homo sapiens	15	18	16	13	15	16	16	15	13	16	15	14	12	14	17	14	47883800	164816830	67524400	51425000	46337666	129664964	157560040	75675790	30642040	130950740	195959820	70099500	44265273	122649860	104571450	21644344
Q9Y2W1	>Q9Y2W1|TR150_HUMAN Thyroid hormone receptor-associated protein 3 |Homo sapiens	9	8	7	7	7	9	7	8	4	5	7	4	4	7	4	3	18175570	13213810	11539560	6548200	11922940	24122800	16295800	10785650	2850770	3741080	7510590	3086780	2291816	6316630	3598310	1847610
Q6W2J9	>Q6W2J9|BCOR_HUMAN BCL-6 corepressor |Homo sapiens	0	0	0	1	0	1	1	0	0	1	0	0	1	1	0	0	0	0	0	649890	0	1655000	1636900	0	0	614820	0	0	552230	32926000	0	0
P12955	>P12955|PEPD_HUMAN Xaa-Pro dipeptidase |Homo sapiens	5	5	5	5	4	5	5	4	3	5	5	3	5	5	3	1	13482200	8673800	4849170	3411160	9860800	8959800	5992600	3842240	3781200	7067720	4077400	1765450	9451200	9311400	4630000	648660
O75376	>O75376|NCOR1_HUMAN Nuclear receptor corepressor 1 |Homo sapiens	5	5	5	5	5	4	4	4	3	5	6	4	4	5	3	2	6422860	4739580	3685610	4221430	8154770	8563220	5195150	5370720	4701070	4966980	5954860	2350350	4690810	5976000	2293530	2265060
Q9UJC3	>Q9UJC3|HOOK1_HUMAN Protein Hook homolog 1 |Homo sapiens	1	0	1	1	1	1	0	0	1	0	1	1	1	1	0	1	237110	0	216960	321590	218000	483420	0	0	199950	0	243340	219880	164120	202340	0	264310
Q86XP3	>Q86XP3|DDX42_HUMAN ATP-dependent RNA helicase DDX42 |Homo sapiens	30	28	27	16	33	32	21	20	31	28	24	16	29	27	21	13	217893840	156926340	59363490	25789430	170043470	160404670	56629820	39231520	176983860	187884490	55257770	30392320	170146480	184951090	61157216	15544190
Q9UBB5	>Q9UBB5|MBD2_HUMAN Methyl-CpG-binding domain protein 2 |Homo sapiens	2	3	4	3	1	4	4	2	2	4	4	4	2	3	3	3	1807310	8530200	6505387	2771530	446870	8596080	7687040	2102090	785230	6914010	14253760	3145421	883200	6711600	7567400	1777820
O60547	>O60547|GMDS_HUMAN GDP-mannose 4,6 dehydratase |Homo sapiens	2	2	0	0	2	0	0	1	1	2	1	1	1	1	0	0	3827860	3572070	0	0	903740	0	0	652700	286400	2217470	853970	2517400	360530	1451400	0	0
Q7Z3U7	>Q7Z3U7|MON2_HUMAN Protein MON2 homolog |Homo sapiens	0	1	0	1	1	0	1	0	2	0	0	2	2	0	0	1	0	445970	0	1063000	655810	0	667750	0	1295610	0	0	1377160	1333560	0	0	185430
Q9NX24	>Q9NX24|NHP2_HUMAN H/ACA ribonucleoprotein complex subunit 2 |Homo sapiens	9	9	9	5	9	9	7	6	7	6	9	4	8	6	6	3	48450480	18110360	10607550	2493820	39609550	47350400	13069300	5683220	16956810	9417320	12500950	2275390	24521760	15561200	6478554	3013730
Q96MX6	>Q96MX6|WDR92_HUMAN WD repeat-containing protein 92 |Homo sapiens	6	6	6	4	5	6	6	3	3	6	4	3	6	4	2	3	23626990	22153600	13655610	6797570	13698900	25884740	12587010	10153000	12554900	20634180	12583730	5344600	15499510	13487320	7798700	5507050
P08238;Q58FF7;Q58FF6	>P08238|HS90B_HUMAN Heat shock protein HSP 90-beta |Homo sapiens;>Q58FF7|H90B3_HUMAN Putative heat shock protein HSP 90-beta-3 |Homo sapiens;>Q58FF6|H90B4_HUMAN Putative heat shock protein HSP 90-beta 4 |Homo sapiens	4	3	4	3	3	3	3	3	3	3	3	3	4	2	2	4	92258900	55460200	37421800	15370300	19823820	34122900	25205600	18738500	42868600	57732500	23852800	24264500	61849700	3789050	1242040	11355860
Q8WYA0	>Q8WYA0|IFT81_HUMAN Intraflagellar transport protein 81 homolog |Homo sapiens	0	0	0	0	0	0	0	0	0	0	1	0	0	0	0	0	0	0	0	0	0	0	0	0	0	0	1342600	0	0	0	0	0
Q9NQS1	>Q9NQS1|AVEN_HUMAN Cell death regulator Aven |Homo sapiens	1	1	1	1	1	1	1	1	1	1	1	1	1	1	0	0	3648000	1565200	1371400	900930	3104900	2547700	1553400	955930	3224800	1875400	1570200	290030	3351100	1603300	0	0
Q7Z406	>Q7Z406|MYH14_HUMAN Myosin-14 |Homo sapiens	1	1	0	0	2	1	0	1	1	1	0	1	0	0	1	0	902520	2839300	0	0	7773400	707410	0	3702200	1738100	2820800	0	849570	0	0	2641500	0
P18669;P15259	>P18669|PGAM1_HUMAN Phosphoglycerate mutase 1 |Homo sapiens;>P15259|PGAM2_HUMAN Phosphoglycerate mutase 2 |Homo sapiens	4	3	4	4	4	4	4	4	3	3	3	3	3	4	4	3	29212300	15641100	11466920	11215800	13816590	30871150	22093900	14017000	10900300	18912200	10918700	10439900	13850300	21708725	34608400	7388500
Q14980	>Q14980|NUMA1_HUMAN Nuclear mitotic apparatus protein 1 |Homo sapiens	31	48	37	52	44	38	51	59	30	43	49	59	36	34	47	50	31607897	77569180	42262010	139132720	58323991	63177770	150598660	215848670	38717830	78605870	92085520	201686600	50238203	61278800	125950723	114971710
Q5RKV6	>Q5RKV6|EXOS6_HUMAN Exosome complex component MTR3 |Homo sapiens	15	14	13	9	13	14	10	14	14	13	12	9	14	12	11	7	182555100	121842135	40461950	13136070	121712000	148609700	63653100	29050430	109793840	136372200	70022400	14932820	154502000	168000500	54641500	12774180
P07195;P00338;Q6ZMR3	>P07195|LDHB_HUMAN L-lactate dehydrogenase B chain |Homo sapiens;>P00338|LDHA_HUMAN L-lactate dehydrogenase A chain |Homo sapiens;>Q6ZMR3|LDH6A_HUMAN L-lactate dehydrogenase A-like 6A |Homo sapiens	1	1	1	1	1	1	1	1	1	1	1	1	1	1	1	1	232870000	133950000	46541000	45073000	233860000	89190000	97996000	100120000	257360000	154030000	39116000	58047000	299360000	167870000	73387000	24167000
Q3B726	>Q3B726|RPA43_HUMAN DNA-directed RNA polymerase I subunit RPA43 |Homo sapiens	0	0	1	0	0	1	1	0	0	0	1	0	0	0	0	0	0	0	267400	0	0	187930	690630	0	0	0	873570	0	0	0	0	0
Q6ZV73	>Q6ZV73|FGD6_HUMAN FYVE, RhoGEF and PH domain-containing protein 6 |Homo sapiens	1	1	1	1	1	1	1	1	1	1	1	1	1	1	1	1	2838500	2523500	1687300	2151300	5699700	8648800	5419000	4119000	2014200	2097400	2075800	1765500	2965200	4071100	3389800	1652900
P51858	>P51858|HDGF_HUMAN Hepatoma-derived growth factor |Homo sapiens	2	3	3	2	3	3	0	2	2	3	2	2	3	2	2	1	2326210	2565560	2857830	2932740	2518750	3588260	0	3332500	906840	2028940	2762300	1435480	3171220	2891710	2904300	627200
Q9Y2B0	>Q9Y2B0|CNPY2_HUMAN Protein canopy homolog 2 |Homo sapiens	1	1	1	1	1	1	1	1	1	1	1	1	1	1	1	1	1168300	914600	1296500	787630	806930	2250800	1558500	1270700	934130	1057100	1236100	401270	877480	1248200	1081300	868740
P06753;P67936	>P06753|TPM3_HUMAN Tropomyosin alpha-3 chain |Homo sapiens;>P67936|TPM4_HUMAN Tropomyosin alpha-4 chain |Homo sapiens	2	2	2	1	2	2	1	2	2	1	2	2	2	2	2	2	4784400	3170630	2584330	2590200	4299100	7666400	1647300	11398400	2246670	1443300	5799800	2139100	24171500	13265130	1484850	3263200
Q92784;Q8WYB5;Q92794;Q92782;Q92785	>Q92784|DPF3_HUMAN Zinc finger protein DPF3 |Homo sapiens;>Q8WYB5|KAT6B_HUMAN Histone acetyltransferase KAT6B |Homo sapiens;>Q92794|KAT6A_HUMAN Histone acetyltransferase KAT6A |Homo sapiens;>Q92782|DPF1_HUMAN Zinc finger protein neuro-d4 |Homo sapiens;>Q92	1	1	1	1	0	1	1	1	0	1	1	1	0	0	1	1	334070	865980	9424800	7919600	0	720620	10244000	11330000	0	501190	12977000	9094100	0	0	5587700	5543400
Q12905	>Q12905|ILF2_HUMAN Interleukin enhancer-binding factor 2 |Homo sapiens	6	6	4	6	6	5	5	6	6	6	5	6	6	6	5	3	12913230	13826140	2429340	7203430	18321000	9036600	13020600	13758300	17256700	12964800	3432540	8025940	21176900	13009200	11551900	2495010
P63151;Q66LE6	>P63151|2ABA_HUMAN Serine/threonine-protein phosphatase 2A 55 kDa regulatory subunit B alpha isoform |Homo sapiens;>Q66LE6|2ABD_HUMAN Serine/threonine-protein phosphatase 2A 55 kDa regulatory subunit B delta isoform |Homo sapiens	0	0	0	0	0	0	0	0	1	0	0	0	0	0	0	0	0	0	0	0	0	0	0	0	1453700	0	0	0	0	0	0	0
Q5VTR2	>Q5VTR2|BRE1A_HUMAN E3 ubiquitin-protein ligase BRE1A |Homo sapiens	3	2	3	2	3	3	3	2	3	3	4	3	3	2	2	0	6141100	2026780	1820670	1379960	4908450	3748100	2892150	1757800	3238170	2401210	1933250	959360	4040630	2413580	1215530	0
P05204	>P05204|HMGN2_HUMAN Non-histone chromosomal protein HMG-17 |Homo sapiens	1	1	1	1	0	0	0	0	1	1	1	1	0	0	0	1	2633200	1726000	1778100	1203000	0	0	0	0	1133200	1257900	956080	508850	0	0	0	860710
P52292;A8MYJ9	>P52292|IMA2_HUMAN Importin subunit alpha-2 |Homo sapiens;>A8MYJ9|IMA2L_HUMAN Importin subunit alpha-2-like protein |Homo sapiens	2	2	1	1	2	1	1	1	3	2	3	2	2	1	1	1	7658200	9433100	1911400	2792300	4211900	2683400	3074500	2546600	9751200	13033200	9907840	7238400	7879600	6512000	7912800	1945100
Q7Z589	>Q7Z589|EMSY_HUMAN Protein EMSY |Homo sapiens	0	2	3	3	0	1	1	1	0	2	3	3	0	2	0	1	0	1183460	8183910	4521070	0	765620	741360	481890	0	1261540	10234390	9494250	0	1118950	0	352880
Q7Z4H3	>Q7Z4H3|HDDC2_HUMAN HD domain-containing protein 2 |Homo sapiens	1	1	0	0	1	1	1	0	1	1	1	0	1	1	0	0	907360	551110	0	0	1005300	1402900	533590	0	909120	896130	671680	0	1252900	792160	0	0
P78345	>P78345|RPP38_HUMAN Ribonuclease P protein subunit p38 |Homo sapiens	1	0	1	2	0	1	1	2	0	0	1	2	0	0	1	2	567660	0	711940	3566210	0	1308800	1684600	6055100	0	0	1379200	3933380	0	0	722410	3674200
P49792;O14715;P0DJD1;P0DJD0;Q99666;A6NKT7	>P49792|RBP2_HUMAN E3 SUMO-protein ligase RanBP2 |Homo sapiens;>O14715|RGPD8_HUMAN RANBP2-like and GRIP domain-containing protein 8 |Homo sapiens;>P0DJD1|RGPD2_HUMAN RANBP2-like and GRIP domain-containing protein 2 |Homo sapiens;>P0DJD0|RGPD1_HUMAN RANBP2-	10	16	15	14	10	10	14	15	9	15	14	16	12	12	15	12	14255550	84076890	33372100	23513370	13858080	29758280	71039100	52880250	12168470	76296600	71969130	42638760	18803760	41038597	69240300	19265330
P49790	>P49790|NU153_HUMAN Nuclear pore complex protein Nup153 |Homo sapiens	36	60	65	53	33	62	62	47	22	63	73	56	33	56	59	54	52457770	294482470	216025060	85978930	35529390	283888290	266499260	115070670	22730200	227472830	519016540	131557920	41720250	236245700	256012740	77228520
Q6ZNG2	>Q6ZNG2|DBX2_HUMAN Homeobox protein DBX2 |Homo sapiens	0	0	0	0	0	1	0	0	0	0	0	0	0	0	0	0	0	0	0	0	0	4254600	0	0	0	0	0	0	0	0	0	0
Q6PD62	>Q6PD62|CTR9_HUMAN RNA polymerase-associated protein CTR9 homolog |Homo sapiens	4	3	0	1	4	1	2	2	6	4	0	2	4	3	1	1	8356550	8889270	0	1613600	16067650	783440	2195140	2964390	18489270	7440530	0	1814190	10372460	8401840	1394600	430560
Q9Y3B4	>Q9Y3B4|PM14_HUMAN Pre-mRNA branch site protein p14 |Homo sapiens	8	8	10	8	9	9	8	7	7	10	9	6	5	8	9	8	73546750	57488660	46952890	22568710	36442940	135344800	49565360	21972050	38804500	48064710	40390850	15101850	38123700	55530550	90160830	33245930
Q9BXJ9	>Q9BXJ9|NAA15_HUMAN N-alpha-acetyltransferase 15, NatA auxiliary subunit |Homo sapiens	6	7	1	6	10	3	4	6	11	6	2	6	9	6	4	4	3603990	8548170	1805000	5959140	18991160	3258960	5620380	6696470	17181340	4526540	3089530	7244650	13044390	4559200	8529590	8665450
O43719	>O43719|HTSF1_HUMAN HIV Tat-specific factor 1 |Homo sapiens	5	5	5	5	5	5	4	4	5	5	5	5	5	4	4	3	33533000	24380400	23358100	10326000	14425600	22262000	15407660	12358600	12876400	16195300	21582800	6647280	22315600	14728300	11157500	2714610
P07437;P68371;Q9BVA1;P04350;Q9BUF5	>P07437|TBB5_HUMAN Tubulin beta chain |Homo sapiens;>P68371|TBB4B_HUMAN Tubulin beta-4B chain |Homo sapiens;>Q9BVA1|TBB2B_HUMAN Tubulin beta-2B chain |Homo sapiens;>P04350|TBB4A_HUMAN Tubulin beta-4A chain |Homo sapiens;>Q9BUF5|TBB6_HUMAN Tubulin beta-6 ch	1	1	1	1	1	1	1	1	1	1	1	1	1	1	1	1	27296000	16873000	21701000	19413000	9582500	19543000	13215000	27815000	8454800	13193000	38066000	22788000	8872700	10246000	4819000	9942500
P30153	>P30153|2AAA_HUMAN Serine/threonine-protein phosphatase 2A 65 kDa regulatory subunit A alpha isoform |Homo sapiens	13	14	11	12	15	13	14	13	18	14	10	13	15	14	12	12	98575450	95011100	19802180	24603800	142591200	57086200	64442800	47584100	112512130	88295390	20815130	32324620	118458200	91446340	63141490	19507300
P52907;P47755	>P52907|CAZA1_HUMAN F-actin-capping protein subunit alpha-1 |Homo sapiens;>P47755|CAZA2_HUMAN F-actin-capping protein subunit alpha-2 |Homo sapiens	4	4	5	5	2	4	4	4	4	5	5	5	4	4	4	4	38763500	21646120	62934730	68560900	13766000	39438900	48020100	51259620	14181450	30696960	75489600	63077570	19709270	34187200	54855600	54572000
A6NKT7	>A6NKT7|RGPD3_HUMAN RanBP2-like and GRIP domain-containing protein 3 |Homo sapiens	0	1	1	1	1	1	1	1	1	1	1	1	1	1	1	1	0	5008800	312740	2224800	1934900	1202400	4747200	5621900	1213100	4267900	509030	4147700	1032200	3067900	4738700	2579300
Q9Y5B9	>Q9Y5B9|SP16H_HUMAN FACT complex subunit SPT16 |Homo sapiens	12	30	24	24	20	22	25	24	19	28	27	28	19	25	29	25	11491490	167082960	35646049	72699380	39549350	50746340	192104340	125669880	33790730	178684610	79392770	123823690	45286849	104930470	351664870	81444570
P49458	>P49458|SRP09_HUMAN Signal recognition particle 9 kDa protein |Homo sapiens	14	14	15	13	13	14	12	11	10	15	15	11	13	13	12	12	106841680	167140100	94269840	34855490	73286400	268025000	113426460	44495970	43762780	164629000	105995750	28894350	63251740	119135666	87994700	28344300
O60264	>O60264|SMCA5_HUMAN SWI/SNF-related matrix-associated actin-dependent regulator of chromatin subfamily A member 5 |Homo sapiens	6	5	0	1	6	0	4	4	9	4	0	4	6	4	1	2	3687200	5321100	0	2700000	8573960	0	1737760	3144810	17285340	2339480	0	1283780	10564748	3236750	983940	4043200
Q15528	>Q15528|MED22_HUMAN Mediator of RNA polymerase II transcription subunit 22 |Homo sapiens	0	2	2	2	1	2	1	2	0	0	1	2	0	0	0	2	0	1437685	1012470	3016300	645330	1616700	301320	2606780	0	0	259680	2189800	0	0	0	1816170
Q92616	>Q92616|GCN1L_HUMAN Translational activator GCN1 |Homo sapiens	11	13	3	8	13	1	5	9	19	12	1	11	15	10	7	6	13256490	24735050	4338440	9997620	41128180	546650	8541280	17917000	49701800	23618030	3949500	15897200	38105120	21064590	13030320	5645210
Q13618	>Q13618|CUL3_HUMAN Cullin-3 |Homo sapiens	11	14	1	7	13	4	10	11	12	13	0	9	12	11	9	7	13791750	31737080	442270	3699160	36183800	2053770	13873740	12459560	34133810	30896520	0	8467120	27051070	19685350	17847280	4939750
P68371;Q9BVA1;Q13885	>P68371|TBB4B_HUMAN Tubulin beta-4B chain |Homo sapiens;>Q9BVA1|TBB2B_HUMAN Tubulin beta-2B chain |Homo sapiens;>Q13885|TBB2A_HUMAN Tubulin beta-2A chain |Homo sapiens	2	1	3	2	2	1	3	2	2	1	2	2	1	1	1	3	68012300	77120000	106094600	112918400	74908600	98350000	143926290	148577000	46445500	57350000	180874000	113438980	54390000	88008000	65529000	61794500
Q8NBT2	>Q8NBT2|SPC24_HUMAN Kinetochore protein Spc24 |Homo sapiens	1	1	1	1	1	1	1	0	1	1	1	1	0	1	1	1	2211300	1880000	3952800	2865300	877700	2879600	3298100	0	1179500	2347600	2968600	3634700	0	2820700	2392800	2517200
Q14166	>Q14166|TTL12_HUMAN Tubulin--tyrosine ligase-like protein 12 |Homo sapiens	0	0	0	0	1	1	0	1	1	2	0	1	1	1	1	1	0	0	0	0	6395900	1923900	0	2846300	1594900	2952960	0	1302000	3117700	2702700	2906000	2121700
O00233	>O00233|PSMD9_HUMAN 26S proteasome non-ATPase regulatory subunit 9 |Homo sapiens	3	1	2	1	1	0	0	0	1	0	0	1	3	2	0	0	3909810	207410	802040	1370300	402700	0	0	0	922500	0	0	409750	2628720	1915870	0	0
P21333;O75369	>P21333|FLNA_HUMAN Filamin-A |Homo sapiens;>O75369|FLNB_HUMAN Filamin-B |Homo sapiens	2	2	2	2	2	2	1	2	2	2	2	2	2	2	1	2	11532100	10088400	7700800	6013700	7857400	11055800	573380	1678070	11101200	8286200	9876170	6273100	10063500	11292500	11309000	3335020
P83436	>P83436|COG7_HUMAN Conserved oligomeric Golgi complex subunit 7 |Homo sapiens	0	2	0	1	2	0	1	1	3	2	0	1	1	1	1	0	0	2267060	0	223080	943210	0	387470	471810	2437990	2873900	0	297200	974790	1235700	564570	0
P08238;Q58FF7	>P08238|HS90B_HUMAN Heat shock protein HSP 90-beta |Homo sapiens;>Q58FF7|H90B3_HUMAN Putative heat shock protein HSP 90-beta-3 |Homo sapiens	21	18	19	18	21	18	19	17	20	19	17	19	21	16	17	16	292864010	234617200	119344550	118075160	280980500	205779970	208306260	182720790	222996820	203348590	113594720	107467620	313371921	141028569	148994211	61162190
P62306	>P62306|RUXF_HUMAN Small nuclear ribonucleoprotein F |Homo sapiens	5	5	5	5	5	5	5	4	5	5	5	5	5	5	5	5	185653430	116951120	87785220	45674080	105428300	134873500	75676350	37295100	101052250	112084910	77811040	34248750	103064020	88640310	50228400	25288000
P51649	>P51649|SSDH_HUMAN Succinate-semialdehyde dehydrogenase, mitochondrial |Homo sapiens	5	5	0	0	5	2	1	1	5	3	1	1	5	4	1	1	8833160	7812450	0	0	10896070	3063700	361410	452420	7205990	3961040	463420	381800	10005520	4586300	952470	633930
P17844;Q92841	>P17844|DDX5_HUMAN Probable ATP-dependent RNA helicase DDX5 |Homo sapiens;>Q92841|DDX17_HUMAN Probable ATP-dependent RNA helicase DDX17 |Homo sapiens	4	4	4	3	3	4	4	4	4	4	4	4	4	2	2	3	9710550	6786600	5141010	3739390	3933700	14251400	12609100	11020340	4792310	6243570	5463470	3330810	11274590	6991570	6685300	5310730
Q99471	>Q99471|PFD5_HUMAN Prefoldin subunit 5 |Homo sapiens	3	3	3	2	2	1	1	1	2	2	1	1	2	2	3	0	8366600	3554260	1764080	712380	3279500	1172700	770030	502290	1965880	3405400	476320	697330	2781480	2015080	4207810	0
P10768	>P10768|ESTD_HUMAN S-formylglutathione hydrolase |Homo sapiens	12	9	9	7	12	8	9	8	9	9	10	10	12	12	7	5	69867100	35883870	21282360	8325210	52823960	55680900	31349390	19550200	32834630	31383950	25477150	21303660	58002670	43085500	23214760	10178420
Q3ZCM7;A6NNZ2;A6NKZ8;P07437;P68371;Q9BVA1;Q13885;P04350;Q9BUF5	>Q3ZCM7|TBB8_HUMAN Tubulin beta-8 chain |Homo sapiens;>A6NNZ2|TBB8B_HUMAN Tubulin beta-8 chain B |Homo sapiens;>A6NKZ8|YI016_HUMAN Putative tubulin beta chain-like protein ENSP00000290377 |Homo sapiens;>P07437|TBB5_HUMAN Tubulin beta chain |Homo sapiens;>P	4	3	4	4	4	4	4	4	3	4	3	4	3	4	4	4	262915800	405370900	422852100	526412500	270567600	448922000	588476300	748880400	162478140	237918500	471022000	480700800	245040200	395922900	520857000	505379000
Q53H96	>Q53H96|P5CR3_HUMAN Pyrroline-5-carboxylate reductase 3 |Homo sapiens	14	13	12	10	14	14	10	8	14	14	13	9	14	14	10	8	104034300	47531260	14099810	10695670	84479510	58443630	18864000	8485400	72783900	56189780	20101120	8676090	98554520	59558000	29727300	7283730
Q15751	>Q15751|HERC1_HUMAN Probable E3 ubiquitin-protein ligase HERC1 |Homo sapiens	1	1	1	1	1	1	1	1	2	1	1	1	1	1	1	1	24990000	11920000	13818000	11584000	14915000	28056000	13828000	14521000	6507000	6306600	11331000	5887900	8024500	11123000	14324000	14863000
P05091	>P05091|ALDH2_HUMAN Aldehyde dehydrogenase, mitochondrial |Homo sapiens	14	14	12	12	14	11	11	12	14	14	13	12	14	14	11	8	89277300	39459000	14606420	9370180	71850620	54256600	21518360	15002000	53814490	34623520	15463370	8600810	59462800	46669470	17068850	6550360
O43615	>O43615|TIM44_HUMAN Mitochondrial import inner membrane translocase subunit TIM44 |Homo sapiens	0	0	0	0	0	0	0	0	0	1	0	0	0	0	0	0	0	0	0	0	0	0	0	0	0	994780	0	0	0	0	0	0
P19784	>P19784|CSK22_HUMAN Casein kinase II subunit alpha |Homo sapiens	3	2	2	2	2	2	2	2	2	2	2	2	2	3	2	2	12065800	6789100	3785100	2914000	11951800	9740400	5657100	3443300	7838900	5154900	3269450	2851990	7519200	9232300	4919000	2543480
P49321	>P49321|NASP_HUMAN Nuclear autoantigenic sperm protein |Homo sapiens	8	7	6	3	6	5	5	5	7	8	7	5	7	6	5	4	38115920	17392850	11570160	4568760	16401290	16995700	10461600	9691670	14609830	20456950	16283750	8422470	24897650	17086990	10993600	3794290
P09429;B2RPK0;P26583	>P09429|HMGB1_HUMAN High mobility group protein B1 |Homo sapiens;>B2RPK0|HGB1A_HUMAN Putative high mobility group protein B1-like 1 |Homo sapiens;>P26583|HMGB2_HUMAN High mobility group protein B2 |Homo sapiens	3	3	3	3	3	3	3	3	3	3	3	3	3	3	3	3	38100500	18733400	21453500	14652500	22391300	24030500	26631200	24006400	20572400	19834200	22320400	14677800	14187600	16581800	13455900	8749500
P35250	>P35250|RFC2_HUMAN Replication factor C subunit 2 |Homo sapiens	4	4	3	3	5	3	4	3	4	3	3	3	3	3	3	3	12237870	11516570	2838560	4146900	25431400	7739600	10525600	7704300	8154160	6996000	3930620	3880060	13734100	10874200	5878300	3194060
O43488	>O43488|ARK72_HUMAN Aflatoxin B1 aldehyde reductase member 2 |Homo sapiens	1	1	1	1	1	1	1	0	0	0	0	0	0	1	1	1	235930	416650	566700	314840	672520	1766800	309730	0	0	0	0	0	0	599160	633270	708560
P37108	>P37108|SRP14_HUMAN Signal recognition particle 14 kDa protein |Homo sapiens	11	11	10	8	10	10	9	9	10	11	10	7	10	10	9	7	99825300	136735780	63481200	31466900	72666640	251413400	86317800	38983290	58508760	132088960	86782200	28414350	69619706	140333100	89597720	23946620
Q3ZCM7;A6NNZ2;A6NKZ8;Q9H4B7;P07437;P68371;CON__ENSEMBL:ENSBTAP00000025008;Q9BVA1;Q13885;P04350;Q9BUF5	>Q3ZCM7|TBB8_HUMAN Tubulin beta-8 chain |Homo sapiens;>A6NNZ2|TBB8B_HUMAN Tubulin beta-8 chain B |Homo sapiens;>A6NKZ8|YI016_HUMAN Putative tubulin beta chain-like protein ENSP00000290377 |Homo sapiens;>Q9H4B7|TBB1_HUMAN Tubulin beta-1 chain |Homo sapiens;	5	5	6	6	6	6	6	6	5	6	6	6	6	6	6	6	220026700	282562900	274179000	340808100	159189100	315510400	456038500	518675700	115593140	206674200	483392500	404159000	114632460	312143200	288649000	250476000
O00410	>O00410|IPO5_HUMAN Importin-5 |Homo sapiens	22	24	2	17	28	9	15	22	27	20	2	18	25	21	15	9	47344120	82181750	605660	20361170	142367350	5740280	28588020	57741480	111843020	49094470	763480	26098790	112685480	60992470	32993900	9889050
Q14683;Q8NDV3	>Q14683|SMC1A_HUMAN Structural maintenance of chromosomes protein 1A |Homo sapiens;>Q8NDV3|SMC1B_HUMAN Structural maintenance of chromosomes protein 1B |Homo sapiens	1	0	1	1	0	0	1	0	1	1	1	1	1	0	1	0	472080	0	86057	286270	0	0	586420	0	174710	272190	200810	201740	129330	0	7564.5	0
Q08AM6	>Q08AM6|VAC14_HUMAN Protein VAC14 homolog |Homo sapiens	1	4	0	5	0	1	7	7	1	3	0	7	1	2	6	6	298010	3430860	0	5977700	0	2044100	17374340	16527600	135400	2471390	0	9936803	381660	1587680	18381400	8864850
Q9NUG6	>Q9NUG6|PDRG1_HUMAN p53 and DNA damage-regulated protein 1 |Homo sapiens	3	4	3	3	4	4	3	3	4	4	4	4	4	4	3	3	17845700	13716200	8059700	6303730	12977100	17338100	11636300	6417200	11078180	14481100	12028190	6018560	14146050	13751960	10870100	4236520
Q01105	>Q01105|SET_HUMAN Protein SET |Homo sapiens	13	12	13	11	12	9	12	12	10	12	15	13	13	10	12	10	252482600	136263310	127916860	28084740	54591940	192787000	125559970	91464020	37296120	47705550	114411210	59473160	134605660	49485860	85310320	34188690
P62826	>P62826|RAN_HUMAN GTP-binding nuclear protein Ran |Homo sapiens	18	18	17	17	19	18	18	16	18	18	18	16	18	17	16	14	244732700	217107600	120457400	79889310	161148600	273471600	170129900	110714200	126413950	188505000	202064400	73082040	166947490	231280400	164258210	51568850
P46940;Q86VI3;Q13576	>P46940|IQGA1_HUMAN Ras GTPase-activating-like protein IQGAP1 |Homo sapiens;>Q86VI3|IQGA3_HUMAN Ras GTPase-activating-like protein IQGAP3 |Homo sapiens;>Q13576|IQGA2_HUMAN Ras GTPase-activating-like protein IQGAP2 |Homo sapiens	0	0	0	0	0	0	0	0	1	0	0	0	0	0	0	0	0	0	0	0	0	0	0	0	471470	0	0	0	0	0	0	0
Q9NVH2	>Q9NVH2|INT7_HUMAN Integrator complex subunit 7 |Homo sapiens	0	0	0	2	0	0	0	1	0	0	0	2	0	0	0	2	0	0	0	1671090	0	0	0	2141400	0	0	0	2332110	0	0	0	1626430
Q8IXW5	>Q8IXW5|RPAP2_HUMAN Putative RNA polymerase II subunit B1 CTD phosphatase RPAP2 |Homo sapiens	0	1	2	1	1	1	1	1	1	2	2	1	1	1	1	1	0	603680	548900	735550	218060	564630	1020600	886910	203490	745200	794970	594190	264550	388000	766080	669830
P18669;Q8N0Y7	>P18669|PGAM1_HUMAN Phosphoglycerate mutase 1 |Homo sapiens;>Q8N0Y7|PGAM4_HUMAN Probable phosphoglycerate mutase 4 |Homo sapiens	1	1	2	1	1	1	1	2	1	2	1	0	1	1	1	2	698940	478310	1011680	447950	800430	2625900	749000	1248560	73501	882150	413200	0	336040	694590	1361600	1780130
Q9NYB0	>Q9NYB0|TE2IP_HUMAN Telomeric repeat-binding factor 2-interacting protein 1 |Homo sapiens	1	1	1	1	1	1	0	0	1	0	1	0	1	1	0	0	1353600	838330	668260	579760	642530	1084900	0	0	274200	0	306870	0	661980	978610	0	0
Q8NFC6;Q96IK1	>Q8NFC6|BOD1L_HUMAN Biorientation of chromosomes in cell division protein 1-like |Homo sapiens;>Q96IK1|BOD1_HUMAN Biorientation of chromosomes in cell division protein 1 |Homo sapiens	3	3	2	1	2	2	2	2	2	3	3	2	3	3	1	1	6459720	6202720	2490630	570740	3154100	3239820	3217360	1636390	4795300	9584260	8586070	2345500	5631030	7268310	1944400	529490
P63151;Q66LE6;Q00005	>P63151|2ABA_HUMAN Serine/threonine-protein phosphatase 2A 55 kDa regulatory subunit B alpha isoform |Homo sapiens;>Q66LE6|2ABD_HUMAN Serine/threonine-protein phosphatase 2A 55 kDa regulatory subunit B delta isoform |Homo sapiens;>Q00005|2ABB_HUMAN Serine/	1	1	1	1	1	1	1	1	1	1	1	1	1	1	1	0	10595000	3684200	4315200	1371900	8230000	6060700	3558800	1727300	1905900	2177500	988640	895070	3660600	3093000	1201600	0
Q13409;O14576	>Q13409|DC1I2_HUMAN Cytoplasmic dynein 1 intermediate chain 2 |Homo sapiens;>O14576|DC1I1_HUMAN Cytoplasmic dynein 1 intermediate chain 1 |Homo sapiens	2	4	4	4	2	3	3	3	3	3	4	2	3	2	2	3	5352100	43231010	37318120	24131180	8721000	35713000	54147900	21610760	12379530	12751810	57310700	8431200	20992700	9667500	20088300	13523100
O14744	>O14744|ANM5_HUMAN Protein arginine N-methyltransferase 5 |Homo sapiens	2	34	30	34	10	27	37	36	8	32	30	35	11	29	37	35	1682450	355295970	113126060	261715560	9176180	123252770	690816800	455966790	6871340	251158850	190637280	361619460	7717300	220476400	743602700	233553920
CON__P60712;P60709;P63261;P68032;P68133;P62736;P63267	>P60712 SWISS-PROT:P60712 (Bos taurus) Actin, cytoplasmic 1;>P60709|ACTB_HUMAN Actin, cytoplasmic 1 |Homo sapiens;>P63261|ACTG_HUMAN Actin, cytoplasmic 2 |Homo sapiens;>P68032|ACTC_HUMAN Actin, alpha cardiac muscle 1 |Homo sapiens;>P68133|ACTS_HUMAN Actin,	15	17	17	20	22	19	19	18	15	15	17	20	15	16	22	23	531316020	429937470	328606570	550875280	451344100	630438200	710336880	930117290	393308830	523131920	728490380	799937060	575544040	675258830	698061580	696401300
P12268	>P12268|IMDH2_HUMAN Inosine-5-monophosphate dehydrogenase 2 |Homo sapiens	46	48	49	47	48	51	46	47	39	48	47	46	43	49	44	47	512189380	826849920	517360990	379181470	342219640	742173500	609514490	437266710	303006240	816664400	632720620	347398350	336815230	668962300	424548830	279174060
Q92599	>Q92599|SEPT8_HUMAN Septin-8 |Homo sapiens	3	3	3	2	5	3	3	1	2	2	3	2	3	3	2	3	22233400	3982480	2641410	1655220	11273170	6581000	2907130	1074300	9358700	3098000	2820190	1419130	14378600	6771900	2962400	1565480
P0C0S8;P20671;Q6FI13;Q16777;Q9BTM1;Q96KK5;Q99878	>P0C0S8|H2A1_HUMAN Histone H2A type 1 |Homo sapiens;>P20671|H2A1D_HUMAN Histone H2A type 1-D |Homo sapiens;>Q6FI13|H2A2A_HUMAN Histone H2A type 2-A |Homo sapiens;>Q16777|H2A2C_HUMAN Histone H2A type 2-C |Homo sapiens;>Q9BTM1|H2AJ_HUMAN Histone H2A.J |Homo	3	3	3	3	3	3	3	3	2	3	3	3	3	3	3	3	49390600	27588000	15702400	11708800	43483500	133635000	25830000	46728900	10626500	25853000	26877100	10387900	22748100	16317100	39133600	15780800
Q12768	>Q12768|STRUM_HUMAN WASH complex subunit strumpellin |Homo sapiens	6	8	0	3	8	2	3	4	9	8	2	4	8	7	4	4	6801280	14475520	0	1389900	22978340	7175800	2217350	3258410	18152820	11098300	1868800	2319860	17359830	13434820	4684490	3173380
P49792;O14715;Q99666	>P49792|RBP2_HUMAN E3 SUMO-protein ligase RanBP2 |Homo sapiens;>O14715|RGPD8_HUMAN RANBP2-like and GRIP domain-containing protein 8 |Homo sapiens;>Q99666|RGPD5_HUMAN RANBP2-like and GRIP domain-containing protein 5/6 |Homo sapiens	1	1	1	0	1	0	1	1	1	1	1	1	1	1	1	0	362090	10718000	959170	0	890410	0	3555300	6804400	1292400	7582000	994070	3642700	2598000	4447500	4415100	0
P55895	>P55895|RAG2_HUMAN V(D)J recombination-activating protein 2 |Homo sapiens	0	0	1	0	1	0	0	0	0	0	0	0	0	1	0	0	0	0	5883200	0	1301100	0	0	0	0	0	0	0	0	1538200	0	0
P40925	>P40925|MDHC_HUMAN Malate dehydrogenase, cytoplasmic |Homo sapiens	11	11	10	10	10	9	8	11	11	9	9	9	10	10	8	9	56161100	39247300	23435060	18495870	46031700	52072100	26825690	23505000	23797240	22547250	21711900	19983720	35057300	40884800	23294200	10228110
Q6SZW1	>Q6SZW1|SARM1_HUMAN Sterile alpha and TIR motif-containing protein 1 |Homo sapiens	0	0	2	3	0	0	3	3	0	0	2	4	0	0	2	2	0	0	833310	4480700	0	0	6258500	9824900	0	0	1269190	7200610	0	0	2270300	4665900
P00374	>P00374|DYR_HUMAN Dihydrofolate reductase |Homo sapiens	1	1	1	1	1	1	1	1	1	1	1	1	1	1	0	0	2474600	1256000	1303300	1371200	2080500	1923800	1577400	1825900	907440	1197600	1522000	1154700	936440	1674600	0	0
Q96C36	>Q96C36|P5CR2_HUMAN Pyrroline-5-carboxylate reductase 2 |Homo sapiens	15	15	10	10	14	14	9	5	15	15	12	8	15	15	14	10	143056060	89471270	13202340	9357650	132431400	82193500	23615470	12477750	150227980	118541320	26586130	14129170	167173840	156129740	38569960	9067040
Q8TAQ2;Q92922	>Q8TAQ2|SMRC2_HUMAN SWI/SNF complex subunit SMARCC2 |Homo sapiens;>Q92922|SMRC1_HUMAN SWI/SNF complex subunit SMARCC1 |Homo sapiens	13	11	14	14	12	12	13	14	12	12	14	13	12	11	13	13	43856250	41107640	168242600	149312540	25509340	40044130	194020000	305453200	30745520	45571730	252784700	160997200	33875570	27987610	93551190	118383240
Q9H0A0	>Q9H0A0|NAT10_HUMAN N-acetyltransferase 10 |Homo sapiens	2	2	0	1	3	0	2	2	3	3	0	2	3	3	3	1	2938200	5135600	0	1381200	11539900	0	2572970	1326000	7568300	5811530	0	2784500	9351100	4699420	4126610	376010
Q14192	>Q14192|FHL2_HUMAN Four and a half LIM domains protein 2 |Homo sapiens	2	4	7	6	1	6	5	4	1	3	7	6	2	3	4	6	1795300	6128010	23675370	9603640	774400	9626660	18153620	6880950	412710	4609200	24655730	10712440	1355270	6490800	8952500	7039440
Q15233;P23246	>Q15233|NONO_HUMAN Non-POU domain-containing octamer-binding protein |Homo sapiens;>P23246|SFPQ_HUMAN Splicing factor, proline- and glutamine-rich |Homo sapiens	2	2	2	2	1	2	2	1	2	2	2	1	2	2	2	2	16769600	12425500	7741530	7149130	1385000	18838100	13133700	7236200	7641170	10590600	9721600	5275100	13403380	15948900	11946800	3409200
P30837;P47895;O94788;P05091;P00352	>P30837|AL1B1_HUMAN Aldehyde dehydrogenase X, mitochondrial |Homo sapiens;>P47895|AL1A3_HUMAN Aldehyde dehydrogenase family 1 member A3 |Homo sapiens;>O94788|AL1A2_HUMAN Retinal dehydrogenase 2 |Homo sapiens;>P05091|ALDH2_HUMAN Aldehyde dehydrogenase, mito	0	0	0	0	0	0	0	0	1	0	0	0	0	0	0	0	0	0	0	0	0	0	0	0	4340800	0	0	0	0	0	0	0
P61158;Q9P1U1	>P61158|ARP3_HUMAN Actin-related protein 3 |Homo sapiens;>Q9P1U1|ARP3B_HUMAN Actin-related protein 3B |Homo sapiens	2	2	2	2	2	2	1	1	2	2	2	1	2	2	1	2	8189800	4665000	1974540	1676770	4965700	4165200	1485200	1056700	7364400	4536700	2183450	1123600	7925700	5149000	1373100	1065870
Q9NRL3	>Q9NRL3|STRN4_HUMAN Striatin-4 |Homo sapiens	8	8	8	7	8	9	9	4	8	9	9	8	7	8	7	4	11688340	30825090	19236510	12061120	8682181	38804820	20506470	5949940	6922300	42343520	35395950	8771900	9706640	29756630	15274616	2839700
Q9BUF5	>Q9BUF5|TBB6_HUMAN Tubulin beta-6 chain |Homo sapiens	7	7	6	6	2	4	7	5	3	7	7	7	5	6	5	7	10350350	10391880	10581000	12218630	2898500	16216800	20731800	16014700	1814190	16202160	17990180	15734900	5092190	10284440	10919700	15012120
Q9H9B1	>Q9H9B1|EHMT1_HUMAN Histone-lysine N-methyltransferase EHMT1 |Homo sapiens	0	0	2	2	2	2	1	2	0	1	1	1	0	1	1	1	0	0	646180	1151300	1821950	2609160	796880	2513640	0	746260	842620	193510	0	244710	252140	313540
Q99567	>Q99567|NUP88_HUMAN Nuclear pore complex protein Nup88 |Homo sapiens	9	6	5	2	10	6	4	2	10	8	2	4	10	6	1	0	22865670	9150650	2403450	837480	35405900	5160400	2794790	1384530	35481770	13020302	750270	1458960	34377860	11044370	1658400	0
P62333	>P62333|PRS10_HUMAN 26S protease regulatory subunit 10B |Homo sapiens	20	23	29	36	13	27	28	31	14	25	30	33	18	25	30	34	23487650	43442490	148656150	502609710	12564610	82289570	147748800	458692920	11548680	44460270	236529060	456090770	24633610	57674770	129321860	348466180
Q12840;O60282	>Q12840|KIF5A_HUMAN Kinesin heavy chain isoform 5A |Homo sapiens;>O60282|KIF5C_HUMAN Kinesin heavy chain isoform 5C |Homo sapiens	1	0	0	0	1	0	0	0	1	1	0	0	1	1	0	0	685850	0	0	0	620790	0	0	0	418700	403810	0	0	593970	476540	0	0
CON__P13645;P13645;CON__P02535-1;CON__Q7Z3Y7;CON__Q148H6;Q7Z3Y7;CON__Q7Z3Y8;Q7Z3Y8;CON__Q7Z3Z0;Q7Z3Z0;CON__Q7Z3Y9;Q7Z3Y9;CON__P02533;P02533;CON__P08779;P08779;CON__Q3ZAW8;CON__Q9Z2K1;CON__A2A4G1	>P13645 SWISS-PROT:P13645 Tax_Id=9606 Gene_Symbol=KRT10 Keratin, type I cytoskeletal 10;>P13645|K1C10_HUMAN Keratin, type I cytoskeletal 10 |Homo sapiens;>P02535-1 SWISS-PROT:P02535-1 Tax_Id=10090 Gene_Symbol=Krt10 Isoform 1 of Keratin, type I cytoskeletal	0	0	1	1	0	0	2	1	0	0	2	1	0	0	1	1	0	0	377610	6092800	0	0	35033000	17536000	0	0	16383730	12556000	0	0	2214300	1943700
P31946	>P31946|1433B_HUMAN 14-3-3 protein beta/alpha |Homo sapiens	7	7	6	7	7	7	6	7	6	7	6	7	7	7	7	7	43899020	26187460	21550920	20614080	22149030	39313700	24831890	20065880	17572320	19700560	16411070	15384400	22391430	19062920	18947940	11367430
Q5SW79	>Q5SW79|CE170_HUMAN Centrosomal protein of 170 kDa |Homo sapiens	5	4	3	3	4	1	1	3	3	4	5	4	3	4	1	4	4185590	2436190	1938530	2008760	2411420	1927500	1585200	1879920	1614570	2646830	3418730	2512450	3152070	2444220	1615700	2441730
O95163	>O95163|ELP1_HUMAN Elongator complex protein 1 |Homo sapiens	12	21	17	20	16	9	19	19	12	17	14	20	15	14	18	19	15313480	77820800	18427740	55608410	28451723	15723750	88066700	95028740	26802360	79295340	20552900	75464920	26699810	46207520	72087040	46396010
CON__ENSEMBL:ENSBTAP00000016242;P68363;P68366;Q71U36;Q9BQE3	>ENSEMBL:ENSBTAP00000016242 (Bos taurus) similar to alpha-tubulin I isoform 1;>P68363|TBA1B_HUMAN Tubulin alpha-1B chain |Homo sapiens;>P68366|TBA4A_HUMAN Tubulin alpha-4A chain |Homo sapiens;>Q71U36|TBA1A_HUMAN Tubulin alpha-1A chain |Homo sapiens;>Q9BQE3	4	4	4	4	4	3	4	4	2	4	4	4	4	4	4	4	54324600	78215600	39418350	62561540	24470000	38451500	60395600	121243300	35103000	97936200	136503600	92336500	51395800	75527800	48019900	45988300
P30566	>P30566|PUR8_HUMAN Adenylosuccinate lyase |Homo sapiens	34	37	19	26	36	25	28	31	37	35	14	24	36	31	26	18	273736310	278340790	19630270	52845990	635326690	73640590	102460180	114960350	518689990	238810520	13476210	54400910	433029380	227277500	122460270	34099670
Q9H0H5	>Q9H0H5|RGAP1_HUMAN Rac GTPase-activating protein 1 |Homo sapiens	3	2	1	1	2	2	1	0	2	3	1	1	3	3	0	0	2128330	1745550	418150	197450	1437420	1414650	372350	0	1704960	1818790	423430	211170	1256738	1915340	0	0
P49792;O14715;Q99666;A6NKT7	>P49792|RBP2_HUMAN E3 SUMO-protein ligase RanBP2 |Homo sapiens;>O14715|RGPD8_HUMAN RANBP2-like and GRIP domain-containing protein 8 |Homo sapiens;>Q99666|RGPD5_HUMAN RANBP2-like and GRIP domain-containing protein 5/6 |Homo sapiens;>A6NKT7|RGPD3_HUMAN RanBP	1	4	1	4	3	3	4	4	1	3	0	4	2	3	4	3	716690	15828940	451920	4528900	2357000	2142470	10254260	8773950	514680	7625000	0	7119680	1627270	4600640	11167200	4583110
Q96JB2	>Q96JB2|COG3_HUMAN Conserved oligomeric Golgi complex subunit 3 |Homo sapiens	1	3	1	0	3	0	1	3	4	4	0	0	3	3	2	2	489970	6589650	314530	0	3835640	0	855930	2497180	6756200	10941810	0	0	4618860	4094950	2722710	656090
Q4LE39;P29374	>Q4LE39|ARI4B_HUMAN AT-rich interactive domain-containing protein 4B |Homo sapiens;>P29374|ARI4A_HUMAN AT-rich interactive domain-containing protein 4A |Homo sapiens	1	1	1	0	0	1	0	0	0	1	1	1	0	1	1	0	267690	527470	459740	0	0	512860	0	0	0	512140	731380	257670	0	483260	420640	0
Q6ZN18	>Q6ZN18|AEBP2_HUMAN Zinc finger protein AEBP2 |Homo sapiens	1	0	1	1	0	0	1	1	1	1	0	1	1	0	0	1	3395800	0	763560	344390	0	0	881760	399880	1405700	1230300	0	382500	2001000	0	0	308100
Q01804	>Q01804|OTUD4_HUMAN OTU domain-containing protein 4 |Homo sapiens	1	0	1	0	1	0	0	0	1	0	0	0	1	0	0	0	327840	0	231740	0	486320	0	0	0	356280	0	0	0	397270	0	0	0
P60842	>P60842|IF4A1_HUMAN Eukaryotic initiation factor 4A-I |Homo sapiens	12	14	14	14	14	14	14	14	15	13	13	14	13	14	12	11	115413600	107551140	47256430	58245540	104485300	76383900	86486700	88748800	94577810	46181980	28276160	50847430	99869550	116939730	73008200	30048060
P07437;Q9BVA1;Q13885	>P07437|TBB5_HUMAN Tubulin beta chain |Homo sapiens;>Q9BVA1|TBB2B_HUMAN Tubulin beta-2B chain |Homo sapiens;>Q13885|TBB2A_HUMAN Tubulin beta-2A chain |Homo sapiens	2	2	2	2	2	2	2	2	2	2	2	2	2	2	2	2	172734800	417427300	420030500	619301000	235733000	499877000	553046000	647800000	139079400	288950300	489795000	515454000	151297800	355721500	411759000	477290000
Q86YJ6	>Q86YJ6|THNS2_HUMAN Threonine synthase-like 2 |Homo sapiens	1	1	1	1	0	0	1	1	1	1	1	0	1	1	1	1	1185600	682810	312720	397920	0	0	1034900	644040	496890	328520	348320	0	505170	562520	520210	464630
Q8WUW1	>Q8WUW1|BRK1_HUMAN Protein BRICK1 |Homo sapiens	5	4	3	2	6	5	1	1	4	4	3	1	4	5	1	1	24609810	9374300	3750140	1166660	12752840	15015180	2298100	1011900	13286500	11353300	3604460	548790	14001600	13155580	3842900	1648300
P00492	>P00492|HPRT_HUMAN Hypoxanthine-guanine phosphoribosyltransferase |Homo sapiens	9	9	8	6	9	9	4	5	8	9	7	7	9	9	8	4	35310370	20729740	9210480	8104580	22975870	20373450	8627510	9096520	18734250	19107560	9103340	6265270	29787060	29771870	15293120	4290060
O00203	>O00203|AP3B1_HUMAN AP-3 complex subunit beta-1 |Homo sapiens	0	1	0	0	1	0	1	1	1	1	0	1	1	1	0	0	0	2194200	0	0	10500000	0	3101500	3191700	3106100	2310000	0	737760	3199700	2828400	0	0
Q9C0C2	>Q9C0C2|TB182_HUMAN 182 kDa tankyrase-1-binding protein |Homo sapiens	23	46	56	48	23	43	48	45	14	38	54	49	15	37	42	44	20637250	91411650	198452740	135025290	19735850	118018200	239081330	163672250	6742416	68455380	298372560	162348060	11301290	71533750	166596550	135555360
O95071	>O95071|UBR5_HUMAN E3 ubiquitin-protein ligase UBR5 |Homo sapiens	0	0	0	1	1	0	0	1	0	0	0	1	1	1	0	0	0	0	0	290230	257000	0	0	1248600	0	0	0	690570	522620	175240	0	0
P18669;P15259;Q8N0Y7	>P18669|PGAM1_HUMAN Phosphoglycerate mutase 1 |Homo sapiens;>P15259|PGAM2_HUMAN Phosphoglycerate mutase 2 |Homo sapiens;>Q8N0Y7|PGAM4_HUMAN Probable phosphoglycerate mutase 4 |Homo sapiens	3	2	2	3	3	3	3	3	2	2	3	2	3	3	3	2	30184290	19578800	15836900	14662830	29634300	48594500	27021480	15812900	13857600	20428800	15659940	13412200	20803110	28926100	23942380	12215100
Q15637	>Q15637|SF01_HUMAN Splicing factor 1 |Homo sapiens	2	1	3	2	2	1	2	2	2	1	2	2	2	2	1	2	3389640	1459600	2151530	1366900	2251280	2481500	2349100	1944370	2549600	1097400	1914900	1125160	3602132	3429400	1432600	982760
O43172	>O43172|PRP4_HUMAN U4/U6 small nuclear ribonucleoprotein Prp4 |Homo sapiens	14	13	13	12	11	14	12	12	9	11	14	9	12	11	12	12	52752170	41287020	35982290	17177210	26934090	42202780	43569700	23619100	20918470	30661310	41088550	13340140	28641750	28473620	29126570	11374650
Q16576	>Q16576|RBBP7_HUMAN Histone-binding protein RBBP7 |Homo sapiens	24	24	26	22	22	27	27	26	20	25	25	23	21	24	23	19	355423380	720153900	640863040	225109300	219216960	606323800	665267390	242769400	206735800	610191190	859265430	247972760	226321610	545735620	324930600	120768000
P02794	>P02794|FRIH_HUMAN Ferritin heavy chain |Homo sapiens	0	0	2	3	0	0	1	3	0	0	1	3	0	0	0	2	0	0	2303520	7045000	0	0	1368000	10106030	0	0	1318400	5732930	0	0	0	1058820
Q7L5D6	>Q7L5D6|GET4_HUMAN Golgi to ER traffic protein 4 homolog |Homo sapiens	3	3	3	3	2	3	3	3	3	3	3	3	3	3	2	3	3105130	7846900	2539850	6487300	5935500	5939500	11779300	12196100	4972380	6882000	2486680	7201200	4072490	5528000	8753200	4902390
Q9BZH6	>Q9BZH6|WDR11_HUMAN WD repeat-containing protein 11 |Homo sapiens	0	11	0	7	11	4	5	4	8	11	1	9	10	11	8	2	0	37429770	0	4287100	20414770	2582760	7590300	5695370	17101470	40295310	551670	8708100	18116500	30676650	19009040	1616190
P61981	>P61981|1433G_HUMAN 14-3-3 protein gamma |Homo sapiens	6	4	6	6	6	6	5	5	6	4	4	5	5	4	5	6	12656730	7860580	9576170	10799300	15068590	34715100	17106800	10257170	7317150	8411830	5775870	7080850	4522420	11598700	20194270	14244180
Q4VC05;Q9BQE9;Q8WUZ0	>Q4VC05|BCL7A_HUMAN B-cell CLL/lymphoma 7 protein family member A |Homo sapiens;>Q9BQE9|BCL7B_HUMAN B-cell CLL/lymphoma 7 protein family member B |Homo sapiens;>Q8WUZ0|BCL7C_HUMAN B-cell CLL/lymphoma 7 protein family member C |Homo sapiens	1	1	1	1	1	1	1	1	0	1	1	1	1	1	1	1	3706600	3754400	16566000	15258000	1221700	3471300	8226000	9465100	0	3006800	25673000	16359000	2250400	2885600	12726000	9152900
CON__ENSEMBL:ENSBTAP00000016242;P68363;P68366	>ENSEMBL:ENSBTAP00000016242 (Bos taurus) similar to alpha-tubulin I isoform 1;>P68363|TBA1B_HUMAN Tubulin alpha-1B chain |Homo sapiens;>P68366|TBA4A_HUMAN Tubulin alpha-4A chain |Homo sapiens	6	6	6	6	6	6	6	6	6	6	6	6	6	6	6	6	200003400	381693200	389319700	510122000	152153400	283434800	554816000	623170000	155000900	328217700	698871000	552577200	192931400	283652600	255088700	251820700
P25786	>P25786|PSA1_HUMAN Proteasome subunit alpha type-1 |Homo sapiens	18	19	19	28	19	23	12	23	15	16	20	27	17	15	15	28	51809430	45694930	16712530	216798940	28955037	61688190	28533810	164783080	26894390	28394170	30835910	343435400	37291920	29575290	27711201	209023070
O75607	>O75607|NPM3_HUMAN Nucleoplasmin-3 |Homo sapiens	4	4	4	2	5	4	3	2	2	3	4	2	4	4	3	2	22969730	13544330	14282560	10425700	19826970	26201000	12734700	8741200	11070500	12904650	8697540	8782100	19042070	15756830	12298340	6692520
P07910;O60812	>P07910|HNRPC_HUMAN Heterogeneous nuclear ribonucleoproteins C1/C2 |Homo sapiens;>O60812|HNRCL_HUMAN Heterogeneous nuclear ribonucleoprotein C-like 1 |Homo sapiens	1	1	1	1	1	1	1	1	1	1	1	1	1	1	1	1	1615600	1415300	1591900	1162700	1557600	3008200	2396700	1359000	1005100	1466100	1720100	1245800	1415400	1578900	2382200	1772000
Q13162	>Q13162|PRDX4_HUMAN Peroxiredoxin-4 |Homo sapiens	23	21	22	18	22	24	20	17	22	22	23	20	23	23	19	19	1016585800	517988900	253449390	119509470	699206600	777131610	277512450	142267170	606287300	522601340	233960270	128039470	709907100	549025100	245985600	132226600
Q92804	>Q92804|RBP56_HUMAN TATA-binding protein-associated factor 2N |Homo sapiens	2	0	1	2	3	0	2	2	1	0	0	1	1	1	2	1	629270	0	806350	991280	4397730	0	20966100	31544000	205740	0	0	322080	173820	630870	4732700	803290
P52948	>P52948|NUP98_HUMAN Nuclear pore complex protein Nup98-Nup96 |Homo sapiens	4	14	4	10	6	7	12	11	8	11	6	13	7	13	12	10	11502160	34157150	2175620	15837070	10701680	31653950	56834610	30731190	5964062	25535400	3156590	24241760	15184440	64649550	39068630	18829470
P16152;O75828	>P16152|CBR1_HUMAN Carbonyl reductase [NADPH] 1 |Homo sapiens;>O75828|CBR3_HUMAN Carbonyl reductase [NADPH] 3 |Homo sapiens	2	2	1	2	2	2	1	1	2	2	1	2	2	2	2	2	3177560	1994050	266890	1728330	2816680	3255000	921740	503800	1386650	1492880	540200	973220	2667340	2529390	2053670	1336780
Q8TDP1	>Q8TDP1|RNH2C_HUMAN Ribonuclease H2 subunit C |Homo sapiens	1	2	2	2	1	2	2	2	0	2	2	2	1	2	2	1	1549300	4841000	4980500	6295440	1514100	4136800	2689760	1678120	0	3476740	7335310	9372630	1106900	3857400	23107200	11183000
Q58WW2	>Q58WW2|DCAF6_HUMAN DDB1- and CUL4-associated factor 6 |Homo sapiens	2	1	0	1	1	1	0	0	1	1	0	0	1	1	0	0	1511370	416010	0	355550	858500	635960	0	0	700930	591400	0	0	679250	437610	0	0
Q9UPN7	>Q9UPN7|PP6R1_HUMAN Serine/threonine-protein phosphatase 6 regulatory subunit 1 |Homo sapiens	2	5	2	1	5	4	2	3	3	4	2	2	4	5	3	1	2155000	16245040	1219270	715540	10713080	3161560	5710200	7899000	6434810	10363340	1117500	1925460	6344680	13134850	1950760	600410
Q9H900	>Q9H900|ZWILC_HUMAN Protein zwilch homolog |Homo sapiens	1	4	4	4	0	2	5	5	3	4	4	4	4	4	4	4	190980	5241200	2606520	6824200	0	806010	14738990	12207510	1367840	5638270	4516660	10415900	1925420	3995840	12242100	6359400
Q8WUA4	>Q8WUA4|TF3C2_HUMAN General transcription factor 3C polypeptide 2 |Homo sapiens	6	10	10	7	6	10	9	9	5	10	10	9	5	10	10	7	5400680	40553710	15332000	11733920	6979820	25408520	26980960	19059940	3433520	33824820	27617680	14352950	8782650	36960940	22639770	11714960
Q14697	>Q14697|GANAB_HUMAN Neutral alpha-glucosidase AB |Homo sapiens	32	31	29	28	32	30	28	26	32	31	29	26	32	29	25	26	264469180	202956080	53932200	53919390	301007030	141233030	98439840	101790070	233585940	165110420	54090200	58956880	325450650	199508390	164555800	51745030
P10644	>P10644|KAP0_HUMAN cAMP-dependent protein kinase type I-alpha regulatory subunit |Homo sapiens	10	12	13	13	9	11	11	12	8	11	13	13	9	10	14	13	16447270	39562200	72263800	56829320	10292410	35277170	71535200	57773900	8209710	32895720	119065900	72701510	9384840	34057170	80493810	53550800
Q8N3C0	>Q8N3C0|HELC1_HUMAN Activating signal cointegrator 1 complex subunit 3 |Homo sapiens	3	4	2	2	4	0	2	2	6	5	0	3	5	5	2	1	2809840	5283050	690370	933570	6906080	0	1769530	2346700	11185450	8472320	0	1952460	9400380	6819120	1026440	282800
P62877	>P62877|RBX1_HUMAN E3 ubiquitin-protein ligase RBX1 |Homo sapiens	2	2	2	2	2	2	2	2	2	2	2	2	2	2	2	1	10515900	4080800	1802960	865060	6176200	3202270	3565660	839690	5313100	4311200	1507580	767830	5474300	5068400	2131800	159940
P07437	>P07437|TBB5_HUMAN Tubulin beta chain |Homo sapiens	16	16	17	18	15	18	17	17	15	16	16	17	16	15	18	18	577123210	1230128700	1341726000	1771856700	633999500	1209618200	1373651600	1761183300	498621800	1073784700	2008907100	1863711290	552470070	1073505900	1190534200	1007012000
P51157	>P51157|RAB28_HUMAN Ras-related protein Rab-28 |Homo sapiens	0	0	0	0	1	0	0	0	0	0	0	0	1	1	0	0	0	0	0	0	16027000	0	0	0	0	0	0	0	23886000	34396000	0	0
P26358	>P26358|DNMT1_HUMAN DNA (cytosine-5)-methyltransferase 1 |Homo sapiens	6	6	4	5	7	2	2	3	9	4	2	3	6	4	2	1	4528350	5378360	1649800	2728600	10804140	1051440	1189990	2003280	7385040	1724170	615120	1026780	7867640	2972160	1075490	361410
P07437;P68371	>P07437|TBB5_HUMAN Tubulin beta chain |Homo sapiens;>P68371|TBB4B_HUMAN Tubulin beta-4B chain |Homo sapiens	1	2	2	3	1	4	4	4	1	1	2	3	2	1	3	3	32645000	72878000	83854000	206721800	34923000	129507960	146746600	257153500	19648000	26241000	114979800	119128960	97397000	53875000	117868540	118633550
P28340	>P28340|DPOD1_HUMAN DNA polymerase delta catalytic subunit |Homo sapiens	4	4	2	4	5	2	3	4	4	4	1	4	4	4	1	1	4326380	8332360	1916390	6336850	7823610	9086570	7314940	12841830	8758720	7412410	2821200	4454930	8093920	9327070	1323600	3551700
Q29RF7	>Q29RF7|PDS5A_HUMAN Sister chromatid cohesion protein PDS5 homolog A |Homo sapiens	0	0	0	0	0	0	0	0	0	0	0	0	0	0	0	0	0	0	0	0	0	0	0	0	0	0	0	0	0	0	0	0
Q6UXN9	>Q6UXN9|WDR82_HUMAN WD repeat-containing protein 82 |Homo sapiens	3	2	3	2	3	3	3	1	3	3	3	2	3	3	2	2	4588400	3676900	2690330	1541320	4429190	7996000	5826820	1624500	2527750	3227100	4456000	1320630	2415420	2657120	2919300	1782540
O14617	>O14617|AP3D1_HUMAN AP-3 complex subunit delta-1 |Homo sapiens	1	1	0	1	1	0	1	1	2	1	0	1	1	1	1	1	736360	1677500	0	1118800	1247300	0	1186400	1569300	4877800	2229900	0	791080	1748200	778350	890770	248970
Q8IYB3	>Q8IYB3|SRRM1_HUMAN Serine/arginine repetitive matrix protein 1 |Homo sapiens	1	1	1	0	1	2	1	1	0	1	1	1	1	1	0	1	2727100	1237400	833860	0	1120200	5156900	1655000	1016800	0	653360	610190	546690	925820	947060	0	309250
P49411	>P49411|EFTU_HUMAN Elongation factor Tu, mitochondrial |Homo sapiens	22	21	20	16	23	24	19	15	15	17	19	18	22	19	17	17	166935100	86013730	61752370	38530250	104598720	146276790	63069390	38116640	71278450	61278810	56866870	38554940	128805750	109540750	69026730	30942850
Q14141	>Q14141|SEPT6_HUMAN Septin-6 |Homo sapiens	3	3	2	1	3	3	2	2	3	3	2	2	3	3	2	2	16657400	6722460	3894600	600810	15873500	10130910	5724900	4509000	10723600	7691380	3323310	2264270	11905740	8098700	4714100	1942490
REV__Q9NRW7	>Q9NRW7|VPS45_HUMAN Vacuolar protein sorting-associated protein 45 |Homo sapiens	0	0	0	0	0	1	1	0	0	0	0	0	1	1	1	1	0	0	0	0	0	610850	978420	0	0	0	0	0	2467700	1913900	448390	1148000
Q92973;O14787	>Q92973|TNPO1_HUMAN Transportin-1 |Homo sapiens;>O14787|TNPO2_HUMAN Transportin-2 |Homo sapiens	2	2	1	2	1	1	2	2	2	2	0	1	2	1	2	2	2153690	6748200	506160	4483660	3612800	1141200	6117900	9131500	3903030	3066600	0	1082800	3929940	3593500	9577100	5334100
P49589	>P49589|SYCC_HUMAN Cysteine--tRNA ligase, cytoplasmic |Homo sapiens	8	7	6	6	8	5	5	5	8	7	7	6	8	6	5	4	25522920	22900570	4125430	8622290	32164360	7217130	16669380	6387260	27276750	23805360	9489230	5234410	38285210	20049050	11607360	6905770
Q9H0B6	>Q9H0B6|KLC2_HUMAN Kinesin light chain 2 |Homo sapiens	1	1	1	0	1	1	0	0	1	0	1	0	1	0	1	0	771250	304130	309540	0	802200	907930	0	0	797670	0	356490	0	687010	0	260760	0
P06132	>P06132|DCUP_HUMAN Uroporphyrinogen decarboxylase |Homo sapiens	1	1	1	0	0	0	1	1	1	1	1	0	1	1	0	0	1200600	718790	563450	0	0	0	1155100	557950	492520	392580	554240	0	841620	726810	0	0
P19387	>P19387|RPB3_HUMAN DNA-directed RNA polymerase II subunit RPB3 |Homo sapiens	12	15	17	17	11	17	16	18	12	14	18	15	11	13	14	18	23043700	78646942	176060810	101912500	16205559	105862770	208527300	113957260	13688260	56514490	252143200	85468420	15760019	63247050	121853500	106688950
O96019;O94805	>O96019|ACL6A_HUMAN Actin-like protein 6A |Homo sapiens;>O94805|ACL6B_HUMAN Actin-like protein 6B |Homo sapiens	0	1	2	1	0	0	1	1	0	1	2	2	1	0	1	2	0	517930	5798300	3950900	0	0	5237800	2251400	0	578730	7510900	5870200	285780	0	2523800	3422330
O95639;A6NMK7	>O95639|CPSF4_HUMAN Cleavage and polyadenylation specificity factor subunit 4 |Homo sapiens;>A6NMK7|CPS4L_HUMAN Putative cleavage and polyadenylation specificity factor subunit 4-like protein |Homo sapiens	1	1	1	1	1	1	1	1	1	1	1	1	1	1	1	1	818710	3190700	2755400	1013200	846430	4665600	3665000	1542100	329000	2745300	3898700	936820	534720	3122100	2134400	559600
Q14202	>Q14202|ZMYM3_HUMAN Zinc finger MYM-type protein 3 |Homo sapiens	2	3	1	1	4	0	1	2	4	3	0	1	4	3	1	1	1248220	6623940	542560	6103500	4200750	0	10473000	14227040	3088630	5490340	0	7574500	3283410	2296370	3347600	1683500
P30520	>P30520|PURA2_HUMAN Adenylosuccinate synthetase isozyme 2 |Homo sapiens	9	9	9	7	9	9	7	6	9	9	9	8	9	9	8	6	34142000	18525770	11210910	8938030	30210100	30382600	16267800	10039800	19171170	16124350	11459450	7869100	22329240	20495210	11073160	6419030
O60645	>O60645|EXOC3_HUMAN Exocyst complex component 3 |Homo sapiens	2	5	2	2	5	2	4	3	5	5	1	3	5	5	5	4	2660580	20502320	1298530	4067520	13417070	2793030	6304040	7903050	16564200	28645800	697870	5971260	10665490	21052130	15677280	3701240
Q9Y230	>Q9Y230|RUVB2_HUMAN RuvB-like 2 |Homo sapiens	70	75	79	83	75	83	78	79	65	74	79	77	77	73	80	82	816244060	1890355180	2009867950	1707175370	577819460	2027688680	2365051980	1897220460	784724620	1699575270	2181010180	1313458300	839100070	1443369970	1683094630	1215223070
P17844	>P17844|DDX5_HUMAN Probable ATP-dependent RNA helicase DDX5 |Homo sapiens	16	17	15	14	17	19	16	14	15	15	17	14	16	17	16	17	62823670	46564140	34769080	29453350	46018770	74269820	44576010	44353500	41820010	41606330	44229450	27192700	61748510	57228210	46405800	22126130
Q9Y5V3	>Q9Y5V3|MAGD1_HUMAN Melanoma-associated antigen D1 |Homo sapiens	0	0	1	0	0	0	1	1	0	1	2	1	0	0	1	1	0	0	381140	0	0	0	400650	1332600	0	307420	1521540	612610	0	0	1744400	241870
Q9NX08	>Q9NX08|COMD8_HUMAN COMM domain-containing protein 8 |Homo sapiens	3	4	4	3	3	3	4	3	3	4	3	2	3	4	3	1	12375700	19609900	6738180	3288090	7895600	21356800	10951700	4061410	8479670	25687300	9642400	3144030	9374200	19159300	8023300	410160
CON__P02754	>P02754 SWISS-PROT:P02754 Beta-lactoglobulin - Bos taurus (Bovine).	2	1	1	1	1	2	6	2	1	1	1	2	6	1	1	1	2269800	871780	532480	683980	862670	1514350	97392100	7033510	703670	693990	993320	937780	30290960	1299600	8848000	791240
P55884	>P55884|EIF3B_HUMAN Eukaryotic translation initiation factor 3 subunit B |Homo sapiens	33	69	82	84	16	74	87	81	26	62	85	80	23	65	88	79	29177440	558673171	1394443140	1027194750	15781130	547988780	2537642590	1398744690	18640315	369262630	2519734150	1230146430	19135648	450034360	2205112678	1017901830
P26583	>P26583|HMGB2_HUMAN High mobility group protein B2 |Homo sapiens	8	6	7	7	8	7	8	8	8	6	8	6	8	5	6	8	93763420	68832990	47993720	54980150	58262380	55286050	113285000	123084200	48737520	56419420	67128280	70530440	62354045	63013480	43352394	33330670
P23528;Q9Y281	>P23528|COF1_HUMAN Cofilin-1 |Homo sapiens;>Q9Y281|COF2_HUMAN Cofilin-2 |Homo sapiens	4	4	4	4	4	4	4	3	4	4	4	4	4	4	4	4	71220600	37129900	33153200	32094400	42735700	58635200	34563200	26824300	36232000	38383100	40671800	24623200	55026600	52871400	36605100	16648630
Q8TAG9	>Q8TAG9|EXOC6_HUMAN Exocyst complex component 6 |Homo sapiens	1	2	0	1	3	0	1	1	2	2	0	1	2	0	1	1	346770	1007930	0	240960	2310720	0	240550	376730	1193990	1181030	0	321180	701320	0	761380	494680
Q9GZS1	>Q9GZS1|RPA49_HUMAN DNA-directed RNA polymerase I subunit RPA49 |Homo sapiens	2	6	5	4	4	5	6	6	4	6	5	5	4	5	6	5	1585060	25032700	5562730	7064780	2398540	8405910	16888730	17883160	3755200	22592750	7639030	11119100	3316660	15502700	29029100	7468230
Q9BRP4	>Q9BRP4|PAAF1_HUMAN Proteasomal ATPase-associated factor 1 |Homo sapiens	4	6	4	5	6	4	3	6	3	4	6	6	4	4	6	5	4228590	7370190	6829370	9111670	4741920	5799090	9794700	10534570	1711540	4883860	11035080	8688431	4775560	6624350	14458160	10667460
Q15291	>Q15291|RBBP5_HUMAN Retinoblastoma-binding protein 5 |Homo sapiens	8	8	7	6	8	8	8	8	9	8	8	7	8	8	7	5	12362930	25497200	10986140	7005740	10803780	26740650	18571980	10510260	10250600	21115100	23848470	9457190	10862320	21302590	23934910	8019920
Q07866;Q9H0B6	>Q07866|KLC1_HUMAN Kinesin light chain 1 |Homo sapiens;>Q9H0B6|KLC2_HUMAN Kinesin light chain 2 |Homo sapiens	1	1	1	0	0	1	1	0	0	0	0	1	1	0	1	0	765140	483040	372040	0	0	1660500	1081500	0	0	0	0	658330	31093	0	266310	0
P58107	>P58107|EPIPL_HUMAN Epiplakin |Homo sapiens	1	3	1	1	3	1	2	0	4	3	1	0	3	2	1	0	1100100	6268490	334060	631460	4078390	801870	1045130	0	9066610	8210230	412760	0	3723600	4076570	438070	0
P40937	>P40937|RFC5_HUMAN Replication factor C subunit 5 |Homo sapiens	1	1	0	1	1	1	1	1	1	1	0	1	1	1	1	1	602380	879400	0	702120	2419300	271880	1342300	1157200	1610900	1281700	0	617140	2245400	978790	1454500	707500
P04075	>P04075|ALDOA_HUMAN Fructose-bisphosphate aldolase A |Homo sapiens	59	58	58	57	60	62	57	56	58	57	58	54	60	58	57	57	4552228180	2151546560	1403634140	1036011100	3079701940	3002705030	1635980700	1059890850	2437288030	1758962380	1263655950	752271410	3322728549	2290329290	1266401350	602548910
Q5H9R7	>Q5H9R7|PP6R3_HUMAN Serine/threonine-protein phosphatase 6 regulatory subunit 3 |Homo sapiens	2	1	0	1	2	1	0	1	2	2	1	2	2	1	2	0	2564900	4283400	0	1042900	3865820	1089000	0	3980200	7568900	7923600	224060	2375800	10415200	4049000	6604200	0
P21281;P15313	>P21281|VATB2_HUMAN V-type proton ATPase subunit B, brain isoform |Homo sapiens;>P15313|VATB1_HUMAN V-type proton ATPase subunit B, kidney isoform |Homo sapiens	10	11	10	10	10	10	11	9	10	10	11	11	9	10	10	8	34785170	93792800	37017500	16866410	26501727	72325700	68815330	28179200	25104440	89020800	47479560	14913680	28540110	85398600	30163727	13156210
P35579;P35580	>P35579|MYH9_HUMAN Myosin-9 |Homo sapiens;>P35580|MYH10_HUMAN Myosin-10 |Homo sapiens	3	4	1	5	5	3	5	5	3	4	1	5	3	4	5	5	2102580	8536250	1339400	20065610	14935680	4904610	14203930	35207700	5017300	5040600	981610	29167200	2830160	7013180	16739700	22843350
Q9BVA1;Q13885;Q9BUF5	>Q9BVA1|TBB2B_HUMAN Tubulin beta-2B chain |Homo sapiens;>Q13885|TBB2A_HUMAN Tubulin beta-2A chain |Homo sapiens;>Q9BUF5|TBB6_HUMAN Tubulin beta-6 chain |Homo sapiens	1	1	1	1	1	1	1	1	1	1	1	1	1	1	1	1	3361900	3470800	3404100	4000800	2618100	5698500	7348500	7747400	2014600	3537300	6008500	4319100	2764300	3399800	4912600	2740600
P07900;P08238;Q58FF7	>P07900|HS90A_HUMAN Heat shock protein HSP 90-alpha |Homo sapiens;>P08238|HS90B_HUMAN Heat shock protein HSP 90-beta |Homo sapiens;>Q58FF7|H90B3_HUMAN Putative heat shock protein HSP 90-beta-3 |Homo sapiens	7	5	5	6	7	7	6	6	7	6	5	6	6	6	6	6	347482870	183251000	144310700	103748600	353927280	304200490	218867300	157933810	275237330	161921350	98216200	94735400	267230620	232605510	205317500	116200400
Q3SYG4	>Q3SYG4|PTHB1_HUMAN Protein PTHB1 |Homo sapiens	2	2	2	2	2	2	2	2	2	2	2	2	2	2	2	2	354507000	412281000	309017000	241006000	509038000	607737000	383252000	243091700	246102000	685699000	385504000	151509000	337636000	605852000	287837000	87907000
P67809	>P67809|YBOX1_HUMAN Nuclease-sensitive element-binding protein 1 |Homo sapiens	7	6	6	4	6	7	5	5	5	5	6	4	5	4	3	4	49395890	20326570	21099860	9287130	30411600	26163920	24401950	19815600	12842170	8234400	13670190	5155410	14669726	8719160	5666200	4477420
P06737	>P06737|PYGL_HUMAN Glycogen phosphorylase, liver form |Homo sapiens	34	34	14	23	37	18	25	25	38	32	9	21	37	29	22	18	100798780	133228600	7704500	25835820	260100900	18295962	43054460	63229480	202034980	100543910	3594370	34588883	274303500	112777860	40185840	24715517
O15143	>O15143|ARC1B_HUMAN Actin-related protein 2/3 complex subunit 1B |Homo sapiens	8	7	6	5	9	8	4	3	6	7	3	5	10	7	6	3	45701590	21434730	9152260	12829910	55969900	24912560	11562000	7870460	28155400	16745750	7189880	18484830	53496490	24893720	11386750	3102040
P62820	>P62820|RAB1A_HUMAN Ras-related protein Rab-1A |Homo sapiens	0	1	0	1	1	1	1	1	0	1	0	1	1	0	0	0	0	823120	0	858860	1039300	488410	830560	1970100	0	776420	0	808330	662320	0	0	0
P23528	>P23528|COF1_HUMAN Cofilin-1 |Homo sapiens	13	10	13	10	10	12	12	12	11	10	12	8	10	8	9	10	195398110	79310727	73725399	50505460	78898670	103548930	73650170	79105970	80192730	81981626	56981574	50715430	114711300	80436000	68328864	28887430
Q9Y6W5	>Q9Y6W5|WASF2_HUMAN Wiskott-Aldrich syndrome protein family member 2 |Homo sapiens	8	6	6	4	7	7	5	5	6	5	5	4	6	4	3	2	40823270	13674530	7358700	2898330	24537700	21875720	6353570	4049810	18746260	14429800	7237160	2501510	27287400	11010800	5238400	2002250
P00367	>P00367|DHE3_HUMAN Glutamate dehydrogenase 1, mitochondrial |Homo sapiens	15	18	17	14	17	18	17	17	15	18	16	13	15	16	16	16	83730170	328446600	148388730	73989250	91829610	352253300	222747200	104977770	80822930	339513500	187991820	61569510	104648270	343937700	166937500	71672800
Q9ULX6	>Q9ULX6|AKP8L_HUMAN A-kinase anchor protein 8-like |Homo sapiens	0	1	2	3	0	1	2	1	0	2	2	2	0	1	1	1	0	1046100	3842900	7164700	0	714740	2951770	205820	0	846950	5312200	3076060	0	392860	787390	1545400
Q6WCQ1	>Q6WCQ1|MPRIP_HUMAN Myosin phosphatase Rho-interacting protein |Homo sapiens	2	2	2	2	2	2	1	0	2	1	0	2	2	1	0	1	2561300	1377880	436310	434980	891430	1327250	835630	0	1272580	1822100	0	485080	934300	218030	0	432510
P30837;O94788	>P30837|AL1B1_HUMAN Aldehyde dehydrogenase X, mitochondrial |Homo sapiens;>O94788|AL1A2_HUMAN Retinal dehydrogenase 2 |Homo sapiens	1	1	0	1	1	1	0	0	0	1	0	0	1	0	0	1	5325400	2833800	0	643350	2450200	1023600	0	0	0	2685700	0	0	5344100	0	0	168060
P61011	>P61011|SRP54_HUMAN Signal recognition particle 54 kDa protein |Homo sapiens	37	39	37	22	35	40	37	30	38	40	38	26	35	37	35	20	189448030	503782340	129618600	40197860	124803390	451712160	227837730	88822800	237800755	503913670	222848520	67211600	190666580	547358770	221671996	36794760
Q9BTC8;Q13330	>Q9BTC8|MTA3_HUMAN Metastasis-associated protein MTA3 |Homo sapiens;>Q13330|MTA1_HUMAN Metastasis-associated protein MTA1 |Homo sapiens	3	3	3	3	3	3	4	4	3	3	4	3	3	3	3	2	2984190	13949000	4931810	3961950	3569650	15588230	28537000	10417600	1850430	13500700	21525900	4057540	2092840	13357200	15741310	5718100
Q13315	>Q13315|ATM_HUMAN Serine-protein kinase ATM |Homo sapiens	0	0	0	3	0	0	0	3	0	0	0	5	0	0	0	2	0	0	0	819300	0	0	0	2609590	0	0	0	2343110	0	0	0	1102740
Q8WYP5	>Q8WYP5|ELYS_HUMAN Protein ELYS |Homo sapiens	0	1	0	1	0	0	1	0	0	1	0	0	1	1	0	0	0	368500	0	155760	0	0	469790	0	0	512070	0	0	240080	325300	0	0
Q02252	>Q02252|MMSA_HUMAN Methylmalonate-semialdehyde dehydrogenase [acylating], mitochondrial |Homo sapiens	2	2	1	0	2	2	2	1	2	2	2	0	2	2	1	1	5196900	3041100	634310	0	4928300	2704210	2430600	393460	3663300	2812100	1828200	0	4903100	3324700	2171600	340670
P11137	>P11137|MAP2_HUMAN Microtubule-associated protein 2 |Homo sapiens	0	2	0	0	1	0	1	1	0	1	1	0	0	0	0	0	0	1901813	0	0	110000	0	1173100	1708200	0	1270500	565620	0	0	0	0	0
P35606	>P35606|COPB2_HUMAN Coatomer subunit beta |Homo sapiens	30	40	28	29	34	29	33	33	33	38	25	34	33	35	37	26	51708500	433292580	37986570	66937310	139502800	127428640	153338110	101365910	186198990	422729740	34676430	101569050	144976320	251672953	227884610	61015140
P52435;Q9GZM3;Q9H1A7	>P52435|RPB11_HUMAN DNA-directed RNA polymerase II subunit RPB11-a |Homo sapiens;>Q9GZM3|RPB1B_HUMAN DNA-directed RNA polymerase II subunit RPB11-b1 |Homo sapiens;>Q9H1A7|RPB1C_HUMAN DNA-directed RNA polymerase II subunit RPB11-b2 |Homo sapiens	3	4	4	4	3	3	3	4	3	4	4	4	3	4	3	4	4593210	18425100	37290200	23410500	2956210	22783100	39445500	16780600	2120700	14375570	50521600	19266200	4315470	22541290	30639800	16595600
O43707;Q08043	>O43707|ACTN4_HUMAN Alpha-actinin-4 |Homo sapiens;>Q08043|ACTN3_HUMAN Alpha-actinin-3 |Homo sapiens	1	1	1	1	1	1	1	1	1	1	1	1	1	1	1	1	1844700	3393900	335140	1474600	2253600	2683400	5962800	2610000	2072100	3266500	430780	4072900	1942500	1744600	5309300	694340
Q6IEG0	>Q6IEG0|SNR48_HUMAN U11/U12 small nuclear ribonucleoprotein 48 kDa protein |Homo sapiens	1	2	2	2	0	2	1	0	1	2	2	2	1	2	1	0	431740	2265110	2043720	817100	0	1436470	990330	0	241340	1416320	2626600	545020	398860	1793520	901460	0
P62191	>P62191|PRS4_HUMAN 26S protease regulatory subunit 4 |Homo sapiens	21	28	36	41	20	34	36	41	19	22	34	40	18	22	32	41	30617030	66568730	189603610	503262790	27699830	106397080	227125360	516606130	18480710	72222760	284321220	465217770	30570201	65725870	163629130	366660100
Q16851	>Q16851|UGPA_HUMAN UTP--glucose-1-phosphate uridylyltransferase |Homo sapiens	11	21	23	18	8	22	21	20	7	20	22	20	10	20	21	18	8315800	149616740	119094620	42105100	4645260	144173930	174273260	53444900	4866080	111759610	136429540	41941810	7.48935e+06	118037850	130966590	33185850
P62699	>P62699|YPEL5_HUMAN Protein yippee-like 5 |Homo sapiens	2	0	2	3	0	1	1	3	0	0	2	3	0	0	1	3	522780	0	1497960	8886800	0	537060	461190	7635800	0	0	1528990	7777300	0	0	577510	5558100
Q9NQT4	>Q9NQT4|EXOS5_HUMAN Exosome complex component RRP46 |Homo sapiens	14	14	14	12	15	14	12	12	14	14	14	12	14	13	12	11	170762300	109378000	37813040	16967330	133593900	119186400	43993600	23890160	124572800	155492900	62324570	20246740	135384300	160478700	43700830	14889700
P45974	>P45974|UBP5_HUMAN Ubiquitin carboxyl-terminal hydrolase 5 |Homo sapiens	3	2	3	3	3	4	3	3	4	3	3	2	3	3	2	1	10329090	5979000	5128610	3631860	7207600	11616360	7086460	4667940	7722470	4712710	4016320	2807680	6775270	6470380	4605700	1549900
Q9BZK7	>Q9BZK7|TBL1R_HUMAN F-box-like/WD repeat-containing protein TBL1XR1 |Homo sapiens	5	5	5	5	5	5	5	5	5	5	5	4	5	5	5	2	14161900	11144300	7551710	5888880	11817800	17489700	11314400	7191180	7770140	8624140	7883390	2770860	8528110	10014600	5934870	1568180
Q96KP1	>Q96KP1|EXOC2_HUMAN Exocyst complex component 2 |Homo sapiens	1	3	0	1	1	0	0	1	1	2	0	1	2	1	0	1	340730	9968600	0	415230	933870	0	0	664040	1485400	3713440	0	593570	2345410	2262200	0	403150
Q9Y597;Q8TBC3	>Q9Y597|KCTD3_HUMAN BTB/POZ domain-containing protein KCTD3 |Homo sapiens;>Q8TBC3|SHKB1_HUMAN SH3KBP1-binding protein 1 |Homo sapiens	1	1	1	1	0	0	1	1	0	0	1	1	0	1	0	1	3372300	2060200	367050	2368400	0	0	1327800	3037200	0	0	600220	2803400	0	257340	0	3541200
Q7Z7C8	>Q7Z7C8|TAF8_HUMAN Transcription initiation factor TFIID subunit 8 |Homo sapiens	2	2	2	2	1	1	2	1	1	2	2	1	1	1	1	2	956210	908290	5127000	3347100	893120	651340	5536500	887130	291900	825130	8028000	2088700	257240	437890	3367700	6829300
P78347	>P78347|GTF2I_HUMAN General transcription factor II-I |Homo sapiens	5	6	5	5	5	5	5	6	5	5	5	5	5	6	5	4	11228600	17695170	4802740	5835550	15457600	10699000	8779000	10389000	5193160	5388760	5499330	5102980	10373700	16108240	5161670	3088030
P84098	>P84098|RL19_HUMAN 60S ribosomal protein L19 |Homo sapiens	1	2	1	3	3	2	2	3	0	1	1	1	2	1	0	2	26385	201563	80772	640074	2462520	369420	1475350	2536050	0	132790	23078	206970	531582	346270	0	694410
O75817	>O75817|POP7_HUMAN Ribonuclease P protein subunit p20 |Homo sapiens	2	1	3	4	2	2	3	3	2	2	3	3	2	1	3	3	2688050	2135000	14444600	33806700	1398720	3393700	15308200	28995700	1278890	3362100	18334800	25861300	1662780	956590	12872700	38918700
Q9UKF6	>Q9UKF6|CPSF3_HUMAN Cleavage and polyadenylation specificity factor subunit 3 |Homo sapiens	12	18	17	13	16	16	13	16	12	18	16	15	13	18	19	16	17729040	129791970	27063780	30719850	36806640	53684720	72557330	60588510	33258480	134400910	42846340	41763150	30774570	117435130	126478750	31433230
O14929	>O14929|HAT1_HUMAN Histone acetyltransferase type B catalytic subunit |Homo sapiens	3	2	0	1	2	1	2	2	2	2	0	2	2	2	1	1	5298490	2780460	0	1255600	7242610	2869300	2579690	2280890	4770450	4764600	0	2857280	5695380	3927710	2252400	1381900
O94888	>O94888|UBXN7_HUMAN UBX domain-containing protein 7 |Homo sapiens	0	1	1	1	1	1	0	1	1	1	1	1	1	1	0	1	0	709320	513100	832300	211960	2549200	0	697550	494240	713010	794260	645850	173190	765440	0	1618700
O60333	>O60333|KIF1B_HUMAN Kinesin-like protein KIF1B |Homo sapiens	0	0	0	0	0	0	0	0	1	0	0	0	0	0	0	0	0	0	0	0	0	0	0	0	467450	0	0	0	0	0	0	0
P37802;Q9UI15	>P37802|TAGL2_HUMAN Transgelin-2 |Homo sapiens;>Q9UI15|TAGL3_HUMAN Transgelin-3 |Homo sapiens	1	1	1	1	1	1	1	1	1	1	1	1	1	1	1	1	2453700	1445600	1016900	796570	2996200	3916200	1118900	868590	1704900	1636400	1555900	1219100	2243300	1943000	2522900	1469100
O15067	>O15067|PUR4_HUMAN Phosphoribosylformylglycinamidine synthase |Homo sapiens	45	44	40	38	46	36	42	38	44	41	35	34	44	38	28	24	335078640	202522990	64805250	63396350	354108340	174385280	141491340	106539350	259511810	142372990	69648070	49213810	285893710	171650530	81740800	27536130
P62318	>P62318|SMD3_HUMAN Small nuclear ribonucleoprotein Sm D3 |Homo sapiens	19	18	20	18	20	19	20	19	19	19	18	16	18	19	14	17	736108630	424420200	346668140	170325170	483498800	652453500	351272000	172504990	380343100	330607480	280758010	118147900	409651240	419353890	280472300	144246660
P60660;P14649	>P60660|MYL6_HUMAN Myosin light polypeptide 6 |Homo sapiens;>P14649|MYL6B_HUMAN Myosin light chain 6B |Homo sapiens	2	2	2	2	2	2	2	2	2	2	2	2	2	2	2	2	71578000	53557000	71844000	82537000	45279000	72403000	102436000	97346000	32342000	44413000	93906000	68906000	40191000	47819000	44672000	50512000
O95613	>O95613|PCNT_HUMAN Pericentrin |Homo sapiens	0	0	0	0	0	0	1	0	1	0	0	0	0	0	0	0	0	0	0	0	0	0	49811000	0	3099900	0	0	0	0	0	0	0
Q9UMS4	>Q9UMS4|PRP19_HUMAN Pre-mRNA-processing factor 19 |Homo sapiens	37	37	31	31	38	32	34	30	38	36	33	29	35	34	27	24	646325250	370617780	134343450	96943580	686309450	387215200	234608960	155663740	432452190	383172760	139945760	99921020	496580510	316305370	164045390	67603920
O43776	>O43776|SYNC_HUMAN Asparagine--tRNA ligase, cytoplasmic |Homo sapiens	5	5	2	3	6	4	4	4	5	4	1	0	6	5	2	0	6783220	5891627	943320	2627430	12333390	8164930	3696220	3329160	6678170	3402748	406140	0	7832330	5298550	3022270	0
P52907	>P52907|CAZA1_HUMAN F-actin-capping protein subunit alpha-1 |Homo sapiens	16	15	17	17	13	13	16	17	12	15	17	15	13	15	12	16	122134720	91629820	229474330	216782000	65436310	118159160	233024640	216504850	52927540	76325020	293627800	168349870	66697410	105726150	133016520	161181800
Q9UKK9	>Q9UKK9|NUDT5_HUMAN ADP-sugar pyrophosphatase |Homo sapiens	5	5	5	5	5	5	5	4	5	5	5	1	5	6	4	4	27123800	21248800	11260120	4471070	16143700	25037900	12867500	4636970	14946130	16345500	8864130	1127100	8214780	16225900	7118510	2847310
Q9UI10	>Q9UI10|EI2BD_HUMAN Translation initiation factor eIF-2B subunit delta |Homo sapiens	8	8	6	2	8	4	1	5	11	11	9	7	9	10	8	4	10092370	7930540	1632850	745600	14694240	3092830	1055200	3817860	24033023	50155170	12317760	9103240	21437750	43833700	18413660	2933500
Q9UHB6	>Q9UHB6|LIMA1_HUMAN LIM domain and actin-binding protein 1 |Homo sapiens	1	2	3	3	1	2	0	2	1	1	3	3	1	1	0	0	253530	1793860	1683260	1639360	789670	2718540	0	3338550	1119700	1365700	2955760	1742470	177420	890870	0	0
Q96S59;Q6VN20	>Q96S59|RANB9_HUMAN Ran-binding protein 9 |Homo sapiens;>Q6VN20|RBP10_HUMAN Ran-binding protein 10 |Homo sapiens	0	0	0	1	0	0	0	1	0	0	1	1	0	0	0	0	0	0	0	495950	0	0	0	1432200	0	0	396400	517460	0	0	0	0
Q9UL46	>Q9UL46|PSME2_HUMAN Proteasome activator complex subunit 2 |Homo sapiens	7	6	5	3	7	5	6	4	6	6	5	5	6	5	5	3	25467560	16155290	5657150	2833660	16042620	11932300	9130630	6850520	20396940	13238070	5201260	4783820	23750690	10351820	9237470	3446630
Q15019	>Q15019|SEPT2_HUMAN Septin-2 |Homo sapiens	30	28	28	25	29	26	23	23	27	27	27	23	29	27	24	18	433424410	203099100	134869128	70353780	270822810	219953320	118943880	74403860	212365110	153112710	117674850	52938140	298996810	189589660	76116990	33606920
Q12824	>Q12824|SNF5_HUMAN SWI/SNF-related matrix-associated actin-dependent regulator of chromatin subfamily B member 1 |Homo sapiens	6	7	13	12	6	7	12	12	6	6	12	12	6	6	12	12	12435060	14063030	59857750	67403950	8899710	15333610	67468690	89386400	7001340	9289240	86490700	64971120	9712920	11947280	48730600	59046700
Q8IWS0	>Q8IWS0|PHF6_HUMAN PHD finger protein 6 |Homo sapiens	1	1	1	1	1	1	1	1	1	1	1	0	1	1	1	1	6452200	3138400	1319800	841320	2914600	2181500	2544300	3014500	2451700	1762400	1991100	0	2591800	2623400	1318500	420860
O00505	>O00505|IMA3_HUMAN Importin subunit alpha-3 |Homo sapiens	2	3	2	2	2	2	2	2	2	2	3	2	2	2	2	1	4583400	13429800	3316700	3587300	6121800	9003000	3357500	2411140	5380200	11628900	9874300	5155100	6872500	9638700	12672200	3645300
P34932	>P34932|HSP74_HUMAN Heat shock 70 kDa protein 4 |Homo sapiens	19	20	14	12	17	17	10	12	20	20	17	16	18	15	16	9	95750900	66337290	29293120	21752040	65317360	57952450	35628570	35950560	53556000	78123220	36720430	33125790	79902832	58194800	41538760	14633536
Q6P6C2	>Q6P6C2|ALKB5_HUMAN Probable alpha-ketoglutarate-dependent dioxygenase ABH5 |Homo sapiens	0	1	1	1	0	1	1	1	0	1	1	1	1	1	0	1	0	206760	405930	677350	0	664990	471140	551500	0	342910	471660	340540	111250	454360	0	438350
Q14249	>Q14249|NUCG_HUMAN Endonuclease G, mitochondrial |Homo sapiens	1	0	0	0	0	1	0	0	0	0	0	0	1	1	0	0	777550	0	0	0	0	1207300	0	0	0	0	0	0	365090	560980	0	0
P67809;P16989	>P67809|YBOX1_HUMAN Nuclease-sensitive element-binding protein 1 |Homo sapiens;>P16989|DBPA_HUMAN DNA-binding protein A |Homo sapiens	2	2	2	2	2	2	2	2	1	2	2	2	1	2	2	2	9644600	4554600	3445800	3822500	6368100	13825400	6394500	5927300	1477900	2005890	3082680	3011420	1510400	3357930	2854700	3365300
Q16555;Q14194;Q14195	>Q16555|DPYL2_HUMAN Dihydropyrimidinase-related protein 2 |Homo sapiens;>Q14194|DPYL1_HUMAN Dihydropyrimidinase-related protein 1 |Homo sapiens;>Q14195|DPYL3_HUMAN Dihydropyrimidinase-related protein 3 |Homo sapiens	1	1	1	1	1	1	1	1	1	1	1	1	1	1	1	1	4062100	2741000	798460	249000	4084000	1141200	1089800	1037100	2616800	1478900	559620	462660	4060500	2335200	932920	221240
P11586;Q6UB35	>P11586|C1TC_HUMAN C-1-tetrahydrofolate synthase, cytoplasmic |Homo sapiens;>Q6UB35|C1TM_HUMAN Monofunctional C1-tetrahydrofolate synthase, mitochondrial |Homo sapiens	2	2	2	2	2	1	1	1	2	2	2	2	2	2	2	1	21723000	11314500	2159130	2751900	9052900	6544500	2445100	1949800	12519300	10742100	4534500	3525000	17442600	9985800	4914100	1442800
Q4VCS5	>Q4VCS5|AMOT_HUMAN Angiomotin |Homo sapiens	10	10	9	7	9	9	7	8	9	10	9	9	10	9	7	5	21947640	17930260	11433690	5044140	17029670	15897570	9502680	11081860	14618380	19114520	12850150	11349660	26706050	16180910	10225250	3169010
Q01081	>Q01081|U2AF1_HUMAN Splicing factor U2AF 35 kDa subunit |Homo sapiens	3	3	2	2	1	3	2	2	3	3	3	1	3	3	2	1	18435100	13023600	7671700	6192400	8942200	16954300	7356700	7436300	7568120	8808050	9486040	5880200	14148300	11957800	4191270	1689800
P52565	>P52565|GDIR1_HUMAN Rho GDP-dissociation inhibitor 1 |Homo sapiens	3	4	4	4	5	5	3	4	2	2	2	4	3	5	4	4	17712100	7606540	9786040	7510030	15788540	24627300	13009000	10325590	5399000	5505500	6084300	6858090	8114110	11029360	10455730	7017550
P21281	>P21281|VATB2_HUMAN V-type proton ATPase subunit B, brain isoform |Homo sapiens	10	12	10	9	8	12	11	9	10	12	11	6	9	14	11	4	39510350	117889400	27672390	14615370	15699300	93640200	37586380	19689100	25809170	100179600	35829540	6957420	27578950	86688330	32742620	5171640
O43488;Q8NHP1	>O43488|ARK72_HUMAN Aflatoxin B1 aldehyde reductase member 2 |Homo sapiens;>Q8NHP1|ARK74_HUMAN Aflatoxin B1 aldehyde reductase member 4 |Homo sapiens	2	2	2	2	2	2	2	2	2	2	2	2	2	2	0	0	5427850	3977680	1762100	1711660	4499600	4890520	2377320	2601140	1249810	2453060	2108660	1272250	3081703	3546720	0	0
Q9NP66	>Q9NP66|HM20A_HUMAN High mobility group protein 20A |Homo sapiens	0	0	1	1	1	1	0	0	0	0	0	0	1	1	1	1	0	0	1632100	2605700	7779300	5252500	0	0	0	0	0	0	1426500	2126800	2132900	3797800
P35998	>P35998|PRS7_HUMAN 26S protease regulatory subunit 7 |Homo sapiens	22	26	34	37	17	25	35	36	14	27	35	37	23	26	35	38	42565090	74570730	166116920	444498030	18769990	73848430	226109080	412263700	24464870	72405000	302622820	494941330	37500096	68501900	160865780	373551780
P47897	>P47897|SYQ_HUMAN Glutamine--tRNA ligase |Homo sapiens	8	22	20	36	17	7	30	37	9	21	22	39	11	18	28	29	3347018	29547350	12647047	139648573	16301380	4410250	100867360	250782700	6551561	35610577	12932643	175898889	7642700	25523730	96149675	97768560
Q9BVC5	>Q9BVC5|ASHWN_HUMAN Ashwin |Homo sapiens	2	2	2	1	2	2	1	1	2	2	2	1	2	2	2	0	9117100	3062700	3075460	928100	6744600	6756000	788110	1675100	4842700	3232020	1980520	613460	6749400	3019760	1671510	0
P12270	>P12270|TPR_HUMAN Nucleoprotein TPR |Homo sapiens	48	39	37	32	48	41	26	34	37	40	35	28	42	31	24	25	122937710	66886479	47620430	37887081	98020440	114891820	52364150	50073880	63280360	60053790	36726618	26967836	90634887	65044450	40660920	19464997
O75165	>O75165|DJC13_HUMAN DnaJ homolog subfamily C member 13 |Homo sapiens	3	3	0	1	3	0	0	2	3	3	0	2	3	3	2	1	1251370	5310400	0	397460	7593400	0	0	1431440	5873200	5962600	0	922520	7074470	4202500	2262900	346480
Q9ULM3	>Q9ULM3|YETS2_HUMAN YEATS domain-containing protein 2 |Homo sapiens	2	3	10	14	1	2	9	12	2	4	14	16	3	3	7	10	402300	1244800	4901960	15623281	261020	1348330	9564670	20404530	336142	1374989	11201747	19201477	695447	1185440	6038556	9554520
O15131	>O15131|IMA5_HUMAN Importin subunit alpha-6 |Homo sapiens	1	1	1	1	1	1	0	0	1	1	1	1	1	1	1	1	390710	839780	332590	321740	796730	850910	0	0	464250	922340	533470	454670	457780	909340	1403300	366150
Q9UHD9	>Q9UHD9|UBQL2_HUMAN Ubiquilin-2 |Homo sapiens	2	1	2	2	1	2	1	0	1	2	2	1	2	2	1	2	7368000	3393300	6039500	2990300	3211500	6458600	2075700	0	469920	4140700	4489800	1435400	3910300	4883900	2021100	1978960
P11182	>P11182|ODB2_HUMAN Lipoamide acyltransferase component of branched-chain alpha-keto acid dehydrogenase complex, mitochondrial |Homo sapiens	0	0	2	3	0	0	0	3	0	0	3	3	0	0	0	4	0	0	551260	5855870	0	0	0	9419580	0	0	3228400	8479900	0	0	0	15049700
O43660	>O43660|PLRG1_HUMAN Pleiotropic regulator 1 |Homo sapiens	12	12	10	7	13	10	9	12	9	11	12	7	13	11	8	6	46844700	28830795	6630380	3925196	63707810	18732430	13490320	16222140	29093100	20353091	11786458	6249640	50358140	26701300	10924920	3061980
P52434	>P52434|RPAB3_HUMAN DNA-directed RNA polymerases I, II, and III subunit RPABC3 |Homo sapiens	3	5	7	7	2	6	7	6	2	5	6	6	2	6	7	7	2678970	20219230	62630250	48924990	1251150	48056400	100419700	31934400	1076990	19019890	57828900	38713060	2127660	23488900	86399740	54826900
P07237	>P07237|PDIA1_HUMAN Protein disulfide-isomerase |Homo sapiens	26	23	25	24	22	27	23	22	20	25	25	23	24	25	24	20	138232280	110667180	105077370	64461670	91221330	197461360	149046520	71986880	73446070	103357630	117037290	59814790	113884800	150467780	122437880	49288430
P09012	>P09012|SNRPA_HUMAN U1 small nuclear ribonucleoprotein A |Homo sapiens	8	7	7	6	12	9	7	7	8	7	6	7	9	5	7	6	76031800	28754500	13712180	8821650	83949950	74735700	33363500	19133570	47533930	37557080	16079520	7937885	51224890	27455390	26382345	5815180
Q9NWS0	>Q9NWS0|PIHD1_HUMAN PIH1 domain-containing protein 1 |Homo sapiens	3	3	2	2	3	2	3	2	2	3	3	2	3	3	1	1	4305540	3572690	1550350	664530	3142570	3007800	3056770	1307400	2125500	3722110	2602370	848020	3994180	3954450	779330	637250
P37198	>P37198|NUP62_HUMAN Nuclear pore glycoprotein p62 |Homo sapiens	7	7	7	4	5	5	5	4	7	6	7	5	6	6	6	3	58316100	28285710	15306590	10238327	40708700	26842140	16302440	9898287	35982330	30422300	14036720	9045830	45945380	34107140	14806128	4109710
P27708	>P27708|PYR1_HUMAN CAD protein |Homo sapiens	4	24	7	41	11	5	29	46	15	22	10	46	14	16	34	39	1180270	35170750	2616930	206897450	8797740	10135100	106280220	483452700	36177870	30733430	5050440	325525510	13266460	22966290	113357430	148632740
O00629;O00505	>O00629|IMA4_HUMAN Importin subunit alpha-4 |Homo sapiens;>O00505|IMA3_HUMAN Importin subunit alpha-3 |Homo sapiens	2	2	1	0	2	3	2	1	1	2	1	1	2	2	3	2	29656700	13645100	2471500	0	17905500	33816200	5718030	2921300	2894400	38903600	4607400	8952300	28238400	8853000	14718598	4248500
P48556	>P48556|PSMD8_HUMAN 26S proteasome non-ATPase regulatory subunit 8 |Homo sapiens	2	4	3	3	2	2	3	2	1	4	4	4	3	3	2	3	1168420	4462480	2490390	6802500	919230	2806200	7290300	7810900	520280	3411360	4405490	9778800	2037250	2570110	7008000	8427830
P55209	>P55209|NP1L1_HUMAN Nucleosome assembly protein 1-like 1 |Homo sapiens	12	12	12	11	12	11	12	10	10	12	11	10	13	11	8	7	223857420	130635600	107827500	59508300	156416500	181340400	121362800	80965600	119320100	90404590	83070900	47789150	156562420	134342400	52576500	22817230
P50213	>P50213|IDH3A_HUMAN Isocitrate dehydrogenase [NAD] subunit alpha, mitochondrial |Homo sapiens	5	5	3	2	7	6	3	2	7	5	2	2	6	4	4	4	36640110	16120330	5682200	3768100	42120330	30386740	7264000	3285000	32523000	15915550	4484600	2433250	35877600	15085530	8354058	6331480
Q9UBI1	>Q9UBI1|COMD3_HUMAN COMM domain-containing protein 3 |Homo sapiens	3	3	3	2	4	3	3	1	3	3	3	2	3	3	3	2	8317500	16086600	6133700	2823020	8111340	17087400	6921300	1867000	6564500	14382700	8522300	2109670	6481600	14935000	7646500	2769930
Q9Y3Z3	>Q9Y3Z3|SAMH1_HUMAN SAM domain and HD domain-containing protein 1 |Homo sapiens	8	7	7	4	8	6	3	4	8	8	6	5	7	6	3	1	23030500	14465600	9893990	2089870	20569260	10382520	2856350	3919900	14940360	16332190	10055280	2775840	16418500	10404470	2673960	374140
O14519	>O14519|CDKA1_HUMAN Cyclin-dependent kinase 2-associated protein 1 |Homo sapiens	2	3	4	4	1	3	4	3	1	4	4	4	2	4	2	3	1613970	13407400	13897300	4902120	952380	23453400	29731500	4443640	1632800	22643600	27593400	7237220	1811880	19221100	15042300	4853010
Q9UBQ0	>Q9UBQ0|VPS29_HUMAN Vacuolar protein sorting-associated protein 29 |Homo sapiens	4	4	2	1	3	4	2	1	2	4	0	2	3	3	0	1	4945600	2689930	657350	390350	2563470	3845800	1343240	484870	1544420	1475840	0	702000	2524790	2252080	0	467540
Q07955	>Q07955|SRSF1_HUMAN Serine/arginine-rich splicing factor 1 |Homo sapiens	3	3	2	2	3	2	2	2	2	3	3	3	3	2	1	2	2625730	1465670	1326590	1165320	3001450	2901210	1728320	1341850	676750	1298870	1881300	847490	2044870	1062470	767340	339684
Q9UKV8;Q9H9G7;Q9UL18;Q9HCK5	>Q9UKV8|AGO2_HUMAN Protein argonaute-2 |Homo sapiens;>Q9H9G7|AGO3_HUMAN Protein argonaute-3 |Homo sapiens;>Q9UL18|AGO1_HUMAN Protein argonaute-1 |Homo sapiens;>Q9HCK5|AGO4_HUMAN Protein argonaute-4 |Homo sapiens	0	0	0	0	1	0	0	0	1	0	0	0	0	0	0	0	0	0	0	0	592640	0	0	0	323830	0	0	0	0	0	0	0
P68104;Q5VTE0	>P68104|EF1A1_HUMAN Elongation factor 1-alpha 1 |Homo sapiens;>Q5VTE0|EF1A3_HUMAN Putative elongation factor 1-alpha-like 3 |Homo sapiens	43	44	43	38	44	48	40	40	42	44	43	38	37	37	44	42	2084676517	2960699272	1695149896	881434042	1451477750	2696844610	1646342830	1140460226	1579249356	2581516250	2307999174	1037680054	1515575670	2674531970	1.42126e+09	620205600
Q9BPZ7	>Q9BPZ7|SIN1_HUMAN Target of rapamycin complex 2 subunit MAPKAP1 |Homo sapiens	1	1	1	1	1	1	1	1	0	1	1	1	1	1	1	1	400560	1228300	1542200	2394200	389320	863370	2193700	3114500	0	1108400	1387100	1799100	800470	1150200	2685400	2682700
Q13616	>Q13616|CUL1_HUMAN Cullin-1 |Homo sapiens	13	13	3	11	16	3	6	9	17	14	1	10	14	14	8	6	18511620	33141150	633000	9615010	78842000	3114420	11256480	16653960	67533010	28265470	267740	14357910	57934720	25061160	13918590	6729730
Q04637;O43432	>Q04637|IF4G1_HUMAN Eukaryotic translation initiation factor 4 gamma 1 |Homo sapiens;>O43432|IF4G3_HUMAN Eukaryotic translation initiation factor 4 gamma 3 |Homo sapiens	1	0	0	1	1	1	1	1	1	0	0	0	1	0	0	1	760540	0	0	1120500	2724600	898840	1610300	1824700	746620	0	0	0	961410	0	0	1264700
P07195	>P07195|LDHB_HUMAN L-lactate dehydrogenase B chain |Homo sapiens	35	34	27	29	34	34	29	30	33	33	29	27	35	34	31	30	1116391400	685023620	192802050	291823850	1085480260	601347730	374072510	377944830	1066389290	639684800	206214970	231992570	1282692640	847415090	542539450	199068590
P52701	>P52701|MSH6_HUMAN DNA mismatch repair protein Msh6 |Homo sapiens	8	7	3	3	10	2	2	6	10	7	2	3	8	7	3	2	8998040	10085440	1060700	2226190	19094727	1580940	4072580	9084730	14151670	7381930	895580	2312830	16919920	10333540	4665000	953350
Q9H6W3	>Q9H6W3|NO66_HUMAN Lysine-specific demethylase NO66 |Homo sapiens	0	1	1	1	1	1	1	1	1	1	1	1	1	0	0	1	0	2423000	37982000	35594000	1899700	4672400	101380000	94531000	376000	1046900	51553000	27654000	87490	0	0	86121000
P62937;Q9Y536	>P62937|PPIA_HUMAN Peptidyl-prolyl cis-trans isomerase A |Homo sapiens;>Q9Y536|PAL4A_HUMAN Peptidyl-prolyl cis-trans isomerase A-like 4A/B/C |Homo sapiens	1	1	1	1	1	1	1	1	1	1	1	1	1	1	1	1	55598000	39593000	36942000	42017000	46600000	66777000	68816000	60262000	13055000	21555000	34199000	27217000	21187000	31822000	39049000	16310000
P12277;P06732	>P12277|KCRB_HUMAN Creatine kinase B-type |Homo sapiens;>P06732|KCRM_HUMAN Creatine kinase M-type |Homo sapiens	1	0	1	0	0	1	1	1	0	0	0	0	1	1	1	1	4968100	0	413320	0	0	9432100	1643300	2545600	0	0	0	0	2662900	4246500	5293100	1315800
P17066;P48741	>P17066|HSP76_HUMAN Heat shock 70 kDa protein 6 |Homo sapiens;>P48741|HSP77_HUMAN Putative heat shock 70 kDa protein 7 |Homo sapiens	2	2	2	2	2	1	2	2	2	2	2	2	2	2	2	2	149854100	102128400	117537760	85298300	106133970	184440000	156451600	110917300	102345480	135883600	109975200	87624900	122010900	122853200	126365800	72566300
P61956;P55854;Q6EEV6	>P61956|SUMO2_HUMAN Small ubiquitin-related modifier 2 |Homo sapiens;>P55854|SUMO3_HUMAN Small ubiquitin-related modifier 3 |Homo sapiens;>Q6EEV6|SUMO4_HUMAN Small ubiquitin-related modifier 4 |Homo sapiens	1	1	1	1	1	1	1	1	1	1	1	1	1	1	1	1	15832000	9138800	9737200	7117300	12951000	16185000	10965000	9047500	8923100	7999000	6529200	3725100	6342300	10611000	7284000	3516800
O75643	>O75643|U520_HUMAN U5 small nuclear ribonucleoprotein 200 kDa helicase |Homo sapiens	9	26	4	59	31	6	44	60	19	20	4	58	30	22	42	57	5189300	22966260	5331540	340575020	40944100	6159070	162069720	593281730	22664540	14446460	976480	418195210	29870310	31161100	121520900	278799470
Q14232	>Q14232|EI2BA_HUMAN Translation initiation factor eIF-2B subunit alpha |Homo sapiens	2	3	0	1	2	0	0	0	3	4	2	3	4	4	4	2	1184170	1796450	0	383640	1548010	0	0	0	7396600	16824700	801810	2541870	7788610	8855370	7729600	1387610
P42858	>P42858|HD_HUMAN Huntingtin |Homo sapiens	9	19	0	8	19	1	5	8	20	17	1	6	18	16	6	4	4904340	30496880	0	3610110	34456510	420010	3945350	6761640	32730840	22126480	1725500	2992850	26110484	18151090	5446720	2778270
Q9NZN8	>Q9NZN8|CNOT2_HUMAN CCR4-NOT transcription complex subunit 2 |Homo sapiens	4	12	14	15	1	15	16	15	3	10	16	15	7	11	14	16	3262550	25874700	61190900	48666890	1788600	34344480	98068910	55986640	3374690	27727810	95670820	52280070	5233701	20397050	47438200	52693220
P42166;P42167	>P42166|LAP2A_HUMAN Lamina-associated polypeptide 2, isoform alpha |Homo sapiens;>P42167|LAP2B_HUMAN Lamina-associated polypeptide 2, isoforms beta/gamma |Homo sapiens	3	3	3	2	1	3	3	4	1	2	3	1	2	1	1	3	3424650	3241310	2657430	2318790	1707600	4856470	5335220	7454280	1371000	1954580	2935860	1222100	2285880	1568200	1379400	2086040
Q9NR33	>Q9NR33|DPOE4_HUMAN DNA polymerase epsilon subunit 4 |Homo sapiens	3	3	2	0	3	3	1	1	3	2	1	2	3	3	1	0	7278400	4055890	4384620	0	4888850	3724050	1793100	692340	5306450	4542000	558980	2640270	5616770	5493990	2057600	0
Q04637	>Q04637|IF4G1_HUMAN Eukaryotic translation initiation factor 4 gamma 1 |Homo sapiens	13	12	6	9	12	8	9	11	10	11	3	10	12	10	8	8	36188670	33597440	9035390	12447900	54136940	21157890	22329610	27152620	23801760	24895350	5619290	10727460	40528360	24382160	23108520	10795510
Q9BXB4	>Q9BXB4|OSB11_HUMAN Oxysterol-binding protein-related protein 11 |Homo sapiens	2	2	1	1	2	2	0	0	2	2	1	1	2	1	1	0	2640100	2123260	301420	705480	5371200	1948600	0	0	2905540	2417390	542090	258830	5836000	2091400	711970	0
Q15691	>Q15691|MARE1_HUMAN Microtubule-associated protein RP/EB family member 1 |Homo sapiens	2	2	1	2	2	2	1	1	2	2	2	2	2	2	1	1	3729300	2156660	1291600	1610370	2785300	2653040	2020600	1722000	2195670	2084650	1433310	788170	2588400	2592100	1152600	985150
O14579	>O14579|COPE_HUMAN Coatomer subunit epsilon |Homo sapiens	25	30	24	24	23	30	26	25	25	30	29	23	25	30	28	19	247485420	621975860	229959230	156711980	162110490	685174780	357347600	136724680	156365070	824397720	414739260	114721720	189583465	657937440	347093590	81521130
P09622	>P09622|DLDH_HUMAN Dihydrolipoyl dehydrogenase, mitochondrial |Homo sapiens	9	8	8	8	7	7	9	7	7	8	8	7	8	8	6	4	23445240	12462070	10011660	7225760	13084160	22724000	13896140	9329480	8836640	10867890	11003990	4707880	15666664	16123810	7714600	3240690
Q9UJA5	>Q9UJA5|TRM6_HUMAN tRNA (adenine(58)-N(1))-methyltransferase non-catalytic subunit TRM6 |Homo sapiens	2	1	1	0	1	2	0	0	2	1	1	1	2	1	1	0	2323530	677420	274800	0	1047300	1299320	0	0	1309120	424080	410120	299480	1910260	655000	328130	0
Q96ST3	>Q96ST3|SIN3A_HUMAN Paired amphipathic helix protein Sin3a |Homo sapiens	8	14	11	12	13	5	14	11	8	13	7	11	10	12	10	9	4571050	41214810	7195960	14712090	14963050	5803040	37624280	23385820	9687050	34289720	6120140	21318680	9456980	24275390	36407900	11214300
Q13148	>Q13148|TADBP_HUMAN TAR DNA-binding protein 43 |Homo sapiens	4	4	5	4	4	4	4	5	4	3	5	4	3	3	3	3	4019020	4344710	5652360	4774490	3968040	9366000	6326080	6152230	2605570	3670540	5913500	3912370	3165710	4335550	4415700	3036230
P23526	>P23526|SAHH_HUMAN Adenosylhomocysteinase |Homo sapiens	42	40	33	33	41	41	35	33	41	41	35	36	43	37	39	32	1461559520	841078400	180462740	165718700	1343594390	558549500	327712580	276206850	1206056030	697326810	221964960	184034950	1527451710	681272480	435999570	111245130
Q1KMD3	>Q1KMD3|HNRL2_HUMAN Heterogeneous nuclear ribonucleoprotein U-like protein 2 |Homo sapiens	8	7	7	4	8	4	3	4	8	7	7	4	8	8	2	2	34674200	17027030	11139190	3453640	19146250	7781560	3541180	6288660	21252370	13568950	14204060	3168000	27063500	20578740	2227840	1516680
P49770	>P49770|EI2BB_HUMAN Translation initiation factor eIF-2B subunit beta |Homo sapiens	9	7	4	2	9	5	2	2	8	12	11	8	10	8	9	2	13483830	5380880	1312740	1099384	19808270	5801330	3025980	2548130	19268390	59921240	13739670	8257840	24146710	50332900	21019340	3188760
Q9BW83	>Q9BW83|IFT27_HUMAN Intraflagellar transport protein 27 homolog |Homo sapiens	0	0	0	0	0	1	1	0	0	0	1	0	0	0	1	0	0	0	0	0	0	2164800	1482600	0	0	0	2010000	0	0	0	478710	0
P36873;P62140	>P36873|PP1G_HUMAN Serine/threonine-protein phosphatase PP1-gamma catalytic subunit |Homo sapiens;>P62140|PP1B_HUMAN Serine/threonine-protein phosphatase PP1-beta catalytic subunit |Homo sapiens	7	5	7	6	7	6	7	7	5	6	4	6	7	5	5	5	21817550	9871080	6559420	5544200	19545310	18353000	17549450	13491500	8033820	8577560	6414810	6406060	16460830	10201380	9746310	6585910
P17858;Q01813	>P17858|K6PL_HUMAN 6-phosphofructokinase, liver type |Homo sapiens;>Q01813|K6PP_HUMAN 6-phosphofructokinase type C |Homo sapiens	0	0	0	0	0	0	0	0	0	0	0	0	0	0	0	0	0	0	0	0	0	0	0	0	0	0	0	0	0	0	0	0
P68104;Q5VTE0;Q05639	>P68104|EF1A1_HUMAN Elongation factor 1-alpha 1 |Homo sapiens;>Q5VTE0|EF1A3_HUMAN Putative elongation factor 1-alpha-like 3 |Homo sapiens;>Q05639|EF1A2_HUMAN Elongation factor 1-alpha 2 |Homo sapiens	23	22	23	20	24	24	25	23	20	21	23	22	22	23	21	21	1403541400	1885319420	778806080	547330800	1086787600	1969782070	1021083500	532927200	889274570	1903151260	1299218160	672482370	1126781600	1798286560	1319875800	443804760
Q14204	>Q14204|DYHC1_HUMAN Cytoplasmic dynein 1 heavy chain 1 |Homo sapiens	62	247	142	257	168	116	254	260	155	231	89	261	164	210	260	254	40798371	1868830790	173663700	1473752930	337541728	218278304	2641714030	2807775930	334193880	1380025640	92750734	2769550470	313079688	1123117440	3592940692	1470105040
P07195;P00338	>P07195|LDHB_HUMAN L-lactate dehydrogenase B chain |Homo sapiens;>P00338|LDHA_HUMAN L-lactate dehydrogenase A chain |Homo sapiens	3	3	3	3	3	3	3	3	3	3	2	2	3	2	2	3	18017200	12877500	2626290	5012490	19518730	6406910	6572940	9187020	24065900	15066300	4385200	7371980	32376800	20298700	13651400	4363400
P31153;Q00266	>P31153|METK2_HUMAN S-adenosylmethionine synthase isoform type-2 |Homo sapiens;>Q00266|METK1_HUMAN S-adenosylmethionine synthase isoform type-1 |Homo sapiens	5	5	5	5	5	4	3	3	4	5	5	4	5	4	3	4	82364200	37189600	13025630	8365930	59324100	38697520	15481200	10009500	30312600	24293550	11268250	8681550	42595400	30205200	11389400	6556570
Q9BTE3	>Q9BTE3|MCMBP_HUMAN Mini-chromosome maintenance complex-binding protein |Homo sapiens	4	4	0	2	4	0	1	2	4	4	0	2	4	4	2	2	5605900	4630010	0	1063390	9231170	0	729280	1285330	6755900	4057470	0	931810	8508890	4300550	6635400	2683240
Q9UDY4	>Q9UDY4|DNJB4_HUMAN DnaJ homolog subfamily B member 4 |Homo sapiens	1	1	1	1	0	1	0	0	1	1	1	1	1	1	0	1	982660	802330	486610	594910	0	955890	0	0	319320	298600	1045700	703600	468860	482040	0	793980
Q9Y3B2	>Q9Y3B2|EXOS1_HUMAN Exosome complex component CSL4 |Homo sapiens	11	10	11	9	10	12	11	10	10	11	10	9	12	10	10	8	92557600	58974800	24568270	12152790	72467100	102847200	37702760	17008310	47766590	63866700	23275510	8983900	75180570	74623010	28735800	7600260
P09884	>P09884|DPOLA_HUMAN DNA polymerase alpha catalytic subunit |Homo sapiens	7	7	1	1	7	0	2	3	7	6	2	2	6	4	0	0	5341250	5521280	898630	484320	10260330	0	829060	900060	9447790	3976860	1656450	544910	9574200	3712910	0	0
Q3ZCM7;P07437;P68371;Q9BVA1;Q13885;P04350;Q9BUF5	>Q3ZCM7|TBB8_HUMAN Tubulin beta-8 chain |Homo sapiens;>P07437|TBB5_HUMAN Tubulin beta chain |Homo sapiens;>P68371|TBB4B_HUMAN Tubulin beta-4B chain |Homo sapiens;>Q9BVA1|TBB2B_HUMAN Tubulin beta-2B chain |Homo sapiens;>Q13885|TBB2A_HUMAN Tubulin beta-2A ch	1	1	1	1	0	1	1	1	1	1	1	1	1	1	1	1	1112200	2270100	2892500	5363900	0	1273000	3190100	4070800	685870	1472400	2732600	2570400	776290	1488000	2044900	1384900
CON__P60712;P60709;P63261	>P60712 SWISS-PROT:P60712 (Bos taurus) Actin, cytoplasmic 1;>P60709|ACTB_HUMAN Actin, cytoplasmic 1 |Homo sapiens;>P63261|ACTG_HUMAN Actin, cytoplasmic 2 |Homo sapiens	24	24	24	26	25	27	26	25	20	24	26	25	25	23	24	24	1699651700	1761652790	1450616870	2228559770	1926077800	1931214100	2240987600	2595041600	1376968400	1674215630	1992044180	2763138770	1802665330	2034561230	1717703200	1499872400
Q13112	>Q13112|CAF1B_HUMAN Chromatin assembly factor 1 subunit B |Homo sapiens	2	1	1	0	2	2	1	2	2	1	0	1	2	2	1	1	753550	1209800	330970	0	891790	1242740	434500	782210	792560	523410	0	105470	706210	515700	991560	427380
P13797;Q14651	>P13797|PLST_HUMAN Plastin-3 |Homo sapiens;>Q14651|PLSI_HUMAN Plastin-1 |Homo sapiens	0	0	0	0	1	0	0	0	0	0	0	0	0	0	0	0	0	0	0	0	1514800	0	0	0	0	0	0	0	0	0	0	0
O43252;O95340	>O43252|PAPS1_HUMAN Bifunctional 3-phosphoadenosine 5-phosphosulfate synthase 1 |Homo sapiens;>O95340|PAPS2_HUMAN Bifunctional 3-phosphoadenosine 5-phosphosulfate synthase 2 |Homo sapiens	1	1	1	1	1	1	0	1	1	1	0	1	0	1	0	0	1266000	1205000	830340	559670	1174800	955660	0	663040	654820	924850	0	377850	0	871080	0	0
P04264;CON__P04264;P35908;CON__P35908;CON__Q7Z794;Q7Z794;CON__Q6IFZ6;CON__Q6NXH9;CON__Q9R0H5	>P04264|K2C1_HUMAN Keratin, type II cytoskeletal 1 |Homo sapiens;>P04264 SWISS-PROT:P04264 Tax_Id=9606 Gene_Symbol=KRT1 Keratin, type II cytoskeletal 1;>P35908|K22E_HUMAN Keratin, type II cytoskeletal 2 epidermal |Homo sapiens;>P35908 SWISS-PROT:P35908 Tax	1	1	1	1	1	1	1	1	1	1	1	1	1	1	1	1	4610300	6972200	3822900	7559800	3096300	10800000	21964000	7337000	2583700	2704000	6266400	2379400	621600	985980	6726300	10490000
Q9H2M9	>Q9H2M9|RBGPR_HUMAN Rab3 GTPase-activating protein non-catalytic subunit |Homo sapiens	3	4	1	1	4	1	1	3	5	5	0	2	5	1	1	1	1553140	2838630	28425	73202	5198500	65174	438450	1454620	4132340	2005840	0	566180	5686330	1077400	2400300	103030
CON__P12763	>P12763 SWISS-PROT:P12763 (Bos taurus) Alpha-2-HS-glycoprotein precursor	9	7	8	6	7	7	8	7	5	5	6	3	7	6	6	8	39464010	28309560	26319800	15570650	15451130	33053300	26878120	20179890	8973170	11149840	11440650	4212720	16823500	19788470	13147640	9738100
CON__P13645;P13645	>P13645 SWISS-PROT:P13645 Tax_Id=9606 Gene_Symbol=KRT10 Keratin, type I cytoskeletal 10;>P13645|K1C10_HUMAN Keratin, type I cytoskeletal 10 |Homo sapiens	9	6	9	9	5	9	10	9	5	5	9	5	1	0	8	8	6938390	7473080	8049210	12196780	3029316	22363140	65243140	24001390	4127373	7968040	24518510	5556020	386680	0	17954570	8776191
P38646	>P38646|GRP75_HUMAN Stress-70 protein, mitochondrial |Homo sapiens	29	29	31	28	29	33	28	25	26	30	31	30	28	25	26	30	203413370	164778570	152462430	117762390	130085630	274792430	175270920	116540130	121845750	163808520	202069260	124241490	171754260	162096640	183276120	120568310
O14737	>O14737|PDCD5_HUMAN Programmed cell death protein 5 |Homo sapiens	1	2	2	2	1	0	2	2	3	2	2	1	2	1	1	2	2914900	1726260	2828510	3990600	2718600	0	5602500	3515100	3599190	2334620	2565920	1184100	2588070	2081400	3369600	3361650
P41091;Q2VIR3	>P41091|IF2G_HUMAN Eukaryotic translation initiation factor 2 subunit 3 |Homo sapiens;>Q2VIR3|IF2GL_HUMAN Putative eukaryotic translation initiation factor 2 subunit 3-like protein |Homo sapiens	4	4	4	4	3	2	2	2	4	3	3	3	4	4	3	2	10355300	6475830	2859060	4025790	15520700	4539000	3949600	3916300	8273800	6423900	4230960	3682200	8791000	11504100	5819100	3114000
CON__P60712;P60709;P63261;P68032;P68133;P62736;P63267;Q562R1	>P60712 SWISS-PROT:P60712 (Bos taurus) Actin, cytoplasmic 1;>P60709|ACTB_HUMAN Actin, cytoplasmic 1 |Homo sapiens;>P63261|ACTG_HUMAN Actin, cytoplasmic 2 |Homo sapiens;>P68032|ACTC_HUMAN Actin, alpha cardiac muscle 1 |Homo sapiens;>P68133|ACTS_HUMAN Actin,	16	16	17	18	18	18	18	18	16	17	17	18	18	17	19	18	623019360	434974200	375337200	575336950	424260900	652601100	520530400	609393030	407978160	472099650	592397610	738683330	518750050	596174350	762572000	510498200
P15924	>P15924|DESP_HUMAN Desmoplakin |Homo sapiens	2	2	0	2	3	1	1	2	3	4	2	2	2	2	2	1	934410	1246950	0	1391030	1621580	450760	2518000	2293370	2854430	3110530	1120080	1120180	2447700	1462340	2066330	917800
O43823	>O43823|AKAP8_HUMAN A-kinase anchor protein 8 |Homo sapiens	3	3	3	3	2	2	2	2	2	3	3	3	2	2	0	1	2342360	1376940	1462540	1771430	811710	892140	1321900	1301280	1157250	1583890	1666120	1004500	1586260	1370020	0	551830
Q96Q15	>Q96Q15|SMG1_HUMAN Serine/threonine-protein kinase SMG1 |Homo sapiens	0	2	0	1	0	0	1	1	1	2	0	1	1	2	2	2	0	5100680	0	1333500	0	0	2059800	1653200	459200	5006560	0	1693800	383550	3095360	5076810	1501980
Q14498	>Q14498|RBM39_HUMAN RNA-binding protein 39 |Homo sapiens	6	6	6	6	5	6	6	6	5	5	6	6	7	6	6	4	7731100	7192690	9270240	10546010	8782180	14645110	16484900	16655590	4166460	5669450	11459100	10666270	8157900	8794560	9631500	7006800
Q9Y3R4	>Q9Y3R4|NEUR2_HUMAN Sialidase-2 |Homo sapiens	2	2	2	2	2	2	1	2	2	2	2	2	3	2	2	2	35111500	36324200	29562700	38058000	58683400	46652300	6386000	48463200	30751400	50402000	43235600	32440400	47289400	42440300	46439800	41859700
Q8TD16	>Q8TD16|BICD2_HUMAN Protein bicaudal D homolog 2 |Homo sapiens	1	0	0	0	1	0	0	0	1	0	0	0	0	0	0	0	283670	0	0	0	141530	0	0	0	188870	0	0	0	0	0	0	0
O60610	>O60610|DIAP1_HUMAN Protein diaphanous homolog 1 |Homo sapiens	6	4	4	3	5	5	4	5	7	4	4	5	5	5	5	4	9166760	5795470	2164810	2413390	8219200	5045210	6998620	6547980	10757450	4358040	2025620	4767510	11375040	8275530	8840430	3102800
Q9H871	>Q9H871|RMD5A_HUMAN Protein RMD5 homolog A |Homo sapiens	0	1	1	4	0	0	2	4	0	0	2	4	1	1	1	3	0	639340	425470	9229080	0	0	1480500	15008100	0	0	1372250	9498080	83036	157330	1054600	6347000
P07814	>P07814|SYEP_HUMAN Bifunctional glutamate/proline--tRNA ligase |Homo sapiens	93	116	110	125	106	97	122	132	94	117	122	127	97	103	107	127	179742130	566917846	234545980	852287720	279634192	267971884	875779657	1608273470	248328420	507653130	578804610	1197618580	259334181	440794740	607228278	580302390
Q8TC07	>Q8TC07|TBC15_HUMAN TBC1 domain family member 15 |Homo sapiens	1	1	0	1	1	0	1	1	2	1	0	0	1	1	0	0	327690	313590	0	237010	859530	0	526250	674550	1483360	461250	0	0	592810	278360	0	0
P35251	>P35251|RFC1_HUMAN Replication factor C subunit 1 |Homo sapiens	8	4	7	3	7	5	6	7	7	6	7	4	7	5	2	0	8547450	2990110	2639980	1225490	5545610	2956850	3899160	5578120	4477370	2877670	3085600	1701570	5466790	3236570	2040750	0
P68032;P68133;P62736;P63267	>P68032|ACTC_HUMAN Actin, alpha cardiac muscle 1 |Homo sapiens;>P68133|ACTS_HUMAN Actin, alpha skeletal muscle |Homo sapiens;>P62736|ACTA_HUMAN Actin, aortic smooth muscle |Homo sapiens;>P63267|ACTH_HUMAN Actin, gamma-enteric smooth muscle |Homo sapiens	4	4	4	4	4	5	4	4	4	4	4	4	4	4	5	5	81230200	76036200	44605200	60141200	70410800	89199800	111831000	106428200	45320660	64469300	45440200	77697200	59535000	72114200	62161800	55773800
O94776;Q9BTC8;Q13330	>O94776|MTA2_HUMAN Metastasis-associated protein MTA2 |Homo sapiens;>Q9BTC8|MTA3_HUMAN Metastasis-associated protein MTA3 |Homo sapiens;>Q13330|MTA1_HUMAN Metastasis-associated protein MTA1 |Homo sapiens	4	3	4	4	1	3	3	2	2	3	3	4	1	3	3	4	5206400	11360800	11608980	7243530	1476200	10713600	14318200	5870700	3161890	22753400	15904300	7540630	2180900	11579200	21588300	7701200
P35637	>P35637|FUS_HUMAN RNA-binding protein FUS |Homo sapiens	0	0	0	1	1	1	1	0	1	0	0	0	0	0	1	0	0	0	0	320060	985930	3926200	2222500	0	310370	0	0	0	0	0	1399500	0
[truncated: 500 more rows]
