# Supplementary material for: Pharmacological dimerization and activation of the exchange factor eIF2B antagonizes the integrated stress response
Source: eLife. 2015 Apr 15;4:e07314. doi: 10.7554/eLife.07314 (PMC4426669; doi:10.7554/eLife.07314)
Supplement: Figure 3—source data 2. — DOI: http://dx.doi.org/10.7554/eLife.07314.010 [file elife07314s004.xlsx]

## Sheet: Sheet1
Description	Correlation Coefficient (R)
>Q9UI10|EI2BD_HUMAN Translation initiation factor eIF-2B subunit delta |Homo sapiens	1
>P49770|EI2BB_HUMAN Translation initiation factor eIF-2B subunit beta |Homo sapiens	0.993482
>Q13144|EI2BE_HUMAN Translation initiation factor eIF-2B subunit epsilon |Homo sapiens	0.991315
>Q9NR50|EI2BG_HUMAN Translation initiation factor eIF-2B subunit gamma |Homo sapiens	0.983605
>Q14232|EI2BA_HUMAN Translation initiation factor eIF-2B subunit alpha |Homo sapiens	0.97869
>Q96A65|EXOC4_HUMAN Exocyst complex component 4 |Homo sapiens	0.949858
>O60231|DHX16_HUMAN Putative pre-mRNA-splicing factor ATP-dependent RNA helicase DHX16 |Homo sapiens	0.939384
>O60645|EXOC3_HUMAN Exocyst complex component 3 |Homo sapiens	0.935798
>Q9Y2V7|COG6_HUMAN Conserved oligomeric Golgi complex subunit 6 |Homo sapiens	0.935757
>Q9BWH6|RPAP1_HUMAN RNA polymerase II-associated protein 1 |Homo sapiens	0.932117
>Q5T1M5|FKB15_HUMAN FK506-binding protein 15 |Homo sapiens	0.927518
>P49815|TSC2_HUMAN Tuberin |Homo sapiens	0.915191
>Q86XI2|CNDG2_HUMAN Condensin-2 complex subunit G2 |Homo sapiens	0.913622
>P51157|RAB28_HUMAN Ras-related protein Rab-28 |Homo sapiens	0.901829
>Q9NV70|EXOC1_HUMAN Exocyst complex component 1 |Homo sapiens	0.901725
>Q14746|COG2_HUMAN Conserved oligomeric Golgi complex subunit 2 |Homo sapiens	0.8884
>Q96JB2|COG3_HUMAN Conserved oligomeric Golgi complex subunit 3 |Homo sapiens	0.883212
>Q9H9E3|COG4_HUMAN Conserved oligomeric Golgi complex subunit 4 |Homo sapiens	0.882697
>O43615|TIM44_HUMAN Mitochondrial import inner membrane translocase subunit TIM44 |Homo sapiens	0.87895
>Q658Y4|F91A1_HUMAN Protein FAM91A1 |Homo sapiens	0.877976
>Q9BZH6|WDR11_HUMAN WD repeat-containing protein 11 |Homo sapiens	0.877366
>Q9UPT5|EXOC7_HUMAN Exocyst complex component 7 |Homo sapiens	0.876715
>Q8WTW3|COG1_HUMAN Conserved oligomeric Golgi complex subunit 1 |Homo sapiens	0.875166
>P52732|KIF11_HUMAN Kinesin-like protein KIF11 |Homo sapiens	0.875033
>Q8NFC6|BOD1L_HUMAN Biorientation of chromosomes in cell division protein 1-like |Homo sapiens;>Q96IK1|BOD1_HUMAN Biorientation of chromosomes in cell division protein 1 |Homo sapiens	0.871151
>Q8NB46|ANR52_HUMAN Serine/threonine-protein phosphatase 6 regulatory ankyrin repeat subunit C |Homo sapiens	0.869186
>P52294|IMA1_HUMAN Importin subunit alpha-1 |Homo sapiens;>O60684|IMA7_HUMAN Importin subunit alpha-7 |Homo sapiens	0.868502
>Q8IYI6|EXOC8_HUMAN Exocyst complex component 8 |Homo sapiens	0.867583
>P23527|H2B1O_HUMAN Histone H2B type 1-O |Homo sapiens;>P33778|H2B1B_HUMAN Histone H2B type 1-B |Homo sapiens;>Q16778|H2B2E_HUMAN Histone H2B type 2-E |Homo sapiens;>Q6DN03|H2B2C_HUMAN Putative histone H2B type 2-C |Homo sapiens;>Q6DRA6|H2B2D_HUMAN Putativ	0.867071
>Q96AX1|VP33A_HUMAN Vacuolar protein sorting-associated protein 33A |Homo sapiens	0.864461
>Q6W2J9|BCOR_HUMAN BCL-6 corepressor |Homo sapiens	0.863838
>P63167|DYL1_HUMAN Dynein light chain 1, cytoplasmic |Homo sapiens;>Q96FJ2|DYL2_HUMAN Dynein light chain 2, cytoplasmic |Homo sapiens	0.861269
>Q96MW5|COG8_HUMAN Conserved oligomeric Golgi complex subunit 8 |Homo sapiens	0.856732
>Q8TAG9|EXOC6_HUMAN Exocyst complex component 6 |Homo sapiens;>Q9Y2D4|EXC6B_HUMAN Exocyst complex component 6B |Homo sapiens	0.844707
>O60684|IMA7_HUMAN Importin subunit alpha-7 |Homo sapiens	0.840262
>O60684|IMA7_HUMAN Importin subunit alpha-7 |Homo sapiens;>O15131|IMA5_HUMAN Importin subunit alpha-6 |Homo sapiens	0.836702
>O15381|NVL_HUMAN Nuclear valosin-containing protein-like |Homo sapiens	0.831611
>Q9UBF2|COPG2_HUMAN Coatomer subunit gamma-2 |Homo sapiens	0.82993
>P52292|IMA2_HUMAN Importin subunit alpha-2 |Homo sapiens;>A8MYJ9|IMA2L_HUMAN Importin subunit alpha-2-like protein |Homo sapiens	0.826538
>Q567U6|CCD93_HUMAN Coiled-coil domain-containing protein 93 |Homo sapiens	0.824535
>Q9UHB9|SRP68_HUMAN Signal recognition particle 68 kDa protein |Homo sapiens	0.820349
>Q8N8A6|DDX51_HUMAN ATP-dependent RNA helicase DDX51 |Homo sapiens	0.819891
>P83436|COG7_HUMAN Conserved oligomeric Golgi complex subunit 7 |Homo sapiens	0.817885
>O60763|USO1_HUMAN General vesicular transport factor p115 |Homo sapiens	0.81618
>P35573|GDE_HUMAN Glycogen debranching enzyme |Homo sapiens	0.814396
>Q9NTJ3|SMC4_HUMAN Structural maintenance of chromosomes protein 4 |Homo sapiens	0.810495
>P42345|MTOR_HUMAN Serine/threonine-protein kinase mTOR |Homo sapiens	0.808979
>Q9NZM4|GSCR1_HUMAN Glioma tumor suppressor candidate region gene 1 protein |Homo sapiens	0.808362
>Q9BPX3|CND3_HUMAN Condensin complex subunit 3 |Homo sapiens	0.807198
>O15084|ANR28_HUMAN Serine/threonine-protein phosphatase 6 regulatory ankyrin repeat subunit A |Homo sapiens	0.800195
>O60271|JIP4_HUMAN C-Jun-amino-terminal kinase-interacting protein 4 |Homo sapiens	0.796583
>Q9Y678|COPG_HUMAN Coatomer subunit gamma |Homo sapiens	0.795335
>P53621|COPA_HUMAN Coatomer subunit alpha |Homo sapiens	0.795199
>Q9NSE4|SYIM_HUMAN Isoleucine--tRNA ligase, mitochondrial |Homo sapiens	0.794048
>Q93008|USP9X_HUMAN Probable ubiquitin carboxyl-terminal hydrolase FAF-X |Homo sapiens	0.791666
>P52292|IMA2_HUMAN Importin subunit alpha-2 |Homo sapiens	0.791443
>Q15021|CND1_HUMAN Condensin complex subunit 1 |Homo sapiens	0.784838
>Q15269|PWP2_HUMAN Periodic tryptophan protein 2 homolog |Homo sapiens	0.781974
>Q9UP83|COG5_HUMAN Conserved oligomeric Golgi complex subunit 5 |Homo sapiens	0.781578
>Q14974|IMB1_HUMAN Importin subunit beta-1 |Homo sapiens	0.778189
>P49736|MCM2_HUMAN DNA replication licensing factor MCM2 |Homo sapiens	0.777227
>Q5JSL3|DOC11_HUMAN Dedicator of cytokinesis protein 11 |Homo sapiens	0.776838
>Q7Z392|TPC11_HUMAN Trafficking protein particle complex subunit 11 |Homo sapiens	0.773518
>P41208|CETN2_HUMAN Centrin-2 |Homo sapiens	0.772018
>P26641|EF1G_HUMAN Elongation factor 1-gamma |Homo sapiens	0.768466
>Q8NI36|WDR36_HUMAN WD repeat-containing protein 36 |Homo sapiens	0.763707
>P33993|MCM7_HUMAN DNA replication licensing factor MCM7 |Homo sapiens	0.760288
>Q9UDR5|AASS_HUMAN Alpha-aminoadipic semialdehyde synthase, mitochondrial |Homo sapiens	0.759706
>P58107|EPIPL_HUMAN Epiplakin |Homo sapiens	0.759503
>P52294|IMA1_HUMAN Importin subunit alpha-1 |Homo sapiens	0.7531
>O00471|EXOC5_HUMAN Exocyst complex component 5 |Homo sapiens	0.751278
>P42285|SK2L2_HUMAN Superkiller viralicidic activity 2-like 2 |Homo sapiens	0.750548
>O60826|CCD22_HUMAN Coiled-coil domain-containing protein 22 |Homo sapiens	0.745026
>Q9BTC8|MTA3_HUMAN Metastasis-associated protein MTA3 |Homo sapiens	0.743397
>P22234|PUR6_HUMAN Multifunctional protein ADE2 |Homo sapiens	0.742956
>Q92817|EVPL_HUMAN Envoplakin |Homo sapiens	0.742234
>Q8TF46|DI3L1_HUMAN DIS3-like exonuclease 1 |Homo sapiens	0.739896
>Q8NBJ5|GT251_HUMAN Procollagen galactosyltransferase 1 |Homo sapiens	0.729312
>P42695|CNDD3_HUMAN Condensin-2 complex subunit D3 |Homo sapiens	0.729073
>P05091|ALDH2_HUMAN Aldehyde dehydrogenase, mitochondrial |Homo sapiens;>P00352|AL1A1_HUMAN Retinal dehydrogenase 1 |Homo sapiens	0.727472
>Q6ZMK1|CYHR1_HUMAN Cysteine and histidine-rich protein 1 |Homo sapiens	0.726301
>Q9P0W2|HM20B_HUMAN SWI/SNF-related matrix-associated actin-dependent regulator of chromatin subfamily E member 1-related |Homo sapiens	0.725817
>O95347|SMC2_HUMAN Structural maintenance of chromosomes protein 2 |Homo sapiens	0.72444
>Q12788|TBL3_HUMAN Transducin beta-like protein 3 |Homo sapiens	0.719413
>Q9BXP5|SRRT_HUMAN Serrate RNA effector molecule homolog |Homo sapiens	0.716946
>P13716|HEM2_HUMAN Delta-aminolevulinic acid dehydratase |Homo sapiens	0.714387
>O43617|TPPC3_HUMAN Trafficking protein particle complex subunit 3 |Homo sapiens	0.712552
>P0CG13|CTF8_HUMAN Chromosome transmission fidelity protein 8 homolog |Homo sapiens	0.711827
>Q5H9R7|PP6R3_HUMAN Serine/threonine-protein phosphatase 6 regulatory subunit 3 |Homo sapiens	0.708409
>Q8N3C0|HELC1_HUMAN Activating signal cointegrator 1 complex subunit 3 |Homo sapiens	0.707133
>P60712 SWISS-PROT:P60712 (Bos taurus) Actin, cytoplasmic 1;>P60709|ACTB_HUMAN Actin, cytoplasmic 1 |Homo sapiens;>Q6S8J3|POTEE_HUMAN POTE ankyrin domain family member E |Homo sapiens;>A5A3E0|POTEF_HUMAN POTE ankyrin domain family member F |Homo sapiens;>P	0.70525
>O75165|DJC13_HUMAN DnaJ homolog subfamily C member 13 |Homo sapiens	0.704893
>Q9NRR5|UBQL4_HUMAN Ubiquilin-4 |Homo sapiens;>Q9UMX0|UBQL1_HUMAN Ubiquilin-1 |Homo sapiens;>Q9UHD9|UBQL2_HUMAN Ubiquilin-2 |Homo sapiens	0.702362
>P35606|COPB2_HUMAN Coatomer subunit beta |Homo sapiens	0.701772
>Q12888|TP53B_HUMAN Tumor suppressor p53-binding protein 1 |Homo sapiens	0.697596
>Q9UNX4|WDR3_HUMAN WD repeat-containing protein 3 |Homo sapiens	0.696846
>P68431|H31_HUMAN Histone H3.1 |Homo sapiens;>P84243|H33_HUMAN Histone H3.3 |Homo sapiens;>Q16695|H31T_HUMAN Histone H3.1t |Homo sapiens;>Q71DI3|H32_HUMAN Histone H3.2 |Homo sapiens	0.696097
>Q5UIP0|RIF1_HUMAN Telomere-associated protein RIF1 |Homo sapiens	0.695666
>Q15022|SUZ12_HUMAN Polycomb protein SUZ12 |Homo sapiens	0.69546
>P36776|LONM_HUMAN Lon protease homolog, mitochondrial |Homo sapiens	0.692949
>O14980|XPO1_HUMAN Exportin-1 |Homo sapiens	0.692114
>Q9P2Y5|UVRAG_HUMAN UV radiation resistance-associated gene protein |Homo sapiens	0.692038
>Q9H4L5|OSBL3_HUMAN Oxysterol-binding protein-related protein 3 |Homo sapiens	0.691372
>Q15024|EXOS7_HUMAN Exosome complex component RRP42 |Homo sapiens	0.690073
>Q15477|SKIV2_HUMAN Helicase SKI2W |Homo sapiens	0.688592
>Q01433|AMPD2_HUMAN AMP deaminase 2 |Homo sapiens	0.688518
>Q15393|SF3B3_HUMAN Splicing factor 3B subunit 3 |Homo sapiens	0.687141
>Q9H7Z7|PGES2_HUMAN Prostaglandin E synthase 2 |Homo sapiens	0.687053
>Q9H0A8|COMD4_HUMAN COMM domain-containing protein 4 |Homo sapiens	0.68676
>Q9Y678|COPG_HUMAN Coatomer subunit gamma |Homo sapiens;>Q9UBF2|COPG2_HUMAN Coatomer subunit gamma-2 |Homo sapiens	0.683793
>Q13123|RED_HUMAN Protein Red |Homo sapiens	0.683675
>O75533|SF3B1_HUMAN Splicing factor 3B subunit 1 |Homo sapiens	0.683332
>Q9NQT5|EXOS3_HUMAN Exosome complex component RRP40 |Homo sapiens	0.683314
>Q14566|MCM6_HUMAN DNA replication licensing factor MCM6 |Homo sapiens	0.681525
>Q9NQT4|EXOS5_HUMAN Exosome complex component RRP46 |Homo sapiens	0.680183
>Q9NR30|DDX21_HUMAN Nucleolar RNA helicase 2 |Homo sapiens	0.678762
>P53618|COPB_HUMAN Coatomer subunit beta |Homo sapiens	0.678746
>P07900|HS90A_HUMAN Heat shock protein HSP 90-alpha |Homo sapiens;>P08238|HS90B_HUMAN Heat shock protein HSP 90-beta |Homo sapiens;>Q58FF8|H90B2_HUMAN Putative heat shock protein HSP 90-beta 2 |Homo sapiens	0.675076
>P15924|DESP_HUMAN Desmoplakin |Homo sapiens	0.674527
>Q13033|STRN3_HUMAN Striatin-3 |Homo sapiens	0.673943
>Q5TAQ9|DCAF8_HUMAN DDB1- and CUL4-associated factor 8 |Homo sapiens;>P0C7V8|DC8L2_HUMAN DDB1- and CUL4-associated factor 8-like protein 2 |Homo sapiens;>A6NGE4|DC8L1_HUMAN DDB1- and CUL4-associated factor 8-like protein 1 |Homo sapiens	0.673772
>Q9Y2L5|TPPC8_HUMAN Trafficking protein particle complex subunit 8 |Homo sapiens	0.673551
>Q96C36|P5CR2_HUMAN Pyrroline-5-carboxylate reductase 2 |Homo sapiens	0.672588
>Q8NCM8|DYHC2_HUMAN Cytoplasmic dynein 2 heavy chain 1 |Homo sapiens	0.669951
>Q9HAS0|NJMU_HUMAN Protein Njmu-R1 |Homo sapiens	0.669405
>Q16643|DREB_HUMAN Drebrin |Homo sapiens	0.665654
>Q01780|EXOSX_HUMAN Exosome component 10 |Homo sapiens	0.665519
>Q13618|CUL3_HUMAN Cullin-3 |Homo sapiens	0.663242
>Q9HCN4|GPN1_HUMAN GPN-loop GTPase 1 |Homo sapiens	0.661568
>P68104|EF1A1_HUMAN Elongation factor 1-alpha 1 |Homo sapiens;>Q05639|EF1A2_HUMAN Elongation factor 1-alpha 2 |Homo sapiens	0.659865
>P62241|RS8_HUMAN 40S ribosomal protein S8 |Homo sapiens	0.658614
>Q96C36|P5CR2_HUMAN Pyrroline-5-carboxylate reductase 2 |Homo sapiens;>P32322|P5CR1_HUMAN Pyrroline-5-carboxylate reductase 1, mitochondrial |Homo sapiens	0.656708
>Q96JJ3|ELMO2_HUMAN Engulfment and cell motility protein 2 |Homo sapiens	0.656576
>P08107|HSP71_HUMAN Heat shock 70 kDa protein 1A/1B |Homo sapiens;>P17066|HSP76_HUMAN Heat shock 70 kDa protein 6 |Homo sapiens;>P48741|HSP77_HUMAN Putative heat shock 70 kDa protein 7 |Homo sapiens	0.654415
>Q9H270|VPS11_HUMAN Vacuolar protein sorting-associated protein 11 homolog |Homo sapiens	0.651734
>P30626|SORCN_HUMAN Sorcin |Homo sapiens	0.649359
>Q14166|TTL12_HUMAN Tubulin--tyrosine ligase-like protein 12 |Homo sapiens	0.648334
>Q9P000|COMD9_HUMAN COMM domain-containing protein 9 |Homo sapiens	0.647168
>P63167|DYL1_HUMAN Dynein light chain 1, cytoplasmic |Homo sapiens	0.644814
>Q7L014|DDX46_HUMAN Probable ATP-dependent RNA helicase DDX46 |Homo sapiens	0.644233
>P23610|F8I2_HUMAN Factor VIII intron 22 protein |Homo sapiens	0.64028
>O00571|DDX3X_HUMAN ATP-dependent RNA helicase DDX3X |Homo sapiens;>O15523|DDX3Y_HUMAN ATP-dependent RNA helicase DDX3Y |Homo sapiens;>Q9NQI0|DDX4_HUMAN Probable ATP-dependent RNA helicase DDX4 |Homo sapiens	0.638563
>O43379|WDR62_HUMAN WD repeat-containing protein 62 |Homo sapiens	0.636052
>Q15020|SART3_HUMAN Squamous cell carcinoma antigen recognized by T-cells 3 |Homo sapiens	0.63364
>Q76FK4|NOL8_HUMAN Nucleolar protein 8 |Homo sapiens	0.633624
>Q8NEB9|PK3C3_HUMAN Phosphatidylinositol 3-kinase catalytic subunit type 3 |Homo sapiens	0.632343
>P07900|HS90A_HUMAN Heat shock protein HSP 90-alpha |Homo sapiens;>Q58FG1|HS904_HUMAN Putative heat shock protein HSP 90-alpha A4 |Homo sapiens	0.632292
>Q8N3U4|STAG2_HUMAN Cohesin subunit SA-2 |Homo sapiens;>Q8WVM7|STAG1_HUMAN Cohesin subunit SA-1 |Homo sapiens	0.630432
>Q9UI12|VATH_HUMAN V-type proton ATPase subunit H |Homo sapiens	0.63037
>Q3SYG4|PTHB1_HUMAN Protein PTHB1 |Homo sapiens	0.630301
>P68104|EF1A1_HUMAN Elongation factor 1-alpha 1 |Homo sapiens	0.629266
>Q8N9N2|ASCC1_HUMAN Activating signal cointegrator 1 complex subunit 1 |Homo sapiens	0.62727
>P51659|DHB4_HUMAN Peroxisomal multifunctional enzyme type 2 |Homo sapiens	0.627084
>P61011|SRP54_HUMAN Signal recognition particle 54 kDa protein |Homo sapiens	0.625165
>P50502|F10A1_HUMAN Hsc70-interacting protein |Homo sapiens	0.623525
>O75323|NIPS2_HUMAN Protein NipSnap homolog 2 |Homo sapiens	0.622616
>Q9NRW7|VPS45_HUMAN Vacuolar protein sorting-associated protein 45 |Homo sapiens	0.620695
>Q9UPN7|PP6R1_HUMAN Serine/threonine-protein phosphatase 6 regulatory subunit 1 |Homo sapiens	0.619291
>P55786|PSA_HUMAN Puromycin-sensitive aminopeptidase |Homo sapiens;>A6NEC2|PSAL_HUMAN Puromycin-sensitive aminopeptidase-like protein |Homo sapiens	0.618173
>P33991|MCM4_HUMAN DNA replication licensing factor MCM4 |Homo sapiens	0.61809
>Q96SU4|OSBL9_HUMAN Oxysterol-binding protein-related protein 9 |Homo sapiens	0.617232
>P07195|LDHB_HUMAN L-lactate dehydrogenase B chain |Homo sapiens;>P00338|LDHA_HUMAN L-lactate dehydrogenase A chain |Homo sapiens	0.615782
>Q9NU22|MDN1_HUMAN Midasin |Homo sapiens	0.613396
>P49792|RBP2_HUMAN E3 SUMO-protein ligase RanBP2 |Homo sapiens;>P0DJD1|RGPD2_HUMAN RANBP2-like and GRIP domain-containing protein 2 |Homo sapiens;>P0DJD0|RGPD1_HUMAN RANBP2-like and GRIP domain-containing protein 1 |Homo sapiens;>A6NKT7|RGPD3_HUMAN RanBP2-	0.612679
>P41208|CETN2_HUMAN Centrin-2 |Homo sapiens;>Q12798|CETN1_HUMAN Centrin-1 |Homo sapiens	0.611985
>Q02809|PLOD1_HUMAN Procollagen-lysine,2-oxoglutarate 5-dioxygenase 1 |Homo sapiens	0.611839
>Q06265|EXOS9_HUMAN Exosome complex component RRP45 |Homo sapiens	0.611804
>Q9Y4E1|FA21C_HUMAN WASH complex subunit FAM21C |Homo sapiens;>Q5SRD0|FA21D_HUMAN Putative WASH complex subunit FAM21 |Homo sapiens;>Q641Q2|FA21A_HUMAN WASH complex subunit FAM21A |Homo sapiens;>Q5SNT6|FA21B_HUMAN WASH complex subunit FAM21B |Homo sapiens	0.610111
>Q9BXS5|AP1M1_HUMAN AP-1 complex subunit mu-1 |Homo sapiens	0.608498
>Q5RKV6|EXOS6_HUMAN Exosome complex component MTR3 |Homo sapiens	0.607933
>Q01082|SPTB2_HUMAN Spectrin beta chain, brain 1 |Homo sapiens	0.607357
>Q9BQ39|DDX50_HUMAN ATP-dependent RNA helicase DDX50 |Homo sapiens	0.605025
>Q9P2K2|TXD16_HUMAN Thioredoxin domain-containing protein 16 |Homo sapiens	0.603738
>Q99547|MPH6_HUMAN M-phase phosphoprotein 6 |Homo sapiens	0.603151
>Q86XP3|DDX42_HUMAN ATP-dependent RNA helicase DDX42 |Homo sapiens	0.602553
>Q7L2J0|MEPCE_HUMAN 7SK snRNA methylphosphate capping enzyme |Homo sapiens	0.601247
>Q8WYP5|ELYS_HUMAN Protein ELYS |Homo sapiens	0.600167
>Q9NX08|COMD8_HUMAN COMM domain-containing protein 8 |Homo sapiens	0.600157
>Q9H0H5|RGAP1_HUMAN Rac GTPase-activating protein 1 |Homo sapiens	0.599663
>Q96S55|WRIP1_HUMAN ATPase WRNIP1 |Homo sapiens	0.599599
>O94763|RMP_HUMAN Unconventional prefoldin RPB5 interactor 1 |Homo sapiens	0.599024
>Q9UKF6|CPSF3_HUMAN Cleavage and polyadenylation specificity factor subunit 3 |Homo sapiens	0.599
>Q92793|CBP_HUMAN CREB-binding protein |Homo sapiens;>Q09472|EP300_HUMAN Histone acetyltransferase p300 |Homo sapiens	0.597915
>P78406|RAE1L_HUMAN mRNA export factor |Homo sapiens	0.596474
>Q9Y580|RBM7_HUMAN RNA-binding protein 7 |Homo sapiens	0.595516
>Q12840|KIF5A_HUMAN Kinesin heavy chain isoform 5A |Homo sapiens;>O60282|KIF5C_HUMAN Kinesin heavy chain isoform 5C |Homo sapiens	0.594683
>Q13085|ACACA_HUMAN Acetyl-CoA carboxylase 1 |Homo sapiens	0.594343
>P24941|CDK2_HUMAN Cyclin-dependent kinase 2 |Homo sapiens;>Q14004|CDK13_HUMAN Cyclin-dependent kinase 13 |Homo sapiens;>Q9NYV4|CDK12_HUMAN Cyclin-dependent kinase 12 |Homo sapiens;>Q00537|CDK17_HUMAN Cyclin-dependent kinase 17 |Homo sapiens;>Q00536|CDK16_	0.593821
>P42858|HD_HUMAN Huntingtin |Homo sapiens	0.593642
>Q13363|CTBP1_HUMAN C-terminal-binding protein 1 |Homo sapiens	0.592927
>Q15003|CND2_HUMAN Condensin complex subunit 2 |Homo sapiens	0.592217
>Q9NRR5|UBQL4_HUMAN Ubiquilin-4 |Homo sapiens	0.591767
>O60216|RAD21_HUMAN Double-strand-break repair protein rad21 homolog |Homo sapiens;>Q9H4I0|RD21L_HUMAN Double-strand-break repair protein rad21-like protein 1 |Homo sapiens	0.591342
>P54886|P5CS_HUMAN Delta-1-pyrroline-5-carboxylate synthase |Homo sapiens	0.591115
>O60216|RAD21_HUMAN Double-strand-break repair protein rad21 homolog |Homo sapiens	0.59052
>Q12789|TF3C1_HUMAN General transcription factor 3C polypeptide 1 |Homo sapiens	0.586152
>Q13395|TARB1_HUMAN Probable methyltransferase TARBP1 |Homo sapiens	0.58549
>O15131|IMA5_HUMAN Importin subunit alpha-6 |Homo sapiens	0.582229
>O76094|SRP72_HUMAN Signal recognition particle 72 kDa protein |Homo sapiens	0.581728
>Q96F07|CYFP2_HUMAN Cytoplasmic FMR1-interacting protein 2 |Homo sapiens	0.581082
>O00743|PPP6_HUMAN Serine/threonine-protein phosphatase 6 catalytic subunit |Homo sapiens	0.581067
>Q9H6T3|RPAP3_HUMAN RNA polymerase II-associated protein 3 |Homo sapiens	0.580335
>Q9C005|DPY30_HUMAN Protein dpy-30 homolog |Homo sapiens	0.576539
>Q13564|ULA1_HUMAN NEDD8-activating enzyme E1 regulatory subunit |Homo sapiens	0.57651
>P00492|HPRT_HUMAN Hypoxanthine-guanine phosphoribosyltransferase |Homo sapiens	0.575717
>P67775|PP2AA_HUMAN Serine/threonine-protein phosphatase 2A catalytic subunit alpha isoform |Homo sapiens	0.573986
>Q7L5N1|CSN6_HUMAN COP9 signalosome complex subunit 6 |Homo sapiens	0.573604
>Q9NWS0|PIHD1_HUMAN PIH1 domain-containing protein 1 |Homo sapiens	0.572906
>Q9NQR4|NIT2_HUMAN Omega-amidase NIT2 |Homo sapiens	0.571806
>O00629|IMA4_HUMAN Importin subunit alpha-4 |Homo sapiens;>O00505|IMA3_HUMAN Importin subunit alpha-3 |Homo sapiens	0.569739
>Q12769|NU160_HUMAN Nuclear pore complex protein Nup160 |Homo sapiens	0.567535
>O60502|NCOAT_HUMAN Bifunctional protein NCOAT |Homo sapiens	0.566508
>Q15650|TRIP4_HUMAN Activating signal cointegrator 1 |Homo sapiens	0.566415
>Q9BVI4|NOC4L_HUMAN Nucleolar complex protein 4 homolog |Homo sapiens	0.5645
>Q15018|F175B_HUMAN BRISC complex subunit Abro1 |Homo sapiens	0.56416
>Q9UL33|TPC2L_HUMAN Trafficking protein particle complex subunit 2-like protein |Homo sapiens	0.564099
>O15294|OGT1_HUMAN UDP-N-acetylglucosamine--peptide N-acetylglucosaminyltransferase 110 kDa subunit |Homo sapiens	0.563039
>Q7KZ85|SPT6H_HUMAN Transcription elongation factor SPT6 |Homo sapiens	0.562543
>P78344|IF4G2_HUMAN Eukaryotic translation initiation factor 4 gamma 2 |Homo sapiens	0.56194
>Q96AY3|FKB10_HUMAN Peptidyl-prolyl cis-trans isomerase FKBP10 |Homo sapiens	0.560696
>Q01082|SPTB2_HUMAN Spectrin beta chain, brain 1 |Homo sapiens;>Q9H254|SPTN4_HUMAN Spectrin beta chain, brain 3 |Homo sapiens;>O15020|SPTN2_HUMAN Spectrin beta chain, brain 2 |Homo sapiens	0.559112
>Q9H0A0|NAT10_HUMAN N-acetyltransferase 10 |Homo sapiens	0.559072
>Q9Y5K8|VATD_HUMAN V-type proton ATPase subunit D |Homo sapiens	0.558664
>O14579|COPE_HUMAN Coatomer subunit epsilon |Homo sapiens	0.556299
>P26640|SYVC_HUMAN Valine--tRNA ligase |Homo sapiens	0.556032
>Q05639|EF1A2_HUMAN Elongation factor 1-alpha 2 |Homo sapiens	0.555686
>P21333|FLNA_HUMAN Filamin-A |Homo sapiens;>O75369|FLNB_HUMAN Filamin-B |Homo sapiens	0.55442
>Q92797|SYMPK_HUMAN Symplekin |Homo sapiens	0.553939
>Q2M389|WASH7_HUMAN WASH complex subunit 7 |Homo sapiens	0.553796
>Q4VCS5|AMOT_HUMAN Angiomotin |Homo sapiens	0.553263
>P34932|HSP74_HUMAN Heat shock 70 kDa protein 4 |Homo sapiens	0.551013
>Q12768|STRUM_HUMAN WASH complex subunit strumpellin |Homo sapiens	0.549698
>O60287|NPA1P_HUMAN Nucleolar pre-ribosomal-associated protein 1 |Homo sapiens	0.548846
>P02533 SWISS-PROT:P02533 Tax_Id=9606 Gene_Symbol=KRT14 Keratin, type I cytoskeletal 14;>P02533|K1C14_HUMAN Keratin, type I cytoskeletal 14 |Homo sapiens	0.548177
>O60841|IF2P_HUMAN Eukaryotic translation initiation factor 5B |Homo sapiens	0.547367
>Q9UBQ7|GRHPR_HUMAN Glyoxylate reductase/hydroxypyruvate reductase |Homo sapiens	0.547314
>Q7Z4S6|KI21A_HUMAN Kinesin-like protein KIF21A |Homo sapiens;>O75037|KI21B_HUMAN Kinesin-like protein KIF21B |Homo sapiens	0.546248
>P51610|HCFC1_HUMAN Host cell factor 1 |Homo sapiens	0.546084
>P68104|EF1A1_HUMAN Elongation factor 1-alpha 1 |Homo sapiens;>Q5VTE0|EF1A3_HUMAN Putative elongation factor 1-alpha-like 3 |Homo sapiens;>Q05639|EF1A2_HUMAN Elongation factor 1-alpha 2 |Homo sapiens	0.545687
>P40123|CAP2_HUMAN Adenylyl cyclase-associated protein 2 |Homo sapiens	0.545551
>O43747|AP1G1_HUMAN AP-1 complex subunit gamma-1 |Homo sapiens	0.545213
>Q92900|RENT1_HUMAN Regulator of nonsense transcripts 1 |Homo sapiens	0.544462
>Q9Y490|TLN1_HUMAN Talin-1 |Homo sapiens	0.543723
>Q9UBW7|ZMYM2_HUMAN Zinc finger MYM-type protein 2 |Homo sapiens	0.542809
>Q14839|CHD4_HUMAN Chromodomain-helicase-DNA-binding protein 4 |Homo sapiens;>Q8TDI0|CHD5_HUMAN Chromodomain-helicase-DNA-binding protein 5 |Homo sapiens	0.542692
>O00469|PLOD2_HUMAN Procollagen-lysine,2-oxoglutarate 5-dioxygenase 2 |Homo sapiens	0.540397
>Q96Q15|SMG1_HUMAN Serine/threonine-protein kinase SMG1 |Homo sapiens	0.539627
>P60891|PRPS1_HUMAN Ribose-phosphate pyrophosphokinase 1 |Homo sapiens	0.536717
>P61201|CSN2_HUMAN COP9 signalosome complex subunit 2 |Homo sapiens	0.535501
>P49589|SYCC_HUMAN Cysteine--tRNA ligase, cytoplasmic |Homo sapiens	0.535196
>Q13868|EXOS2_HUMAN Exosome complex component RRP4 |Homo sapiens	0.532914
>P48444|COPD_HUMAN Coatomer subunit delta |Homo sapiens	0.53191
>Q16881|TRXR1_HUMAN Thioredoxin reductase 1, cytoplasmic |Homo sapiens;>Q9NNW7|TRXR2_HUMAN Thioredoxin reductase 2, mitochondrial |Homo sapiens	0.531165
>P13798|ACPH_HUMAN Acylamino-acid-releasing enzyme |Homo sapiens	0.528737
>Q9NQX3|GEPH_HUMAN Gephyrin |Homo sapiens	0.528736
>Q96T76|MMS19_HUMAN MMS19 nucleotide excision repair protein homolog |Homo sapiens	0.528202
>O00505|IMA3_HUMAN Importin subunit alpha-3 |Homo sapiens	0.527375
>Q96RU2|UBP28_HUMAN Ubiquitin carboxyl-terminal hydrolase 28 |Homo sapiens	0.527069
>P41091|IF2G_HUMAN Eukaryotic translation initiation factor 2 subunit 3 |Homo sapiens;>Q2VIR3|IF2GL_HUMAN Putative eukaryotic translation initiation factor 2 subunit 3-like protein |Homo sapiens	0.525719
>Q6P2E9|EDC4_HUMAN Enhancer of mRNA-decapping protein 4 |Homo sapiens	0.525687
>Q96CW1|AP2M1_HUMAN AP-2 complex subunit mu |Homo sapiens	0.524805
>Q13098|CSN1_HUMAN COP9 signalosome complex subunit 1 |Homo sapiens	0.52455
>Q8IXM2|BAP18_HUMAN Chromatin complexes subunit BAP18 |Homo sapiens	0.524231
>Q96B26|EXOS8_HUMAN Exosome complex component RRP43 |Homo sapiens	0.522986
>P08237|K6PF_HUMAN 6-phosphofructokinase, muscle type |Homo sapiens	0.522703
>O15020|SPTN2_HUMAN Spectrin beta chain, brain 2 |Homo sapiens	0.520611
>Q96QK1|VPS35_HUMAN Vacuolar protein sorting-associated protein 35 |Homo sapiens	0.519653
>O75131|CPNE3_HUMAN Copine-3 |Homo sapiens	0.518338
>O15144|ARPC2_HUMAN Actin-related protein 2/3 complex subunit 2 |Homo sapiens	0.515241
>Q96FJ2|DYL2_HUMAN Dynein light chain 2, cytoplasmic |Homo sapiens	0.515178
>Q641Q2|FA21A_HUMAN WASH complex subunit FAM21A |Homo sapiens;>Q5SNT6|FA21B_HUMAN WASH complex subunit FAM21B |Homo sapiens	0.514295
>P27695|APEX1_HUMAN DNA-(apurinic or apyrimidinic site) lyase |Homo sapiens	0.514078
>Q9BRS2|RIOK1_HUMAN Serine/threonine-protein kinase RIO1 |Homo sapiens	0.513019
>Q9H814|PHAX_HUMAN Phosphorylated adapter RNA export protein |Homo sapiens	0.512355
>Q8WUM0|NU133_HUMAN Nuclear pore complex protein Nup133 |Homo sapiens	0.511341
>Q9NR33|DPOE4_HUMAN DNA polymerase epsilon subunit 4 |Homo sapiens	0.511216
>Q08378|GOGA3_HUMAN Golgin subfamily A member 3 |Homo sapiens	0.510771
>Q96JK4|HIPL1_HUMAN HHIP-like protein 1 |Homo sapiens	0.510605
>Q7L576|CYFP1_HUMAN Cytoplasmic FMR1-interacting protein 1 |Homo sapiens;>Q96F07|CYFP2_HUMAN Cytoplasmic FMR1-interacting protein 2 |Homo sapiens	0.509972
>Q8N1F7|NUP93_HUMAN Nuclear pore complex protein Nup93 |Homo sapiens	0.509911
>Q9P253|VPS18_HUMAN Vacuolar protein sorting-associated protein 18 homolog |Homo sapiens	0.507882
>Q9UKN8|TF3C4_HUMAN General transcription factor 3C polypeptide 4 |Homo sapiens	0.507054
>P11586|C1TC_HUMAN C-1-tetrahydrofolate synthase, cytoplasmic |Homo sapiens;>Q6UB35|C1TM_HUMAN Monofunctional C1-tetrahydrofolate synthase, mitochondrial |Homo sapiens	0.506999
>Q96N67|DOCK7_HUMAN Dedicator of cytokinesis protein 7 |Homo sapiens	0.506926
>P49642|PRI1_HUMAN DNA primase small subunit |Homo sapiens	0.506834
>Q9Y5L4|TIM13_HUMAN Mitochondrial import inner membrane translocase subunit Tim13 |Homo sapiens	0.506099
>Q9BZK7|TBL1R_HUMAN F-box-like/WD repeat-containing protein TBL1XR1 |Homo sapiens;>O60907|TBL1X_HUMAN F-box-like/WD repeat-containing protein TBL1X |Homo sapiens;>Q9BQ87|TBL1Y_HUMAN F-box-like/WD repeat-containing protein TBL1Y |Homo sapiens	0.505929
>Q8IZP0|ABI1_HUMAN Abl interactor 1 |Homo sapiens;>Q9NYB9|ABI2_HUMAN Abl interactor 2 |Homo sapiens	0.505766
>Q92538|GBF1_HUMAN Golgi-specific brefeldin A-resistance guanine nucleotide exchange factor 1 |Homo sapiens	0.505258
>O43143|DHX15_HUMAN Putative pre-mRNA-splicing factor ATP-dependent RNA helicase DHX15 |Homo sapiens;>Q14562|DHX8_HUMAN ATP-dependent RNA helicase DHX8 |Homo sapiens;>O60231|DHX16_HUMAN Putative pre-mRNA-splicing factor ATP-dependent RNA helicase DHX16 |Ho	0.504607
>P30153|2AAA_HUMAN Serine/threonine-protein phosphatase 2A 65 kDa regulatory subunit A alpha isoform |Homo sapiens	0.503553
>Q8N1B4|VPS52_HUMAN Vacuolar protein sorting-associated protein 52 homolog |Homo sapiens	0.50342
>Q7Z4H3|HDDC2_HUMAN HD domain-containing protein 2 |Homo sapiens	0.502374
>P63010|AP2B1_HUMAN AP-2 complex subunit beta |Homo sapiens	0.501497
>P08107|HSP71_HUMAN Heat shock 70 kDa protein 1A/1B |Homo sapiens;>P17066|HSP76_HUMAN Heat shock 70 kDa protein 6 |Homo sapiens	0.500335
>Q9Y5S9|RBM8A_HUMAN RNA-binding protein 8A |Homo sapiens	0.500103
>Q8IWI9|MGAP_HUMAN MAX gene-associated protein |Homo sapiens	0.499023
>Q92973|TNPO1_HUMAN Transportin-1 |Homo sapiens	0.497713
>Q9Y2X3|NOP58_HUMAN Nucleolar protein 58 |Homo sapiens	0.497545
>P08134|RHOC_HUMAN Rho-related GTP-binding protein RhoC |Homo sapiens;>P61586|RHOA_HUMAN Transforming protein RhoA |Homo sapiens	0.496863
>Q8WV22|NSE1_HUMAN Non-structural maintenance of chromosomes element 1 homolog |Homo sapiens	0.496119
>Q92621|NU205_HUMAN Nuclear pore complex protein Nup205 |Homo sapiens	0.494708
>Q9NYU2|UGGG1_HUMAN UDP-glucose:glycoprotein glucosyltransferase 1 |Homo sapiens	0.493672
>Q9Y2T2|AP3M1_HUMAN AP-3 complex subunit mu-1 |Homo sapiens;>P53677|AP3M2_HUMAN AP-3 complex subunit mu-2 |Homo sapiens	0.492686
>Q9NP97|DLRB1_HUMAN Dynein light chain roadblock-type 1 |Homo sapiens;>Q8TF09|DLRB2_HUMAN Dynein light chain roadblock-type 2 |Homo sapiens	0.49268
>Q09161|NCBP1_HUMAN Nuclear cap-binding protein subunit 1 |Homo sapiens	0.49259
>Q9BW27|NUP85_HUMAN Nuclear pore complex protein Nup85 |Homo sapiens	0.492381
>Q96AY4|TTC28_HUMAN Tetratricopeptide repeat protein 28 |Homo sapiens	0.492359
>Q5VZL5|ZMYM4_HUMAN Zinc finger MYM-type protein 4 |Homo sapiens	0.49193
>Q01082|SPTB2_HUMAN Spectrin beta chain, brain 1 |Homo sapiens;>O15020|SPTN2_HUMAN Spectrin beta chain, brain 2 |Homo sapiens	0.491804
>O14929|HAT1_HUMAN Histone acetyltransferase type B catalytic subunit |Homo sapiens	0.491668
>P22392|NDKB_HUMAN Nucleoside diphosphate kinase B |Homo sapiens;>O60361|NDK8_HUMAN Putative nucleoside diphosphate kinase |Homo sapiens	0.491657
>Q5VYK3|ECM29_HUMAN Proteasome-associated protein ECM29 homolog |Homo sapiens	0.491624
>Q9BTE3|MCMBP_HUMAN Mini-chromosome maintenance complex-binding protein |Homo sapiens	0.491407
>Q9ULT8|HECD1_HUMAN E3 ubiquitin-protein ligase HECTD1 |Homo sapiens	0.491112
>P13639|EF2_HUMAN Elongation factor 2 |Homo sapiens	0.490201
>Q06203|PUR1_HUMAN Amidophosphoribosyltransferase |Homo sapiens	0.489267
>O95782|AP2A1_HUMAN AP-2 complex subunit alpha-1 |Homo sapiens;>O94973|AP2A2_HUMAN AP-2 complex subunit alpha-2 |Homo sapiens	0.489216
>Q8TDD1|DDX54_HUMAN ATP-dependent RNA helicase DDX54 |Homo sapiens	0.488989
>P61158|ARP3_HUMAN Actin-related protein 3 |Homo sapiens;>Q9P1U1|ARP3B_HUMAN Actin-related protein 3B |Homo sapiens	0.488768
>Q9UNS2|CSN3_HUMAN COP9 signalosome complex subunit 3 |Homo sapiens	0.48799
>Q96SB8|SMC6_HUMAN Structural maintenance of chromosomes protein 6 |Homo sapiens	0.487519
>P15586|GNS_HUMAN N-acetylglucosamine-6-sulfatase |Homo sapiens	0.482651
>Q9UBI1|COMD3_HUMAN COMM domain-containing protein 3 |Homo sapiens	0.482571
>P16930|FAAA_HUMAN Fumarylacetoacetase |Homo sapiens	0.482271
>Q92616|GCN1L_HUMAN Translational activator GCN1 |Homo sapiens	0.481906
>P10412|H14_HUMAN Histone H1.4 |Homo sapiens	0.481784
>Q1KMD3|HNRL2_HUMAN Heterogeneous nuclear ribonucleoprotein U-like protein 2 |Homo sapiens	0.481584
>Q9Y2A7|NCKP1_HUMAN Nck-associated protein 1 |Homo sapiens	0.481148
>Q6PD62|CTR9_HUMAN RNA polymerase-associated protein CTR9 homolog |Homo sapiens	0.481146
>Q4G0J3|LARP7_HUMAN La-related protein 7 |Homo sapiens	0.479446
>Q7Z4G1|COMD6_HUMAN COMM domain-containing protein 6 |Homo sapiens	0.478395
>O60343|TBCD4_HUMAN TBC1 domain family member 4 |Homo sapiens	0.478055
>Q9UJ83|HACL1_HUMAN 2-hydroxyacyl-CoA lyase 1 |Homo sapiens	0.477999
>P68104|EF1A1_HUMAN Elongation factor 1-alpha 1 |Homo sapiens;>Q5VTE0|EF1A3_HUMAN Putative elongation factor 1-alpha-like 3 |Homo sapiens	0.477402
>Q9NR30|DDX21_HUMAN Nucleolar RNA helicase 2 |Homo sapiens;>Q9BQ39|DDX50_HUMAN ATP-dependent RNA helicase DDX50 |Homo sapiens	0.476833
>Q9P0K7|RAI14_HUMAN Ankycorbin |Homo sapiens	0.476047
>Q32P28|P3H1_HUMAN Prolyl 3-hydroxylase 1 |Homo sapiens	0.47521
>O43684|BUB3_HUMAN Mitotic checkpoint protein BUB3 |Homo sapiens	0.473381
>P22392|NDKB_HUMAN Nucleoside diphosphate kinase B |Homo sapiens	0.472986
>Q9Y5Q8|TF3C5_HUMAN General transcription factor 3C polypeptide 5 |Homo sapiens	0.472905
>Streptavidin (S.avidinii)	0.472007
>O60293|ZC3H1_HUMAN Zinc finger C3H1 domain-containing protein |Homo sapiens	0.471024
>Q69YN4|VIR_HUMAN Protein virilizer homolog |Homo sapiens	0.469766
>Q14C86|GAPD1_HUMAN GTPase-activating protein and VPS9 domain-containing protein 1 |Homo sapiens	0.469133
>Q9Y3C0|CCD53_HUMAN WASH complex subunit CCDC53 |Homo sapiens	0.468193
>P09132|SRP19_HUMAN Signal recognition particle 19 kDa protein |Homo sapiens	0.467814
>P07195|LDHB_HUMAN L-lactate dehydrogenase B chain |Homo sapiens	0.467488
>P06753|TPM3_HUMAN Tropomyosin alpha-3 chain |Homo sapiens;>P67936|TPM4_HUMAN Tropomyosin alpha-4 chain |Homo sapiens	0.467175
>P56282|DPOE2_HUMAN DNA polymerase epsilon subunit 2 |Homo sapiens	0.46669
>P32322|P5CR1_HUMAN Pyrroline-5-carboxylate reductase 1, mitochondrial |Homo sapiens	0.466632
>Q6PGP7|TTC37_HUMAN Tetratricopeptide repeat protein 37 |Homo sapiens	0.465557
>P07195|LDHB_HUMAN L-lactate dehydrogenase B chain |Homo sapiens;>P00338|LDHA_HUMAN L-lactate dehydrogenase A chain |Homo sapiens;>Q6ZMR3|LDH6A_HUMAN L-lactate dehydrogenase A-like 6A |Homo sapiens	0.464725
>Q93009|UBP7_HUMAN Ubiquitin carboxyl-terminal hydrolase 7 |Homo sapiens	0.464649
>Q53H96|P5CR3_HUMAN Pyrroline-5-carboxylate reductase 3 |Homo sapiens	0.464607
>Q01518|CAP1_HUMAN Adenylyl cyclase-associated protein 1 |Homo sapiens	0.463993
>Q15042|RB3GP_HUMAN Rab3 GTPase-activating protein catalytic subunit |Homo sapiens	0.463431
>Q92558|WASF1_HUMAN Wiskott-Aldrich syndrome protein family member 1 |Homo sapiens	0.463229
>Q00610|CLH1_HUMAN Clathrin heavy chain 1 |Homo sapiens	0.462726
>P42704|LPPRC_HUMAN Leucine-rich PPR motif-containing protein, mitochondrial |Homo sapiens	0.462213
>Q3ZBD7 SWISS-PROT:Q3ZBD7 (Bos taurus) Glucose-6-phosphate isomerase	0.461539
>Q8WUW1|BRK1_HUMAN Protein BRICK1 |Homo sapiens	0.460985
>P62304|RUXE_HUMAN Small nuclear ribonucleoprotein E |Homo sapiens	0.459995
>P22392|NDKB_HUMAN Nucleoside diphosphate kinase B |Homo sapiens;>P15531|NDKA_HUMAN Nucleoside diphosphate kinase A |Homo sapiens	0.459528
>Q6UB35|C1TM_HUMAN Monofunctional C1-tetrahydrofolate synthase, mitochondrial |Homo sapiens	0.459493
>Q96N67|DOCK7_HUMAN Dedicator of cytokinesis protein 7 |Homo sapiens;>Q8NF50|DOCK8_HUMAN Dedicator of cytokinesis protein 8 |Homo sapiens	0.459489
>Q8IWX8|CHERP_HUMAN Calcium homeostasis endoplasmic reticulum protein |Homo sapiens	0.458308
>P21281|VATB2_HUMAN V-type proton ATPase subunit B, brain isoform |Homo sapiens;>P15313|VATB1_HUMAN V-type proton ATPase subunit B, kidney isoform |Homo sapiens	0.457186
>Q8NB37|PDDC1_HUMAN Parkinson disease 7 domain-containing protein 1 |Homo sapiens	0.457007
>P28838|AMPL_HUMAN Cytosol aminopeptidase |Homo sapiens	0.456387
>Q9NQA3|WASH6_HUMAN WAS protein family homolog 6 |Homo sapiens	0.455787
>Q75N03|HAKAI_HUMAN E3 ubiquitin-protein ligase Hakai |Homo sapiens	0.454911
>Q13435|SF3B2_HUMAN Splicing factor 3B subunit 2 |Homo sapiens	0.454762
>P24666|PPAC_HUMAN Low molecular weight phosphotyrosine protein phosphatase |Homo sapiens	0.454495
>Q12996|CSTF3_HUMAN Cleavage stimulation factor subunit 3 |Homo sapiens	0.454396
>P08238|HS90B_HUMAN Heat shock protein HSP 90-beta |Homo sapiens;>Q58FF8|H90B2_HUMAN Putative heat shock protein HSP 90-beta 2 |Homo sapiens	0.453919
>P37198|NUP62_HUMAN Nuclear pore glycoprotein p62 |Homo sapiens	0.453277
>Q9BR76|COR1B_HUMAN Coronin-1B |Homo sapiens	0.453207
>Q01518|CAP1_HUMAN Adenylyl cyclase-associated protein 1 |Homo sapiens;>P40123|CAP2_HUMAN Adenylyl cyclase-associated protein 2 |Homo sapiens	0.453111
>Q9NYB9|ABI2_HUMAN Abl interactor 2 |Homo sapiens	0.453095
>P78316|NOP14_HUMAN Nucleolar protein 14 |Homo sapiens	0.453071
>O95825|QORL1_HUMAN Quinone oxidoreductase-like protein 1 |Homo sapiens	0.452868
>P49321|NASP_HUMAN Nuclear autoantigenic sperm protein |Homo sapiens	0.45275
>Q9Y3R4|NEUR2_HUMAN Sialidase-2 |Homo sapiens	0.451839
>P68431|H31_HUMAN Histone H3.1 |Homo sapiens;>P84243|H33_HUMAN Histone H3.3 |Homo sapiens;>Q16695|H31T_HUMAN Histone H3.1t |Homo sapiens;>Q71DI3|H32_HUMAN Histone H3.2 |Homo sapiens;>Q6NXT2|H3C_HUMAN Histone H3.3C |Homo sapiens	0.451335
>P49792|RBP2_HUMAN E3 SUMO-protein ligase RanBP2 |Homo sapiens;>O14715|RGPD8_HUMAN RANBP2-like and GRIP domain-containing protein 8 |Homo sapiens;>Q99666|RGPD5_HUMAN RANBP2-like and GRIP domain-containing protein 5/6 |Homo sapiens	0.4512
>P04040|CATA_HUMAN Catalase |Homo sapiens	0.451178
>P21281|VATB2_HUMAN V-type proton ATPase subunit B, brain isoform |Homo sapiens	0.450675
>P42285|SK2L2_HUMAN Superkiller viralicidic activity 2-like 2 |Homo sapiens	0.449706
>O95373|IPO7_HUMAN Importin-7 |Homo sapiens	0.449338
>Q9NUG6|PDRG1_HUMAN p53 and DNA damage-regulated protein 1 |Homo sapiens	0.448815
>Q02252|MMSA_HUMAN Methylmalonate-semialdehyde dehydrogenase [acylating], mitochondrial |Homo sapiens	0.448308
>Q8N3U4|STAG2_HUMAN Cohesin subunit SA-2 |Homo sapiens	0.448162
>Q9BXB4|OSB11_HUMAN Oxysterol-binding protein-related protein 11 |Homo sapiens	0.447615
>P24941|CDK2_HUMAN Cyclin-dependent kinase 2 |Homo sapiens	0.447256
>Q14697|GANAB_HUMAN Neutral alpha-glucosidase AB |Homo sapiens	0.446964
>P07900|HS90A_HUMAN Heat shock protein HSP 90-alpha |Homo sapiens;>Q14568|HS902_HUMAN Putative heat shock protein HSP 90-alpha A2 |Homo sapiens;>Q58FG1|HS904_HUMAN Putative heat shock protein HSP 90-alpha A4 |Homo sapiens;>P08238|HS90B_HUMAN Heat shock pro	0.446878
>Q9Y6K9|NEMO_HUMAN NF-kappa-B essential modulator |Homo sapiens	0.446809
>P07900|HS90A_HUMAN Heat shock protein HSP 90-alpha |Homo sapiens;>P08238|HS90B_HUMAN Heat shock protein HSP 90-beta |Homo sapiens;>Q58FF7|H90B3_HUMAN Putative heat shock protein HSP 90-beta-3 |Homo sapiens;>Q58FF6|H90B4_HUMAN Putative heat shock protein H	0.445125
>Q9NPD3|EXOS4_HUMAN Exosome complex component RRP41 |Homo sapiens	0.444543
>P50570|DYN2_HUMAN Dynamin-2 |Homo sapiens	0.444441
>P40937|RFC5_HUMAN Replication factor C subunit 5 |Homo sapiens	0.441459
>P00367|DHE3_HUMAN Glutamate dehydrogenase 1, mitochondrial |Homo sapiens	0.441075
>Q9NRR5|UBQL4_HUMAN Ubiquilin-4 |Homo sapiens;>Q9UMX0|UBQL1_HUMAN Ubiquilin-1 |Homo sapiens	0.440638
>Q15437|SC23B_HUMAN Protein transport protein Sec23B |Homo sapiens;>Q15436|SC23A_HUMAN Protein transport protein Sec23A |Homo sapiens	0.440346
>Q12905|ILF2_HUMAN Interleukin enhancer-binding factor 2 |Homo sapiens	0.439819
>Q8TEX9|IPO4_HUMAN Importin-4 |Homo sapiens	0.43965
>Q9NRL3|STRN4_HUMAN Striatin-4 |Homo sapiens	0.439635
>Q9BV20|MTNA_HUMAN Methylthioribose-1-phosphate isomerase |Homo sapiens	0.438487
>O75369|FLNB_HUMAN Filamin-B |Homo sapiens	0.438412
>Q9UFC0|LRWD1_HUMAN Leucine-rich repeat and WD repeat-containing protein 1 |Homo sapiens	0.438043
>P52209|6PGD_HUMAN 6-phosphogluconate dehydrogenase, decarboxylating |Homo sapiens	0.437191
>Q9BVP2|GNL3_HUMAN Guanine nucleotide-binding protein-like 3 |Homo sapiens	0.437031
>Q9NRL3|STRN4_HUMAN Striatin-4 |Homo sapiens;>Q13033|STRN3_HUMAN Striatin-3 |Homo sapiens	0.437016
>Q96FV9|THOC1_HUMAN THO complex subunit 1 |Homo sapiens	0.436749
>Q5TAQ9|DCAF8_HUMAN DDB1- and CUL4-associated factor 8 |Homo sapiens	0.436437
>Q9BT78|CSN4_HUMAN COP9 signalosome complex subunit 4 |Homo sapiens	0.436362
>Q6UWZ7|F175A_HUMAN BRCA1-A complex subunit Abraxas |Homo sapiens	0.43612
>Q8NCA5|FA98A_HUMAN Protein FAM98A |Homo sapiens	0.435994
>P52701|MSH6_HUMAN DNA mismatch repair protein Msh6 |Homo sapiens	0.43491
>O95782|AP2A1_HUMAN AP-2 complex subunit alpha-1 |Homo sapiens	0.434162
>P29144|TPP2_HUMAN Tripeptidyl-peptidase 2 |Homo sapiens	0.433172
>Q06210|GFPT1_HUMAN Glucosamine--fructose-6-phosphate aminotransferase [isomerizing] 1 |Homo sapiens	0.433068
>Q08211|DHX9_HUMAN ATP-dependent RNA helicase A |Homo sapiens	0.432796
>Q10567|AP1B1_HUMAN AP-1 complex subunit beta-1 |Homo sapiens	0.432195
>Q9Y3B2|EXOS1_HUMAN Exosome complex component CSL4 |Homo sapiens	0.431298
>Q9Y490|TLN1_HUMAN Talin-1 |Homo sapiens;>Q9Y4G6|TLN2_HUMAN Talin-2 |Homo sapiens	0.430691
>Q9Y4E1|FA21C_HUMAN WASH complex subunit FAM21C |Homo sapiens;>Q641Q2|FA21A_HUMAN WASH complex subunit FAM21A |Homo sapiens;>Q5SNT6|FA21B_HUMAN WASH complex subunit FAM21B |Homo sapiens	0.43063
>P13639|EF2_HUMAN Elongation factor 2 |Homo sapiens;>Q15029|U5S1_HUMAN 116 kDa U5 small nuclear ribonucleoprotein component |Homo sapiens	0.430049
>P00338|LDHA_HUMAN L-lactate dehydrogenase A chain |Homo sapiens;>Q6ZMR3|LDH6A_HUMAN L-lactate dehydrogenase A-like 6A |Homo sapiens	0.428753
>Q92905|CSN5_HUMAN COP9 signalosome complex subunit 5 |Homo sapiens	0.42842
>P33176|KINH_HUMAN Kinesin-1 heavy chain |Homo sapiens;>Q12840|KIF5A_HUMAN Kinesin heavy chain isoform 5A |Homo sapiens;>O60282|KIF5C_HUMAN Kinesin heavy chain isoform 5C |Homo sapiens	0.428114
>Q8WVT3|TPC12_HUMAN Trafficking protein particle complex subunit 12 |Homo sapiens	0.427739
>Q5BKZ1|ZN326_HUMAN Zinc finger protein 326 |Homo sapiens	0.4273
>Q14683|SMC1A_HUMAN Structural maintenance of chromosomes protein 1A |Homo sapiens	0.426748
>Q9H0W8|SMG9_HUMAN Protein SMG9 |Homo sapiens	0.42663
>O14617|AP3D1_HUMAN AP-3 complex subunit delta-1 |Homo sapiens	0.425882
>P43243|MATR3_HUMAN Matrin-3 |Homo sapiens	0.425737
>Q9Y3Z3|SAMH1_HUMAN SAM domain and HD domain-containing protein 1 |Homo sapiens	0.424889
>Q9UIA9|XPO7_HUMAN Exportin-7 |Homo sapiens	0.424386
>Q00610|CLH1_HUMAN Clathrin heavy chain 1 |Homo sapiens;>P53675|CLH2_HUMAN Clathrin heavy chain 2 |Homo sapiens	0.423617
>Q86VP6|CAND1_HUMAN Cullin-associated NEDD8-dissociated protein 1 |Homo sapiens;>O75155|CAND2_HUMAN Cullin-associated NEDD8-dissociated protein 2 |Homo sapiens	0.423197
>Q9UMX0|UBQL1_HUMAN Ubiquilin-1 |Homo sapiens	0.422555
>Q9GZS3|WDR61_HUMAN WD repeat-containing protein 61 |Homo sapiens	0.422168
>P60510|PP4C_HUMAN Serine/threonine-protein phosphatase 4 catalytic subunit |Homo sapiens	0.421647
>P42566|EPS15_HUMAN Epidermal growth factor receptor substrate 15 |Homo sapiens	0.421507
>Q5VUJ6|LRCH2_HUMAN Leucine-rich repeat and calponin homology domain-containing protein 2 |Homo sapiens	0.421339
>Q06323|PSME1_HUMAN Proteasome activator complex subunit 1 |Homo sapiens	0.420259
>O75717|WDHD1_HUMAN WD repeat and HMG-box DNA-binding protein 1 |Homo sapiens	0.419029
>P60842|IF4A1_HUMAN Eukaryotic initiation factor 4A-I |Homo sapiens;>Q14240|IF4A2_HUMAN Eukaryotic initiation factor 4A-II |Homo sapiens;>P38919|IF4A3_HUMAN Eukaryotic initiation factor 4A-III |Homo sapiens	0.418887
>P06737|PYGL_HUMAN Glycogen phosphorylase, liver form |Homo sapiens	0.418408
>Q13011|ECH1_HUMAN Delta(3,5)-Delta(2,4)-dienoyl-CoA isomerase, mitochondrial |Homo sapiens	0.418168
>Q13769|THOC5_HUMAN THO complex subunit 5 homolog |Homo sapiens	0.41576
>Q14008|CKAP5_HUMAN Cytoskeleton-associated protein 5 |Homo sapiens	0.415577
>Q92598|HS105_HUMAN Heat shock protein 105 kDa |Homo sapiens;>O95757|HS74L_HUMAN Heat shock 70 kDa protein 4L |Homo sapiens	0.415381
>O43143|DHX15_HUMAN Putative pre-mRNA-splicing factor ATP-dependent RNA helicase DHX15 |Homo sapiens	0.415379
>O94776|MTA2_HUMAN Metastasis-associated protein MTA2 |Homo sapiens	0.414931
>Q9UQE7|SMC3_HUMAN Structural maintenance of chromosomes protein 3 |Homo sapiens	0.413572
>Q9NPH2|INO1_HUMAN Inositol-3-phosphate synthase 1 |Homo sapiens	0.412135
>O60610|DIAP1_HUMAN Protein diaphanous homolog 1 |Homo sapiens	0.411911
>Q70CQ2|UBP34_HUMAN Ubiquitin carboxyl-terminal hydrolase 34 |Homo sapiens	0.411231
>P26196|DDX6_HUMAN Probable ATP-dependent RNA helicase DDX6 |Homo sapiens	0.410556
>P61923|COPZ1_HUMAN Coatomer subunit zeta-1 |Homo sapiens	0.410111
>P41091|IF2G_HUMAN Eukaryotic translation initiation factor 2 subunit 3 |Homo sapiens	0.409599
>P04075|ALDOA_HUMAN Fructose-bisphosphate aldolase A |Homo sapiens;>P05062|ALDOB_HUMAN Fructose-bisphosphate aldolase B |Homo sapiens;>P09972|ALDOC_HUMAN Fructose-bisphosphate aldolase C |Homo sapiens	0.408616
>Q15007|FL2D_HUMAN Pre-mRNA-splicing regulator WTAP |Homo sapiens	0.40831
>Q96F86|EDC3_HUMAN Enhancer of mRNA-decapping protein 3 |Homo sapiens	0.4082
>Q92598|HS105_HUMAN Heat shock protein 105 kDa |Homo sapiens	0.408085
>Q9BWJ5|SF3B5_HUMAN Splicing factor 3B subunit 5 |Homo sapiens	0.407724
>P54577|SYYC_HUMAN Tyrosine--tRNA ligase, cytoplasmic |Homo sapiens	0.407175
>P49591|SYSC_HUMAN Serine--tRNA ligase, cytoplasmic |Homo sapiens	0.405828
>P09884|DPOLA_HUMAN DNA polymerase alpha catalytic subunit |Homo sapiens	0.405397
>P50851|LRBA_HUMAN Lipopolysaccharide-responsive and beige-like anchor protein |Homo sapiens	0.405131
>P36543|VATE1_HUMAN V-type proton ATPase subunit E 1 |Homo sapiens	0.404721
>Q9UHV9|PFD2_HUMAN Prefoldin subunit 2 |Homo sapiens	0.404588
>Q16543|CDC37_HUMAN Hsp90 co-chaperone Cdc37 |Homo sapiens	0.403375
>P23528|COF1_HUMAN Cofilin-1 |Homo sapiens;>Q9Y281|COF2_HUMAN Cofilin-2 |Homo sapiens	0.403236
>Q14839|CHD4_HUMAN Chromodomain-helicase-DNA-binding protein 4 |Homo sapiens	0.402288
>Q9UK76|HN1_HUMAN Hematological and neurological expressed 1 protein |Homo sapiens	0.402062
>P30566|PUR8_HUMAN Adenylosuccinate lyase |Homo sapiens	0.400921
>Q12830|BPTF_HUMAN Nucleosome-remodeling factor subunit BPTF |Homo sapiens	0.400539
>P14735|IDE_HUMAN Insulin-degrading enzyme |Homo sapiens	0.400471
>Q9Y6D6|BIG1_HUMAN Brefeldin A-inhibited guanine nucleotide-exchange protein 1 |Homo sapiens	0.400332
>Q99627|CSN8_HUMAN COP9 signalosome complex subunit 8 |Homo sapiens	0.400265
>Q9BTT0|AN32E_HUMAN Acidic leucine-rich nuclear phosphoprotein 32 family member E |Homo sapiens	0.399979
>P08238|HS90B_HUMAN Heat shock protein HSP 90-beta |Homo sapiens	0.398031
>Q9UBW8|CSN7A_HUMAN COP9 signalosome complex subunit 7a |Homo sapiens	0.397867
>P62495|ERF1_HUMAN Eukaryotic peptide chain release factor subunit 1 |Homo sapiens	0.397504
>Q00839|HNRPU_HUMAN Heterogeneous nuclear ribonucleoprotein U |Homo sapiens	0.397453
>Q6NZY4|ZCHC8_HUMAN Zinc finger CCHC domain-containing protein 8 |Homo sapiens	0.396517
>P11413|G6PD_HUMAN Glucose-6-phosphate 1-dehydrogenase |Homo sapiens	0.396319
>P62877|RBX1_HUMAN E3 ubiquitin-protein ligase RBX1 |Homo sapiens	0.396084
>P24534|EF1B_HUMAN Elongation factor 1-beta |Homo sapiens	0.396043
>Q9Y4Y9|LSM5_HUMAN U6 snRNA-associated Sm-like protein LSm5 |Homo sapiens	0.395853
>Q13616|CUL1_HUMAN Cullin-1 |Homo sapiens	0.395694
>P52948|NUP98_HUMAN Nuclear pore complex protein Nup98-Nup96 |Homo sapiens	0.394754
>P22102|PUR2_HUMAN Trifunctional purine biosynthetic protein adenosine-3 |Homo sapiens	0.394724
>P38606|VATA_HUMAN V-type proton ATPase catalytic subunit A |Homo sapiens	0.39333
>Q15631|TSN_HUMAN Translin |Homo sapiens	0.39293
>Q9NSD9|SYFB_HUMAN Phenylalanine--tRNA ligase beta subunit |Homo sapiens	0.390502
>O15460|P4HA2_HUMAN Prolyl 4-hydroxylase subunit alpha-2 |Homo sapiens	0.389621
>Q9UQ80|PA2G4_HUMAN Proliferation-associated protein 2G4 |Homo sapiens	0.389454
>P40938|RFC3_HUMAN Replication factor C subunit 3 |Homo sapiens	0.388954
>P12004|PCNA_HUMAN Proliferating cell nuclear antigen |Homo sapiens	0.388522
>Q9Y6Y8|S23IP_HUMAN SEC23-interacting protein |Homo sapiens	0.388414
>P17812|PYRG1_HUMAN CTP synthase 1 |Homo sapiens	0.3874
>P07910|HNRPC_HUMAN Heterogeneous nuclear ribonucleoproteins C1/C2 |Homo sapiens	0.386567
>P60842|IF4A1_HUMAN Eukaryotic initiation factor 4A-I |Homo sapiens;>Q14240|IF4A2_HUMAN Eukaryotic initiation factor 4A-II |Homo sapiens	0.386301
>Q9H9Q2|CSN7B_HUMAN COP9 signalosome complex subunit 7b |Homo sapiens	0.385285
>Q8TCS8|PNPT1_HUMAN Polyribonucleotide nucleotidyltransferase 1, mitochondrial |Homo sapiens	0.384465
>P62826|RAN_HUMAN GTP-binding nuclear protein Ran |Homo sapiens	0.384145
>P21333|FLNA_HUMAN Filamin-A |Homo sapiens;>Q14315|FLNC_HUMAN Filamin-C |Homo sapiens;>O75369|FLNB_HUMAN Filamin-B |Homo sapiens	0.383669
>O15145|ARPC3_HUMAN Actin-related protein 2/3 complex subunit 3 |Homo sapiens	0.382401
>P55060|XPO2_HUMAN Exportin-2 |Homo sapiens	0.381719
>P07900|HS90A_HUMAN Heat shock protein HSP 90-alpha |Homo sapiens	0.381468
>Q15436|SC23A_HUMAN Protein transport protein Sec23A |Homo sapiens	0.381435
>P35520|CBS_HUMAN Cystathionine beta-synthase |Homo sapiens	0.381386
>O75150|BRE1B_HUMAN E3 ubiquitin-protein ligase BRE1B |Homo sapiens	0.381263
>Q15233|NONO_HUMAN Non-POU domain-containing octamer-binding protein |Homo sapiens;>P23246|SFPQ_HUMAN Splicing factor, proline- and glutamine-rich |Homo sapiens	0.380465
>Q13085|ACACA_HUMAN Acetyl-CoA carboxylase 1 |Homo sapiens;>O00763|ACACB_HUMAN Acetyl-CoA carboxylase 2 |Homo sapiens	0.379609
>O00410|IPO5_HUMAN Importin-5 |Homo sapiens	0.379577
>P46736|BRCC3_HUMAN Lys-63-specific deubiquitinase BRCC36 |Homo sapiens	0.379359
>Q13620|CUL4B_HUMAN Cullin-4B |Homo sapiens	0.379179
>P55010|IF5_HUMAN Eukaryotic translation initiation factor 5 |Homo sapiens	0.378981
>O95749|GGPPS_HUMAN Geranylgeranyl pyrophosphate synthase |Homo sapiens	0.377384
>P43246|MSH2_HUMAN DNA mismatch repair protein Msh2 |Homo sapiens	0.377285
>Q15907|RB11B_HUMAN Ras-related protein Rab-11B |Homo sapiens;>P62491|RB11A_HUMAN Ras-related protein Rab-11A |Homo sapiens	0.377218
>O15027|SC16A_HUMAN Protein transport protein Sec16A |Homo sapiens	0.376472
>Q8IX12|CCAR1_HUMAN Cell division cycle and apoptosis regulator protein 1 |Homo sapiens	0.375492
>P59998|ARPC4_HUMAN Actin-related protein 2/3 complex subunit 4 |Homo sapiens	0.375188
>P49189|AL9A1_HUMAN 4-trimethylaminobutyraldehyde dehydrogenase |Homo sapiens	0.374576
>Q99567|NUP88_HUMAN Nuclear pore complex protein Nup88 |Homo sapiens	0.374126
>Q14686|NCOA6_HUMAN Nuclear receptor coactivator 6 |Homo sapiens	0.37339
>P07737|PROF1_HUMAN Profilin-1 |Homo sapiens;>P02584 SWISS-PROT:P02584 (Bos taurus) Profilin-1	0.372585
>P61289|PSME3_HUMAN Proteasome activator complex subunit 3 |Homo sapiens	0.371673
>Q7KZF4|SND1_HUMAN Staphylococcal nuclease domain-containing protein 1 |Homo sapiens	0.371523
>P04818|TYSY_HUMAN Thymidylate synthase |Homo sapiens	0.371377
>P35658|NU214_HUMAN Nuclear pore complex protein Nup214 |Homo sapiens	0.371311
>Q9Y4L1|HYOU1_HUMAN Hypoxia up-regulated protein 1 |Homo sapiens	0.371258
>Q9H6D7|HAUS4_HUMAN HAUS augmin-like complex subunit 4 |Homo sapiens	0.370638
>Q99873|ANM1_HUMAN Protein arginine N-methyltransferase 1 |Homo sapiens	0.370599
>Q13813|SPTA2_HUMAN Spectrin alpha chain, brain |Homo sapiens	0.370358
>Q16181|SEPT7_HUMAN Septin-7 |Homo sapiens;>Q6ZU15|SEP14_HUMAN Septin-14 |Homo sapiens	0.370297
>P63151|2ABA_HUMAN Serine/threonine-protein phosphatase 2A 55 kDa regulatory subunit B alpha isoform |Homo sapiens	0.36932
>Q12906|ILF3_HUMAN Interleukin enhancer-binding factor 3 |Homo sapiens	0.369095
>Q16204|CCDC6_HUMAN Coiled-coil domain-containing protein 6 |Homo sapiens	0.368903
>Q9BT73|PSMG3_HUMAN Proteasome assembly chaperone 3 |Homo sapiens	0.368844
>Q06210|GFPT1_HUMAN Glucosamine--fructose-6-phosphate aminotransferase [isomerizing] 1 |Homo sapiens;>O94808|GFPT2_HUMAN Glucosamine--fructose-6-phosphate aminotransferase [isomerizing] 2 |Homo sapiens	0.368403
>Q13416|ORC2_HUMAN Origin recognition complex subunit 2 |Homo sapiens	0.368242
>Q96F63|CCD97_HUMAN Coiled-coil domain-containing protein 97 |Homo sapiens	0.367826
>O15212|PFD6_HUMAN Prefoldin subunit 6 |Homo sapiens	0.367658
>O94973|AP2A2_HUMAN AP-2 complex subunit alpha-2 |Homo sapiens	0.367513
>Q99733|NP1L4_HUMAN Nucleosome assembly protein 1-like 4 |Homo sapiens;>P55209|NP1L1_HUMAN Nucleosome assembly protein 1-like 1 |Homo sapiens	0.366799
>Q5SW79|CE170_HUMAN Centrosomal protein of 170 kDa |Homo sapiens	0.366572
>P23526|SAHH_HUMAN Adenosylhomocysteinase |Homo sapiens	0.365963
>P46940|IQGA1_HUMAN Ras GTPase-activating-like protein IQGAP1 |Homo sapiens	0.365811
>Q9GZT8|NIF3L_HUMAN NIF3-like protein 1 |Homo sapiens	0.364913
>Q10567|AP1B1_HUMAN AP-1 complex subunit beta-1 |Homo sapiens;>P63010|AP2B1_HUMAN AP-2 complex subunit beta |Homo sapiens	0.364705
>P33992|MCM5_HUMAN DNA replication licensing factor MCM5 |Homo sapiens	0.364545
>P14618|KPYM_HUMAN Pyruvate kinase isozymes M1/M2 |Homo sapiens;>P30613|KPYR_HUMAN Pyruvate kinase isozymes R/L |Homo sapiens	0.364029
>Q13162|PRDX4_HUMAN Peroxiredoxin-4 |Homo sapiens	0.363965
>Q92878|RAD50_HUMAN DNA repair protein RAD50 |Homo sapiens	0.363949
>P53041|PPP5_HUMAN Serine/threonine-protein phosphatase 5 |Homo sapiens	0.363574
>P00367|DHE3_HUMAN Glutamate dehydrogenase 1, mitochondrial |Homo sapiens;>P49448|DHE4_HUMAN Glutamate dehydrogenase 2, mitochondrial |Homo sapiens	0.363132
>P57740|NU107_HUMAN Nuclear pore complex protein Nup107 |Homo sapiens	0.361715
>Q86TI2|DPP9_HUMAN Dipeptidyl peptidase 9 |Homo sapiens	0.361519
>Q9H2M9|RBGPR_HUMAN Rab3 GTPase-activating protein non-catalytic subunit |Homo sapiens	0.361453
>P21333|FLNA_HUMAN Filamin-A |Homo sapiens	0.361005
>P49792|RBP2_HUMAN E3 SUMO-protein ligase RanBP2 |Homo sapiens	0.360867
>Q96CS2|HAUS1_HUMAN HAUS augmin-like complex subunit 1 |Homo sapiens	0.359533
>Q15637|SF01_HUMAN Splicing factor 1 |Homo sapiens	0.358935
>Q9H0L4|CSTFT_HUMAN Cleavage stimulation factor subunit 2 tau variant |Homo sapiens	0.358418
>Q9UPU5|UBP24_HUMAN Ubiquitin carboxyl-terminal hydrolase 24 |Homo sapiens	0.358057
>Q99570|PI3R4_HUMAN Phosphoinositide 3-kinase regulatory subunit 4 |Homo sapiens	0.357726
>Q8IZP0|ABI1_HUMAN Abl interactor 1 |Homo sapiens	0.357513
>O14686|MLL2_HUMAN Histone-lysine N-methyltransferase MLL2 |Homo sapiens	0.356556
>Q6PID6|TTC33_HUMAN Tetratricopeptide repeat protein 33 |Homo sapiens	0.356047
>P61160|ARP2_HUMAN Actin-related protein 2 |Homo sapiens	0.356018
>Q9Y224|CN166_HUMAN UPF0568 protein C14orf166 |Homo sapiens	0.354438
>Q9H2P0|ADNP_HUMAN Activity-dependent neuroprotector homeobox protein |Homo sapiens	0.353894
>Q7Z4S6|KI21A_HUMAN Kinesin-like protein KIF21A |Homo sapiens	0.351887
>P34932|HSP74_HUMAN Heat shock 70 kDa protein 4 |Homo sapiens;>Q92598|HS105_HUMAN Heat shock protein 105 kDa |Homo sapiens;>O95757|HS74L_HUMAN Heat shock 70 kDa protein 4L |Homo sapiens	0.35129
>Q96CX2|KCD12_HUMAN BTB/POZ domain-containing protein KCTD12 |Homo sapiens	0.350139
>Q15437|SC23B_HUMAN Protein transport protein Sec23B |Homo sapiens	0.34909
>Q86X55|CARM1_HUMAN Histone-arginine methyltransferase CARM1 |Homo sapiens	0.345575
>Q07864|DPOE1_HUMAN DNA polymerase epsilon catalytic subunit A |Homo sapiens	0.345251
>P23378|GCSP_HUMAN Glycine dehydrogenase [decarboxylating], mitochondrial |Homo sapiens	0.344667
>P53396|ACLY_HUMAN ATP-citrate synthase |Homo sapiens	0.344484
>Q14181|DPOA2_HUMAN DNA polymerase alpha subunit B |Homo sapiens	0.344383
>Q5SRE5|NU188_HUMAN Nucleoporin NUP188 homolog |Homo sapiens	0.344116
>P51649|SSDH_HUMAN Succinate-semialdehyde dehydrogenase, mitochondrial |Homo sapiens	0.343919
>O60506|HNRPQ_HUMAN Heterogeneous nuclear ribonucleoprotein Q |Homo sapiens	0.343127
>Q99459|CDC5L_HUMAN Cell division cycle 5-like protein |Homo sapiens	0.341926
>Q9Y2L1|RRP44_HUMAN Exosome complex exonuclease RRP44 |Homo sapiens	0.341881
>P30101|PDIA3_HUMAN Protein disulfide-isomerase A3 |Homo sapiens	0.341619
>P09497|CLCB_HUMAN Clathrin light chain B |Homo sapiens	0.341509
>P49959|MRE11_HUMAN Double-strand break repair protein MRE11A |Homo sapiens	0.341292
>Q9BXR0|TGT_HUMAN Queuine tRNA-ribosyltransferase |Homo sapiens	0.339637
>P49902|5NTC_HUMAN Cytosolic purine 5-nucleotidase |Homo sapiens	0.339619
>O60832|DKC1_HUMAN H/ACA ribonucleoprotein complex subunit 4 |Homo sapiens	0.339118
>P05198|IF2A_HUMAN Eukaryotic translation initiation factor 2 subunit 1 |Homo sapiens	0.339073
>Q14103|HNRPD_HUMAN Heterogeneous nuclear ribonucleoprotein D0 |Homo sapiens	0.339057
>P06737|PYGL_HUMAN Glycogen phosphorylase, liver form |Homo sapiens;>P11217|PYGM_HUMAN Glycogen phosphorylase, muscle form |Homo sapiens	0.33859
>P33176|KINH_HUMAN Kinesin-1 heavy chain |Homo sapiens	0.338219
>Q9UL46|PSME2_HUMAN Proteasome activator complex subunit 2 |Homo sapiens	0.337883
>Q4LE39|ARI4B_HUMAN AT-rich interactive domain-containing protein 4B |Homo sapiens;>P29374|ARI4A_HUMAN AT-rich interactive domain-containing protein 4A |Homo sapiens	0.337464
>Q8WUA4|TF3C2_HUMAN General transcription factor 3C polypeptide 2 |Homo sapiens	0.336774
>O60934|NBN_HUMAN Nibrin |Homo sapiens	0.336498
>O43707|ACTN4_HUMAN Alpha-actinin-4 |Homo sapiens;>Q08043|ACTN3_HUMAN Alpha-actinin-3 |Homo sapiens;>P35609|ACTN2_HUMAN Alpha-actinin-2 |Homo sapiens	0.33637
>P32929|CGL_HUMAN Cystathionine gamma-lyase |Homo sapiens	0.3361
>Q15369|ELOC_HUMAN Transcription elongation factor B polypeptide 1 |Homo sapiens	0.335194
>Q05048|CSTF1_HUMAN Cleavage stimulation factor subunit 1 |Homo sapiens	0.335166
>O14576|DC1I1_HUMAN Cytoplasmic dynein 1 intermediate chain 1 |Homo sapiens	0.335044
>Q9NXF7|DCA16_HUMAN DDB1- and CUL4-associated factor 16 |Homo sapiens	0.33502
>Q8WXF1|PSPC1_HUMAN Paraspeckle component 1 |Homo sapiens	0.334457
>P49247|RPIA_HUMAN Ribose-5-phosphate isomerase |Homo sapiens	0.332841
>P58876|H2B1D_HUMAN Histone H2B type 1-D |Homo sapiens;>P62807|H2B1C_HUMAN Histone H2B type 1-C/E/F/G/I |Homo sapiens;>Q5QNW6|H2B2F_HUMAN Histone H2B type 2-F |Homo sapiens;>Q93079|H2B1H_HUMAN Histone H2B type 1-H |Homo sapiens;>Q99877|H2B1N_HUMAN Histone	0.33258
>P67775|PP2AA_HUMAN Serine/threonine-protein phosphatase 2A catalytic subunit alpha isoform |Homo sapiens;>P62714|PP2AB_HUMAN Serine/threonine-protein phosphatase 2A catalytic subunit beta isoform |Homo sapiens;>P60510|PP4C_HUMAN Serine/threonine-protein p	0.332509
>P33240|CSTF2_HUMAN Cleavage stimulation factor subunit 2 |Homo sapiens	0.331302
>Q9Y2X7|GIT1_HUMAN ARF GTPase-activating protein GIT1 |Homo sapiens;>Q14161|GIT2_HUMAN ARF GTPase-activating protein GIT2 |Homo sapiens	0.330877
>P34897|GLYM_HUMAN Serine hydroxymethyltransferase, mitochondrial |Homo sapiens	0.330631
>P12955|PEPD_HUMAN Xaa-Pro dipeptidase |Homo sapiens	0.330208
>P49792|RBP2_HUMAN E3 SUMO-protein ligase RanBP2 |Homo sapiens;>A6NKT7|RGPD3_HUMAN RanBP2-like and GRIP domain-containing protein 3 |Homo sapiens	0.329694
>P08133|ANXA6_HUMAN Annexin A6 |Homo sapiens	0.328881
>O15511|ARPC5_HUMAN Actin-related protein 2/3 complex subunit 5 |Homo sapiens	0.328282
>P07954|FUMH_HUMAN Fumarate hydratase, mitochondrial |Homo sapiens	0.327871
>P51553|IDH3G_HUMAN Isocitrate dehydrogenase [NAD] subunit gamma, mitochondrial |Homo sapiens	0.327596
>O94776|MTA2_HUMAN Metastasis-associated protein MTA2 |Homo sapiens;>Q9BTC8|MTA3_HUMAN Metastasis-associated protein MTA3 |Homo sapiens;>Q13330|MTA1_HUMAN Metastasis-associated protein MTA1 |Homo sapiens	0.32662
>Q96KP1|EXOC2_HUMAN Exocyst complex component 2 |Homo sapiens	0.325962
>Q16555|DPYL2_HUMAN Dihydropyrimidinase-related protein 2 |Homo sapiens;>Q14194|DPYL1_HUMAN Dihydropyrimidinase-related protein 1 |Homo sapiens;>Q14195|DPYL3_HUMAN Dihydropyrimidinase-related protein 3 |Homo sapiens	0.325817
>O00233|PSMD9_HUMAN 26S proteasome non-ATPase regulatory subunit 9 |Homo sapiens	0.325379
>Q9Y4Z0|LSM4_HUMAN U6 snRNA-associated Sm-like protein LSm4 |Homo sapiens	0.324982
>O60547|GMDS_HUMAN GDP-mannose 4,6 dehydratase |Homo sapiens	0.324932
>P22392|NDKB_HUMAN Nucleoside diphosphate kinase B |Homo sapiens;>O60361|NDK8_HUMAN Putative nucleoside diphosphate kinase |Homo sapiens;>P15531|NDKA_HUMAN Nucleoside diphosphate kinase A |Homo sapiens	0.324336
>Q16740|CLPP_HUMAN Putative ATP-dependent Clp protease proteolytic subunit, mitochondrial |Homo sapiens	0.323998
>Q9NY12|GAR1_HUMAN H/ACA ribonucleoprotein complex subunit 1 |Homo sapiens	0.32377
>P50395|GDIB_HUMAN Rab GDP dissociation inhibitor beta |Homo sapiens	0.323197
>O60264|SMCA5_HUMAN SWI/SNF-related matrix-associated actin-dependent regulator of chromatin subfamily A member 5 |Homo sapiens;>P28370|SMCA1_HUMAN Probable global transcription activator SNF2L1 |Homo sapiens	0.323141
>Q8IYS1|P20D2_HUMAN Peptidase M20 domain-containing protein 2 |Homo sapiens	0.322789
>O00567|NOP56_HUMAN Nucleolar protein 56 |Homo sapiens	0.322295
>P05091|ALDH2_HUMAN Aldehyde dehydrogenase, mitochondrial |Homo sapiens	0.321903
>Q9UMS4|PRP19_HUMAN Pre-mRNA-processing factor 19 |Homo sapiens	0.321705
>Q9NPI6|DCP1A_HUMAN mRNA-decapping enzyme 1A |Homo sapiens	0.321097
>P60891|PRPS1_HUMAN Ribose-phosphate pyrophosphokinase 1 |Homo sapiens;>P21108|PRPS3_HUMAN Ribose-phosphate pyrophosphokinase 3 |Homo sapiens	0.320913
>P17844|DDX5_HUMAN Probable ATP-dependent RNA helicase DDX5 |Homo sapiens	0.319839
>P11586|C1TC_HUMAN C-1-tetrahydrofolate synthase, cytoplasmic |Homo sapiens	0.319189
>O94788|AL1A2_HUMAN Retinal dehydrogenase 2 |Homo sapiens	0.319005
>O94979|SC31A_HUMAN Protein transport protein Sec31A |Homo sapiens	0.318796
>Q58WW2|DCAF6_HUMAN DDB1- and CUL4-associated factor 6 |Homo sapiens	0.318647
>Q8TAG9|EXOC6_HUMAN Exocyst complex component 6 |Homo sapiens	0.318557
>P16152|CBR1_HUMAN Carbonyl reductase [NADPH] 1 |Homo sapiens;>O75828|CBR3_HUMAN Carbonyl reductase [NADPH] 3 |Homo sapiens	0.318463
>Q7RTV0|PHF5A_HUMAN PHD finger-like domain-containing protein 5A |Homo sapiens	0.31764
>Q9Y4E1|FA21C_HUMAN WASH complex subunit FAM21C |Homo sapiens;>Q641Q2|FA21A_HUMAN WASH complex subunit FAM21A |Homo sapiens	0.317493
>Q15691|MARE1_HUMAN Microtubule-associated protein RP/EB family member 1 |Homo sapiens	0.317085
>P62805|H4_HUMAN Histone H4 |Homo sapiens	0.31695
>Q9BPU6|DPYL5_HUMAN Dihydropyrimidinase-related protein 5 |Homo sapiens	0.316488
>Q9Y617|SERC_HUMAN Phosphoserine aminotransferase |Homo sapiens	0.3154
>Q9BV19|CA050_HUMAN Uncharacterized protein C1orf50 |Homo sapiens	0.314371
>P04075|ALDOA_HUMAN Fructose-bisphosphate aldolase A |Homo sapiens;>P09972|ALDOC_HUMAN Fructose-bisphosphate aldolase C |Homo sapiens	0.313892
>Q99471|PFD5_HUMAN Prefoldin subunit 5 |Homo sapiens	0.31368
>Q01081|U2AF1_HUMAN Splicing factor U2AF 35 kDa subunit |Homo sapiens;>Q8WU68|U2AF4_HUMAN Splicing factor U2AF 26 kDa subunit |Homo sapiens	0.313494
>P49588|SYAC_HUMAN Alanine--tRNA ligase, cytoplasmic |Homo sapiens	0.313347
>P12268|IMDH2_HUMAN Inosine-5-monophosphate dehydrogenase 2 |Homo sapiens	0.312699
>Q92499|DDX1_HUMAN ATP-dependent RNA helicase DDX1 |Homo sapiens	0.31192
>Q99707|METH_HUMAN Methionine synthase |Homo sapiens	0.311796
>Q9C0C9|UBE2O_HUMAN Ubiquitin-conjugating enzyme E2 O |Homo sapiens	0.311772
>P22314|UBA1_HUMAN Ubiquitin-like modifier-activating enzyme 1 |Homo sapiens	0.310808
>Q8WVC0|LEO1_HUMAN RNA polymerase-associated protein LEO1 |Homo sapiens	0.310795
>P48163|MAOX_HUMAN NADP-dependent malic enzyme |Homo sapiens	0.310554
>Q5T1J5|CHCH9_HUMAN Putative coiled-coil-helix-coiled-coil-helix domain-containing protein CHCHD2P9, mitochondrial |Homo sapiens;>Q9Y6H1|CHCH2_HUMAN Coiled-coil-helix-coiled-coil-helix domain-containing protein 2, mitochondrial |Homo sapiens	0.309813
>P18754|RCC1_HUMAN Regulator of chromosome condensation |Homo sapiens	0.309565
>P13010|XRCC5_HUMAN X-ray repair cross-complementing protein 5 |Homo sapiens	0.308695
>P08559|ODPA_HUMAN Pyruvate dehydrogenase E1 component subunit alpha, somatic form, mitochondrial |Homo sapiens	0.308379
>P34896|GLYC_HUMAN Serine hydroxymethyltransferase, cytosolic |Homo sapiens	0.308005
>Q9Y294|ASF1A_HUMAN Histone chaperone ASF1A |Homo sapiens	0.307558
>P14866|HNRPL_HUMAN Heterogeneous nuclear ribonucleoprotein L |Homo sapiens	0.30727
>P60953|CDC42_HUMAN Cell division control protein 42 homolog |Homo sapiens	0.306825
>Q96BD5|PF21A_HUMAN PHD finger protein 21A |Homo sapiens	0.306023
>P09496|CLCA_HUMAN Clathrin light chain A |Homo sapiens	0.304535
>P49916|DNLI3_HUMAN DNA ligase 3 |Homo sapiens	0.304242
>P37108|SRP14_HUMAN Signal recognition particle 14 kDa protein |Homo sapiens	0.304207
>P00505|AATM_HUMAN Aspartate aminotransferase, mitochondrial |Homo sapiens	0.304084
>Q15181|IPYR_HUMAN Inorganic pyrophosphatase |Homo sapiens	0.303907
>O43818|U3IP2_HUMAN U3 small nucleolar RNA-interacting protein 2 |Homo sapiens	0.303702
>Q8TEQ6|GEMI5_HUMAN Gem-associated protein 5 |Homo sapiens	0.30357
>Q8TB52|FBX30_HUMAN F-box only protein 30 |Homo sapiens	0.303546
>Q9UID3|FFR_HUMAN Protein fat-free homolog |Homo sapiens	0.303524
>P12956|XRCC6_HUMAN X-ray repair cross-complementing protein 6 |Homo sapiens	0.303422
>O43837|IDH3B_HUMAN Isocitrate dehydrogenase [NAD] subunit beta, mitochondrial |Homo sapiens	0.302824
>Q14141|SEPT6_HUMAN Septin-6 |Homo sapiens	0.301769
>P10768|ESTD_HUMAN S-formylglutathione hydrolase |Homo sapiens	0.301143
>Q8NI27|THOC2_HUMAN THO complex subunit 2 |Homo sapiens	0.30102
>P14314|GLU2B_HUMAN Glucosidase 2 subunit beta |Homo sapiens	0.30074
>P27694|RFA1_HUMAN Replication protein A 70 kDa DNA-binding subunit |Homo sapiens	0.298961
>Q92945|FUBP2_HUMAN Far upstream element-binding protein 2 |Homo sapiens	0.298922
>O43660|PLRG1_HUMAN Pleiotropic regulator 1 |Homo sapiens	0.29868
>Q9P2B4|CT2NL_HUMAN CTTNBP2 N-terminal-like protein |Homo sapiens	0.298639
>P26639|SYTC_HUMAN Threonine--tRNA ligase, cytoplasmic |Homo sapiens	0.298501
>Q6AI12|ANR40_HUMAN Ankyrin repeat domain-containing protein 40 |Homo sapiens	0.298406
>Q07866|KLC1_HUMAN Kinesin light chain 1 |Homo sapiens	0.298342
>P62140|PP1B_HUMAN Serine/threonine-protein phosphatase PP1-beta catalytic subunit |Homo sapiens	0.298159
>O15226|NKRF_HUMAN NF-kappa-B-repressing factor |Homo sapiens	0.298037
>P11142|HSP7C_HUMAN Heat shock cognate 71 kDa protein |Homo sapiens;>P54652|HSP72_HUMAN Heat shock-related 70 kDa protein 2 |Homo sapiens;>P08107|HSP71_HUMAN Heat shock 70 kDa protein 1A/1B |Homo sapiens;>P17066|HSP76_HUMAN Heat shock 70 kDa protein 6 |Hom	0.297932
>Q96ST3|SIN3A_HUMAN Paired amphipathic helix protein Sin3a |Homo sapiens	0.297831
>Q9Y6I3|EPN1_HUMAN Epsin-1 |Homo sapiens	0.297229
>P31939|PUR9_HUMAN Bifunctional purine biosynthesis protein PURH |Homo sapiens	0.296055
>Q9UHD8|SEPT9_HUMAN Septin-9 |Homo sapiens	0.295066
>P07900|HS90A_HUMAN Heat shock protein HSP 90-alpha |Homo sapiens;>Q58FG0|HS905_HUMAN Putative heat shock protein HSP 90-alpha A5 |Homo sapiens	0.294765
>Q9UPY3|DICER_HUMAN Endoribonuclease Dicer |Homo sapiens	0.294459
>P19784|CSK22_HUMAN Casein kinase II subunit alpha |Homo sapiens	0.294379
>P00338|LDHA_HUMAN L-lactate dehydrogenase A chain |Homo sapiens	0.293808
>Q92599|SEPT8_HUMAN Septin-8 |Homo sapiens;>Q9NVA2|SEP11_HUMAN Septin-11 |Homo sapiens;>Q14141|SEPT6_HUMAN Septin-6 |Homo sapiens	0.293363
>P43487|RANG_HUMAN Ran-specific GTPase-activating protein |Homo sapiens	0.292264
>Q9NQW7|XPP1_HUMAN Xaa-Pro aminopeptidase 1 |Homo sapiens	0.292004
>P10155|RO60_HUMAN 60 kDa SS-A/Ro ribonucleoprotein |Homo sapiens	0.291238
>Q9H0D6|XRN2_HUMAN 5-3 exoribonuclease 2 |Homo sapiens	0.291211
>Q8IYD1|ERF3B_HUMAN Eukaryotic peptide chain release factor GTP-binding subunit ERF3B |Homo sapiens;>P15170|ERF3A_HUMAN Eukaryotic peptide chain release factor GTP-binding subunit ERF3A |Homo sapiens	0.290897
>P33240|CSTF2_HUMAN Cleavage stimulation factor subunit 2 |Homo sapiens;>Q9H0L4|CSTFT_HUMAN Cleavage stimulation factor subunit 2 tau variant |Homo sapiens	0.290612
>P21333|FLNA_HUMAN Filamin-A |Homo sapiens;>Q14315|FLNC_HUMAN Filamin-C |Homo sapiens	0.290409
>O00203|AP3B1_HUMAN AP-3 complex subunit beta-1 |Homo sapiens	0.290404
>Q93045|STMN2_HUMAN Stathmin-2 |Homo sapiens	0.289066
>Q99536|VAT1_HUMAN Synaptic vesicle membrane protein VAT-1 homolog |Homo sapiens	0.288875
>P15531|NDKA_HUMAN Nucleoside diphosphate kinase A |Homo sapiens	0.288494
>Q15291|RBBP5_HUMAN Retinoblastoma-binding protein 5 |Homo sapiens	0.288025
>P04406|G3P_HUMAN Glyceraldehyde-3-phosphate dehydrogenase |Homo sapiens;>O14556|G3PT_HUMAN Glyceraldehyde-3-phosphate dehydrogenase, testis-specific |Homo sapiens	0.28789
>Q9P0U4|CXXC1_HUMAN CpG-binding protein |Homo sapiens	0.287676
>Q9Y2T2|AP3M1_HUMAN AP-3 complex subunit mu-1 |Homo sapiens	0.28762
>O15042|SR140_HUMAN U2 snRNP-associated SURP motif-containing protein |Homo sapiens	0.287378
>Q5T200|ZC3HD_HUMAN Zinc finger CCCH domain-containing protein 13 |Homo sapiens	0.287087
>P29692|EF1D_HUMAN Elongation factor 1-delta |Homo sapiens	0.286011
>Q9BUJ2|HNRL1_HUMAN Heterogeneous nuclear ribonucleoprotein U-like protein 1 |Homo sapiens	0.284422
>P30837|AL1B1_HUMAN Aldehyde dehydrogenase X, mitochondrial |Homo sapiens	0.283634
>O75390|CISY_HUMAN Citrate synthase, mitochondrial |Homo sapiens	0.28298
>Q8WU90|ZC3HF_HUMAN Zinc finger CCCH domain-containing protein 15 |Homo sapiens	0.282785
>Q8TD19|NEK9_HUMAN Serine/threonine-protein kinase Nek9 |Homo sapiens	0.282717
>P26599|PTBP1_HUMAN Polypyrimidine tract-binding protein 1 |Homo sapiens	0.281937
>Q92841|DDX17_HUMAN Probable ATP-dependent RNA helicase DDX17 |Homo sapiens	0.281686
>P31946|1433B_HUMAN 14-3-3 protein beta/alpha |Homo sapiens;>P61981|1433G_HUMAN 14-3-3 protein gamma |Homo sapiens	0.28112
>O00629|IMA4_HUMAN Importin subunit alpha-4 |Homo sapiens	0.281088
>Q92747|ARC1A_HUMAN Actin-related protein 2/3 complex subunit 1A |Homo sapiens	0.278943
>Q16555|DPYL2_HUMAN Dihydropyrimidinase-related protein 2 |Homo sapiens;>Q14195|DPYL3_HUMAN Dihydropyrimidinase-related protein 3 |Homo sapiens	0.27782
>Q9Y4E1|FA21C_HUMAN WASH complex subunit FAM21C |Homo sapiens	0.277567
>Q13867|BLMH_HUMAN Bleomycin hydrolase |Homo sapiens	0.277351
>A5PLN9|CE044_HUMAN UPF0533 protein C5orf44 |Homo sapiens	0.276536
>P62306|RUXF_HUMAN Small nuclear ribonucleoprotein F |Homo sapiens	0.276527
>Q8TC07|TBC15_HUMAN TBC1 domain family member 15 |Homo sapiens	0.275854
>Q8N7H5|PAF1_HUMAN RNA polymerase II-associated factor 1 homolog |Homo sapiens	0.275132
>P09960|LKHA4_HUMAN Leukotriene A-4 hydrolase |Homo sapiens	0.2744
>P55786|PSA_HUMAN Puromycin-sensitive aminopeptidase |Homo sapiens	0.274275
>P29401|TKT_HUMAN Transketolase |Homo sapiens	0.272401
>P23921|RIR1_HUMAN Ribonucleoside-diphosphate reductase large subunit |Homo sapiens	0.272353
>Q9NWV8|BABA1_HUMAN BRISC and BRCA1-A complex member 1 |Homo sapiens	0.272085
>P49915|GUAA_HUMAN GMP synthase [glutamine-hydrolyzing] |Homo sapiens	0.271834
>Q9UBS4|DJB11_HUMAN DnaJ homolog subfamily B member 11 |Homo sapiens	0.271447
>P31153|METK2_HUMAN S-adenosylmethionine synthase isoform type-2 |Homo sapiens	0.269684
>P31948|STIP1_HUMAN Stress-induced-phosphoprotein 1 |Homo sapiens	0.269344
>O14974|MYPT1_HUMAN Protein phosphatase 1 regulatory subunit 12A |Homo sapiens	0.269233
>P04406|G3P_HUMAN Glyceraldehyde-3-phosphate dehydrogenase |Homo sapiens	0.269195
>Q9Y3A3|PHOCN_HUMAN MOB-like protein phocein |Homo sapiens	0.268254
>P14324|FPPS_HUMAN Farnesyl pyrophosphate synthase |Homo sapiens	0.26802
>Q9NQS1|AVEN_HUMAN Cell death regulator Aven |Homo sapiens	0.266506
>Q92747|ARC1A_HUMAN Actin-related protein 2/3 complex subunit 1A |Homo sapiens;>O15143|ARC1B_HUMAN Actin-related protein 2/3 complex subunit 1B |Homo sapiens	0.266105
>P61158|ARP3_HUMAN Actin-related protein 3 |Homo sapiens	0.265658
>Q9UBT2|SAE2_HUMAN SUMO-activating enzyme subunit 2 |Homo sapiens	0.263735
>Q9NR45|SIAS_HUMAN Sialic acid synthase |Homo sapiens	0.263638
>Q99714|HCD2_HUMAN 3-hydroxyacyl-CoA dehydrogenase type-2 |Homo sapiens	0.263313
>Q13185|CBX3_HUMAN Chromobox protein homolog 3 |Homo sapiens	0.263172
>P49411|EFTU_HUMAN Elongation factor Tu, mitochondrial |Homo sapiens	0.261665
>P35080|PROF2_HUMAN Profilin-2 |Homo sapiens	0.261528
>Q9Y2Z0|SUGT1_HUMAN Suppressor of G2 allele of SKP1 homolog |Homo sapiens	0.261333
>P08243|ASNS_HUMAN Asparagine synthetase [glutamine-hydrolyzing] |Homo sapiens	0.260549
>P50213|IDH3A_HUMAN Isocitrate dehydrogenase [NAD] subunit alpha, mitochondrial |Homo sapiens	0.259878
>Q15910|EZH2_HUMAN Histone-lysine N-methyltransferase EZH2 |Homo sapiens;>Q92800|EZH1_HUMAN Histone-lysine N-methyltransferase EZH1 |Homo sapiens	0.259017
>P32119|PRDX2_HUMAN Peroxiredoxin-2 |Homo sapiens	0.258972
>O75934|SPF27_HUMAN Pre-mRNA-splicing factor SPF27 |Homo sapiens	0.258901
>P30837|AL1B1_HUMAN Aldehyde dehydrogenase X, mitochondrial |Homo sapiens;>O94788|AL1A2_HUMAN Retinal dehydrogenase 2 |Homo sapiens	0.2583
>Q92599|SEPT8_HUMAN Septin-8 |Homo sapiens;>Q9NVA2|SEP11_HUMAN Septin-11 |Homo sapiens	0.257827
>Q9NZL9|MAT2B_HUMAN Methionine adenosyltransferase 2 subunit beta |Homo sapiens	0.257442
>O00571|DDX3X_HUMAN ATP-dependent RNA helicase DDX3X |Homo sapiens;>O15523|DDX3Y_HUMAN ATP-dependent RNA helicase DDX3Y |Homo sapiens	0.257417
>Q9NPE3|NOP10_HUMAN H/ACA ribonucleoprotein complex subunit 3 |Homo sapiens	0.256881
>Q12931|TRAP1_HUMAN Heat shock protein 75 kDa, mitochondrial |Homo sapiens	0.256781
>P36873|PP1G_HUMAN Serine/threonine-protein phosphatase PP1-gamma catalytic subunit |Homo sapiens	0.255162
>P63261|ACTG_HUMAN Actin, cytoplasmic 2 |Homo sapiens	0.254578
>Q16531|DDB1_HUMAN DNA damage-binding protein 1 |Homo sapiens	0.254543
>Q9P2I0|CPSF2_HUMAN Cleavage and polyadenylation specificity factor subunit 2 |Homo sapiens	0.25439
>P14625|ENPL_HUMAN Endoplasmin |Homo sapiens;>Q58FF3|ENPLL_HUMAN Putative endoplasmin-like protein |Homo sapiens	0.254222
>O15143|ARC1B_HUMAN Actin-related protein 2/3 complex subunit 1B |Homo sapiens	0.254072
>P37837|TALDO_HUMAN Transaldolase |Homo sapiens	0.253325
>Q9UJA5|TRM6_HUMAN tRNA (adenine(58)-N(1))-methyltransferase non-catalytic subunit TRM6 |Homo sapiens	0.252878
>O75937|DNJC8_HUMAN DnaJ homolog subfamily C member 8 |Homo sapiens	0.251728
>Q15019|SEPT2_HUMAN Septin-2 |Homo sapiens	0.251099
>P48637|GSHB_HUMAN Glutathione synthetase |Homo sapiens	0.25091
>O15067|PUR4_HUMAN Phosphoribosylformylglycinamidine synthase |Homo sapiens	0.250215
>Q10570|CPSF1_HUMAN Cleavage and polyadenylation specificity factor subunit 1 |Homo sapiens	0.250058
>P06744|G6PI_HUMAN Glucose-6-phosphate isomerase |Homo sapiens	0.249936
>Q96MF7|NSE2_HUMAN E3 SUMO-protein ligase NSE2 |Homo sapiens	0.249781
>O43175|SERA_HUMAN D-3-phosphoglycerate dehydrogenase |Homo sapiens	0.249606
>Q9Y3Y2|CHTOP_HUMAN Chromatin target of PRMT1 protein |Homo sapiens	0.249031
>Q9GZS1|RPA49_HUMAN DNA-directed RNA polymerase I subunit RPA49 |Homo sapiens	0.248218
>P00491|PNPH_HUMAN Purine nucleoside phosphorylase |Homo sapiens	0.248084
>P24752|THIL_HUMAN Acetyl-CoA acetyltransferase, mitochondrial |Homo sapiens	0.247211
>P46926|GNPI1_HUMAN Glucosamine-6-phosphate isomerase 1 |Homo sapiens	0.246408
>O60264|SMCA5_HUMAN SWI/SNF-related matrix-associated actin-dependent regulator of chromatin subfamily A member 5 |Homo sapiens	0.245769
>P04075|ALDOA_HUMAN Fructose-bisphosphate aldolase A |Homo sapiens	0.245404
>Q8TBC4|UBA3_HUMAN NEDD8-activating enzyme E1 catalytic subunit |Homo sapiens	0.243862
>Q9NP97|DLRB1_HUMAN Dynein light chain roadblock-type 1 |Homo sapiens	0.243418
>P23588|IF4B_HUMAN Eukaryotic translation initiation factor 4B |Homo sapiens	0.240813
>Q06124|PTN11_HUMAN Tyrosine-protein phosphatase non-receptor type 11 |Homo sapiens	0.240746
>Q13409|DC1I2_HUMAN Cytoplasmic dynein 1 intermediate chain 2 |Homo sapiens	0.240649
>Q9Y6W5|WASF2_HUMAN Wiskott-Aldrich syndrome protein family member 2 |Homo sapiens	0.240177
>Q14444|CAPR1_HUMAN Caprin-1 |Homo sapiens	0.240166
>Q8WYQ5|DGCR8_HUMAN Microprocessor complex subunit DGCR8 |Homo sapiens	0.240111
>Q6ZW49|PAXI1_HUMAN PAX-interacting protein 1 |Homo sapiens	0.239164
>P14625|ENPL_HUMAN Endoplasmin |Homo sapiens	0.239104
>P42771|CD2A1_HUMAN Cyclin-dependent kinase inhibitor 2A, isoforms 1/2/3 |Homo sapiens;>P42772|CDN2B_HUMAN Cyclin-dependent kinase 4 inhibitor B |Homo sapiens	0.238982
>Q13330|MTA1_HUMAN Metastasis-associated protein MTA1 |Homo sapiens	0.238623
>Q9Y5Q9|TF3C3_HUMAN General transcription factor 3C polypeptide 3 |Homo sapiens	0.238492
>O14531|DPYL4_HUMAN Dihydropyrimidinase-related protein 4 |Homo sapiens	0.237712
>P49366|DHYS_HUMAN Deoxyhypusine synthase |Homo sapiens	0.237458
>Q06265|EXOS9_HUMAN Exosome complex component RRP45 |Homo sapiens;>Q6EMK4|VASN_HUMAN Vasorin |Homo sapiens	0.237444
>Q9UHD9|UBQL2_HUMAN Ubiquilin-2 |Homo sapiens	0.237211
>O75348|VATG1_HUMAN V-type proton ATPase subunit G 1 |Homo sapiens	0.23702
>Q16181|SEPT7_HUMAN Septin-7 |Homo sapiens	0.236623
>Q9BWD1|THIC_HUMAN Acetyl-CoA acetyltransferase, cytosolic |Homo sapiens	0.23566
>P0DI81|TPC2A_HUMAN Trafficking protein particle complex subunit 2 |Homo sapiens;>P0DI82|TPC2B_HUMAN Trafficking protein particle complex subunit 2 protein TRAPPC2P1 |Homo sapiens	0.235442
>O15047|SET1A_HUMAN Histone-lysine N-methyltransferase SETD1A |Homo sapiens	0.235419
>Q99598|TSNAX_HUMAN Translin-associated protein X |Homo sapiens	0.234499
>Q8WWM7|ATX2L_HUMAN Ataxin-2-like protein |Homo sapiens	0.234286
>P12532|KCRU_HUMAN Creatine kinase U-type, mitochondrial |Homo sapiens	0.233607
>Q9UKK9|NUDT5_HUMAN ADP-sugar pyrophosphatase |Homo sapiens	0.233447
>Q96MX6|WDR92_HUMAN WD repeat-containing protein 92 |Homo sapiens	0.233286
>Q9Y3D0|MIP18_HUMAN Mitotic spindle-associated MMXD complex subunit MIP18 |Homo sapiens	0.233155
>Q04637|IF4G1_HUMAN Eukaryotic translation initiation factor 4 gamma 1 |Homo sapiens	0.23305
>P18669|PGAM1_HUMAN Phosphoglycerate mutase 1 |Homo sapiens;>P15259|PGAM2_HUMAN Phosphoglycerate mutase 2 |Homo sapiens	0.233
>O60306|AQR_HUMAN Intron-binding protein aquarius |Homo sapiens	0.231123
>Q99873|ANM1_HUMAN Protein arginine N-methyltransferase 1 |Homo sapiens;>Q9NR22|ANM8_HUMAN Protein arginine N-methyltransferase 8 |Homo sapiens	0.231123
>P17858|K6PL_HUMAN 6-phosphofructokinase, liver type |Homo sapiens;>P08237|K6PF_HUMAN 6-phosphofructokinase, muscle type |Homo sapiens	0.231123
>Q09428|ABCC8_HUMAN ATP-binding cassette sub-family C member 8 |Homo sapiens	0.231123
>O14981|BTAF1_HUMAN TATA-binding protein-associated factor 172 |Homo sapiens	0.231123
>Q9UKV8|AGO2_HUMAN Protein argonaute-2 |Homo sapiens;>Q9H9G7|AGO3_HUMAN Protein argonaute-3 |Homo sapiens;>Q9UL18|AGO1_HUMAN Protein argonaute-1 |Homo sapiens	0.231123
>Q99996|AKAP9_HUMAN A-kinase anchor protein 9 |Homo sapiens;>Q8NEG4|FA83F_HUMAN Protein FAM83F |Homo sapiens	0.231123
>Q7Z417|NUFP2_HUMAN Nuclear fragile X mental retardation-interacting protein 2 |Homo sapiens	0.231123
>Q5VZL5|ZMYM4_HUMAN Zinc finger MYM-type protein 4 |Homo sapiens;>Q14202|ZMYM3_HUMAN Zinc finger MYM-type protein 3 |Homo sapiens	0.231123
>P19447|ERCC3_HUMAN TFIIH basal transcription factor complex helicase XPB subunit |Homo sapiens	0.231123
>P63151|2ABA_HUMAN Serine/threonine-protein phosphatase 2A 55 kDa regulatory subunit B alpha isoform |Homo sapiens;>Q66LE6|2ABD_HUMAN Serine/threonine-protein phosphatase 2A 55 kDa regulatory subunit B delta isoform |Homo sapiens	0.231123
>P46940|IQGA1_HUMAN Ras GTPase-activating-like protein IQGAP1 |Homo sapiens;>Q86VI3|IQGA3_HUMAN Ras GTPase-activating-like protein IQGAP3 |Homo sapiens;>Q13576|IQGA2_HUMAN Ras GTPase-activating-like protein IQGAP2 |Homo sapiens	0.231123
>P30837|AL1B1_HUMAN Aldehyde dehydrogenase X, mitochondrial |Homo sapiens;>P47895|AL1A3_HUMAN Aldehyde dehydrogenase family 1 member A3 |Homo sapiens;>O94788|AL1A2_HUMAN Retinal dehydrogenase 2 |Homo sapiens;>P05091|ALDH2_HUMAN Aldehyde dehydrogenase, mito	0.231123
>O60333|KIF1B_HUMAN Kinesin-like protein KIF1B |Homo sapiens	0.231123
>Q04726|TLE3_HUMAN Transducin-like enhancer protein 3 |Homo sapiens;>Q04727|TLE4_HUMAN Transducin-like enhancer protein 4 |Homo sapiens;>Q04724|TLE1_HUMAN Transducin-like enhancer protein 1 |Homo sapiens	0.231123
>Q01082|SPTB2_HUMAN Spectrin beta chain, brain 1 |Homo sapiens;>Q9H254|SPTN4_HUMAN Spectrin beta chain, brain 3 |Homo sapiens	0.231123
>Q16881|TRXR1_HUMAN Thioredoxin reductase 1, cytoplasmic |Homo sapiens	0.231123
>O60343|TBCD4_HUMAN TBC1 domain family member 4 |Homo sapiens;>Q86TI0|TBCD1_HUMAN TBC1 domain family member 1 |Homo sapiens	0.231123
>P07900|HS90A_HUMAN Heat shock protein HSP 90-alpha |Homo sapiens;>Q14568|HS902_HUMAN Putative heat shock protein HSP 90-alpha A2 |Homo sapiens;>P08238|HS90B_HUMAN Heat shock protein HSP 90-beta |Homo sapiens	0.231123
>Q16555|DPYL2_HUMAN Dihydropyrimidinase-related protein 2 |Homo sapiens	0.230694
>P15311|EZRI_HUMAN Ezrin |Homo sapiens	0.230215
>Q52LJ0|FA98B_HUMAN Protein FAM98B |Homo sapiens	0.230178
>Q9H4L5|OSBL3_HUMAN Oxysterol-binding protein-related protein 3 |Homo sapiens;>Q9BZF2|OSBL7_HUMAN Oxysterol-binding protein-related protein 7 |Homo sapiens	0.229697
>P60842|IF4A1_HUMAN Eukaryotic initiation factor 4A-I |Homo sapiens	0.229469
>Q9BPW8|NIPS1_HUMAN Protein NipSnap homolog 1 |Homo sapiens	0.229173
>A6NHR9|SMHD1_HUMAN Structural maintenance of chromosomes flexible hinge domain-containing protein 1 |Homo sapiens	0.228835
>Q6WCQ1|MPRIP_HUMAN Myosin phosphatase Rho-interacting protein |Homo sapiens	0.228689
>Q06830|PRDX1_HUMAN Peroxiredoxin-1 |Homo sapiens;>Q13162|PRDX4_HUMAN Peroxiredoxin-4 |Homo sapiens	0.228429
>O00754|MA2B1_HUMAN Lysosomal alpha-mannosidase |Homo sapiens	0.227738
>P37802|TAGL2_HUMAN Transgelin-2 |Homo sapiens;>Q9UI15|TAGL3_HUMAN Transgelin-3 |Homo sapiens	0.227381
>P46777|RL5_HUMAN 60S ribosomal protein L5 |Homo sapiens	0.227186
>Q9H4A4|AMPB_HUMAN Aminopeptidase B |Homo sapiens	0.226704
>P46926|GNPI1_HUMAN Glucosamine-6-phosphate isomerase 1 |Homo sapiens;>Q8TDQ7|GNPI2_HUMAN Glucosamine-6-phosphate isomerase 2 |Homo sapiens	0.226686
>Q92599|SEPT8_HUMAN Septin-8 |Homo sapiens	0.225418
>Q96AE4|FUBP1_HUMAN Far upstream element-binding protein 1 |Homo sapiens	0.225057
>P18669|PGAM1_HUMAN Phosphoglycerate mutase 1 |Homo sapiens	0.224296
>Q9UNE7|CHIP_HUMAN E3 ubiquitin-protein ligase CHIP |Homo sapiens	0.223837
>Q5SSJ5|HP1B3_HUMAN Heterochromatin protein 1-binding protein 3 |Homo sapiens	0.223724
>P46379|BAG6_HUMAN Large proline-rich protein BAG6 |Homo sapiens	0.223167
>P25205|MCM3_HUMAN DNA replication licensing factor MCM3 |Homo sapiens	0.222946
>Q9P260|K1468_HUMAN LisH domain and HEAT repeat-containing protein KIAA1468 |Homo sapiens	0.222914
>P50502|F10A1_HUMAN Hsc70-interacting protein |Homo sapiens;>Q8NFI4|F10A5_HUMAN Putative protein FAM10A5 |Homo sapiens;>Q8IZP2|ST134_HUMAN Putative protein FAM10A4 |Homo sapiens	0.22217
>Q9BPX5|ARP5L_HUMAN Actin-related protein 2/3 complex subunit 5-like protein |Homo sapiens	0.22183
>P07686|HEXB_HUMAN Beta-hexosaminidase subunit beta |Homo sapiens	0.221594
>P61758|PFD3_HUMAN Prefoldin subunit 3 |Homo sapiens	0.22104
>P14618|KPYM_HUMAN Pyruvate kinase isozymes M1/M2 |Homo sapiens	0.220804
>Q96RL1|UIMC1_HUMAN BRCA1-A complex subunit RAP80 |Homo sapiens	0.2207
>Q9BXV9|CN142_HUMAN Uncharacterized protein C14orf142 |Homo sapiens	0.220128
>Q9H3G5|CPVL_HUMAN Probable serine carboxypeptidase CPVL |Homo sapiens	0.21893
>O15084|ANR28_HUMAN Serine/threonine-protein phosphatase 6 regulatory ankyrin repeat subunit A |Homo sapiens;>Q8NB46|ANR52_HUMAN Serine/threonine-protein phosphatase 6 regulatory ankyrin repeat subunit C |Homo sapiens	0.218379
>P07237|PDIA1_HUMAN Protein disulfide-isomerase |Homo sapiens	0.218206
>Q96N67|DOCK7_HUMAN Dedicator of cytokinesis protein 7 |Homo sapiens;>Q96HP0|DOCK6_HUMAN Dedicator of cytokinesis protein 6 |Homo sapiens	0.217952
>ENSEMBL:ENSBTAP00000016242 (Bos taurus) similar to alpha-tubulin I isoform 1;>P68363|TBA1B_HUMAN Tubulin alpha-1B chain |Homo sapiens;>P68366|TBA4A_HUMAN Tubulin alpha-4A chain |Homo sapiens;>Q71U36|TBA1A_HUMAN Tubulin alpha-1A chain |Homo sapiens;>Q9BQE3	0.217616
>Q9Y3I0|RTCB_HUMAN tRNA-splicing ligase RtcB homolog |Homo sapiens	0.217335
>P28340|DPOD1_HUMAN DNA polymerase delta catalytic subunit |Homo sapiens	0.216394
>P61962|DCAF7_HUMAN DDB1- and CUL4-associated factor 7 |Homo sapiens	0.216329
>O60925|PFD1_HUMAN Prefoldin subunit 1 |Homo sapiens	0.216028
>P06132|DCUP_HUMAN Uroporphyrinogen decarboxylase |Homo sapiens	0.215756
>Q00341|VIGLN_HUMAN Vigilin |Homo sapiens	0.215255
>Q9UKX7|NUP50_HUMAN Nuclear pore complex protein Nup50 |Homo sapiens	0.215246
>Q01081|U2AF1_HUMAN Splicing factor U2AF 35 kDa subunit |Homo sapiens	0.214587
>P49643|PRI2_HUMAN DNA primase large subunit |Homo sapiens	0.21409
>P31942|HNRH3_HUMAN Heterogeneous nuclear ribonucleoprotein H3 |Homo sapiens	0.212656
>O43823|AKAP8_HUMAN A-kinase anchor protein 8 |Homo sapiens	0.212609
>Q86VP6|CAND1_HUMAN Cullin-associated NEDD8-dissociated protein 1 |Homo sapiens	0.211425
>Q15334|L2GL1_HUMAN Lethal(2) giant larvae protein homolog 1 |Homo sapiens	0.21118
>P23381|SYWC_HUMAN Tryptophan--tRNA ligase, cytoplasmic |Homo sapiens	0.211044
>P26038|MOES_HUMAN Moesin |Homo sapiens	0.211007
>Q6IBW4|CNDH2_HUMAN Condensin-2 complex subunit H2 |Homo sapiens	0.210965
>P30520|PURA2_HUMAN Adenylosuccinate synthetase isozyme 2 |Homo sapiens	0.210707
>Q9BVC5|ASHWN_HUMAN Ashwin |Homo sapiens	0.20905
>Q9H444|CHM4B_HUMAN Charged multivesicular body protein 4b |Homo sapiens	0.208917
>P46063|RECQ1_HUMAN ATP-dependent DNA helicase Q1 |Homo sapiens	0.207758
>O00410|IPO5_HUMAN Importin-5 |Homo sapiens;>O60518|RNBP6_HUMAN Ran-binding protein 6 |Homo sapiens	0.20691
>P40926|MDHM_HUMAN Malate dehydrogenase, mitochondrial |Homo sapiens	0.206839
>Q14249|NUCG_HUMAN Endonuclease G, mitochondrial |Homo sapiens	0.206685
>P19838|NFKB1_HUMAN Nuclear factor NF-kappa-B p105 subunit |Homo sapiens	0.206565
>P49792|RBP2_HUMAN E3 SUMO-protein ligase RanBP2 |Homo sapiens;>O14715|RGPD8_HUMAN RANBP2-like and GRIP domain-containing protein 8 |Homo sapiens;>A6NKT7|RGPD3_HUMAN RanBP2-like and GRIP domain-containing protein 3 |Homo sapiens	0.204445
>Q8NFH4|NUP37_HUMAN Nucleoporin Nup37 |Homo sapiens	0.203597
>O95347|SMC2_HUMAN Structural maintenance of chromosomes protein 2 |Homo sapiens;>Q8IYE0|CC146_HUMAN Coiled-coil domain-containing protein 146 |Homo sapiens;>Q8NEM0|MCPH1_HUMAN Microcephalin |Homo sapiens	0.203234
>P11142|HSP7C_HUMAN Heat shock cognate 71 kDa protein |Homo sapiens;>P54652|HSP72_HUMAN Heat shock-related 70 kDa protein 2 |Homo sapiens	0.201403
>O60341|KDM1A_HUMAN Lysine-specific histone demethylase 1A |Homo sapiens	0.201152
>Q6ZN18|AEBP2_HUMAN Zinc finger protein AEBP2 |Homo sapiens	0.200902
>Q15910|EZH2_HUMAN Histone-lysine N-methyltransferase EZH2 |Homo sapiens	0.200814
>P50502|F10A1_HUMAN Hsc70-interacting protein |Homo sapiens;>Q8NFI4|F10A5_HUMAN Putative protein FAM10A5 |Homo sapiens	0.200789
>P08107|HSP71_HUMAN Heat shock 70 kDa protein 1A/1B |Homo sapiens	0.200609
>Q06830|PRDX1_HUMAN Peroxiredoxin-1 |Homo sapiens	0.199843
>Q9P2D3|HTR5B_HUMAN HEAT repeat-containing protein 5B |Homo sapiens	0.197688
>P11766|ADHX_HUMAN Alcohol dehydrogenase class-3 |Homo sapiens	0.197175
>P09622|DLDH_HUMAN Dihydrolipoyl dehydrogenase, mitochondrial |Homo sapiens	0.196221
>Q14669|TRIPC_HUMAN Probable E3 ubiquitin-protein ligase TRIP12 |Homo sapiens	0.196207
>O75874|IDHC_HUMAN Isocitrate dehydrogenase [NADP] cytoplasmic |Homo sapiens	0.196034
>P13797|PLST_HUMAN Plastin-3 |Homo sapiens	0.195039
>O43776|SYNC_HUMAN Asparagine--tRNA ligase, cytoplasmic |Homo sapiens	0.194228
>Q6IEG0|SNR48_HUMAN U11/U12 small nuclear ribonucleoprotein 48 kDa protein |Homo sapiens	0.193598
>P08559|ODPA_HUMAN Pyruvate dehydrogenase E1 component subunit alpha, somatic form, mitochondrial |Homo sapiens;>P29803|ODPAT_HUMAN Pyruvate dehydrogenase E1 component subunit alpha, testis-specific form, mitochondrial |Homo sapiens	0.192486
>P07900|HS90A_HUMAN Heat shock protein HSP 90-alpha |Homo sapiens;>P08238|HS90B_HUMAN Heat shock protein HSP 90-beta |Homo sapiens;>Q58FF7|H90B3_HUMAN Putative heat shock protein HSP 90-beta-3 |Homo sapiens	0.192044
>P35250|RFC2_HUMAN Replication factor C subunit 2 |Homo sapiens	0.191245
>P28332|ADH6_HUMAN Alcohol dehydrogenase 6 |Homo sapiens	0.191022
>O14519|CDKA1_HUMAN Cyclin-dependent kinase 2-associated protein 1 |Homo sapiens	0.191012
>P41227|NAA10_HUMAN N-alpha-acetyltransferase 10 |Homo sapiens	0.190835
>P62316|SMD2_HUMAN Small nuclear ribonucleoprotein Sm D2 |Homo sapiens	0.190273
>Q9UN86|G3BP2_HUMAN Ras GTPase-activating protein-binding protein 2 |Homo sapiens;>Q13283|G3BP1_HUMAN Ras GTPase-activating protein-binding protein 1 |Homo sapiens	0.189464
>P31153|METK2_HUMAN S-adenosylmethionine synthase isoform type-2 |Homo sapiens;>Q00266|METK1_HUMAN S-adenosylmethionine synthase isoform type-1 |Homo sapiens	0.189328
>P36543|VATE1_HUMAN V-type proton ATPase subunit E 1 |Homo sapiens;>Q96A05|VATE2_HUMAN V-type proton ATPase subunit E 2 |Homo sapiens	0.188683
>P42765|THIM_HUMAN 3-ketoacyl-CoA thiolase, mitochondrial |Homo sapiens	0.188013
>P49458|SRP09_HUMAN Signal recognition particle 9 kDa protein |Homo sapiens	0.187159
>Q7L576|CYFP1_HUMAN Cytoplasmic FMR1-interacting protein 1 |Homo sapiens	0.186602
>Q14146|URB2_HUMAN Unhealthy ribosome biogenesis protein 2 homolog |Homo sapiens	0.186567
>Q9NVA2|SEP11_HUMAN Septin-11 |Homo sapiens	0.186401
>Q15843|NEDD8_HUMAN NEDD8 |Homo sapiens	0.185303
>P14678|RSMB_HUMAN Small nuclear ribonucleoprotein-associated proteins B and B |Homo sapiens;>P63162|RSMN_HUMAN Small nuclear ribonucleoprotein-associated protein N |Homo sapiens	0.185226
>P49419|AL7A1_HUMAN Alpha-aminoadipic semialdehyde dehydrogenase |Homo sapiens	0.185123
>P12694|ODBA_HUMAN 2-oxoisovalerate dehydrogenase subunit alpha, mitochondrial |Homo sapiens	0.184734
>P30084|ECHM_HUMAN Enoyl-CoA hydratase, mitochondrial |Homo sapiens	0.18323
>P58876|H2B1D_HUMAN Histone H2B type 1-D |Homo sapiens;>P62807|H2B1C_HUMAN Histone H2B type 1-C/E/F/G/I |Homo sapiens;>Q5QNW6|H2B2F_HUMAN Histone H2B type 2-F |Homo sapiens;>Q93079|H2B1H_HUMAN Histone H2B type 1-H |Homo sapiens;>Q99877|H2B1N_HUMAN Histone	0.182707
>Q9NXX6|NSE4A_HUMAN Non-structural maintenance of chromosomes element 4 homolog A |Homo sapiens	0.182528
>P23528|COF1_HUMAN Cofilin-1 |Homo sapiens	0.181728
>P13667|PDIA4_HUMAN Protein disulfide-isomerase A4 |Homo sapiens	0.180508
>P11142|HSP7C_HUMAN Heat shock cognate 71 kDa protein |Homo sapiens;>P54652|HSP72_HUMAN Heat shock-related 70 kDa protein 2 |Homo sapiens;>P08107|HSP71_HUMAN Heat shock 70 kDa protein 1A/1B |Homo sapiens;>P11021|GRP78_HUMAN 78 kDa glucose-regulated protein	0.180162
>Q00796|DHSO_HUMAN Sorbitol dehydrogenase |Homo sapiens	0.18012
>P23246|SFPQ_HUMAN Splicing factor, proline- and glutamine-rich |Homo sapiens	0.178754
>P78347|GTF2I_HUMAN General transcription factor II-I |Homo sapiens	0.177418
>Q92786|PROX1_HUMAN Prospero homeobox protein 1 |Homo sapiens	0.176754
>Q8WXX5|DNJC9_HUMAN DnaJ homolog subfamily C member 9 |Homo sapiens	0.176429
>Q15056|IF4H_HUMAN Eukaryotic translation initiation factor 4H |Homo sapiens	0.176143
>P41227|NAA10_HUMAN N-alpha-acetyltransferase 10 |Homo sapiens;>Q9BSU3|NAA11_HUMAN N-alpha-acetyltransferase 11 |Homo sapiens	0.175882
>P11310|ACADM_HUMAN Medium-chain specific acyl-CoA dehydrogenase, mitochondrial |Homo sapiens	0.175536
>Q9BT25|HAUS8_HUMAN HAUS augmin-like complex subunit 8 |Homo sapiens	0.175074
>Q9H9L4|CL041_HUMAN Uncharacterized protein C12orf41 |Homo sapiens	0.174764
>P26358|DNMT1_HUMAN DNA (cytosine-5)-methyltransferase 1 |Homo sapiens	0.174715
>P17066|HSP76_HUMAN Heat shock 70 kDa protein 6 |Homo sapiens;>P48741|HSP77_HUMAN Putative heat shock 70 kDa protein 7 |Homo sapiens	0.174605
>Q9Y285|SYFA_HUMAN Phenylalanine--tRNA ligase alpha subunit |Homo sapiens	0.174089
>P09429|HMGB1_HUMAN High mobility group protein B1 |Homo sapiens	0.173076
>Q99733|NP1L4_HUMAN Nucleosome assembly protein 1-like 4 |Homo sapiens	0.172504
>Q9H269|VPS16_HUMAN Vacuolar protein sorting-associated protein 16 homolog |Homo sapiens	0.170904
>Q8N684|CPSF7_HUMAN Cleavage and polyadenylation specificity factor subunit 7 |Homo sapiens	0.170394
>P08238|HS90B_HUMAN Heat shock protein HSP 90-beta |Homo sapiens;>Q58FF7|H90B3_HUMAN Putative heat shock protein HSP 90-beta-3 |Homo sapiens	0.170279
>Q9GZU8|F192A_HUMAN Protein FAM192A |Homo sapiens	0.170186
>O75153|K0664_HUMAN Protein KIAA0664 |Homo sapiens	0.169607
>O00299|CLIC1_HUMAN Chloride intracellular channel protein 1 |Homo sapiens	0.169455
>P62318|SMD3_HUMAN Small nuclear ribonucleoprotein Sm D3 |Homo sapiens	0.169304
>Q13547|HDAC1_HUMAN Histone deacetylase 1 |Homo sapiens;>Q92769|HDAC2_HUMAN Histone deacetylase 2 |Homo sapiens	0.168297
>P23368|MAOM_HUMAN NAD-dependent malic enzyme, mitochondrial |Homo sapiens	0.167903
>Q9UFN0|NPS3A_HUMAN Protein NipSnap homolog 3A |Homo sapiens	0.16767
>P46060|RAGP1_HUMAN Ran GTPase-activating protein 1 |Homo sapiens	0.167135
>P09012|SNRPA_HUMAN U1 small nuclear ribonucleoprotein A |Homo sapiens	0.166792
>Q8NFC6|BOD1L_HUMAN Biorientation of chromosomes in cell division protein 1-like |Homo sapiens	0.166641
>P17858|K6PL_HUMAN 6-phosphofructokinase, liver type |Homo sapiens	0.166637
>P13797|PLST_HUMAN Plastin-3 |Homo sapiens;>P13796|PLSL_HUMAN Plastin-2 |Homo sapiens	0.166627
>Q8NBS9|TXND5_HUMAN Thioredoxin domain-containing protein 5 |Homo sapiens	0.166495
>P07900|HS90A_HUMAN Heat shock protein HSP 90-alpha |Homo sapiens;>P08238|HS90B_HUMAN Heat shock protein HSP 90-beta |Homo sapiens	0.16533
>Q06830|PRDX1_HUMAN Peroxiredoxin-1 |Homo sapiens;>P32119|PRDX2_HUMAN Peroxiredoxin-2 |Homo sapiens	0.164808
>P00558|PGK1_HUMAN Phosphoglycerate kinase 1 |Homo sapiens;>P07205|PGK2_HUMAN Phosphoglycerate kinase 2 |Homo sapiens	0.164349
>Q86YP4|P66A_HUMAN Transcriptional repressor p66-alpha |Homo sapiens;>Q8WXI9|P66B_HUMAN Transcriptional repressor p66-beta |Homo sapiens	0.163637
>Q5VTR2|BRE1A_HUMAN E3 ubiquitin-protein ligase BRE1A |Homo sapiens	0.162208
>Q9NX55|HYPK_HUMAN Huntingtin-interacting protein K |Homo sapiens	0.162033
>O60749|SNX2_HUMAN Sorting nexin-2 |Homo sapiens	0.162022
>O75521|ECI2_HUMAN Enoyl-CoA delta isomerase 2, mitochondrial |Homo sapiens	0.1616
>P12277|KCRB_HUMAN Creatine kinase B-type |Homo sapiens	0.159603
>P17174|AATC_HUMAN Aspartate aminotransferase, cytoplasmic |Homo sapiens	0.159113
>O60814|H2B1K_HUMAN Histone H2B type 1-K |Homo sapiens;>P57053|H2BFS_HUMAN Histone H2B type F-S |Homo sapiens	0.158781
>Q13045|FLII_HUMAN Protein flightless-1 homolog |Homo sapiens	0.158225
>O75083|WDR1_HUMAN WD repeat-containing protein 1 |Homo sapiens	0.158021
>Q92769|HDAC2_HUMAN Histone deacetylase 2 |Homo sapiens	0.157281
>Q96KP4|CNDP2_HUMAN Cytosolic non-specific dipeptidase |Homo sapiens	0.156384
>Q9Y3F4|STRAP_HUMAN Serine-threonine kinase receptor-associated protein |Homo sapiens	0.156022
>Q16658|FSCN1_HUMAN Fascin |Homo sapiens	0.155609
>O75376|NCOR1_HUMAN Nuclear receptor corepressor 1 |Homo sapiens	0.153001
>Q9UBQ0|VPS29_HUMAN Vacuolar protein sorting-associated protein 29 |Homo sapiens	0.152558
>O43252|PAPS1_HUMAN Bifunctional 3-phosphoadenosine 5-phosphosulfate synthase 1 |Homo sapiens;>O95340|PAPS2_HUMAN Bifunctional 3-phosphoadenosine 5-phosphosulfate synthase 2 |Homo sapiens	0.152014
>P60712 SWISS-PROT:P60712 (Bos taurus) Actin, cytoplasmic 1;>P60709|ACTB_HUMAN Actin, cytoplasmic 1 |Homo sapiens;>Q6S8J3|POTEE_HUMAN POTE ankyrin domain family member E |Homo sapiens;>A5A3E0|POTEF_HUMAN POTE ankyrin domain family member F |Homo sapiens;>P	0.151504
>P07900|HS90A_HUMAN Heat shock protein HSP 90-alpha |Homo sapiens;>Q14568|HS902_HUMAN Putative heat shock protein HSP 90-alpha A2 |Homo sapiens;>P08238|HS90B_HUMAN Heat shock protein HSP 90-beta |Homo sapiens;>Q58FF8|H90B2_HUMAN Putative heat shock protein	0.15144
>P12270|TPR_HUMAN Nucleoprotein TPR |Homo sapiens	0.151377
>P00390|GSHR_HUMAN Glutathione reductase, mitochondrial |Homo sapiens	0.150456
>O43809|CPSF5_HUMAN Cleavage and polyadenylation specificity factor subunit 5 |Homo sapiens	0.150442
>Q8IWZ3|ANKH1_HUMAN Ankyrin repeat and KH domain-containing protein 1 |Homo sapiens;>O75179|ANR17_HUMAN Ankyrin repeat domain-containing protein 17 |Homo sapiens	0.148457
>P09234|RU1C_HUMAN U1 small nuclear ribonucleoprotein C |Homo sapiens	0.148291
>Q9H974|QTRD1_HUMAN Queuine tRNA-ribosyltransferase subunit QTRTD1 |Homo sapiens	0.147129
>P08238|HS90B_HUMAN Heat shock protein HSP 90-beta |Homo sapiens;>Q58FF7|H90B3_HUMAN Putative heat shock protein HSP 90-beta-3 |Homo sapiens;>Q58FF6|H90B4_HUMAN Putative heat shock protein HSP 90-beta 4 |Homo sapiens	0.14671
>Q9UMX0|UBQL1_HUMAN Ubiquilin-1 |Homo sapiens;>Q9UHD9|UBQL2_HUMAN Ubiquilin-2 |Homo sapiens	0.14553
>Q8WVB6|CTF18_HUMAN Chromosome transmission fidelity protein 18 homolog |Homo sapiens	0.143892
>P67775|PP2AA_HUMAN Serine/threonine-protein phosphatase 2A catalytic subunit alpha isoform |Homo sapiens;>P62714|PP2AB_HUMAN Serine/threonine-protein phosphatase 2A catalytic subunit beta isoform |Homo sapiens	0.142187
>P41250|SYG_HUMAN Glycine--tRNA ligase |Homo sapiens	0.139888
>Q13619|CUL4A_HUMAN Cullin-4A |Homo sapiens	0.139038
>O43252|PAPS1_HUMAN Bifunctional 3-phosphoadenosine 5-phosphosulfate synthase 1 |Homo sapiens	0.138946
>P55209|NP1L1_HUMAN Nucleosome assembly protein 1-like 1 |Homo sapiens	0.138437
>P34897|GLYM_HUMAN Serine hydroxymethyltransferase, mitochondrial |Homo sapiens;>P34896|GLYC_HUMAN Serine hydroxymethyltransferase, cytosolic |Homo sapiens	0.138171
>Q9Y5B9|SP16H_HUMAN FACT complex subunit SPT16 |Homo sapiens	0.138157
>Q08J23|NSUN2_HUMAN tRNA (cytosine(34)-C(5))-methyltransferase |Homo sapiens	0.137809
>P55769|NH2L1_HUMAN NHP2-like protein 1 |Homo sapiens	0.13777
>P58876|H2B1D_HUMAN Histone H2B type 1-D |Homo sapiens;>P62807|H2B1C_HUMAN Histone H2B type 1-C/E/F/G/I |Homo sapiens;>Q5QNW6|H2B2F_HUMAN Histone H2B type 2-F |Homo sapiens;>Q93079|H2B1H_HUMAN Histone H2B type 1-H |Homo sapiens;>Q99877|H2B1N_HUMAN Histone	0.135075
>P30048|PRDX3_HUMAN Thioredoxin-dependent peroxide reductase, mitochondrial |Homo sapiens	0.13459
>Q9UN86|G3BP2_HUMAN Ras GTPase-activating protein-binding protein 2 |Homo sapiens	0.133845
>P11021|GRP78_HUMAN 78 kDa glucose-regulated protein |Homo sapiens	0.13369
>O95487|SC24B_HUMAN Protein transport protein Sec24B |Homo sapiens	0.132476
>O15397|IPO8_HUMAN Importin-8 |Homo sapiens	0.130682
>Q16576|RBBP7_HUMAN Histone-binding protein RBBP7 |Homo sapiens	0.129814
>O95602|RPA1_HUMAN DNA-directed RNA polymerase I subunit RPA1 |Homo sapiens	0.129794
>P00558|PGK1_HUMAN Phosphoglycerate kinase 1 |Homo sapiens	0.126733
>P49792|RBP2_HUMAN E3 SUMO-protein ligase RanBP2 |Homo sapiens;>O14715|RGPD8_HUMAN RANBP2-like and GRIP domain-containing protein 8 |Homo sapiens;>P0DJD1|RGPD2_HUMAN RANBP2-like and GRIP domain-containing protein 2 |Homo sapiens;>P0DJD0|RGPD1_HUMAN RANBP2-	0.126417
>Q9NTK5|OLA1_HUMAN Obg-like ATPase 1 |Homo sapiens	0.124628
>P12268|IMDH2_HUMAN Inosine-5-monophosphate dehydrogenase 2 |Homo sapiens;>P20839|IMDH1_HUMAN Inosine-5-monophosphate dehydrogenase 1 |Homo sapiens	0.124076
>Q8IWS0|PHF6_HUMAN PHD finger protein 6 |Homo sapiens	0.124067
>Q9UI30|TR112_HUMAN tRNA methyltransferase 112 homolog |Homo sapiens	0.123869
>P08238|HS90B_HUMAN Heat shock protein HSP 90-beta |Homo sapiens;>Q58FF7|H90B3_HUMAN Putative heat shock protein HSP 90-beta-3 |Homo sapiens;>Q58FF6|H90B4_HUMAN Putative heat shock protein HSP 90-beta 4 |Homo sapiens;>P14625|ENPL_HUMAN Endoplasmin |Homo sa	0.123267
>P68400|CSK21_HUMAN Casein kinase II subunit alpha |Homo sapiens	0.122301
>P40925|MDHC_HUMAN Malate dehydrogenase, cytoplasmic |Homo sapiens	0.122146
>Q9UBE0|SAE1_HUMAN SUMO-activating enzyme subunit 1 |Homo sapiens	0.122051
>O14776|TCRG1_HUMAN Transcription elongation regulator 1 |Homo sapiens	0.121341
>O75607|NPM3_HUMAN Nucleoplasmin-3 |Homo sapiens	0.120979
>P04181|OAT_HUMAN Ornithine aminotransferase, mitochondrial |Homo sapiens	0.120628
>O00267|SPT5H_HUMAN Transcription elongation factor SPT5 |Homo sapiens	0.12024
>Q86W42|THOC6_HUMAN THO complex subunit 6 homolog |Homo sapiens	0.118673
>Q8ND04|SMG8_HUMAN Protein SMG8 |Homo sapiens	0.116784
>Q6P1J9|CDC73_HUMAN Parafibromin |Homo sapiens	0.116121
>P11142|HSP7C_HUMAN Heat shock cognate 71 kDa protein |Homo sapiens;>P54652|HSP72_HUMAN Heat shock-related 70 kDa protein 2 |Homo sapiens;>P17066|HSP76_HUMAN Heat shock 70 kDa protein 6 |Homo sapiens	0.116049
>Q09028|RBBP4_HUMAN Histone-binding protein RBBP4 |Homo sapiens	0.115825
>P43034|LIS1_HUMAN Platelet-activating factor acetylhydrolase IB subunit alpha |Homo sapiens	0.115784
>P18669|PGAM1_HUMAN Phosphoglycerate mutase 1 |Homo sapiens;>P15259|PGAM2_HUMAN Phosphoglycerate mutase 2 |Homo sapiens;>Q8N0Y7|PGAM4_HUMAN Probable phosphoglycerate mutase 4 |Homo sapiens	0.115253
>P67870|CSK2B_HUMAN Casein kinase II subunit beta |Homo sapiens	0.11419
>Q13126|MTAP_HUMAN S-methyl-5-thioadenosine phosphorylase |Homo sapiens	0.111797
>P35251|RFC1_HUMAN Replication factor C subunit 1 |Homo sapiens	0.108655
>Q9Y2D4|EXC6B_HUMAN Exocyst complex component 6B |Homo sapiens	0.107492
>P13647 SWISS-PROT:P13647 Tax_Id=9606 Gene_Symbol=KRT5 Keratin, type II cytoskeletal 5;>P13647|K2C5_HUMAN Keratin, type II cytoskeletal 5 |Homo sapiens;>Q5XQN5 SWISS-PROT:Q5XQN5 (Bos taurus) Keratin, type II cytoskeletal 5;>Q922U2 SWISS-PROT:Q922U2 Tax_Id=	0.107121
>Q7Z6Z7|HUWE1_HUMAN E3 ubiquitin-protein ligase HUWE1 |Homo sapiens	0.107055
>P49792|RBP2_HUMAN E3 SUMO-protein ligase RanBP2 |Homo sapiens;>O14715|RGPD8_HUMAN RANBP2-like and GRIP domain-containing protein 8 |Homo sapiens;>P0DJD1|RGPD2_HUMAN RANBP2-like and GRIP domain-containing protein 2 |Homo sapiens;>P0DJD0|RGPD1_HUMAN RANBP2-	0.105862
>Q9NSK0|KLC4_HUMAN Kinesin light chain 4 |Homo sapiens	0.105168
>P52294|IMA1_HUMAN Importin subunit alpha-1 |Homo sapiens;>O60684|IMA7_HUMAN Importin subunit alpha-7 |Homo sapiens;>O15131|IMA5_HUMAN Importin subunit alpha-6 |Homo sapiens	0.104641
>Q9BTW9|TBCD_HUMAN Tubulin-specific chaperone D |Homo sapiens	0.104491
>Q92688|AN32B_HUMAN Acidic leucine-rich nuclear phosphoprotein 32 family member B |Homo sapiens	0.104431
>P51858|HDGF_HUMAN Hepatoma-derived growth factor |Homo sapiens	0.103398
>P55735|SEC13_HUMAN Protein SEC13 homolog |Homo sapiens	0.102269
>P25685|DNJB1_HUMAN DnaJ homolog subfamily B member 1 |Homo sapiens	0.102246
>Q9C0J8|WDR33_HUMAN pre-mRNA 3 end processing protein WDR33 |Homo sapiens	0.10222
>P11177|ODPB_HUMAN Pyruvate dehydrogenase E1 component subunit beta, mitochondrial |Homo sapiens	0.0990655
>Q9NUP9|LIN7C_HUMAN Protein lin-7 homolog C |Homo sapiens	0.0970759
>O43488|ARK72_HUMAN Aflatoxin B1 aldehyde reductase member 2 |Homo sapiens;>Q8NHP1|ARK74_HUMAN Aflatoxin B1 aldehyde reductase member 4 |Homo sapiens	0.0969767
>Q6I9Y2|THOC7_HUMAN THO complex subunit 7 homolog |Homo sapiens	0.0953524
>Q9ULV4|COR1C_HUMAN Coronin-1C |Homo sapiens	0.0934314
>O43290|SNUT1_HUMAN U4/U6.U5 tri-snRNP-associated protein 1 |Homo sapiens	0.0928364
>Q9HC35|EMAL4_HUMAN Echinoderm microtubule-associated protein-like 4 |Homo sapiens	0.0915796
>Q8WUM4|PDC6I_HUMAN Programmed cell death 6-interacting protein |Homo sapiens	0.0914285
>Q13283|G3BP1_HUMAN Ras GTPase-activating protein-binding protein 1 |Homo sapiens	0.0905466
>Q2M1P5|KIF7_HUMAN Kinesin-like protein KIF7 |Homo sapiens	0.0902453
>Q99497|PARK7_HUMAN Protein DJ-1 |Homo sapiens	0.090214
>Q15233|NONO_HUMAN Non-POU domain-containing octamer-binding protein |Homo sapiens	0.0874917
>P04179|SODM_HUMAN Superoxide dismutase [Mn], mitochondrial |Homo sapiens	0.0869346
>Q99729|ROAA_HUMAN Heterogeneous nuclear ribonucleoprotein A/B |Homo sapiens	0.0869106
>Q2TAY7|SMU1_HUMAN WD40 repeat-containing protein SMU1 |Homo sapiens	0.0861134
>Q01130|SRSF2_HUMAN Serine/arginine-rich splicing factor 2 |Homo sapiens;>Q9BRL6|SRSF8_HUMAN Serine/arginine-rich splicing factor 8 |Homo sapiens	0.0859216
>Q02790|FKBP4_HUMAN Peptidyl-prolyl cis-trans isomerase FKBP4 |Homo sapiens	0.0852529
>O95218|ZRAB2_HUMAN Zinc finger Ran-binding domain-containing protein 2 |Homo sapiens	0.0843062
>Q96I25|SPF45_HUMAN Splicing factor 45 |Homo sapiens	0.0833524
>Q9HAV4|XPO5_HUMAN Exportin-5 |Homo sapiens	0.0830652
>O75400|PR40A_HUMAN Pre-mRNA-processing factor 40 homolog A |Homo sapiens	0.0826002
>Q02241|KIF23_HUMAN Kinesin-like protein KIF23 |Homo sapiens	0.0793925
>Q9BXJ9|NAA15_HUMAN N-alpha-acetyltransferase 15, NatA auxiliary subunit |Homo sapiens	0.0791325
>P78417|GSTO1_HUMAN Glutathione S-transferase omega-1 |Homo sapiens	0.0789498
>Q9Y5X3|SNX5_HUMAN Sorting nexin-5 |Homo sapiens	0.0780931
>Q9UBB5|MBD2_HUMAN Methyl-CpG-binding domain protein 2 |Homo sapiens	0.0777264
>Q13263|TIF1B_HUMAN Transcription intermediary factor 1-beta |Homo sapiens	0.0776903
>Q9UKV8|AGO2_HUMAN Protein argonaute-2 |Homo sapiens;>Q9H9G7|AGO3_HUMAN Protein argonaute-3 |Homo sapiens;>Q9UL18|AGO1_HUMAN Protein argonaute-1 |Homo sapiens;>Q9HCK5|AGO4_HUMAN Protein argonaute-4 |Homo sapiens	0.075999
>Q13620|CUL4B_HUMAN Cullin-4B |Homo sapiens;>Q13619|CUL4A_HUMAN Cullin-4A |Homo sapiens	0.0749826
>P06748|NPM_HUMAN Nucleophosmin |Homo sapiens	0.0746304
>P22626|ROA2_HUMAN Heterogeneous nuclear ribonucleoproteins A2/B1 |Homo sapiens	0.0732147
>O75348|VATG1_HUMAN V-type proton ATPase subunit G 1 |Homo sapiens;>O95670|VATG2_HUMAN V-type proton ATPase subunit G 2 |Homo sapiens	0.0730833
>Q9NYB0|TE2IP_HUMAN Telomeric repeat-binding factor 2-interacting protein 1 |Homo sapiens	0.0728087
>P09429|HMGB1_HUMAN High mobility group protein B1 |Homo sapiens;>B2RPK0|HGB1A_HUMAN Putative high mobility group protein B1-like 1 |Homo sapiens	0.0723496
>P38646|GRP75_HUMAN Stress-70 protein, mitochondrial |Homo sapiens	0.0722778
>P45974|UBP5_HUMAN Ubiquitin carboxyl-terminal hydrolase 5 |Homo sapiens	0.0721842
>Q9Y2G7|ZFP30_HUMAN Zinc finger protein 30 homolog |Homo sapiens	0.0719796
>Q3MHD2|LSM12_HUMAN Protein LSM12 homolog |Homo sapiens	0.0706085
>P09874|PARP1_HUMAN Poly [ADP-ribose] polymerase 1 |Homo sapiens	0.0700133
>P36551|HEM6_HUMAN Coproporphyrinogen-III oxidase, mitochondrial |Homo sapiens	0.0686832
>P18615|NELFE_HUMAN Negative elongation factor E |Homo sapiens	0.0683465
>O60701|UGDH_HUMAN UDP-glucose 6-dehydrogenase |Homo sapiens	0.0679775
>P08670|VIME_HUMAN Vimentin |Homo sapiens;>Q9H552 TREMBL:Q9H552 Tax_Id=9606 Gene_Symbol=- Keratin-8-like protein 1;>Q7RTT2 TREMBL:Q7RTT2 Tax_Id=9606 Gene_Symbol=KRT78 Keratin-78;>Q8N1N4-2 SWISS-PROT:Q8N1N4-2 Tax_Id=9606 Gene_Symbol=KRT78 Isoform 2 of Kerat	0.0668514
>Q9BZK7|TBL1R_HUMAN F-box-like/WD repeat-containing protein TBL1XR1 |Homo sapiens	0.0662523
>P06744|G6PI_HUMAN Glucose-6-phosphate isomerase |Homo sapiens;>Q3ZBD7 SWISS-PROT:Q3ZBD7 (Bos taurus) Glucose-6-phosphate isomerase	0.0636877
>O43390|HNRPR_HUMAN Heterogeneous nuclear ribonucleoprotein R |Homo sapiens;>O60506|HNRPQ_HUMAN Heterogeneous nuclear ribonucleoprotein Q |Homo sapiens	0.0625618
>P49756|RBM25_HUMAN RNA-binding protein 25 |Homo sapiens	0.0619889
>Q13501|SQSTM_HUMAN Sequestosome-1 |Homo sapiens	0.0596799
>P08621|RU17_HUMAN U1 small nuclear ribonucleoprotein 70 kDa |Homo sapiens	0.0592857
>Q01804|OTUD4_HUMAN OTU domain-containing protein 4 |Homo sapiens	0.0585028
>O43815|STRN_HUMAN Striatin |Homo sapiens	0.0577331
>P61966|AP1S1_HUMAN AP-1 complex subunit sigma-1A |Homo sapiens	0.0567841
>Q7Z406|MYH14_HUMAN Myosin-14 |Homo sapiens	0.0564521
>P49790|NU153_HUMAN Nuclear pore complex protein Nup153 |Homo sapiens	0.0559477
>Q8TD16|BICD2_HUMAN Protein bicaudal D homolog 2 |Homo sapiens	0.0556783
>Q9H944|MED20_HUMAN Mediator of RNA polymerase II transcription subunit 20 |Homo sapiens	0.0539181
>P09661|RU2A_HUMAN U2 small nuclear ribonucleoprotein A |Homo sapiens	0.0536039
>O95983|MBD3_HUMAN Methyl-CpG-binding domain protein 3 |Homo sapiens;>Q9UBB5|MBD2_HUMAN Methyl-CpG-binding domain protein 2 |Homo sapiens	0.0535465
>P19174|PLCG1_HUMAN 1-phosphatidylinositol-4,5-bisphosphate phosphodiesterase gamma-1 |Homo sapiens	0.0532478
>Q9P2D1|CHD7_HUMAN Chromodomain-helicase-DNA-binding protein 7 |Homo sapiens;>Q3L8U1|CHD9_HUMAN Chromodomain-helicase-DNA-binding protein 9 |Homo sapiens;>Q8TD26|CHD6_HUMAN Chromodomain-helicase-DNA-binding protein 6 |Homo sapiens;>Q9HCK8|CHD8_HUMAN Chromo	0.052372
>Q9Y3B4|PM14_HUMAN Pre-mRNA branch site protein p14 |Homo sapiens	0.0515651
>Q13901|C1D_HUMAN Nuclear nucleic acid-binding protein C1D |Homo sapiens	0.0505214
>O95757|HS74L_HUMAN Heat shock 70 kDa protein 4L |Homo sapiens	0.0497198
>P12277|KCRB_HUMAN Creatine kinase B-type |Homo sapiens;>P06732|KCRM_HUMAN Creatine kinase M-type |Homo sapiens	0.0494478
>O95639|CPSF4_HUMAN Cleavage and polyadenylation specificity factor subunit 4 |Homo sapiens;>A6NMK7|CPS4L_HUMAN Putative cleavage and polyadenylation specificity factor subunit 4-like protein |Homo sapiens	0.0493319
>P61604|CH10_HUMAN 10 kDa heat shock protein, mitochondrial |Homo sapiens	0.0484763
>Q96EE3|SEH1_HUMAN Nucleoporin SEH1 |Homo sapiens	0.0484526
>P18206|VINC_HUMAN Vinculin |Homo sapiens	0.0462547
>O95639|CPSF4_HUMAN Cleavage and polyadenylation specificity factor subunit 4 |Homo sapiens	0.0445662
>P35249|RFC4_HUMAN Replication factor C subunit 4 |Homo sapiens	0.0443829
>P60174|TPIS_HUMAN Triosephosphate isomerase |Homo sapiens	0.0421029
>P22087|FBRL_HUMAN rRNA 2-O-methyltransferase fibrillarin |Homo sapiens;>A6NHQ2|FBLL1_HUMAN rRNA/tRNA 2-O-methyltransferase fibrillarin-like protein 1 |Homo sapiens	0.0420008
>Q92793|CBP_HUMAN CREB-binding protein |Homo sapiens	0.0389062
>O75347|TBCA_HUMAN Tubulin-specific chaperone A |Homo sapiens	0.0376837
>P11940|PABP1_HUMAN Polyadenylate-binding protein 1 |Homo sapiens;>Q9H361|PABP3_HUMAN Polyadenylate-binding protein 3 |Homo sapiens;>Q13310|PABP4_HUMAN Polyadenylate-binding protein 4 |Homo sapiens	0.0362956
>Q92734|TFG_HUMAN Protein TFG |Homo sapiens	0.0356962
>O43719|HTSF1_HUMAN HIV Tat-specific factor 1 |Homo sapiens	0.0351251
>P17844|DDX5_HUMAN Probable ATP-dependent RNA helicase DDX5 |Homo sapiens;>O00571|DDX3X_HUMAN ATP-dependent RNA helicase DDX3X |Homo sapiens;>O15523|DDX3Y_HUMAN ATP-dependent RNA helicase DDX3Y |Homo sapiens;>Q92841|DDX17_HUMAN Probable ATP-dependent RNA h	0.0343189
>Q8WYA0|IFT81_HUMAN Intraflagellar transport protein 81 homolog |Homo sapiens	0.0343188
>Q7Z4L5|TT21B_HUMAN Tetratricopeptide repeat protein 21B |Homo sapiens	0.0343188
>Q92784|DPF3_HUMAN Zinc finger protein DPF3 |Homo sapiens	0.0343188
>Q9UPN3|MACF1_HUMAN Microtubule-actin cross-linking factor 1, isoforms 1/2/3/5 |Homo sapiens;>Q03001|DYST_HUMAN Dystonin |Homo sapiens	0.0343188
>P49903|SPS1_HUMAN Selenide, water dikinase 1 |Homo sapiens	0.0340034
>Q9UNH7|SNX6_HUMAN Sorting nexin-6 |Homo sapiens	0.0337997
>P21359|NF1_HUMAN Neurofibromin |Homo sapiens	0.0328596
>Q9NRL3|STRN4_HUMAN Striatin-4 |Homo sapiens;>O43815|STRN_HUMAN Striatin |Homo sapiens;>Q13033|STRN3_HUMAN Striatin-3 |Homo sapiens	0.0325526
>Q15084|PDIA6_HUMAN Protein disulfide-isomerase A6 |Homo sapiens	0.0309445
>O00193|SMAP_HUMAN Small acidic protein |Homo sapiens	0.0292558
>Q13547|HDAC1_HUMAN Histone deacetylase 1 |Homo sapiens	0.0264098
>Q9Y383|LC7L2_HUMAN Putative RNA-binding protein Luc7-like 2 |Homo sapiens	0.0264019
>Q32MZ4|LRRF1_HUMAN Leucine-rich repeat flightless-interacting protein 1 |Homo sapiens	0.0263891
>Q0IIK2 TREMBL:Q0IIK2 (Bos taurus) Transferrin;>Q29443 SWISS-PROT:Q29443 Serotransferrin - Bos taurus (Bovine).	0.0262498
>Q7Z4H7|HAUS6_HUMAN HAUS augmin-like complex subunit 6 |Homo sapiens	0.0258239
>P06280|AGAL_HUMAN Alpha-galactosidase A |Homo sapiens	0.0233483
>P58876|H2B1D_HUMAN Histone H2B type 1-D |Homo sapiens;>P62807|H2B1C_HUMAN Histone H2B type 1-C/E/F/G/I |Homo sapiens;>Q5QNW6|H2B2F_HUMAN Histone H2B type 2-F |Homo sapiens;>Q93079|H2B1H_HUMAN Histone H2B type 1-H |Homo sapiens;>Q99877|H2B1N_HUMAN Histone	0.0229812
>Q9NZJ5|E2AK3_HUMAN Eukaryotic translation initiation factor 2-alpha kinase 3 |Homo sapiens	0.0228976
>O75446|SAP30_HUMAN Histone deacetylase complex subunit SAP30 |Homo sapiens	0.0228841
>O43399|TPD54_HUMAN Tumor protein D54 |Homo sapiens	0.0224558
>P26368|U2AF2_HUMAN Splicing factor U2AF 65 kDa subunit |Homo sapiens	0.0222965
>P84103|SRSF3_HUMAN Serine/arginine-rich splicing factor 3 |Homo sapiens	0.0217728
>Q16630|CPSF6_HUMAN Cleavage and polyadenylation specificity factor subunit 6 |Homo sapiens	0.0213737
>Q13112|CAF1B_HUMAN Chromatin assembly factor 1 subunit B |Homo sapiens	0.0208632
>Q9BTC8|MTA3_HUMAN Metastasis-associated protein MTA3 |Homo sapiens;>Q13330|MTA1_HUMAN Metastasis-associated protein MTA1 |Homo sapiens	0.0196126
>P20585|MSH3_HUMAN DNA mismatch repair protein Msh3 |Homo sapiens	0.0184909
>Q9NX24|NHP2_HUMAN H/ACA ribonucleoprotein complex subunit 2 |Homo sapiens	0.018038
>Q9UBL3|ASH2L_HUMAN Set1/Ash2 histone methyltransferase complex subunit ASH2 |Homo sapiens	0.0163934
>P19623|SPEE_HUMAN Spermidine synthase |Homo sapiens	0.0117287
>P04406|G3P_HUMAN Glyceraldehyde-3-phosphate dehydrogenase |Homo sapiens;>O60733|PA2G6_HUMAN 85 kDa calcium-independent phospholipase A2 |Homo sapiens	0.0116711
>O95229|ZWINT_HUMAN ZW10 interactor |Homo sapiens	0.00842766
>Q96GX9|MTNB_HUMAN Probable methylthioribulose-1-phosphate dehydratase |Homo sapiens	0.00624565
>Q9H773|DCTP1_HUMAN dCTP pyrophosphatase 1 |Homo sapiens	0.00370542
>Q9BVC4|LST8_HUMAN Target of rapamycin complex subunit LST8 |Homo sapiens	0.00161877
>P31937|3HIDH_HUMAN 3-hydroxyisobutyrate dehydrogenase, mitochondrial |Homo sapiens	0.000693317
>Q04726|TLE3_HUMAN Transducin-like enhancer protein 3 |Homo sapiens;>Q04727|TLE4_HUMAN Transducin-like enhancer protein 4 |Homo sapiens;>Q04724|TLE1_HUMAN Transducin-like enhancer protein 1 |Homo sapiens;>Q04725|TLE2_HUMAN Transducin-like enhancer protein	0.000649442
>Q16851|UGPA_HUMAN UTP--glucose-1-phosphate uridylyltransferase |Homo sapiens	0.000396608
>A6NKT7|RGPD3_HUMAN RanBP2-like and GRIP domain-containing protein 3 |Homo sapiens	-0.000531663
>Q8NFH3|NUP43_HUMAN Nucleoporin Nup43 |Homo sapiens	-0.00209527
>A8MWD9|RUXGL_HUMAN Small nuclear ribonucleoprotein G-like protein |Homo sapiens;>P62308|RUXG_HUMAN Small nuclear ribonucleoprotein G |Homo sapiens	-0.00227677
>Q9NYF0|DACT1_HUMAN Dapper homolog 1 |Homo sapiens	-0.00239661
>O15355|PPM1G_HUMAN Protein phosphatase 1G |Homo sapiens	-0.0038893
>Q9BRT9|SLD5_HUMAN DNA replication complex GINS protein SLD5 |Homo sapiens	-0.0044395
>Q92572|AP3S1_HUMAN AP-3 complex subunit sigma-1 |Homo sapiens	-0.00511658
>P51991|ROA3_HUMAN Heterogeneous nuclear ribonucleoprotein A3 |Homo sapiens	-0.00588121
>O95602|RPA1_HUMAN DNA-directed RNA polymerase I subunit RPA1 |Homo sapiens;>O14802|RPC1_HUMAN DNA-directed RNA polymerase III subunit RPC1 |Homo sapiens	-0.00718332
>Q9NRX4|PHP14_HUMAN 14 kDa phosphohistidine phosphatase |Homo sapiens	-0.00761775
>P63104|1433Z_HUMAN 14-3-3 protein zeta/delta |Homo sapiens;>P61981|1433G_HUMAN 14-3-3 protein gamma |Homo sapiens;>Q04917|1433F_HUMAN 14-3-3 protein eta |Homo sapiens	-0.0092036
>P09972|ALDOC_HUMAN Fructose-bisphosphate aldolase C |Homo sapiens	-0.00969628
>Q86YP4|P66A_HUMAN Transcriptional repressor p66-alpha |Homo sapiens	-0.00982456
>P29401|TKT_HUMAN Transketolase |Homo sapiens;>P51854|TKTL1_HUMAN Transketolase-like protein 1 |Homo sapiens	-0.0108455
>Q99614|TTC1_HUMAN Tetratricopeptide repeat protein 1 |Homo sapiens	-0.0110837
>P63165|SUMO1_HUMAN Small ubiquitin-related modifier 1 |Homo sapiens	-0.0114047
>Q13428|TCOF_HUMAN Treacle protein |Homo sapiens	-0.0140531
>O43390|HNRPR_HUMAN Heterogeneous nuclear ribonucleoprotein R |Homo sapiens	-0.014561
>Q9P258|RCC2_HUMAN Protein RCC2 |Homo sapiens	-0.0182316
>P27348|1433T_HUMAN 14-3-3 protein theta |Homo sapiens	-0.0187221
>O43447|PPIH_HUMAN Peptidyl-prolyl cis-trans isomerase H |Homo sapiens	-0.0201081
>P61956|SUMO2_HUMAN Small ubiquitin-related modifier 2 |Homo sapiens;>P55854|SUMO3_HUMAN Small ubiquitin-related modifier 3 |Homo sapiens;>Q6EEV6|SUMO4_HUMAN Small ubiquitin-related modifier 4 |Homo sapiens	-0.0222307
>Q3ZCM7|TBB8_HUMAN Tubulin beta-8 chain |Homo sapiens;>A6NNZ2|TBB8B_HUMAN Tubulin beta-8 chain B |Homo sapiens;>P07437|TBB5_HUMAN Tubulin beta chain |Homo sapiens;>P68371|TBB4B_HUMAN Tubulin beta-4B chain |Homo sapiens;>Q9BVA1|TBB2B_HUMAN Tubulin beta-2B c	-0.023228
>P12532|KCRU_HUMAN Creatine kinase U-type, mitochondrial |Homo sapiens;>P17540|KCRS_HUMAN Creatine kinase S-type, mitochondrial |Homo sapiens	-0.0235745
>Q6UN15|FIP1_HUMAN Pre-mRNA 3-end-processing factor FIP1 |Homo sapiens	-0.0241221
>O95239|KIF4A_HUMAN Chromosome-associated kinesin KIF4A |Homo sapiens	-0.0242019
>Q14161|GIT2_HUMAN ARF GTPase-activating protein GIT2 |Homo sapiens	-0.0242317
>P06733|ENOA_HUMAN Alpha-enolase |Homo sapiens	-0.0246435
>O95456|PSMG1_HUMAN Proteasome assembly chaperone 1 |Homo sapiens	-0.0281897
>P49005|DPOD2_HUMAN DNA polymerase delta subunit 2 |Homo sapiens	-0.0312739
>Q9P2D1|CHD7_HUMAN Chromodomain-helicase-DNA-binding protein 7 |Homo sapiens	-0.0317383
>O95983|MBD3_HUMAN Methyl-CpG-binding domain protein 3 |Homo sapiens	-0.0341753
>P10253|LYAG_HUMAN Lysosomal alpha-glucosidase |Homo sapiens	-0.0344632
>O43172|PRP4_HUMAN U4/U6 small nuclear ribonucleoprotein Prp4 |Homo sapiens	-0.0348269
>Q9Y383|LC7L2_HUMAN Putative RNA-binding protein Luc7-like 2 |Homo sapiens;>Q9NQ29|LUC7L_HUMAN Putative RNA-binding protein Luc7-like 1 |Homo sapiens	-0.0383452
>P58546|MTPN_HUMAN Myotrophin |Homo sapiens	-0.0398274
>O15446|RPA34_HUMAN DNA-directed RNA polymerase I subunit RPA34 |Homo sapiens	-0.0400118
>P51531|SMCA2_HUMAN Probable global transcription activator SNF2L2 |Homo sapiens	-0.0415062
>Q16576|RBBP7_HUMAN Histone-binding protein RBBP7 |Homo sapiens;>Q09028|RBBP4_HUMAN Histone-binding protein RBBP4 |Homo sapiens	-0.0420189
>O94776|MTA2_HUMAN Metastasis-associated protein MTA2 |Homo sapiens;>Q13330|MTA1_HUMAN Metastasis-associated protein MTA1 |Homo sapiens	-0.0420427
>Q9Y5P6|GMPPB_HUMAN Mannose-1-phosphate guanyltransferase beta |Homo sapiens	-0.0421479
>P17480|UBF1_HUMAN Nucleolar transcription factor 1 |Homo sapiens	-0.0423527
>Q9Y6G9|DC1L1_HUMAN Cytoplasmic dynein 1 light intermediate chain 1 |Homo sapiens;>O43237|DC1L2_HUMAN Cytoplasmic dynein 1 light intermediate chain 2 |Homo sapiens	-0.0432535
>Q9ULH1|ASAP1_HUMAN Arf-GAP with SH3 domain, ANK repeat and PH domain-containing protein 1 |Homo sapiens	-0.045058
>A6ND91|ASPD_HUMAN Putative L-aspartate dehydrogenase |Homo sapiens	-0.045058
>P16152|CBR1_HUMAN Carbonyl reductase [NADPH] 1 |Homo sapiens	-0.045058
>Q9NXG2|THUM1_HUMAN THUMP domain-containing protein 1 |Homo sapiens	-0.045058
>Q9H9C1|VIPAR_HUMAN VPS33B-interacting protein |Homo sapiens	-0.045058
>P13797|PLST_HUMAN Plastin-3 |Homo sapiens;>Q14651|PLSI_HUMAN Plastin-1 |Homo sapiens	-0.045058
>Q9NXG0|CNTLN_HUMAN Centlein |Homo sapiens	-0.045058
>Q9H6R0|DHX33_HUMAN Putative ATP-dependent RNA helicase DHX33 |Homo sapiens	-0.045058
>Q13573|SNW1_HUMAN SNW domain-containing protein 1 |Homo sapiens	-0.0454963
>Q9H0B6|KLC2_HUMAN Kinesin light chain 2 |Homo sapiens	-0.0462877
>Q9NYR9|KBRS2_HUMAN NF-kappa-B inhibitor-interacting Ras-like protein 2 |Homo sapiens	-0.0469816
>Q9H1I8|ASCC2_HUMAN Activating signal cointegrator 1 complex subunit 2 |Homo sapiens	-0.0487995
>Q9NRF9|DPOE3_HUMAN DNA polymerase epsilon subunit 3 |Homo sapiens	-0.049586
>P06733|ENOA_HUMAN Alpha-enolase |Homo sapiens;>P09104|ENOG_HUMAN Gamma-enolase |Homo sapiens;>P13929|ENOB_HUMAN Beta-enolase |Homo sapiens	-0.0496571
>Q9NWB7|IFT57_HUMAN Intraflagellar transport protein 57 homolog |Homo sapiens	-0.0507259
>P00374|DYR_HUMAN Dihydrofolate reductase |Homo sapiens	-0.0532604
>Q08945|SSRP1_HUMAN FACT complex subunit SSRP1 |Homo sapiens	-0.0560537
>P0C0S5|H2AZ_HUMAN Histone H2A.Z |Homo sapiens;>Q71UI9|H2AV_HUMAN Histone H2A.V |Homo sapiens;>P16104|H2AX_HUMAN Histone H2A.x |Homo sapiens;>Q96QV6|H2A1A_HUMAN Histone H2A type 1-A |Homo sapiens;>Q8IUE6|H2A2B_HUMAN Histone H2A type 2-B |Homo sapiens;>P0C0	-0.0565369
>P63151|2ABA_HUMAN Serine/threonine-protein phosphatase 2A 55 kDa regulatory subunit B alpha isoform |Homo sapiens;>Q66LE6|2ABD_HUMAN Serine/threonine-protein phosphatase 2A 55 kDa regulatory subunit B delta isoform |Homo sapiens;>Q00005|2ABB_HUMAN Serine/	-0.0576919
>Q8NFW8|NEUA_HUMAN N-acylneuraminate cytidylyltransferase |Homo sapiens	-0.0579214
>Q96J01|THOC3_HUMAN THO complex subunit 3 |Homo sapiens	-0.0584411
>Q92945|FUBP2_HUMAN Far upstream element-binding protein 2 |Homo sapiens;>Q96AE4|FUBP1_HUMAN Far upstream element-binding protein 1 |Homo sapiens	-0.0584664
>P11142|HSP7C_HUMAN Heat shock cognate 71 kDa protein |Homo sapiens;>P54652|HSP72_HUMAN Heat shock-related 70 kDa protein 2 |Homo sapiens;>P38646|GRP75_HUMAN Stress-70 protein, mitochondrial |Homo sapiens	-0.0592161
>O43164|PJA2_HUMAN E3 ubiquitin-protein ligase Praja-2 |Homo sapiens	-0.0600568
>Q4LE39|ARI4B_HUMAN AT-rich interactive domain-containing protein 4B |Homo sapiens	-0.0626696
>P13674|P4HA1_HUMAN Prolyl 4-hydroxylase subunit alpha-1 |Homo sapiens	-0.0643025
>P15927|RFA2_HUMAN Replication protein A 32 kDa subunit |Homo sapiens	-0.0653175
>Q86YJ6|THNS2_HUMAN Threonine synthase-like 2 |Homo sapiens	-0.0658982
>P35659|DEK_HUMAN Protein DEK |Homo sapiens	-0.0659295
>Q0IIK2 TREMBL:Q0IIK2 (Bos taurus) Transferrin;>Q29443 SWISS-PROT:Q29443 Serotransferrin - Bos taurus (Bovine).;>Q2HJF0 TREMBL:Q2HJF0 (Bos taurus) Similar to Serotransferrin	-0.0679433
>Q9H7N4|SFR19_HUMAN Splicing factor, arginine/serine-rich 19 |Homo sapiens	-0.070715
>O95347|SMC2_HUMAN Structural maintenance of chromosomes protein 2 |Homo sapiens	-0.0719013
>O95163|ELP1_HUMAN Elongator complex protein 1 |Homo sapiens	-0.0728378
>Q96T49|PP16B_HUMAN Protein phosphatase 1 regulatory inhibitor subunit 16B |Homo sapiens	-0.0728503
>P06576|ATPB_HUMAN ATP synthase subunit beta, mitochondrial |Homo sapiens	-0.0756676
>Q8NC51|PAIRB_HUMAN Plasminogen activator inhibitor 1 RNA-binding protein |Homo sapiens	-0.0756684
>P40939|ECHA_HUMAN Trifunctional enzyme subunit alpha, mitochondrial |Homo sapiens	-0.0790225
>P31943|HNRH1_HUMAN Heterogeneous nuclear ribonucleoprotein H |Homo sapiens	-0.0794977
>Q9H7L9|SDS3_HUMAN Sin3 histone deacetylase corepressor complex component SDS3 |Homo sapiens	-0.0796315
>Q8NCA5|FA98A_HUMAN Protein FAM98A |Homo sapiens;>Q52LJ0|FA98B_HUMAN Protein FAM98B |Homo sapiens	-0.0802595
>O60232|SSA27_HUMAN Sjoegren syndrome/scleroderma autoantigen 1 |Homo sapiens	-0.0811855
>P20839|IMDH1_HUMAN Inosine-5-monophosphate dehydrogenase 1 |Homo sapiens	-0.0886348
>O00154|BACH_HUMAN Cytosolic acyl coenzyme A thioester hydrolase |Homo sapiens	-0.0894045
>Q9ULJ1|ODF2L_HUMAN Outer dense fiber protein 2-like |Homo sapiens	-0.0905772
>Q8WZ42|TITIN_HUMAN Titin |Homo sapiens	-0.0907036
>Q15459|SF3A1_HUMAN Splicing factor 3A subunit 1 |Homo sapiens	-0.096104
>P63104|1433Z_HUMAN 14-3-3 protein zeta/delta |Homo sapiens	-0.0966785
>Q86X10|RLGPB_HUMAN Ral GTPase-activating protein subunit beta |Homo sapiens	-0.096957
>P60712 SWISS-PROT:P60712 (Bos taurus) Actin, cytoplasmic 1;>P60709|ACTB_HUMAN Actin, cytoplasmic 1 |Homo sapiens;>P63261|ACTG_HUMAN Actin, cytoplasmic 2 |Homo sapiens;>P68032|ACTC_HUMAN Actin, alpha cardiac muscle 1 |Homo sapiens;>P68133|ACTS_HUMAN Actin,	-0.0983316
>P63151|2ABA_HUMAN Serine/threonine-protein phosphatase 2A 55 kDa regulatory subunit B alpha isoform |Homo sapiens;>Q9Y2T4|2ABG_HUMAN Serine/threonine-protein phosphatase 2A 55 kDa regulatory subunit B gamma isoform |Homo sapiens	-0.0985746
>P47914|RL29_HUMAN 60S ribosomal protein L29 |Homo sapiens	-0.099239
>Q15149|PLEC_HUMAN Plectin |Homo sapiens	-0.0994435
>Q04917|1433F_HUMAN 14-3-3 protein eta |Homo sapiens	-0.099986
>Q15773|MLF2_HUMAN Myeloid leukemia factor 2 |Homo sapiens	-0.100726
>P62312|LSM6_HUMAN U6 snRNA-associated Sm-like protein LSm6 |Homo sapiens	-0.100915
>Q14964|RB39A_HUMAN Ras-related protein Rab-39A |Homo sapiens;>P20340|RAB6A_HUMAN Ras-related protein Rab-6A |Homo sapiens;>Q9NRW1|RAB6B_HUMAN Ras-related protein Rab-6B |Homo sapiens	-0.10157
>P36873|PP1G_HUMAN Serine/threonine-protein phosphatase PP1-gamma catalytic subunit |Homo sapiens;>P62140|PP1B_HUMAN Serine/threonine-protein phosphatase PP1-beta catalytic subunit |Homo sapiens	-0.103691
>P09211|GSTP1_HUMAN Glutathione S-transferase P |Homo sapiens	-0.104025
>P63241|IF5A1_HUMAN Eukaryotic translation initiation factor 5A-1 |Homo sapiens;>Q9GZV4|IF5A2_HUMAN Eukaryotic translation initiation factor 5A-2 |Homo sapiens	-0.104811
>Q9Y2B0|CNPY2_HUMAN Protein canopy homolog 2 |Homo sapiens	-0.108277
>P34949|MPI_HUMAN Mannose-6-phosphate isomerase |Homo sapiens	-0.109693
>Q13838|DX39B_HUMAN Spliceosome RNA helicase DDX39B |Homo sapiens;>O00148|DX39A_HUMAN ATP-dependent RNA helicase DDX39A |Homo sapiens	-0.109932
>P11137|MAP2_HUMAN Microtubule-associated protein 2 |Homo sapiens	-0.110157
>P62314|SMD1_HUMAN Small nuclear ribonucleoprotein Sm D1 |Homo sapiens	-0.112296
>Q9UK53|ING1_HUMAN Inhibitor of growth protein 1 |Homo sapiens	-0.112637
>P60712 SWISS-PROT:P60712 (Bos taurus) Actin, cytoplasmic 1;>P60709|ACTB_HUMAN Actin, cytoplasmic 1 |Homo sapiens;>Q6S8J3|POTEE_HUMAN POTE ankyrin domain family member E |Homo sapiens;>P63261|ACTG_HUMAN Actin, cytoplasmic 2 |Homo sapiens	-0.114052
>P27816|MAP4_HUMAN Microtubule-associated protein 4 |Homo sapiens	-0.11478
>P10599|THIO_HUMAN Thioredoxin |Homo sapiens	-0.115049
>Q9NQP4|PFD4_HUMAN Prefoldin subunit 4 |Homo sapiens	-0.116331
>P11142|HSP7C_HUMAN Heat shock cognate 71 kDa protein |Homo sapiens	-0.116454
>Q13185|CBX3_HUMAN Chromobox protein homolog 3 |Homo sapiens;>P83916|CBX1_HUMAN Chromobox protein homolog 1 |Homo sapiens	-0.11698
>Q9UHI6|DDX20_HUMAN Probable ATP-dependent RNA helicase DDX20 |Homo sapiens	-0.117213
>P09417|DHPR_HUMAN Dihydropteridine reductase |Homo sapiens	-0.118397
>Q14683|SMC1A_HUMAN Structural maintenance of chromosomes protein 1A |Homo sapiens;>Q8NDV3|SMC1B_HUMAN Structural maintenance of chromosomes protein 1B |Homo sapiens	-0.118947
>Q14157|UBP2L_HUMAN Ubiquitin-associated protein 2-like |Homo sapiens	-0.119812
>Q8IY82|CC135_HUMAN Coiled-coil domain-containing protein lobo homolog |Homo sapiens	-0.121107
>P58876|H2B1D_HUMAN Histone H2B type 1-D |Homo sapiens;>P62807|H2B1C_HUMAN Histone H2B type 1-C/E/F/G/I |Homo sapiens;>Q5QNW6|H2B2F_HUMAN Histone H2B type 2-F |Homo sapiens;>Q93079|H2B1H_HUMAN Histone H2B type 1-H |Homo sapiens;>Q99877|H2B1N_HUMAN Histone	-0.121883
>P55895|RAG2_HUMAN V(D)J recombination-activating protein 2 |Homo sapiens	-0.12258
>P16989|DBPA_HUMAN DNA-binding protein A |Homo sapiens	-0.123774
>P33316|DUT_HUMAN Deoxyuridine 5-triphosphate nucleotidohydrolase, mitochondrial |Homo sapiens	-0.125131
>Q6UXN9|WDR82_HUMAN WD repeat-containing protein 82 |Homo sapiens	-0.126342
>Q96PK6|RBM14_HUMAN RNA-binding protein 14 |Homo sapiens	-0.128892
>Q9UK45|LSM7_HUMAN U6 snRNA-associated Sm-like protein LSm7 |Homo sapiens	-0.129249
>Q13838|DX39B_HUMAN Spliceosome RNA helicase DDX39B |Homo sapiens	-0.129555
>P62875|RPAB5_HUMAN DNA-directed RNA polymerases I, II, and III subunit RPABC5 |Homo sapiens	-0.129734
>P61221|ABCE1_HUMAN ATP-binding cassette sub-family E member 1 |Homo sapiens	-0.130045
>P48634|PRC2A_HUMAN Protein PRRC2A |Homo sapiens	-0.13204
>Q9HC16|ABC3G_HUMAN DNA dC->dU-editing enzyme APOBEC-3G |Homo sapiens	-0.134329
>Q8IZ83|A16A1_HUMAN Aldehyde dehydrogenase family 16 member A1 |Homo sapiens	-0.13452
>Q14155|ARHG7_HUMAN Rho guanine nucleotide exchange factor 7 |Homo sapiens	-0.135745
>O60678|ANM3_HUMAN Protein arginine N-methyltransferase 3 |Homo sapiens	-0.135761
>Q9UPN3|MACF1_HUMAN Microtubule-actin cross-linking factor 1, isoforms 1/2/3/5 |Homo sapiens;>Q96PK2|MACF4_HUMAN Microtubule-actin cross-linking factor 1, isoform 4 |Homo sapiens	-0.13689
>P11142|HSP7C_HUMAN Heat shock cognate 71 kDa protein |Homo sapiens;>P54652|HSP72_HUMAN Heat shock-related 70 kDa protein 2 |Homo sapiens;>P08107|HSP71_HUMAN Heat shock 70 kDa protein 1A/1B |Homo sapiens;>P17066|HSP76_HUMAN Heat shock 70 kDa protein 6 |Hom	-0.139607
>P35241|RADI_HUMAN Radixin |Homo sapiens	-0.140143
>Q01813|K6PP_HUMAN 6-phosphofructokinase type C |Homo sapiens	-0.140164
>P35244|RFA3_HUMAN Replication protein A 14 kDa subunit |Homo sapiens	-0.140349
>Q07955|SRSF1_HUMAN Serine/arginine-rich splicing factor 1 |Homo sapiens	-0.141251
>Q8TDP1|RNH2C_HUMAN Ribonuclease H2 subunit C |Homo sapiens	-0.144503
>O94888|UBXN7_HUMAN UBX domain-containing protein 7 |Homo sapiens	-0.144847
>O43765|SGTA_HUMAN Small glutamine-rich tetratricopeptide repeat-containing protein alpha |Homo sapiens	-0.147357
>Q3ZCM7|TBB8_HUMAN Tubulin beta-8 chain |Homo sapiens;>A6NNZ2|TBB8B_HUMAN Tubulin beta-8 chain B |Homo sapiens;>A6NKZ8|YI016_HUMAN Putative tubulin beta chain-like protein ENSP00000290377 |Homo sapiens;>Q9H4B7|TBB1_HUMAN Tubulin beta-1 chain |Homo sapiens;	-0.147718
>Q6Y7W6|PERQ2_HUMAN PERQ amino acid-rich with GYF domain-containing protein 2 |Homo sapiens	-0.147958
>Q562R1|ACTBL_HUMAN Beta-actin-like protein 2 |Homo sapiens	-0.148077
>P34932|HSP74_HUMAN Heat shock 70 kDa protein 4 |Homo sapiens;>Q92598|HS105_HUMAN Heat shock protein 105 kDa |Homo sapiens	-0.148254
>P50502|F10A1_HUMAN Hsc70-interacting protein |Homo sapiens;>Q8IZP2|ST134_HUMAN Putative protein FAM10A4 |Homo sapiens	-0.149346
>Q9Y281|COF2_HUMAN Cofilin-2 |Homo sapiens	-0.150782
>P61978|HNRPK_HUMAN Heterogeneous nuclear ribonucleoprotein K |Homo sapiens	-0.151267
>P62310|LSM3_HUMAN U6 snRNA-associated Sm-like protein LSm3 |Homo sapiens	-0.151434
>O95248|MTMR5_HUMAN Myotubularin-related protein 5 |Homo sapiens	-0.151521
>P30041|PRDX6_HUMAN Peroxiredoxin-6 |Homo sapiens	-0.15238
>P52298|NCBP2_HUMAN Nuclear cap-binding protein subunit 2 |Homo sapiens	-0.153318
>Q9BZL3|NID67_HUMAN Putative small membrane protein NID67 |Homo sapiens	-0.154583
>Q9NP50|FA60A_HUMAN Protein FAM60A |Homo sapiens	-0.15545
>P04350|TBB4A_HUMAN Tubulin beta-4A chain |Homo sapiens	-0.155893
>Q9Y5V3|MAGD1_HUMAN Melanoma-associated antigen D1 |Homo sapiens	-0.156144
>Q07021|C1QBP_HUMAN Complement component 1 Q subcomponent-binding protein, mitochondrial |Homo sapiens	-0.156714
>P09429|HMGB1_HUMAN High mobility group protein B1 |Homo sapiens;>B2RPK0|HGB1A_HUMAN Putative high mobility group protein B1-like 1 |Homo sapiens;>P26583|HMGB2_HUMAN High mobility group protein B2 |Homo sapiens	-0.156773
>Q8WXI9|P66B_HUMAN Transcriptional repressor p66-beta |Homo sapiens	-0.157412
>Q9UFF9|CNOT8_HUMAN CCR4-NOT transcription complex subunit 8 |Homo sapiens	-0.158345
>Q7Z3B4|NUP54_HUMAN Nucleoporin p54 |Homo sapiens	-0.159291
>P60712 SWISS-PROT:P60712 (Bos taurus) Actin, cytoplasmic 1;>P60709|ACTB_HUMAN Actin, cytoplasmic 1 |Homo sapiens;>P63261|ACTG_HUMAN Actin, cytoplasmic 2 |Homo sapiens;>P68032|ACTC_HUMAN Actin, alpha cardiac muscle 1 |Homo sapiens;>P68133|ACTS_HUMAN Actin,	-0.159538
>Q15293|RCN1_HUMAN Reticulocalbin-1 |Homo sapiens	-0.159755
>Q9NRN7|ADPPT_HUMAN L-aminoadipate-semialdehyde dehydrogenase-phosphopantetheinyl transferase |Homo sapiens	-0.163305
>Q9Y315|DEOC_HUMAN Putative deoxyribose-phosphate aldolase |Homo sapiens	-0.163797
>Q5PSV4|BRM1L_HUMAN Breast cancer metastasis-suppressor 1-like protein |Homo sapiens	-0.164349
>Q9Y2X7|GIT1_HUMAN ARF GTPase-activating protein GIT1 |Homo sapiens	-0.164523
>Q8NBT2|SPC24_HUMAN Kinetochore protein Spc24 |Homo sapiens	-0.165351
>Q9ULU4|PKCB1_HUMAN Protein kinase C-binding protein 1 |Homo sapiens	-0.16696
>Q8N8S7|ENAH_HUMAN Protein enabled homolog |Homo sapiens	-0.167936
>P21695|GPDA_HUMAN Glycerol-3-phosphate dehydrogenase [NAD+], cytoplasmic |Homo sapiens	-0.168151
>P55084|ECHB_HUMAN Trifunctional enzyme subunit beta, mitochondrial |Homo sapiens	-0.168251
>P54819|KAD2_HUMAN Adenylate kinase 2, mitochondrial |Homo sapiens	-0.168431
>P54105|ICLN_HUMAN Methylosome subunit pICln |Homo sapiens	-0.169286
>Q7Z3U7|MON2_HUMAN Protein MON2 homolog |Homo sapiens	-0.170172
>Q9H9Y6|RPA2_HUMAN DNA-directed RNA polymerase I subunit RPA2 |Homo sapiens	-0.171271
>P07737|PROF1_HUMAN Profilin-1 |Homo sapiens	-0.171941
>Q8IY31|IFT20_HUMAN Intraflagellar transport protein 20 homolog |Homo sapiens	-0.17267
>Q9BV68|RN126_HUMAN RING finger protein 126 |Homo sapiens	-0.172671
>O14530|TXND9_HUMAN Thioredoxin domain-containing protein 9 |Homo sapiens	-0.172921
>A6NL28|TPM3L_HUMAN Putative tropomyosin alpha-3 chain-like protein |Homo sapiens	-0.173607
>Q9Y4E1|FA21C_HUMAN WASH complex subunit FAM21C |Homo sapiens;>Q5SRD0|FA21D_HUMAN Putative WASH complex subunit FAM21 |Homo sapiens	-0.173763
>Q9P1U0|RPA12_HUMAN DNA-directed RNA polymerase I subunit RPA12 |Homo sapiens	-0.174677
>P61964|WDR5_HUMAN WD repeat-containing protein 5 |Homo sapiens;>Q86VZ2|WDR5B_HUMAN WD repeat-containing protein 5B |Homo sapiens	-0.174768
>Q9UDY4|DNJB4_HUMAN DnaJ homolog subfamily B member 4 |Homo sapiens	-0.175664
>Q05519|SRS11_HUMAN Serine/arginine-rich splicing factor 11 |Homo sapiens	-0.176695
>P02769 SWISS-PROT:P02769 (Bos taurus) Bovine serum albumin precursor	-0.177
>P13693|TCTP_HUMAN Translationally-controlled tumor protein |Homo sapiens;>Q56UQ5|TPT1L_HUMAN TPT1-like protein |Homo sapiens	-0.181433
>P02769 SWISS-PROT:P02769 (Bos taurus) Bovine serum albumin precursor;>P02768-1 SWISS-PROT:P02768-1 Tax_Id=9606 Gene_Symbol=ALB Isoform 1 of Serum albumin precursor;>P02768|ALBU_HUMAN Serum albumin |Homo sapiens	-0.18352
>P31946|1433B_HUMAN 14-3-3 protein beta/alpha |Homo sapiens;>P27348|1433T_HUMAN 14-3-3 protein theta |Homo sapiens;>P63104|1433Z_HUMAN 14-3-3 protein zeta/delta |Homo sapiens	-0.183607
>Q9Y265|RUVB1_HUMAN RuvB-like 1 |Homo sapiens	-0.184296
>O75534|CSDE1_HUMAN Cold shock domain-containing protein E1 |Homo sapiens	-0.184435
>Q70CQ1|UBP49_HUMAN Ubiquitin carboxyl-terminal hydrolase 49 |Homo sapiens	-0.186719
>Q99496|RING2_HUMAN E3 ubiquitin-protein ligase RING2 |Homo sapiens	-0.190271
>O43707|ACTN4_HUMAN Alpha-actinin-4 |Homo sapiens;>Q08043|ACTN3_HUMAN Alpha-actinin-3 |Homo sapiens	-0.190397
>P11940|PABP1_HUMAN Polyadenylate-binding protein 1 |Homo sapiens;>Q96DU9|PABP5_HUMAN Polyadenylate-binding protein 5 |Homo sapiens	-0.193664
>P31946|1433B_HUMAN 14-3-3 protein beta/alpha |Homo sapiens;>P27348|1433T_HUMAN 14-3-3 protein theta |Homo sapiens;>P63104|1433Z_HUMAN 14-3-3 protein zeta/delta |Homo sapiens;>P61981|1433G_HUMAN 14-3-3 protein gamma |Homo sapiens;>Q04917|1433F_HUMAN 14-3-3	-0.194381
>Q9GZT3|SLIRP_HUMAN SRA stem-loop-interacting RNA-binding protein, mitochondrial |Homo sapiens	-0.194628
>Q6ZV73|FGD6_HUMAN FYVE, RhoGEF and PH domain-containing protein 6 |Homo sapiens	-0.195581
>P31946|1433B_HUMAN 14-3-3 protein beta/alpha |Homo sapiens	-0.196743
>P49792|RBP2_HUMAN E3 SUMO-protein ligase RanBP2 |Homo sapiens;>O14715|RGPD8_HUMAN RANBP2-like and GRIP domain-containing protein 8 |Homo sapiens;>Q99666|RGPD5_HUMAN RANBP2-like and GRIP domain-containing protein 5/6 |Homo sapiens;>A6NKT7|RGPD3_HUMAN RanBP	-0.200487
>Q16555|DPYL2_HUMAN Dihydropyrimidinase-related protein 2 |Homo sapiens;>Q14194|DPYL1_HUMAN Dihydropyrimidinase-related protein 1 |Homo sapiens	-0.201023
>Q14978|NOLC1_HUMAN Nucleolar and coiled-body phosphoprotein 1 |Homo sapiens	-0.202589
>O43663|PRC1_HUMAN Protein regulator of cytokinesis 1 |Homo sapiens	-0.208051
>P17844|DDX5_HUMAN Probable ATP-dependent RNA helicase DDX5 |Homo sapiens;>Q92841|DDX17_HUMAN Probable ATP-dependent RNA helicase DDX17 |Homo sapiens	-0.209389
>Q9UNM6|PSD13_HUMAN 26S proteasome non-ATPase regulatory subunit 13 |Homo sapiens	-0.211511
>O00571|DDX3X_HUMAN ATP-dependent RNA helicase DDX3X |Homo sapiens	-0.212279
>O60333|KIF1B_HUMAN Kinesin-like protein KIF1B |Homo sapiens;>Q12756|KIF1A_HUMAN Kinesin-like protein KIF1A |Homo sapiens;>O43896|KIF1C_HUMAN Kinesin-like protein KIF1C |Homo sapiens	-0.214388
>P02533 SWISS-PROT:P02533 Tax_Id=9606 Gene_Symbol=KRT14 Keratin, type I cytoskeletal 14;>P02533|K1C14_HUMAN Keratin, type I cytoskeletal 14 |Homo sapiens;>P08779 SWISS-PROT:P08779 Tax_Id=9606 Gene_Symbol=KRT16 Keratin, type I cytoskeletal 16;>P08779|K1C16_	-0.215298
>Q5VST9|OBSCN_HUMAN Obscurin |Homo sapiens	-0.215298
>Q86YV5|SG223_HUMAN Tyrosine-protein kinase SgK223 |Homo sapiens	-0.215298
>Q9NWB1|RFOX1_HUMAN RNA binding protein fox-1 homolog 1 |Homo sapiens;>O43251|RFOX2_HUMAN RNA binding protein fox-1 homolog 2 |Homo sapiens	-0.215298
>Q8IWJ2|GCC2_HUMAN GRIP and coiled-coil domain-containing protein 2 |Homo sapiens	-0.221133
>Q9H0E3|SP130_HUMAN Histone deacetylase complex subunit SAP130 |Homo sapiens	-0.221586
>P21127|CD11B_HUMAN Cyclin-dependent kinase 11B |Homo sapiens;>Q9UQ88|CD11A_HUMAN Cyclin-dependent kinase 11A |Homo sapiens	-0.222207
>Q9H160|ING2_HUMAN Inhibitor of growth protein 2 |Homo sapiens	-0.222226
>Q9UKV8|AGO2_HUMAN Protein argonaute-2 |Homo sapiens	-0.223482
>P07900|HS90A_HUMAN Heat shock protein HSP 90-alpha |Homo sapiens;>Q14568|HS902_HUMAN Putative heat shock protein HSP 90-alpha A2 |Homo sapiens;>P08238|HS90B_HUMAN Heat shock protein HSP 90-beta |Homo sapiens;>Q58FF7|H90B3_HUMAN Putative heat shock protein	-0.225243
>P21815|SIAL_HUMAN Bone sialoprotein 2 |Homo sapiens	-0.226663
>P52272|HNRPM_HUMAN Heterogeneous nuclear ribonucleoprotein M |Homo sapiens	-0.228561
>P51513|NOVA1_HUMAN RNA-binding protein Nova-1 |Homo sapiens	-0.228829
>Q9H4A3|WNK1_HUMAN Serine/threonine-protein kinase WNK1 |Homo sapiens	-0.228829
>Q9NX46|ARHL2_HUMAN Poly(ADP-ribose) glycohydrolase ARH3 |Homo sapiens	-0.228829
>Q6ZNG2|DBX2_HUMAN Homeobox protein DBX2 |Homo sapiens	-0.228829
>P04264|K2C1_HUMAN Keratin, type II cytoskeletal 1 |Homo sapiens	-0.228829
>P61599|NAA20_HUMAN N-alpha-acetyltransferase 20 |Homo sapiens	-0.228829
>O14737|PDCD5_HUMAN Programmed cell death protein 5 |Homo sapiens	-0.23122
>P10644|KAP0_HUMAN cAMP-dependent protein kinase type I-alpha regulatory subunit |Homo sapiens;>P31321|KAP1_HUMAN cAMP-dependent protein kinase type I-beta regulatory subunit |Homo sapiens	-0.233645
>Q9NVK5|FGOP2_HUMAN FGFR1 oncogene partner 2 |Homo sapiens	-0.234466
>Q99615|DNJC7_HUMAN DnaJ homolog subfamily C member 7 |Homo sapiens	-0.235087
>Q8IYB3|SRRM1_HUMAN Serine/arginine repetitive matrix protein 1 |Homo sapiens	-0.237523
>Q9NP66|HM20A_HUMAN High mobility group protein 20A |Homo sapiens	-0.237789
>P60712 SWISS-PROT:P60712 (Bos taurus) Actin, cytoplasmic 1;>P60709|ACTB_HUMAN Actin, cytoplasmic 1 |Homo sapiens	-0.241771
>Q15008|PSMD6_HUMAN 26S proteasome non-ATPase regulatory subunit 6 |Homo sapiens	-0.245221
>Q9Y608|LRRF2_HUMAN Leucine-rich repeat flightless-interacting protein 2 |Homo sapiens	-0.246042
>O75182|SIN3B_HUMAN Paired amphipathic helix protein Sin3b |Homo sapiens	-0.246097
>O95071|UBR5_HUMAN E3 ubiquitin-protein ligase UBR5 |Homo sapiens	-0.248221
>Q86V81|THOC4_HUMAN THO complex subunit 4 |Homo sapiens	-0.248316
>Q9UKY7|CDV3_HUMAN Protein CDV3 homolog |Homo sapiens	-0.249043
>P20930 SWISS-PROT:P20930 Tax_Id=9606 Gene_Symbol=FLG Filaggrin;>P20930|FILA_HUMAN Filaggrin |Homo sapiens	-0.249301
>P05455|LA_HUMAN Lupus La protein |Homo sapiens	-0.250249
>O43707|ACTN4_HUMAN Alpha-actinin-4 |Homo sapiens	-0.250369
>Q92990|GLMN_HUMAN Glomulin |Homo sapiens	-0.251342
>O00232|PSD12_HUMAN 26S proteasome non-ATPase regulatory subunit 12 |Homo sapiens	-0.251531
>P68371|TBB4B_HUMAN Tubulin beta-4B chain |Homo sapiens	-0.251846
>P52435|RPB11_HUMAN DNA-directed RNA polymerase II subunit RPB11-a |Homo sapiens;>Q9GZM3|RPB1B_HUMAN DNA-directed RNA polymerase II subunit RPB11-b1 |Homo sapiens;>Q9H1A7|RPB1C_HUMAN DNA-directed RNA polymerase II subunit RPB11-b2 |Homo sapiens	-0.252245
>P20042|IF2B_HUMAN Eukaryotic translation initiation factor 2 subunit 2 |Homo sapiens	-0.253942
>P35908|K22E_HUMAN Keratin, type II cytoskeletal 2 epidermal |Homo sapiens	-0.254336
>P63208|SKP1_HUMAN S-phase kinase-associated protein 1 |Homo sapiens	-0.254969
>Q6ZMI0|PPR21_HUMAN Protein phosphatase 1 regulatory subunit 21 |Homo sapiens	-0.255195
>P63279|UBC9_HUMAN SUMO-conjugating enzyme UBC9 |Homo sapiens	-0.255458
>P53999|TCP4_HUMAN Activated RNA polymerase II transcriptional coactivator p15 |Homo sapiens	-0.255477
>P0C0S8|H2A1_HUMAN Histone H2A type 1 |Homo sapiens;>P20671|H2A1D_HUMAN Histone H2A type 1-D |Homo sapiens;>Q6FI13|H2A2A_HUMAN Histone H2A type 2-A |Homo sapiens;>Q16777|H2A2C_HUMAN Histone H2A type 2-C |Homo sapiens;>Q9BTM1|H2AJ_HUMAN Histone H2A.J |Homo	-0.257762
>P49327|FAS_HUMAN Fatty acid synthase |Homo sapiens	-0.25841
>ENSEMBL:ENSBTAP00000016242 (Bos taurus) similar to alpha-tubulin I isoform 1;>P68363|TBA1B_HUMAN Tubulin alpha-1B chain |Homo sapiens;>P68366|TBA4A_HUMAN Tubulin alpha-4A chain |Homo sapiens;>Q9H853|TBA4B_HUMAN Putative tubulin-like protein alpha-4B |Homo	-0.258538
>Q8NEY8|PPHLN_HUMAN Periphilin-1 |Homo sapiens	-0.258633
>O43242|PSMD3_HUMAN 26S proteasome non-ATPase regulatory subunit 3 |Homo sapiens	-0.258783
>P05204|HMGN2_HUMAN Non-histone chromosomal protein HMG-17 |Homo sapiens	-0.258829
>Q9Y520|PRC2C_HUMAN Protein PRRC2C |Homo sapiens	-0.258871
>P35579|MYH9_HUMAN Myosin-9 |Homo sapiens	-0.261012
>Q9NVE7|PANK4_HUMAN Pantothenate kinase 4 |Homo sapiens	-0.262296
>Q6GYQ0|RGPA1_HUMAN Ral GTPase-activating protein subunit alpha-1 |Homo sapiens	-0.262594
>Q6P6C2|ALKB5_HUMAN Probable alpha-ketoglutarate-dependent dioxygenase ABH5 |Homo sapiens	-0.262747
>O43237|DC1L2_HUMAN Cytoplasmic dynein 1 light intermediate chain 2 |Homo sapiens	-0.265454
>P41586|PACR_HUMAN Pituitary adenylate cyclase-activating polypeptide type I receptor |Homo sapiens	-0.266916
>O60884|DNJA2_HUMAN DnaJ homolog subfamily A member 2 |Homo sapiens	-0.268124
>P19338|NUCL_HUMAN Nucleolin |Homo sapiens	-0.268923
>O76071|CIAO1_HUMAN Probable cytosolic iron-sulfur protein assembly protein CIAO1 |Homo sapiens	-0.271652
>P07910|HNRPC_HUMAN Heterogeneous nuclear ribonucleoproteins C1/C2 |Homo sapiens;>O60812|HNRCL_HUMAN Heterogeneous nuclear ribonucleoprotein C-like 1 |Homo sapiens	-0.274144
>Q9Y230|RUVB2_HUMAN RuvB-like 2 |Homo sapiens	-0.274424
>Q9BW92|SYTM_HUMAN Threonine--tRNA ligase, mitochondrial |Homo sapiens	-0.275109
>Q9BUF5|TBB6_HUMAN Tubulin beta-6 chain |Homo sapiens	-0.275587
>Q92973|TNPO1_HUMAN Transportin-1 |Homo sapiens;>O14787|TNPO2_HUMAN Transportin-2 |Homo sapiens	-0.277734
>P46013|KI67_HUMAN Antigen KI-67 |Homo sapiens	-0.279014
>O60869|EDF1_HUMAN Endothelial differentiation-related factor 1 |Homo sapiens	-0.280112
>P60712 SWISS-PROT:P60712 (Bos taurus) Actin, cytoplasmic 1;>P60709|ACTB_HUMAN Actin, cytoplasmic 1 |Homo sapiens;>Q6S8J3|POTEE_HUMAN POTE ankyrin domain family member E |Homo sapiens;>A5A3E0|POTEF_HUMAN POTE ankyrin domain family member F |Homo sapiens;>P	-0.282224
>Q9BVA1|TBB2B_HUMAN Tubulin beta-2B chain |Homo sapiens	-0.284154
>Q9BVQ7|SPA5L_HUMAN Spermatogenesis-associated protein 5-like protein 1 |Homo sapiens	-0.286355
>Q9NQA3|WASH6_HUMAN WAS protein family homolog 6 |Homo sapiens;>A8MWX3|WASH4_HUMAN Putative WAS protein family homolog 4 |Homo sapiens	-0.28687
>Q13555|KCC2G_HUMAN Calcium/calmodulin-dependent protein kinase type II subunit gamma |Homo sapiens;>Q13554|KCC2B_HUMAN Calcium/calmodulin-dependent protein kinase type II subunit beta |Homo sapiens	-0.288549
>Q3B726|RPA43_HUMAN DNA-directed RNA polymerase I subunit RPA43 |Homo sapiens	-0.288593
>Q9UHB6|LIMA1_HUMAN LIM domain and actin-binding protein 1 |Homo sapiens	-0.29019
>Q14204|DYHC1_HUMAN Cytoplasmic dynein 1 heavy chain 1 |Homo sapiens	-0.291671
>P15121|ALDR_HUMAN Aldose reductase |Homo sapiens	-0.293101
>P02754 SWISS-PROT:P02754 Beta-lactoglobulin - Bos taurus (Bovine).	-0.293664
>Q15427|SF3B4_HUMAN Splicing factor 3B subunit 4 |Homo sapiens	-0.295027
>Q8IXW5|RPAP2_HUMAN Putative RNA polymerase II subunit B1 CTD phosphatase RPAP2 |Homo sapiens	-0.295443
>Q9BW83|IFT27_HUMAN Intraflagellar transport protein 27 homolog |Homo sapiens	-0.295565
>P02533 SWISS-PROT:P02533 Tax_Id=9606 Gene_Symbol=KRT14 Keratin, type I cytoskeletal 14;>P02533|K1C14_HUMAN Keratin, type I cytoskeletal 14 |Homo sapiens;>P08779 SWISS-PROT:P08779 Tax_Id=9606 Gene_Symbol=KRT16 Keratin, type I cytoskeletal 16;>P08779|K1C16_	-0.295721
>Q8TC71|MIEAP_HUMAN Mitochondria-eating protein |Homo sapiens	-0.296341
>Q9BVC3|DCC1_HUMAN Sister chromatid cohesion protein DCC1 |Homo sapiens	-0.297726
>O14744|ANM5_HUMAN Protein arginine N-methyltransferase 5 |Homo sapiens	-0.298414
>P67809|YBOX1_HUMAN Nuclease-sensitive element-binding protein 1 |Homo sapiens	-0.298717
>O43488|ARK72_HUMAN Aflatoxin B1 aldehyde reductase member 2 |Homo sapiens	-0.298801
>Q13557|KCC2D_HUMAN Calcium/calmodulin-dependent protein kinase type II subunit delta |Homo sapiens;>Q9UQM7|KCC2A_HUMAN Calcium/calmodulin-dependent protein kinase type II subunit alpha |Homo sapiens;>Q13555|KCC2G_HUMAN Calcium/calmodulin-dependent protein	-0.299954
>P58876|H2B1D_HUMAN Histone H2B type 1-D |Homo sapiens;>P62807|H2B1C_HUMAN Histone H2B type 1-C/E/F/G/I |Homo sapiens;>Q5QNW6|H2B2F_HUMAN Histone H2B type 2-F |Homo sapiens;>Q93079|H2B1H_HUMAN Histone H2B type 1-H |Homo sapiens;>Q99877|H2B1N_HUMAN Histone	-0.300108
>P02668 SWISS-PROT:P02668 Kappa-casein [Contains: Casoxin C; Casoxin 6; Casoxin A; Casoxin B; Casoplatelin] - Bos taurus (Bovine).	-0.300717
>P02662 SWISS-PROT:P02662 Alpha-S1-casein - Bos taurus (Bovine).	-0.301826
>P02663 SWISS-PROT:P02663 Alpha-S2-casein [Contains: Casocidin-1 - Bos taurus (Bovine).	-0.304631
>P83731|RL24_HUMAN 60S ribosomal protein L24 |Homo sapiens	-0.305589
>P31689|DNJA1_HUMAN DnaJ homolog subfamily A member 1 |Homo sapiens	-0.305812
>Q9Y2S0|RPAC2_HUMAN DNA-directed RNA polymerases I and III subunit RPAC2 |Homo sapiens	-0.30723
>P61964|WDR5_HUMAN WD repeat-containing protein 5 |Homo sapiens	-0.307273
>P35579|MYH9_HUMAN Myosin-9 |Homo sapiens	-0.307756
>P12763 SWISS-PROT:P12763 (Bos taurus) Alpha-2-HS-glycoprotein precursor	-0.309397
>P10809|CH60_HUMAN 60 kDa heat shock protein, mitochondrial |Homo sapiens	-0.310032
>O43395|PRPF3_HUMAN U4/U6 small nuclear ribonucleoprotein Prp3 |Homo sapiens	-0.310564
>P41567|EIF1_HUMAN Eukaryotic translation initiation factor 1 |Homo sapiens	-0.312241
>P52565|GDIR1_HUMAN Rho GDP-dissociation inhibitor 1 |Homo sapiens	-0.312354
>Q5VTR2|BRE1A_HUMAN E3 ubiquitin-protein ligase BRE1A |Homo sapiens;>O75150|BRE1B_HUMAN E3 ubiquitin-protein ligase BRE1B |Homo sapiens	-0.312637
>Q8N7X0|CAN7L_HUMAN Calpain-7-like protein |Homo sapiens	-0.313701
>P35579|MYH9_HUMAN Myosin-9 |Homo sapiens;>P35580|MYH10_HUMAN Myosin-10 |Homo sapiens;>Q7Z406|MYH14_HUMAN Myosin-14 |Homo sapiens	-0.314277
>Q6P2C8|MED27_HUMAN Mediator of RNA polymerase II transcription subunit 27 |Homo sapiens	-0.315083
>P13647 SWISS-PROT:P13647 Tax_Id=9606 Gene_Symbol=KRT5 Keratin, type II cytoskeletal 5;>P13647|K2C5_HUMAN Keratin, type II cytoskeletal 5 |Homo sapiens;>P02538 SWISS-PROT:P02538 Tax_Id=9606 Gene_Symbol=KRT6A Keratin, type II cytoskeletal 6A;>P04259 SWISS-P	-0.315083
>Q13765|NACA_HUMAN Nascent polypeptide-associated complex subunit alpha |Homo sapiens;>Q9BZK3|NACP1_HUMAN Putative nascent polypeptide-associated complex subunit alpha-like protein |Homo sapiens	-0.315083
>Q15545|TAF7_HUMAN Transcription initiation factor TFIID subunit 7 |Homo sapiens	-0.315171
>P07900|HS90A_HUMAN Heat shock protein HSP 90-alpha |Homo sapiens;>Q14568|HS902_HUMAN Putative heat shock protein HSP 90-alpha A2 |Homo sapiens;>Q58FG0|HS905_HUMAN Putative heat shock protein HSP 90-alpha A5 |Homo sapiens	-0.315793
>Q8NEZ4|MLL3_HUMAN Histone-lysine N-methyltransferase MLL3 |Homo sapiens	-0.316107
>P18583|SON_HUMAN Protein SON |Homo sapiens	-0.317147
>P14174|MIF_HUMAN Macrophage migration inhibitory factor |Homo sapiens	-0.319538
>Q9H3U1|UN45A_HUMAN Protein unc-45 homolog A |Homo sapiens	-0.319577
>Q96P70|IPO9_HUMAN Importin-9 |Homo sapiens	-0.319746
>Q9BUL5|PHF23_HUMAN PHD finger protein 23 |Homo sapiens	-0.321065
>Q01469|FABP5_HUMAN Fatty acid-binding protein, epidermal |Homo sapiens;>A8MUU1|FB5L3_HUMAN Putative fatty acid-binding protein 5-like protein 3 |Homo sapiens	-0.323124
>O60664|PLIN3_HUMAN Perilipin-3 |Homo sapiens	-0.324606
>P25705|ATPA_HUMAN ATP synthase subunit alpha, mitochondrial |Homo sapiens	-0.326498
>P61026|RAB10_HUMAN Ras-related protein Rab-10 |Homo sapiens	-0.327226
>O95613|PCNT_HUMAN Pericentrin |Homo sapiens	-0.32803
>Q9NVP2|ASF1B_HUMAN Histone chaperone ASF1B |Homo sapiens	-0.329475
>P11441|UBL4A_HUMAN Ubiquitin-like protein 4A |Homo sapiens	-0.329963
>Q9NWB1|RFOX1_HUMAN RNA binding protein fox-1 homolog 1 |Homo sapiens;>O43251|RFOX2_HUMAN RNA binding protein fox-1 homolog 2 |Homo sapiens;>A6NFN3|RFOX3_HUMAN RNA binding protein fox-1 homolog 3 |Homo sapiens	-0.330201
>P06753|TPM3_HUMAN Tropomyosin alpha-3 chain |Homo sapiens;>P67936|TPM4_HUMAN Tropomyosin alpha-4 chain |Homo sapiens;>Q3SX28 TREMBL:Q3SX28;Q5KR48 (Bos taurus) Tropomyosin 2;>P07951|TPM2_HUMAN Tropomyosin beta chain |Homo sapiens;>P09493|TPM1_HUMAN Tropomy	-0.331892
>Q13347|EIF3I_HUMAN Eukaryotic translation initiation factor 3 subunit I |Homo sapiens	-0.332353
>P02666 SWISS-PROT:P02666 Beta-casein - Bos taurus (Bovine).	-0.334602
>O43583|DENR_HUMAN Density-regulated protein |Homo sapiens	-0.335506
>Q8N1G0|ZN687_HUMAN Zinc finger protein 687 |Homo sapiens	-0.335909
>P19388|RPAB1_HUMAN DNA-directed RNA polymerases I, II, and III subunit RPABC1 |Homo sapiens	-0.336584
>Q01469|FABP5_HUMAN Fatty acid-binding protein, epidermal |Homo sapiens	-0.336617
>P52435|RPB11_HUMAN DNA-directed RNA polymerase II subunit RPB11-a |Homo sapiens;>Q9GZM3|RPB1B_HUMAN DNA-directed RNA polymerase II subunit RPB11-b1 |Homo sapiens	-0.337114
>P0CAP2|GRL1A_HUMAN DNA-directed RNA polymerase II subunit GRINL1A |Homo sapiens;>Q9BZD3|GCOM2_HUMAN Putative GRINL1B complex locus protein 2 |Homo sapiens	-0.33736
>P53803|RPAB4_HUMAN DNA-directed RNA polymerases I, II, and III subunit RPABC4 |Homo sapiens	-0.337373
>P22087|FBRL_HUMAN rRNA 2-O-methyltransferase fibrillarin |Homo sapiens	-0.337434
>Q9UJX3|APC7_HUMAN Anaphase-promoting complex subunit 7 |Homo sapiens	-0.338087
>P49721|PSB2_HUMAN Proteasome subunit beta type-2 |Homo sapiens	-0.339865
>O00422|SAP18_HUMAN Histone deacetylase complex subunit SAP18 |Homo sapiens	-0.340124
>O15550|KDM6A_HUMAN Lysine-specific demethylase 6A |Homo sapiens	-0.340124
>P30086|PEBP1_HUMAN Phosphatidylethanolamine-binding protein 1 |Homo sapiens	-0.341536
>Q9H900|ZWILC_HUMAN Protein zwilch homolog |Homo sapiens	-0.343336
>O60271|JIP4_HUMAN C-Jun-amino-terminal kinase-interacting protein 4 |Homo sapiens;>Q9UPT6|JIP3_HUMAN C-Jun-amino-terminal kinase-interacting protein 3 |Homo sapiens	-0.343635
>Q96IJ6|GMPPA_HUMAN Mannose-1-phosphate guanyltransferase alpha |Homo sapiens	-0.344175
>Q13885|TBB2A_HUMAN Tubulin beta-2A chain |Homo sapiens	-0.345369
>Q15287|RNPS1_HUMAN RNA-binding protein with serine-rich domain 1 |Homo sapiens	-0.347523
>P11142|HSP7C_HUMAN Heat shock cognate 71 kDa protein |Homo sapiens;>P54652|HSP72_HUMAN Heat shock-related 70 kDa protein 2 |Homo sapiens;>P08107|HSP71_HUMAN Heat shock 70 kDa protein 1A/1B |Homo sapiens	-0.34844
>P10644|KAP0_HUMAN cAMP-dependent protein kinase type I-alpha regulatory subunit |Homo sapiens	-0.349145
>P08579|RU2B_HUMAN U2 small nuclear ribonucleoprotein B |Homo sapiens	-0.349555
>Q9BQA1|MEP50_HUMAN Methylosome protein 50 |Homo sapiens	-0.350509
>P02533 SWISS-PROT:P02533 Tax_Id=9606 Gene_Symbol=KRT14 Keratin, type I cytoskeletal 14;>P02533|K1C14_HUMAN Keratin, type I cytoskeletal 14 |Homo sapiens;>P08779 SWISS-PROT:P08779 Tax_Id=9606 Gene_Symbol=KRT16 Keratin, type I cytoskeletal 16;>P08779|K1C16_	-0.35239
>P28070|PSB4_HUMAN Proteasome subunit beta type-4 |Homo sapiens	-0.35293
>O15160|RPAC1_HUMAN DNA-directed RNA polymerases I and III subunit RPAC1 |Homo sapiens	-0.352933
>P17612|KAPCA_HUMAN cAMP-dependent protein kinase catalytic subunit alpha |Homo sapiens	-0.353783
>Q9UKV3|ACINU_HUMAN Apoptotic chromatin condensation inducer in the nucleus |Homo sapiens	-0.355186
>Q9H871|RMD5A_HUMAN Protein RMD5 homolog A |Homo sapiens;>Q96G75|RMD5B_HUMAN Protein RMD5 homolog B |Homo sapiens	-0.355844
>Q9UFH2|DYH17_HUMAN Dynein heavy chain 17, axonemal |Homo sapiens	-0.356618
>P63172|DYLT1_HUMAN Dynein light chain Tctex-type 1 |Homo sapiens	-0.358705
>P62937|PPIA_HUMAN Peptidyl-prolyl cis-trans isomerase A |Homo sapiens;>Q9Y536|PAL4A_HUMAN Peptidyl-prolyl cis-trans isomerase A-like 4A/B/C |Homo sapiens;>A2BFH1|PAL4G_HUMAN Peptidyl-prolyl cis-trans isomerase A-like 4G |Homo sapiens	-0.358795
>Q9Y6G9|DC1L1_HUMAN Cytoplasmic dynein 1 light intermediate chain 1 |Homo sapiens	-0.359611
>P60712 SWISS-PROT:P60712 (Bos taurus) Actin, cytoplasmic 1;>P60709|ACTB_HUMAN Actin, cytoplasmic 1 |Homo sapiens;>Q6S8J3|POTEE_HUMAN POTE ankyrin domain family member E |Homo sapiens;>A5A3E0|POTEF_HUMAN POTE ankyrin domain family member F |Homo sapiens;>Q	-0.361184
>O15371|EIF3D_HUMAN Eukaryotic translation initiation factor 3 subunit D |Homo sapiens	-0.361586
>Q9Y366|IFT52_HUMAN Intraflagellar transport protein 52 homolog |Homo sapiens	-0.364512
>P18669|PGAM1_HUMAN Phosphoglycerate mutase 1 |Homo sapiens;>Q8N0Y7|PGAM4_HUMAN Probable phosphoglycerate mutase 4 |Homo sapiens	-0.365825
>Q9HC98|NEK6_HUMAN Serine/threonine-protein kinase Nek6 |Homo sapiens	-0.367755
>O00303|EIF3F_HUMAN Eukaryotic translation initiation factor 3 subunit F |Homo sapiens	-0.367942
>O14654|IRS4_HUMAN Insulin receptor substrate 4 |Homo sapiens	-0.368107
>Q96RN5|MED15_HUMAN Mediator of RNA polymerase II transcription subunit 15 |Homo sapiens	-0.369359
>Q14202|ZMYM3_HUMAN Zinc finger MYM-type protein 3 |Homo sapiens	-0.370896
>P62820|RAB1A_HUMAN Ras-related protein Rab-1A |Homo sapiens	-0.372166
>Q96S59|RANB9_HUMAN Ran-binding protein 9 |Homo sapiens;>Q6VN20|RBP10_HUMAN Ran-binding protein 10 |Homo sapiens	-0.372748
>Q9NQ48|LZTL1_HUMAN Leucine zipper transcription factor-like protein 1 |Homo sapiens	-0.373076
>P62258|1433E_HUMAN 14-3-3 protein epsilon |Homo sapiens	-0.37327
>P07437|TBB5_HUMAN Tubulin beta chain |Homo sapiens;>P68371|TBB4B_HUMAN Tubulin beta-4B chain |Homo sapiens;>Q9BVA1|TBB2B_HUMAN Tubulin beta-2B chain |Homo sapiens;>Q13885|TBB2A_HUMAN Tubulin beta-2A chain |Homo sapiens;>P04350|TBB4A_HUMAN Tubulin beta-4A	-0.377213
>Q9P2J5|SYLC_HUMAN Leucine--tRNA ligase, cytoplasmic |Homo sapiens	-0.379077
>Q9NS87|KIF15_HUMAN Kinesin-like protein KIF15 |Homo sapiens	-0.379309
>Q8WZ42|TITIN_HUMAN Titin |Homo sapiens	-0.380048
>Q3KP66|CA106_HUMAN Uncharacterized protein C1orf106 |Homo sapiens	-0.380254
>P09651|ROA1_HUMAN Heterogeneous nuclear ribonucleoprotein A1 |Homo sapiens	-0.380372
>O14818|PSA7_HUMAN Proteasome subunit alpha type-7 |Homo sapiens;>Q8TAA3|PSA7L_HUMAN Proteasome subunit alpha type-7-like |Homo sapiens	-0.384388
>P49773|HINT1_HUMAN Histidine triad nucleotide-binding protein 1 |Homo sapiens	-0.384577
>P49720|PSB3_HUMAN Proteasome subunit beta type-3 |Homo sapiens	-0.385156
>Q7Z589|EMSY_HUMAN Protein EMSY |Homo sapiens	-0.385291
>O94906|PRP6_HUMAN Pre-mRNA-processing factor 6 |Homo sapiens	-0.385765
>P05166|PCCB_HUMAN Propionyl-CoA carboxylase beta chain, mitochondrial |Homo sapiens	-0.386032
>Q13151|ROA0_HUMAN Heterogeneous nuclear ribonucleoprotein A0 |Homo sapiens	-0.386036
>Q9Y3C7|MED31_HUMAN Mediator of RNA polymerase II transcription subunit 31 |Homo sapiens	-0.386126
>Q01105|SET_HUMAN Protein SET |Homo sapiens	-0.386285
>Q9UPP1|PHF8_HUMAN Histone lysine demethylase PHF8 |Homo sapiens	-0.387516
>P25788|PSA3_HUMAN Proteasome subunit alpha type-3 |Homo sapiens	-0.389626
>P11182|ODB2_HUMAN Lipoamide acyltransferase component of branched-chain alpha-keto acid dehydrogenase complex, mitochondrial |Homo sapiens	-0.389712
>Q9BRP4|PAAF1_HUMAN Proteasomal ATPase-associated factor 1 |Homo sapiens	-0.389721
>Q07812|BAX_HUMAN Apoptosis regulator BAX |Homo sapiens	-0.390438
>P28074|PSB5_HUMAN Proteasome subunit beta type-5 |Homo sapiens	-0.391327
>O15372|EIF3H_HUMAN Eukaryotic translation initiation factor 3 subunit H |Homo sapiens	-0.391964
>P35579|MYH9_HUMAN Myosin-9 |Homo sapiens;>Q7Z406|MYH14_HUMAN Myosin-14 |Homo sapiens	-0.393011
>P28072|PSB6_HUMAN Proteasome subunit beta type-6 |Homo sapiens	-0.393062
>Q4ZHG4|FNDC1_HUMAN Fibronectin type III domain-containing protein 1 |Homo sapiens	-0.393202
>P29692|EF1D_HUMAN Elongation factor 1-delta |Homo sapiens;>P24534|EF1B_HUMAN Elongation factor 1-beta |Homo sapiens	-0.394187
>P25787|PSA2_HUMAN Proteasome subunit alpha type-2 |Homo sapiens	-0.394221
>P61254|RL26_HUMAN 60S ribosomal protein L26 |Homo sapiens;>Q9UNX3|RL26L_HUMAN 60S ribosomal protein L26-like 1 |Homo sapiens	-0.395653
>Q14192|FHL2_HUMAN Four and a half LIM domains protein 2 |Homo sapiens	-0.395862
>P55884|EIF3B_HUMAN Eukaryotic translation initiation factor 3 subunit B |Homo sapiens	-0.396065
>Q96LB3|IFT74_HUMAN Intraflagellar transport protein 74 homolog |Homo sapiens	-0.396423
>P20618|PSB1_HUMAN Proteasome subunit beta type-1 |Homo sapiens	-0.397434
>Q99436|PSB7_HUMAN Proteasome subunit beta type-7 |Homo sapiens	-0.397679
>P25786|PSA1_HUMAN Proteasome subunit alpha type-1 |Homo sapiens	-0.398505
>Q5SW79|CE170_HUMAN Centrosomal protein of 170 kDa |Homo sapiens;>Q96L14|C170L_HUMAN Cep170-like protein |Homo sapiens	-0.39851
>Q13183|S13A2_HUMAN Solute carrier family 13 member 2 |Homo sapiens	-0.398647
>P07814|SYEP_HUMAN Bifunctional glutamate/proline--tRNA ligase |Homo sapiens	-0.398758
>P25789|PSA4_HUMAN Proteasome subunit alpha type-4 |Homo sapiens	-0.39902
>Q7L5D6|GET4_HUMAN Golgi to ER traffic protein 4 homolog |Homo sapiens	-0.399321
>P20290|BTF3_HUMAN Transcription factor BTF3 |Homo sapiens	-0.399387
>P60900|PSA6_HUMAN Proteasome subunit alpha type-6 |Homo sapiens	-0.402319
>P61981|1433G_HUMAN 14-3-3 protein gamma |Homo sapiens	-0.403312
>Q9NVH2|INT7_HUMAN Integrator complex subunit 7 |Homo sapiens	-0.403558
>P58876|H2B1D_HUMAN Histone H2B type 1-D |Homo sapiens;>P62807|H2B1C_HUMAN Histone H2B type 1-C/E/F/G/I |Homo sapiens;>Q5QNW6|H2B2F_HUMAN Histone H2B type 2-F |Homo sapiens;>Q93079|H2B1H_HUMAN Histone H2B type 1-H |Homo sapiens;>Q99877|H2B1N_HUMAN Histone	-0.404623
>Q13315|ATM_HUMAN Serine-protein kinase ATM |Homo sapiens	-0.404896
>Q9Y237|PIN4_HUMAN Peptidyl-prolyl cis-trans isomerase NIMA-interacting 4 |Homo sapiens	-0.405759
>P40227|TCPZ_HUMAN T-complex protein 1 subunit zeta |Homo sapiens;>Q92526|TCPW_HUMAN T-complex protein 1 subunit zeta-2 |Homo sapiens	-0.406246
>P07437|TBB5_HUMAN Tubulin beta chain |Homo sapiens	-0.408302
>O00231|PSD11_HUMAN 26S proteasome non-ATPase regulatory subunit 11 |Homo sapiens	-0.408506
>Q9Y333|LSM2_HUMAN U6 snRNA-associated Sm-like protein LSm2 |Homo sapiens	-0.408668
>P28066|PSA5_HUMAN Proteasome subunit alpha type-5 |Homo sapiens	-0.409686
>Q8IUR7|ARMC8_HUMAN Armadillo repeat-containing protein 8 |Homo sapiens	-0.410194
>Q9NWU2|CT011_HUMAN Protein C20orf11 |Homo sapiens	-0.410791
>Q99575|POP1_HUMAN Ribonucleases P/MRP protein subunit POP1 |Homo sapiens	-0.412463
>Q9BQE3|TBA1C_HUMAN Tubulin alpha-1C chain |Homo sapiens	-0.412467
>Q9Y5K5|UCHL5_HUMAN Ubiquitin carboxyl-terminal hydrolase isozyme L5 |Homo sapiens	-0.412977
>Q15648|MED1_HUMAN Mediator of RNA polymerase II transcription subunit 1 |Homo sapiens	-0.413182
>Q9BWU0|NADAP_HUMAN Kanadaptin |Homo sapiens	-0.413297
>P36954|RPB9_HUMAN DNA-directed RNA polymerase II subunit RPB9 |Homo sapiens	-0.414026
>Q15365|PCBP1_HUMAN Poly(rC)-binding protein 1 |Homo sapiens	-0.414728
>P60712 SWISS-PROT:P60712 (Bos taurus) Actin, cytoplasmic 1;>P60709|ACTB_HUMAN Actin, cytoplasmic 1 |Homo sapiens;>P63261|ACTG_HUMAN Actin, cytoplasmic 2 |Homo sapiens	-0.415089
>P30876|RPB2_HUMAN DNA-directed RNA polymerase II subunit RPB2 |Homo sapiens	-0.415399
>Q9UJC3|HOOK1_HUMAN Protein Hook homolog 1 |Homo sapiens	-0.417427
>Q15366|PCBP2_HUMAN Poly(rC)-binding protein 2 |Homo sapiens;>P57721|PCBP3_HUMAN Poly(rC)-binding protein 3 |Homo sapiens;>Q15365|PCBP1_HUMAN Poly(rC)-binding protein 1 |Homo sapiens	-0.418108
>O95619|YETS4_HUMAN YEATS domain-containing protein 4 |Homo sapiens	-0.418657
>O00487|PSDE_HUMAN 26S proteasome non-ATPase regulatory subunit 14 |Homo sapiens	-0.419261
>P11217|PYGM_HUMAN Glycogen phosphorylase, muscle form |Homo sapiens	-0.419497
>P19387|RPB3_HUMAN DNA-directed RNA polymerase II subunit RPB3 |Homo sapiens	-0.420053
>O14950|ML12B_HUMAN Myosin regulatory light chain 12B |Homo sapiens;>P19105|ML12A_HUMAN Myosin regulatory light chain 12A |Homo sapiens;>P24844|MYL9_HUMAN Myosin regulatory light polypeptide 9 |Homo sapiens	-0.420941
>P52597|HNRPF_HUMAN Heterogeneous nuclear ribonucleoprotein F |Homo sapiens	-0.421254
>Q99460|PSMD1_HUMAN 26S proteasome non-ATPase regulatory subunit 1 |Homo sapiens	-0.423113
>P15311|EZRI_HUMAN Ezrin |Homo sapiens;>P26038|MOES_HUMAN Moesin |Homo sapiens;>P35241|RADI_HUMAN Radixin |Homo sapiens	-0.42396
>P41252|SYIC_HUMAN Isoleucine--tRNA ligase, cytoplasmic |Homo sapiens	-0.424932
>O14818|PSA7_HUMAN Proteasome subunit alpha type-7 |Homo sapiens	-0.425631
>P61956|SUMO2_HUMAN Small ubiquitin-related modifier 2 |Homo sapiens	-0.426593
>Q71U36|TBA1A_HUMAN Tubulin alpha-1A chain |Homo sapiens;>Q13748|TBA3C_HUMAN Tubulin alpha-3C/D chain |Homo sapiens;>Q6PEY2|TBA3E_HUMAN Tubulin alpha-3E chain |Homo sapiens	-0.427905
>Q9GZZ1|NAA50_HUMAN N-alpha-acetyltransferase 50 |Homo sapiens	-0.428201
>A0JLT2|MED19_HUMAN Mediator of RNA polymerase II transcription subunit 19 |Homo sapiens	-0.430714
>Q12962|TAF10_HUMAN Transcription initiation factor TFIID subunit 10 |Homo sapiens	-0.430961
>O75821|EIF3G_HUMAN Eukaryotic translation initiation factor 3 subunit G |Homo sapiens	-0.432167
>P27708|PYR1_HUMAN CAD protein |Homo sapiens	-0.43256
>P56192|SYMC_HUMAN Methionine--tRNA ligase, cytoplasmic |Homo sapiens	-0.433406
>Q9Y597|KCTD3_HUMAN BTB/POZ domain-containing protein KCTD3 |Homo sapiens	-0.433853
>Q96G25|MED8_HUMAN Mediator of RNA polymerase II transcription subunit 8 |Homo sapiens	-0.43495
>P49006|MRP_HUMAN MARCKS-related protein |Homo sapiens	-0.435159
>P78527|PRKDC_HUMAN DNA-dependent protein kinase catalytic subunit |Homo sapiens	-0.435306
>Q9Y266|NUDC_HUMAN Nuclear migration protein nudC |Homo sapiens	-0.435525
>Q7L5Y9|MAEA_HUMAN Macrophage erythroblast attacher |Homo sapiens	-0.435784
>Q9UHX1|PUF60_HUMAN Poly(U)-binding-splicing factor PUF60 |Homo sapiens	-0.436052
>P35637|FUS_HUMAN RNA-binding protein FUS |Homo sapiens	-0.436064
>A5YKK6|CNOT1_HUMAN CCR4-NOT transcription complex subunit 1 |Homo sapiens	-0.436719
>ENSEMBL:ENSBTAP00000016242 (Bos taurus) similar to alpha-tubulin I isoform 1;>P68363|TBA1B_HUMAN Tubulin alpha-1B chain |Homo sapiens;>P68366|TBA4A_HUMAN Tubulin alpha-4A chain |Homo sapiens;>A6NHL2|TBAL3_HUMAN Tubulin alpha chain-like 3 |Homo sapiens;>Q7	-0.438143
>P50748|KNTC1_HUMAN Kinetochore-associated protein 1 |Homo sapiens	-0.438835
>P26583|HMGB2_HUMAN High mobility group protein B2 |Homo sapiens	-0.438951
>Q8N201|INT1_HUMAN Integrator complex subunit 1 |Homo sapiens	-0.438972
>P47897|SYQ_HUMAN Glutamine--tRNA ligase |Homo sapiens	-0.439287
>Q9BPZ7|SIN1_HUMAN Target of rapamycin complex 2 subunit MAPKAP1 |Homo sapiens	-0.441255
>Q4VC05|BCL7A_HUMAN B-cell CLL/lymphoma 7 protein family member A |Homo sapiens;>Q9BQE9|BCL7B_HUMAN B-cell CLL/lymphoma 7 protein family member B |Homo sapiens;>Q8WUZ0|BCL7C_HUMAN B-cell CLL/lymphoma 7 protein family member C |Homo sapiens	-0.441631
>Q7Z7C8|TAF8_HUMAN Transcription initiation factor TFIID subunit 8 |Homo sapiens	-0.443124
>P52434|RPAB3_HUMAN DNA-directed RNA polymerases I, II, and III subunit RPABC3 |Homo sapiens	-0.443615
>P42771|CD2A1_HUMAN Cyclin-dependent kinase inhibitor 2A, isoforms 1/2/3 |Homo sapiens	-0.443753
>Q9Y2W1|TR150_HUMAN Thyroid hormone receptor-associated protein 3 |Homo sapiens	-0.443947
>O00273|DFFA_HUMAN DNA fragmentation factor subunit alpha |Homo sapiens	-0.444454
>P67809|YBOX1_HUMAN Nuclease-sensitive element-binding protein 1 |Homo sapiens;>Q9Y2T7|YBOX2_HUMAN Y-box-binding protein 2 |Homo sapiens;>P16989|DBPA_HUMAN DNA-binding protein A |Homo sapiens	-0.44473
>P60712 SWISS-PROT:P60712 (Bos taurus) Actin, cytoplasmic 1;>P60709|ACTB_HUMAN Actin, cytoplasmic 1 |Homo sapiens;>Q6S8J3|POTEE_HUMAN POTE ankyrin domain family member E |Homo sapiens;>A5A3E0|POTEF_HUMAN POTE ankyrin domain family member F |Homo sapiens;>P	-0.445243
>O15318|RPC7_HUMAN DNA-directed RNA polymerase III subunit RPC7 |Homo sapiens	-0.445289
>P61970|NTF2_HUMAN Nuclear transport factor 2 |Homo sapiens	-0.445769
>Q9H871|RMD5A_HUMAN Protein RMD5 homolog A |Homo sapiens	-0.446033
>P63241|IF5A1_HUMAN Eukaryotic translation initiation factor 5A-1 |Homo sapiens;>Q6IS14|IF5AL_HUMAN Eukaryotic translation initiation factor 5A-1-like |Homo sapiens;>Q9GZV4|IF5A2_HUMAN Eukaryotic translation initiation factor 5A-2 |Homo sapiens	-0.44653
>Q9NZI8|IF2B1_HUMAN Insulin-like growth factor 2 mRNA-binding protein 1 |Homo sapiens;>Q9Y6M1|IF2B2_HUMAN Insulin-like growth factor 2 mRNA-binding protein 2 |Homo sapiens;>O00425|IF2B3_HUMAN Insulin-like growth factor 2 mRNA-binding protein 3 |Homo sapien	-0.446618
>Q8IWZ3|ANKH1_HUMAN Ankyrin repeat and KH domain-containing protein 1 |Homo sapiens	-0.446789
>Q14152|EIF3A_HUMAN Eukaryotic translation initiation factor 3 subunit A |Homo sapiens	-0.447471
>O43264|ZW10_HUMAN Centromere/kinetochore protein zw10 homolog |Homo sapiens	-0.448887
>P09429|HMGB1_HUMAN High mobility group protein B1 |Homo sapiens;>B2RPK0|HGB1A_HUMAN Putative high mobility group protein B1-like 1 |Homo sapiens;>P23497|SP100_HUMAN Nuclear autoantigen Sp-100 |Homo sapiens	-0.450101
>Q9C0C2|TB182_HUMAN 182 kDa tankyrase-1-binding protein |Homo sapiens	-0.450869
>ENSEMBL:ENSBTAP00000024146 (Bos taurus) similar to alpha-2-macroglobulin isoform 1;>P20742|PZP_HUMAN Pregnancy zone protein |Homo sapiens;>P01023|A2MG_HUMAN Alpha-2-macroglobulin |Homo sapiens	-0.451053
>P61218|RPAB2_HUMAN DNA-directed RNA polymerases I, II, and III subunit RPABC2 |Homo sapiens	-0.451574
>P16949|STMN1_HUMAN Stathmin |Homo sapiens	-0.452239
>Q9UIV1|CNOT7_HUMAN CCR4-NOT transcription complex subunit 7 |Homo sapiens	-0.452542
>Q8NFJ9|BBS1_HUMAN Bardet-Biedl syndrome 1 protein |Homo sapiens	-0.452974
>Q9NZN8|CNOT2_HUMAN CCR4-NOT transcription complex subunit 2 |Homo sapiens	-0.453812
>Q13409|DC1I2_HUMAN Cytoplasmic dynein 1 intermediate chain 2 |Homo sapiens;>O14576|DC1I1_HUMAN Cytoplasmic dynein 1 intermediate chain 1 |Homo sapiens	-0.454042
>P68032|ACTC_HUMAN Actin, alpha cardiac muscle 1 |Homo sapiens;>P68133|ACTS_HUMAN Actin, alpha skeletal muscle |Homo sapiens;>P62736|ACTA_HUMAN Actin, aortic smooth muscle |Homo sapiens;>P63267|ACTH_HUMAN Actin, gamma-enteric smooth muscle |Homo sapiens	-0.454962
>P35908|K22E_HUMAN Keratin, type II cytoskeletal 2 epidermal |Homo sapiens;>P35908 SWISS-PROT:P35908 Tax_Id=9606 Gene_Symbol=KRT2 Keratin, type II cytoskeletal 2 epidermal;>Q7Z794 SWISS-PROT:Q7Z794 Tax_Id=9606 Gene_Symbol=KRT77 Keratin 77;>Q7Z794|K2C1B_HUM	-0.455026
>Q07666|KHDR1_HUMAN KH domain-containing, RNA-binding, signal transduction-associated protein 1 |Homo sapiens	-0.455252
>Q15366|PCBP2_HUMAN Poly(rC)-binding protein 2 |Homo sapiens	-0.455521
>P84098|RL19_HUMAN 60S ribosomal protein L19 |Homo sapiens	-0.455553
>P52907|CAZA1_HUMAN F-actin-capping protein subunit alpha-1 |Homo sapiens;>P47755|CAZA2_HUMAN F-actin-capping protein subunit alpha-2 |Homo sapiens	-0.455788
>ENSEMBL:ENSBTAP00000016242 (Bos taurus) similar to alpha-tubulin I isoform 1;>P68363|TBA1B_HUMAN Tubulin alpha-1B chain |Homo sapiens;>P68366|TBA4A_HUMAN Tubulin alpha-4A chain |Homo sapiens	-0.456165
>O75818|RPP40_HUMAN Ribonuclease P protein subunit p40 |Homo sapiens	-0.456831
>Q9H7D7|WDR26_HUMAN WD repeat-containing protein 26 |Homo sapiens	-0.456852
>O75643|U520_HUMAN U5 small nuclear ribonucleoprotein 200 kDa helicase |Homo sapiens	-0.457344
>Q04726|TLE3_HUMAN Transducin-like enhancer protein 3 |Homo sapiens	-0.457464
>Q13557|KCC2D_HUMAN Calcium/calmodulin-dependent protein kinase type II subunit delta |Homo sapiens	-0.457645
>Q9H9B1|EHMT1_HUMAN Histone-lysine N-methyltransferase EHMT1 |Homo sapiens	-0.458561
>P07900|HS90A_HUMAN Heat shock protein HSP 90-alpha |Homo sapiens;>Q14568|HS902_HUMAN Putative heat shock protein HSP 90-alpha A2 |Homo sapiens	-0.459833
>Q9NYL9|TMOD3_HUMAN Tropomodulin-3 |Homo sapiens	-0.460131
>P48556|PSMD8_HUMAN 26S proteasome non-ATPase regulatory subunit 8 |Homo sapiens	-0.460401
>P24928|RPB1_HUMAN DNA-directed RNA polymerase II subunit RPB1 |Homo sapiens	-0.460547
>Q15046|SYK_HUMAN Lysine--tRNA ligase |Homo sapiens	-0.462303
>O43324|MCA3_HUMAN Eukaryotic translation elongation factor 1 epsilon-1 |Homo sapiens	-0.462568
>Q96RQ3|MCCA_HUMAN Methylcrotonoyl-CoA carboxylase subunit alpha, mitochondrial |Homo sapiens	-0.462901
>P0CG48|UBC_HUMAN Polyubiquitin-C |Homo sapiens;>P0CG47|UBB_HUMAN Polyubiquitin-B |Homo sapiens;>P62979|RS27A_HUMAN Ubiquitin-40S ribosomal protein S27a |Homo sapiens;>P62987|RL40_HUMAN Ubiquitin-60S ribosomal protein L40 |Homo sapiens	-0.462907
>P40227|TCPZ_HUMAN T-complex protein 1 subunit zeta |Homo sapiens	-0.463627
>Q71U36|TBA1A_HUMAN Tubulin alpha-1A chain |Homo sapiens;>Q13748|TBA3C_HUMAN Tubulin alpha-3C/D chain |Homo sapiens;>Q6PEY2|TBA3E_HUMAN Tubulin alpha-3E chain |Homo sapiens;>Q9BQE3|TBA1C_HUMAN Tubulin alpha-1C chain |Homo sapiens	-0.464334
>Q14980|NUMA1_HUMAN Nuclear mitotic apparatus protein 1 |Homo sapiens	-0.465569
>P08670|VIME_HUMAN Vimentin |Homo sapiens;>P41219|PERI_HUMAN Peripherin |Homo sapiens	-0.465892
>P63241|IF5A1_HUMAN Eukaryotic translation initiation factor 5A-1 |Homo sapiens;>Q6IS14|IF5AL_HUMAN Eukaryotic translation initiation factor 5A-1-like |Homo sapiens	-0.466157
>P67809|YBOX1_HUMAN Nuclease-sensitive element-binding protein 1 |Homo sapiens;>P16989|DBPA_HUMAN DNA-binding protein A |Homo sapiens	-0.466606
>P35580|MYH10_HUMAN Myosin-10 |Homo sapiens	-0.466977
>Q13200|PSMD2_HUMAN 26S proteasome non-ATPase regulatory subunit 2 |Homo sapiens	-0.467114
>P84090|ERH_HUMAN Enhancer of rudimentary homolog |Homo sapiens	-0.467328
>P35579|MYH9_HUMAN Myosin-9 |Homo sapiens;>P35580|MYH10_HUMAN Myosin-10 |Homo sapiens	-0.468541
>Q9UBQ5|EIF3K_HUMAN Eukaryotic translation initiation factor 3 subunit K |Homo sapiens	-0.468585
>P11142|HSP7C_HUMAN Heat shock cognate 71 kDa protein |Homo sapiens;>P54652|HSP72_HUMAN Heat shock-related 70 kDa protein 2 |Homo sapiens;>P11021|GRP78_HUMAN 78 kDa glucose-regulated protein |Homo sapiens	-0.468586
>Q3ZCM7|TBB8_HUMAN Tubulin beta-8 chain |Homo sapiens;>A6NNZ2|TBB8B_HUMAN Tubulin beta-8 chain B |Homo sapiens;>A6NKZ8|YI016_HUMAN Putative tubulin beta chain-like protein ENSP00000290377 |Homo sapiens;>Q9H4B7|TBB1_HUMAN Tubulin beta-1 chain |Homo sapiens;	-0.468731
>Q96GM5|SMRD1_HUMAN SWI/SNF-related matrix-associated actin-dependent regulator of chromatin subfamily D member 1 |Homo sapiens;>Q92925|SMRD2_HUMAN SWI/SNF-related matrix-associated actin-dependent regulator of chromatin subfamily D member 2 |Homo sapiens	-0.469634
>Q96S59|RANB9_HUMAN Ran-binding protein 9 |Homo sapiens	-0.470179
>ENSEMBL:ENSBTAP00000025008 (Bos taurus) hypothetical protein	-0.470759
>Q9H981|ARP8_HUMAN Actin-related protein 8 |Homo sapiens	-0.470899
>P62699|YPEL5_HUMAN Protein yippee-like 5 |Homo sapiens	-0.470985
>Q9NTJ4|MA2C1_HUMAN Alpha-mannosidase 2C1 |Homo sapiens	-0.472611
>P02533 SWISS-PROT:P02533 Tax_Id=9606 Gene_Symbol=KRT14 Keratin, type I cytoskeletal 14;>P02533|K1C14_HUMAN Keratin, type I cytoskeletal 14 |Homo sapiens;>Q04695 SWISS-PROT:Q04695 Tax_Id=9606 Gene_Symbol=KRT17 Keratin, type I cytoskeletal 17;>Q04695|K1C17_	-0.472846
>P50991|TCPD_HUMAN T-complex protein 1 subunit delta |Homo sapiens	-0.475376
>Q6VN20|RBP10_HUMAN Ran-binding protein 10 |Homo sapiens	-0.476068
>Q6IA86|ELP2_HUMAN Elongator complex protein 2 |Homo sapiens	-0.476126
>O15514|RPB4_HUMAN DNA-directed RNA polymerase II subunit RPB4 |Homo sapiens	-0.476371
>P02794|FRIH_HUMAN Ferritin heavy chain |Homo sapiens	-0.47659
>Q15542|TAF5_HUMAN Transcription initiation factor TFIID subunit 5 |Homo sapiens	-0.477416
>O00399|DCTN6_HUMAN Dynactin subunit 6 |Homo sapiens	-0.478544
>Q13018|PLA2R_HUMAN Secretory phospholipase A2 receptor |Homo sapiens	-0.480586
>P50990|TCPQ_HUMAN T-complex protein 1 subunit theta |Homo sapiens	-0.480965
>Q3ZCM7|TBB8_HUMAN Tubulin beta-8 chain |Homo sapiens;>P07437|TBB5_HUMAN Tubulin beta chain |Homo sapiens;>P68371|TBB4B_HUMAN Tubulin beta-4B chain |Homo sapiens;>Q9BVA1|TBB2B_HUMAN Tubulin beta-2B chain |Homo sapiens;>Q13885|TBB2A_HUMAN Tubulin beta-2A ch	-0.481277
>P52435|RPB11_HUMAN DNA-directed RNA polymerase II subunit RPB11-a |Homo sapiens	-0.481774
>P11940|PABP1_HUMAN Polyadenylate-binding protein 1 |Homo sapiens;>Q9H361|PABP3_HUMAN Polyadenylate-binding protein 3 |Homo sapiens;>Q5JQF8|PAP1M_HUMAN Polyadenylate-binding protein 1-like 2 |Homo sapiens	-0.482058
>P60228|EIF3E_HUMAN Eukaryotic translation initiation factor 3 subunit E |Homo sapiens	-0.482888
>Q13155|AIMP2_HUMAN Aminoacyl tRNA synthase complex-interacting multifunctional protein 2 |Homo sapiens	-0.483288
>Q04637|IF4G1_HUMAN Eukaryotic translation initiation factor 4 gamma 1 |Homo sapiens;>O43432|IF4G3_HUMAN Eukaryotic translation initiation factor 4 gamma 3 |Homo sapiens	-0.483941
>P08670|VIME_HUMAN Vimentin |Homo sapiens;>Q9H552 TREMBL:Q9H552 Tax_Id=9606 Gene_Symbol=- Keratin-8-like protein 1;>P41219|PERI_HUMAN Peripherin |Homo sapiens;>P17661|DESM_HUMAN Desmin |Homo sapiens	-0.483951
>ENSEMBL:ENSBTAP00000016242 (Bos taurus) similar to alpha-tubulin I isoform 1;>P68363|TBA1B_HUMAN Tubulin alpha-1B chain |Homo sapiens;>P68366|TBA4A_HUMAN Tubulin alpha-4A chain |Homo sapiens;>Q71U36|TBA1A_HUMAN Tubulin alpha-1A chain |Homo sapiens;>Q13748	-0.483965
>P62487|RPB7_HUMAN DNA-directed RNA polymerase II subunit RPB7 |Homo sapiens	-0.484246
>Q01844|EWS_HUMAN RNA-binding protein EWS |Homo sapiens	-0.485133
>ENSEMBL:ENSBTAP00000024146 (Bos taurus) similar to alpha-2-macroglobulin isoform 1	-0.48562
>Q16186|ADRM1_HUMAN Proteasomal ubiquitin receptor ADRM1 |Homo sapiens	-0.485986
>Q9ULG1|INO80_HUMAN DNA helicase INO80 |Homo sapiens	-0.486067
>Q9GZN1|ARP6_HUMAN Actin-related protein 6 |Homo sapiens	-0.486142
>Q9H633|RPP21_HUMAN Ribonuclease P protein subunit p21 |Homo sapiens	-0.486608
>Q6P2Q9|PRP8_HUMAN Pre-mRNA-processing-splicing factor 8 |Homo sapiens	-0.487273
>ENSEMBL:ENSBTAP00000016242 (Bos taurus) similar to alpha-tubulin I isoform 1;>P68363|TBA1B_HUMAN Tubulin alpha-1B chain |Homo sapiens;>Q71U36|TBA1A_HUMAN Tubulin alpha-1A chain |Homo sapiens;>Q13748|TBA3C_HUMAN Tubulin alpha-3C/D chain |Homo sapiens;>Q6PE	-0.489211
>Q13535|ATR_HUMAN Serine/threonine-protein kinase ATR |Homo sapiens	-0.489656
>Q92600|RCD1_HUMAN Cell differentiation protein RCD1 homolog |Homo sapiens	-0.48973
>Q9Y2I7|FYV1_HUMAN 1-phosphatidylinositol-3-phosphate 5-kinase |Homo sapiens	-0.490301
>O95059|RPP14_HUMAN Ribonuclease P protein subunit p14 |Homo sapiens	-0.490836
>P22083|FUT4_HUMAN Alpha-(1,3)-fucosyltransferase |Homo sapiens	-0.490919
>Q7Z5P9|MUC19_HUMAN Mucin-19 |Homo sapiens	-0.491182
>Q9NUQ6|SPS2L_HUMAN SPATS2-like protein |Homo sapiens	-0.491368
>P62333|PRS10_HUMAN 26S protease regulatory subunit 10B |Homo sapiens	-0.491993
>A7E2V4|K0913_HUMAN Zinc finger SWIM domain-containing protein KIAA0913 |Homo sapiens	-0.492489
>P31943|HNRH1_HUMAN Heterogeneous nuclear ribonucleoprotein H |Homo sapiens;>P52597|HNRPF_HUMAN Heterogeneous nuclear ribonucleoprotein F |Homo sapiens	-0.492779
>O95707|RPP29_HUMAN Ribonuclease P protein subunit p29 |Homo sapiens	-0.492833
>Q13148|TADBP_HUMAN TAR DNA-binding protein 43 |Homo sapiens	-0.493287
>Q9BTE1|DCTN5_HUMAN Dynactin subunit 5 |Homo sapiens	-0.493611
>P78346|RPP30_HUMAN Ribonuclease P protein subunit p30 |Homo sapiens	-0.495786
>Q8TBC3|SHKB1_HUMAN SH3KBP1-binding protein 1 |Homo sapiens	-0.496198
>Q99832|TCPH_HUMAN T-complex protein 1 subunit eta |Homo sapiens	-0.496695
>Q99613|EIF3C_HUMAN Eukaryotic translation initiation factor 3 subunit C |Homo sapiens	-0.49671
>P14868|SYDC_HUMAN Aspartate--tRNA ligase, cytoplasmic |Homo sapiens	-0.496882
>Q13555|KCC2G_HUMAN Calcium/calmodulin-dependent protein kinase type II subunit gamma |Homo sapiens	-0.497376
>O96019|ACL6A_HUMAN Actin-like protein 6A |Homo sapiens;>O94805|ACL6B_HUMAN Actin-like protein 6B |Homo sapiens	-0.498557
>Q15029|U5S1_HUMAN 116 kDa U5 small nuclear ribonucleoprotein component |Homo sapiens	-0.498734
>P35998|PRS7_HUMAN 26S protease regulatory subunit 7 |Homo sapiens	-0.498966
>Q8WXE1|ATRIP_HUMAN ATR-interacting protein |Homo sapiens	-0.499647
>O75832|PSD10_HUMAN 26S proteasome non-ATPase regulatory subunit 10 |Homo sapiens	-0.499684
>Q6IME9 TREMBL:Q6IME9 Tax_Id=10090 Gene_Symbol=Krt72 Type-II keratin Kb35	-0.499705
>O60493|SNX3_HUMAN Sorting nexin-3 |Homo sapiens	-0.500163
>P05388|RLA0_HUMAN 60S acidic ribosomal protein P0 |Homo sapiens;>Q8NHW5|RLA0L_HUMAN 60S acidic ribosomal protein P0-like |Homo sapiens	-0.500695
>Q9H9A5|CNOTA_HUMAN CCR4-NOT transcription complex subunit 10 |Homo sapiens	-0.500767
>O75575|RPC9_HUMAN DNA-directed RNA polymerase III subunit RPC9 |Homo sapiens	-0.501617
>Q9H9T3|ELP3_HUMAN Elongator complex protein 3 |Homo sapiens	-0.502781
>Q7L2H7|EIF3M_HUMAN Eukaryotic translation initiation factor 3 subunit M |Homo sapiens	-0.502821
>Q9BVA1|TBB2B_HUMAN Tubulin beta-2B chain |Homo sapiens;>Q13885|TBB2A_HUMAN Tubulin beta-2A chain |Homo sapiens;>Q9BUF5|TBB6_HUMAN Tubulin beta-6 chain |Homo sapiens	-0.50289
>Q13557|KCC2D_HUMAN Calcium/calmodulin-dependent protein kinase type II subunit delta |Homo sapiens;>Q13555|KCC2G_HUMAN Calcium/calmodulin-dependent protein kinase type II subunit gamma |Homo sapiens;>Q13554|KCC2B_HUMAN Calcium/calmodulin-dependent protein	-0.50304
>Q92804|RBP56_HUMAN TATA-binding protein-associated factor 2N |Homo sapiens	-0.503813
>P07437|TBB5_HUMAN Tubulin beta chain |Homo sapiens;>P68371|TBB4B_HUMAN Tubulin beta-4B chain |Homo sapiens;>Q9BVA1|TBB2B_HUMAN Tubulin beta-2B chain |Homo sapiens;>Q13885|TBB2A_HUMAN Tubulin beta-2A chain |Homo sapiens;>P04350|TBB4A_HUMAN Tubulin beta-4A	-0.503816
>P68371|TBB4B_HUMAN Tubulin beta-4B chain |Homo sapiens;>P04350|TBB4A_HUMAN Tubulin beta-4A chain |Homo sapiens	-0.504052
>P04637|P53_HUMAN Cellular tumor antigen p53 |Homo sapiens	-0.504099
>O43257|ZNHI1_HUMAN Zinc finger HIT domain-containing protein 1 |Homo sapiens	-0.505082
>Q15751|HERC1_HUMAN Probable E3 ubiquitin-protein ligase HERC1 |Homo sapiens	-0.505678
>P47755|CAZA2_HUMAN F-actin-capping protein subunit alpha-2 |Homo sapiens	-0.506624
>Q9NZI8|IF2B1_HUMAN Insulin-like growth factor 2 mRNA-binding protein 1 |Homo sapiens	-0.506741
>ENSEMBL:ENSBTAP00000016242 (Bos taurus) similar to alpha-tubulin I isoform 1;>P68363|TBA1B_HUMAN Tubulin alpha-1B chain |Homo sapiens;>P68366|TBA4A_HUMAN Tubulin alpha-4A chain |Homo sapiens;>Q71U36|TBA1A_HUMAN Tubulin alpha-1A chain |Homo sapiens;>Q13748	-0.507358
>Q4VC05|BCL7A_HUMAN B-cell CLL/lymphoma 7 protein family member A |Homo sapiens;>Q9BQE9|BCL7B_HUMAN B-cell CLL/lymphoma 7 protein family member B |Homo sapiens	-0.5075
>Q9Y262|EIF3L_HUMAN Eukaryotic translation initiation factor 3 subunit L |Homo sapiens	-0.507859
>P54136|SYRC_HUMAN Arginine--tRNA ligase, cytoplasmic |Homo sapiens	-0.507879
>Q32NC0|CR021_HUMAN UPF0711 protein C18orf21 |Homo sapiens	-0.508072
>Q9UKZ1|CB029_HUMAN UPF0760 protein C2orf29 |Homo sapiens	-0.50815
>P13645 SWISS-PROT:P13645 Tax_Id=9606 Gene_Symbol=KRT10 Keratin, type I cytoskeletal 10;>P13645|K1C10_HUMAN Keratin, type I cytoskeletal 10 |Homo sapiens;>Q7Z3Y7 SWISS-PROT:Q7Z3Y7 Tax_Id=9606 Gene_Symbol=KRT28 Keratin 25D;>Q148H6 TREMBL:Q148H6 (Bos taurus)	-0.51007
>P13693|TCTP_HUMAN Translationally-controlled tumor protein |Homo sapiens	-0.511238
>Q8N726|CD2A2_HUMAN Cyclin-dependent kinase inhibitor 2A, isoform 4 |Homo sapiens	-0.511322
>P43686|PRS6B_HUMAN 26S protease regulatory subunit 6B |Homo sapiens	-0.511764
>Q9UKQ2|ADA28_HUMAN Disintegrin and metalloproteinase domain-containing protein 28 |Homo sapiens	-0.512936
>Q4VC05|BCL7A_HUMAN B-cell CLL/lymphoma 7 protein family member A |Homo sapiens	-0.51307
>P13645 SWISS-PROT:P13645 Tax_Id=9606 Gene_Symbol=KRT10 Keratin, type I cytoskeletal 10;>P13645|K1C10_HUMAN Keratin, type I cytoskeletal 10 |Homo sapiens;>P02535-1 SWISS-PROT:P02535-1 Tax_Id=10090 Gene_Symbol=Krt10 Isoform 1 of Keratin, type I cytoskeletal	-0.513174
>O60907|TBL1X_HUMAN F-box-like/WD repeat-containing protein TBL1X |Homo sapiens;>Q9BQ87|TBL1Y_HUMAN F-box-like/WD repeat-containing protein TBL1Y |Homo sapiens	-0.513248
>P15104|GLNA_HUMAN Glutamine synthetase |Homo sapiens	-0.51379
>P51665|PSD7_HUMAN 26S proteasome non-ATPase regulatory subunit 7 |Homo sapiens	-0.514082
>Q15185|TEBP_HUMAN Prostaglandin E synthase 3 |Homo sapiens	-0.514767
>Q9BVA1|TBB2B_HUMAN Tubulin beta-2B chain |Homo sapiens;>Q13885|TBB2A_HUMAN Tubulin beta-2A chain |Homo sapiens	-0.515441
>Q9BYZ8|REG4_HUMAN Regenerating islet-derived protein 4 |Homo sapiens	-0.515574
>P35908|K22E_HUMAN Keratin, type II cytoskeletal 2 epidermal |Homo sapiens;>P35908 SWISS-PROT:P35908 Tax_Id=9606 Gene_Symbol=KRT2 Keratin, type II cytoskeletal 2 epidermal	-0.516007
>Q9Y312|CT004_HUMAN Uncharacterized protein C20orf4 |Homo sapiens	-0.516549
>Q9ULM3|YETS2_HUMAN YEATS domain-containing protein 2 |Homo sapiens	-0.516783
>P62195|PRS8_HUMAN 26S protease regulatory subunit 8 |Homo sapiens	-0.518169
>P00761 SWISS-PROT:P00761|TRYP_PIG Trypsin - Sus scrofa (Pig).	-0.518273
>Q07866|KLC1_HUMAN Kinesin light chain 1 |Homo sapiens;>Q9H0B6|KLC2_HUMAN Kinesin light chain 2 |Homo sapiens	-0.518629
>Q96EP5|DAZP1_HUMAN DAZ-associated protein 1 |Homo sapiens	-0.51888
>ENSEMBL:ENSBTAP00000016242 (Bos taurus) similar to alpha-tubulin I isoform 1;>P68363|TBA1B_HUMAN Tubulin alpha-1B chain |Homo sapiens;>P68366|TBA4A_HUMAN Tubulin alpha-4A chain |Homo sapiens;>Q71U36|TBA1A_HUMAN Tubulin alpha-1A chain |Homo sapiens;>Q13748	-0.519115
>P62191|PRS4_HUMAN 26S protease regulatory subunit 4 |Homo sapiens	-0.51951
>Q15906|VPS72_HUMAN Vacuolar protein sorting-associated protein 72 homolog |Homo sapiens	-0.519983
>P35908|K22E_HUMAN Keratin, type II cytoskeletal 2 epidermal |Homo sapiens;>P35908 SWISS-PROT:P35908 Tax_Id=9606 Gene_Symbol=KRT2 Keratin, type II cytoskeletal 2 epidermal;>Q7Z794 SWISS-PROT:Q7Z794 Tax_Id=9606 Gene_Symbol=KRT77 Keratin 77;>Q7Z794|K2C1B_HUM	-0.520249
>P17987|TCPA_HUMAN T-complex protein 1 subunit alpha |Homo sapiens	-0.52082
>P47756|CAPZB_HUMAN F-actin-capping protein subunit beta |Homo sapiens	-0.521253
>Q15428|SF3A2_HUMAN Splicing factor 3A subunit 2 |Homo sapiens	-0.523299
>Q15532|SSXT_HUMAN Protein SSXT |Homo sapiens	-0.523896
>Q5VU43|MYOME_HUMAN Myomegalin |Homo sapiens	-0.523991
>P35527|K1C9_HUMAN Keratin, type I cytoskeletal 9 |Homo sapiens	-0.524097
>P17980|PRS6A_HUMAN 26S protease regulatory subunit 6A |Homo sapiens	-0.525031
>P04792|HSPB1_HUMAN Heat shock protein beta-1 |Homo sapiens	-0.525248
>Q16514|TAF12_HUMAN Transcription initiation factor TFIID subunit 12 |Homo sapiens	-0.525303
>Q8WUZ0|BCL7C_HUMAN B-cell CLL/lymphoma 7 protein family member C |Homo sapiens	-0.525575
>P61081|UBC12_HUMAN NEDD8-conjugating enzyme Ubc12 |Homo sapiens	-0.526494
>Q8N1G4|LRC47_HUMAN Leucine-rich repeat-containing protein 47 |Homo sapiens	-0.526919
>Q9NYF8|BCLF1_HUMAN Bcl-2-associated transcription factor 1 |Homo sapiens	-0.527203
>Q86YZ3 SWISS-PROT:Q86YZ3 Tax_Id=9606 Gene_Symbol=HRNR Hornerin;>Q86YZ3|HORN_HUMAN Hornerin |Homo sapiens	-0.528015
>Q9HCC0|MCCB_HUMAN Methylcrotonoyl-CoA carboxylase beta chain, mitochondrial |Homo sapiens	-0.528178
>Q92925|SMRD2_HUMAN SWI/SNF-related matrix-associated actin-dependent regulator of chromatin subfamily D member 2 |Homo sapiens	-0.52932
>P78371|TCPB_HUMAN T-complex protein 1 subunit beta |Homo sapiens	-0.529422
>P49368|TCPG_HUMAN T-complex protein 1 subunit gamma |Homo sapiens	-0.529472
>Q9HBM6|TAF9B_HUMAN Transcription initiation factor TFIID subunit 9B |Homo sapiens	-0.529996
>Q99996|AKAP9_HUMAN A-kinase anchor protein 9 |Homo sapiens	-0.530662
>Q15543|TAF13_HUMAN Transcription initiation factor TFIID subunit 13 |Homo sapiens	-0.531013
>O75935|DCTN3_HUMAN Dynactin subunit 3 |Homo sapiens	-0.531325
>P61163|ACTZ_HUMAN Alpha-centractin |Homo sapiens	-0.53227
>P48643|TCPE_HUMAN T-complex protein 1 subunit epsilon |Homo sapiens	-0.533662
>Q16594|TAF9_HUMAN Transcription initiation factor TFIID subunit 9 |Homo sapiens	-0.53394
>P42166|LAP2A_HUMAN Lamina-associated polypeptide 2, isoform alpha |Homo sapiens	-0.534291
>Q9Y535|RPC8_HUMAN DNA-directed RNA polymerase III subunit RPC8 |Homo sapiens	-0.534827
>Q13557|KCC2D_HUMAN Calcium/calmodulin-dependent protein kinase type II subunit delta |Homo sapiens;>Q9UQM7|KCC2A_HUMAN Calcium/calmodulin-dependent protein kinase type II subunit alpha |Homo sapiens;>Q13555|KCC2G_HUMAN Calcium/calmodulin-dependent protein	-0.535477
>P13861|KAP2_HUMAN cAMP-dependent protein kinase type II-alpha regulatory subunit |Homo sapiens;>P31323|KAP3_HUMAN cAMP-dependent protein kinase type II-beta regulatory subunit |Homo sapiens	-0.53621
>Q8N163|K1967_HUMAN Protein KIAA1967 |Homo sapiens	-0.536679
>O75817|POP7_HUMAN Ribonuclease P protein subunit p20 |Homo sapiens	-0.536799
>Q9Y2Y1|RPC10_HUMAN DNA-directed RNA polymerase III subunit RPC10 |Homo sapiens	-0.537381
>O14802|RPC1_HUMAN DNA-directed RNA polymerase III subunit RPC1 |Homo sapiens	-0.537402
>O43707|ACTN4_HUMAN Alpha-actinin-4 |Homo sapiens;>P35609|ACTN2_HUMAN Alpha-actinin-2 |Homo sapiens	-0.537801
>Q08AM6|VAC14_HUMAN Protein VAC14 homolog |Homo sapiens	-0.53836
>P61163|ACTZ_HUMAN Alpha-centractin |Homo sapiens;>P42025|ACTY_HUMAN Beta-centractin |Homo sapiens	-0.538448
>Q9NVU0|RPC5_HUMAN DNA-directed RNA polymerase III subunit RPC5 |Homo sapiens	-0.538889
>P42025|ACTY_HUMAN Beta-centractin |Homo sapiens	-0.539106
>Q9NW08|RPC2_HUMAN DNA-directed RNA polymerase III subunit RPC2 |Homo sapiens	-0.539256
>Q969G3|SMCE1_HUMAN SWI/SNF-related matrix-associated actin-dependent regulator of chromatin subfamily E member 1 |Homo sapiens	-0.539282
>P05423|RPC4_HUMAN DNA-directed RNA polymerase III subunit RPC4 |Homo sapiens	-0.539398
>ENSEMBL:ENSBTAP00000016242 (Bos taurus) similar to alpha-tubulin I isoform 1;>P68363|TBA1B_HUMAN Tubulin alpha-1B chain |Homo sapiens;>P68366|TBA4A_HUMAN Tubulin alpha-4A chain |Homo sapiens;>Q9H853|TBA4B_HUMAN Putative tubulin-like protein alpha-4B |Homo	-0.539689
>Q14203|DCTN1_HUMAN Dynactin subunit 1 |Homo sapiens	-0.540705
>P08670|VIME_HUMAN Vimentin |Homo sapiens	-0.541623
>Q9BUQ8|DDX23_HUMAN Probable ATP-dependent RNA helicase DDX23 |Homo sapiens	-0.542012
>Q8IYT4|KATL2_HUMAN Katanin p60 ATPase-containing subunit A-like 2 |Homo sapiens	-0.542542
>Q9ULX6|AKP8L_HUMAN A-kinase anchor protein 8-like |Homo sapiens	-0.542893
>Q9C086|IN80B_HUMAN INO80 complex subunit B |Homo sapiens	-0.544043
>Q9UBB4|ATX10_HUMAN Ataxin-10 |Homo sapiens	-0.544336
>P55036|PSMD4_HUMAN 26S proteasome non-ATPase regulatory subunit 4 |Homo sapiens	-0.547221
>ENSEMBL:ENSBTAP00000016242 (Bos taurus) similar to alpha-tubulin I isoform 1;>P68363|TBA1B_HUMAN Tubulin alpha-1B chain |Homo sapiens;>P68366|TBA4A_HUMAN Tubulin alpha-4A chain |Homo sapiens;>A6NHL2|TBAL3_HUMAN Tubulin alpha chain-like 3 |Homo sapiens;>Q7	-0.54911
>P07437|TBB5_HUMAN Tubulin beta chain |Homo sapiens;>Q9BVA1|TBB2B_HUMAN Tubulin beta-2B chain |Homo sapiens;>Q13885|TBB2A_HUMAN Tubulin beta-2A chain |Homo sapiens	-0.54952
>Q5VWG9|TAF3_HUMAN Transcription initiation factor TFIID subunit 3 |Homo sapiens	-0.550081
>P51532|SMCA4_HUMAN Transcription activator BRG1 |Homo sapiens	-0.550254
>O00268|TAF4_HUMAN Transcription initiation factor TFIID subunit 4 |Homo sapiens	-0.550303
>Q16637|SMN_HUMAN Survival motor neuron protein |Homo sapiens	-0.551005
>P68371|TBB4B_HUMAN Tubulin beta-4B chain |Homo sapiens;>Q9BVA1|TBB2B_HUMAN Tubulin beta-2B chain |Homo sapiens;>Q13885|TBB2A_HUMAN Tubulin beta-2A chain |Homo sapiens	-0.552036
>Q9NZ32|ARP10_HUMAN Actin-related protein 10 |Homo sapiens	-0.552539
>Q9H9F9|ARP5_HUMAN Actin-related protein 5 |Homo sapiens	-0.552958
>ENSEMBL:ENSBTAP00000016242 (Bos taurus) similar to alpha-tubulin I isoform 1;>P68363|TBA1B_HUMAN Tubulin alpha-1B chain |Homo sapiens;>Q71U36|TBA1A_HUMAN Tubulin alpha-1A chain |Homo sapiens;>Q9BQE3|TBA1C_HUMAN Tubulin alpha-1C chain |Homo sapiens	-0.55331
>P0C0S5|H2AZ_HUMAN Histone H2A.Z |Homo sapiens;>Q71UI9|H2AV_HUMAN Histone H2A.V |Homo sapiens	-0.553409
>Q6PI98|IN80C_HUMAN INO80 complex subunit C |Homo sapiens	-0.553771
>Q6P4R8|NFRKB_HUMAN Nuclear factor related to kappa-B-binding protein |Homo sapiens	-0.553896
>O75792|RNH2A_HUMAN Ribonuclease H2 subunit A |Homo sapiens	-0.554363
>P78345|RPP38_HUMAN Ribonuclease P protein subunit p38 |Homo sapiens	-0.556524
>P07437|TBB5_HUMAN Tubulin beta chain |Homo sapiens;>P68371|TBB4B_HUMAN Tubulin beta-4B chain |Homo sapiens;>P04350|TBB4A_HUMAN Tubulin beta-4A chain |Homo sapiens	-0.556893
>Q9NPF5|DMAP1_HUMAN DNA methyltransferase 1-associated protein 1 |Homo sapiens	-0.558364
>Q3KQU3|MA7D1_HUMAN MAP7 domain-containing protein 1 |Homo sapiens	-0.559306
>Q8N5L8|CI023_HUMAN Alba-like protein C9orf23 |Homo sapiens	-0.560908
>Q9H6R7|CB044_HUMAN WD repeat-containing protein C2orf44 |Homo sapiens	-0.561992
>P09429|HMGB1_HUMAN High mobility group protein B1 |Homo sapiens;>P26583|HMGB2_HUMAN High mobility group protein B2 |Homo sapiens	-0.562132
>Q8TAQ2|SMRC2_HUMAN SWI/SNF complex subunit SMARCC2 |Homo sapiens;>Q92922|SMRC1_HUMAN SWI/SNF complex subunit SMARCC1 |Homo sapiens	-0.562773
>Q13561|DCTN2_HUMAN Dynactin subunit 2 |Homo sapiens	-0.563804
>O75528|TADA3_HUMAN Transcriptional adapter 3 |Homo sapiens	-0.563903
>Q12904|AIMP1_HUMAN Aminoacyl tRNA synthase complex-interacting multifunctional protein 1 |Homo sapiens	-0.56454
>O14497|ARI1A_HUMAN AT-rich interactive domain-containing protein 1A |Homo sapiens	-0.564757
>P13645 SWISS-PROT:P13645 Tax_Id=9606 Gene_Symbol=KRT10 Keratin, type I cytoskeletal 10;>P13645|K1C10_HUMAN Keratin, type I cytoskeletal 10 |Homo sapiens	-0.564912
>Q9Y5U2|TSSC4_HUMAN Protein TSSC4 |Homo sapiens	-0.565377
>P49848|TAF6_HUMAN Transcription initiation factor TFIID subunit 6 |Homo sapiens	-0.565802
>Q6SZW1|SARM1_HUMAN Sterile alpha and TIR motif-containing protein 1 |Homo sapiens	-0.565946
>P13861|KAP2_HUMAN cAMP-dependent protein kinase type II-alpha regulatory subunit |Homo sapiens	-0.566075
>Q9H1D9|RPC6_HUMAN DNA-directed RNA polymerase III subunit RPC6 |Homo sapiens	-0.566952
>Q92785|REQU_HUMAN Zinc finger protein ubi-d4 |Homo sapiens	-0.567065
>P13645 SWISS-PROT:P13645 Tax_Id=9606 Gene_Symbol=KRT10 Keratin, type I cytoskeletal 10;>P13645|K1C10_HUMAN Keratin, type I cytoskeletal 10 |Homo sapiens;>P02535-1 SWISS-PROT:P02535-1 Tax_Id=10090 Gene_Symbol=Krt10 Isoform 1 of Keratin, type I cytoskeletal	-0.568384
>P13645 SWISS-PROT:P13645 Tax_Id=9606 Gene_Symbol=KRT10 Keratin, type I cytoskeletal 10;>P13645|K1C10_HUMAN Keratin, type I cytoskeletal 10 |Homo sapiens;>P02535-1 SWISS-PROT:P02535-1 Tax_Id=10090 Gene_Symbol=Krt10 Isoform 1 of Keratin, type I cytoskeletal	-0.568477
>Q9BW61|DDA1_HUMAN DET1- and DDB1-associated protein 1 |Homo sapiens	-0.56868
>O95785|WIZ_HUMAN Protein Wiz |Homo sapiens	-0.568951
>Q92784|DPF3_HUMAN Zinc finger protein DPF3 |Homo sapiens;>Q8WYB5|KAT6B_HUMAN Histone acetyltransferase KAT6B |Homo sapiens;>Q92794|KAT6A_HUMAN Histone acetyltransferase KAT6A |Homo sapiens;>Q92782|DPF1_HUMAN Zinc finger protein neuro-d4 |Homo sapiens;>Q92	-0.569165
>Q9Y4B6|VPRBP_HUMAN Protein VPRBP |Homo sapiens	-0.569442
>P55072|TERA_HUMAN Transitional endoplasmic reticulum ATPase |Homo sapiens	-0.569982
>Q96GM5|SMRD1_HUMAN SWI/SNF-related matrix-associated actin-dependent regulator of chromatin subfamily D member 1 |Homo sapiens	-0.569984
>Q56P03|EAPP_HUMAN E2F-associated phosphoprotein |Homo sapiens	-0.570901
>P62937|PPIA_HUMAN Peptidyl-prolyl cis-trans isomerase A |Homo sapiens;>Q9Y536|PAL4A_HUMAN Peptidyl-prolyl cis-trans isomerase A-like 4A/B/C |Homo sapiens	-0.571316
>P37802|TAGL2_HUMAN Transgelin-2 |Homo sapiens	-0.571842
>P52907|CAZA1_HUMAN F-actin-capping protein subunit alpha-1 |Homo sapiens	-0.572388
>O14497|ARI1A_HUMAN AT-rich interactive domain-containing protein 1A |Homo sapiens;>Q8NFD5|ARI1B_HUMAN AT-rich interactive domain-containing protein 1B |Homo sapiens	-0.573185
>Q9Y4L5|RN115_HUMAN E3 ubiquitin-protein ligase RNF115 |Homo sapiens	-0.573313
>Q9UJW0|DCTN4_HUMAN Dynactin subunit 4 |Homo sapiens	-0.573373
>Q12824|SNF5_HUMAN SWI/SNF-related matrix-associated actin-dependent regulator of chromatin subfamily B member 1 |Homo sapiens	-0.573385
>P27797|CALR_HUMAN Calreticulin |Homo sapiens	-0.573736
>P63173|RL38_HUMAN 60S ribosomal protein L38 |Homo sapiens	-0.573827
>Q13765|NACA_HUMAN Nascent polypeptide-associated complex subunit alpha |Homo sapiens	-0.574241
>O96019|ACL6A_HUMAN Actin-like protein 6A |Homo sapiens	-0.574558
>P98179|RBM3_HUMAN Putative RNA-binding protein 3 |Homo sapiens	-0.575671
>P07437|TBB5_HUMAN Tubulin beta chain |Homo sapiens;>P68371|TBB4B_HUMAN Tubulin beta-4B chain |Homo sapiens;>Q9BVA1|TBB2B_HUMAN Tubulin beta-2B chain |Homo sapiens;>Q13885|TBB2A_HUMAN Tubulin beta-2A chain |Homo sapiens	-0.57753
>Q8IYH5|ZZZ3_HUMAN ZZ-type zinc finger-containing protein 3 |Homo sapiens	-0.577973
>Q5JTN6|WDR38_HUMAN WD repeat-containing protein 38 |Homo sapiens	-0.578774
>Q8NFD5|ARI1B_HUMAN AT-rich interactive domain-containing protein 1B |Homo sapiens	-0.578847
>P05386|RLA1_HUMAN 60S acidic ribosomal protein P1 |Homo sapiens	-0.580581
>Q8IWC1|MA7D3_HUMAN MAP7 domain-containing protein 3 |Homo sapiens	-0.581425
>Q14687|GSE1_HUMAN Genetic suppressor element 1 |Homo sapiens	-0.582143
>Q15366|PCBP2_HUMAN Poly(rC)-binding protein 2 |Homo sapiens;>P57721|PCBP3_HUMAN Poly(rC)-binding protein 3 |Homo sapiens	-0.586386
>O14950|ML12B_HUMAN Myosin regulatory light chain 12B |Homo sapiens;>P19105|ML12A_HUMAN Myosin regulatory light chain 12A |Homo sapiens	-0.588323
>P51970|NDUA8_HUMAN NADH dehydrogenase [ubiquinone] 1 alpha subcomplex subunit 8 |Homo sapiens	-0.588725
>P10515|ODP2_HUMAN Dihydrolipoyllysine-residue acetyltransferase component of pyruvate dehydrogenase complex, mitochondrial |Homo sapiens	-0.588926
>Q3ZCM7|TBB8_HUMAN Tubulin beta-8 chain |Homo sapiens;>A6NNZ2|TBB8B_HUMAN Tubulin beta-8 chain B |Homo sapiens;>P07437|TBB5_HUMAN Tubulin beta chain |Homo sapiens;>P68371|TBB4B_HUMAN Tubulin beta-4B chain |Homo sapiens;>Q9BVA1|TBB2B_HUMAN Tubulin beta-2B c	-0.589627
>Q9NS73|MBIP1_HUMAN MAP3K12-binding inhibitory protein 1 |Homo sapiens	-0.589706
>P13645 SWISS-PROT:P13645 Tax_Id=9606 Gene_Symbol=KRT10 Keratin, type I cytoskeletal 10;>P13645|K1C10_HUMAN Keratin, type I cytoskeletal 10 |Homo sapiens;>P08730-1 SWISS-PROT:P08730-1 Tax_Id=10090 Gene_Symbol=Krt13 Isoform 1 of Keratin, type I cytoskeletal	-0.590889
>Q9Y5A9|YTHD2_HUMAN YTH domain family protein 2 |Homo sapiens	-0.594658
>Q9BUL9|RPP25_HUMAN Ribonuclease P protein subunit p25 |Homo sapiens	-0.59553
>Q8TAQ2|SMRC2_HUMAN SWI/SNF complex subunit SMARCC2 |Homo sapiens	-0.597003
>Q9Y597|KCTD3_HUMAN BTB/POZ domain-containing protein KCTD3 |Homo sapiens;>Q8TBC3|SHKB1_HUMAN SH3KBP1-binding protein 1 |Homo sapiens	-0.597097
>P51532|SMCA4_HUMAN Transcription activator BRG1 |Homo sapiens;>P51531|SMCA2_HUMAN Probable global transcription activator SNF2L2 |Homo sapiens	-0.59998
>P60712 SWISS-PROT:P60712 (Bos taurus) Actin, cytoplasmic 1;>P60709|ACTB_HUMAN Actin, cytoplasmic 1 |Homo sapiens;>Q6S8J3|POTEE_HUMAN POTE ankyrin domain family member E |Homo sapiens;>A5A3E0|POTEF_HUMAN POTE ankyrin domain family member F |Homo sapiens;>P	-0.600479
>Q3ZCM7|TBB8_HUMAN Tubulin beta-8 chain |Homo sapiens;>A6NNZ2|TBB8B_HUMAN Tubulin beta-8 chain B |Homo sapiens;>A6NKZ8|YI016_HUMAN Putative tubulin beta chain-like protein ENSP00000290377 |Homo sapiens;>P07437|TBB5_HUMAN Tubulin beta chain |Homo sapiens;>P	-0.601112
>O95816|BAG2_HUMAN BAG family molecular chaperone regulator 2 |Homo sapiens	-0.601688
>O75175|CNOT3_HUMAN CCR4-NOT transcription complex subunit 3 |Homo sapiens	-0.60229
>Q92922|SMRC1_HUMAN SWI/SNF complex subunit SMARCC1 |Homo sapiens	-0.602785
>P62937|PPIA_HUMAN Peptidyl-prolyl cis-trans isomerase A |Homo sapiens	-0.604239
>ENSEMBL:ENSBTAP00000016242 (Bos taurus) similar to alpha-tubulin I isoform 1;>P68363|TBA1B_HUMAN Tubulin alpha-1B chain |Homo sapiens;>Q71U36|TBA1A_HUMAN Tubulin alpha-1A chain |Homo sapiens;>Q13748|TBA3C_HUMAN Tubulin alpha-3C/D chain |Homo sapiens;>Q9BQ	-0.606574
>P09936|UCHL1_HUMAN Ubiquitin carboxyl-terminal hydrolase isozyme L1 |Homo sapiens	-0.608273
>Q9BUI4|RPC3_HUMAN DNA-directed RNA polymerase III subunit RPC3 |Homo sapiens	-0.610218
>P60712 SWISS-PROT:P60712 (Bos taurus) Actin, cytoplasmic 1;>P60709|ACTB_HUMAN Actin, cytoplasmic 1 |Homo sapiens;>Q6S8J3|POTEE_HUMAN POTE ankyrin domain family member E |Homo sapiens;>A5A3E0|POTEF_HUMAN POTE ankyrin domain family member F |Homo sapiens;>P	-0.610273
>O75177|CREST_HUMAN Calcium-responsive transactivator |Homo sapiens	-0.613198
>P62829|RL23_HUMAN 60S ribosomal protein L23 |Homo sapiens	-0.613449
>ENSEMBL:ENSBTAP00000016242 (Bos taurus) similar to alpha-tubulin I isoform 1;>P68363|TBA1B_HUMAN Tubulin alpha-1B chain |Homo sapiens;>P68366|TBA4A_HUMAN Tubulin alpha-4A chain |Homo sapiens;>A6NHL2|TBAL3_HUMAN Tubulin alpha chain-like 3 |Homo sapiens;>Q7	-0.614656
>P07437|TBB5_HUMAN Tubulin beta chain |Homo sapiens;>P68371|TBB4B_HUMAN Tubulin beta-4B chain |Homo sapiens	-0.614732
>Q3ZCM7|TBB8_HUMAN Tubulin beta-8 chain |Homo sapiens;>P68371|TBB4B_HUMAN Tubulin beta-4B chain |Homo sapiens;>P04350|TBB4A_HUMAN Tubulin beta-4A chain |Homo sapiens	-0.617722
>Q3ZCM7|TBB8_HUMAN Tubulin beta-8 chain |Homo sapiens	-0.621764
>P55036|PSMD4_HUMAN 26S proteasome non-ATPase regulatory subunit 4 |Homo sapiens;>A2A3N6|PIPSL_HUMAN Putative PIP5K1A and PSMD4-like protein |Homo sapiens	-0.627669
>P82650|RT22_HUMAN 28S ribosomal protein S22, mitochondrial |Homo sapiens	-0.628381
>P04350|TBB4A_HUMAN Tubulin beta-4A chain |Homo sapiens;>Q9BUF5|TBB6_HUMAN Tubulin beta-6 chain |Homo sapiens	-0.629812
>P38919|IF4A3_HUMAN Eukaryotic initiation factor 4A-III |Homo sapiens	-0.631246
>Q9H583|HEAT1_HUMAN HEAT repeat-containing protein 1 |Homo sapiens	-0.631284
>P42166|LAP2A_HUMAN Lamina-associated polypeptide 2, isoform alpha |Homo sapiens;>P42167|LAP2B_HUMAN Lamina-associated polypeptide 2, isoforms beta/gamma |Homo sapiens	-0.631908
>Q9H6W3|NO66_HUMAN Lysine-specific demethylase NO66 |Homo sapiens	-0.633885
>Q15528|MED22_HUMAN Mediator of RNA polymerase II transcription subunit 22 |Homo sapiens	-0.6339
>P05114|HMGN1_HUMAN Non-histone chromosomal protein HMG-14 |Homo sapiens	-0.637177
>Q9HB71|CYBP_HUMAN Calcyclin-binding protein |Homo sapiens	-0.638012
>P05204|HMGN2_HUMAN Non-histone chromosomal protein HMG-17 |Homo sapiens;>O00479|HMGN4_HUMAN High mobility group nucleosome-binding domain-containing protein 4 |Homo sapiens	-0.642105
>Q93045|STMN2_HUMAN Stathmin-2 |Homo sapiens;>Q9H169|STMN4_HUMAN Stathmin-4 |Homo sapiens;>P16949|STMN1_HUMAN Stathmin |Homo sapiens	-0.643745
>P07437|TBB5_HUMAN Tubulin beta chain |Homo sapiens;>P68371|TBB4B_HUMAN Tubulin beta-4B chain |Homo sapiens;>Q9BVA1|TBB2B_HUMAN Tubulin beta-2B chain |Homo sapiens;>P04350|TBB4A_HUMAN Tubulin beta-4A chain |Homo sapiens;>Q9BUF5|TBB6_HUMAN Tubulin beta-6 ch	-0.645194
>Q9UQ35|SRRM2_HUMAN Serine/arginine repetitive matrix protein 2 |Homo sapiens	-0.646366
>P11142|HSP7C_HUMAN Heat shock cognate 71 kDa protein |Homo sapiens;>P08107|HSP71_HUMAN Heat shock 70 kDa protein 1A/1B |Homo sapiens	-0.648269
>Q8NBZ0|IN80E_HUMAN INO80 complex subunit E |Homo sapiens	-0.65024
>P09651|ROA1_HUMAN Heterogeneous nuclear ribonucleoprotein A1 |Homo sapiens;>Q32P51|RA1L2_HUMAN Heterogeneous nuclear ribonucleoprotein A1-like 2 |Homo sapiens	-0.654596
>Q14596|NBR1_HUMAN Next to BRCA1 gene 1 protein |Homo sapiens	-0.658018
>Q96DI7|SNR40_HUMAN U5 small nuclear ribonucleoprotein 40 kDa protein |Homo sapiens	-0.658195
>Q12774|ARHG5_HUMAN Rho guanine nucleotide exchange factor 5 |Homo sapiens	-0.659404
>Q6ZRS2|SRCAP_HUMAN Helicase SRCAP |Homo sapiens	-0.659799
>Q58FF8|H90B2_HUMAN Putative heat shock protein HSP 90-beta 2 |Homo sapiens	-0.661757
>P60660|MYL6_HUMAN Myosin light polypeptide 6 |Homo sapiens	-0.665248
>P31323|KAP3_HUMAN cAMP-dependent protein kinase type II-beta regulatory subunit |Homo sapiens	-0.669581
>Q07666|KHDR1_HUMAN KH domain-containing, RNA-binding, signal transduction-associated protein 1 |Homo sapiens;>Q5VWX1|KHDR2_HUMAN KH domain-containing, RNA-binding, signal transduction-associated protein 2 |Homo sapiens	-0.678199
>P47888|OR3A3_HUMAN Olfactory receptor 3A3 |Homo sapiens;>P47893|OR3A2_HUMAN Olfactory receptor 3A2 |Homo sapiens	-0.680343
>Q14257|RCN2_HUMAN Reticulocalbin-2 |Homo sapiens	-0.680662
>P68032|ACTC_HUMAN Actin, alpha cardiac muscle 1 |Homo sapiens;>P68133|ACTS_HUMAN Actin, alpha skeletal muscle |Homo sapiens	-0.681471
>P11940|PABP1_HUMAN Polyadenylate-binding protein 1 |Homo sapiens;>Q9H361|PABP3_HUMAN Polyadenylate-binding protein 3 |Homo sapiens	-0.681505
>P60712 SWISS-PROT:P60712 (Bos taurus) Actin, cytoplasmic 1;>P60709|ACTB_HUMAN Actin, cytoplasmic 1 |Homo sapiens;>P63261|ACTG_HUMAN Actin, cytoplasmic 2 |Homo sapiens;>Q562R1|ACTBL_HUMAN Beta-actin-like protein 2 |Homo sapiens	-0.683362
>Q9UHR4|BI2L1_HUMAN Brain-specific angiogenesis inhibitor 1-associated protein 2-like protein 1 |Homo sapiens	-0.684208
>P60660|MYL6_HUMAN Myosin light polypeptide 6 |Homo sapiens;>P14649|MYL6B_HUMAN Myosin light chain 6B |Homo sapiens	-0.702147
>P35527|K1C9_HUMAN Keratin, type I cytoskeletal 9 |Homo sapiens;>P35527 SWISS-PROT:P35527 Tax_Id=9606 Gene_Symbol=KRT9 Keratin, type I cytoskeletal 9	-0.707433
>Q14498|RBM39_HUMAN RNA-binding protein 39 |Homo sapiens	-0.708661
>Q9UKL0|RCOR1_HUMAN REST corepressor 1 |Homo sapiens	-0.713338
[truncated: 17 more rows]
