# Supplementary material for: Pharmacological dimerization and activation of the exchange factor eIF2B antagonizes the integrated stress response
Source: eLife journal article supplement (doi:10.7554/elife.07314), 2015-04-15
Supplement: supp [file elife_poa_e07314_Figure_1_source_data_1.pdf › elife_poa_e07314_Figure_1_source_data_1.pdf]

gtggaagatacctaaggatcaacagctcctggggatttggggttgcctctggaaaactcatttgcaccactgctgtgccttggatgctagttggagta < 2200

ataaatctctggaacagatttggaatcacacgacctggatggagtgggacagagaaattaacaattacacaagcttaatacactccttaattgaagaatc < 2300

gcaaaaccagcaagaaaagaatgaacaagaattattggaattagataaatgggcaagtttgggaattggttaacataacaaattggctgtggtatata < 2400

aaattattcataatgatagtaggaggcttggtaggttaagaatagtttttgcctgtactttctatagtgaaatagagttaggcagggatattcaccattat < 2500

cgtttcagaccacctccaaccccgaggggacccgacaggccgaaggaatagaagaagaagtgaggagagagacagagacagatccattcgattagt < 2600

gaacggatcggcactgctgcccattctgcagacaaatggcagtatccatccacaattttaaaagaaaagggggattgggggtacagtgcagggga < 2700

aagaatagtagacataatagcaacagacatacaaaactaagaattacaaaaacaaattacaaaaattcaaaattttcgggtttattacaggacagcaga < 2800

gatccagtttggtagtagtaccgggcccgcctctagagatccgacgcccattcttaggccgcccggccccctgcacagacttggggagaagctcggt < 2900

actccccctgccccggttaatttgcataataatatttctagtaactatagaggcttaatgtgcgataaaagacagataatctgttcttttaatactagct < 3000

acattttacatgataggcttggatttctataacttcgtatagcatacattatacgaagttat >LoxP  
|  
aaacagcacaaaaggaaactcaccctaactgtaaagta < 3100

attgtgtgttttgagactataaatatcccttgagaaaaagccttggttaacgcgcggtgaccctcgagtactaggatccattaggcggcgcgtggataac < 3200

cgattaccgcatgcattagttatta**ATAGTAATCAATTACGGGGTCATTAGTTCATAGCCCATATATGGAGTTCGCGTTACATAACTTACGGTAAAT** < 3300

**GGCCCGCTGGCTGACCGCCCAACGACCCCGCCATTGACGTCAATAATGACGTATGTTCCCATAGTAACGCCAATAGGGACTTCCATTGACGTCAAT** < 3400

**GGGTGGAGTATTTACGGTAAACTGCCACTTGGCAGTACATCAAGTGTATCATATGCCAAGTACGCCCCCTATTGACGTCAATGACGGTAAATGGCCCGC** < 3500

**CTGGCATTATGCCAGTACATGACCTTATGGGACTTTCTACTTGGCAGTACATCTACGTATTAGTCATCGCTATTACCATGGTGATGCGGTTTGGCAG** >P-CMV  
|  
< 3600

**TACATCAATGGGCGTGGATAGCGGTTTACTCACGGGGATTCCAAGTCTCCACCCATTGACGTCAATGGGAGTTTGTGTTGGCACCAAATCAACGGG** < 3700

**ACTTCCAAAATGTCGTAACAACCTCCGCCCATGACGCAATGGGCGTAGGCGTGTACGGTGGGAGTCTATATAAGC**AGAGCTGGTTAGTGAACCG < 3800

TCAGATCCGCTAGCGCTACCGGACTCAGATCTCGAGtttctactttgccccccacagatgtagttttctctgctgctgtgctgttttccctcctccccgc < 3900

cctcagggtccacggccaccatggcgtattaggggcagcagtgctgctgcccagcattggcctttgcagcggcggcagcagcaccaggctctgcagcggca >ATF4-UTR  
|  
< 4000

acccccagcggcttaagccatggcgttctcacggcattcagcagcagcgttctgtaaccgacaaagacaccttgaattaagcacattcctcgattcc < 4100

agcaaagcaccgcaac**ATGGTGAGCAAGGGCGAGGAGCTGTTACCGGGGTGGTGCCCATCCTGGTCGAGCTGGACGGCGAGTAAACGGCCACAAGTTC** < 4200

**AGCGTGTCCGGCGAGGGCGAGGGCGATGCCACCTACGGCAAGCTGACCCTGAAGCTGATCTGCACCACCGGCAAGCTGCCCGTGCCCTGGCCACCCTCG** < 4300

**TGACCACCTGGGCTACGGCTGCAGTGCTTCGCCCGCTACCCCGACCACATGAAGCAGCAGCACTTCTCAAGTCCGCCATGCCCGAAGGCTACGTCCA** < 4400

>Venus

GGAGCGCACCATCTTCTTCAAGGACGACGGCAACTACAAGACCCGCGCCGAGGTGAAGTTCGAGGGCGACACCCTGGTGAACCGCATCGAGCTGAAGGGC < 4500

ATCGACTTCAAGGAGGACGGCAACATCCTGGGGCACAAGCTGGAGTACAACACAACAGCCACAACGTCTATATCACCGCCGACAAGCAGAAGAACGGCA < 4600

TCAAGGCCAACTTCAAGATCCGCCACAACATCGAGGACGGCGCGTGCAGCTCGCCGACCATTACCAGCAGAACACCCCATCGGGCAGCGCCCGTGCT < 4700

GCTGCCCGACAACCCTACCTGAGCTACCAGTCCGCCCTGAGCAAAGACCCCAACGAGAAGCGCATCACATGGTCTGCTGGAGTTCGTGACCGCCG < 4800

GGGATCACTCTCGGCATGGACGAGCTGTACAAGTAA|GAATTCCGCCCTCTCCCTCCCCCCCCCTAACGTTACTGGCCGAAGCCGCTTGAATAAGGCC < 4900

GGTGTGCGTTTGTCTATATGTTATTTCCACCATATTGCCGTCTTTTGGCAATGTGAGGGCCGGAAACCTGGCCCTGTCTTCTTGACGAGCATTCTTAG < 5000

GGGTCTTTCCCTCTCGCCAAAGGAATGCAAGGTCTGTTGAATGTCGTGAAGGAAGCAGTTCCTCTGGAAGCTTCTTGAAGACAAACACGTCTGTAGCG < 5100

ACCCTTTGCAGGCAGCGGAACCCCCACCTGGCGACAGGTGCCCTCTGCGGCCAAAAGCCACGTGTATAAGATACACCTGCAAAGGCGGCACAACCCAGT < 5200

>IRES  
|

GCCACGTTGTGAGTTGGATAGTTGTGAAAGAGTCAAATGGCTCTCCTCAAGCGTATTCAACAAGGGGCTGAAGGATGCCCAGAAGGTACCCATTGTAT < 5300

GGGATCTGATCTGGGGCCTCGGTGCACATGCTTTACATGTGTTTAGTCGAGGTTAAAAAACGCTTAGGCCCCCGAACACGGGGACGTGGTTTTCTT < 5400

TGAAAAACACGATGATAATATGGCCACAACCATGAGCGAGCTGATTAAGGAGAACATGCACATGAAGCTGTACATGGAGGGCACCGTGGACAACCATCAC < 5500

TTCAAGTGCACATCCGAGGGCGAAGGCAAGCCCTACGAGGGCACCCAGACCATGAGAATCAAGGTGGTCGAGGGCGGCCCTCTCCCTTCGCCTTCGACA < 5600

TCCTGGCTACTAGCTTCTCTACGGCAGCAAGACCTTACATCAACCACACCCAGGGCATCCCCGACTTCTTCAAGCAGTCCTTCCCTGAGGGCTTCACATG < 5700

GAGAGAGTCAACACATACGAAGACGGGGCGTGTGACCGCTACCCAGGACACCAGCCTCCAGGACGGCTGCCTCATCTACACGTCAAGATCAGAGGG < 5800

>tagBFP  
|

GTGAACTTCAATCCAACGGCCCTGTGATGCAGAAGAAAACACTCGGCTGGGAGGCCCTCACCGAGACGCTGTACCCGCTGACGGCGGCCCTGGAAGGCA < 5900

GAAACGACATGGCCCTGAAGCTCGTGGGCGGGAGCCATCTGATCGCAAAACATCAAGACCACATATAGATCCAAGAAACCCGCTAAGAACCTCAAGATGCC < 6000

TGGCGTCTACTATGTGGACTACAGACTGGAAAGAATCAAGGAGGCCAACAACGAGACCTACGTCGAGCAGCAGAGGTGGCAGTGGCCAGATACTGCGAC < 6100

CTCCCTAGCAAACCTGGGGCACAAGCTTAATTAAGccttaggcGAATTGctcgaggacctaataaacttcgtatagcatacattatacgaagttatacatgt < 6200

ttaagggttccggttccactaggtacaattcgatatcaagcttatcgataatcaacctctggattacaaaatttgtaagattgactgggtattcttaac < 6300

tatgttgctccttttacgctatgtggatagctgctttaatgcctttgtatcatgctattgcttcccgtatggctttcattttctcctccttgataaat < 6400

cctggttgctgtctctttatgaggagttgtggccggtgtcaggcaacgtggcgtggtgtgcaactgtgtttgctgacgcaacccccactggttggggcat < 6500

tgcaccacctgtcagctcctttccgggactttcgctttccccctccctattgccacggcggaactcatcgccgctgccttcccctgctggacaggg < 6600

gctcggctggtggcactgacaattccggtggtgtgtcggggaatcatcgctctttccttgctgctcgctgtgttgccacctggattctgcgcgga < 6700

cgtccttctgctacgtcccttcggccctcaatccagcggaccttccctcccgcggcctgctgcccggctctgcccctctccgcgtcttcgccttcgccc < 6800

tcagacgagtcggatctccctttgggccgctccccgcatcgataccgtcgacctcgatcgagacctagaaaaacatggagcaatcacaagtagcaatac < 6900

agcagctaccaatgctgattgtgcctggctagaagcacaagaggaggaggagggtgggtttccagtcacacctcaggtacctttaagaccaatgacttac < 7000

aaggcagctgtagatcttagccactttttaaaagaaaaggggggactggaagggctaattcactcccaacgaagacaagatatccttgatctgtggatct < 7100

accacacacaaggctacttccctgattggcagaactacacaccagggccagggatcagatatccactgacctttggatgggtgctacaagctagtaccagt < 7200

tgagcaagagaaggtagaagaagccaatgaaggagagaacaccgcttgttacacctgtgagcctgcatgggatggatgaccggagagagaagtatta < 7300

gagtggaggtttgacagccgctagcatttcatcacatggcccagagctgcatccggactgtactgggtctctctgggttagaccagatctgagcctggg < 7400

agctctctggctaactaggaaccactgcttaagcctcaataaagcttgcttgagtgcttcaagtagtgtgtgcccgctctgttgtgtgactctggtaa < 7500

ctagagatccctcagacccttttagtcagtggtgaaaatctctagcagcatgtgagcaaaaggccagcaaaaggccaggaaccgtaaaaaggccgcttg < 7600

ctggcgttttccatagctccgccccctgacgagcatcacaaaaatcgacgctcaagtcagaggtggcgaaacccgacagactataaagataccagg < 7700

cgtttccccctggaagctccctcgtgctctcctgttccgacctgcccgttaccggatacctgtccgctttctcccttcgggaagcgtggcgctttc < 7800

tcatagctcacgctgtaggtatctcagttcggtgtaggtcgttcgctccaagctgggctgtgtgcacgaacccccgttcagcccagcgtgctcctta < 7900

tccggtaactatcgtcttgagtcacaaccggtaagacacgacttatcgccactggcagcagccactggtaacaggattagcagagcaggtatgtaggcg < 8000

gtgctacagagttcttgaagtggtggcctaactacggctacactagaagaacagtatttggatctgctgctctgctgaagccagttaccttcggaaaaag < 8100

agttggtagctcttgatccggcaaaacaaccaccgctggttagcgggtgtttttttgtttgcaagcagcagattacgcgcagaaaaaaaggatctcaagaa < 8200

gatcctttgatcttttctacggggtctgacgctcagtggaacgaaaactcacgttaagggattttgtcatgagattatcaaaaaggatcttcacctaga < 8300

tccttttaaatataaaatgaagttttaaataatcaatctaaagtatatatgagtaaaacttggctgacagttaccaatgcttaatcagtgagccacctatctc < 8400

agcgatctgtctatcttcttcatccatagttgcctgactccccgctgtgtagataactacgatacgggagggttaccatctggccccagtgctgcaatg < 8500

ataccgagagaccacgctcaccggctccagatttatcagcaataaaccagccagccggaagggccgagcgcagaagtggtcctgcaactttatccgcct < 8600

ccatccagctctattaattgttgccgggaagctagagtaagtagttcgcagttaatagtttgccgaacggttgttgcattgctacagcctcgtgggtgc < 8700

acgctcgtcggtttggtaggttcattcagctccggttcccaacgatcaaggcgagttacatgatcccccatgttgtgcaaaaaagcggttagctccttc < 8800

ggtcctccgatcgttgtcagaagtaagttggcccgagtggtatcactcatggttatggcagcactgcataattctcttactgtcatgccatccgtaagat < 8900

gcttttctgtgactggtgagtactcaaccaagtcattctgagaatagtgtatcggcgaccgagttgctcttcccggcgtcaatacgggataataaccgc < 9000

gccacatagcagaacttttaaagtgtcatcattggaaaacgttcttcggggcgaaaactctcaaggatcttaccgctgttgagatccagttcgatgtaa < 9100

cccactcgtgcaccaactgatcttcagatcttttactttcaccagcgtttctggg < 9157

Features :

|                |   |       |   |       |
|----------------|---|-------|---|-------|
| P-CMV          | : | [3228 | : | 3780] |
| IRES           | : | [4844 | : | 5431] |
| tagBFP         | : | [5432 | : | 6133] |
| Venus          | : | [4117 | : | 4836] |
| ATF4-UTRa      | : | [3837 | : | 4116] |
| ColE1 origin   | : | [8219 | : | 7591] |
| LoxP           | : | [3029 | : | 3062] |
| Amp prom       | : | [141  | : | 113]  |
| HIV-1 5 LTR    | : | [1048 | : | 1228] |
| HIV-1 5 LTR    | : | [7367 | : | 7547] |
| HIV-1 psi pack | : | [1339 | : | 1383] |
| RRE            | : | [1899 | : | 2132] |
