# Supplementary figures and images for: Pharmacological dimerization and activation of the exchange factor eIF2B antagonizes the integrated stress response
Source: eLife journal article supplement (doi:10.7554/elife.07314), 2015-04-15

Figure 2- figure supplement 1

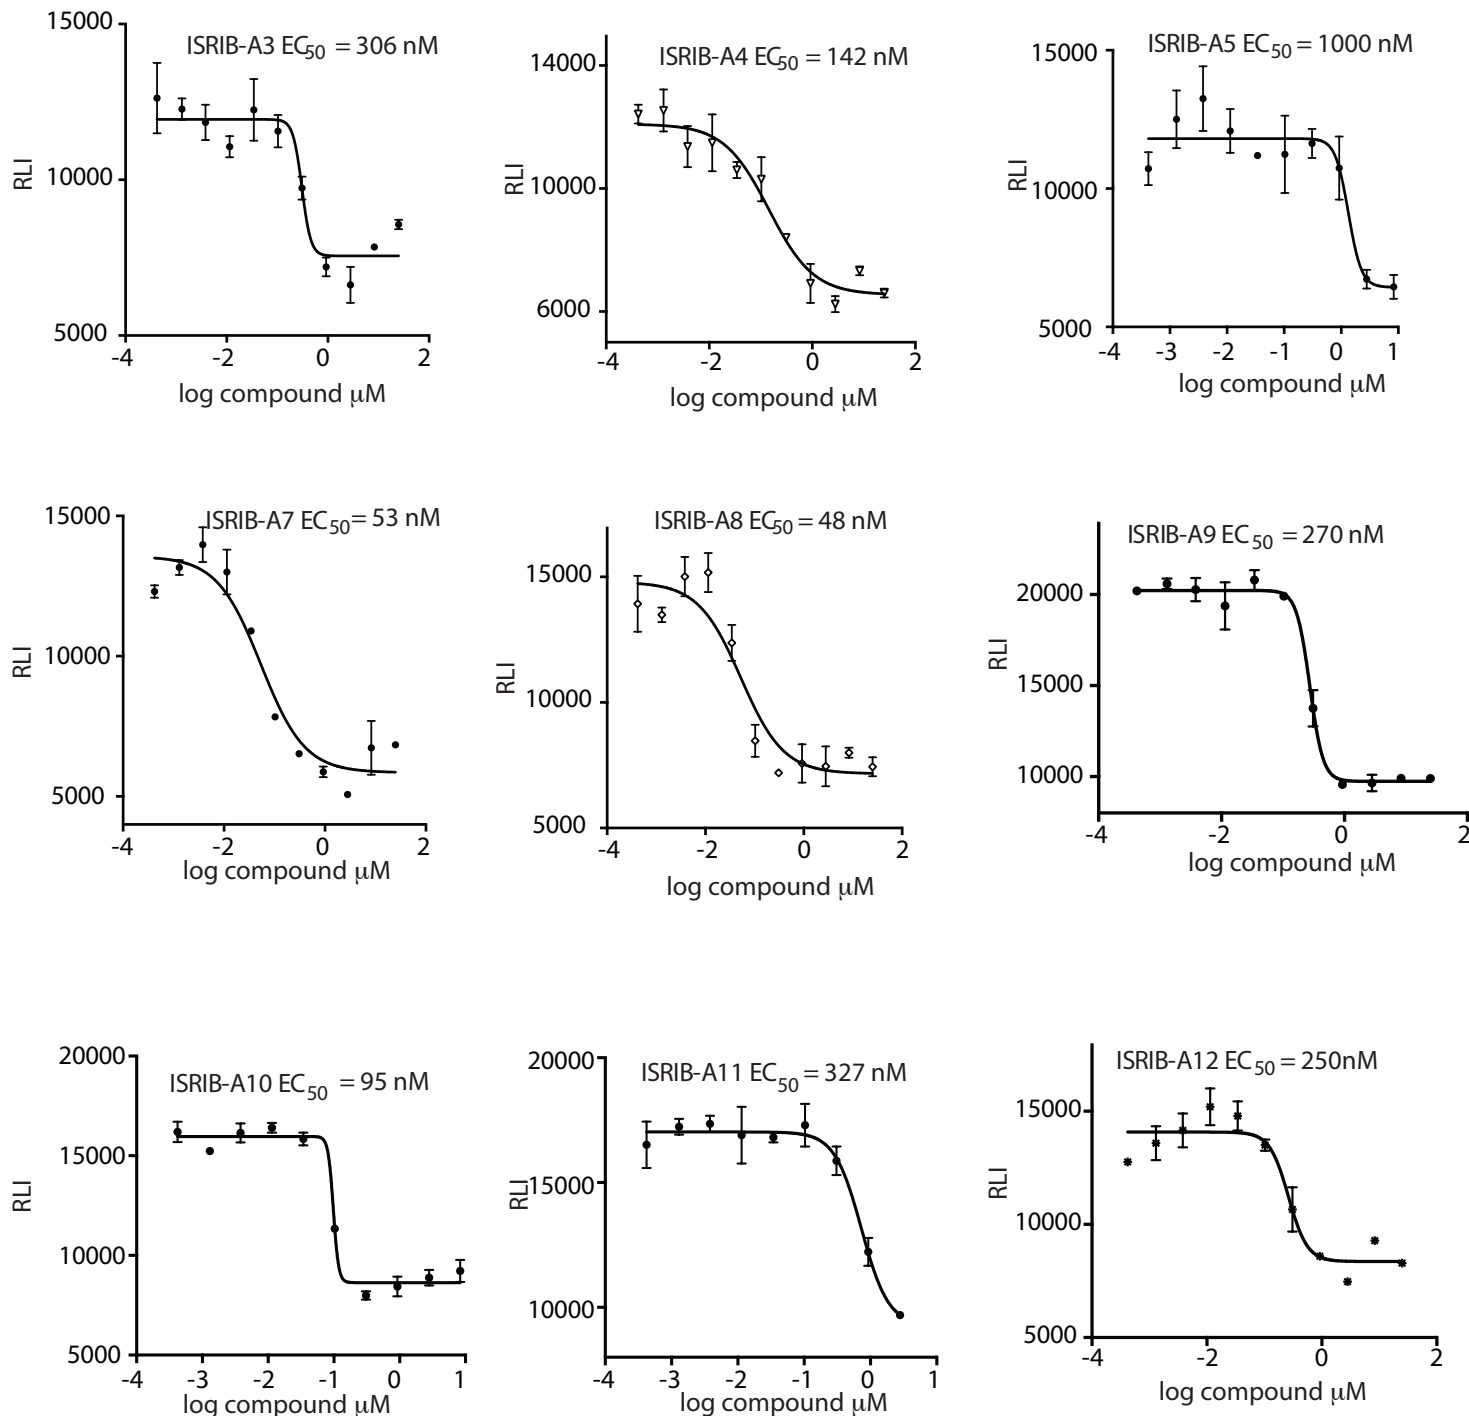

Figure 2- figure supplement 1

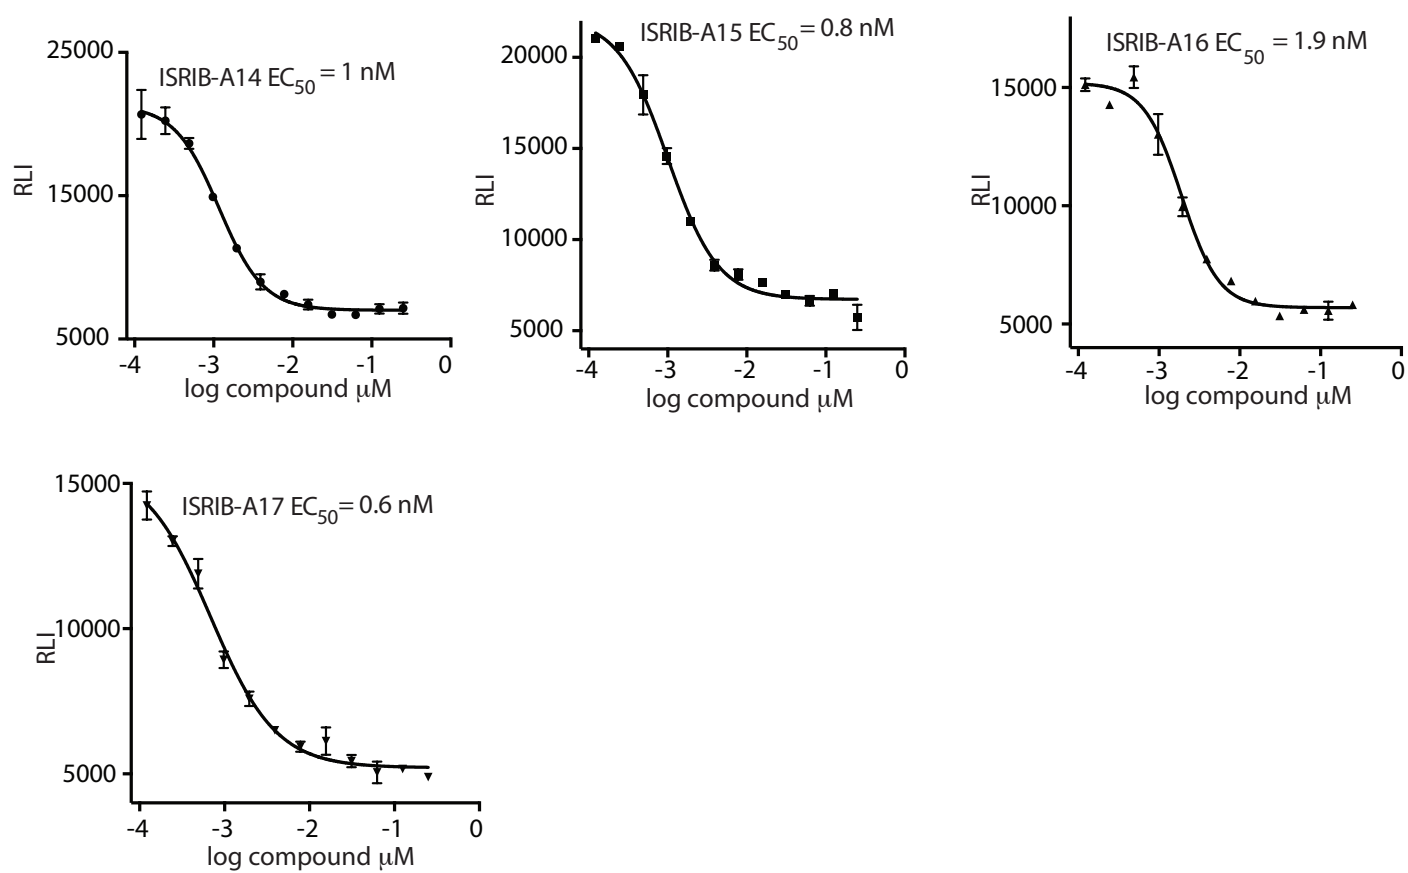

Supplement: supp [file elife_poa_e07314_Figure_2_figure_supplement_1.pdf › elife_poa_e07314_Figure_2_figure_supplement_1.pdf]

Figure 3- figure supplement 1

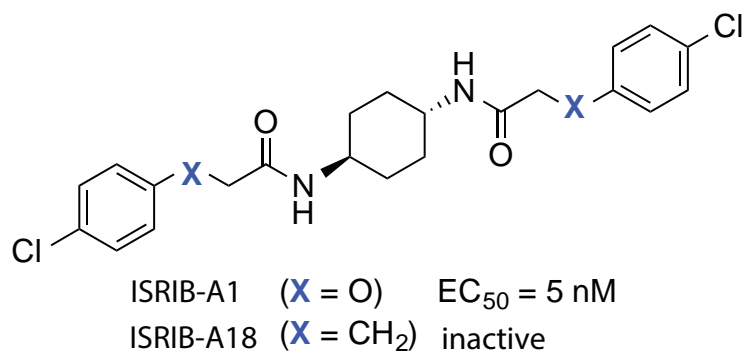

Supplement: supp [file elife_poa_e07314_Figure_3_figure_supplement_1.pdf › elife_poa_e07314_Figure_3_figure_supplement_1.pdf]

Figure 3- Figure Supplement 2

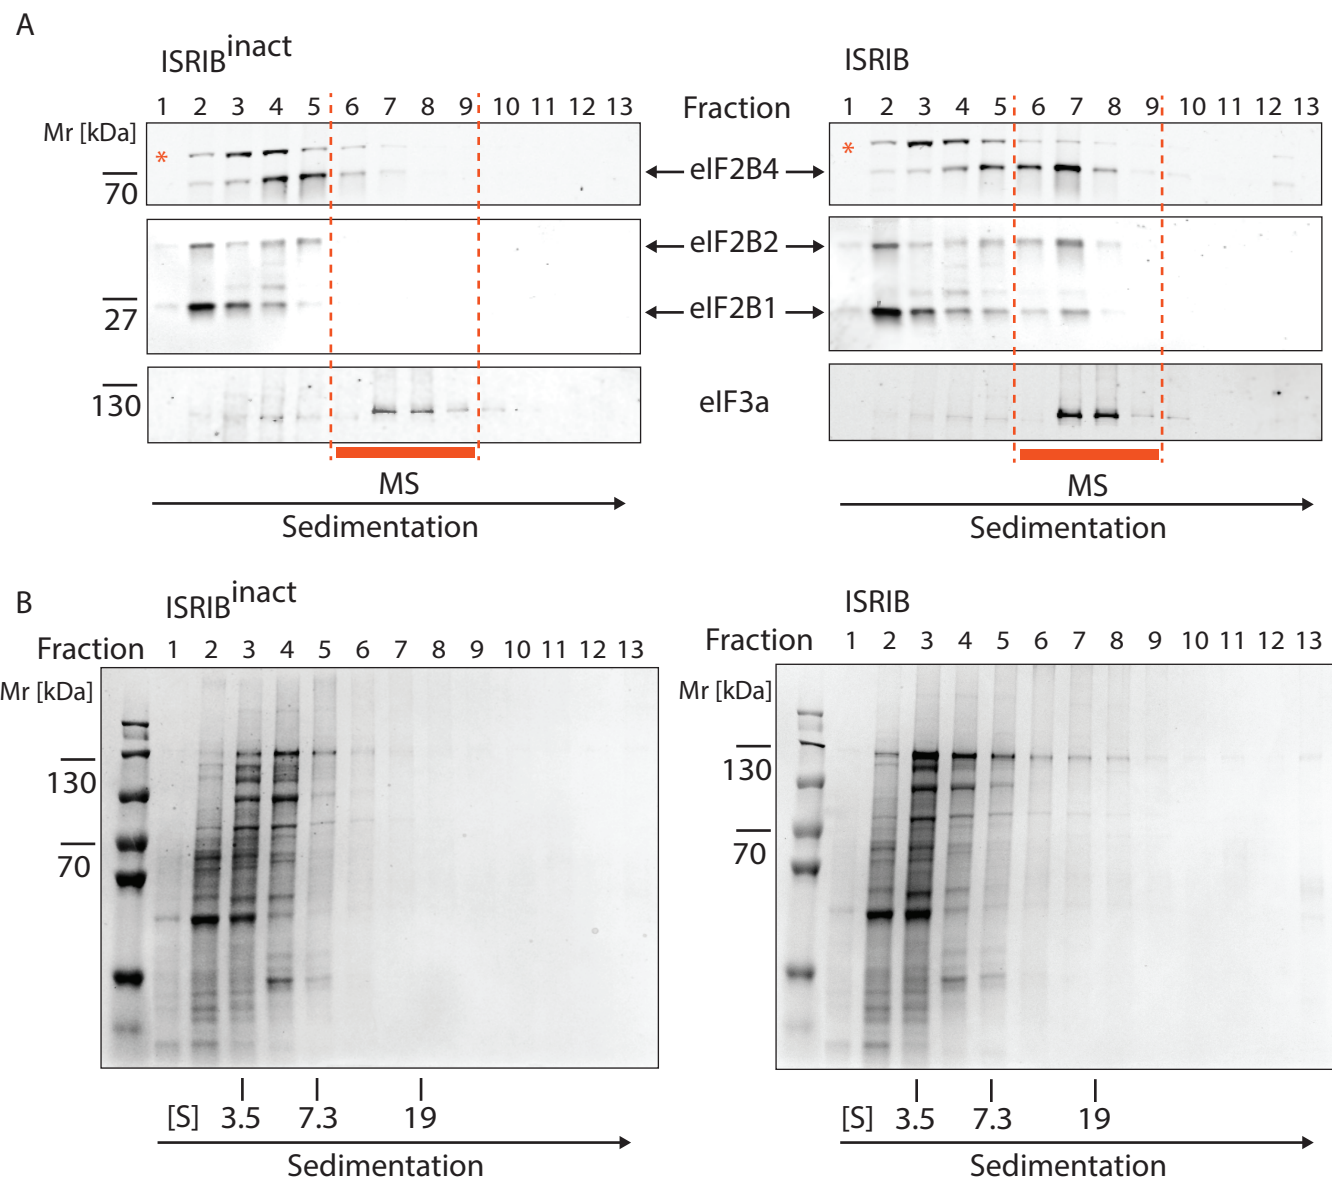

Supplement: supp [file elife_poa_e07314_Figure_3_figure_supplement_2.pdf › elife_poa_e07314_Figure_3_figure_supplement_2.pdf]

Figure 5- figure supplement 1

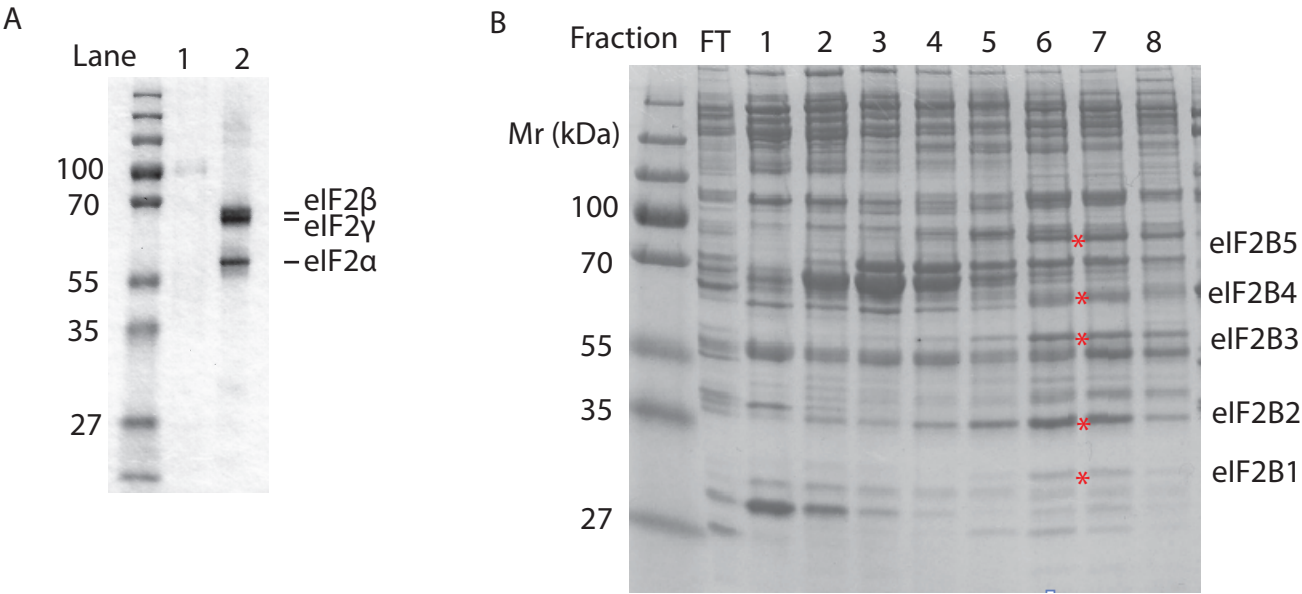

Supplement: supp [file elife_poa_e07314_Figure_5_figure_supplement_1.pdf › elife_poa_e07314_Figure_5_figure_supplement_1.pdf]
